# Supplementary material for: Spatial proteomic alterations detected via MALDI-MS imaging implicate neuronal loss in a Huntington's disease mouse (YAC128) brain
Source: Royal Society of Chemistry journal article supplement (doi:10.1039/d1mo00440a), 2022-02-07
Supplement: d1mo00440a1.pdf [file d1mo00440a1.pdf]

a

1

| reference                                               | m/z              | error (Da)     |
|---------------------------------------------------------|------------------|----------------|
| <b>Myelin Basic Protein (229-236) [M+H]<sup>+</sup></b> | <b>811.4308</b>  | <b>-0.0097</b> |
| Myelin Basic Protein (8-14) [M+H] <sup>+</sup>          | 832.4523         |                |
| <b>Myelin Basic Protein (243-250) [M+H]<sup>+</sup></b> | <b>861.4359</b>  | <b>0.0000</b>  |
| Myelin Basic Protein (187-195) [M+H] <sup>+</sup>       | 944.4544         |                |
| Myelin Basic Protein (9-17) [M+H] <sup>+</sup>          | 962.5153         |                |
| <b>Myelin Basic Protein (15-23) [M+H]<sup>+</sup></b>   | <b>1012.5170</b> | <b>-0.0044</b> |
| <b>Myelin Basic Protein (94-102) [M+H]<sup>+</sup></b>  | <b>1018.5428</b> | <b>-0.0139</b> |
| <b>Myelin Basic Protein (166-175) [M+H]<sup>+</sup></b> | <b>1046.5476</b> | <b>-0.0046</b> |
| Myelin Basic Protein (240-249) [M+H] <sup>+</sup>       | 1063.4949        |                |
| Myelin Basic Protein (229-239) [M+H] <sup>+</sup>       | 1081.5748        |                |
| <b>Myelin Basic Protein (196-205) [M+H]<sup>+</sup></b> | <b>1131.5793</b> | <b>-0.0029</b> |
| <b>Myelin Basic Protein (146-157) [M+H]<sup>+</sup></b> | <b>1336.6314</b> | <b>0.0035</b>  |
| Myelin Basic Protein (211-222) [M+H] <sup>+</sup>       | 1460.7168        |                |
| Myelin Basic Protein (223-236) [M+H] <sup>+</sup>       | 1491.8278        |                |
| <b>Myelin Basic Protein (144-157) [M+H]<sup>+</sup></b> | <b>1551.7584</b> | <b>0.0046</b>  |
| <b>Myelin Basic Protein (196-210) [M+H]<sup>+</sup></b> | <b>1696.8514</b> | <b>0.0045</b>  |
| <b>Myelin Basic Protein (166-181) [M+H]<sup>+</sup></b> | <b>1755.8660</b> | <b>0.0093</b>  |
| <b>Myelin Basic Protein (206-222) [M+H]<sup>+</sup></b> | <b>2025.9889</b> | <b>0.0152</b>  |
| <b>Myelin Basic Protein (211-228) [M+H]<sup>+</sup></b> | <b>2141.1138</b> | <b>0.0028</b>  |

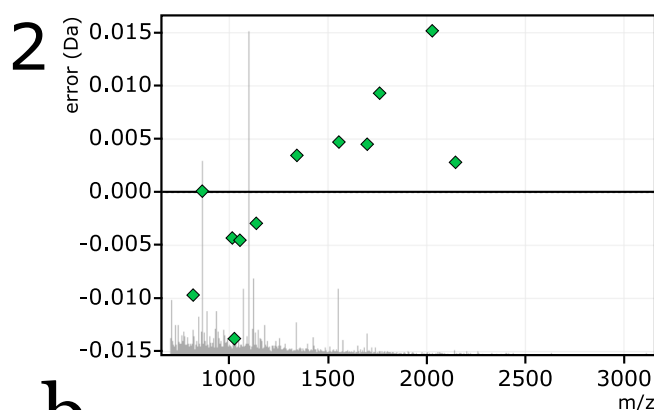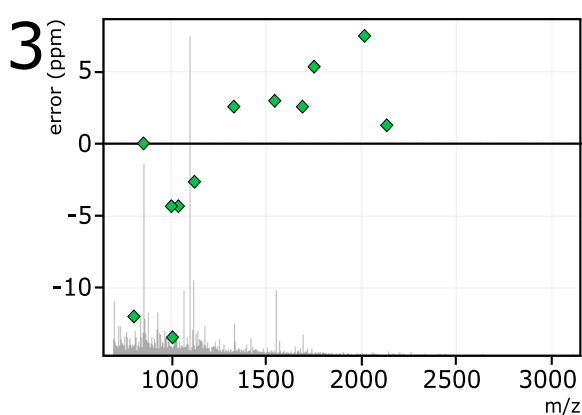

b

1

| reference                                  | m/z              | error (Da)     |
|--------------------------------------------|------------------|----------------|
| <b>Trypsin (108-115) [M+H]<sup>+</sup></b> | <b>842.5094</b>  | <b>-0.0056</b> |
| Trypsin (209-216) [M+H] <sup>+</sup>       | 906.5044         |                |
| Trypsin (1-8) [M+H] <sup>+</sup>           | 952.3894         |                |
| Trypsin (148-157) [M+H] <sup>+</sup>       | 1006.4874        |                |
| <b>Trypsin (98-107) [M+H]<sup>+</sup></b>  | <b>1045.5637</b> | <b>-0.0147</b> |
| <b>Trypsin (134-147) [M+H]<sup>+</sup></b> | <b>1469.7305</b> | <b>0.0169</b>  |
| Trypsin (58-72) [M+H] <sup>+</sup>         | 1713.8084        |                |
| Trypsin (217-231) [M+H] <sup>+</sup>       | 1736.8425        |                |
| Trypsin (116-133) [M+H] <sup>+</sup>       | 1768.7993        |                |
| <b>Trypsin (62-77) [M+H]<sup>+</sup></b>   | <b>1774.8975</b> | <b>-0.0092</b> |
| Trypsin (58-76) [M+H] <sup>+</sup>         | 2083.0096        |                |
| Trypsin (158-178) [M+H] <sup>+</sup>       | 2158.0307        |                |
| Trypsin (58-77) [M+H] <sup>+</sup>         | 2211.1040        |                |
| Trypsin (78-97) [M+H] <sup>+</sup>         | 2283.1802        |                |
| Trypsin (179-208) [M+H] <sup>+</sup>       | 3013.3237        |                |

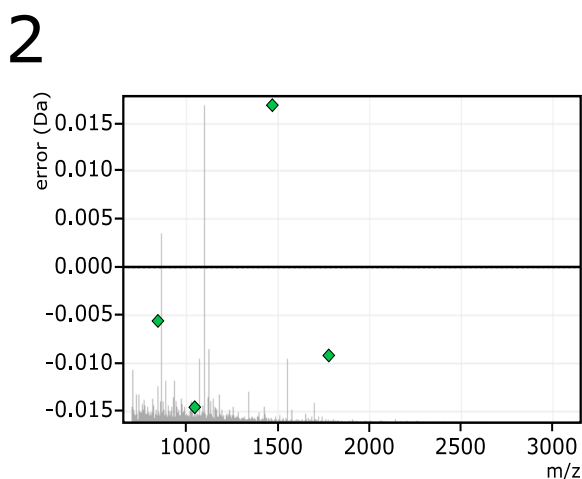

**Supplemental Figure 1: Representative table and graphics of matching error rates between known m/z values of MBP or trypsin peptides and calibrated m/z values obtained from MALDI-MSI analysis.**  
a Matching Da error rates for MBP 1, graphical representation of Da and ppm error rate for MBP, respectively 2,3. b Matching Da error rates for Trypsin peptides 1, graphical representation of Da error rate for Trypsin peptides 2. MBP, Myelin Basic Protein.
