# Supplementary material for: Spatial proteomic alterations detected via MALDI-MS imaging implicate neuronal loss in a Huntington's disease mouse (YAC128) brain
Source: Royal Society of Chemistry journal article supplement (doi:10.1039/d1mo00440a), 2022-02-07
Supplement: d1mo00440a2.xlsx [file d1mo00440a2.xlsx]

## Sheet: on-tissue peptides
Supplemental Material 1: all peptides list (LCMSMS)_on tissue peptides
						Best identification
Peptide identifier	Ions	Deconvoluted peptide ions	Deconvoluted charges	Retention time (min)	Neutral mass	Score	Sequence	Modifications	Accession	Description
56.86_906.5169n	2	#1304,#2339	1,2	56.855	906.517	8.5237	NLLSVAYK		P62259	1433E_MOUSE 14-3-3 protein epsilon OS=Mus musculus OX=10090 GN=Ywhae PE=1 SV=1
45.58_1193.6037n	1	#12939	2	45.5818	1193.6	7.0441	EAAENSLVAYK		P62259	1433E_MOUSE 14-3-3 protein epsilon OS=Mus musculus OX=10090 GN=Ywhae PE=1 SV=1
70.46_1516.8692n	1	#156791	3	70.4649	1516.87	6.6635	NLLSVAYKNVIGAR		P62259	1433E_MOUSE 14-3-3 protein epsilon OS=Mus musculus OX=10090 GN=Ywhae PE=1 SV=1
54.75_1523.6957n	1	#1852	2	54.7488	1523.7	7.3191	MDDREDLVYQAK	[N-term] Acetyl N-TERM	P62259	1433E_MOUSE 14-3-3 protein epsilon OS=Mus musculus OX=10090 GN=Ywhae PE=1 SV=1
54.32_1523.7037n	1	#25503	2	54.3194	1523.7	7.0187	MDDREDLVYQAK	[N-term] Acetyl N-TERM	P62259	1433E_MOUSE 14-3-3 protein epsilon OS=Mus musculus OX=10090 GN=Ywhae PE=1 SV=1
57.99_1927.8659n	2	#20172,#14430	2,3	57.9893	1927.87	7.5796	LAEQAERYDEMVESMK		P62259	1433E_MOUSE 14-3-3 protein epsilon OS=Mus musculus OX=10090 GN=Ywhae PE=1 SV=1
40.77_867.3490n	1	#183179	1	40.7711	867.349	0	DDMASAMK		P68510	1433F_MOUSE 14-3-3 protein eta OS=Mus musculus OX=10090 GN=Ywhah PE=1 SV=2
56.86_906.5169n	2	#1304,#2339	1,2	56.855	906.517	8.5237	NLLSVAYK		P68510	1433F_MOUSE 14-3-3 protein eta OS=Mus musculus OX=10090 GN=Ywhah PE=1 SV=2
69.80_985.5288n	1	#197993	2	69.7969	985.529	6.7625	VFYLKMK	[N-term] Acetyl N-TERM|[6] Oxidation M	P68510	1433F_MOUSE 14-3-3 protein eta OS=Mus musculus OX=10090 GN=Ywhah PE=1 SV=2
40.41_1030.4074n	1	#173991	1	40.4108	1030.41	7.6893	YDDMASAMK		P68510	1433F_MOUSE 14-3-3 protein eta OS=Mus musculus OX=10090 GN=Ywhah PE=1 SV=2
41.28_1030.4091n	1	#218780	2	41.2802	1030.41	6.6362	YDDMASAMK		P68510	1433F_MOUSE 14-3-3 protein eta OS=Mus musculus OX=10090 GN=Ywhah PE=1 SV=2
40.75_1030.4122n	2	#68981,#4908	1,2	40.754	1030.41	7.9044	YDDMASAMK		P68510	1433F_MOUSE 14-3-3 protein eta OS=Mus musculus OX=10090 GN=Ywhah PE=1 SV=2
40.45_1030.4127n	1	#33444	2	40.4451	1030.41	7.6893	YDDMASAMK		P68510	1433F_MOUSE 14-3-3 protein eta OS=Mus musculus OX=10090 GN=Ywhah PE=1 SV=2
54.46_1418.7528n	2	#3916,#22295	2,3	54.4596	1418.75	8.0449	SSWRVISSIEQK		P68510	1433F_MOUSE 14-3-3 protein eta OS=Mus musculus OX=10090 GN=Ywhah PE=1 SV=2
67.17_1502.8558n	2	#707,#4335	2,3	67.1661	1502.86	8.1368	NLLSVAYKNVVGAR		P68510	1433F_MOUSE 14-3-3 protein eta OS=Mus musculus OX=10090 GN=Ywhah PE=1 SV=2
67.52_1502.8582n	1	#9921	3	67.5225	1502.86	7.8753	NLLSVAYKNVVGAR		P68510	1433F_MOUSE 14-3-3 protein eta OS=Mus musculus OX=10090 GN=Ywhah PE=1 SV=2
50.43_1585.7575n	1	#9578	2	50.426	1585.76	8.2316	AVTELNEPLSNEDR		P68510	1433F_MOUSE 14-3-3 protein eta OS=Mus musculus OX=10090 GN=Ywhah PE=1 SV=2
49.97_1585.7598n	1	#31812	2	49.9745	1585.76	8.0388	AVTELNEPLSNEDR		P68510	1433F_MOUSE 14-3-3 protein eta OS=Mus musculus OX=10090 GN=Ywhah PE=1 SV=2
50.46_1827.8163n	1	#8327	2	50.4624	1827.82	8.1495	LAEQAERYDDMASAMK		P68510	1433F_MOUSE 14-3-3 protein eta OS=Mus musculus OX=10090 GN=Ywhah PE=1 SV=2
50.19_1827.8174n	2	#49934,#6808	2,3	50.188	1827.82	8.258	LAEQAERYDDMASAMK		P68510	1433F_MOUSE 14-3-3 protein eta OS=Mus musculus OX=10090 GN=Ywhah PE=1 SV=2
50.46_1827.8202n	1	#2472	3	50.4624	1827.82	8.1495	LAEQAERYDDMASAMK		P68510	1433F_MOUSE 14-3-3 protein eta OS=Mus musculus OX=10090 GN=Ywhah PE=1 SV=2
70.42_2474.2665n	1	#1666	3	70.4192	2474.27	7.8672	AVTELNEPLSNEDRNLLSVAYK		P68510	1433F_MOUSE 14-3-3 protein eta OS=Mus musculus OX=10090 GN=Ywhah PE=1 SV=2
56.86_906.5169n	2	#1304,#2339	1,2	56.855	906.517	8.5237	NLLSVAYK		P61982	1433G_MOUSE 14-3-3 protein gamma OS=Mus musculus OX=10090 GN=Ywhag PE=1 SV=2
69.80_985.5288n	1	#197993	2	69.7969	985.529	6.7625	VFYLKMK	[N-term] Acetyl N-TERM|[6] Oxidation M	P61982	1433G_MOUSE 14-3-3 protein gamma OS=Mus musculus OX=10090 GN=Ywhag PE=1 SV=2
42.61_1014.4148n	2	#7319,#914	1,2	42.6128	1014.41	8.5539	YDDMAAAMK		P61982	1433G_MOUSE 14-3-3 protein gamma OS=Mus musculus OX=10090 GN=Ywhag PE=1 SV=2
43.24_1014.4166n	1	#17604	2	43.242	1014.42	8.1309	YDDMAAAMK		P61982	1433G_MOUSE 14-3-3 protein gamma OS=Mus musculus OX=10090 GN=Ywhag PE=1 SV=2
42.15_1014.4186n	1	#4870	2	42.1496	1014.42	8.2359	YDDMAAAMK		P61982	1433G_MOUSE 14-3-3 protein gamma OS=Mus musculus OX=10090 GN=Ywhag PE=1 SV=2
42.96_1079.5442n	1	#217773	1	42.956	1079.54	7.9914	YLAEVATGEK		P61982	1433G_MOUSE 14-3-3 protein gamma OS=Mus musculus OX=10090 GN=Ywhag PE=1 SV=2
42.94_1079.5490n	1	#21653	2	42.9388	1079.55	7.9914	YLAEVATGEK		P61982	1433G_MOUSE 14-3-3 protein gamma OS=Mus musculus OX=10090 GN=Ywhag PE=1 SV=2
46.99_1244.6464n	1	#7041	2	46.9949	1244.65	7.4389	MVDREQLVQK		P61982	1433G_MOUSE 14-3-3 protein gamma OS=Mus musculus OX=10090 GN=Ywhag PE=1 SV=2
46.99_1244.6564n	1	#7494	2	46.9949	1244.66	7.4389	MVDREQLVQK		P61982	1433G_MOUSE 14-3-3 protein gamma OS=Mus musculus OX=10090 GN=Ywhag PE=1 SV=2
54.46_1418.7528n	2	#3916,#22295	2,3	54.4596	1418.75	8.0449	SSWRVISSIEQK		P61982	1433G_MOUSE 14-3-3 protein gamma OS=Mus musculus OX=10090 GN=Ywhag PE=1 SV=2
67.17_1502.8558n	2	#707,#4335	2,3	67.1661	1502.86	8.1368	NLLSVAYKNVVGAR		P61982	1433G_MOUSE 14-3-3 protein gamma OS=Mus musculus OX=10090 GN=Ywhag PE=1 SV=2
67.52_1502.8582n	1	#9921	3	67.5225	1502.86	7.8753	NLLSVAYKNVVGAR		P61982	1433G_MOUSE 14-3-3 protein gamma OS=Mus musculus OX=10090 GN=Ywhag PE=1 SV=2
50.61_1642.7829n	1	#967	2	50.6101	1642.78	8.5759	NVTELNEPLSNEER		P61982	1433G_MOUSE 14-3-3 protein gamma OS=Mus musculus OX=10090 GN=Ywhag PE=1 SV=2
50.91_1642.7853n	1	#2040	2	50.9105	1642.79	8.1102	NVTELNEPLSNEER		P61982	1433G_MOUSE 14-3-3 protein gamma OS=Mus musculus OX=10090 GN=Ywhag PE=1 SV=2
51.86_1811.8247n	2	#471,#224	2,3	51.8607	1811.82	8.8989	LAEQAERYDDMAAAMK		P61982	1433G_MOUSE 14-3-3 protein gamma OS=Mus musculus OX=10090 GN=Ywhag PE=1 SV=2
51.49_1811.8284n	1	#2154	3	51.4858	1811.83	8.3946	LAEQAERYDDMAAAMK		P61982	1433G_MOUSE 14-3-3 protein gamma OS=Mus musculus OX=10090 GN=Ywhag PE=1 SV=2
51.88_1827.8149n	1	#78178	2	51.8791	1827.81	6.5748	LAEQAERYDDMAAAMK	[11] Oxidation M	P61982	1433G_MOUSE 14-3-3 protein gamma OS=Mus musculus OX=10090 GN=Ywhag PE=1 SV=2
43.99_1827.8199n	1	#46297	3	43.9915	1827.82	6.3119	LAEQAERYDDMAAAMK	[15] Oxidation M	P61982	1433G_MOUSE 14-3-3 protein gamma OS=Mus musculus OX=10090 GN=Ywhag PE=1 SV=2
75.23_2531.2881n	1	#2028	3	75.2258	2531.29	8.1398	NVTELNEPLSNEERNLLSVAYK		P61982	1433G_MOUSE 14-3-3 protein gamma OS=Mus musculus OX=10090 GN=Ywhag PE=1 SV=2
50.12_2618.2074n	1	#160559	5	50.1158	2618.21	4.6802	HEISPGHDGAWNDSQLQEMAQLR		Q8C0J2	A16L1_MOUSE Autophagy-related protein 16-1 OS=Mus musculus OX=10090 GN=Atg16l1 PE=1 SV=1
61.74_986.5336n	2	#75765,#5562	1,2	61.7408	986.534	6.3866	REIQIMR	[N-term] Acetyl N-TERM	Q3UHJ0	AAK1_MOUSE AP2-associated protein kinase 1 OS=Mus musculus OX=10090 GN=Aak1 PE=1 SV=2
39.85_1393.7534n	1	#81755	2	39.8503	1393.75	6.2255	VQTTPPPTIQGQK		Q3UHJ0	AAK1_MOUSE AP2-associated protein kinase 1 OS=Mus musculus OX=10090 GN=Aak1 PE=1 SV=2
37.06_1566.7415n	1	#95257	2	37.0648	1566.74	6.4534	AQATPSQPLQSSQPK		Q3UHJ0	AAK1_MOUSE AP2-associated protein kinase 1 OS=Mus musculus OX=10090 GN=Aak1 PE=1 SV=2
60.41_1610.8453n	1	#10958	2	60.4099	1610.85	6.8066	LTDPIPTTETSIAPR		Q3UHJ0	AAK1_MOUSE AP2-associated protein kinase 1 OS=Mus musculus OX=10090 GN=Aak1 PE=1 SV=2
60.80_1610.8489n	1	#1468	2	60.8021	1610.85	7.8211	LTDPIPTTETSIAPR		Q3UHJ0	AAK1_MOUSE AP2-associated protein kinase 1 OS=Mus musculus OX=10090 GN=Aak1 PE=1 SV=2
64.10_1614.8396n	1	#18208	2	64.1006	1614.84	7.0038	STQLLQAAAAEASLNK		Q3UHJ0	AAK1_MOUSE AP2-associated protein kinase 1 OS=Mus musculus OX=10090 GN=Aak1 PE=1 SV=2
61.30_1726.9213n	2	#7673,#8836	2,3	61.2984	1726.92	7.2916	ILSDVTHSAVFGVPASK		Q3UHJ0	AAK1_MOUSE AP2-associated protein kinase 1 OS=Mus musculus OX=10090 GN=Aak1 PE=1 SV=2
57.19_1837.9889n	1	#45746	2	57.1872	1837.99	7.1214	ARLTDPIPTTETSIAPR		Q3UHJ0	AAK1_MOUSE AP2-associated protein kinase 1 OS=Mus musculus OX=10090 GN=Aak1 PE=1 SV=2
72.27_1960.0662n	1	#16577	3	72.2727	1960.07	6.4329	ADVAVESLIPGLEPPVAQR		Q3UHJ0	AAK1_MOUSE AP2-associated protein kinase 1 OS=Mus musculus OX=10090 GN=Aak1 PE=1 SV=2
45.97_2014.9718n	1	#107460	3	45.9711	2014.97	5.6476	FQNPQAEGVNAVEDEIKK		Q3UHJ0	AAK1_MOUSE AP2-associated protein kinase 1 OS=Mus musculus OX=10090 GN=Aak1 PE=1 SV=2
73.54_2068.1433n	1	#3224	2	73.5439	2068.14	7.724	AGQTQPNPGILPIQPALTPR		Q3UHJ0	AAK1_MOUSE AP2-associated protein kinase 1 OS=Mus musculus OX=10090 GN=Aak1 PE=1 SV=2
59.18_2120.1699n	2	#17675,#14333	3,4	59.1819	2120.17	6.0845	LTDPIPTTETSIAPRQRPK		Q3UHJ0	AAK1_MOUSE AP2-associated protein kinase 1 OS=Mus musculus OX=10090 GN=Aak1 PE=1 SV=2
49.17_2557.2045n	1	#68756	3	49.1679	2557.2	6.071	REQGSSGLGSGSSGGGGSSSGLGSGYIGR		Q3UHJ0	AAK1_MOUSE AP2-associated protein kinase 1 OS=Mus musculus OX=10090 GN=Aak1 PE=1 SV=2
60.60_2577.4171n	1	#209395	5	60.5953	2577.42	5.8489	QRPKAGQTQPNPGILPIQPALTPR		Q3UHJ0	AAK1_MOUSE AP2-associated protein kinase 1 OS=Mus musculus OX=10090 GN=Aak1 PE=1 SV=2
60.43_2577.4349n	1	#93466	5	60.433	2577.43	5.8489	QRPKAGQTQPNPGILPIQPALTPR		Q3UHJ0	AAK1_MOUSE AP2-associated protein kinase 1 OS=Mus musculus OX=10090 GN=Aak1 PE=1 SV=2
67.55_2581.3770n	1	#6806	3	67.5454	2581.38	7.4482	ATVQPLPQAAGPSNQPGLLPSVSQPK		Q3UHJ0	AAK1_MOUSE AP2-associated protein kinase 1 OS=Mus musculus OX=10090 GN=Aak1 PE=1 SV=2
91.30_2945.5369n	1	#109385	4	91.2978	2945.54	5.9584	GGQAVDSGIPLLSVSDPFIPLQVPDAPEK		Q3UHJ0	AAK1_MOUSE AP2-associated protein kinase 1 OS=Mus musculus OX=10090 GN=Aak1 PE=1 SV=2
99.36_3073.5642n	1	#50019	4	99.3589	3073.56	6.0298	KGGQAVDSGIPLLSVSDPFIPLQVPDAPEK		Q3UHJ0	AAK1_MOUSE AP2-associated protein kinase 1 OS=Mus musculus OX=10090 GN=Aak1 PE=1 SV=2
59.55_3179.6648n	1	#15013	3	59.5499	3179.66	7.3942	TAVVVPQSQAQPATAPQAAAAQEPGQIQAPVR		Q3UHJ0	AAK1_MOUSE AP2-associated protein kinase 1 OS=Mus musculus OX=10090 GN=Aak1 PE=1 SV=2
78.27_3324.6002n	2	#152,#1189	3,4	78.2748	3324.6	5.8697	LGGSAESLIPGFQPTQGDAFTTPSFSAGTAEKR		Q3UHJ0	AAK1_MOUSE AP2-associated protein kinase 1 OS=Mus musculus OX=10090 GN=Aak1 PE=1 SV=2
54.84_3660.9170n	1	#80035	4	54.8417	3660.92	6.6212	TAVVVPQSQAQPATAPQAAAAQEPGQIQAPVRQQPK		Q3UHJ0	AAK1_MOUSE AP2-associated protein kinase 1 OS=Mus musculus OX=10090 GN=Aak1 PE=1 SV=2
55.24_3660.9228n	1	#28759	4	55.2366	3660.92	6.9944	TAVVVPQSQAQPATAPQAAAAQEPGQIQAPVRQQPK		Q3UHJ0	AAK1_MOUSE AP2-associated protein kinase 1 OS=Mus musculus OX=10090 GN=Aak1 PE=1 SV=2
50.76_3923.0080n	1	#8657	4	50.7583	3923.01	7.5158	QPQAPPTPQQTPATQTQGLPTQAQATPQHQQQHLLK		Q3UHJ0	AAK1_MOUSE AP2-associated protein kinase 1 OS=Mus musculus OX=10090 GN=Aak1 PE=1 SV=2
93.73_3925.9462n	1	#30688	4	93.7297	3925.95	7.0028	TDSLTGEDSLLDCSLLSNPTAGLLEEFAPIALSAPTHK		Q3UHJ0	AAK1_MOUSE AP2-associated protein kinase 1 OS=Mus musculus OX=10090 GN=Aak1 PE=1 SV=2
52.15_5471.7835n	1	#60827	5	52.1454	5471.78	6.8829	AQATPSQPLQSSQPKQPQAPPTPQQTPATQTQGLPTQAQATPQHQQQHLLK		Q3UHJ0	AAK1_MOUSE AP2-associated protein kinase 1 OS=Mus musculus OX=10090 GN=Aak1 PE=1 SV=2
56.78_847.4505n	2	#26594,#4588	1,2	56.7849	847.451	7.3794	IGADFLGR		P05201	AATC_MOUSE Aspartate aminotransferase_ cytoplasmic OS=Mus musculus OX=10090 GN=Got1 PE=1 SV=3
42.44_1075.6166n	1	#1399	2	42.4413	1075.62	6.0196	KVNLGVGAYR		P05201	AATC_MOUSE Aspartate aminotransferase_ cytoplasmic OS=Mus musculus OX=10090 GN=Got1 PE=1 SV=3
51.16_1270.6991n	1	#449	2	51.158	1270.7	8.1361	VGGVQSLGGTGALR		P05201	AATC_MOUSE Aspartate aminotransferase_ cytoplasmic OS=Mus musculus OX=10090 GN=Got1 PE=1 SV=3
74.39_1845.9754n	1	#39859	3	74.3856	1845.98	6.9538	IVAATLSDPELFKEWK		P05201	AATC_MOUSE Aspartate aminotransferase_ cytoplasmic OS=Mus musculus OX=10090 GN=Got1 PE=1 SV=3
88.04_1991.1186n	2	#16833,#100372	2,3	88.0407	1991.12	7.6906	APPSVFAQVPQAPPVLVFK		P05201	AATC_MOUSE Aspartate aminotransferase_ cytoplasmic OS=Mus musculus OX=10090 GN=Got1 PE=1 SV=3
61.88_2695.3221n	1	#21381	3	61.883	2695.32	5.9498	INMCGLTTKNLDYVATSIHEAVTK	[3] Oxidation M|[4] Carboxymethyl C	P05201	AATC_MOUSE Aspartate aminotransferase_ cytoplasmic OS=Mus musculus OX=10090 GN=Got1 PE=1 SV=3
56.73_1397.8164n	1	#143099	3	56.7268	1397.82	6.3551	IAATILTSPDLRK		P05202	AATM_MOUSE Aspartate aminotransferase_ mitochondrial OS=Mus musculus OX=10090 GN=Got2 PE=1 SV=1
59.11_1556.7918n	1	#12907	2	59.1131	1556.79	7.1347	ASAELALGENNEVLK		P05202	AATM_MOUSE Aspartate aminotransferase_ mitochondrial OS=Mus musculus OX=10090 GN=Got2 PE=1 SV=1
63.26_1793.0338n	1	#38841	3	63.2636	1793.03	6.6373	ILIRPLYSNPPLNGAR		P05202	AATM_MOUSE Aspartate aminotransferase_ mitochondrial OS=Mus musculus OX=10090 GN=Got2 PE=1 SV=1
54.97_1803.8306n	2	#59803,#64340	2,3	54.9696	1803.83	7.0792	DAGMQLQGYRYYDPK		P05202	AATM_MOUSE Aspartate aminotransferase_ mitochondrial OS=Mus musculus OX=10090 GN=Got2 PE=1 SV=1
81.18_1908.9633n	2	#8147,#9891	2,3	81.178	1908.96	8.1797	NLDKEYLPIGGLAEFCK		P05202	AATM_MOUSE Aspartate aminotransferase_ mitochondrial OS=Mus musculus OX=10090 GN=Got2 PE=1 SV=1
72.00_2321.2459n	2	#3391,#2574	3,4	71.997	2321.25	7.7057	ISVAGVTSGNVGYLAHAIHQVTK		P05202	AATM_MOUSE Aspartate aminotransferase_ mitochondrial OS=Mus musculus OX=10090 GN=Got2 PE=1 SV=1
71.64_2321.2469n	1	#14043	4	71.6374	2321.25	7.3796	ISVAGVTSGNVGYLAHAIHQVTK		P05202	AATM_MOUSE Aspartate aminotransferase_ mitochondrial OS=Mus musculus OX=10090 GN=Got2 PE=1 SV=1
61.90_2420.2228n	1	#2919	3	61.9049	2420.22	7.4169	MNLGVGAYRDDNGKPYVLPSVR		P05202	AATM_MOUSE Aspartate aminotransferase_ mitochondrial OS=Mus musculus OX=10090 GN=Got2 PE=1 SV=1
92.46_2736.4364n	2	#239,#15812	3,4	92.4629	2736.44	6.0156	ETMGIPTMILLGHSLGGFLATSYSIK		Q8VD66	ABHD4_MOUSE (Lyso)-N-acylphosphatidylethanolamine lipase OS=Mus musculus OX=10090 GN=Abhd4 PE=1 SV=1
61.25_1782.9467n	1	#7396	2	61.2545	1782.95	5.9986	KPIDYTILDDIGHGVK		P62484	ABI2_MOUSE Abl interactor 2 OS=Mus musculus OX=10090 GN=Abi2 PE=1 SV=1
61.22_1782.9521n	2	#5351,#1979	2,3	61.2204	1782.95	5.9986	KPIDYTILDDIGHGVK		P62484	ABI2_MOUSE Abl interactor 2 OS=Mus musculus OX=10090 GN=Abi2 PE=1 SV=1
79.43_2278.2276n	2	#814,#123363	3,4	79.4283	2278.23	6.4375	APGGPVSAFLGIPFAEPPVGSRR		P21836	ACES_MOUSE Acetylcholinesterase OS=Mus musculus OX=10090 GN=Ache PE=1 SV=1
60.34_588.3253n	1	#30102	1	60.3404	588.325	0	FKLEA		Q99KI0	ACON_MOUSE Aconitate hydratase_ mitochondrial OS=Mus musculus OX=10090 GN=Aco2 PE=1 SV=1
60.34_628.3190n	1	#24414	1	60.3404	628.319	0	DELPR		Q99KI0	ACON_MOUSE Aconitate hydratase_ mitochondrial OS=Mus musculus OX=10090 GN=Aco2 PE=1 SV=1
46.79_779.4052n	1	#41465	2	46.7947	779.405	7.2937	YDLLEK		Q99KI0	ACON_MOUSE Aconitate hydratase_ mitochondrial OS=Mus musculus OX=10090 GN=Aco2 PE=1 SV=1
68.52_984.4963n	1	#140494	1	68.5202	984.496	6.0903	EGWPLDIR		Q99KI0	ACON_MOUSE Aconitate hydratase_ mitochondrial OS=Mus musculus OX=10090 GN=Aco2 PE=1 SV=1
46.04_987.4884n	1	#4294	1	46.0397	987.488	6.4465	VDVSPTSQR		Q99KI0	ACON_MOUSE Aconitate hydratase_ mitochondrial OS=Mus musculus OX=10090 GN=Aco2 PE=1 SV=1
53.22_1224.6056n	1	#3691	2	53.2229	1224.61	7.5875	LEAPDADELPR		Q99KI0	ACON_MOUSE Aconitate hydratase_ mitochondrial OS=Mus musculus OX=10090 GN=Aco2 PE=1 SV=1
39.73_1363.7918n	1	#192225	3	39.7302	1363.79	6.3371	SAAVAKQALAHGLK		Q99KI0	ACON_MOUSE Aconitate hydratase_ mitochondrial OS=Mus musculus OX=10090 GN=Aco2 PE=1 SV=1
53.18_1460.8853n	1	#153125	3	53.1769	1460.89	6.0591	IHPVDKLTIQGLK		Q99KI0	ACON_MOUSE Aconitate hydratase_ mitochondrial OS=Mus musculus OX=10090 GN=Aco2 PE=1 SV=1
55.70_1462.7410n	1	#6178	2	55.697	1462.74	8.055	SQFTITPGSEQIR		Q99KI0	ACON_MOUSE Aconitate hydratase_ mitochondrial OS=Mus musculus OX=10090 GN=Aco2 PE=1 SV=1
59.90_1499.7537n	1	#24320	3	59.8954	1499.75	7.6098	FKLEAPDADELPR		Q99KI0	ACON_MOUSE Aconitate hydratase_ mitochondrial OS=Mus musculus OX=10090 GN=Aco2 PE=1 SV=1
60.34_1499.7878n	2	#1622,#3684	2,3	60.3404	1499.79	7.3454	FKLEAPDADELPR		Q99KI0	ACON_MOUSE Aconitate hydratase_ mitochondrial OS=Mus musculus OX=10090 GN=Aco2 PE=1 SV=1
52.58_1504.7945n	1	#92859	3	52.5795	1504.79	6.3963	ATIERDGYAQILR		Q99KI0	ACON_MOUSE Aconitate hydratase_ mitochondrial OS=Mus musculus OX=10090 GN=Aco2 PE=1 SV=1
58.70_1564.7380n	1	#149497	3	58.6975	1564.74	6.52	VAMSHFEPSEYIR		Q99KI0	ACON_MOUSE Aconitate hydratase_ mitochondrial OS=Mus musculus OX=10090 GN=Aco2 PE=1 SV=1
56.31_1600.7858n	1	#1092	2	56.3123	1600.79	8.0417	NAVTQEFGPVPDTAR		Q99KI0	ACON_MOUSE Aconitate hydratase_ mitochondrial OS=Mus musculus OX=10090 GN=Aco2 PE=1 SV=1
55.92_1600.7879n	1	#12502	2	55.9244	1600.79	7.6441	NAVTQEFGPVPDTAR		Q99KI0	ACON_MOUSE Aconitate hydratase_ mitochondrial OS=Mus musculus OX=10090 GN=Aco2 PE=1 SV=1
42.12_1730.7602n	1	#39954	3	42.1153	1730.76	7.1317	SDFDPGQDTYQHPPK		Q99KI0	ACON_MOUSE Aconitate hydratase_ mitochondrial OS=Mus musculus OX=10090 GN=Aco2 PE=1 SV=1
42.60_1730.7609n	2	#32563,#7592	2,3	42.5957	1730.76	7.8139	SDFDPGQDTYQHPPK		Q99KI0	ACON_MOUSE Aconitate hydratase_ mitochondrial OS=Mus musculus OX=10090 GN=Aco2 PE=1 SV=1
59.87_1787.7806n	1	#124319	2	59.8729	1787.78	7.1101	VGLIGSCTNSSYEDMGR		Q99KI0	ACON_MOUSE Aconitate hydratase_ mitochondrial OS=Mus musculus OX=10090 GN=Aco2 PE=1 SV=1
60.53_1787.7852n	1	#51606	2	60.5259	1787.79	6.9391	VGLIGSCTNSSYEDMGR		Q99KI0	ACON_MOUSE Aconitate hydratase_ mitochondrial OS=Mus musculus OX=10090 GN=Aco2 PE=1 SV=1
51.33_1867.9084n	1	#17618	3	51.3255	1867.91	7.6315	IVYGHLDDPANQEIER		Q99KI0	ACON_MOUSE Aconitate hydratase_ mitochondrial OS=Mus musculus OX=10090 GN=Aco2 PE=1 SV=1
51.66_1867.9124n	1	#2700	3	51.6609	1867.91	7.9265	IVYGHLDDPANQEIER		Q99KI0	ACON_MOUSE Aconitate hydratase_ mitochondrial OS=Mus musculus OX=10090 GN=Aco2 PE=1 SV=1
42.22_1868.9022n	2	#86330,#70706	3,4	42.2182	1868.9	6.2913	IVYGHLDDPANQEIER	[11] Deamidation N	Q99KI0	ACON_MOUSE Aconitate hydratase_ mitochondrial OS=Mus musculus OX=10090 GN=Aco2 PE=1 SV=1
42.24_1868.9094n	1	#19946	4	42.2354	1868.91	6.2913	IVYGHLDDPANQEIER	[11] Deamidation N	Q99KI0	ACON_MOUSE Aconitate hydratase_ mitochondrial OS=Mus musculus OX=10090 GN=Aco2 PE=1 SV=1
61.01_2202.1047n	1	#110569	4	61.0071	2202.1	5.6467	VAVPSTIHCDHLIEAQVGGEK		Q99KI0	ACON_MOUSE Aconitate hydratase_ mitochondrial OS=Mus musculus OX=10090 GN=Aco2 PE=1 SV=1
38.99_2361.0223n	1	#60577	3	38.9923	2361.02	7.0509	SDFDPGQDTYQHPPKDSSGQR		Q99KI0	ACON_MOUSE Aconitate hydratase_ mitochondrial OS=Mus musculus OX=10090 GN=Aco2 PE=1 SV=1
39.22_2361.0297n	2	#31617,#10980	3,4	39.2154	2361.03	7.306	SDFDPGQDTYQHPPKDSSGQR		Q99KI0	ACON_MOUSE Aconitate hydratase_ mitochondrial OS=Mus musculus OX=10090 GN=Aco2 PE=1 SV=1
73.72_2745.4258n	1	#11266	4	73.7175	2745.43	7.5383	GHLDNISNNLLIGAINIENGKANSVR		Q99KI0	ACON_MOUSE Aconitate hydratase_ mitochondrial OS=Mus musculus OX=10090 GN=Aco2 PE=1 SV=1
73.67_2745.4427n	1	#8626	3	73.6745	2745.44	7.6677	GHLDNISNNLLIGAINIENGKANSVR		Q99KI0	ACON_MOUSE Aconitate hydratase_ mitochondrial OS=Mus musculus OX=10090 GN=Aco2 PE=1 SV=1
66.38_2974.5098n	1	#15946	4	66.3782	2974.51	6.3218	LRPDRVAMQDATAQMAMLQFISSGLPK		Q99KI0	ACON_MOUSE Aconitate hydratase_ mitochondrial OS=Mus musculus OX=10090 GN=Aco2 PE=1 SV=1
62.59_3019.5593n	1	#17903	4	62.5874	3019.56	6.5566	LNRPLTLSEKIVYGHLDDPANQEIER		Q99KI0	ACON_MOUSE Aconitate hydratase_ mitochondrial OS=Mus musculus OX=10090 GN=Aco2 PE=1 SV=1
62.81_3019.5647n	1	#158089	4	62.8129	3019.56	5.975	LNRPLTLSEKIVYGHLDDPANQEIER		Q99KI0	ACON_MOUSE Aconitate hydratase_ mitochondrial OS=Mus musculus OX=10090 GN=Aco2 PE=1 SV=1
59.82_733.3395n	2	#584,#15540	1,2	59.8168	733.34	7.6542	CDIDIR		P68033	ACTC_MOUSE Actin_ alpha cardiac muscle 1 OS=Mus musculus OX=10090 GN=Actc1 PE=1 SV=1
59.81_733.3416n	1	#153155	1	59.8056	733.342	7.6542	CDIDIR		P68033	ACTC_MOUSE Actin_ alpha cardiac muscle 1 OS=Mus musculus OX=10090 GN=Actc1 PE=1 SV=1
59.83_733.3421n	1	#3552	1	59.828	733.342	7.6542	CDIDIR		P68033	ACTC_MOUSE Actin_ alpha cardiac muscle 1 OS=Mus musculus OX=10090 GN=Actc1 PE=1 SV=1
48.09_733.3427n	1	#124467	1	48.0878	733.343	7.386	CDIDIR		P68033	ACTC_MOUSE Actin_ alpha cardiac muscle 1 OS=Mus musculus OX=10090 GN=Actc1 PE=1 SV=1
36.52_975.4418n	1	#3112	2	36.5215	975.442	8.3081	AGFAGDDAPR		P68033	ACTC_MOUSE Actin_ alpha cardiac muscle 1 OS=Mus musculus OX=10090 GN=Actc1 PE=1 SV=1
35.48_975.4427n	1	#11310	2	35.4806	975.443	8.4669	AGFAGDDAPR		P68033	ACTC_MOUSE Actin_ alpha cardiac muscle 1 OS=Mus musculus OX=10090 GN=Actc1 PE=1 SV=1
36.01_975.4432n	1	#7127	2	36.0069	975.443	8.1228	AGFAGDDAPR		P68033	ACTC_MOUSE Actin_ alpha cardiac muscle 1 OS=Mus musculus OX=10090 GN=Actc1 PE=1 SV=1
35.15_975.4434n	1	#9635	2	35.1546	975.443	8.4512	AGFAGDDAPR		P68033	ACTC_MOUSE Actin_ alpha cardiac muscle 1 OS=Mus musculus OX=10090 GN=Actc1 PE=1 SV=1
36.97_975.4439n	1	#141233	2	36.9676	975.444	7.8791	AGFAGDDAPR		P68033	ACTC_MOUSE Actin_ alpha cardiac muscle 1 OS=Mus musculus OX=10090 GN=Actc1 PE=1 SV=1
53.25_1160.6140n	1	#1074	2	53.2465	1160.61	8.8208	EITALAPSTMK		P68033	ACTC_MOUSE Actin_ alpha cardiac muscle 1 OS=Mus musculus OX=10090 GN=Actc1 PE=1 SV=1
37.22_1170.5633n	1	#60992	2	37.2193	1170.56	7.9886	HQGVMVGMGQK		P68033	ACTC_MOUSE Actin_ alpha cardiac muscle 1 OS=Mus musculus OX=10090 GN=Actc1 PE=1 SV=1
37.80_1170.5646n	1	#18034	2	37.8027	1170.56	7.959	HQGVMVGMGQK		P68033	ACTC_MOUSE Actin_ alpha cardiac muscle 1 OS=Mus musculus OX=10090 GN=Actc1 PE=1 SV=1
36.93_1170.5662n	1	#67469	2	36.9333	1170.57	7.7226	HQGVMVGMGQK		P68033	ACTC_MOUSE Actin_ alpha cardiac muscle 1 OS=Mus musculus OX=10090 GN=Actc1 PE=1 SV=1
37.49_1170.5666n	1	#54531	2	37.4939	1170.57	7.9629	HQGVMVGMGQK		P68033	ACTC_MOUSE Actin_ alpha cardiac muscle 1 OS=Mus musculus OX=10090 GN=Actc1 PE=1 SV=1
55.86_1197.6984n	2	#40657,#4348	2,3	55.8624	1197.7	8.2696	AVFPSIVGRPR		P68033	ACTC_MOUSE Actin_ alpha cardiac muscle 1 OS=Mus musculus OX=10090 GN=Actc1 PE=1 SV=1
55.74_1197.7076n	1	#52	2	55.7389	1197.71	8.2696	AVFPSIVGRPR		P68033	ACTC_MOUSE Actin_ alpha cardiac muscle 1 OS=Mus musculus OX=10090 GN=Actc1 PE=1 SV=1
49.44_1514.7423n	1	#20341	3	49.4434	1514.74	7.0599	IWHHTFYNELR		P68033	ACTC_MOUSE Actin_ alpha cardiac muscle 1 OS=Mus musculus OX=10090 GN=Actc1 PE=1 SV=1
49.53_1514.7509n	1	#49796	2	49.5294	1514.75	7.0599	IWHHTFYNELR		P68033	ACTC_MOUSE Actin_ alpha cardiac muscle 1 OS=Mus musculus OX=10090 GN=Actc1 PE=1 SV=1
51.16_1547.8053n	1	#2284	2	51.158	1547.81	8.7947	MQKEITALAPSTMK		P68033	ACTC_MOUSE Actin_ alpha cardiac muscle 1 OS=Mus musculus OX=10090 GN=Actc1 PE=1 SV=1
51.18_1547.8092n	1	#1696	3	51.178	1547.81	8.7947	MQKEITALAPSTMK		P68033	ACTC_MOUSE Actin_ alpha cardiac muscle 1 OS=Mus musculus OX=10090 GN=Actc1 PE=1 SV=1
70.35_1789.8868n	1	#194	2	70.3509	1789.89	8.6284	SYELPDGQVITIGNER		P68033	ACTC_MOUSE Actin_ alpha cardiac muscle 1 OS=Mus musculus OX=10090 GN=Actc1 PE=1 SV=1
69.95_2093.0527n	2	#17180,#4284	2,3	69.9493	2093.05	8.3299	SYELPDGQVITIGNERFR		P68033	ACTC_MOUSE Actin_ alpha cardiac muscle 1 OS=Mus musculus OX=10090 GN=Actc1 PE=1 SV=1
63.75_2155.1232n	1	#6273	3	63.7465	2155.12	8.812	AGFAGDDAPRAVFPSIVGRPR		P68033	ACTC_MOUSE Actin_ alpha cardiac muscle 1 OS=Mus musculus OX=10090 GN=Actc1 PE=1 SV=1
63.31_2155.1284n	3	#7095,#238,#215	2,3,4	63.3091	2155.13	8.9308	AGFAGDDAPRAVFPSIVGRPR		P68033	ACTC_MOUSE Actin_ alpha cardiac muscle 1 OS=Mus musculus OX=10090 GN=Actc1 PE=1 SV=1
44.70_2350.0708n	2	#1024,#2407	3,4	44.7035	2350.07	8.8494	HQGVMVGMGQKDSYVGDEAQSK		P68033	ACTC_MOUSE Actin_ alpha cardiac muscle 1 OS=Mus musculus OX=10090 GN=Actc1 PE=1 SV=1
44.21_2350.0717n	1	#4788	3	44.2145	2350.07	8.849	HQGVMVGMGQKDSYVGDEAQSK		P68033	ACTC_MOUSE Actin_ alpha cardiac muscle 1 OS=Mus musculus OX=10090 GN=Actc1 PE=1 SV=1
44.27_2350.0725n	1	#10364	4	44.266	2350.07	8.849	HQGVMVGMGQKDSYVGDEAQSK		P68033	ACTC_MOUSE Actin_ alpha cardiac muscle 1 OS=Mus musculus OX=10090 GN=Actc1 PE=1 SV=1
55.72_2350.2533n	1	#1999	4	55.718	2350.25	7.8661	AVFPSIVGRPRHQGVMVGMGQK		P68033	ACTC_MOUSE Actin_ alpha cardiac muscle 1 OS=Mus musculus OX=10090 GN=Actc1 PE=1 SV=1
40.96_2366.0618n	1	#107380	3	40.9599	2366.06	7.626	HQGVMVGMGQKDSYVGDEAQSK	[5] Oxidation M	P68033	ACTC_MOUSE Actin_ alpha cardiac muscle 1 OS=Mus musculus OX=10090 GN=Actc1 PE=1 SV=1
39.13_2366.0621n	1	#42400	3	39.1296	2366.06	8.0413	HQGVMVGMGQKDSYVGDEAQSK	[8] Oxidation M	P68033	ACTC_MOUSE Actin_ alpha cardiac muscle 1 OS=Mus musculus OX=10090 GN=Actc1 PE=1 SV=1
41.41_2366.0637n	2	#30391,#46698	3,4	41.4089	2366.06	7.8302	HQGVMVGMGQKDSYVGDEAQSK	[5] Oxidation M	P68033	ACTC_MOUSE Actin_ alpha cardiac muscle 1 OS=Mus musculus OX=10090 GN=Actc1 PE=1 SV=1
44.68_2382.0549n	1	#55826	3	44.6778	2382.05	7.4206	HQGVMVGMGQKDSYVGDEAQSK	[5] Oxidation M|[8] Oxidation M	P68033	ACTC_MOUSE Actin_ alpha cardiac muscle 1 OS=Mus musculus OX=10090 GN=Actc1 PE=1 SV=1
45.74_1002.5093n	1	#218088	1	45.7363	1002.51	6.5527	AGFAGDQIPK		P61164	ACTZ_MOUSE Alpha-centractin OS=Mus musculus OX=10090 GN=Actr1a PE=1 SV=1
46.14_1002.5157n	2	#78621,#4325	1,2	46.1427	1002.52	6.6846	AGFAGDQIPK		P61164	ACTZ_MOUSE Alpha-centractin OS=Mus musculus OX=10090 GN=Actr1a PE=1 SV=1
46.37_1002.5191n	1	#30234	2	46.3657	1002.52	6.3894	AGFAGDQIPK		P61164	ACTZ_MOUSE Alpha-centractin OS=Mus musculus OX=10090 GN=Actr1a PE=1 SV=1
85.03_1839.0174n	1	#140319	3	85.0275	1839.02	5.3036	RTLFSNIVLSGGSTLFK		P61164	ACTZ_MOUSE Alpha-centractin OS=Mus musculus OX=10090 GN=Actr1a PE=1 SV=1
84.81_1971.0340n	1	#43404	2	84.8102	1971.03	5.6022	LYSTWIGGSILASLDTFK		P61164	ACTZ_MOUSE Alpha-centractin OS=Mus musculus OX=10090 GN=Actr1a PE=1 SV=1
54.11_2018.9208n	1	#31993	4	54.1062	2018.92	5.361	YPMEHGIVKDWNDMER		P61164	ACTZ_MOUSE Alpha-centractin OS=Mus musculus OX=10090 GN=Actr1a PE=1 SV=1
71.73_2347.2066n	1	#40	3	71.7322	2347.21	6.1612	MESYDVIANQPVVIDNGSGVIK		P61164	ACTZ_MOUSE Alpha-centractin OS=Mus musculus OX=10090 GN=Actr1a PE=1 SV=1
83.52_3156.5124n	2	#37602,#10877	3,4	83.5222	3156.51	5.6548	TTGVVLDSGDGVTHAVPIYEGFAMPHSIMR		P61164	ACTZ_MOUSE Alpha-centractin OS=Mus musculus OX=10090 GN=Actr1a PE=1 SV=1
46.83_1726.8548n	1	#47749	2	46.829	1726.85	6.9061	SVSPPGYAAQTAASPAPR		P84309	ADCY5_MOUSE Adenylate cyclase type 5 OS=Mus musculus OX=10090 GN=Adcy5 PE=1 SV=2
47.12_1726.8581n	1	#19001	2	47.115	1726.86	7.0035	SVSPPGYAAQTAASPAPR		P84309	ADCY5_MOUSE Adenylate cyclase type 5 OS=Mus musculus OX=10090 GN=Adcy5 PE=1 SV=2
42.73_2136.0554n	1	#112309	2	42.7329	2136.06	7.6078	APPAGGSGSSAAAAAAAGGTEVRPR		P84309	ADCY5_MOUSE Adenylate cyclase type 5 OS=Mus musculus OX=10090 GN=Adcy5 PE=1 SV=2
42.65_2136.0653n	1	#1866	3	42.6472	2136.07	7.6078	APPAGGSGSSAAAAAAAGGTEVRPR		P84309	ADCY5_MOUSE Adenylate cyclase type 5 OS=Mus musculus OX=10090 GN=Adcy5 PE=1 SV=2
46.28_739.3933n	1	#127215	1	46.2799	739.393	6.1463	LAAFYR		Q9QYC0	ADDA_MOUSE Alpha-adducin OS=Mus musculus OX=10090 GN=Add1 PE=1 SV=2
46.24_739.3961n	2	#76992,#82331	1,2	46.237	739.396	6.7285	LAAFYR		Q9QYC0	ADDA_MOUSE Alpha-adducin OS=Mus musculus OX=10090 GN=Add1 PE=1 SV=2
46.25_739.3982n	1	#4468	2	46.2456	739.398	6.7285	LAAFYR		Q9QYC0	ADDA_MOUSE Alpha-adducin OS=Mus musculus OX=10090 GN=Add1 PE=1 SV=2
52.52_1152.4886n	1	#192458	2	52.5165	1152.49	0	YFDRVDENN		Q9QYC0	ADDA_MOUSE Alpha-adducin OS=Mus musculus OX=10090 GN=Add1 PE=1 SV=2
52.16_1230.6631n	1	#3184	2	52.1637	1230.66	7.1947	SLVQGELVTASK		Q9QYC0	ADDA_MOUSE Alpha-adducin OS=Mus musculus OX=10090 GN=Add1 PE=1 SV=2
51.86_1230.6759n	1	#9584	2	51.8607	1230.68	6.7753	SLVQGELVTASK		Q9QYC0	ADDA_MOUSE Alpha-adducin OS=Mus musculus OX=10090 GN=Add1 PE=1 SV=2
55.54_1717.8213n	1	#29117	3	55.5379	1717.82	5.5667	MLDNLGYRTGYPYR		Q9QYC0	ADDA_MOUSE Alpha-adducin OS=Mus musculus OX=10090 GN=Add1 PE=1 SV=2
55.54_1717.8218n	1	#10487	3	55.5379	1717.82	5.5667	MLDNLGYRTGYPYR		Q9QYC0	ADDA_MOUSE Alpha-adducin OS=Mus musculus OX=10090 GN=Add1 PE=1 SV=2
43.36_1827.0342n	2	#135859,#17072	2,3	43.3621	1827.03	4.8445	SLVQGELVTASKAIIEK	[N-term] Acetyl N-TERM	Q9QYC0	ADDA_MOUSE Alpha-adducin OS=Mus musculus OX=10090 GN=Add1 PE=1 SV=2
52.63_1828.8453n	2	#16805,#6789	2,3	52.632	1828.85	7.4423	YFDRVDENNPEYLR		Q9QYC0	ADDA_MOUSE Alpha-adducin OS=Mus musculus OX=10090 GN=Add1 PE=1 SV=2
52.15_1828.8460n	1	#24168	3	52.1454	1828.85	7.1878	YFDRVDENNPEYLR		Q9QYC0	ADDA_MOUSE Alpha-adducin OS=Mus musculus OX=10090 GN=Add1 PE=1 SV=2
76.58_1899.0016n	1	#7060	2	76.5831	1899	7.0063	TSTSAVPNLFVPLNTNPK		Q9QYC0	ADDA_MOUSE Alpha-adducin OS=Mus musculus OX=10090 GN=Add1 PE=1 SV=2
76.18_1899.0122n	2	#71986,#123540	2,3	76.1841	1899.01	7.038	TSTSAVPNLFVPLNTNPK		Q9QYC0	ADDA_MOUSE Alpha-adducin OS=Mus musculus OX=10090 GN=Add1 PE=1 SV=2
51.79_2075.0495n	1	#42586	3	51.7876	2075.05	5.3596	EKSPPDQSAVPNTPPSTPVK		Q9QYC0	ADDA_MOUSE Alpha-adducin OS=Mus musculus OX=10090 GN=Add1 PE=1 SV=2
38.35_2147.0686n	1	#103950	5	38.346	2147.07	5.5688	MNGDTRAAVVTSPPPTTAPHK		Q9QYC0	ADDA_MOUSE Alpha-adducin OS=Mus musculus OX=10090 GN=Add1 PE=1 SV=2
75.44_2671.3395n	1	#55956	3	75.4404	2671.34	6.6053	TSTSAVPNLFVPLNTNPKEVQEMR		Q9QYC0	ADDA_MOUSE Alpha-adducin OS=Mus musculus OX=10090 GN=Add1 PE=1 SV=2
75.03_2671.3613n	1	#6732	3	75.0344	2671.36	7.0187	TSTSAVPNLFVPLNTNPKEVQEMR		Q9QYC0	ADDA_MOUSE Alpha-adducin OS=Mus musculus OX=10090 GN=Add1 PE=1 SV=2
57.05_2947.4529n	1	#37252	4	57.0482	2947.45	5.3851	TAGPQSQVLCGVMMDRSLVQGELVTASK	[N-term] Acetyl N-TERM|[20] Deamidation Q	Q9QYC0	ADDA_MOUSE Alpha-adducin OS=Mus musculus OX=10090 GN=Add1 PE=1 SV=2
56.40_2968.3499n	1	#88792	3	56.4023	2968.35	5.7215	KYSDVEVPASVTGHSFASDGDSGTCSPLR		Q9QYC0	ADDA_MOUSE Alpha-adducin OS=Mus musculus OX=10090 GN=Add1 PE=1 SV=2
63.26_3212.5907n	1	#41951	3	63.2636	3212.59	6.5263	SPPDQSAVPNTPPSTPVKLEEDLPQEPTSR		Q9QYC0	ADDA_MOUSE Alpha-adducin OS=Mus musculus OX=10090 GN=Add1 PE=1 SV=2
46.11_840.4443n	2	#190257,#30768	1,2	46.1084	840.444	5.1715	TALFYAR		Q3UHD9	AGAP2_MOUSE Arf-GAP with GTPase_ ANK repeat and PH domain-containing protein 2 OS=Mus musculus OX=10090 GN=Agap2 PE=1 SV=1
56.27_1388.6957n	1	#11890	2	56.2673	1388.7	6.3662	AVVNSQEWTLSR		Q3UHD9	AGAP2_MOUSE Arf-GAP with GTPase_ ANK repeat and PH domain-containing protein 2 OS=Mus musculus OX=10090 GN=Agap2 PE=1 SV=1
70.85_1530.8248n	1	#14321	2	70.8462	1530.82	6.5195	AISAFGPSASINGLVK		Q3UHD9	AGAP2_MOUSE Arf-GAP with GTPase_ ANK repeat and PH domain-containing protein 2 OS=Mus musculus OX=10090 GN=Agap2 PE=1 SV=1
50.95_1606.8425n	1	#22773	3	50.9487	1606.84	7.1424	AEAAAVAGLSTPGSLHR		Q3UHD9	AGAP2_MOUSE Arf-GAP with GTPase_ ANK repeat and PH domain-containing protein 2 OS=Mus musculus OX=10090 GN=Agap2 PE=1 SV=1
51.03_1606.8559n	1	#6046	2	51.0294	1606.86	7.1424	AEAAAVAGLSTPGSLHR		Q3UHD9	AGAP2_MOUSE Arf-GAP with GTPase_ ANK repeat and PH domain-containing protein 2 OS=Mus musculus OX=10090 GN=Agap2 PE=1 SV=1
39.61_1745.8709n	1	#1205	3	39.6101	1745.87	5.5888	LSTPSKTEGSAVQAEAK	[N-term] Acetyl N-TERM|[13] Deamidation Q	Q3UHD9	AGAP2_MOUSE Arf-GAP with GTPase_ ANK repeat and PH domain-containing protein 2 OS=Mus musculus OX=10090 GN=Agap2 PE=1 SV=1
46.01_1990.0269n	1	#94377	3	46.0054	1990.03	4.9163	VAPPPPAPKPFKTVTTSGAK		Q3UHD9	AGAP2_MOUSE Arf-GAP with GTPase_ ANK repeat and PH domain-containing protein 2 OS=Mus musculus OX=10090 GN=Agap2 PE=1 SV=1
55.86_2133.0420n	1	#94897	2	55.8619	2133.04	7.0832	STGGPPGPGPLPGPQGLSSSSGSR		Q3UHD9	AGAP2_MOUSE Arf-GAP with GTPase_ ANK repeat and PH domain-containing protein 2 OS=Mus musculus OX=10090 GN=Agap2 PE=1 SV=1
75.70_3014.5278n	1	#193552	4	75.7027	3014.53	5.9207	STGGPPGPGPLPGPQGLSSSSGSRELLGAELR		Q3UHD9	AGAP2_MOUSE Arf-GAP with GTPase_ ANK repeat and PH domain-containing protein 2 OS=Mus musculus OX=10090 GN=Agap2 PE=1 SV=1
86.64_3371.5565n	1	#10627	5	86.6355	3371.56	5.6487	GNSTCVDCGAPNPTWASLNLGALICIECSGIHR		Q3UHD9	AGAP2_MOUSE Arf-GAP with GTPase_ ANK repeat and PH domain-containing protein 2 OS=Mus musculus OX=10090 GN=Agap2 PE=1 SV=1
53.52_387.2227n	1	#56475	1	53.516	387.223	0	AAAR		P46660	AINX_MOUSE Alpha-internexin OS=Mus musculus OX=10090 GN=Ina PE=1 SV=3
53.45_515.2750n	1	#12120	1	53.4451	515.275	0	QAAAR		P46660	AINX_MOUSE Alpha-internexin OS=Mus musculus OX=10090 GN=Ina PE=1 SV=3
53.49_602.3136n	1	#18037	1	53.4923	602.314	0	SQAAAR		P46660	AINX_MOUSE Alpha-internexin OS=Mus musculus OX=10090 GN=Ina PE=1 SV=3
73.16_803.4372n	1	#32424	1	73.1573	803.437	0	GEAVISTK		P46660	AINX_MOUSE Alpha-internexin OS=Mus musculus OX=10090 GN=Ina PE=1 SV=3
53.49_809.4394n	1	#129224	2	53.4923	809.439	0	RLPASDGL		P46660	AINX_MOUSE Alpha-internexin OS=Mus musculus OX=10090 GN=Ina PE=1 SV=3
47.42_847.4555n	1	#23463	2	47.4239	847.455	7.8694	VGELFQR		P46660	AINX_MOUSE Alpha-internexin OS=Mus musculus OX=10090 GN=Ina PE=1 SV=3
87.77_889.4307n	1	#5418	1	87.7663	889.431	6.2122	VGELFQR	[N-term] Acetyl N-TERM	P46660	AINX_MOUSE Alpha-internexin OS=Mus musculus OX=10090 GN=Ina PE=1 SV=3
40.26_1015.5021n	1	#37984	2	40.2564	1015.5	7.7102	DGLAEEVQR		P46660	AINX_MOUSE Alpha-internexin OS=Mus musculus OX=10090 GN=Ina PE=1 SV=3
40.56_1015.5034n	2	#81425,#12181	1,2	40.5567	1015.5	7.8044	DGLAEEVQR		P46660	AINX_MOUSE Alpha-internexin OS=Mus musculus OX=10090 GN=Ina PE=1 SV=3
41.14_1132.5654n	1	#6293	2	41.1429	1132.57	7.7211	FANLNEQAAR		P46660	AINX_MOUSE Alpha-internexin OS=Mus musculus OX=10090 GN=Ina PE=1 SV=3
53.80_1266.5976n	1	#9945	2	53.8021	1266.6	7.2341	NLQSAEEWYK		P46660	AINX_MOUSE Alpha-internexin OS=Mus musculus OX=10090 GN=Ina PE=1 SV=3
57.85_1339.7544n	1	#171272	3	57.8485	1339.75	6.4688	ALEAELAALRQR		P46660	AINX_MOUSE Alpha-internexin OS=Mus musculus OX=10090 GN=Ina PE=1 SV=3
57.26_1483.7614n	1	#2105	2	57.2563	1483.76	7.7641	LPASDGLDLSQAAAR		P46660	AINX_MOUSE Alpha-internexin OS=Mus musculus OX=10090 GN=Ina PE=1 SV=3
46.14_1524.7748n	2	#35350,#3840	2,3	46.1427	1524.77	7.5448	HAEPSRVGELFQR		P46660	AINX_MOUSE Alpha-internexin OS=Mus musculus OX=10090 GN=Ina PE=1 SV=3
53.49_1639.8639n	2	#2748,#8483	2,3	53.4923	1639.86	8.1932	RLPASDGLDLSQAAAR		P46660	AINX_MOUSE Alpha-internexin OS=Mus musculus OX=10090 GN=Ina PE=1 SV=3
54.06_1647.9559n	1	#21905	4	54.0593	1647.96	5.9981	ILSSTASKVSSAGLSLK		P46660	AINX_MOUSE Alpha-internexin OS=Mus musculus OX=10090 GN=Ina PE=1 SV=3
60.82_1734.7313n	1	#5662	2	60.8247	1734.73	7.7122	SFGSEHYLCSASSYR	[N-term] Acetyl N-TERM	P46660	AINX_MOUSE Alpha-internexin OS=Mus musculus OX=10090 GN=Ina PE=1 SV=3
73.16_1764.8810n	2	#195,#12385	2,3	73.1573	1764.88	8.3551	VGEGFEETLGEAVISTK		P46660	AINX_MOUSE Alpha-internexin OS=Mus musculus OX=10090 GN=Ina PE=1 SV=3
72.39_1764.8848n	2	#2881,#39646	2,3	72.3922	1764.88	8.465	VGEGFEETLGEAVISTK		P46660	AINX_MOUSE Alpha-internexin OS=Mus musculus OX=10090 GN=Ina PE=1 SV=3
57.50_1785.9141n	1	#117833	2	57.4959	1785.91	7.293	TIEIEGLRGANESLER		P46660	AINX_MOUSE Alpha-internexin OS=Mus musculus OX=10090 GN=Ina PE=1 SV=3
57.28_1785.9217n	1	#17797	2	57.2793	1785.92	7.2119	TIEIEGLRGANESLER		P46660	AINX_MOUSE Alpha-internexin OS=Mus musculus OX=10090 GN=Ina PE=1 SV=3
57.33_1785.9346n	1	#172901	3	57.3344	1785.93	7.2119	TIEIEGLRGANESLER		P46660	AINX_MOUSE Alpha-internexin OS=Mus musculus OX=10090 GN=Ina PE=1 SV=3
53.86_1796.9290n	2	#39741,#15994	2,3	53.8607	1796.93	7.2661	AQALLERDGLAEEVQR		P46660	AINX_MOUSE Alpha-internexin OS=Mus musculus OX=10090 GN=Ina PE=1 SV=3
65.99_1892.9715n	2	#29710,#1340	2,3	65.9878	1892.97	8.396	VGEGFEETLGEAVISTKK		P46660	AINX_MOUSE Alpha-internexin OS=Mus musculus OX=10090 GN=Ina PE=1 SV=3
66.61_1892.9726n	2	#3174,#163	2,3	66.6108	1892.97	8.5414	VGEGFEETLGEAVISTKK		P46660	AINX_MOUSE Alpha-internexin OS=Mus musculus OX=10090 GN=Ina PE=1 SV=3
72.54_1905.9848n	1	#207082	3	72.5362	1905.98	6.5849	EQLQGLNDRFAVFIEK		P46660	AINX_MOUSE Alpha-internexin OS=Mus musculus OX=10090 GN=Ina PE=1 SV=3
66.80_2081.0452n	2	#16768,#6919	2,3	66.7966	2081.05	8.0405	TSKVGEGFEETLGEAVISTK		P46660	AINX_MOUSE Alpha-internexin OS=Mus musculus OX=10090 GN=Ina PE=1 SV=3
69.51_2085.0149n	1	#71683	2	69.5117	2085.01	7.5427	SNVASTAACSSASSLGLGLAYR		P46660	AINX_MOUSE Alpha-internexin OS=Mus musculus OX=10090 GN=Ina PE=1 SV=3
67.92_2496.2953n	1	#68258	4	67.9218	2496.3	5.6078	FSTGGLSISGLNPLPNPSYLLPPR		P46660	AINX_MOUSE Alpha-internexin OS=Mus musculus OX=10090 GN=Ina PE=1 SV=3
79.40_4343.3086n	1	#14041	5	79.4047	4343.31	6.6004	QVHDEEVAELLATLQASSQAAAEVDVAVAKPDLTSALREIR		P46660	AINX_MOUSE Alpha-internexin OS=Mus musculus OX=10090 GN=Ina PE=1 SV=3
40.46_1038.4914n	1	#150597	2	40.4623	1038.49	5.812	LTEDSGYVR		D3YVF0	AKAP5_MOUSE A-kinase anchor protein 5 OS=Mus musculus OX=10090 GN=Akap5 PE=1 SV=2
45.12_1244.6300n	1	#10998	2	45.1182	1244.63	7.448	ASLLESSAAGSPR		D3YVF0	AKAP5_MOUSE A-kinase anchor protein 5 OS=Mus musculus OX=10090 GN=Akap5 PE=1 SV=2
45.58_1244.6370n	1	#4662	2	45.5818	1244.64	7.8125	ASLLESSAAGSPR		D3YVF0	AKAP5_MOUSE A-kinase anchor protein 5 OS=Mus musculus OX=10090 GN=Akap5 PE=1 SV=2
36.47_1374.6838n	1	#182386	2	36.4701	1374.68	7.0722	LSQAEETTVAQAK		D3YVF0	AKAP5_MOUSE A-kinase anchor protein 5 OS=Mus musculus OX=10090 GN=Akap5 PE=1 SV=2
38.93_1688.8521n	1	#83671	2	38.9294	1688.85	7.1112	EGKLSQAEETTVAQAK		D3YVF0	AKAP5_MOUSE A-kinase anchor protein 5 OS=Mus musculus OX=10090 GN=Akap5 PE=1 SV=2
38.44_1688.8555n	2	#169169,#47198	2,3	38.4404	1688.86	7.6868	EGKLSQAEETTVAQAK		D3YVF0	AKAP5_MOUSE A-kinase anchor protein 5 OS=Mus musculus OX=10090 GN=Akap5 PE=1 SV=2
38.90_1688.8603n	1	#22803	3	38.8951	1688.86	7.1112	EGKLSQAEETTVAQAK		D3YVF0	AKAP5_MOUSE A-kinase anchor protein 5 OS=Mus musculus OX=10090 GN=Akap5 PE=1 SV=2
44.57_1716.8659n	1	#106947	2	44.5748	1716.87	6.2973	ETVLSQAKEGELSQAK		D3YVF0	AKAP5_MOUSE A-kinase anchor protein 5 OS=Mus musculus OX=10090 GN=Akap5 PE=1 SV=2
36.64_1826.9055n	1	#146924	3	36.6416	1826.91	7.2177	KATVGQAEEATIDHTEK		D3YVF0	AKAP5_MOUSE A-kinase anchor protein 5 OS=Mus musculus OX=10090 GN=Akap5 PE=1 SV=2
37.27_1826.9062n	1	#66157	3	37.2708	1826.91	7.1056	KATVGQAEEATIDHTEK		D3YVF0	AKAP5_MOUSE A-kinase anchor protein 5 OS=Mus musculus OX=10090 GN=Akap5 PE=1 SV=2
56.89_1830.8640n	1	#28141	2	56.8896	1830.86	7.1823	SGETALGQAEEAAVGQADK		D3YVF0	AKAP5_MOUSE A-kinase anchor protein 5 OS=Mus musculus OX=10090 GN=Akap5 PE=1 SV=2
54.15_1986.9650n	2	#20297,#2156	2,3	54.1534	1986.97	7.7563	SGETALGQAEEAAVGQADKR		D3YVF0	AKAP5_MOUSE A-kinase anchor protein 5 OS=Mus musculus OX=10090 GN=Akap5 PE=1 SV=2
45.79_2105.0670n	1	#13908	3	45.7878	2105.07	6.8434	HTPEAGGSGQRQPAGAWASIK		D3YVF0	AKAP5_MOUSE A-kinase anchor protein 5 OS=Mus musculus OX=10090 GN=Akap5 PE=1 SV=2
54.20_2468.1687n	1	#20810	3	54.2009	2468.17	7.675	VTVDHAEEATVGQAEEATVGQAEK		D3YVF0	AKAP5_MOUSE A-kinase anchor protein 5 OS=Mus musculus OX=10090 GN=Akap5 PE=1 SV=2
54.73_2468.1688n	1	#4170	3	54.7254	2468.17	7.8388	VTVDHAEEATVGQAEEATVGQAEK		D3YVF0	AKAP5_MOUSE A-kinase anchor protein 5 OS=Mus musculus OX=10090 GN=Akap5 PE=1 SV=2
60.76_2498.1510n	1	#6865	3	60.756	2498.15	6.3314	VTVDQAEEATVGQAEEATVGHTEK		D3YVF0	AKAP5_MOUSE A-kinase anchor protein 5 OS=Mus musculus OX=10090 GN=Akap5 PE=1 SV=2
60.25_2498.1718n	1	#34134	3	60.2484	2498.17	7.0536	VTVDQAEEATVGQAEEATVGHTEK		D3YVF0	AKAP5_MOUSE A-kinase anchor protein 5 OS=Mus musculus OX=10090 GN=Akap5 PE=1 SV=2
49.83_2593.2611n	1	#22272	3	49.8255	2593.26	8.1313	ALSQAGEATAGHPEEATVIQAESQAK		D3YVF0	AKAP5_MOUSE A-kinase anchor protein 5 OS=Mus musculus OX=10090 GN=Akap5 PE=1 SV=2
50.19_2593.2681n	1	#1571	3	50.1879	2593.27	8.0569	ALSQAGEATAGHPEEATVIQAESQAK		D3YVF0	AKAP5_MOUSE A-kinase anchor protein 5 OS=Mus musculus OX=10090 GN=Akap5 PE=1 SV=2
46.52_2670.2972n	1	#45820	5	46.5201	2670.3	5.5726	SVTSAAPPSPATTHQHSLEEPSNGIR		D3YVF0	AKAP5_MOUSE A-kinase anchor protein 5 OS=Mus musculus OX=10090 GN=Akap5 PE=1 SV=2
46.62_2671.3292n	1	#28289	3	46.6231	2671.33	6.9081	SVTSAAPPSPATTHQHSLEEPSNGIR	[23] Deamidation N	D3YVF0	AKAP5_MOUSE A-kinase anchor protein 5 OS=Mus musculus OX=10090 GN=Akap5 PE=1 SV=2
48.86_2907.4142n	1	#68314	4	48.8628	2907.41	6.9772	ALSQAGEATAGHPEEATVIQAESQAKEGK		D3YVF0	AKAP5_MOUSE A-kinase anchor protein 5 OS=Mus musculus OX=10090 GN=Akap5 PE=1 SV=2
64.47_3115.5807n	1	#44830	4	64.4679	3115.58	6.6256	LSQAEETTVAQAKETVLSQAKEGELSQAK	[N-term] Acetyl N-TERM	D3YVF0	AKAP5_MOUSE A-kinase anchor protein 5 OS=Mus musculus OX=10090 GN=Akap5 PE=1 SV=2
69.68_3511.6478n	1	#6074	4	69.6789	3511.65	7.1179	EATVVGQAEEATVDRAEEATVGQAEEATVGHTEK		D3YVF0	AKAP5_MOUSE A-kinase anchor protein 5 OS=Mus musculus OX=10090 GN=Akap5 PE=1 SV=2
69.07_3511.6538n	1	#36252	4	69.0743	3511.65	7.0471	EATVVGQAEEATVDRAEEATVGQAEEATVGHTEK		D3YVF0	AKAP5_MOUSE A-kinase anchor protein 5 OS=Mus musculus OX=10090 GN=Akap5 PE=1 SV=2
48.65_502.2756n	1	#114932	2	48.6546	502.276	0	ENIK		P47740	AL3A2_MOUSE Aldehyde dehydrogenase family 3 member A2 OS=Mus musculus OX=10090 GN=Aldh3a2 PE=1 SV=2
46.25_789.4716n	1	#33356	2	46.2456	789.472	4.3402	LRQAFR		P47740	AL3A2_MOUSE Aldehyde dehydrogenase family 3 member A2 OS=Mus musculus OX=10090 GN=Aldh3a2 PE=1 SV=2
57.78_1263.7183n	1	#948	2	57.7847	1263.72	5.7395	HLTPVTLELGGK		P47740	AL3A2_MOUSE Aldehyde dehydrogenase family 3 member A2 OS=Mus musculus OX=10090 GN=Aldh3a2 PE=1 SV=2
49.37_1682.8327n	1	#74286	2	49.3746	1682.83	5.2684	IKETVKDFYGENIK		P47740	AL3A2_MOUSE Aldehyde dehydrogenase family 3 member A2 OS=Mus musculus OX=10090 GN=Aldh3a2 PE=1 SV=2
56.36_283.1898n	1	#19353	1	56.3568	283.19	0	IVA		P05064	ALDOA_MOUSE Fructose-bisphosphate aldolase A OS=Mus musculus OX=10090 GN=Aldoa PE=1 SV=2
56.36_474.2797n	1	#31794	1	56.3568	474.28	0	GSIAK		P05064	ALDOA_MOUSE Fructose-bisphosphate aldolase A OS=Mus musculus OX=10090 GN=Aldoa PE=1 SV=2
43.29_500.2592n	1	#121117	2	43.2934	500.259	0	PEQK		P05064	ALDOA_MOUSE Fructose-bisphosphate aldolase A OS=Mus musculus OX=10090 GN=Aldoa PE=1 SV=2
43.34_500.2597n	1	#9337	1	43.3449	500.26	0	PEQK		P05064	ALDOA_MOUSE Fructose-bisphosphate aldolase A OS=Mus musculus OX=10090 GN=Aldoa PE=1 SV=2
46.31_583.3685n	1	#84916	2	46.3143	583.368	7.145	IVAPGK		P05064	ALDOA_MOUSE Fructose-bisphosphate aldolase A OS=Mus musculus OX=10090 GN=Aldoa PE=1 SV=2
56.36_919.5861n	1	#54258	2	56.3568	919.586	0	IVAPGKGILA		P05064	ALDOA_MOUSE Fructose-bisphosphate aldolase A OS=Mus musculus OX=10090 GN=Aldoa PE=1 SV=2
40.94_970.5706n	1	#156520	2	40.9427	970.571	6.6159	GGVVGIKVDK		P05064	ALDOA_MOUSE Fructose-bisphosphate aldolase A OS=Mus musculus OX=10090 GN=Aldoa PE=1 SV=2
49.51_1064.5149n	1	#8829	2	49.5122	1064.51	7.9784	DGADFAKWR		P05064	ALDOA_MOUSE Fructose-bisphosphate aldolase A OS=Mus musculus OX=10090 GN=Aldoa PE=1 SV=2
49.13_1064.5178n	1	#4372	2	49.1335	1064.52	7.7374	DGADFAKWR		P05064	ALDOA_MOUSE Fructose-bisphosphate aldolase A OS=Mus musculus OX=10090 GN=Aldoa PE=1 SV=2
42.03_1074.5509n	1	#63050	2	42.0295	1074.55	7.4882	ALANSLACQGK		P05064	ALDOA_MOUSE Fructose-bisphosphate aldolase A OS=Mus musculus OX=10090 GN=Aldoa PE=1 SV=2
52.67_1299.7157n	1	#100376	2	52.6656	1299.72	6.884	ALQASALKAWGGK		P05064	ALDOA_MOUSE Fructose-bisphosphate aldolase A OS=Mus musculus OX=10090 GN=Aldoa PE=1 SV=2
50.89_1331.6989n	1	#762	2	50.8919	1331.7	8.3032	GILAADESTGSIAK		P05064	ALDOA_MOUSE Fructose-bisphosphate aldolase A OS=Mus musculus OX=10090 GN=Aldoa PE=1 SV=2
51.97_1341.7034n	2	#6597,#5111	2,3	51.9714	1341.7	7.9216	ADDGRPFPQVIK		P05064	ALDOA_MOUSE Fructose-bisphosphate aldolase A OS=Mus musculus OX=10090 GN=Aldoa PE=1 SV=2
43.19_1376.7095n	1	#22328	3	43.1905	1376.71	8.0424	PHPYPALTPEQK		P05064	ALDOA_MOUSE Fructose-bisphosphate aldolase A OS=Mus musculus OX=10090 GN=Aldoa PE=1 SV=2
46.09_1487.7925n	2	#3518,#8259	2,3	46.0912	1487.79	8.1774	GILAADESTGSIAKR		P05064	ALDOA_MOUSE Fructose-bisphosphate aldolase A OS=Mus musculus OX=10090 GN=Aldoa PE=1 SV=2
45.72_1487.7938n	2	#20949,#36594	2,3	45.7192	1487.79	8.0882	GILAADESTGSIAKR		P05064	ALDOA_MOUSE Fructose-bisphosphate aldolase A OS=Mus musculus OX=10090 GN=Aldoa PE=1 SV=2
37.56_1489.7012n	1	#57421	2	37.5625	1489.7	7.9119	LQSIGTENTEENR		P05064	ALDOA_MOUSE Fructose-bisphosphate aldolase A OS=Mus musculus OX=10090 GN=Aldoa PE=1 SV=2
54.51_1504.8324n	2	#60766,#18808	2,3	54.5057	1504.83	7.0355	ELSDIAHRIVAPGK		P05064	ALDOA_MOUSE Fructose-bisphosphate aldolase A OS=Mus musculus OX=10090 GN=Aldoa PE=1 SV=2
34.11_1645.8023n	1	#106056	3	34.1138	1645.8	6.7171	LQSIGTENTEENRR		P05064	ALDOA_MOUSE Fructose-bisphosphate aldolase A OS=Mus musculus OX=10090 GN=Aldoa PE=1 SV=2
70.66_1807.9231n	2	#7654,#730	2,3	70.6588	1807.92	8.2596	FSNEEIAMATVTALRR		P05064	ALDOA_MOUSE Fructose-bisphosphate aldolase A OS=Mus musculus OX=10090 GN=Aldoa PE=1 SV=2
56.09_1897.0527n	1	#12370	2	56.0852	1897.05	8.1886	IVAPGKGILAADESTGSIAK		P05064	ALDOA_MOUSE Fructose-bisphosphate aldolase A OS=Mus musculus OX=10090 GN=Aldoa PE=1 SV=2
56.36_1897.0538n	1	#992	2	56.3568	1897.05	8.4384	IVAPGKGILAADESTGSIAK		P05064	ALDOA_MOUSE Fructose-bisphosphate aldolase A OS=Mus musculus OX=10090 GN=Aldoa PE=1 SV=2
56.38_1897.0601n	1	#84	3	56.3795	1897.06	8.4384	IVAPGKGILAADESTGSIAK		P05064	ALDOA_MOUSE Fructose-bisphosphate aldolase A OS=Mus musculus OX=10090 GN=Aldoa PE=1 SV=2
76.31_2106.0870n	2	#31456,#6965	2,3	76.315	2106.09	7.8184	IGEHTPSALAIMENANVLAR		P05064	ALDOA_MOUSE Fructose-bisphosphate aldolase A OS=Mus musculus OX=10090 GN=Aldoa PE=1 SV=2
66.01_2271.1336n	2	#12193,#2702	2,3	66.0111	2271.13	8.1592	GVVPLAGTNGETTTQGLDGLSER		P05064	ALDOA_MOUSE Fructose-bisphosphate aldolase A OS=Mus musculus OX=10090 GN=Aldoa PE=1 SV=2
46.59_2591.4088n	1	#59936	5	46.5888	2591.41	6.1568	CVLKIGEHTPSALAIMENANVLAR	[N-term] Acetyl N-TERM	P05064	ALDOA_MOUSE Fructose-bisphosphate aldolase A OS=Mus musculus OX=10090 GN=Aldoa PE=1 SV=2
60.98_2613.3248n	1	#1046	3	60.9845	2613.32	8.2889	VDKGVVPLAGTNGETTTQGLDGLSER		P05064	ALDOA_MOUSE Fructose-bisphosphate aldolase A OS=Mus musculus OX=10090 GN=Aldoa PE=1 SV=2
70.56_3098.5960n	1	#21796	4	70.5577	3098.6	6.4638	QLLLTADDRVNPCIGGVILFHETLYQK	[N-term] Acetyl N-TERM|[1] Deamidation Q	P05064	ALDOA_MOUSE Fructose-bisphosphate aldolase A OS=Mus musculus OX=10090 GN=Aldoa PE=1 SV=2
76.98_3118.5616n	1	#62707	3	76.9822	3118.56	7.2994	YASICQQNGIVPIVEPEILPDGDHDLKR		P05064	ALDOA_MOUSE Fructose-bisphosphate aldolase A OS=Mus musculus OX=10090 GN=Aldoa PE=1 SV=2
59.71_3903.9878n	1	#110608	5	59.7116	3903.99	6.4035	VLAAVYKALSDHHVYLEGTLLKPNMVTPGHACTQK	[N-term] Acetyl N-TERM|[32] Carboxymethyl C	P05064	ALDOA_MOUSE Fructose-bisphosphate aldolase A OS=Mus musculus OX=10090 GN=Aldoa PE=1 SV=2
53.20_358.2331n	1	#6963	1	53.2	358.233	0	ALR		P05063	ALDOC_MOUSE Fructose-bisphosphate aldolase C OS=Mus musculus OX=10090 GN=Aldoc PE=1 SV=4
53.20_426.1754n	1	#42776	1	53.2	426.175	0	ELSD		P05063	ALDOC_MOUSE Fructose-bisphosphate aldolase C OS=Mus musculus OX=10090 GN=Aldoc PE=1 SV=4
53.20_610.2970n	1	#94385	1	53.2	610.297	0	ELSDIA		P05063	ALDOC_MOUSE Fructose-bisphosphate aldolase C OS=Mus musculus OX=10090 GN=Aldoc PE=1 SV=4
53.18_915.4998n	1	#15261	1	53.1769	915.5	7.9508	ELSDIALR		P05063	ALDOC_MOUSE Fructose-bisphosphate aldolase C OS=Mus musculus OX=10090 GN=Aldoc PE=1 SV=4
53.20_915.5025n	1	#7999	2	53.2	915.502	7.9508	ELSDIALR		P05063	ALDOC_MOUSE Fructose-bisphosphate aldolase C OS=Mus musculus OX=10090 GN=Aldoc PE=1 SV=4
52.76_1017.4824n	1	#6213	1	52.7582	1017.48	6.0649	DDNGVPFVR		P05063	ALDOC_MOUSE Fructose-bisphosphate aldolase C OS=Mus musculus OX=10090 GN=Aldoc PE=1 SV=4
52.94_1017.4913n	1	#121633	2	52.9447	1017.49	6.0649	DDNGVPFVR		P05063	ALDOC_MOUSE Fructose-bisphosphate aldolase C OS=Mus musculus OX=10090 GN=Aldoc PE=1 SV=4
52.73_1017.5230n	1	#6535	2	52.7347	1017.52	6.0649	DDNGVPFVR		P05063	ALDOC_MOUSE Fructose-bisphosphate aldolase C OS=Mus musculus OX=10090 GN=Aldoc PE=1 SV=4
49.51_1064.5149n	1	#8829	2	49.5122	1064.51	7.9784	DGADFAKWR		P05063	ALDOC_MOUSE Fructose-bisphosphate aldolase C OS=Mus musculus OX=10090 GN=Aldoc PE=1 SV=4
49.13_1064.5178n	1	#4372	2	49.1335	1064.52	7.7374	DGADFAKWR		P05063	ALDOC_MOUSE Fructose-bisphosphate aldolase C OS=Mus musculus OX=10090 GN=Aldoc PE=1 SV=4
52.35_1264.6021n	1	#8719	2	52.3494	1264.6	7.3248	DNAGAATEEFIK		P05063	ALDOC_MOUSE Fructose-bisphosphate aldolase C OS=Mus musculus OX=10090 GN=Aldoc PE=1 SV=4
56.18_1347.6704n	1	#7501	2	56.1752	1347.67	7.6096	GILAADESVGSMAK		P05063	ALDOC_MOUSE Fructose-bisphosphate aldolase C OS=Mus musculus OX=10090 GN=Aldoc PE=1 SV=4
46.67_1420.6935n	1	#24655	2	46.6746	1420.69	7.5137	DNAGAATEEFIKR		P05063	ALDOC_MOUSE Fructose-bisphosphate aldolase C OS=Mus musculus OX=10090 GN=Aldoc PE=1 SV=4
47.08_1420.6968n	2	#4757,#21830	2,3	47.0807	1420.7	8.3002	DNAGAATEEFIKR		P05063	ALDOC_MOUSE Fructose-bisphosphate aldolase C OS=Mus musculus OX=10090 GN=Aldoc PE=1 SV=4
53.68_1540.8148n	2	#11781,#10047	2,3	53.6832	1540.81	7.3108	ALQASALNAWRGQR		P05063	ALDOC_MOUSE Fructose-bisphosphate aldolase C OS=Mus musculus OX=10090 GN=Aldoc PE=1 SV=4
53.99_1540.8181n	1	#54476	3	53.9896	1540.82	7.3001	ALQASALNAWRGQR		P05063	ALDOC_MOUSE Fructose-bisphosphate aldolase C OS=Mus musculus OX=10090 GN=Aldoc PE=1 SV=4
43.79_1603.7753n	1	#9589	3	43.7913	1603.78	6.5346	DDNGVPFVRTIQDK	[3] Deamidation N	P05063	ALDOC_MOUSE Fructose-bisphosphate aldolase C OS=Mus musculus OX=10090 GN=Aldoc PE=1 SV=4
44.44_1605.7454n	1	#16506	3	44.4376	1605.75	6.451	GQRDNAGAATEEFIK		P05063	ALDOC_MOUSE Fructose-bisphosphate aldolase C OS=Mus musculus OX=10090 GN=Aldoc PE=1 SV=4
44.40_1605.7564n	1	#15189	3	44.4033	1605.76	6.451	GQRDNAGAATEEFIK		P05063	ALDOC_MOUSE Fructose-bisphosphate aldolase C OS=Mus musculus OX=10090 GN=Aldoc PE=1 SV=4
44.63_1605.7585n	1	#13390	3	44.6263	1605.76	6.451	GQRDNAGAATEEFIK		P05063	ALDOC_MOUSE Fructose-bisphosphate aldolase C OS=Mus musculus OX=10090 GN=Aldoc PE=1 SV=4
39.04_1643.8176n	1	#86556	2	39.0438	1643.82	7.1919	LSQIGVENTEENRR		P05063	ALDOC_MOUSE Fructose-bisphosphate aldolase C OS=Mus musculus OX=10090 GN=Aldoc PE=1 SV=4
39.08_1643.8242n	1	#26185	3	39.0781	1643.82	7.1919	LSQIGVENTEENRR		P05063	ALDOC_MOUSE Fructose-bisphosphate aldolase C OS=Mus musculus OX=10090 GN=Aldoc PE=1 SV=4
60.63_1943.0380n	2	#9913,#1485	2,3	60.6299	1943.04	8.1913	IVTPGKGILAADESVGSMAK		P05063	ALDOC_MOUSE Fructose-bisphosphate aldolase C OS=Mus musculus OX=10090 GN=Aldoc PE=1 SV=4
61.19_2113.9338n	1	#23780	2	61.1866	2113.93	7.7981	YEGSGDGGAAAQSLYIANHAY		P05063	ALDOC_MOUSE Fructose-bisphosphate aldolase C OS=Mus musculus OX=10090 GN=Aldoc PE=1 SV=4
73.36_3040.5527n	1	#47488	3	73.3563	3040.55	6.3105	ALSDHHVYLEGTLLKPNMVTPGHACPIK		P05063	ALDOC_MOUSE Fructose-bisphosphate aldolase C OS=Mus musculus OX=10090 GN=Aldoc PE=1 SV=4
76.98_3118.5616n	1	#62707	3	76.9822	3118.56	7.2994	YASICQQNGIVPIVEPEILPDGDHDLKR		P05063	ALDOC_MOUSE Fructose-bisphosphate aldolase C OS=Mus musculus OX=10090 GN=Aldoc PE=1 SV=4
63.45_1466.8272n	1	#75562	3	63.4465	1466.83	5.4108	LREMLNISGPPLK		Q9CPY7	AMPL_MOUSE Cytosol aminopeptidase OS=Mus musculus OX=10090 GN=Lap3 PE=1 SV=3
60.73_1628.7895n	1	#9896	3	60.7329	1628.79	5.5541	QVIDCQLADVNNLGK		Q9CPY7	AMPL_MOUSE Cytosol aminopeptidase OS=Mus musculus OX=10090 GN=Lap3 PE=1 SV=3
82.52_1839.8832n	1	#44249	2	82.5203	1839.88	5.4381	SWIEEQEMGSFLSVAK		Q9CPY7	AMPL_MOUSE Cytosol aminopeptidase OS=Mus musculus OX=10090 GN=Lap3 PE=1 SV=3
38.65_2082.9362n	1	#22614	4	38.6549	2082.94	7.3798	SAGVDDQENWHEGKENIR		Q9CPY7	AMPL_MOUSE Cytosol aminopeptidase OS=Mus musculus OX=10090 GN=Lap3 PE=1 SV=3
39.01_2082.9369n	1	#57844	3	39.0095	2082.94	6.9827	SAGVDDQENWHEGKENIR		Q9CPY7	AMPL_MOUSE Cytosol aminopeptidase OS=Mus musculus OX=10090 GN=Lap3 PE=1 SV=3
55.00_707.4681n	1	#154942	2	55.0044	707.468	5.2512	IIIPPR		Q8C8R3	ANK2_MOUSE Ankyrin-2 OS=Mus musculus OX=10090 GN=Ank2 PE=1 SV=2
61.99_795.3941n	1	#26462	1	61.9924	795.394	5.5411	LFEMTR		Q8C8R3	ANK2_MOUSE Ankyrin-2 OS=Mus musculus OX=10090 GN=Ank2 PE=1 SV=2
62.08_795.3959n	1	#150950	1	62.0821	795.396	5.5411	LFEMTR		Q8C8R3	ANK2_MOUSE Ankyrin-2 OS=Mus musculus OX=10090 GN=Ank2 PE=1 SV=2
75.73_836.3697n	1	#44721	1	75.7262	836.37	5.9069	FNGSSQR	[N-term] Acetyl N-TERM	Q8C8R3	ANK2_MOUSE Ankyrin-2 OS=Mus musculus OX=10090 GN=Ank2 PE=1 SV=2
55.90_863.4845n	1	#45048	1	55.9039	863.485	5.3374	MVNFLLK		Q8C8R3	ANK2_MOUSE Ankyrin-2 OS=Mus musculus OX=10090 GN=Ank2 PE=1 SV=2
97.90_872.4434n	1	#117029	1	97.9023	872.443	5.1493	TGLFEHK	[N-term] Acetyl N-TERM	Q8C8R3	ANK2_MOUSE Ankyrin-2 OS=Mus musculus OX=10090 GN=Ank2 PE=1 SV=2
53.75_963.4630n	1	#21170	1	53.7541	963.463	6.2889	LDGDAAFQK		Q8C8R3	ANK2_MOUSE Ankyrin-2 OS=Mus musculus OX=10090 GN=Ank2 PE=1 SV=2
50.70_1029.6205n	1	#56851	2	50.7018	1029.62	6.2518	LFASRLPVK		Q8C8R3	ANK2_MOUSE Ankyrin-2 OS=Mus musculus OX=10090 GN=Ank2 PE=1 SV=2
40.75_1108.4862n	1	#4572	1	40.754	1108.49	5.2766	SESDASSLDAK		Q8C8R3	ANK2_MOUSE Ankyrin-2 OS=Mus musculus OX=10090 GN=Ank2 PE=1 SV=2
57.50_1156.5237n	1	#17925	2	57.4959	1156.52	6.1169	FTPEEEMFK		Q8C8R3	ANK2_MOUSE Ankyrin-2 OS=Mus musculus OX=10090 GN=Ank2 PE=1 SV=2
46.28_1183.6611n	1	#18997	2	46.2799	1183.66	5.7959	NGYTPLHIAAK		Q8C8R3	ANK2_MOUSE Ankyrin-2 OS=Mus musculus OX=10090 GN=Ank2 PE=1 SV=2
54.62_1215.7500n	1	#178479	3	54.6222	1215.75	5.4013	VRLPALHIAAR		Q8C8R3	ANK2_MOUSE Ankyrin-2 OS=Mus musculus OX=10090 GN=Ank2 PE=1 SV=2
54.27_1215.7513n	1	#40045	3	54.272	1215.75	5.9316	VRLPALHIAAR		Q8C8R3	ANK2_MOUSE Ankyrin-2 OS=Mus musculus OX=10090 GN=Ank2 PE=1 SV=2
38.72_1285.6563n	1	#94885	2	38.7235	1285.66	6.4305	TAVPQGQETLSR		Q8C8R3	ANK2_MOUSE Ankyrin-2 OS=Mus musculus OX=10090 GN=Ank2 PE=1 SV=2
66.47_1329.7279n	1	#15221	2	66.4719	1329.73	5.9017	ATFSPIVTLEPR		Q8C8R3	ANK2_MOUSE Ankyrin-2 OS=Mus musculus OX=10090 GN=Ank2 PE=1 SV=2
54.65_1468.6988n	1	#48364	2	54.6462	1468.7	4.8717	SGLTSLHLAAQEDK		Q8C8R3	ANK2_MOUSE Ankyrin-2 OS=Mus musculus OX=10090 GN=Ank2 PE=1 SV=2
54.55_1468.7566n	1	#121184	2	54.5522	1468.76	4.8717	SGLTSLHLAAQEDK		Q8C8R3	ANK2_MOUSE Ankyrin-2 OS=Mus musculus OX=10090 GN=Ank2 PE=1 SV=2
41.55_1489.6967n	1	#77138	2	41.5547	1489.7	6.3406	SSPEDVVVTNSSNR		Q8C8R3	ANK2_MOUSE Ankyrin-2 OS=Mus musculus OX=10090 GN=Ank2 PE=1 SV=2
42.10_1489.6997n	1	#16258	2	42.0981	1489.7	6.6938	SSPEDVVVTNSSNR		Q8C8R3	ANK2_MOUSE Ankyrin-2 OS=Mus musculus OX=10090 GN=Ank2 PE=1 SV=2
56.40_1559.7688n	1	#20532	2	56.4023	1559.77	5.9452	ELPITNDITDSSQK		Q8C8R3	ANK2_MOUSE Ankyrin-2 OS=Mus musculus OX=10090 GN=Ank2 PE=1 SV=2
49.56_1564.7611n	1	#87374	2	49.5644	1564.76	5.5731	ELMKAFQSGQDPSK		Q8C8R3	ANK2_MOUSE Ankyrin-2 OS=Mus musculus OX=10090 GN=Ank2 PE=1 SV=2
45.12_1595.7644n	1	#41677	2	45.1182	1595.76	6.4352	GSPIVQEPEEASEPK		Q8C8R3	ANK2_MOUSE Ankyrin-2 OS=Mus musculus OX=10090 GN=Ank2 PE=1 SV=2
76.63_1601.9203n	1	#47266	2	76.6345	1601.92	6.3331	AGILPSHFPLPAAIAK		Q8C8R3	ANK2_MOUSE Ankyrin-2 OS=Mus musculus OX=10090 GN=Ank2 PE=1 SV=2
76.63_1601.9298n	1	#51294	3	76.6345	1601.93	6.3331	AGILPSHFPLPAAIAK		Q8C8R3	ANK2_MOUSE Ankyrin-2 OS=Mus musculus OX=10090 GN=Ank2 PE=1 SV=2
60.87_1614.8359n	1	#37637	3	60.8706	1614.84	6.1389	FVVFAKSHDPIEAR		Q8C8R3	ANK2_MOUSE Ankyrin-2 OS=Mus musculus OX=10090 GN=Ank2 PE=1 SV=2
63.26_1638.8245n	1	#5195	2	63.2636	1638.82	6.7683	TEWQPSPTDIPLQK		Q8C8R3	ANK2_MOUSE Ankyrin-2 OS=Mus musculus OX=10090 GN=Ank2 PE=1 SV=2
65.64_1657.8201n	1	#14867	2	65.6396	1657.82	6.8654	LATMPPMVEGEGLASR		Q8C8R3	ANK2_MOUSE Ankyrin-2 OS=Mus musculus OX=10090 GN=Ank2 PE=1 SV=2
63.35_1686.7773n	1	#13022	2	63.355	1686.78	6.3652	AGEEEPGEPFEIVER		Q8C8R3	ANK2_MOUSE Ankyrin-2 OS=Mus musculus OX=10090 GN=Ank2 PE=1 SV=2
42.00_1748.7374n	1	#120042	2	41.9952	1748.74	5.0021	MNEEIQEEPATSEDK		Q8C8R3	ANK2_MOUSE Ankyrin-2 OS=Mus musculus OX=10090 GN=Ank2 PE=1 SV=2
49.89_1793.8806n	1	#93963	2	49.8943	1793.88	6.2441	VSSSSSESEPELTQLSK		Q8C8R3	ANK2_MOUSE Ankyrin-2 OS=Mus musculus OX=10090 GN=Ank2 PE=1 SV=2
60.90_1797.9438n	2	#184,#2506	3,4	60.9047	1797.94	6.6487	ATSPLIEETPIGSIKDK		Q8C8R3	ANK2_MOUSE Ankyrin-2 OS=Mus musculus OX=10090 GN=Ank2 PE=1 SV=2
57.47_1823.9080n	2	#2448,#1190	2,3	57.4728	1823.91	5.4815	TAVPQGQETLSRAPDGR	[N-term] Acetyl N-TERM	Q8C8R3	ANK2_MOUSE Ankyrin-2 OS=Mus musculus OX=10090 GN=Ank2 PE=1 SV=2
67.82_1839.9776n	1	#2153	3	67.821	1839.98	5.8399	HATDTILIECLTKINR		Q8C8R3	ANK2_MOUSE Ankyrin-2 OS=Mus musculus OX=10090 GN=Ank2 PE=1 SV=2
67.80_1839.9829n	1	#113	2	67.7982	1839.98	5.8399	HATDTILIECLTKINR		Q8C8R3	ANK2_MOUSE Ankyrin-2 OS=Mus musculus OX=10090 GN=Ank2 PE=1 SV=2
71.20_1861.0418n	1	#40796	3	71.2042	1861.04	5.9536	MKAGILPSHFPLPAAIAK		Q8C8R3	ANK2_MOUSE Ankyrin-2 OS=Mus musculus OX=10090 GN=Ank2 PE=1 SV=2
57.05_1906.0217n	1	#61610	3	57.0482	1906.02	5.6131	KGNTALHIASLAGQAEVVK		Q8C8R3	ANK2_MOUSE Ankyrin-2 OS=Mus musculus OX=10090 GN=Ank2 PE=1 SV=2
46.02_1949.9288n	1	#72919	2	46.0226	1949.93	5.5387	SFSSDRSHTLSHASYLR		Q8C8R3	ANK2_MOUSE Ankyrin-2 OS=Mus musculus OX=10090 GN=Ank2 PE=1 SV=2
40.36_1949.9414n	1	#49609	4	40.3593	1949.94	5.9241	SFSSDRSHTLSHASYLR		Q8C8R3	ANK2_MOUSE Ankyrin-2 OS=Mus musculus OX=10090 GN=Ank2 PE=1 SV=2
55.14_2004.9730n	1	#17172	3	55.1436	2004.97	6.2443	NGLSPLHMAAQGDHVECVK		Q8C8R3	ANK2_MOUSE Ankyrin-2 OS=Mus musculus OX=10090 GN=Ank2 PE=1 SV=2
38.50_2094.8732n	1	#130968	3	38.5005	2094.87	6.0797	MNEEIQEEPATSEDKDCK		Q8C8R3	ANK2_MOUSE Ankyrin-2 OS=Mus musculus OX=10090 GN=Ank2 PE=1 SV=2
35.86_2096.8715n	1	#218705	3	35.8581	2096.87	4.6733	SVYSGQDDESPESSPEEQK		Q8C8R3	ANK2_MOUSE Ankyrin-2 OS=Mus musculus OX=10090 GN=Ank2 PE=1 SV=2
54.80_2192.1209n	1	#110204	2	54.7953	2192.12	5.8934	APTQRTEWQPSPTDIPLQK		Q8C8R3	ANK2_MOUSE Ankyrin-2 OS=Mus musculus OX=10090 GN=Ank2 PE=1 SV=2
69.12_2196.1053n	1	#41967	2	69.1217	2196.11	6.9125	DSAMIDDTVVIPSHQVSALAK		Q8C8R3	ANK2_MOUSE Ankyrin-2 OS=Mus musculus OX=10090 GN=Ank2 PE=1 SV=2
70.13_2206.1026n	1	#19799	4	70.1256	2206.1	5.5815	DEFLPALSLQSGALGGSSESLK	[10] Deamidation Q	Q8C8R3	ANK2_MOUSE Ankyrin-2 OS=Mus musculus OX=10090 GN=Ank2 PE=1 SV=2
69.07_2218.1783n	2	#49263,#3363	2,3	69.0743	2218.18	6.9879	QTPRPAVPGPVGQLDFSPVTR		Q8C8R3	ANK2_MOUSE Ankyrin-2 OS=Mus musculus OX=10090 GN=Ank2 PE=1 SV=2
54.32_2229.1183n	1	#31629	3	54.3194	2229.12	6.2645	ELPITNDITDSSQKQGAGVTR		Q8C8R3	ANK2_MOUSE Ankyrin-2 OS=Mus musculus OX=10090 GN=Ank2 PE=1 SV=2
43.57_2281.0763n	1	#19438	3	43.5682	2281.08	6.8069	GSPIVQEPEEASEPKEESSPR		Q8C8R3	ANK2_MOUSE Ankyrin-2 OS=Mus musculus OX=10090 GN=Ank2 PE=1 SV=2
43.04_2281.0791n	1	#106461	3	43.0361	2281.08	6.2926	GSPIVQEPEEASEPKEESSPR		Q8C8R3	ANK2_MOUSE Ankyrin-2 OS=Mus musculus OX=10090 GN=Ank2 PE=1 SV=2
71.93_2422.2967n	1	#20381	4	71.9262	2422.3	5.9592	SGLTSLHLAAQEDKVNVADILTK		Q8C8R3	ANK2_MOUSE Ankyrin-2 OS=Mus musculus OX=10090 GN=Ank2 PE=1 SV=2
82.31_2424.3493n	2	#1070,#722	3,4	82.3088	2424.35	5.8384	STRGLVHQAICNLNITLPIYAK		Q8C8R3	ANK2_MOUSE Ankyrin-2 OS=Mus musculus OX=10090 GN=Ank2 PE=1 SV=2
52.85_2431.2291n	1	#33403	4	52.8516	2431.23	5.3241	EAVSTAVEEPPTTQRSDSLSTVK		Q8C8R3	ANK2_MOUSE Ankyrin-2 OS=Mus musculus OX=10090 GN=Ank2 PE=1 SV=2
61.44_2455.2101n	1	#24837	3	61.4442	2455.21	5.6077	SAALLLQNDHNADVQSKMMVNR	[7] Deamidation Q	Q8C8R3	ANK2_MOUSE Ankyrin-2 OS=Mus musculus OX=10090 GN=Ank2 PE=1 SV=2
86.54_2669.1715n	1	#189727	3	86.5384	2669.17	4.7407	EPRQDGSSSASDPDADYSAEVNDEK	[4] Deamidation Q	Q8C8R3	ANK2_MOUSE Ankyrin-2 OS=Mus musculus OX=10090 GN=Ank2 PE=1 SV=2
51.20_2699.4051n	1	#27722	5	51.1966	2699.41	5.1996	GLVPEPLPTAKATSPLIEETPIGSIK	[N-term] Acetyl N-TERM	Q8C8R3	ANK2_MOUSE Ankyrin-2 OS=Mus musculus OX=10090 GN=Ank2 PE=1 SV=2
57.19_2754.2445n	1	#14898	3	57.1872	2754.24	6.1909	TEGDSPAAALSPQMHQEPVQQDFSGK		Q8C8R3	ANK2_MOUSE Ankyrin-2 OS=Mus musculus OX=10090 GN=Ank2 PE=1 SV=2
56.77_2754.2461n	1	#77241	3	56.7731	2754.25	6.358	TEGDSPAAALSPQMHQEPVQQDFSGK		Q8C8R3	ANK2_MOUSE Ankyrin-2 OS=Mus musculus OX=10090 GN=Ank2 PE=1 SV=2
74.57_2867.4687n	1	#194681	3	74.5747	2867.47	5.8957	VVEYLKGGIDINTCNQNGLNALHLAAK		Q8C8R3	ANK2_MOUSE Ankyrin-2 OS=Mus musculus OX=10090 GN=Ank2 PE=1 SV=2
69.84_2906.4914n	1	#69626	3	69.8434	2906.49	5.9546	TEWQPSPTDIPLQKTAVPQGQETLSR		Q8C8R3	ANK2_MOUSE Ankyrin-2 OS=Mus musculus OX=10090 GN=Ank2 PE=1 SV=2
58.44_3005.4363n	1	#55847	3	58.4383	3005.44	6.1189	TQSESETQESLTPSEVTKPFPPSDASVK		Q8C8R3	ANK2_MOUSE Ankyrin-2 OS=Mus musculus OX=10090 GN=Ank2 PE=1 SV=2
62.42_3067.5140n	1	#69272	4	62.4228	3067.51	5.1548	SALWAAQSDAPPLAVAPTASDAASVTGEQASK		Q8C8R3	ANK2_MOUSE Ankyrin-2 OS=Mus musculus OX=10090 GN=Ank2 PE=1 SV=2
85.22_3382.7320n	1	#104735	5	85.2224	3382.73	6.0136	QDSNLIGPEGGVLSSTVVSQVQAVFPEGALTKR		Q8C8R3	ANK2_MOUSE Ankyrin-2 OS=Mus musculus OX=10090 GN=Ank2 PE=1 SV=2
65.83_3567.6954n	1	#13117	5	65.8252	3567.7	5.6545	ATAVPDSLCKTPEDISTPPEGTKPCLQTPVTSER		Q8C8R3	ANK2_MOUSE Ankyrin-2 OS=Mus musculus OX=10090 GN=Ank2 PE=1 SV=2
75.01_3584.8183n	1	#15773	5	75.0101	3584.82	5.5049	QGVTPLHLASQEGHTDMVTLLLDKGANIHMSTK	[N-term] Acetyl N-TERM|[1] Deamidation Q	Q8C8R3	ANK2_MOUSE Ankyrin-2 OS=Mus musculus OX=10090 GN=Ank2 PE=1 SV=2
76.11_3930.8436n	1	#9685	4	76.1131	3930.84	6.4768	TLPTLVPAPPSAEDESAFSDDFPSSLDEDSKEGGAKPK		Q8C8R3	ANK2_MOUSE Ankyrin-2 OS=Mus musculus OX=10090 GN=Ank2 PE=1 SV=2
65.89_4454.3920n	1	#3137	5	65.8948	4454.39	6.3386	NGYTPLHQAAQQGHTHIINVLLQHGAKPNATTANGNTALAIAK		Q8C8R3	ANK2_MOUSE Ankyrin-2 OS=Mus musculus OX=10090 GN=Ank2 PE=1 SV=2
97.38_5444.8583n	1	#30762	5	97.3772	5444.86	6.5587	TEIVQLLLQHMAHPDAATTNGYTPLHISAREGQVDVASVLLEAGAAHSLATK		Q8C8R3	ANK2_MOUSE Ankyrin-2 OS=Mus musculus OX=10090 GN=Ank2 PE=1 SV=2
60.96_1267.5816n	1	#8385	2	60.9617	1267.58	6.5713	GTVTDFPGFDGR		P48036	ANXA5_MOUSE Annexin A5 OS=Mus musculus OX=10090 GN=Anxa5 PE=1 SV=1
68.15_2096.9684n	1	#7851	3	68.1548	2096.97	5.4682	NFATSLYSMIKGDTSGDYK		P48036	ANXA5_MOUSE Annexin A5 OS=Mus musculus OX=10090 GN=Anxa5 PE=1 SV=1
68.13_2096.9711n	1	#8759	3	68.1311	2096.97	5.4682	NFATSLYSMIKGDTSGDYK		P48036	ANXA5_MOUSE Annexin A5 OS=Mus musculus OX=10090 GN=Anxa5 PE=1 SV=1
72.54_907.4405n	1	#45371	1	72.5362	907.44	6.4395	NRLGQYR	[1] Deamidation N|[5] Deamidation Q	P08226	APOE_MOUSE Apolipoprotein E OS=Mus musculus OX=10090 GN=Apoe PE=1 SV=2
72.67_907.4516n	1	#7149	2	72.6719	907.452	6.4395	NRLGQYR	[1] Deamidation N|[5] Deamidation Q	P08226	APOE_MOUSE Apolipoprotein E OS=Mus musculus OX=10090 GN=Apoe PE=1 SV=2
45.68_967.5193n	1	#61268	2	45.6848	967.519	6.8568	LGPLVEQGR		P08226	APOE_MOUSE Apolipoprotein E OS=Mus musculus OX=10090 GN=Apoe PE=1 SV=2
45.98_967.5436n	2	#133816,#3181	1,2	45.9797	967.544	6.998	LGPLVEQGR		P08226	APOE_MOUSE Apolipoprotein E OS=Mus musculus OX=10090 GN=Apoe PE=1 SV=2
50.48_1018.4761n	1	#66741	2	50.4808	1018.48	6.3847	LGADMEDLR		P08226	APOE_MOUSE Apolipoprotein E OS=Mus musculus OX=10090 GN=Apoe PE=1 SV=2
42.03_1509.7946n	1	#34262	2	42.0295	1509.79	6.6868	TANLGAGAAQPLRDR		P08226	APOE_MOUSE Apolipoprotein E OS=Mus musculus OX=10090 GN=Apoe PE=1 SV=2
41.57_1509.7948n	1	#116771	2	41.5719	1509.79	5.8442	TANLGAGAAQPLRDR		P08226	APOE_MOUSE Apolipoprotein E OS=Mus musculus OX=10090 GN=Apoe PE=1 SV=2
42.06_1509.8016n	1	#7870	3	42.0638	1509.8	6.6868	TANLGAGAAQPLRDR		P08226	APOE_MOUSE Apolipoprotein E OS=Mus musculus OX=10090 GN=Apoe PE=1 SV=2
85.66_3892.9986n	1	#21903	4	85.6641	3893	6.8528	EQTELDGTSGLAEIDSGPVLANPFQPIAAVIIENEKK		Q640N2	AR13B_MOUSE ADP-ribosylation factor-like protein 13B OS=Mus musculus OX=10090 GN=Arl13b PE=1 SV=2
85.63_3893.0050n	1	#5145	5	85.6312	3893	6.8528	EQTELDGTSGLAEIDSGPVLANPFQPIAAVIIENEKK		Q640N2	AR13B_MOUSE ADP-ribosylation factor-like protein 13B OS=Mus musculus OX=10090 GN=Arl13b PE=1 SV=2
40.65_1782.7740n	2	#110633,#39822	2,3	40.651	1782.77	5.3257	SPSSDSWTCADASTGRR		Q9EPJ9	ARFG1_MOUSE ADP-ribosylation factor GTPase-activating protein 1 OS=Mus musculus OX=10090 GN=Arfgap1 PE=1 SV=2
56.06_1788.7754n	1	#15728	2	56.0633	1788.78	5.862	KAAPSTADEGWDNQNW		Q9EPJ9	ARFG1_MOUSE ADP-ribosylation factor GTPase-activating protein 1 OS=Mus musculus OX=10090 GN=Arfgap1 PE=1 SV=2
68.45_2850.4452n	2	#25090,#109434	3,4	68.4518	2850.45	6.3289	VATLAEGKEWSLESSPAQNWTPPQPK		Q9EPJ9	ARFG1_MOUSE ADP-ribosylation factor GTPase-activating protein 1 OS=Mus musculus OX=10090 GN=Arfgap1 PE=1 SV=2
46.33_505.2520n	1	#13495	1	46.3314	505.252	0	EVCR		Q8K3A6	ARMX6_MOUSE Protein ARMCX6 OS=Mus musculus OX=10090 GN=Armcx6 PE=2 SV=1
46.40_951.4197n	2	#12401,#1120	1,2	46.4	951.42	7.2939	MSIDEVCR		Q8K3A6	ARMX6_MOUSE Protein ARMCX6 OS=Mus musculus OX=10090 GN=Armcx6 PE=2 SV=1
49.49_1309.5285n	1	#11386	2	49.495	1309.53	7.6831	YFDSGDYNMAK		P56212	ARP19_MOUSE cAMP-regulated phosphoprotein 19 OS=Mus musculus OX=10090 GN=Arpp19 PE=1 SV=2
38.21_1444.6732n	1	#44082	2	38.2088	1444.67	5.6396	SAEVPEAASAEEQK		P56212	ARP19_MOUSE cAMP-regulated phosphoprotein 19 OS=Mus musculus OX=10090 GN=Arpp19 PE=1 SV=2
46.30_1622.7046n	1	#115877	3	46.2971	1622.7	6.5112	GQKYFDSGDYNMAK		P56212	ARP19_MOUSE cAMP-regulated phosphoprotein 19 OS=Mus musculus OX=10090 GN=Arpp19 PE=1 SV=2
46.13_1622.7050n	1	#81911	2	46.1255	1622.71	7.1349	GQKYFDSGDYNMAK		P56212	ARP19_MOUSE cAMP-regulated phosphoprotein 19 OS=Mus musculus OX=10090 GN=Arpp19 PE=1 SV=2
50.82_1670.8487n	2	#52972,#11843	2,4	50.8247	1670.85	7.2815	YPHLGQKPGGSDFLR		P56212	ARP19_MOUSE cAMP-regulated phosphoprotein 19 OS=Mus musculus OX=10090 GN=Arpp19 PE=1 SV=2
45.87_1798.9424n	1	#106284	4	45.8737	1798.94	7.3579	YPHLGQKPGGSDFLRK		P56212	ARP19_MOUSE cAMP-regulated phosphoprotein 19 OS=Mus musculus OX=10090 GN=Arpp19 PE=1 SV=2
45.58_1798.9442n	2	#70137,#38609	3,4	45.5818	1798.94	7.6314	YPHLGQKPGGSDFLRK		P56212	ARP19_MOUSE cAMP-regulated phosphoprotein 19 OS=Mus musculus OX=10090 GN=Arpp19 PE=1 SV=2
47.05_1897.9807n	1	#180491	3	47.0464	1897.98	7.3512	ARYPHLGQKPGGSDFLR		P56212	ARP19_MOUSE cAMP-regulated phosphoprotein 19 OS=Mus musculus OX=10090 GN=Arpp19 PE=1 SV=2
46.83_1897.9827n	1	#32952	3	46.829	1897.98	7.7332	ARYPHLGQKPGGSDFLR		P56212	ARP19_MOUSE cAMP-regulated phosphoprotein 19 OS=Mus musculus OX=10090 GN=Arpp19 PE=1 SV=2
46.45_1897.9854n	1	#24855	4	46.4515	1897.99	6.9547	ARYPHLGQKPGGSDFLR		P56212	ARP19_MOUSE cAMP-regulated phosphoprotein 19 OS=Mus musculus OX=10090 GN=Arpp19 PE=1 SV=2
46.85_1897.9874n	1	#6608	4	46.8462	1897.99	7.8665	ARYPHLGQKPGGSDFLR		P56212	ARP19_MOUSE cAMP-regulated phosphoprotein 19 OS=Mus musculus OX=10090 GN=Arpp19 PE=1 SV=2
46.81_1897.9878n	1	#32077	3	46.8119	1897.99	7.8665	ARYPHLGQKPGGSDFLR		P56212	ARP19_MOUSE cAMP-regulated phosphoprotein 19 OS=Mus musculus OX=10090 GN=Arpp19 PE=1 SV=2
57.40_2794.4074n	1	#46203	3	57.4037	2794.41	6.8342	QLPAAAPDKTEVTGDHIPTPQDLPQR		P56212	ARP19_MOUSE cAMP-regulated phosphoprotein 19 OS=Mus musculus OX=10090 GN=Arpp19 PE=1 SV=2
59.78_947.5317n	1	#25990	2	59.7833	947.532	6.6108	IVAEEFLK		P59999	ARPC4_MOUSE Actin-related protein 2/3 complex subunit 4 OS=Mus musculus OX=10090 GN=Arpc4 PE=1 SV=3
54.15_1069.6191n	1	#82333	2	54.1534	1069.62	7.093	ALAAGGVGSIVR		Q9CPW4	ARPC5_MOUSE Actin-related protein 2/3 complex subunit 5 OS=Mus musculus OX=10090 GN=Arpc5 PE=1 SV=3
65.55_1352.6353n	1	#44323	2	65.5465	1352.64	5.454	ETNETSFEAGIR		Q7TNS7	ASIC4_MOUSE Acid-sensing ion channel 4 OS=Mus musculus OX=10090 GN=Asic4 PE=2 SV=1
59.00_3447.7640n	1	#70316	5	58.9982	3447.76	5.7625	GYLTRPHLVAMDPAAPAPVAGFPAVTLCNINR	[N-term] Acetyl N-TERM|[11] Oxidation M|[28] Carboxymethyl C	Q7TNS7	ASIC4_MOUSE Acid-sensing ion channel 4 OS=Mus musculus OX=10090 GN=Asic4 PE=2 SV=1
52.91_1030.5615n	2	#71150,#7120	1,2	52.9098	1030.56	7.7733	LIIVEGCQR		Q9Z1W8	AT12A_MOUSE Potassium-transporting ATPase alpha chain 2 OS=Mus musculus OX=10090 GN=Atp12a PE=1 SV=3
53.22_1030.5646n	1	#7650	2	53.2229	1030.56	7.6827	LIIVEGCQR		Q9Z1W8	AT12A_MOUSE Potassium-transporting ATPase alpha chain 2 OS=Mus musculus OX=10090 GN=Atp12a PE=1 SV=3
50.91_1218.6249n	1	#3710	2	50.9105	1218.62	8.0282	VAEIPFNSTNK		Q9Z1W8	AT12A_MOUSE Potassium-transporting ATPase alpha chain 2 OS=Mus musculus OX=10090 GN=Atp12a PE=1 SV=3
49.39_1671.7809n	1	#47066	2	49.3919	1671.78	5.5817	FQLSIHETEDPNDK		Q9Z1W8	AT12A_MOUSE Potassium-transporting ATPase alpha chain 2 OS=Mus musculus OX=10090 GN=Atp12a PE=1 SV=3
55.48_1837.0117n	3	#2833,#198,#6197	2,3,4	55.4835	1837.01	8.152	SAGIKVIMVTGDHPITAK		Q9Z1W8	AT12A_MOUSE Potassium-transporting ATPase alpha chain 2 OS=Mus musculus OX=10090 GN=Atp12a PE=1 SV=3
79.33_3042.5726n	1	#32685	4	79.3307	3042.57	5.6698	NIGFYSTTCLEGTATGIVINTGDRTIIGR		Q9Z1W8	AT12A_MOUSE Potassium-transporting ATPase alpha chain 2 OS=Mus musculus OX=10090 GN=Atp12a PE=1 SV=3
79.31_3042.6509n	1	#31553	4	79.3063	3042.65	5.6698	NIGFYSTTCLEGTATGIVINTGDRTIIGR		Q9Z1W8	AT12A_MOUSE Potassium-transporting ATPase alpha chain 2 OS=Mus musculus OX=10090 GN=Atp12a PE=1 SV=3
77.71_3890.1991n	1	#44547	4	77.7141	3890.2	5.069	YYVLDAIIFLISIIVANVPEGLLATVTVTLSLTAKR	[17] Deamidation N	Q9Z1W8	AT12A_MOUSE Potassium-transporting ATPase alpha chain 2 OS=Mus musculus OX=10090 GN=Atp12a PE=1 SV=3
49.84_981.5249n	1	#11738	2	49.8428	981.525	7.4181	LSLDELHR		Q8VDN2	AT1A1_MOUSE Sodium/potassium-transporting ATPase subunit alpha-1 OS=Mus musculus OX=10090 GN=Atp1a1 PE=1 SV=1
48.71_989.5940n	1	#83217	2	48.7081	989.594	6.0731	LIFDNLKK		Q8VDN2	AT1A1_MOUSE Sodium/potassium-transporting ATPase subunit alpha-1 OS=Mus musculus OX=10090 GN=Atp1a1 PE=1 SV=1
52.91_1030.5615n	2	#71150,#7120	1,2	52.9098	1030.56	7.8677	LIIVEGCQR		Q8VDN2	AT1A1_MOUSE Sodium/potassium-transporting ATPase subunit alpha-1 OS=Mus musculus OX=10090 GN=Atp1a1 PE=1 SV=1
53.22_1030.5646n	1	#7650	2	53.2229	1030.56	7.6827	LIIVEGCQR		Q8VDN2	AT1A1_MOUSE Sodium/potassium-transporting ATPase subunit alpha-1 OS=Mus musculus OX=10090 GN=Atp1a1 PE=1 SV=1
42.98_1109.6127n	1	#15389	2	42.9846	1109.61	7.764	LSLDELHRK		Q8VDN2	AT1A1_MOUSE Sodium/potassium-transporting ATPase subunit alpha-1 OS=Mus musculus OX=10090 GN=Atp1a1 PE=1 SV=1
42.41_1109.6166n	1	#39243	3	42.4069	1109.62	6.9541	LSLDELHRK		Q8VDN2	AT1A1_MOUSE Sodium/potassium-transporting ATPase subunit alpha-1 OS=Mus musculus OX=10090 GN=Atp1a1 PE=1 SV=1
42.98_1109.6188n	1	#14936	3	42.9846	1109.62	7.764	LSLDELHRK		Q8VDN2	AT1A1_MOUSE Sodium/potassium-transporting ATPase subunit alpha-1 OS=Mus musculus OX=10090 GN=Atp1a1 PE=1 SV=1
48.95_1230.6360n	1	#30515	2	48.9489	1230.64	7.6358	AVAGDASESALLK		Q8VDN2	AT1A1_MOUSE Sodium/potassium-transporting ATPase subunit alpha-1 OS=Mus musculus OX=10090 GN=Atp1a1 PE=1 SV=1
49.29_1230.6433n	1	#10319	2	49.2887	1230.64	7.5064	AVAGDASESALLK		Q8VDN2	AT1A1_MOUSE Sodium/potassium-transporting ATPase subunit alpha-1 OS=Mus musculus OX=10090 GN=Atp1a1 PE=1 SV=1
54.89_1262.7103n	1	#374	2	54.8884	1262.71	7.7243	LNIPVNQVNPR		Q8VDN2	AT1A1_MOUSE Sodium/potassium-transporting ATPase subunit alpha-1 OS=Mus musculus OX=10090 GN=Atp1a1 PE=1 SV=1
60.73_1267.7013n	1	#4563	2	60.7329	1267.7	7.5173	NMVPQQALVIR		Q8VDN2	AT1A1_MOUSE Sodium/potassium-transporting ATPase subunit alpha-1 OS=Mus musculus OX=10090 GN=Atp1a1 PE=1 SV=1
72.11_1441.6816n	1	#35428	2	72.1059	1441.68	6.6122	DAKACVVHGSDLK	[N-term] Acetyl N-TERM|[5] Carboxymethyl C	Q8VDN2	AT1A1_MOUSE Sodium/potassium-transporting ATPase subunit alpha-1 OS=Mus musculus OX=10090 GN=Atp1a1 PE=1 SV=1
69.44_1583.8627n	1	#2671	2	69.4411	1583.86	7.8169	AVFQANQENLPILK		Q8VDN2	AT1A1_MOUSE Sodium/potassium-transporting ATPase subunit alpha-1 OS=Mus musculus OX=10090 GN=Atp1a1 PE=1 SV=1
68.84_1583.8650n	1	#21027	2	68.8391	1583.86	7.7252	AVFQANQENLPILK		Q8VDN2	AT1A1_MOUSE Sodium/potassium-transporting ATPase subunit alpha-1 OS=Mus musculus OX=10090 GN=Atp1a1 PE=1 SV=1
71.23_1584.8388n	1	#23823	2	71.2278	1584.84	6.4712	AVFQANQENLPILK	[9] Deamidation N	Q8VDN2	AT1A1_MOUSE Sodium/potassium-transporting ATPase subunit alpha-1 OS=Mus musculus OX=10090 GN=Atp1a1 PE=1 SV=1
36.33_1618.7470n	1	#2140	2	36.3328	1618.75	8.2397	VDNSSLTGESEPQTR		Q8VDN2	AT1A1_MOUSE Sodium/potassium-transporting ATPase subunit alpha-1 OS=Mus musculus OX=10090 GN=Atp1a1 PE=1 SV=1
37.44_1618.7498n	2	#692,#139170	2,3	37.4424	1618.75	8.2069	VDNSSLTGESEPQTR		Q8VDN2	AT1A1_MOUSE Sodium/potassium-transporting ATPase subunit alpha-1 OS=Mus musculus OX=10090 GN=Atp1a1 PE=1 SV=1
62.84_1638.8412n	1	#13935	2	62.8353	1638.84	5.8168	YSKIVEIPFNSTNK		Q8VDN2	AT1A1_MOUSE Sodium/potassium-transporting ATPase subunit alpha-1 OS=Mus musculus OX=10090 GN=Atp1a1 PE=1 SV=1
61.35_1739.9632n	1	#32467	2	61.3546	1739.96	7.7771	AVFQANQENLPILKR		Q8VDN2	AT1A1_MOUSE Sodium/potassium-transporting ATPase subunit alpha-1 OS=Mus musculus OX=10090 GN=Atp1a1 PE=1 SV=1
61.42_1739.9674n	1	#9858	3	61.4219	1739.97	7.7771	AVFQANQENLPILKR		Q8VDN2	AT1A1_MOUSE Sodium/potassium-transporting ATPase subunit alpha-1 OS=Mus musculus OX=10090 GN=Atp1a1 PE=1 SV=1
63.29_1740.9493n	1	#18198	3	63.2864	1740.95	6.6615	AVFQANQENLPILKR	[9] Deamidation N	Q8VDN2	AT1A1_MOUSE Sodium/potassium-transporting ATPase subunit alpha-1 OS=Mus musculus OX=10090 GN=Atp1a1 PE=1 SV=1
59.02_1810.9431n	1	#922	2	59.0213	1810.94	8.5463	QGAIVAVTGDGVNDSPALK		Q8VDN2	AT1A1_MOUSE Sodium/potassium-transporting ATPase subunit alpha-1 OS=Mus musculus OX=10090 GN=Atp1a1 PE=1 SV=1
58.82_1810.9437n	1	#8489	2	58.8152	1810.94	8.2291	QGAIVAVTGDGVNDSPALK		Q8VDN2	AT1A1_MOUSE Sodium/potassium-transporting ATPase subunit alpha-1 OS=Mus musculus OX=10090 GN=Atp1a1 PE=1 SV=1
66.97_1828.9177n	2	#129,#9423	2,3	66.9708	1828.92	8.5921	GVGIISEGNETVEDIAAR		Q8VDN2	AT1A1_MOUSE Sodium/potassium-transporting ATPase subunit alpha-1 OS=Mus musculus OX=10090 GN=Atp1a1 PE=1 SV=1
65.94_1828.9193n	1	#1928	2	65.9412	1828.92	8.283	GVGIISEGNETVEDIAAR		Q8VDN2	AT1A1_MOUSE Sodium/potassium-transporting ATPase subunit alpha-1 OS=Mus musculus OX=10090 GN=Atp1a1 PE=1 SV=1
55.48_1837.0117n	3	#2833,#198,#6197	2,3,4	55.4835	1837.01	8.4071	SAGIKVIMVTGDHPITAK		Q8VDN2	AT1A1_MOUSE Sodium/potassium-transporting ATPase subunit alpha-1 OS=Mus musculus OX=10090 GN=Atp1a1 PE=1 SV=1
52.31_1922.9106n	1	#90762	2	52.3116	1922.91	7.3118	EVSMDDHKLSLDELHR		Q8VDN2	AT1A1_MOUSE Sodium/potassium-transporting ATPase subunit alpha-1 OS=Mus musculus OX=10090 GN=Atp1a1 PE=1 SV=1
52.03_1922.9125n	1	#137715	4	52.0254	1922.91	7.494	EVSMDDHKLSLDELHR		Q8VDN2	AT1A1_MOUSE Sodium/potassium-transporting ATPase subunit alpha-1 OS=Mus musculus OX=10090 GN=Atp1a1 PE=1 SV=1
52.87_1939.0358n	1	#1824	3	52.8748	1939.04	8.2494	QGAIVAVTGDGVNDSPALKK		Q8VDN2	AT1A1_MOUSE Sodium/potassium-transporting ATPase subunit alpha-1 OS=Mus musculus OX=10090 GN=Atp1a1 PE=1 SV=1
73.70_2003.0342n	1	#144518	2	73.6951	2003.03	7.7612	IMESFKNMVPQQALVIR		Q8VDN2	AT1A1_MOUSE Sodium/potassium-transporting ATPase subunit alpha-1 OS=Mus musculus OX=10090 GN=Atp1a1 PE=1 SV=1
64.64_2212.1537n	2	#60514,#9445	2,3	64.6412	2212.15	7.79	AIAKGVGIISEGNETVEDIAAR		Q8VDN2	AT1A1_MOUSE Sodium/potassium-transporting ATPase subunit alpha-1 OS=Mus musculus OX=10090 GN=Atp1a1 PE=1 SV=1
48.33_2405.1453n	1	#33754	3	48.328	2405.15	7.3338	IISANGCKVDNSSLTGESEPQTR		Q8VDN2	AT1A1_MOUSE Sodium/potassium-transporting ATPase subunit alpha-1 OS=Mus musculus OX=10090 GN=Atp1a1 PE=1 SV=1
49.12_2405.1476n	1	#16441	3	49.1161	2405.15	7.8305	IISANGCKVDNSSLTGESEPQTR		Q8VDN2	AT1A1_MOUSE Sodium/potassium-transporting ATPase subunit alpha-1 OS=Mus musculus OX=10090 GN=Atp1a1 PE=1 SV=1
48.79_2405.1507n	1	#24639	3	48.7941	2405.15	7.6594	IISANGCKVDNSSLTGESEPQTR		Q8VDN2	AT1A1_MOUSE Sodium/potassium-transporting ATPase subunit alpha-1 OS=Mus musculus OX=10090 GN=Atp1a1 PE=1 SV=1
64.08_2738.3376n	1	#8750	3	64.0777	2738.34	7.4454	NLEAVETLGSTSTICSDKTGTLTQNR		Q8VDN2	AT1A1_MOUSE Sodium/potassium-transporting ATPase subunit alpha-1 OS=Mus musculus OX=10090 GN=Atp1a1 PE=1 SV=1
89.75_3073.6173n	2	#1826,#16308	3,4	89.7544	3073.62	8.1532	GVGIISEGNETVEDIAARLNIPVNQVNPR		Q8VDN2	AT1A1_MOUSE Sodium/potassium-transporting ATPase subunit alpha-1 OS=Mus musculus OX=10090 GN=Atp1a1 PE=1 SV=1
41.09_851.4347n	1	#134225	2	41.0914	851.435	7.0104	YQVDLSK		Q6PIE5	AT1A2_MOUSE Sodium/potassium-transporting ATPase subunit alpha-2 OS=Mus musculus OX=10090 GN=Atp1a2 PE=1 SV=1
41.50_851.4365n	1	#59935	2	41.5033	851.436	6.398	YQVDLSK		Q6PIE5	AT1A2_MOUSE Sodium/potassium-transporting ATPase subunit alpha-2 OS=Mus musculus OX=10090 GN=Atp1a2 PE=1 SV=1
57.74_901.4866n	2	#54177,#6069	1,2	57.7414	901.487	7.3844	LSLDELGR		Q6PIE5	AT1A2_MOUSE Sodium/potassium-transporting ATPase subunit alpha-2 OS=Mus musculus OX=10090 GN=Atp1a2 PE=1 SV=1
48.71_989.5940n	1	#83217	2	48.7081	989.594	6.0731	LIFDNLKK		Q6PIE5	AT1A2_MOUSE Sodium/potassium-transporting ATPase subunit alpha-2 OS=Mus musculus OX=10090 GN=Atp1a2 PE=1 SV=1
52.73_1017.5230n	1	#6535	2	52.7347	1017.52	7.4037	SPTWTALSR		Q6PIE5	AT1A2_MOUSE Sodium/potassium-transporting ATPase subunit alpha-2 OS=Mus musculus OX=10090 GN=Atp1a2 PE=1 SV=1
52.33_1017.5264n	1	#4671	2	52.33	1017.53	7.3941	SPTWTALSR		Q6PIE5	AT1A2_MOUSE Sodium/potassium-transporting ATPase subunit alpha-2 OS=Mus musculus OX=10090 GN=Atp1a2 PE=1 SV=1
52.91_1030.5615n	2	#71150,#7120	1,2	52.9098	1030.56	7.8677	LIIVEGCQR		Q6PIE5	AT1A2_MOUSE Sodium/potassium-transporting ATPase subunit alpha-2 OS=Mus musculus OX=10090 GN=Atp1a2 PE=1 SV=1
53.22_1030.5646n	1	#7650	2	53.2229	1030.56	7.6827	LIIVEGCQR		Q6PIE5	AT1A2_MOUSE Sodium/potassium-transporting ATPase subunit alpha-2 OS=Mus musculus OX=10090 GN=Atp1a2 PE=1 SV=1
43.34_1054.5443n	1	#78396	2	43.3449	1054.54	7.1132	GGDRVPADLR		Q6PIE5	AT1A2_MOUSE Sodium/potassium-transporting ATPase subunit alpha-2 OS=Mus musculus OX=10090 GN=Atp1a2 PE=1 SV=1
40.96_1187.6002n	1	#134943	2	40.9599	1187.6	6.9047	AGQENISVSKR		Q6PIE5	AT1A2_MOUSE Sodium/potassium-transporting ATPase subunit alpha-2 OS=Mus musculus OX=10090 GN=Atp1a2 PE=1 SV=1
40.48_1187.6044n	1	#12869	2	40.4795	1187.6	7.5702	AGQENISVSKR		Q6PIE5	AT1A2_MOUSE Sodium/potassium-transporting ATPase subunit alpha-2 OS=Mus musculus OX=10090 GN=Atp1a2 PE=1 SV=1
41.07_1187.6257n	1	#218232	2	41.0743	1187.63	7.0594	AGQENISVSKR		Q6PIE5	AT1A2_MOUSE Sodium/potassium-transporting ATPase subunit alpha-2 OS=Mus musculus OX=10090 GN=Atp1a2 PE=1 SV=1
50.91_1218.6249n	1	#3710	2	50.9105	1218.62	8.0282	VAEIPFNSTNK		Q6PIE5	AT1A2_MOUSE Sodium/potassium-transporting ATPase subunit alpha-2 OS=Mus musculus OX=10090 GN=Atp1a2 PE=1 SV=1
60.73_1267.7013n	1	#4563	2	60.7329	1267.7	7.5173	NMVPQQALVIR		Q6PIE5	AT1A2_MOUSE Sodium/potassium-transporting ATPase subunit alpha-2 OS=Mus musculus OX=10090 GN=Atp1a2 PE=1 SV=1
48.64_1276.6184n	1	#7980	2	48.6371	1276.62	8.0607	DTAGDASESALLK		Q6PIE5	AT1A2_MOUSE Sodium/potassium-transporting ATPase subunit alpha-2 OS=Mus musculus OX=10090 GN=Atp1a2 PE=1 SV=1
44.64_1368.6749n	1	#26352	2	44.6435	1368.67	7.2407	EDSPQSHVLVMK		Q6PIE5	AT1A2_MOUSE Sodium/potassium-transporting ATPase subunit alpha-2 OS=Mus musculus OX=10090 GN=Atp1a2 PE=1 SV=1
45.06_1368.6809n	2	#45504,#39442	2,3	45.0581	1368.68	7.8077	EDSPQSHVLVMK		Q6PIE5	AT1A2_MOUSE Sodium/potassium-transporting ATPase subunit alpha-2 OS=Mus musculus OX=10090 GN=Atp1a2 PE=1 SV=1
45.02_1476.7695n	2	#22026,#8170	2,3	45.0238	1476.77	7.385	AVFKAGQENISVSK		Q6PIE5	AT1A2_MOUSE Sodium/potassium-transporting ATPase subunit alpha-2 OS=Mus musculus OX=10090 GN=Atp1a2 PE=1 SV=1
44.58_1476.7751n	2	#78646,#30487	2,3	44.5834	1476.78	7.0529	AVFKAGQENISVSK		Q6PIE5	AT1A2_MOUSE Sodium/potassium-transporting ATPase subunit alpha-2 OS=Mus musculus OX=10090 GN=Atp1a2 PE=1 SV=1
47.05_1563.8243n	1	#23519	3	47.0464	1563.82	6.3595	LNIPVSQVNPREAK		Q6PIE5	AT1A2_MOUSE Sodium/potassium-transporting ATPase subunit alpha-2 OS=Mus musculus OX=10090 GN=Atp1a2 PE=1 SV=1
47.08_1563.8609n	1	#171177	3	47.0807	1563.86	6.3595	LNIPVSQVNPREAK		Q6PIE5	AT1A2_MOUSE Sodium/potassium-transporting ATPase subunit alpha-2 OS=Mus musculus OX=10090 GN=Atp1a2 PE=1 SV=1
36.33_1618.7470n	1	#2140	2	36.3328	1618.75	8.2397	VDNSSLTGESEPQTR		Q6PIE5	AT1A2_MOUSE Sodium/potassium-transporting ATPase subunit alpha-2 OS=Mus musculus OX=10090 GN=Atp1a2 PE=1 SV=1
37.44_1618.7498n	2	#692,#139170	2,3	37.4424	1618.75	8.2069	VDNSSLTGESEPQTR		Q6PIE5	AT1A2_MOUSE Sodium/potassium-transporting ATPase subunit alpha-2 OS=Mus musculus OX=10090 GN=Atp1a2 PE=1 SV=1
54.34_1710.8961n	1	#25868	2	54.343	1710.9	6.773	NMVPQQALVIREGEK		Q6PIE5	AT1A2_MOUSE Sodium/potassium-transporting ATPase subunit alpha-2 OS=Mus musculus OX=10090 GN=Atp1a2 PE=1 SV=1
59.02_1810.9431n	1	#922	2	59.0213	1810.94	8.5463	QGAIVAVTGDGVNDSPALK		Q6PIE5	AT1A2_MOUSE Sodium/potassium-transporting ATPase subunit alpha-2 OS=Mus musculus OX=10090 GN=Atp1a2 PE=1 SV=1
58.82_1810.9437n	1	#8489	2	58.8152	1810.94	8.2291	QGAIVAVTGDGVNDSPALK		Q6PIE5	AT1A2_MOUSE Sodium/potassium-transporting ATPase subunit alpha-2 OS=Mus musculus OX=10090 GN=Atp1a2 PE=1 SV=1
57.09_1826.8856n	2	#18709,#7912	2,3	57.0943	1826.89	7.2816	EVAMDDHKLSLDELGR		Q6PIE5	AT1A2_MOUSE Sodium/potassium-transporting ATPase subunit alpha-2 OS=Mus musculus OX=10090 GN=Atp1a2 PE=1 SV=1
66.97_1828.9177n	2	#129,#9423	2,3	66.9708	1828.92	8.5921	GVGIISEGNETVEDIAAR		Q6PIE5	AT1A2_MOUSE Sodium/potassium-transporting ATPase subunit alpha-2 OS=Mus musculus OX=10090 GN=Atp1a2 PE=1 SV=1
65.94_1828.9193n	1	#1928	2	65.9412	1828.92	8.283	GVGIISEGNETVEDIAAR		Q6PIE5	AT1A2_MOUSE Sodium/potassium-transporting ATPase subunit alpha-2 OS=Mus musculus OX=10090 GN=Atp1a2 PE=1 SV=1
55.48_1837.0117n	3	#2833,#198,#6197	2,3,4	55.4835	1837.01	8.4071	SAGIKVIMVTGDHPITAK		Q6PIE5	AT1A2_MOUSE Sodium/potassium-transporting ATPase subunit alpha-2 OS=Mus musculus OX=10090 GN=Atp1a2 PE=1 SV=1
52.87_1939.0358n	1	#1824	3	52.8748	1939.04	8.2494	QGAIVAVTGDGVNDSPALKK		Q6PIE5	AT1A2_MOUSE Sodium/potassium-transporting ATPase subunit alpha-2 OS=Mus musculus OX=10090 GN=Atp1a2 PE=1 SV=1
64.64_2212.1537n	2	#60514,#9445	2,3	64.6412	2212.15	7.79	AIAKGVGIISEGNETVEDIAAR		Q6PIE5	AT1A2_MOUSE Sodium/potassium-transporting ATPase subunit alpha-2 OS=Mus musculus OX=10090 GN=Atp1a2 PE=1 SV=1
58.46_2245.1369n	1	#9795	3	58.4611	2245.14	7.9847	VAEIPFNSTNKYQLSIHER		Q6PIE5	AT1A2_MOUSE Sodium/potassium-transporting ATPase subunit alpha-2 OS=Mus musculus OX=10090 GN=Atp1a2 PE=1 SV=1
74.84_2586.3389n	1	#66565	4	74.844	2586.34	6.5958	AQDILARDGPNALTPPPTTPEWVK		Q6PIE5	AT1A2_MOUSE Sodium/potassium-transporting ATPase subunit alpha-2 OS=Mus musculus OX=10090 GN=Atp1a2 PE=1 SV=1
73.45_2586.3527n	1	#6141	4	73.4493	2586.35	6.67	AQDILARDGPNALTPPPTTPEWVK		Q6PIE5	AT1A2_MOUSE Sodium/potassium-transporting ATPase subunit alpha-2 OS=Mus musculus OX=10090 GN=Atp1a2 PE=1 SV=1
64.08_2738.3376n	1	#8750	3	64.0777	2738.34	7.4454	NLEAVETLGSTSTICSDKTGTLTQNR		Q6PIE5	AT1A2_MOUSE Sodium/potassium-transporting ATPase subunit alpha-2 OS=Mus musculus OX=10090 GN=Atp1a2 PE=1 SV=1
90.28_3046.6029n	2	#154,#3219	3,4	90.28	3046.6	8.4958	GVGIISEGNETVEDIAARLNIPVSQVNPR		Q6PIE5	AT1A2_MOUSE Sodium/potassium-transporting ATPase subunit alpha-2 OS=Mus musculus OX=10090 GN=Atp1a2 PE=1 SV=1
73.88_3380.4401n	1	#24623	5	73.8827	3380.44	5.9627	MTVAHMWFDNQIHEADTTEDQSGATFDKR		Q6PIE5	AT1A2_MOUSE Sodium/potassium-transporting ATPase subunit alpha-2 OS=Mus musculus OX=10090 GN=Atp1a2 PE=1 SV=1
62.44_3380.4484n	1	#10907	4	62.4449	3380.45	6.9924	MTVAHMWFDNQIHEADTTEDQSGATFDKR		Q6PIE5	AT1A2_MOUSE Sodium/potassium-transporting ATPase subunit alpha-2 OS=Mus musculus OX=10090 GN=Atp1a2 PE=1 SV=1
79.83_3526.7413n	1	#5458	5	79.8329	3526.74	6.9862	ACVVHGSDLKDMTSEQLDEILRDHTEIVFAR		Q6PIE5	AT1A2_MOUSE Sodium/potassium-transporting ATPase subunit alpha-2 OS=Mus musculus OX=10090 GN=Atp1a2 PE=1 SV=1
44.64_362.1738n	1	#105607	1	44.6435	362.174	0	MGR		Q6PIC6	AT1A3_MOUSE Sodium/potassium-transporting ATPase subunit alpha-3 OS=Mus musculus OX=10090 GN=Atp1a3 PE=1 SV=1
44.16_362.1745n	1	#189095	1	44.163	362.174	0	MGR		Q6PIC6	AT1A3_MOUSE Sodium/potassium-transporting ATPase subunit alpha-3 OS=Mus musculus OX=10090 GN=Atp1a3 PE=1 SV=1
50.74_455.3102n	1	#123552	1	50.7399	455.31	0	PVLK		Q6PIC6	AT1A3_MOUSE Sodium/potassium-transporting ATPase subunit alpha-3 OS=Mus musculus OX=10090 GN=Atp1a3 PE=1 SV=1
56.02_455.3109n	1	#8754	1	56.0196	455.311	0	PVLK		Q6PIC6	AT1A3_MOUSE Sodium/potassium-transporting ATPase subunit alpha-3 OS=Mus musculus OX=10090 GN=Atp1a3 PE=1 SV=1
44.37_500.2699n	2	#23128,#155460	1,2	44.3689	500.27	0	PQTR		Q6PIC6	AT1A3_MOUSE Sodium/potassium-transporting ATPase subunit alpha-3 OS=Mus musculus OX=10090 GN=Atp1a3 PE=1 SV=1
46.33_505.2520n	1	#13495	1	46.3314	505.252	0	EVCR		Q6PIC6	AT1A3_MOUSE Sodium/potassium-transporting ATPase subunit alpha-3 OS=Mus musculus OX=10090 GN=Atp1a3 PE=1 SV=1
46.43_634.2741n	1	#70664	1	46.4344	634.274	0	EEVCR		Q6PIC6	AT1A3_MOUSE Sodium/potassium-transporting ATPase subunit alpha-3 OS=Mus musculus OX=10090 GN=Atp1a3 PE=1 SV=1
46.43_634.2776n	1	#58822	1	46.4344	634.278	0	EEVCR		Q6PIC6	AT1A3_MOUSE Sodium/potassium-transporting ATPase subunit alpha-3 OS=Mus musculus OX=10090 GN=Atp1a3 PE=1 SV=1
66.97_673.3394n	1	#15674	1	66.9708	673.339	0	EDIAAR		Q6PIC6	AT1A3_MOUSE Sodium/potassium-transporting ATPase subunit alpha-3 OS=Mus musculus OX=10090 GN=Atp1a3 PE=1 SV=1
46.00_951.4174n	2	#62215,#4705	1,2	45.9968	951.417	8.0921	MSVEEVCR		Q6PIC6	AT1A3_MOUSE Sodium/potassium-transporting ATPase subunit alpha-3 OS=Mus musculus OX=10090 GN=Atp1a3 PE=1 SV=1
46.40_951.4197n	2	#12401,#1120	1,2	46.4	951.42	8.0482	MSVEEVCR		Q6PIC6	AT1A3_MOUSE Sodium/potassium-transporting ATPase subunit alpha-3 OS=Mus musculus OX=10090 GN=Atp1a3 PE=1 SV=1
48.71_989.5940n	1	#83217	2	48.7081	989.594	6.0731	LIFDNLKK		Q6PIC6	AT1A3_MOUSE Sodium/potassium-transporting ATPase subunit alpha-3 OS=Mus musculus OX=10090 GN=Atp1a3 PE=1 SV=1
52.91_1030.5615n	2	#71150,#7120	1,2	52.9098	1030.56	7.8677	LIIVEGCQR		Q6PIC6	AT1A3_MOUSE Sodium/potassium-transporting ATPase subunit alpha-3 OS=Mus musculus OX=10090 GN=Atp1a3 PE=1 SV=1
53.22_1030.5646n	1	#7650	2	53.2229	1030.56	7.6827	LIIVEGCQR		Q6PIC6	AT1A3_MOUSE Sodium/potassium-transporting ATPase subunit alpha-3 OS=Mus musculus OX=10090 GN=Atp1a3 PE=1 SV=1
51.06_1039.5557n	1	#7103	2	51.0603	1039.56	7.8103	GGQDNIPVLK		Q6PIC6	AT1A3_MOUSE Sodium/potassium-transporting ATPase subunit alpha-3 OS=Mus musculus OX=10090 GN=Atp1a3 PE=1 SV=1
50.75_1039.5636n	2	#39312,#3461	1,2	50.7491	1039.56	7.9691	GGQDNIPVLK		Q6PIC6	AT1A3_MOUSE Sodium/potassium-transporting ATPase subunit alpha-3 OS=Mus musculus OX=10090 GN=Atp1a3 PE=1 SV=1
51.10_1039.5654n	1	#76529	1	51.0988	1039.57	7.8103	GGQDNIPVLK		Q6PIC6	AT1A3_MOUSE Sodium/potassium-transporting ATPase subunit alpha-3 OS=Mus musculus OX=10090 GN=Atp1a3 PE=1 SV=1
43.34_1054.5443n	1	#78396	2	43.3449	1054.54	7.1132	GGDRVPADLR		Q6PIC6	AT1A3_MOUSE Sodium/potassium-transporting ATPase subunit alpha-3 OS=Mus musculus OX=10090 GN=Atp1a3 PE=1 SV=1
44.03_1195.6597n	1	#165167	3	44.0258	1195.66	7.2816	GGQDNIPVLKR		Q6PIC6	AT1A3_MOUSE Sodium/potassium-transporting ATPase subunit alpha-3 OS=Mus musculus OX=10090 GN=Atp1a3 PE=1 SV=1
44.40_1195.6610n	1	#70170	3	44.4033	1195.66	7.5597	GGQDNIPVLKR		Q6PIC6	AT1A3_MOUSE Sodium/potassium-transporting ATPase subunit alpha-3 OS=Mus musculus OX=10090 GN=Atp1a3 PE=1 SV=1
50.91_1218.6249n	1	#3710	2	50.9105	1218.62	8.0282	VAEIPFNSTNK		Q6PIC6	AT1A3_MOUSE Sodium/potassium-transporting ATPase subunit alpha-3 OS=Mus musculus OX=10090 GN=Atp1a3 PE=1 SV=1
60.73_1267.7013n	1	#4563	2	60.7329	1267.7	7.5173	NMVPQQALVIR		Q6PIC6	AT1A3_MOUSE Sodium/potassium-transporting ATPase subunit alpha-3 OS=Mus musculus OX=10090 GN=Atp1a3 PE=1 SV=1
53.54_1274.6399n	1	#2043	2	53.5393	1274.64	7.7059	DVAGDASESALLK		Q6PIC6	AT1A3_MOUSE Sodium/potassium-transporting ATPase subunit alpha-3 OS=Mus musculus OX=10090 GN=Atp1a3 PE=1 SV=1
44.61_1416.7461n	1	#2126	2	44.6092	1416.75	7.1795	GVVVATGDRTVMGR		Q6PIC6	AT1A3_MOUSE Sodium/potassium-transporting ATPase subunit alpha-3 OS=Mus musculus OX=10090 GN=Atp1a3 PE=1 SV=1
44.16_1416.7479n	1	#9675	2	44.163	1416.75	7.2424	GVVVATGDRTVMGR		Q6PIC6	AT1A3_MOUSE Sodium/potassium-transporting ATPase subunit alpha-3 OS=Mus musculus OX=10090 GN=Atp1a3 PE=1 SV=1
45.03_1416.7484n	1	#51616	3	45.0324	1416.75	7.514	GVVVATGDRTVMGR		Q6PIC6	AT1A3_MOUSE Sodium/potassium-transporting ATPase subunit alpha-3 OS=Mus musculus OX=10090 GN=Atp1a3 PE=1 SV=1
45.41_1430.7335n	1	#7388	2	45.4102	1430.73	7.5915	RDVAGDASESALLK		Q6PIC6	AT1A3_MOUSE Sodium/potassium-transporting ATPase subunit alpha-3 OS=Mus musculus OX=10090 GN=Atp1a3 PE=1 SV=1
44.82_1464.6747n	1	#10572	2	44.8151	1464.67	8.1554	YNTDCVQGLTHSK		Q6PIC6	AT1A3_MOUSE Sodium/potassium-transporting ATPase subunit alpha-3 OS=Mus musculus OX=10090 GN=Atp1a3 PE=1 SV=1
45.15_1464.6796n	1	#21285	3	45.1525	1464.68	8.1554	YNTDCVQGLTHSK		Q6PIC6	AT1A3_MOUSE Sodium/potassium-transporting ATPase subunit alpha-3 OS=Mus musculus OX=10090 GN=Atp1a3 PE=1 SV=1
44.80_1464.6798n	1	#5494	3	44.7979	1464.68	7.8885	YNTDCVQGLTHSK		Q6PIC6	AT1A3_MOUSE Sodium/potassium-transporting ATPase subunit alpha-3 OS=Mus musculus OX=10090 GN=Atp1a3 PE=1 SV=1
44.30_1464.6811n	2	#32408,#23162	2,3	44.3003	1464.68	7.8548	YNTDCVQGLTHSK		Q6PIC6	AT1A3_MOUSE Sodium/potassium-transporting ATPase subunit alpha-3 OS=Mus musculus OX=10090 GN=Atp1a3 PE=1 SV=1
42.27_1483.6332n	1	#141602	3	42.2697	1483.63	6.9007	SPDCTHDNPLETR		Q6PIC6	AT1A3_MOUSE Sodium/potassium-transporting ATPase subunit alpha-3 OS=Mus musculus OX=10090 GN=Atp1a3 PE=1 SV=1
41.28_1483.6369n	1	#59211	3	41.2802	1483.64	7.6386	SPDCTHDNPLETR		Q6PIC6	AT1A3_MOUSE Sodium/potassium-transporting ATPase subunit alpha-3 OS=Mus musculus OX=10090 GN=Atp1a3 PE=1 SV=1
41.79_1483.6378n	2	#64751,#27926	2,3	41.7864	1483.64	6.8612	SPDCTHDNPLETR		Q6PIC6	AT1A3_MOUSE Sodium/potassium-transporting ATPase subunit alpha-3 OS=Mus musculus OX=10090 GN=Atp1a3 PE=1 SV=1
56.04_1484.8363n	2	#961,#2362	2,3	56.0414	1484.84	8.4793	AVFKGGQDNIPVLK		Q6PIC6	AT1A3_MOUSE Sodium/potassium-transporting ATPase subunit alpha-3 OS=Mus musculus OX=10090 GN=Atp1a3 PE=1 SV=1
40.32_1592.7603n	2	#22917,#5893	2,3	40.3165	1592.76	8.0254	KYNTDCVQGLTHSK		Q6PIC6	AT1A3_MOUSE Sodium/potassium-transporting ATPase subunit alpha-3 OS=Mus musculus OX=10090 GN=Atp1a3 PE=1 SV=1
40.02_1592.7646n	1	#13313	3	40.0162	1592.76	7.8388	KYNTDCVQGLTHSK		Q6PIC6	AT1A3_MOUSE Sodium/potassium-transporting ATPase subunit alpha-3 OS=Mus musculus OX=10090 GN=Atp1a3 PE=1 SV=1
36.33_1618.7470n	1	#2140	2	36.3328	1618.75	8.2397	VDNSSLTGESEPQTR		Q6PIC6	AT1A3_MOUSE Sodium/potassium-transporting ATPase subunit alpha-3 OS=Mus musculus OX=10090 GN=Atp1a3 PE=1 SV=1
37.44_1618.7498n	2	#692,#139170	2,3	37.4424	1618.75	8.2069	VDNSSLTGESEPQTR		Q6PIC6	AT1A3_MOUSE Sodium/potassium-transporting ATPase subunit alpha-3 OS=Mus musculus OX=10090 GN=Atp1a3 PE=1 SV=1
69.44_1658.7929n	1	#39156	2	69.4411	1658.79	6.492	NITFFSTNCVEGTAR		Q6PIC6	AT1A3_MOUSE Sodium/potassium-transporting ATPase subunit alpha-3 OS=Mus musculus OX=10090 GN=Atp1a3 PE=1 SV=1
54.34_1710.8961n	1	#25868	2	54.343	1710.9	6.773	NMVPQQALVIREGEK		Q6PIC6	AT1A3_MOUSE Sodium/potassium-transporting ATPase subunit alpha-3 OS=Mus musculus OX=10090 GN=Atp1a3 PE=1 SV=1
59.02_1810.9431n	1	#922	2	59.0213	1810.94	8.5463	QGAIVAVTGDGVNDSPALK		Q6PIC6	AT1A3_MOUSE Sodium/potassium-transporting ATPase subunit alpha-3 OS=Mus musculus OX=10090 GN=Atp1a3 PE=1 SV=1
58.82_1810.9437n	1	#8489	2	58.8152	1810.94	8.2291	QGAIVAVTGDGVNDSPALK		Q6PIC6	AT1A3_MOUSE Sodium/potassium-transporting ATPase subunit alpha-3 OS=Mus musculus OX=10090 GN=Atp1a3 PE=1 SV=1
66.97_1828.9177n	2	#129,#9423	2,3	66.9708	1828.92	8.5921	GVGIISEGNETVEDIAAR		Q6PIC6	AT1A3_MOUSE Sodium/potassium-transporting ATPase subunit alpha-3 OS=Mus musculus OX=10090 GN=Atp1a3 PE=1 SV=1
65.94_1828.9193n	1	#1928	2	65.9412	1828.92	8.283	GVGIISEGNETVEDIAAR		Q6PIC6	AT1A3_MOUSE Sodium/potassium-transporting ATPase subunit alpha-3 OS=Mus musculus OX=10090 GN=Atp1a3 PE=1 SV=1
55.48_1837.0117n	3	#2833,#198,#6197	2,3,4	55.4835	1837.01	8.4071	SAGIKVIMVTGDHPITAK		Q6PIC6	AT1A3_MOUSE Sodium/potassium-transporting ATPase subunit alpha-3 OS=Mus musculus OX=10090 GN=Atp1a3 PE=1 SV=1
52.87_1939.0358n	1	#1824	3	52.8748	1939.04	8.2494	QGAIVAVTGDGVNDSPALKK		Q6PIC6	AT1A3_MOUSE Sodium/potassium-transporting ATPase subunit alpha-3 OS=Mus musculus OX=10090 GN=Atp1a3 PE=1 SV=1
73.70_2003.0342n	1	#144518	2	73.6951	2003.03	7.7612	IMESFKNMVPQQALVIR		Q6PIC6	AT1A3_MOUSE Sodium/potassium-transporting ATPase subunit alpha-3 OS=Mus musculus OX=10090 GN=Atp1a3 PE=1 SV=1
64.64_2212.1537n	2	#60514,#9445	2,3	64.6412	2212.15	7.79	AIAKGVGIISEGNETVEDIAAR		Q6PIC6	AT1A3_MOUSE Sodium/potassium-transporting ATPase subunit alpha-3 OS=Mus musculus OX=10090 GN=Atp1a3 PE=1 SV=1
56.87_2246.1159n	1	#94913	4	56.8666	2246.12	7.2598	YNTDCVQGLTHSKAQEILAR		Q6PIC6	AT1A3_MOUSE Sodium/potassium-transporting ATPase subunit alpha-3 OS=Mus musculus OX=10090 GN=Atp1a3 PE=1 SV=1
43.91_2428.1472n	1	#56920	3	43.9114	2428.15	7.5471	IISAHGCKVDNSSLTGESEPQTR		Q6PIC6	AT1A3_MOUSE Sodium/potassium-transporting ATPase subunit alpha-3 OS=Mus musculus OX=10090 GN=Atp1a3 PE=1 SV=1
43.91_2428.1536n	1	#18222	4	43.9114	2428.15	7.5471	IISAHGCKVDNSSLTGESEPQTR		Q6PIC6	AT1A3_MOUSE Sodium/potassium-transporting ATPase subunit alpha-3 OS=Mus musculus OX=10090 GN=Atp1a3 PE=1 SV=1
44.37_2428.1597n	2	#14943,#9973	3,4	44.3689	2428.16	7.9197	IISAHGCKVDNSSLTGESEPQTR		Q6PIC6	AT1A3_MOUSE Sodium/potassium-transporting ATPase subunit alpha-3 OS=Mus musculus OX=10090 GN=Atp1a3 PE=1 SV=1
64.08_2738.3376n	1	#8750	3	64.0777	2738.34	7.4454	NLEAVETLGSTSTICSDKTGTLTQNR		Q6PIC6	AT1A3_MOUSE Sodium/potassium-transporting ATPase subunit alpha-3 OS=Mus musculus OX=10090 GN=Atp1a3 PE=1 SV=1
59.90_3030.4275n	1	#52433	4	59.8954	3030.43	6.8615	VAEIPFNSTNKYQLSIHETEDPNDNR		Q6PIC6	AT1A3_MOUSE Sodium/potassium-transporting ATPase subunit alpha-3 OS=Mus musculus OX=10090 GN=Atp1a3 PE=1 SV=1
90.28_3046.6029n	2	#154,#3219	3,4	90.28	3046.6	8.4958	GVGIISEGNETVEDIAARLNIPVSQVNPR		Q6PIC6	AT1A3_MOUSE Sodium/potassium-transporting ATPase subunit alpha-3 OS=Mus musculus OX=10090 GN=Atp1a3 PE=1 SV=1
50.01_3084.3595n	1	#78718	4	50.0089	3084.36	7.2235	VDNSSLTGESEPQTRSPDCTHDNPLETR		Q6PIC6	AT1A3_MOUSE Sodium/potassium-transporting ATPase subunit alpha-3 OS=Mus musculus OX=10090 GN=Atp1a3 PE=1 SV=1
87.48_3541.7556n	2	#2106,#5299	4,5	87.4764	3541.76	7.9847	ACVIHGTDLKDFTSEQIDEILQNHTEIVFAR		Q6PIC6	AT1A3_MOUSE Sodium/potassium-transporting ATPase subunit alpha-3 OS=Mus musculus OX=10090 GN=Atp1a3 PE=1 SV=1
78.62_5073.2816n	1	#2772	5	78.6211	5073.28	8.3454	MTVAHMWFDNQIHEADTTEDQSGTSFDKSSHTWVALSHIAGLCNR		Q6PIC6	AT1A3_MOUSE Sodium/potassium-transporting ATPase subunit alpha-3 OS=Mus musculus OX=10090 GN=Atp1a3 PE=1 SV=1
55.80_668.4222n	1	#89175	1	55.8015	668.422	0	SAGIKVI		Q9WV27	AT1A4_MOUSE Sodium/potassium-transporting ATPase subunit alpha-4 OS=Mus musculus OX=10090 GN=Atp1a4 PE=1 SV=3
52.91_1030.5615n	2	#71150,#7120	1,2	52.9098	1030.56	7.7733	LIIVEGCQR		Q9WV27	AT1A4_MOUSE Sodium/potassium-transporting ATPase subunit alpha-4 OS=Mus musculus OX=10090 GN=Atp1a4 PE=1 SV=3
53.22_1030.5646n	1	#7650	2	53.2229	1030.56	7.6827	LIIVEGCQR		Q9WV27	AT1A4_MOUSE Sodium/potassium-transporting ATPase subunit alpha-4 OS=Mus musculus OX=10090 GN=Atp1a4 PE=1 SV=3
50.91_1218.6249n	1	#3710	2	50.9105	1218.62	8.0282	VAEIPFNSTNK		Q9WV27	AT1A4_MOUSE Sodium/potassium-transporting ATPase subunit alpha-4 OS=Mus musculus OX=10090 GN=Atp1a4 PE=1 SV=3
65.36_1246.6321n	1	#65042	2	65.3576	1246.63	5.187	MTVAHLWFDK		Q9WV27	AT1A4_MOUSE Sodium/potassium-transporting ATPase subunit alpha-4 OS=Mus musculus OX=10090 GN=Atp1a4 PE=1 SV=3
60.73_1267.7013n	1	#4563	2	60.7329	1267.7	7.4172	NMVPQQALVIR		Q9WV27	AT1A4_MOUSE Sodium/potassium-transporting ATPase subunit alpha-4 OS=Mus musculus OX=10090 GN=Atp1a4 PE=1 SV=3
46.73_1553.8856n	1	#49058	3	46.726	1553.89	5.5385	LNIPISQVNNKSVK	[9] Deamidation N	Q9WV27	AT1A4_MOUSE Sodium/potassium-transporting ATPase subunit alpha-4 OS=Mus musculus OX=10090 GN=Atp1a4 PE=1 SV=3
55.48_1837.0117n	3	#2833,#198,#6197	2,3,4	55.4835	1837.01	8.152	SAGIKVIMVTGDHPITAK		Q9WV27	AT1A4_MOUSE Sodium/potassium-transporting ATPase subunit alpha-4 OS=Mus musculus OX=10090 GN=Atp1a4 PE=1 SV=3
73.70_2003.0342n	1	#144518	2	73.6951	2003.03	7.7612	IMESFKNMVPQQALVIR		Q9WV27	AT1A4_MOUSE Sodium/potassium-transporting ATPase subunit alpha-4 OS=Mus musculus OX=10090 GN=Atp1a4 PE=1 SV=3
76.69_2638.3454n	2	#10681,#2668	3,4	76.6908	2638.35	6.1742	GIVIATGDYTVMGRIASLTSGLQMGK		Q9WV27	AT1A4_MOUSE Sodium/potassium-transporting ATPase subunit alpha-4 OS=Mus musculus OX=10090 GN=Atp1a4 PE=1 SV=3
76.66_2638.3480n	2	#23231,#3597	3,4	76.6567	2638.35	6.1742	GIVIATGDYTVMGRIASLTSGLQMGK		Q9WV27	AT1A4_MOUSE Sodium/potassium-transporting ATPase subunit alpha-4 OS=Mus musculus OX=10090 GN=Atp1a4 PE=1 SV=3
76.63_2638.3490n	1	#14171	3	76.6345	2638.35	6.1742	GIVIATGDYTVMGRIASLTSGLQMGK		Q9WV27	AT1A4_MOUSE Sodium/potassium-transporting ATPase subunit alpha-4 OS=Mus musculus OX=10090 GN=Atp1a4 PE=1 SV=3
64.08_2738.3376n	1	#8750	3	64.0777	2738.34	6.9236	NLEAVETLGSTSTICSDKTGTLTQNR		Q9WV27	AT1A4_MOUSE Sodium/potassium-transporting ATPase subunit alpha-4 OS=Mus musculus OX=10090 GN=Atp1a4 PE=1 SV=3
59.90_3274.7165n	1	#8892	5	59.8954	3274.72	5.3763	GLSILEAQDILFQNGPNVLTPPPTTPEWVK	[8] Deamidation Q	Q9WV27	AT1A4_MOUSE Sodium/potassium-transporting ATPase subunit alpha-4 OS=Mus musculus OX=10090 GN=Atp1a4 PE=1 SV=3
64.03_1488.8644n	1	#2018	2	64.0322	1488.86	7.0223	VAPPGLTQIPQIQK		P14094	AT1B1_MOUSE Sodium/potassium-transporting ATPase subunit beta-1 OS=Mus musculus OX=10090 GN=Atp1b1 PE=1 SV=1
38.47_2376.2459n	1	#41745	5	38.4661	2376.25	5.3038	YLQPLLAVQFTNLTVDTEIR	[N-term] Acetyl N-TERM|[9] Deamidation Q	P14094	AT1B1_MOUSE Sodium/potassium-transporting ATPase subunit beta-1 OS=Mus musculus OX=10090 GN=Atp1b1 PE=1 SV=1
55.02_1195.7097n	2	#10031,#25425	2,3	55.0159	1195.71	6.6264	LATPGLMIRPK		P14231	AT1B2_MOUSE Sodium/potassium-transporting ATPase subunit beta-2 OS=Mus musculus OX=10090 GN=Atp1b2 PE=1 SV=2
46.21_380.2055n	1	#24281	1	46.2113	380.205	0	GIID		G5E829	AT2B1_MOUSE Plasma membrane calcium-transporting ATPase 1 OS=Mus musculus OX=10090 GN=Atp2b1 PE=1 SV=1
45.77_649.3462n	1	#173	1	45.7707	649.346	6.8033	EAVFGK		G5E829	AT2B1_MOUSE Plasma membrane calcium-transporting ATPase 1 OS=Mus musculus OX=10090 GN=Atp2b1 PE=1 SV=1
40.65_901.4160n	1	#100618	2	40.651	901.416	5.135	QDGAIENR		G5E829	AT2B1_MOUSE Plasma membrane calcium-transporting ATPase 1 OS=Mus musculus OX=10090 GN=Atp2b1 PE=1 SV=1
55.76_955.4401n	1	#190105	1	55.7597	955.44	5.8845	FFDIDSGR		G5E829	AT2B1_MOUSE Plasma membrane calcium-transporting ATPase 1 OS=Mus musculus OX=10090 GN=Atp2b1 PE=1 SV=1
55.74_955.4442n	1	#93076	1	55.7389	955.444	5.8845	FFDIDSGR		G5E829	AT2B1_MOUSE Plasma membrane calcium-transporting ATPase 1 OS=Mus musculus OX=10090 GN=Atp2b1 PE=1 SV=1
49.08_984.4882n	1	#209378	2	49.0812	984.488	5.8564	VYTFNSVR		G5E829	AT2B1_MOUSE Plasma membrane calcium-transporting ATPase 1 OS=Mus musculus OX=10090 GN=Atp2b1 PE=1 SV=1
51.59_1002.5343n	1	#16129	2	51.5896	1002.53	6.4901	CQRAGITVR		G5E829	AT2B1_MOUSE Plasma membrane calcium-transporting ATPase 1 OS=Mus musculus OX=10090 GN=Atp2b1 PE=1 SV=1
46.19_1203.6096n	1	#18567	2	46.1941	1203.61	7.2163	GIIDSTVSEQR		G5E829	AT2B1_MOUSE Plasma membrane calcium-transporting ATPase 1 OS=Mus musculus OX=10090 GN=Atp2b1 PE=1 SV=1
46.78_1203.6113n	1	#5569	2	46.7775	1203.61	7.0228	GIIDSTVSEQR		G5E829	AT2B1_MOUSE Plasma membrane calcium-transporting ATPase 1 OS=Mus musculus OX=10090 GN=Atp2b1 PE=1 SV=1
46.98_1203.6118n	1	#13219	2	46.9778	1203.61	7.0706	GIIDSTVSEQR		G5E829	AT2B1_MOUSE Plasma membrane calcium-transporting ATPase 1 OS=Mus musculus OX=10090 GN=Atp2b1 PE=1 SV=1
51.43_1388.6392n	1	#116765	2	51.4331	1388.64	6.4818	AQDGAAMEMQPLK		G5E829	AT2B1_MOUSE Plasma membrane calcium-transporting ATPase 1 OS=Mus musculus OX=10090 GN=Atp2b1 PE=1 SV=1
46.64_1493.7401n	1	#84662	3	46.6402	1493.74	5.8016	SSLYEGLEKPESR		G5E829	AT2B1_MOUSE Plasma membrane calcium-transporting ATPase 1 OS=Mus musculus OX=10090 GN=Atp2b1 PE=1 SV=1
51.36_1601.7427n	1	#49884	3	51.3612	1601.74	6.5046	SSIHNFMTHPEFR		G5E829	AT2B1_MOUSE Plasma membrane calcium-transporting ATPase 1 OS=Mus musculus OX=10090 GN=Atp2b1 PE=1 SV=1
49.81_1640.8362n	1	#22989	2	49.8083	1640.84	7.2464	QVVAVTGDGTNDGPALK		G5E829	AT2B1_MOUSE Plasma membrane calcium-transporting ATPase 1 OS=Mus musculus OX=10090 GN=Atp2b1 PE=1 SV=1
50.22_1640.8367n	1	#2927	2	50.2239	1640.84	7.7324	QVVAVTGDGTNDGPALK		G5E829	AT2B1_MOUSE Plasma membrane calcium-transporting ATPase 1 OS=Mus musculus OX=10090 GN=Atp2b1 PE=1 SV=1
38.35_1643.8001n	1	#96154	3	38.346	1643.8	6.8111	IDESSLTGESDHVKK		G5E829	AT2B1_MOUSE Plasma membrane calcium-transporting ATPase 1 OS=Mus musculus OX=10090 GN=Atp2b1 PE=1 SV=1
38.72_1643.8101n	1	#36403	3	38.7235	1643.81	6.2255	IDESSLTGESDHVKK		G5E829	AT2B1_MOUSE Plasma membrane calcium-transporting ATPase 1 OS=Mus musculus OX=10090 GN=Atp2b1 PE=1 SV=1
49.60_1655.7752n	1	#29078	2	49.6002	1655.78	7.0156	TSPNEGLSGNPADLER		G5E829	AT2B1_MOUSE Plasma membrane calcium-transporting ATPase 1 OS=Mus musculus OX=10090 GN=Atp2b1 PE=1 SV=1
43.88_1768.9234n	1	#46339	2	43.8771	1768.92	7.2309	QVVAVTGDGTNDGPALKK		G5E829	AT2B1_MOUSE Plasma membrane calcium-transporting ATPase 1 OS=Mus musculus OX=10090 GN=Atp2b1 PE=1 SV=1
45.89_1811.8720n	1	#58075	2	45.8909	1811.87	6.123	TSPNEGLSGNPADLERR		G5E829	AT2B1_MOUSE Plasma membrane calcium-transporting ATPase 1 OS=Mus musculus OX=10090 GN=Atp2b1 PE=1 SV=1
45.91_1811.8764n	1	#18798	3	45.9081	1811.88	5.9344	TSPNEGLSGNPADLERR		G5E829	AT2B1_MOUSE Plasma membrane calcium-transporting ATPase 1 OS=Mus musculus OX=10090 GN=Atp2b1 PE=1 SV=1
48.14_1896.9452n	1	#67224	3	48.1392	1896.95	7.3057	LKTSPNEGLSGNPADLER		G5E829	AT2B1_MOUSE Plasma membrane calcium-transporting ATPase 1 OS=Mus musculus OX=10090 GN=Atp2b1 PE=1 SV=1
48.12_1896.9494n	1	#212762	2	48.1221	1896.95	7.3057	LKTSPNEGLSGNPADLER		G5E829	AT2B1_MOUSE Plasma membrane calcium-transporting ATPase 1 OS=Mus musculus OX=10090 GN=Atp2b1 PE=1 SV=1
48.62_1896.9510n	1	#10546	3	48.6199	1896.95	7.3807	LKTSPNEGLSGNPADLER		G5E829	AT2B1_MOUSE Plasma membrane calcium-transporting ATPase 1 OS=Mus musculus OX=10090 GN=Atp2b1 PE=1 SV=1
48.57_1896.9527n	1	#56511	2	48.5683	1896.95	7.3807	LKTSPNEGLSGNPADLER		G5E829	AT2B1_MOUSE Plasma membrane calcium-transporting ATPase 1 OS=Mus musculus OX=10090 GN=Atp2b1 PE=1 SV=1
48.31_1896.9544n	1	#48682	3	48.3109	1896.95	7.1635	LKTSPNEGLSGNPADLER		G5E829	AT2B1_MOUSE Plasma membrane calcium-transporting ATPase 1 OS=Mus musculus OX=10090 GN=Atp2b1 PE=1 SV=1
59.95_2111.0503n	1	#17856	3	59.9492	2111.05	6.9149	SLDKDPLLLSGTHVMEGSGR		G5E829	AT2B1_MOUSE Plasma membrane calcium-transporting ATPase 1 OS=Mus musculus OX=10090 GN=Atp2b1 PE=1 SV=1
60.17_2111.0670n	2	#33211,#6772	2,3	60.1672	2111.07	6.9149	SLDKDPLLLSGTHVMEGSGR		G5E829	AT2B1_MOUSE Plasma membrane calcium-transporting ATPase 1 OS=Mus musculus OX=10090 GN=Atp2b1 PE=1 SV=1
44.32_2932.3951n	2	#177118,#32451	3,4	44.3175	2932.4	6.0358	NSSPPPSPNKNNNAVDSGIHLTIEMNK	[N-term] Acetyl N-TERM|[25] Oxidation M	G5E829	AT2B1_MOUSE Plasma membrane calcium-transporting ATPase 1 OS=Mus musculus OX=10090 GN=Atp2b1 PE=1 SV=1
73.25_5281.9109n	1	#923	5	73.2499	5281.91	6.1441	RPWLAECTPIYIQYFVKFFIIGVTVLVVAVPEGLPLAVTISLAYSVK	[7] Carboxymethyl C|[13] Deamidation Q	G5E829	AT2B1_MOUSE Plasma membrane calcium-transporting ATPase 1 OS=Mus musculus OX=10090 GN=Atp2b1 PE=1 SV=1
52.43_450.2269n	1	#84496	1	52.426	450.227	0	EFR		Q9R0K7	AT2B2_MOUSE Plasma membrane calcium-transporting ATPase 2 OS=Mus musculus OX=10090 GN=Atp2b2 PE=1 SV=2
52.52_547.2758n	1	#91833	2	52.5165	547.276	0	PEFR		Q9R0K7	AT2B2_MOUSE Plasma membrane calcium-transporting ATPase 2 OS=Mus musculus OX=10090 GN=Atp2b2 PE=1 SV=2
57.40_926.4655n	1	#36238	1	57.4037	926.466	0	PGTAPDLEK		Q9R0K7	AT2B2_MOUSE Plasma membrane calcium-transporting ATPase 2 OS=Mus musculus OX=10090 GN=Atp2b2 PE=1 SV=2
49.08_984.4882n	1	#209378	2	49.0812	984.488	5.8564	VYTFNSVR		Q9R0K7	AT2B2_MOUSE Plasma membrane calcium-transporting ATPase 2 OS=Mus musculus OX=10090 GN=Atp2b2 PE=1 SV=2
51.59_1002.5343n	1	#16129	2	51.5896	1002.53	6.4901	CQRAGITVR		Q9R0K7	AT2B2_MOUSE Plasma membrane calcium-transporting ATPase 2 OS=Mus musculus OX=10090 GN=Atp2b2 PE=1 SV=2
46.64_1493.7401n	1	#84662	3	46.6402	1493.74	5.8016	SSLYEGLEKPESR		Q9R0K7	AT2B2_MOUSE Plasma membrane calcium-transporting ATPase 2 OS=Mus musculus OX=10090 GN=Atp2b2 PE=1 SV=2
43.60_1497.7148n	1	#121045	2	43.6025	1497.71	5.8666	IKETYGDTEAICR		Q9R0K7	AT2B2_MOUSE Plasma membrane calcium-transporting ATPase 2 OS=Mus musculus OX=10090 GN=Atp2b2 PE=1 SV=2
43.62_1497.7381n	1	#49665	3	43.6197	1497.74	6.7967	IKETYGDTEAICR		Q9R0K7	AT2B2_MOUSE Plasma membrane calcium-transporting ATPase 2 OS=Mus musculus OX=10090 GN=Atp2b2 PE=1 SV=2
53.15_1516.7112n	1	#17745	2	53.153	1516.71	6.2579	QQDGAAAMEMQPLK		Q9R0K7	AT2B2_MOUSE Plasma membrane calcium-transporting ATPase 2 OS=Mus musculus OX=10090 GN=Atp2b2 PE=1 SV=2
52.64_1585.7451n	1	#17141	4	52.6425	1585.75	7.1211	TSIHNFMAHPEFR		Q9R0K7	AT2B2_MOUSE Plasma membrane calcium-transporting ATPase 2 OS=Mus musculus OX=10090 GN=Atp2b2 PE=1 SV=2
52.50_1585.7506n	1	#4219	3	52.499	1585.75	7.1211	TSIHNFMAHPEFR		Q9R0K7	AT2B2_MOUSE Plasma membrane calcium-transporting ATPase 2 OS=Mus musculus OX=10090 GN=Atp2b2 PE=1 SV=2
52.90_1585.7572n	2	#41035,#48924	2,4	52.8981	1585.76	6.865	TSIHNFMAHPEFR		Q9R0K7	AT2B2_MOUSE Plasma membrane calcium-transporting ATPase 2 OS=Mus musculus OX=10090 GN=Atp2b2 PE=1 SV=2
52.85_1585.7575n	1	#17048	3	52.8516	1585.76	6.865	TSIHNFMAHPEFR		Q9R0K7	AT2B2_MOUSE Plasma membrane calcium-transporting ATPase 2 OS=Mus musculus OX=10090 GN=Atp2b2 PE=1 SV=2
49.81_1640.8362n	1	#22989	2	49.8083	1640.84	7.2464	QVVAVTGDGTNDGPALK		Q9R0K7	AT2B2_MOUSE Plasma membrane calcium-transporting ATPase 2 OS=Mus musculus OX=10090 GN=Atp2b2 PE=1 SV=2
50.22_1640.8367n	1	#2927	2	50.2239	1640.84	7.7324	QVVAVTGDGTNDGPALK		Q9R0K7	AT2B2_MOUSE Plasma membrane calcium-transporting ATPase 2 OS=Mus musculus OX=10090 GN=Atp2b2 PE=1 SV=2
47.90_1715.8302n	1	#72789	2	47.9047	1715.83	6.27	AKQQDGAAAMEMQPLK		Q9R0K7	AT2B2_MOUSE Plasma membrane calcium-transporting ATPase 2 OS=Mus musculus OX=10090 GN=Atp2b2 PE=1 SV=2
54.39_1749.8349n	1	#20046	2	54.3901	1749.83	6.2848	NNSAIDSGINLTTDTSK		Q9R0K7	AT2B2_MOUSE Plasma membrane calcium-transporting ATPase 2 OS=Mus musculus OX=10090 GN=Atp2b2 PE=1 SV=2
43.88_1768.9234n	1	#46339	2	43.8771	1768.92	7.2309	QVVAVTGDGTNDGPALKK		Q9R0K7	AT2B2_MOUSE Plasma membrane calcium-transporting ATPase 2 OS=Mus musculus OX=10090 GN=Atp2b2 PE=1 SV=2
57.30_1850.9906n	1	#45384	2	57.3025	1850.99	6.4885	LKTSPVEGLPGTAPDLEK		Q9R0K7	AT2B2_MOUSE Plasma membrane calcium-transporting ATPase 2 OS=Mus musculus OX=10090 GN=Atp2b2 PE=1 SV=2
54.39_2114.9854n	1	#30457	4	54.3901	2114.99	5.2493	SVDKDPMLLSGTHVMEGSGR		Q9R0K7	AT2B2_MOUSE Plasma membrane calcium-transporting ATPase 2 OS=Mus musculus OX=10090 GN=Atp2b2 PE=1 SV=2
54.44_2114.9992n	1	#154791	2	54.4368	2115	6.1406	SVDKDPMLLSGTHVMEGSGR		Q9R0K7	AT2B2_MOUSE Plasma membrane calcium-transporting ATPase 2 OS=Mus musculus OX=10090 GN=Atp2b2 PE=1 SV=2
57.16_2489.3850n	1	#63405	5	57.1639	2489.39	5.4144	NILGHAVYQLTLIFTLLFVGEK	[1] Deamidation N	Q9R0K7	AT2B2_MOUSE Plasma membrane calcium-transporting ATPase 2 OS=Mus musculus OX=10090 GN=Atp2b2 PE=1 SV=2
82.61_2611.4536n	1	#111229	5	82.6143	2611.45	5.822	TLELLVNAIAINSAYTTKILPPEK		Q9R0K7	AT2B2_MOUSE Plasma membrane calcium-transporting ATPase 2 OS=Mus musculus OX=10090 GN=Atp2b2 PE=1 SV=2
74.55_2760.3441n	1	#3894	4	74.5517	2760.34	6.2229	MTVVQAYVGDVHYKEIPDPSSINAK		Q9R0K7	AT2B2_MOUSE Plasma membrane calcium-transporting ATPase 2 OS=Mus musculus OX=10090 GN=Atp2b2 PE=1 SV=2
74.55_2760.3523n	1	#10947	3	74.5517	2760.35	6.2229	MTVVQAYVGDVHYKEIPDPSSINAK		Q9R0K7	AT2B2_MOUSE Plasma membrane calcium-transporting ATPase 2 OS=Mus musculus OX=10090 GN=Atp2b2 PE=1 SV=2
49.08_984.4882n	1	#209378	2	49.0812	984.488	5.8564	VYTFNSVR		Q6Q477	AT2B4_MOUSE Plasma membrane calcium-transporting ATPase 4 OS=Mus musculus OX=10090 GN=Atp2b4 PE=1 SV=1
49.81_1640.8362n	1	#22989	2	49.8083	1640.84	7.2464	QVVAVTGDGTNDGPALK		Q6Q477	AT2B4_MOUSE Plasma membrane calcium-transporting ATPase 4 OS=Mus musculus OX=10090 GN=Atp2b4 PE=1 SV=1
50.22_1640.8367n	1	#2927	2	50.2239	1640.84	7.7324	QVVAVTGDGTNDGPALK		Q6Q477	AT2B4_MOUSE Plasma membrane calcium-transporting ATPase 4 OS=Mus musculus OX=10090 GN=Atp2b4 PE=1 SV=1
38.35_1643.8001n	1	#96154	3	38.346	1643.8	6.8111	IDESSLTGESDHVKK		Q6Q477	AT2B4_MOUSE Plasma membrane calcium-transporting ATPase 4 OS=Mus musculus OX=10090 GN=Atp2b4 PE=1 SV=1
38.72_1643.8101n	1	#36403	3	38.7235	1643.81	6.2255	IDESSLTGESDHVKK		Q6Q477	AT2B4_MOUSE Plasma membrane calcium-transporting ATPase 4 OS=Mus musculus OX=10090 GN=Atp2b4 PE=1 SV=1
43.88_1768.9234n	1	#46339	2	43.8771	1768.92	7.2309	QVVAVTGDGTNDGPALKK		Q6Q477	AT2B4_MOUSE Plasma membrane calcium-transporting ATPase 4 OS=Mus musculus OX=10090 GN=Atp2b4 PE=1 SV=1
38.11_1896.0345n	1	#156760	5	38.1058	1896.03	5.3695	VVKLFHNNHEVAHKPK		Q6Q477	AT2B4_MOUSE Plasma membrane calcium-transporting ATPase 4 OS=Mus musculus OX=10090 GN=Atp2b4 PE=1 SV=1
38.09_1896.0461n	1	#113426	4	38.0887	1896.05	5.3549	VVKLFHNNHEVAHKPK		Q6Q477	AT2B4_MOUSE Plasma membrane calcium-transporting ATPase 4 OS=Mus musculus OX=10090 GN=Atp2b4 PE=1 SV=1
96.05_3460.7419n	1	#26092	4	96.0518	3460.74	5.8772	APLNSPPSQHYTIVFNTFVLMQLFNEINAR		Q6Q477	AT2B4_MOUSE Plasma membrane calcium-transporting ATPase 4 OS=Mus musculus OX=10090 GN=Atp2b4 PE=1 SV=1
43.34_1054.5443n	1	#78396	2	43.3449	1054.54	7.1132	GGDRVPADIR		Q64436	ATP4A_MOUSE Potassium-transporting ATPase alpha chain 1 OS=Mus musculus OX=10090 GN=Atp4a PE=1 SV=3
40.67_1413.7871n	1	#94282	3	40.6682	1413.79	5.4862	AAFKSGQDAVPVPK		Q64436	ATP4A_MOUSE Potassium-transporting ATPase alpha chain 1 OS=Mus musculus OX=10090 GN=Atp4a PE=1 SV=3
36.33_1618.7470n	1	#2140	2	36.3328	1618.75	8.2397	VDNSSLTGESEPQTR		Q64436	ATP4A_MOUSE Potassium-transporting ATPase alpha chain 1 OS=Mus musculus OX=10090 GN=Atp4a PE=1 SV=3
37.44_1618.7498n	2	#692,#139170	2,3	37.4424	1618.75	8.2069	VDNSSLTGESEPQTR		Q64436	ATP4A_MOUSE Potassium-transporting ATPase alpha chain 1 OS=Mus musculus OX=10090 GN=Atp4a PE=1 SV=3
69.32_1756.9693n	1	#40991	3	69.3209	1756.97	5.7628	TIIGRIASLASGVENEK		Q64436	ATP4A_MOUSE Potassium-transporting ATPase alpha chain 1 OS=Mus musculus OX=10090 GN=Atp4a PE=1 SV=3
52.08_1501.7786n	1	#60964	3	52.0796	1501.78	6.6374	ANVAKPGLVDDFEK		Q9DCX2	ATP5H_MOUSE ATP synthase subunit d_ mitochondrial OS=Mus musculus OX=10090 GN=Atp5pd PE=1 SV=3
47.97_1629.8646n	1	#23091	3	47.9677	1629.86	7.1816	ANVAKPGLVDDFEKK		Q9DCX2	ATP5H_MOUSE ATP synthase subunit d_ mitochondrial OS=Mus musculus OX=10090 GN=Atp5pd PE=1 SV=3
52.94_1813.9200n	1	#30996	4	52.9447	1813.92	6.0708	AIGNALKSWNETFHAR		Q9DCX2	ATP5H_MOUSE ATP synthase subunit d_ mitochondrial OS=Mus musculus OX=10090 GN=Atp5pd PE=1 SV=3
69.87_1978.9957n	1	#22423	2	69.8667	1979	7.2612	LASLSEKPPAIDWAYYR		Q9DCX2	ATP5H_MOUSE ATP synthase subunit d_ mitochondrial OS=Mus musculus OX=10090 GN=Atp5pd PE=1 SV=3
69.84_1979.0063n	1	#6345	3	69.8434	1979.01	7.2612	LASLSEKPPAIDWAYYR		Q9DCX2	ATP5H_MOUSE ATP synthase subunit d_ mitochondrial OS=Mus musculus OX=10090 GN=Atp5pd PE=1 SV=3
52.33_1330.6662n	1	#6515	2	52.33	1330.67	7.9115	ELAEAQDDSILK		Q06185	ATP5I_MOUSE ATP synthase subunit e_ mitochondrial OS=Mus musculus OX=10090 GN=Atp5me PE=1 SV=2
52.67_1330.6674n	1	#1635	2	52.6656	1330.67	8.2832	ELAEAQDDSILK		Q06185	ATP5I_MOUSE ATP synthase subunit e_ mitochondrial OS=Mus musculus OX=10090 GN=Atp5me PE=1 SV=2
67.18_1356.7214n	1	#12638	2	67.1782	1356.72	6.6596	YSALIIGMAYGAK		Q06185	ATP5I_MOUSE ATP synthase subunit e_ mitochondrial OS=Mus musculus OX=10090 GN=Atp5me PE=1 SV=2
53.11_1728.8852n	1	#9581	2	53.1071	1728.89	8.4075	IERELAEAQDDSILK		Q06185	ATP5I_MOUSE ATP synthase subunit e_ mitochondrial OS=Mus musculus OX=10090 GN=Atp5me PE=1 SV=2
53.13_1728.8897n	1	#4415	3	53.1303	1728.89	8.4075	IERELAEAQDDSILK		Q06185	ATP5I_MOUSE ATP synthase subunit e_ mitochondrial OS=Mus musculus OX=10090 GN=Atp5me PE=1 SV=2
48.45_889.5364n	1	#10412	2	48.4482	889.536	8.2702	LFVDKIR		P97450	ATP5J_MOUSE ATP synthase-coupling factor 6_ mitochondrial OS=Mus musculus OX=10090 GN=Atp5pf PE=1 SV=1
46.79_1061.5416n	2	#100086,#7420	1,2	46.7861	1061.54	7.4267	FEVIDKPQS		P97450	ATP5J_MOUSE ATP synthase-coupling factor 6_ mitochondrial OS=Mus musculus OX=10090 GN=Atp5pf PE=1 SV=1
51.47_1132.6158n	2	#27742,#63890	2,3	51.4682	1132.62	7.1315	NIGVTAVAFNK		P97450	ATP5J_MOUSE ATP synthase-coupling factor 6_ mitochondrial OS=Mus musculus OX=10090 GN=Atp5pf PE=1 SV=1
56.66_1132.6259n	1	#24807	3	56.6569	1132.63	7.1281	NIGVTAVAFNK		P97450	ATP5J_MOUSE ATP synthase-coupling factor 6_ mitochondrial OS=Mus musculus OX=10090 GN=Atp5pf PE=1 SV=1
52.27_1288.6898n	2	#54159,#126402	2,3	52.2738	1288.69	6.746	RNIGVTAVAFNK		P97450	ATP5J_MOUSE ATP synthase-coupling factor 6_ mitochondrial OS=Mus musculus OX=10090 GN=Atp5pf PE=1 SV=1
55.92_1663.8113n	1	#20166	3	55.9244	1663.81	8.1304	FDDPKFEVIDKPQS		P97450	ATP5J_MOUSE ATP synthase-coupling factor 6_ mitochondrial OS=Mus musculus OX=10090 GN=Atp5pf PE=1 SV=1
56.24_1663.8136n	2	#4245,#3517	2,3	56.2446	1663.81	8.0405	FDDPKFEVIDKPQS		P97450	ATP5J_MOUSE ATP synthase-coupling factor 6_ mitochondrial OS=Mus musculus OX=10090 GN=Atp5pf PE=1 SV=1
58.33_2043.9512n	1	#9313	2	58.3259	2043.95	8.7501	QASGGPVDIGPEYQQDLDR		P97450	ATP5J_MOUSE ATP synthase-coupling factor 6_ mitochondrial OS=Mus musculus OX=10090 GN=Atp5pf PE=1 SV=1
66.29_2577.2361n	1	#703	3	66.2856	2577.24	8.6643	QASGGPVDIGPEYQQDLDRELYK		P97450	ATP5J_MOUSE ATP synthase-coupling factor 6_ mitochondrial OS=Mus musculus OX=10090 GN=Atp5pf PE=1 SV=1
54.77_384.2485n	1	#4487	1	54.7721	384.249	0	IPR		Q03265	ATPA_MOUSE ATP synthase subunit alpha_ mitochondrial OS=Mus musculus OX=10090 GN=Atp5f1a PE=1 SV=1
47.01_417.2422n	1	#106683	1	47.0121	417.242	0	TGIK		Q03265	ATPA_MOUSE ATP synthase subunit alpha_ mitochondrial OS=Mus musculus OX=10090 GN=Atp5f1a PE=1 SV=1
55.00_497.3333n	1	#129091	1	55.0044	497.333	0	IIPR		Q03265	ATPA_MOUSE ATP synthase subunit alpha_ mitochondrial OS=Mus musculus OX=10090 GN=Atp5f1a PE=1 SV=1
54.77_554.3516n	1	#79043	1	54.7721	554.352	0	GIIPR		Q03265	ATPA_MOUSE ATP synthase subunit alpha_ mitochondrial OS=Mus musculus OX=10090 GN=Atp5f1a PE=1 SV=1
54.77_554.3542n	1	#37255	1	54.7721	554.354	0	GIIPR		Q03265	ATPA_MOUSE ATP synthase subunit alpha_ mitochondrial OS=Mus musculus OX=10090 GN=Atp5f1a PE=1 SV=1
54.77_622.3808n	1	#8236	1	54.7721	622.381	0	VGLKAPG		Q03265	ATPA_MOUSE ATP synthase subunit alpha_ mitochondrial OS=Mus musculus OX=10090 GN=Atp5f1a PE=1 SV=1
54.77_651.4073n	2	#8501,#94834	1,2	54.7721	651.407	0	PGIIPR		Q03265	ATPA_MOUSE ATP synthase subunit alpha_ mitochondrial OS=Mus musculus OX=10090 GN=Atp5f1a PE=1 SV=1
54.77_722.4415n	1	#46580	1	54.7721	722.442	5.908	APGIIPR		Q03265	ATPA_MOUSE ATP synthase subunit alpha_ mitochondrial OS=Mus musculus OX=10090 GN=Atp5f1a PE=1 SV=1
55.00_722.4419n	1	#178814	1	55.0044	722.442	5.7989	APGIIPR		Q03265	ATPA_MOUSE ATP synthase subunit alpha_ mitochondrial OS=Mus musculus OX=10090 GN=Atp5f1a PE=1 SV=1
54.77_722.4432n	1	#30551	1	54.7721	722.443	5.908	APGIIPR		Q03265	ATPA_MOUSE ATP synthase subunit alpha_ mitochondrial OS=Mus musculus OX=10090 GN=Atp5f1a PE=1 SV=1
54.75_735.4622n	1	#36772	1	54.7488	735.462	0	VGLKAPGI		Q03265	ATPA_MOUSE ATP synthase subunit alpha_ mitochondrial OS=Mus musculus OX=10090 GN=Atp5f1a PE=1 SV=1
54.77_735.4639n	1	#6226	1	54.7721	735.464	0	VGLKAPGI		Q03265	ATPA_MOUSE ATP synthase subunit alpha_ mitochondrial OS=Mus musculus OX=10090 GN=Atp5f1a PE=1 SV=1
55.63_787.4144n	1	#12805	1	55.6311	787.414	0	SIGDGIAR		Q03265	ATPA_MOUSE ATP synthase subunit alpha_ mitochondrial OS=Mus musculus OX=10090 GN=Atp5f1a PE=1 SV=1
55.65_787.4192n	1	#6154	1	55.6539	787.419	0	SIGDGIAR		Q03265	ATPA_MOUSE ATP synthase subunit alpha_ mitochondrial OS=Mus musculus OX=10090 GN=Atp5f1a PE=1 SV=1
47.72_814.4469n	1	#151716	2	47.7157	814.447	6.8109	ELIIGDR		Q03265	ATPA_MOUSE ATP synthase subunit alpha_ mitochondrial OS=Mus musculus OX=10090 GN=Atp5f1a PE=1 SV=1
47.13_814.4493n	1	#4271	1	47.1322	814.449	6.9836	ELIIGDR		Q03265	ATPA_MOUSE ATP synthase subunit alpha_ mitochondrial OS=Mus musculus OX=10090 GN=Atp5f1a PE=1 SV=1
47.15_814.4546n	1	#13162	1	47.1494	814.455	6.9836	ELIIGDR		Q03265	ATPA_MOUSE ATP synthase subunit alpha_ mitochondrial OS=Mus musculus OX=10090 GN=Atp5f1a PE=1 SV=1
55.65_999.5718n	2	#10283,#871	1,2	55.6539	999.572	7.6771	VLSIGDGIAR		Q03265	ATPA_MOUSE ATP synthase subunit alpha_ mitochondrial OS=Mus musculus OX=10090 GN=Atp5f1a PE=1 SV=1
59.50_1025.5838n	1	#43679	1	59.504	1025.58	7.3164	AVDSLVPIGR		Q03265	ATPA_MOUSE ATP synthase subunit alpha_ mitochondrial OS=Mus musculus OX=10090 GN=Atp5f1a PE=1 SV=1
59.46_1025.5862n	1	#8562	2	59.4567	1025.59	7.3164	AVDSLVPIGR		Q03265	ATPA_MOUSE ATP synthase subunit alpha_ mitochondrial OS=Mus musculus OX=10090 GN=Atp5f1a PE=1 SV=1
54.78_1119.7125n	3	#148165,#904,#6202	1,2,3	54.7798	1119.71	7.6237	VGLKAPGIIPR		Q03265	ATPA_MOUSE ATP synthase subunit alpha_ mitochondrial OS=Mus musculus OX=10090 GN=Atp5f1a PE=1 SV=1
57.85_1155.6373n	1	#36016	2	57.8485	1155.64	5.7497	GQRELIIGDR		Q03265	ATPA_MOUSE ATP synthase subunit alpha_ mitochondrial OS=Mus musculus OX=10090 GN=Atp5f1a PE=1 SV=1
52.87_1170.6168n	1	#60063	2	52.8748	1170.62	7.2194	VVDALGNAIDGK		Q03265	ATPA_MOUSE ATP synthase subunit alpha_ mitochondrial OS=Mus musculus OX=10090 GN=Atp5f1a PE=1 SV=1
46.98_1357.7371n	1	#2708	2	46.9778	1357.74	7.8919	ISVREPMQTGIK		Q03265	ATPA_MOUSE ATP synthase subunit alpha_ mitochondrial OS=Mus musculus OX=10090 GN=Atp5f1a PE=1 SV=1
46.99_1357.7385n	1	#873	3	46.9949	1357.74	7.8919	ISVREPMQTGIK		Q03265	ATPA_MOUSE ATP synthase subunit alpha_ mitochondrial OS=Mus musculus OX=10090 GN=Atp5f1a PE=1 SV=1
46.62_1357.7394n	2	#16437,#4873	2,3	46.6231	1357.74	7.3145	ISVREPMQTGIK		Q03265	ATPA_MOUSE ATP synthase subunit alpha_ mitochondrial OS=Mus musculus OX=10090 GN=Atp5f1a PE=1 SV=1
51.50_1366.7522n	1	#35222	2	51.503	1366.75	6.7782	AVDSLVPIGRGQR		Q03265	ATPA_MOUSE ATP synthase subunit alpha_ mitochondrial OS=Mus musculus OX=10090 GN=Atp5f1a PE=1 SV=1
51.27_1366.7590n	1	#74451	3	51.2696	1366.76	6.7782	AVDSLVPIGRGQR		Q03265	ATPA_MOUSE ATP synthase subunit alpha_ mitochondrial OS=Mus musculus OX=10090 GN=Atp5f1a PE=1 SV=1
58.84_1422.6773n	1	#5508	2	58.8379	1422.68	7.7382	TGTAEMSSILEER		Q03265	ATPA_MOUSE ATP synthase subunit alpha_ mitochondrial OS=Mus musculus OX=10090 GN=Atp5f1a PE=1 SV=1
69.15_1437.8330n	1	#185462	3	69.1455	1437.83	5.6593	GIRPAINVGLSVSR		Q03265	ATPA_MOUSE ATP synthase subunit alpha_ mitochondrial OS=Mus musculus OX=10090 GN=Atp5f1a PE=1 SV=1
59.78_1471.8337n	1	#11187	3	59.7833	1471.83	7.6097	TSIAIDTIINQKR		Q03265	ATPA_MOUSE ATP synthase subunit alpha_ mitochondrial OS=Mus musculus OX=10090 GN=Atp5f1a PE=1 SV=1
58.91_1471.8360n	1	#133305	3	58.9063	1471.84	7.4623	TSIAIDTIINQKR		Q03265	ATPA_MOUSE ATP synthase subunit alpha_ mitochondrial OS=Mus musculus OX=10090 GN=Atp5f1a PE=1 SV=1
83.62_1513.8530n	1	#13577	2	83.6198	1513.85	6.169	TSIAIDTIINQKR	[N-term] Acetyl N-TERM	Q03265	ATPA_MOUSE ATP synthase subunit alpha_ mitochondrial OS=Mus musculus OX=10090 GN=Atp5f1a PE=1 SV=1
68.77_1576.8211n	1	#28719	2	68.7689	1576.82	5.4077	LKEIVTNFLAGFEP		Q03265	ATPA_MOUSE ATP synthase subunit alpha_ mitochondrial OS=Mus musculus OX=10090 GN=Atp5f1a PE=1 SV=1
78.03_1623.8802n	1	#3673	2	78.0264	1623.88	7.6137	TGAIVDVPVGEELLGR		Q03265	ATPA_MOUSE ATP synthase subunit alpha_ mitochondrial OS=Mus musculus OX=10090 GN=Atp5f1a PE=1 SV=1
56.38_1709.9252n	1	#136962	2	56.3795	1709.93	7.8421	VVDALGNAIDGKGPIGSK		Q03265	ATPA_MOUSE ATP synthase subunit alpha_ mitochondrial OS=Mus musculus OX=10090 GN=Atp5f1a PE=1 SV=1
56.36_1709.9287n	1	#14883	3	56.3568	1709.93	7.8421	VVDALGNAIDGKGPIGSK		Q03265	ATPA_MOUSE ATP synthase subunit alpha_ mitochondrial OS=Mus musculus OX=10090 GN=Atp5f1a PE=1 SV=1
56.73_1709.9304n	2	#22035,#3981	2,3	56.7268	1709.93	7.7639	VVDALGNAIDGKGPIGSK		Q03265	ATPA_MOUSE ATP synthase subunit alpha_ mitochondrial OS=Mus musculus OX=10090 GN=Atp5f1a PE=1 SV=1
50.32_1729.9826n	1	#155333	4	50.316	1729.98	5.5419	QTGKTSIAIDTIINQK		Q03265	ATPA_MOUSE ATP synthase subunit alpha_ mitochondrial OS=Mus musculus OX=10090 GN=Atp5f1a PE=1 SV=1
77.32_2409.2853n	1	#147855	3	77.3188	2409.29	6.4307	FENAFLSHVISQHQSLLGNIR		Q03265	ATPA_MOUSE ATP synthase subunit alpha_ mitochondrial OS=Mus musculus OX=10090 GN=Atp5f1a PE=1 SV=1
84.47_2457.2848n	1	#7353	3	84.4699	2457.28	6.9066	GMSLNLEPDNVGVVVFGNDKLIK		Q03265	ATPA_MOUSE ATP synthase subunit alpha_ mitochondrial OS=Mus musculus OX=10090 GN=Atp5f1a PE=1 SV=1
70.99_542.2702n	1	#49942	1	70.99	542.27	0	VLDSGA		P56480	ATPB_MOUSE ATP synthase subunit beta_ mitochondrial OS=Mus musculus OX=10090 GN=Atp5f1b PE=1 SV=2
61.82_774.4374n	1	#48479	2	61.8176	774.437	5.4439	MLSLVGR		P56480	ATPB_MOUSE ATP synthase subunit beta_ mitochondrial OS=Mus musculus OX=10090 GN=Atp5f1b PE=1 SV=2
54.80_974.5377n	1	#20589	2	54.7953	974.538	6.1658	IGLFGGAGVGK		P56480	ATPB_MOUSE ATP synthase subunit beta_ mitochondrial OS=Mus musculus OX=10090 GN=Atp5f1b PE=1 SV=2
55.86_1261.6358n	1	#5443	2	55.8619	1261.64	7.4641	TIAMDGTEGLVR		P56480	ATPB_MOUSE ATP synthase subunit beta_ mitochondrial OS=Mus musculus OX=10090 GN=Atp5f1b PE=1 SV=2
56.24_1261.6358n	1	#581	2	56.2446	1261.64	7.8309	TIAMDGTEGLVR		P56480	ATPB_MOUSE ATP synthase subunit beta_ mitochondrial OS=Mus musculus OX=10090 GN=Atp5f1b PE=1 SV=2
50.03_1574.7989n	1	#42496	2	50.0263	1574.8	7.3866	TIAMDGTEGLVRGQK		P56480	ATPB_MOUSE ATP synthase subunit beta_ mitochondrial OS=Mus musculus OX=10090 GN=Atp5f1b PE=1 SV=2
50.03_1574.8050n	1	#30690	3	50.0263	1574.81	7.3866	TIAMDGTEGLVRGQK		P56480	ATPB_MOUSE ATP synthase subunit beta_ mitochondrial OS=Mus musculus OX=10090 GN=Atp5f1b PE=1 SV=2
63.26_1649.9056n	1	#14417	3	63.2636	1649.91	7.6238	LVLEVAQHLGESTVR		P56480	ATPB_MOUSE ATP synthase subunit beta_ mitochondrial OS=Mus musculus OX=10090 GN=Atp5f1b PE=1 SV=2
63.24_1649.9077n	1	#13243	2	63.2409	1649.91	7.6238	LVLEVAQHLGESTVR		P56480	ATPB_MOUSE ATP synthase subunit beta_ mitochondrial OS=Mus musculus OX=10090 GN=Atp5f1b PE=1 SV=2
61.66_1779.9395n	1	#10343	2	61.6644	1779.94	7.0671	IMNVIGEPIDERGPIK		P56480	ATPB_MOUSE ATP synthase subunit beta_ mitochondrial OS=Mus musculus OX=10090 GN=Atp5f1b PE=1 SV=2
61.66_1779.9431n	1	#5161	3	61.6644	1779.94	7.0671	IMNVIGEPIDERGPIK		P56480	ATPB_MOUSE ATP synthase subunit beta_ mitochondrial OS=Mus musculus OX=10090 GN=Atp5f1b PE=1 SV=2
55.82_1841.8750n	1	#15429	3	55.8209	1841.88	7.1134	IMDPNIVGNEHYDVAR		P56480	ATPB_MOUSE ATP synthase subunit beta_ mitochondrial OS=Mus musculus OX=10090 GN=Atp5f1b PE=1 SV=2
70.98_1918.0886n	2	#2579,#288	2,3	70.9779	1918.09	7.9251	VLDSGAPIKIPVGPETLGR		P56480	ATPB_MOUSE ATP synthase subunit beta_ mitochondrial OS=Mus musculus OX=10090 GN=Atp5f1b PE=1 SV=2
80.78_1987.0187n	1	#12326	2	80.7785	1987.02	7.1958	AIAELGIYPAVDPLDSTSR		P56480	ATPB_MOUSE ATP synthase subunit beta_ mitochondrial OS=Mus musculus OX=10090 GN=Atp5f1b PE=1 SV=2
80.30_1987.0245n	1	#69918	2	80.2982	1987.02	7.4821	AIAELGIYPAVDPLDSTSR		P56480	ATPB_MOUSE ATP synthase subunit beta_ mitochondrial OS=Mus musculus OX=10090 GN=Atp5f1b PE=1 SV=2
44.52_2420.2278n	1	#46501	3	44.5234	2420.23	5.4876	IQRFLSQPFQVAEVFTGHMGK	[10] Deamidation Q	P56480	ATPB_MOUSE ATP synthase subunit beta_ mitochondrial OS=Mus musculus OX=10090 GN=Atp5f1b PE=1 SV=2
75.61_768.4742n	1	#1675	1	75.6076	768.474	5.9525	LPASLLR		Q9D3D9	ATPD_MOUSE ATP synthase subunit delta_ mitochondrial OS=Mus musculus OX=10090 GN=Atp5f1d PE=1 SV=1
43.29_985.5358n	1	#52501	2	43.2934	985.536	6.7083	IEANEALVK		Q9D3D9	ATPD_MOUSE ATP synthase subunit delta_ mitochondrial OS=Mus musculus OX=10090 GN=Atp5f1d PE=1 SV=1
38.36_1374.6486n	1	#98096	2	38.3632	1374.65	7.5282	AQSELSGAADEAAR		Q9D3D9	ATPD_MOUSE ATP synthase subunit delta_ mitochondrial OS=Mus musculus OX=10090 GN=Atp5f1d PE=1 SV=1
42.05_1929.9449n	1	#30112	3	42.0466	1929.94	5.9474	ANLEKAQSELSGAADEAAR		Q9D3D9	ATPD_MOUSE ATP synthase subunit delta_ mitochondrial OS=Mus musculus OX=10090 GN=Atp5f1d PE=1 SV=1
58.78_1581.8890n	2	#57195,#16897	2,3	58.7794	1581.89	6.928	LVRPPVQVYGIEGR		Q9DB20	ATPO_MOUSE ATP synthase subunit O_ mitochondrial OS=Mus musculus OX=10090 GN=Atp5po PE=1 SV=1
51.45_2077.0716n	2	#147494,#20610	2,3	51.4505	2077.07	6.2394	IMRPDDANVAGNVHGGTILK		Q91V12	BACH_MOUSE Cytosolic acyl coenzyme A thioester hydrolase OS=Mus musculus OX=10090 GN=Acot7 PE=1 SV=2
51.69_2077.1545n	2	#8347,#7397	4,5	51.6882	2077.15	6.2394	IMRPDDANVAGNVHGGTILK		Q91V12	BACH_MOUSE Cytosolic acyl coenzyme A thioester hydrolase OS=Mus musculus OX=10090 GN=Acot7 PE=1 SV=2
47.34_1334.6436n	1	#284	2	47.3381	1334.64	6.1814	EWLKDTCGANAK		O54962	BAF_MOUSE Barrier-to-autointegration factor OS=Mus musculus OX=10090 GN=Banf1 PE=1 SV=1
61.82_586.3273n	1	#43406	1	61.8176	586.327	5.2965	SAPLLS		Q8BKX1	BAIP2_MOUSE Brain-specific angiogenesis inhibitor 1-associated protein 2 OS=Mus musculus OX=10090 GN=Baiap2 PE=1 SV=2
50.03_1167.5935n	1	#9413	2	50.0263	1167.59	7.1981	AFPTQTAGTFK		Q8BKX1	BAIP2_MOUSE Brain-specific angiogenesis inhibitor 1-associated protein 2 OS=Mus musculus OX=10090 GN=Baiap2 PE=1 SV=2
58.55_1446.7112n	1	#7096	2	58.5517	1446.71	6.2373	MRGWFPFSYTR		Q8BKX1	BAIP2_MOUSE Brain-specific angiogenesis inhibitor 1-associated protein 2 OS=Mus musculus OX=10090 GN=Baiap2 PE=1 SV=2
44.80_1478.7667n	1	#28220	2	44.7979	1478.77	7.6439	LSDSYSNTLPVRK		Q8BKX1	BAIP2_MOUSE Brain-specific angiogenesis inhibitor 1-associated protein 2 OS=Mus musculus OX=10090 GN=Baiap2 PE=1 SV=2
45.21_1478.7709n	2	#8648,#2273	2,3	45.2127	1478.77	7.9759	LSDSYSNTLPVRK		Q8BKX1	BAIP2_MOUSE Brain-specific angiogenesis inhibitor 1-associated protein 2 OS=Mus musculus OX=10090 GN=Baiap2 PE=1 SV=2
44.80_1478.7741n	1	#10767	3	44.7979	1478.77	7.6439	LSDSYSNTLPVRK		Q8BKX1	BAIP2_MOUSE Brain-specific angiogenesis inhibitor 1-associated protein 2 OS=Mus musculus OX=10090 GN=Baiap2 PE=1 SV=2
48.79_1984.9739n	2	#20484,#26272	3,4	48.7941	1984.97	7.3317	VLDSDGSDRLHMSLQQGK		Q8BKX1	BAIP2_MOUSE Brain-specific angiogenesis inhibitor 1-associated protein 2 OS=Mus musculus OX=10090 GN=Baiap2 PE=1 SV=2
48.31_1984.9861n	1	#48466	4	48.3109	1984.99	6.7267	VLDSDGSDRLHMSLQQGK		Q8BKX1	BAIP2_MOUSE Brain-specific angiogenesis inhibitor 1-associated protein 2 OS=Mus musculus OX=10090 GN=Baiap2 PE=1 SV=2
67.41_2296.1256n	1	#8521	3	67.4082	2296.13	6.7316	QRPYSVAVPAFSQGLDDYGAR		Q8BKX1	BAIP2_MOUSE Brain-specific angiogenesis inhibitor 1-associated protein 2 OS=Mus musculus OX=10090 GN=Baiap2 PE=1 SV=2
65.89_2605.2746n	1	#18006	3	65.8948	2605.27	6.8426	SSSTGNLLDKDDLALPPPDYGTSSR		Q8BKX1	BAIP2_MOUSE Brain-specific angiogenesis inhibitor 1-associated protein 2 OS=Mus musculus OX=10090 GN=Baiap2 PE=1 SV=2
92.95_2779.5569n	1	#8522	3	92.948	2779.56	7.3341	SNLVISDPIPGAKPLPVPPELAPFVGR		Q8BKX1	BAIP2_MOUSE Brain-specific angiogenesis inhibitor 1-associated protein 2 OS=Mus musculus OX=10090 GN=Baiap2 PE=1 SV=2
67.50_3076.3664n	1	#8157	3	67.4994	3076.37	7.6137	MSAQENVPVMNGVAGPDSEDYNPWADRK		Q8BKX1	BAIP2_MOUSE Brain-specific angiogenesis inhibitor 1-associated protein 2 OS=Mus musculus OX=10090 GN=Baiap2 PE=1 SV=2
67.16_3076.3694n	1	#52718	3	67.1556	3076.37	7.4927	MSAQENVPVMNGVAGPDSEDYNPWADRK		Q8BKX1	BAIP2_MOUSE Brain-specific angiogenesis inhibitor 1-associated protein 2 OS=Mus musculus OX=10090 GN=Baiap2 PE=1 SV=2
69.10_3077.3451n	1	#71998	3	69.0979	3077.35	6.3245	MSAQENVPVMNGVAGPDSEDYNPWADRK	[22] Deamidation N	Q8BKX1	BAIP2_MOUSE Brain-specific angiogenesis inhibitor 1-associated protein 2 OS=Mus musculus OX=10090 GN=Baiap2 PE=1 SV=2
71.25_3445.6976n	1	#7301	4	71.2515	3445.7	7.0793	AFPTQTAGTFKQRPYSVAVPAFSQGLDDYGAR		Q8BKX1	BAIP2_MOUSE Brain-specific angiogenesis inhibitor 1-associated protein 2 OS=Mus musculus OX=10090 GN=Baiap2 PE=1 SV=2
45.86_950.4808n	1	#33607	1	45.8565	950.481	0	PGPAAGGEAPK		Q91XV3	BASP1_MOUSE Brain acid soluble protein 1 OS=Mus musculus OX=10090 GN=Basp1 PE=1 SV=3
45.91_950.4818n	1	#36337	1	45.9081	950.482	0	PGPAAGGEAPK		Q91XV3	BASP1_MOUSE Brain acid soluble protein 1 OS=Mus musculus OX=10090 GN=Basp1 PE=1 SV=3
28.90_1315.6235n	1	#210901	2	28.8984	1315.62	8.4171	ETPAASEAPSSAAK		Q91XV3	BASP1_MOUSE Brain acid soluble protein 1 OS=Mus musculus OX=10090 GN=Basp1 PE=1 SV=3
31.71_1315.6255n	1	#215528	2	31.7119	1315.63	8.1682	ETPAASEAPSSAAK		Q91XV3	BASP1_MOUSE Brain acid soluble protein 1 OS=Mus musculus OX=10090 GN=Basp1 PE=1 SV=3
39.50_1444.6707n	2	#246,#94369	2,3	39.4985	1444.67	9.4372	ESEPQAAADATEVK		Q91XV3	BASP1_MOUSE Brain acid soluble protein 1 OS=Mus musculus OX=10090 GN=Basp1 PE=1 SV=3
38.21_1444.6732n	1	#44082	2	38.2088	1444.67	8.6242	ESEPQAAADATEVK		Q91XV3	BASP1_MOUSE Brain acid soluble protein 1 OS=Mus musculus OX=10090 GN=Basp1 PE=1 SV=3
29.90_2056.9535n	1	#92455	3	29.9048	2056.95	8.8604	SDAAPAASDSKPSSAEPAPSSK		Q91XV3	BASP1_MOUSE Brain acid soluble protein 1 OS=Mus musculus OX=10090 GN=Basp1 PE=1 SV=3
36.08_2074.8936n	2	#1005,#5048	2,3	36.0755	2074.89	10.2351	AGEASAESTGAADGAAPEEGEAK		Q91XV3	BASP1_MOUSE Brain acid soluble protein 1 OS=Mus musculus OX=10090 GN=Basp1 PE=1 SV=3
34.95_2074.8958n	2	#580,#1747	2,3	34.9459	2074.9	10.159	AGEASAESTGAADGAAPEEGEAK		Q91XV3	BASP1_MOUSE Brain acid soluble protein 1 OS=Mus musculus OX=10090 GN=Basp1 PE=1 SV=3
33.07_2202.9820n	1	#99600	3	33.0729	2202.98	9.1054	AGEASAESTGAADGAAPEEGEAKK		Q91XV3	BASP1_MOUSE Brain acid soluble protein 1 OS=Mus musculus OX=10090 GN=Basp1 PE=1 SV=3
33.52_2202.9832n	1	#41453	3	33.519	2202.98	9.472	AGEASAESTGAADGAAPEEGEAKK		Q91XV3	BASP1_MOUSE Brain acid soluble protein 1 OS=Mus musculus OX=10090 GN=Basp1 PE=1 SV=3
31.66_2202.9869n	1	#181096	3	31.6604	2202.99	8.5442	AGEASAESTGAADGAAPEEGEAKK		Q91XV3	BASP1_MOUSE Brain acid soluble protein 1 OS=Mus musculus OX=10090 GN=Basp1 PE=1 SV=3
40.26_2373.1241n	2	#408,#296	3,4	40.265	2373.12	9.9093	ESEPQAAADATEVKESTEEKPK		Q91XV3	BASP1_MOUSE Brain acid soluble protein 1 OS=Mus musculus OX=10090 GN=Basp1 PE=1 SV=3
39.86_2373.1249n	2	#2991,#2295	3,4	39.8589	2373.12	9.2162	ESEPQAAADATEVKESTEEKPK		Q91XV3	BASP1_MOUSE Brain acid soluble protein 1 OS=Mus musculus OX=10090 GN=Basp1 PE=1 SV=3
42.24_2701.2273n	1	#330	3	42.2354	2701.23	9.9844	AEGAGTEEEGTPKESEPQAAADATEVK		Q91XV3	BASP1_MOUSE Brain acid soluble protein 1 OS=Mus musculus OX=10090 GN=Basp1 PE=1 SV=3
53.73_2728.3623n	1	#3240	3	53.7301	2728.36	9.3679	APAPAAPAAAEPQAEAPAAAASSEQSVAVK		Q91XV3	BASP1_MOUSE Brain acid soluble protein 1 OS=Mus musculus OX=10090 GN=Basp1 PE=1 SV=3
53.49_2728.3674n	1	#4998	3	53.4923	2728.37	9.7208	APAPAAPAAAEPQAEAPAAAASSEQSVAVK		Q91XV3	BASP1_MOUSE Brain acid soluble protein 1 OS=Mus musculus OX=10090 GN=Basp1 PE=1 SV=3
54.41_2857.4074n	1	#496	3	54.4139	2857.41	9.8029	APAPAAPAAAEPQAEAPAAAASSEQSVAVKE		Q91XV3	BASP1_MOUSE Brain acid soluble protein 1 OS=Mus musculus OX=10090 GN=Basp1 PE=1 SV=3
54.01_2857.4119n	1	#1296	3	54.0131	2857.41	9.5795	APAPAAPAAAEPQAEAPAAAASSEQSVAVKE		Q91XV3	BASP1_MOUSE Brain acid soluble protein 1 OS=Mus musculus OX=10090 GN=Basp1 PE=1 SV=3
47.87_3010.3779n	1	#26924	4	47.8702	3010.38	9.7934	SEGAAEEQPEPAPAPEQEAAAPGPAAGGEAPK		Q91XV3	BASP1_MOUSE Brain acid soluble protein 1 OS=Mus musculus OX=10090 GN=Basp1 PE=1 SV=3
47.27_3010.3869n	1	#1355	3	47.2695	3010.39	9.7307	SEGAAEEQPEPAPAPEQEAAAPGPAAGGEAPK		Q91XV3	BASP1_MOUSE Brain acid soluble protein 1 OS=Mus musculus OX=10090 GN=Basp1 PE=1 SV=3
47.98_3010.3879n	1	#459	3	47.9848	3010.39	9.7934	SEGAAEEQPEPAPAPEQEAAAPGPAAGGEAPK		Q91XV3	BASP1_MOUSE Brain acid soluble protein 1 OS=Mus musculus OX=10090 GN=Basp1 PE=1 SV=3
40.48_3130.4429n	2	#13275,#4282	3,4	40.4795	3130.44	9.7376	ESEPQAAADATEVKESTEEKPKDAADGEAK		Q91XV3	BASP1_MOUSE Brain acid soluble protein 1 OS=Mus musculus OX=10090 GN=Basp1 PE=1 SV=3
40.95_3130.4438n	3	#4364,#787,#1012	3,4,5	40.9484	3130.44	10.2978	ESEPQAAADATEVKESTEEKPKDAADGEAK		Q91XV3	BASP1_MOUSE Brain acid soluble protein 1 OS=Mus musculus OX=10090 GN=Basp1 PE=1 SV=3
37.08_3354.5697n	1	#26311	3	37.082	3354.57	9.7767	SDAAPAASDSKPSSAEPAPSSKETPAASEAPSSAAK		Q91XV3	BASP1_MOUSE Brain acid soluble protein 1 OS=Mus musculus OX=10090 GN=Basp1 PE=1 SV=3
37.00_3354.5707n	1	#3896	4	36.9962	3354.57	9.7767	SDAAPAASDSKPSSAEPAPSSKETPAASEAPSSAAK		Q91XV3	BASP1_MOUSE Brain acid soluble protein 1 OS=Mus musculus OX=10090 GN=Basp1 PE=1 SV=3
37.99_3354.5718n	2	#4216,#438	3,4	37.9943	3354.57	9.8736	SDAAPAASDSKPSSAEPAPSSKETPAASEAPSSAAK		Q91XV3	BASP1_MOUSE Brain acid soluble protein 1 OS=Mus musculus OX=10090 GN=Basp1 PE=1 SV=3
42.36_3429.5730n	1	#108248	4	42.3555	3429.57	0	GAGTEEEGTPKESEPQAAADATEVKESTEEKPK		Q91XV3	BASP1_MOUSE Brain acid soluble protein 1 OS=Mus musculus OX=10090 GN=Basp1 PE=1 SV=3
45.82_3564.6515n	1	#389	4	45.8222	3564.65	9.484	AEPEKSEGAAEEQPEPAPAPEQEAAAPGPAAGGEAPK		Q91XV3	BASP1_MOUSE Brain acid soluble protein 1 OS=Mus musculus OX=10090 GN=Basp1 PE=1 SV=3
41.81_3629.6690n	1	#9924	4	41.8121	3629.67	9.7033	AEGAGTEEEGTPKESEPQAAADATEVKESTEEKPK		Q91XV3	BASP1_MOUSE Brain acid soluble protein 1 OS=Mus musculus OX=10090 GN=Basp1 PE=1 SV=3
41.79_3629.6691n	1	#5063	5	41.795	3629.67	9.7033	AEGAGTEEEGTPKESEPQAAADATEVKESTEEKPK		Q91XV3	BASP1_MOUSE Brain acid soluble protein 1 OS=Mus musculus OX=10090 GN=Basp1 PE=1 SV=3
42.36_3629.6705n	2	#1361,#638	4,5	42.3555	3629.67	10.0732	AEGAGTEEEGTPKESEPQAAADATEVKESTEEKPK		Q91XV3	BASP1_MOUSE Brain acid soluble protein 1 OS=Mus musculus OX=10090 GN=Basp1 PE=1 SV=3
42.54_4386.9961n	2	#10240,#2531	4,5	42.5442	4387	9.872	AEGAGTEEEGTPKESEPQAAADATEVKESTEEKPKDAADGEAK		Q91XV3	BASP1_MOUSE Brain acid soluble protein 1 OS=Mus musculus OX=10090 GN=Basp1 PE=1 SV=3
49.41_939.5378n	1	#47046	1	49.4091	939.538	7.201	AGPTSLPLGK		Q80YN3	BCAS1_MOUSE Breast carcinoma-amplified sequence 1 homolog OS=Mus musculus OX=10090 GN=Bcas1 PE=1 SV=3
49.48_939.5397n	1	#2340	2	49.4778	939.54	7.201	AGPTSLPLGK		Q80YN3	BCAS1_MOUSE Breast carcinoma-amplified sequence 1 homolog OS=Mus musculus OX=10090 GN=Bcas1 PE=1 SV=3
41.45_1376.6453n	1	#291	3	41.4518	1376.65	6.2236	DTENSPTTSANLK		Q80YN3	BCAS1_MOUSE Breast carcinoma-amplified sequence 1 homolog OS=Mus musculus OX=10090 GN=Bcas1 PE=1 SV=3
38.95_1505.7352n	1	#32765	2	38.9466	1505.74	6.8199	TPSPPEPEPAGTAQK		Q80YN3	BCAS1_MOUSE Breast carcinoma-amplified sequence 1 homolog OS=Mus musculus OX=10090 GN=Bcas1 PE=1 SV=3
79.21_1513.8611n	2	#9431,#11117	2,3	79.2087	1513.86	6.8604	AGPTSLPLGKLFWK		Q80YN3	BCAS1_MOUSE Breast carcinoma-amplified sequence 1 homolog OS=Mus musculus OX=10090 GN=Bcas1 PE=1 SV=3
41.50_1633.7417n	1	#26518	2	41.5033	1633.74	6.0414	SCSPPPPPPEPTSEGR		Q80YN3	BCAS1_MOUSE Breast carcinoma-amplified sequence 1 homolog OS=Mus musculus OX=10090 GN=Bcas1 PE=1 SV=3
53.78_1983.9988n	1	#18787	3	53.7781	1984	7.3428	RMSDAQVQTDPVSIGPVGK		Q80YN3	BCAS1_MOUSE Breast carcinoma-amplified sequence 1 homolog OS=Mus musculus OX=10090 GN=Bcas1 PE=1 SV=3
53.73_1984.0027n	1	#23049	2	53.7301	1984	7.3428	RMSDAQVQTDPVSIGPVGK		Q80YN3	BCAS1_MOUSE Breast carcinoma-amplified sequence 1 homolog OS=Mus musculus OX=10090 GN=Bcas1 PE=1 SV=3
35.00_2056.8770n	1	#159165	3	35.0002	2056.88	5.518	SEESNVKDSSCQTSNSVEK		Q80YN3	BCAS1_MOUSE Breast carcinoma-amplified sequence 1 homolog OS=Mus musculus OX=10090 GN=Bcas1 PE=1 SV=3
35.50_2056.8821n	1	#146238	2	35.4978	2056.88	5.1886	SEESNVKDSSCQTSNSVEK		Q80YN3	BCAS1_MOUSE Breast carcinoma-amplified sequence 1 homolog OS=Mus musculus OX=10090 GN=Bcas1 PE=1 SV=3
55.10_2508.1955n	1	#12102	3	55.0968	2508.2	5.8271	EPAPCVQPPTVEANAMQTGDKTPK		Q80YN3	BCAS1_MOUSE Breast carcinoma-amplified sequence 1 homolog OS=Mus musculus OX=10090 GN=Bcas1 PE=1 SV=3
41.47_2694.3062n	1	#155596	4	41.4689	2694.31	5.7299	QEVREPAPCVQPPTVEANAMQTGDK		Q80YN3	BCAS1_MOUSE Breast carcinoma-amplified sequence 1 homolog OS=Mus musculus OX=10090 GN=Bcas1 PE=1 SV=3
50.15_2845.3007n	1	#48404	5	50.1519	2845.3	5.6813	LEEVESSLQTVDLSEETQPEPTDVK	[N-term] Acetyl N-TERM|[9] Deamidation Q|[18] Deamidation Q	Q80YN3	BCAS1_MOUSE Breast carcinoma-amplified sequence 1 homolog OS=Mus musculus OX=10090 GN=Bcas1 PE=1 SV=3
49.83_3169.5284n	1	#16213	5	49.8255	3169.53	6.1162	FDVSPSAAPENKDPSEHGALPVAAAPGQAPDK		Q80YN3	BCAS1_MOUSE Breast carcinoma-amplified sequence 1 homolog OS=Mus musculus OX=10090 GN=Bcas1 PE=1 SV=3
74.46_4503.1167n	1	#152145	4	74.4577	4503.12	5.6612	GQDVDTLSYSVPGDPEVPGTTKEDPQVVDTTENSSSIMSFFK		Q80YN3	BCAS1_MOUSE Breast carcinoma-amplified sequence 1 homolog OS=Mus musculus OX=10090 GN=Bcas1 PE=1 SV=3
50.01_501.3161n	1	#24936	1	50.0089	501.316	0	LLEK		O08539	BIN1_MOUSE Myc box-dependent-interacting protein 1 OS=Mus musculus OX=10090 GN=Bin1 PE=1 SV=1
49.64_1096.6850n	1	#8651	2	49.6355	1096.68	7.9294	IAKPVSLLEK		O08539	BIN1_MOUSE Myc box-dependent-interacting protein 1 OS=Mus musculus OX=10090 GN=Bin1 PE=1 SV=1
49.71_1096.6854n	1	#8679	3	49.7051	1096.69	7.9294	IAKPVSLLEK		O08539	BIN1_MOUSE Myc box-dependent-interacting protein 1 OS=Mus musculus OX=10090 GN=Bin1 PE=1 SV=1
60.32_1194.5746n	1	#11371	2	60.3169	1194.57	7.0125	GVFPENFTER		O08539	BIN1_MOUSE Myc box-dependent-interacting protein 1 OS=Mus musculus OX=10090 GN=Bin1 PE=1 SV=1
59.83_1194.6035n	1	#17039	2	59.828	1194.6	6.1732	GVFPENFTER		O08539	BIN1_MOUSE Myc box-dependent-interacting protein 1 OS=Mus musculus OX=10090 GN=Bin1 PE=1 SV=1
59.81_1194.6035n	1	#12610	2	59.8056	1194.6	6.1732	GVFPENFTER		O08539	BIN1_MOUSE Myc box-dependent-interacting protein 1 OS=Mus musculus OX=10090 GN=Bin1 PE=1 SV=1
64.51_1421.6987n	1	#4933	2	64.5146	1421.7	7.0626	GVFPENFTERVQ		O08539	BIN1_MOUSE Myc box-dependent-interacting protein 1 OS=Mus musculus OX=10090 GN=Bin1 PE=1 SV=1
41.43_1857.8935n	2	#13120,#4032	2,3	41.426	1857.89	8.2826	VNHEPEPASGASPGATIPK		O08539	BIN1_MOUSE Myc box-dependent-interacting protein 1 OS=Mus musculus OX=10090 GN=Bin1 PE=1 SV=1
41.94_1857.9208n	2	#11459,#1357	2,3	41.9408	1857.92	8.2407	VNHEPEPASGASPGATIPK		O08539	BIN1_MOUSE Myc box-dependent-interacting protein 1 OS=Mus musculus OX=10090 GN=Bin1 PE=1 SV=1
43.20_1858.9024n	2	#27665,#8296	2,3	43.1991	1858.9	7.884	VNHEPEPASGASPGATIPK	[2] Deamidation N	O08539	BIN1_MOUSE Myc box-dependent-interacting protein 1 OS=Mus musculus OX=10090 GN=Bin1 PE=1 SV=1
42.66_1858.9037n	1	#121987	2	42.6643	1858.9	7.7552	VNHEPEPASGASPGATIPK	[2] Deamidation N	O08539	BIN1_MOUSE Myc box-dependent-interacting protein 1 OS=Mus musculus OX=10090 GN=Bin1 PE=1 SV=1
44.27_2132.0279n	2	#37078,#12008	3,4	44.266	2132.03	6.5757	LVDYDSARHHYESLQTAK		O08539	BIN1_MOUSE Myc box-dependent-interacting protein 1 OS=Mus musculus OX=10090 GN=Bin1 PE=1 SV=1
57.50_2171.9380n	1	#139919	2	57.4959	2171.94	6.172	ADETKDEQFEQCVQNFNK		O08539	BIN1_MOUSE Myc box-dependent-interacting protein 1 OS=Mus musculus OX=10090 GN=Bin1 PE=1 SV=1
47.84_2526.2645n	1	#55897	4	47.8358	2526.26	6.6435	VNHEPEPASGASPGATIPKSPSQLR		O08539	BIN1_MOUSE Myc box-dependent-interacting protein 1 OS=Mus musculus OX=10090 GN=Bin1 PE=1 SV=1
71.29_2697.3600n	2	#12800,#3179	3,4	71.2871	2697.36	6.4379	LNQNLNDVLVSLEKQHGSNTFTVK		O08539	BIN1_MOUSE Myc box-dependent-interacting protein 1 OS=Mus musculus OX=10090 GN=Bin1 PE=1 SV=1
63.22_1216.6178n	1	#13493	2	63.2183	1216.62	6.1858	DAGTIAGLNVMR		P20029	BIP_MOUSE Endoplasmic reticulum chaperone BiP OS=Mus musculus OX=10090 GN=Hspa5 PE=1 SV=3
50.43_1429.6966n	1	#15418	2	50.426	1429.7	7.0275	TWNDPSVQQDIK		P20029	BIP_MOUSE Endoplasmic reticulum chaperone BiP OS=Mus musculus OX=10090 GN=Hspa5 PE=1 SV=3
50.65_1429.7097n	1	#63249	2	50.6469	1429.71	6.4446	TWNDPSVQQDIK		P20029	BIP_MOUSE Endoplasmic reticulum chaperone BiP OS=Mus musculus OX=10090 GN=Hspa5 PE=1 SV=3
68.79_1459.7485n	1	#11685	2	68.7924	1459.75	6.2525	SDIDEIVLVGGSTR		P20029	BIP_MOUSE Endoplasmic reticulum chaperone BiP OS=Mus musculus OX=10090 GN=Hspa5 PE=1 SV=3
45.74_1554.8039n	1	#152496	2	45.7363	1554.8	5.829	NGRVEIIANDQGNR		P20029	BIP_MOUSE Endoplasmic reticulum chaperone BiP OS=Mus musculus OX=10090 GN=Hspa5 PE=1 SV=3
54.98_1676.8033n	1	#13379	2	54.9809	1676.8	6.5323	NQLTSNPENTVFDAK		P20029	BIP_MOUSE Endoplasmic reticulum chaperone BiP OS=Mus musculus OX=10090 GN=Hspa5 PE=1 SV=3
72.01_1794.9288n	1	#46061	3	72.0087	1794.93	6.1517	TFAPEEISAMVLTKMK		P20029	BIP_MOUSE Endoplasmic reticulum chaperone BiP OS=Mus musculus OX=10090 GN=Hspa5 PE=1 SV=3
50.52_1832.9052n	1	#10790	3	50.5186	1832.91	7.2407	NQLTSNPENTVFDAKR		P20029	BIP_MOUSE Endoplasmic reticulum chaperone BiP OS=Mus musculus OX=10090 GN=Hspa5 PE=1 SV=3
50.43_1832.9170n	1	#39190	3	50.426	1832.92	7.2407	NQLTSNPENTVFDAKR		P20029	BIP_MOUSE Endoplasmic reticulum chaperone BiP OS=Mus musculus OX=10090 GN=Hspa5 PE=1 SV=3
50.37_1832.9192n	2	#51002,#186190	2,4	50.3709	1832.92	7.2407	NQLTSNPENTVFDAKR		P20029	BIP_MOUSE Endoplasmic reticulum chaperone BiP OS=Mus musculus OX=10090 GN=Hspa5 PE=1 SV=3
58.91_1919.0245n	1	#72427	4	58.9063	1919.02	5.5897	IQQLVKEFFNGKEPSR		P20029	BIP_MOUSE Endoplasmic reticulum chaperone BiP OS=Mus musculus OX=10090 GN=Hspa5 PE=1 SV=3
45.39_2176.9949n	1	#200724	3	45.3931	2176.99	4.6702	LYGSGGPPPTGEEDTSEKDEL		P20029	BIP_MOUSE Endoplasmic reticulum chaperone BiP OS=Mus musculus OX=10090 GN=Hspa5 PE=1 SV=3
50.76_1675.8374n	1	#23073	2	50.7583	1675.84	6.2962	SVSGASTGLSSSPLSSPR		Q5RJI5	BRSK1_MOUSE Serine/threonine-protein kinase BRSK1 OS=Mus musculus OX=10090 GN=Brsk1 PE=1 SV=1
64.38_1748.8104n	1	#36762	2	64.3763	1748.81	6.3771	SPVFSFSPEPGAGDEAR		Q5RJI5	BRSK1_MOUSE Serine/threonine-protein kinase BRSK1 OS=Mus musculus OX=10090 GN=Brsk1 PE=1 SV=1
42.25_2213.1180n	3	#143946,#3845,#5490	2,4,5	42.2525	2213.12	5.0935	RDGSSGGGIYSVTFTLISGPSR		Q5RJI5	BRSK1_MOUSE Serine/threonine-protein kinase BRSK1 OS=Mus musculus OX=10090 GN=Brsk1 PE=1 SV=1
54.91_2232.0862n	1	#73487	2	54.9115	2232.09	6.5341	ASPTGTPGTTPPPSPGGGVGGAAWR		Q5RJI5	BRSK1_MOUSE Serine/threonine-protein kinase BRSK1 OS=Mus musculus OX=10090 GN=Brsk1 PE=1 SV=1
37.69_2475.2251n	2	#6731,#15474	4,5	37.6912	2475.23	5.4802	ASPTGTPGTTPPPSPGGGVGGAAWRSR		Q5RJI5	BRSK1_MOUSE Serine/threonine-protein kinase BRSK1 OS=Mus musculus OX=10090 GN=Brsk1 PE=1 SV=1
59.04_2686.3975n	1	#26815	4	59.0443	2686.4	5.5091	STPLPGPPGSPRSSGGTPLHSPLHTPR		Q5RJI5	BRSK1_MOUSE Serine/threonine-protein kinase BRSK1 OS=Mus musculus OX=10090 GN=Brsk1 PE=1 SV=1
76.62_3385.7137n	3	#690,#17,#16	3,4,5	76.6196	3385.71	5.3171	QIVSALDFCHSYSICHRDLKPENLLLDEK		Q5RJI5	BRSK1_MOUSE Serine/threonine-protein kinase BRSK1 OS=Mus musculus OX=10090 GN=Brsk1 PE=1 SV=1
55.95_1684.7758n	1	#6970	2	55.9456	1684.78	5.6598	FQVDITYTEGGEAQK		Q69Z98	BRSK2_MOUSE Serine/threonine-protein kinase BRSK2 OS=Mus musculus OX=10090 GN=Brsk2 PE=1 SV=2
52.54_241.1425n	1	#95656	1	52.5359	241.143	0	ALG		O88737	BSN_MOUSE Protein bassoon OS=Mus musculus OX=10090 GN=Bsn PE=1 SV=4
56.09_425.2356n	1	#163408	1	56.0852	425.236	0	GPPR		O88737	BSN_MOUSE Protein bassoon OS=Mus musculus OX=10090 GN=Bsn PE=1 SV=4
46.75_1021.5530n	2	#95916,#24272	1,2	46.7518	1021.55	5.9816	LTEAVSAFGK		O88737	BSN_MOUSE Protein bassoon OS=Mus musculus OX=10090 GN=Bsn PE=1 SV=4
52.26_1162.5528n	1	#22775	2	52.2552	1162.55	7.2475	ALGMDMTTAPR		O88737	BSN_MOUSE Protein bassoon OS=Mus musculus OX=10090 GN=Bsn PE=1 SV=4
52.50_1162.5534n	1	#32493	2	52.499	1162.55	6.94	ALGMDMTTAPR		O88737	BSN_MOUSE Protein bassoon OS=Mus musculus OX=10090 GN=Bsn PE=1 SV=4
51.99_1162.5608n	1	#41513	2	51.989	1162.56	7.0487	ALGMDMTTAPR		O88737	BSN_MOUSE Protein bassoon OS=Mus musculus OX=10090 GN=Bsn PE=1 SV=4
52.37_1162.5937n	1	#19924	2	52.369	1162.59	6.94	ALGMDMTTAPR		O88737	BSN_MOUSE Protein bassoon OS=Mus musculus OX=10090 GN=Bsn PE=1 SV=4
51.43_1219.6903n	1	#70995	3	51.4331	1219.69	6.9822	YLELGITQRK		O88737	BSN_MOUSE Protein bassoon OS=Mus musculus OX=10090 GN=Bsn PE=1 SV=4
51.64_1219.6903n	1	#138407	2	51.6429	1219.69	7.33	YLELGITQRK		O88737	BSN_MOUSE Protein bassoon OS=Mus musculus OX=10090 GN=Bsn PE=1 SV=4
51.63_1219.6950n	1	#84928	3	51.6252	1219.7	7.33	YLELGITQRK		O88737	BSN_MOUSE Protein bassoon OS=Mus musculus OX=10090 GN=Bsn PE=1 SV=4
51.33_1224.6256n	1	#32226	2	51.3255	1224.63	6.1486	LLDTSFASSER		O88737	BSN_MOUSE Protein bassoon OS=Mus musculus OX=10090 GN=Bsn PE=1 SV=4
46.64_1275.6843n	1	#105183	3	46.6402	1275.68	6.1814	GQPKIVFSDASK		O88737	BSN_MOUSE Protein bassoon OS=Mus musculus OX=10090 GN=Bsn PE=1 SV=4
58.67_1384.7062n	1	#22486	2	58.6749	1384.71	7.4608	YNLPNQVTPLAR		O88737	BSN_MOUSE Protein bassoon OS=Mus musculus OX=10090 GN=Bsn PE=1 SV=4
59.46_1384.7287n	1	#5915	2	59.4567	1384.73	6.9792	YNLPNQVTPLAR		O88737	BSN_MOUSE Protein bassoon OS=Mus musculus OX=10090 GN=Bsn PE=1 SV=4
45.03_1392.7239n	1	#2446	2	45.0324	1392.72	7.6553	GPQGLGQPSGSLPAK		O88737	BSN_MOUSE Protein bassoon OS=Mus musculus OX=10090 GN=Bsn PE=1 SV=4
38.12_1435.7479n	1	#150034	3	38.123	1435.75	6.5127	HREEEQLLVQR		O88737	BSN_MOUSE Protein bassoon OS=Mus musculus OX=10090 GN=Bsn PE=1 SV=4
38.62_1435.7485n	1	#197316	3	38.6206	1435.75	5.9258	HREEEQLLVQR		O88737	BSN_MOUSE Protein bassoon OS=Mus musculus OX=10090 GN=Bsn PE=1 SV=4
37.53_1582.7409n	1	#21965	3	37.5282	1582.74	5.5517	RYSSVSNIYSDHR		O88737	BSN_MOUSE Protein bassoon OS=Mus musculus OX=10090 GN=Bsn PE=1 SV=4
47.60_1644.8881n	1	#198195	2	47.5956	1644.89	6.5149	TDPATPVVKPVPEAPK		O88737	BSN_MOUSE Protein bassoon OS=Mus musculus OX=10090 GN=Bsn PE=1 SV=4
47.90_1644.8930n	1	#100052	2	47.9047	1644.89	6.0501	TDPATPVVKPVPEAPK		O88737	BSN_MOUSE Protein bassoon OS=Mus musculus OX=10090 GN=Bsn PE=1 SV=4
43.21_1645.7769n	1	#109789	2	43.2076	1645.78	6.254	QAELDEEEKEIDAK		O88737	BSN_MOUSE Protein bassoon OS=Mus musculus OX=10090 GN=Bsn PE=1 SV=4
38.57_1685.7260n	1	#114856	2	38.5691	1685.73	6.4928	GQPGYPSSADYSQSSR		O88737	BSN_MOUSE Protein bassoon OS=Mus musculus OX=10090 GN=Bsn PE=1 SV=4
38.96_1685.7292n	1	#56162	2	38.9637	1685.73	6.782	GQPGYPSSADYSQSSR		O88737	BSN_MOUSE Protein bassoon OS=Mus musculus OX=10090 GN=Bsn PE=1 SV=4
48.53_1734.8878n	1	#18754	2	48.534	1734.89	7.0562	ATSVPGPTQATAPPEVGR		O88737	BSN_MOUSE Protein bassoon OS=Mus musculus OX=10090 GN=Bsn PE=1 SV=4
49.41_1734.8888n	1	#3947	2	49.4091	1734.89	7.5256	ATSVPGPTQATAPPEVGR		O88737	BSN_MOUSE Protein bassoon OS=Mus musculus OX=10090 GN=Bsn PE=1 SV=4
43.95_1755.8799n	1	#20220	3	43.9457	1755.88	6.4025	SLSDPKPLSPTAEESAK		O88737	BSN_MOUSE Protein bassoon OS=Mus musculus OX=10090 GN=Bsn PE=1 SV=4
39.80_1755.8920n	1	#15288	3	39.7988	1755.89	6.4761	QVEQAVQTAPYRGGPR		O88737	BSN_MOUSE Protein bassoon OS=Mus musculus OX=10090 GN=Bsn PE=1 SV=4
42.06_1755.9101n	1	#97999	3	42.0638	1755.91	6.0392	QVEQAVQTAPYRGGPR		O88737	BSN_MOUSE Protein bassoon OS=Mus musculus OX=10090 GN=Bsn PE=1 SV=4
40.05_1755.9400n	1	#56687	3	40.0505	1755.94	6.4761	QVEQAVQTAPYRGGPR		O88737	BSN_MOUSE Protein bassoon OS=Mus musculus OX=10090 GN=Bsn PE=1 SV=4
45.99_1796.9430n	1	#31526	3	45.9883	1796.94	6.731	AHVSPQKQFIADSTLR		O88737	BSN_MOUSE Protein bassoon OS=Mus musculus OX=10090 GN=Bsn PE=1 SV=4
43.14_1800.9928n	1	#61978	3	43.139	1800.99	6.9382	RTDPATPVVKPVPEAPK		O88737	BSN_MOUSE Protein bassoon OS=Mus musculus OX=10090 GN=Bsn PE=1 SV=4
38.65_1809.8809n	1	#157697	2	38.6549	1809.88	6.8341	EKPLSGGDSEVGAPQPSR		O88737	BSN_MOUSE Protein bassoon OS=Mus musculus OX=10090 GN=Bsn PE=1 SV=4
49.20_1938.0410n	1	#95638	2	49.2025	1938.04	6.9902	AEPVPKPPPETTVPPGTPK		O88737	BSN_MOUSE Protein bassoon OS=Mus musculus OX=10090 GN=Bsn PE=1 SV=4
47.70_1957.9380n	1	#32443	3	47.6985	1957.94	7.3702	GGEAEEPVPKPYSQDLSR		O88737	BSN_MOUSE Protein bassoon OS=Mus musculus OX=10090 GN=Bsn PE=1 SV=4
61.10_1965.9054n	1	#8523	3	61.0969	1965.91	6.3699	SVTDTALPGQSSGPFYSPR		O88737	BSN_MOUSE Protein bassoon OS=Mus musculus OX=10090 GN=Bsn PE=1 SV=4
38.66_1974.8744n	2	#218675,#72205	2,3	38.6635	1974.87	6.4875	MASAYSGEKLSSHDYSSR		O88737	BSN_MOUSE Protein bassoon OS=Mus musculus OX=10090 GN=Bsn PE=1 SV=4
58.88_2016.1329n	1	#16387	3	58.8835	2016.13	6.6959	VSPAIHITAATDPKVEIVR		O88737	BSN_MOUSE Protein bassoon OS=Mus musculus OX=10090 GN=Bsn PE=1 SV=4
52.45_2088.0279n	1	#195821	2	52.4455	2088.03	6.6634	SATTVPSGLGAGEQTQEGLTGK		O88737	BSN_MOUSE Protein bassoon OS=Mus musculus OX=10090 GN=Bsn PE=1 SV=4
52.92_2088.0300n	1	#92820	2	52.9215	2088.03	6.8562	SATTVPSGLGAGEQTQEGLTGK		O88737	BSN_MOUSE Protein bassoon OS=Mus musculus OX=10090 GN=Bsn PE=1 SV=4
41.17_2088.8430n	2	#135772,#16671	2,3	41.1686	2088.84	7.6562	SQGSFEYQDTQDHDYGGR		O88737	BSN_MOUSE Protein bassoon OS=Mus musculus OX=10090 GN=Bsn PE=1 SV=4
40.69_2088.8464n	1	#65998	3	40.6854	2088.85	7.4022	SQGSFEYQDTQDHDYGGR		O88737	BSN_MOUSE Protein bassoon OS=Mus musculus OX=10090 GN=Bsn PE=1 SV=4
72.25_2114.1296n	1	#96824	3	72.2491	2114.13	6.682	ILPGGAAEQAGKLTEAVSAFGK		O88737	BSN_MOUSE Protein bassoon OS=Mus musculus OX=10090 GN=Bsn PE=1 SV=4
72.67_2114.1321n	1	#16086	3	72.6719	2114.13	6.237	ILPGGAAEQAGKLTEAVSAFGK		O88737	BSN_MOUSE Protein bassoon OS=Mus musculus OX=10090 GN=Bsn PE=1 SV=4
57.38_2195.1862n	1	#18886	4	57.3808	2195.19	0	QPPKSPQVLYSPVSPLSPHR	[C-term] Dehydrated	O88737	BSN_MOUSE Protein bassoon OS=Mus musculus OX=10090 GN=Bsn PE=1 SV=4
57.40_2213.1876n	1	#38396	3	57.4037	2213.19	6.7687	QPPKSPQVLYSPVSPLSPHR		O88737	BSN_MOUSE Protein bassoon OS=Mus musculus OX=10090 GN=Bsn PE=1 SV=4
63.29_2242.1850n	1	#4577	2	63.2864	2242.18	7.694	AAGPPTPGLGPVPGPGPGPGPGSVPR		O88737	BSN_MOUSE Protein bassoon OS=Mus musculus OX=10090 GN=Bsn PE=1 SV=4
62.19_2242.1881n	1	#40923	2	62.1949	2242.19	7.6761	AAGPPTPGLGPVPGPGPGPGPGSVPR		O88737	BSN_MOUSE Protein bassoon OS=Mus musculus OX=10090 GN=Bsn PE=1 SV=4
43.33_2382.1730n	1	#36241	3	43.3278	2382.17	7.237	SPGPPSPMVAQGTQTPHRPSTPR		O88737	BSN_MOUSE Protein bassoon OS=Mus musculus OX=10090 GN=Bsn PE=1 SV=4
43.36_2382.1847n	1	#4827	4	43.3621	2382.18	7.237	SPGPPSPMVAQGTQTPHRPSTPR		O88737	BSN_MOUSE Protein bassoon OS=Mus musculus OX=10090 GN=Bsn PE=1 SV=4
42.87_2382.1894n	1	#20423	4	42.8702	2382.19	7.04	SPGPPSPMVAQGTQTPHRPSTPR		O88737	BSN_MOUSE Protein bassoon OS=Mus musculus OX=10090 GN=Bsn PE=1 SV=4
59.57_2430.1887n	1	#39129	3	59.5732	2430.19	6.002	HRSHGPLLPTIEDSSEEEELR		O88737	BSN_MOUSE Protein bassoon OS=Mus musculus OX=10090 GN=Bsn PE=1 SV=4
47.42_2455.2042n	1	#70949	3	47.4239	2455.2	6.8149	TQGVVGPGPHEEQRPYPQGLPGR		O88737	BSN_MOUSE Protein bassoon OS=Mus musculus OX=10090 GN=Bsn PE=1 SV=4
47.61_2455.2192n	1	#103840	3	47.6127	2455.22	6.759	TQGVVGPGPHEEQRPYPQGLPGR		O88737	BSN_MOUSE Protein bassoon OS=Mus musculus OX=10090 GN=Bsn PE=1 SV=4
47.58_2455.2375n	1	#8965	4	47.5784	2455.24	6.8149	TQGVVGPGPHEEQRPYPQGLPGR		O88737	BSN_MOUSE Protein bassoon OS=Mus musculus OX=10090 GN=Bsn PE=1 SV=4
57.23_2525.3920n	1	#37526	5	57.2335	2525.39	5.86	TVTSAKAEPVPKPPPETTVPPGTPK		O88737	BSN_MOUSE Protein bassoon OS=Mus musculus OX=10090 GN=Bsn PE=1 SV=4
46.93_2580.2761n	1	#43191	3	46.932	2580.28	6.2446	DSTPTASESQRLEPLGPGGVSGRPGK	[10] Deamidation Q	O88737	BSN_MOUSE Protein bassoon OS=Mus musculus OX=10090 GN=Bsn PE=1 SV=4
58.34_2619.3701n	2	#21695,#4526	3,4	58.3374	2619.37	7.7123	VGSSLRPSLEAQAVAPSAEWSKPPR		O88737	BSN_MOUSE Protein bassoon OS=Mus musculus OX=10090 GN=Bsn PE=1 SV=4
44.98_2626.3642n	2	#23132,#2447	3,4	44.9752	2626.36	7.4509	VSPQPPLSTKPSTAEPRPPAGEAQGK		O88737	BSN_MOUSE Protein bassoon OS=Mus musculus OX=10090 GN=Bsn PE=1 SV=4
42.05_2758.4108n	2	#23575,#120624	3,4	42.0466	2758.41	7.4119	GTAPAASQPAGKPQPGPTTAPGPQPAGPPR		O88737	BSN_MOUSE Protein bassoon OS=Mus musculus OX=10090 GN=Bsn PE=1 SV=4
42.54_2758.4115n	2	#3932,#29195	3,4	42.5442	2758.41	7.6424	GTAPAASQPAGKPQPGPTTAPGPQPAGPPR		O88737	BSN_MOUSE Protein bassoon OS=Mus musculus OX=10090 GN=Bsn PE=1 SV=4
76.21_2767.4812n	1	#173709	4	76.208	2767.48	6.8625	LLEGSLGEPAPLPLPTPQQPPAGVPHR		O88737	BSN_MOUSE Protein bassoon OS=Mus musculus OX=10090 GN=Bsn PE=1 SV=4
76.23_2767.4838n	1	#10430	3	76.2314	2767.48	7.5478	LLEGSLGEPAPLPLPTPQQPPAGVPHR		O88737	BSN_MOUSE Protein bassoon OS=Mus musculus OX=10090 GN=Bsn PE=1 SV=4
53.36_2775.1537n	2	#160714,#27324	3,4	53.363	2775.15	6.9586	HSYHDYDEPPEEGLWPHDEGGPGR		O88737	BSN_MOUSE Protein bassoon OS=Mus musculus OX=10090 GN=Bsn PE=1 SV=4
53.66_2775.1600n	1	#111108	4	53.6591	2775.16	6.9504	HSYHDYDEPPEEGLWPHDEGGPGR		O88737	BSN_MOUSE Protein bassoon OS=Mus musculus OX=10090 GN=Bsn PE=1 SV=4
54.58_2833.3242n	1	#51501	3	54.5757	2833.32	7.1292	SSVSQSPAPTYPSDSHYTSLEQNVPR		O88737	BSN_MOUSE Protein bassoon OS=Mus musculus OX=10090 GN=Bsn PE=1 SV=4
39.94_2951.3334n	1	#191856	3	39.9361	2951.33	6.3784	GQPGYPSSADYSQSSRAPSAYHHASESK		O88737	BSN_MOUSE Protein bassoon OS=Mus musculus OX=10090 GN=Bsn PE=1 SV=4
40.03_2951.3469n	1	#22217	4	40.0333	2951.35	6.3784	GQPGYPSSADYSQSSRAPSAYHHASESK		O88737	BSN_MOUSE Protein bassoon OS=Mus musculus OX=10090 GN=Bsn PE=1 SV=4
40.67_3045.5605n	1	#33164	4	40.6682	3045.56	6.9054	SQQQLHSPALSPAHSPAKQPLGKPEQER		O88737	BSN_MOUSE Protein bassoon OS=Mus musculus OX=10090 GN=Bsn PE=1 SV=4
58.67_3077.5126n	3	#30571,#6418,#2463	3,4,5	58.6749	3077.51	5.5914	HGSGSGGPDLVQYQPQHGPGLSAPQGLAPLR		O88737	BSN_MOUSE Protein bassoon OS=Mus musculus OX=10090 GN=Bsn PE=1 SV=4
64.10_3077.5310n	2	#60675,#16567	3,4	64.1006	3077.53	6.8524	HGSGSGGPDLVQYQPQHGPGLSAPQGLAPLR		O88737	BSN_MOUSE Protein bassoon OS=Mus musculus OX=10090 GN=Bsn PE=1 SV=4
64.79_3120.5932n	1	#90313	4	64.7919	3120.59	6.0039	RDILITQMGTAQGVGLKPGPVPEPGAEPHR		O88737	BSN_MOUSE Protein bassoon OS=Mus musculus OX=10090 GN=Bsn PE=1 SV=4
70.73_3123.7167n	1	#133477	5	70.7288	3123.72	5.9756	KPDPLEIGYQAHLPPESLSQLVSRQPPK		O88737	BSN_MOUSE Protein bassoon OS=Mus musculus OX=10090 GN=Bsn PE=1 SV=4
83.95_3179.6920n	1	#31584	3	83.9543	3179.69	6.698	TLPSPPPEEAHLPLAGQVPSQLYAASLLQR		O88737	BSN_MOUSE Protein bassoon OS=Mus musculus OX=10090 GN=Bsn PE=1 SV=4
71.81_3330.6888n	1	#66243	4	71.8051	3330.69	6.1095	ASQPVAESTPAGLGAAVYEEILQTSQSIARMR		O88737	BSN_MOUSE Protein bassoon OS=Mus musculus OX=10090 GN=Bsn PE=1 SV=4
59.50_3337.6580n	1	#183457	3	59.504	3337.66	5.5503	LPHNATTGYEELLSEAGPAEPTDSSGALQGGLR		O88737	BSN_MOUSE Protein bassoon OS=Mus musculus OX=10090 GN=Bsn PE=1 SV=4
60.09_3402.7118n	1	#9094	5	60.0869	3402.71	6.5482	LHSSPVSSTLTSKEVGMTFSQGPGSPATTASPTR		O88737	BSN_MOUSE Protein bassoon OS=Mus musculus OX=10090 GN=Bsn PE=1 SV=4
66.81_3493.7191n	1	#5374	4	66.8077	3493.72	6.2134	LPHNATTGYEELLSEAGPAEPTDSSGALQGGLRR		O88737	BSN_MOUSE Protein bassoon OS=Mus musculus OX=10090 GN=Bsn PE=1 SV=4
59.64_3655.8264n	1	#89765	4	59.6423	3655.83	5.8847	EAPVAPAPGPAPAPPPGQKPAGEAVAGSGSGVLSRPASEK		O88737	BSN_MOUSE Protein bassoon OS=Mus musculus OX=10090 GN=Bsn PE=1 SV=4
52.78_3655.8799n	1	#96352	4	52.7817	3655.88	6.0143	EAPVAPAPGPAPAPPPGQKPAGEAVAGSGSGVLSRPASEK		O88737	BSN_MOUSE Protein bassoon OS=Mus musculus OX=10090 GN=Bsn PE=1 SV=4
72.54_3668.8414n	1	#41105	5	72.5362	3668.84	5.6971	LFGLGASLLTQASTLMSVQPEADTQGQPSPSKGQPK		O88737	BSN_MOUSE Protein bassoon OS=Mus musculus OX=10090 GN=Bsn PE=1 SV=4
49.46_3837.8948n	1	#9898	4	49.4606	3837.89	7.6077	APQAQTTPGPGPAGAKPGARPGGTPGAPASQPGAEGESVFSK		O88737	BSN_MOUSE Protein bassoon OS=Mus musculus OX=10090 GN=Bsn PE=1 SV=4
79.43_3907.1270n	1	#33870	4	79.4283	3907.13	5.9913	FPIASSVPPAEGPVYLGKPAAAKASGAGGPPRPELPAGVAR		O88737	BSN_MOUSE Protein bassoon OS=Mus musculus OX=10090 GN=Bsn PE=1 SV=4
53.97_3936.8132n	1	#71607	4	53.9665	3936.81	6.4123	SPSTSSTIHSYGQPPTTANYGSQTEELPHAPSGPPGSGR		O88737	BSN_MOUSE Protein bassoon OS=Mus musculus OX=10090 GN=Bsn PE=1 SV=4
40.45_4011.0647n	1	#149505	4	40.4451	4011.06	6.8839	GTAPAASQPAGKPQPGPTTAPGPQPAGPPRAEQASSSKPPAAK		O88737	BSN_MOUSE Protein bassoon OS=Mus musculus OX=10090 GN=Bsn PE=1 SV=4
44.95_4149.9032n	1	#26452	4	44.9523	4149.9	6.5014	HDATASSSTTAAATARAMSSVGIQTISDCSVQTEPEQLPR	[18] Oxidation M|[24] Deamidation Q|[29] Carboxymethyl C	O88737	BSN_MOUSE Protein bassoon OS=Mus musculus OX=10090 GN=Bsn PE=1 SV=4
82.59_4280.3065n	1	#14	5	82.591	4280.31	5.5909	VEPGPRPPGTAVVDLRTAVKPTPIILTDQGMDLTSLAVEAR		O88737	BSN_MOUSE Protein bassoon OS=Mus musculus OX=10090 GN=Bsn PE=1 SV=4
50.99_4488.2860n	1	#36841	5	50.9899	4488.29	6.118	QSTAVQPLVINLNAQEQTHTFLATATTVSITMASSVLMAQQK	[38] Oxidation M|[40] Deamidation Q	O88737	BSN_MOUSE Protein bassoon OS=Mus musculus OX=10090 GN=Bsn PE=1 SV=4
51.03_4600.2734n	1	#11550	5	51.0294	4600.27	7.0071	EAPVAPAPGPAPAPPPGQKPAGEAVAGSGSGVLSRPASEKEEASQEDR		O88737	BSN_MOUSE Protein bassoon OS=Mus musculus OX=10090 GN=Bsn PE=1 SV=4
68.45_3402.7127n	1	#102305	5	68.4518	3402.71	5.7778	EAQGVDKQKPGEVRPLQSTPDPSDVGKPAENK	[3] Deamidation Q|[17] Deamidation Q	A0A0A6YY25	BTBDI_MOUSE BTB/POZ domain-containing protein 18 OS=Mus musculus OX=10090 GN=Btbd18 PE=1 SV=1
81.96_3578.7144n	2	#2609,#274	4,5	81.9589	3578.71	6.5367	NTQDSPQILEPSDVEEPSGTLLSSVNEQEIPAR		A0A0A6YY25	BTBDI_MOUSE BTB/POZ domain-containing protein 18 OS=Mus musculus OX=10090 GN=Btbd18 PE=1 SV=1
46.99_1244.6464n	1	#7041	2	46.9949	1244.65	4.8142	EVLKDGGMQLR		O70355	BTNL2_MOUSE Butyrophilin-like protein 2 OS=Mus musculus OX=10090 GN=Btnl2 PE=2 SV=2
46.99_1244.6564n	1	#7494	2	46.9949	1244.66	4.8142	EVLKDGGMQLR		O70355	BTNL2_MOUSE Butyrophilin-like protein 2 OS=Mus musculus OX=10090 GN=Btnl2 PE=2 SV=2
60.02_1607.7152n	1	#15223	3	60.0175	1607.72	5.7957	DGAEVTGLPMEGYGGR		O70355	BTNL2_MOUSE Butyrophilin-like protein 2 OS=Mus musculus OX=10090 GN=Btnl2 PE=2 SV=2
45.60_2185.0343n	2	#213955,#35654	2,3	45.599	2185.03	6.2554	EAGLSQSHDDLSNTTATPSVR		Q80X80	C2C2L_MOUSE Phospholipid transfer protein C2CD2L OS=Mus musculus OX=10090 GN=C2cd2l PE=1 SV=3
89.49_4082.0452n	2	#3843,#306	4,5	89.4882	4082.05	6.8936	FQWPLLLLWAAAAGPGTGQEVQTENVTVAEGGVAEITCR		Q8R464	CADM4_MOUSE Cell adhesion molecule 4 OS=Mus musculus OX=10090 GN=Cadm4 PE=1 SV=1
50.15_922.4744n	1	#178690	1	50.1519	922.474	0	LIQFHFH		P00920	CAH2_MOUSE Carbonic anhydrase 2 OS=Mus musculus OX=10090 GN=Ca2 PE=1 SV=4
48.02_2102.9667n	1	#143835	2	48.0192	2102.97	5.6982	HNGPENWHKDFPIANGDR		P00920	CAH2_MOUSE Carbonic anhydrase 2 OS=Mus musculus OX=10090 GN=Ca2 PE=1 SV=4
47.36_2102.9721n	2	#93694,#8366	2,4	47.3553	2102.97	7.0664	HNGPENWHKDFPIANGDR		P00920	CAH2_MOUSE Carbonic anhydrase 2 OS=Mus musculus OX=10090 GN=Ca2 PE=1 SV=4
47.87_2102.9740n	1	#20977	4	47.8702	2102.97	7.6666	HNGPENWHKDFPIANGDR		P00920	CAH2_MOUSE Carbonic anhydrase 2 OS=Mus musculus OX=10090 GN=Ca2 PE=1 SV=4
64.86_2548.1978n	1	#21160	3	64.8613	2548.2	6.3166	SIVNNGHSFNVEFDDSQDNAVLK		P00920	CAH2_MOUSE Carbonic anhydrase 2 OS=Mus musculus OX=10090 GN=Ca2 PE=1 SV=4
73.43_2873.3295n	1	#8069	3	73.4265	2873.33	6.9484	TLNFNEEGDAEEAMVDNWRPAQPLK		P00920	CAH2_MOUSE Carbonic anhydrase 2 OS=Mus musculus OX=10090 GN=Ca2 PE=1 SV=4
68.89_3143.4751n	2	#33962,#6344	3,4	68.8861	3143.48	6.721	TLNFNEEGDAEEAMVDNWRPAQPLKNR		P00920	CAH2_MOUSE Carbonic anhydrase 2 OS=Mus musculus OX=10090 GN=Ca2 PE=1 SV=4
56.54_3234.6521n	1	#88003	3	56.5415	3234.65	5.5762	QSPVDIDTATAQHDPALQPLLISYDKAASK	[N-term] Acetyl N-TERM	P00920	CAH2_MOUSE Carbonic anhydrase 2 OS=Mus musculus OX=10090 GN=Ca2 PE=1 SV=4
55.61_798.4197n	1	#5669	1	55.6076	798.42	5.4991	FYALSAK		P14211	CALR_MOUSE Calreticulin OS=Mus musculus OX=10090 GN=Calr PE=1 SV=1
95.41_820.4123n	1	#129803	1	95.4055	820.412	5.7667	AAEKQMK	[6] Oxidation M	P14211	CALR_MOUSE Calreticulin OS=Mus musculus OX=10090 GN=Calr PE=1 SV=1
59.18_1218.7074n	1	#84795	2	59.1819	1218.71	5.7166	GQTLVVQFTVK		P14211	CALR_MOUSE Calreticulin OS=Mus musculus OX=10090 GN=Calr PE=1 SV=1
41.55_1542.6759n	1	#141446	2	41.5547	1542.68	5.77	DPDAAKPEDWDER		P14211	CALR_MOUSE Calreticulin OS=Mus musculus OX=10090 GN=Calr PE=1 SV=1
42.08_1783.8341n	3	#198622,#23527,#21227	2,3,4	42.0752	1783.83	7.5076	IKDPDAAKPEDWDER		P14211	CALR_MOUSE Calreticulin OS=Mus musculus OX=10090 GN=Calr PE=1 SV=1
41.59_1783.8388n	1	#6209	4	41.5891	1783.84	7.3597	IKDPDAAKPEDWDER		P14211	CALR_MOUSE Calreticulin OS=Mus musculus OX=10090 GN=Calr PE=1 SV=1
41.15_1783.8397n	2	#14361,#79517	3,4	41.1515	1783.84	7.5193	IKDPDAAKPEDWDER		P14211	CALR_MOUSE Calreticulin OS=Mus musculus OX=10090 GN=Calr PE=1 SV=1
41.52_1783.8417n	1	#4090	3	41.5204	1783.84	7.3597	IKDPDAAKPEDWDER		P14211	CALR_MOUSE Calreticulin OS=Mus musculus OX=10090 GN=Calr PE=1 SV=1
80.37_2580.9333n	1	#28035	3	80.3678	2580.93	5.0973	DEDEDEEDEKEEDEEESPGQAK	[20] Deamidation Q	P14211	CALR_MOUSE Calreticulin OS=Mus musculus OX=10090 GN=Calr PE=1 SV=1
64.70_2720.2954n	2	#17946,#2032	3,4	64.6989	2720.3	6.1658	GQTLVVQFTVKHEQNIDCGGGYVK	[N-term] Acetyl N-TERM|[15] Deamidation N|[18] Carboxymethyl C	P14211	CALR_MOUSE Calreticulin OS=Mus musculus OX=10090 GN=Calr PE=1 SV=1
51.72_2759.2502n	2	#49899,#129704	4,5	51.7152	2759.25	6.4997	IDDPTDSKPEDWDKPEHIPDPDAK		P14211	CALR_MOUSE Calreticulin OS=Mus musculus OX=10090 GN=Calr PE=1 SV=1
52.29_2759.2559n	1	#89759	3	52.293	2759.26	6.5109	IDDPTDSKPEDWDKPEHIPDPDAK		P14211	CALR_MOUSE Calreticulin OS=Mus musculus OX=10090 GN=Calr PE=1 SV=1
52.31_2759.2642n	2	#15951,#32595	4,5	52.3116	2759.26	6.473	IDDPTDSKPEDWDKPEHIPDPDAK		P14211	CALR_MOUSE Calreticulin OS=Mus musculus OX=10090 GN=Calr PE=1 SV=1
52.48_2759.2703n	1	#56028	4	52.4818	2759.27	6.0678	IDDPTDSKPEDWDKPEHIPDPDAK		P14211	CALR_MOUSE Calreticulin OS=Mus musculus OX=10090 GN=Calr PE=1 SV=1
49.88_2958.3878n	1	#123935	4	49.8771	2958.39	7.0903	AKIDDPTDSKPEDWDKPEHIPDPDAK		P14211	CALR_MOUSE Calreticulin OS=Mus musculus OX=10090 GN=Calr PE=1 SV=1
49.86_2958.3933n	1	#58738	5	49.8599	2958.39	7.0903	AKIDDPTDSKPEDWDKPEHIPDPDAK		P14211	CALR_MOUSE Calreticulin OS=Mus musculus OX=10090 GN=Calr PE=1 SV=1
55.38_3682.3423n	1	#85448	5	55.3755	3682.34	5.5534	EDDDDRDEDEDEEDEKEEDEEESPGQAKDEL		P14211	CALR_MOUSE Calreticulin OS=Mus musculus OX=10090 GN=Calr PE=1 SV=1
93.48_3682.4412n	1	#17591	5	93.4844	3682.44	5.2765	EDDDDRDEDEDEEDEKEEDEEESPGQAKDEL		P14211	CALR_MOUSE Calreticulin OS=Mus musculus OX=10090 GN=Calr PE=1 SV=1
69.99_3712.6734n	1	#16207	4	69.9851	3712.67	6.6766	KPEDWDEEMDGEWEPPVIQNPEYKGEWKPR		P14211	CALR_MOUSE Calreticulin OS=Mus musculus OX=10090 GN=Calr PE=1 SV=1
80.57_3724.3898n	2	#111,#58	4,5	80.5722	3724.39	5.4733	EDDDDRDEDEDEEDEKEEDEEESPGQAKDEL	[N-term] Acetyl N-TERM	P14211	CALR_MOUSE Calreticulin OS=Mus musculus OX=10090 GN=Calr PE=1 SV=1
67.34_2239.1318n	2	#8133,#13418	3,4	67.3393	2239.13	6.13	WKPPMIDNPNYQGIWKPR		P35564	CALX_MOUSE Calnexin OS=Mus musculus OX=10090 GN=Canx PE=1 SV=1
42.36_2282.0522n	1	#14274	4	42.3555	2282.05	6.755	EIEDPEDRKPEDWDERPK		P35564	CALX_MOUSE Calnexin OS=Mus musculus OX=10090 GN=Canx PE=1 SV=1
81.88_1539.7925n	1	#33957	2	81.8763	1539.79	4.8435	NLKLENLVYYNR	[1] Deamidation N|[11] Deamidation N	Q3UHL1	CAMKV_MOUSE CaM kinase-like vesicle-associated protein OS=Mus musculus OX=10090 GN=Camkv PE=1 SV=2
81.26_2089.0208n	1	#144777	2	81.263	2089.02	6.1923	YDLGQVIKTEEFCEIFR		Q3UHL1	CAMKV_MOUSE CaM kinase-like vesicle-associated protein OS=Mus musculus OX=10090 GN=Camkv PE=1 SV=2
54.60_2719.3282n	1	#76675	3	54.5987	2719.33	6.2653	AAATPEPAVAQPDSTALEGATGQAPPSSK		Q3UHL1	CAMKV_MOUSE CaM kinase-like vesicle-associated protein OS=Mus musculus OX=10090 GN=Camkv PE=1 SV=2
55.26_2719.3305n	1	#14581	3	55.2598	2719.33	7.4273	AAATPEPAVAQPDSTALEGATGQAPPSSK		Q3UHL1	CAMKV_MOUSE CaM kinase-like vesicle-associated protein OS=Mus musculus OX=10090 GN=Camkv PE=1 SV=2
53.56_4065.8840n	1	#19994	4	53.5632	4065.88	6.8092	AAATPEPAVAQPDSTALEGATGQAPPSSKGEEATGCAQESQR		Q3UHL1	CAMKV_MOUSE CaM kinase-like vesicle-associated protein OS=Mus musculus OX=10090 GN=Camkv PE=1 SV=2
94.00_4130.0183n	1	#2374	4	93.9971	4130.02	5.8503	EYFIFLELATGREVFDWILDQGYYSERDTSNVVR		Q3UHL1	CAMKV_MOUSE CaM kinase-like vesicle-associated protein OS=Mus musculus OX=10090 GN=Camkv PE=1 SV=2
37.15_1233.6459n	1	#199665	3	37.1507	1233.65	5.3696	INSITVDNCKK		P40124	CAP1_MOUSE Adenylyl cyclase-associated protein 1 OS=Mus musculus OX=10090 GN=Cap1 PE=1 SV=4
40.55_1519.7922n	1	#16259	4	40.5481	1519.79	6.0207	HAEMVHTGLKLER		P40124	CAP1_MOUSE Adenylyl cyclase-associated protein 1 OS=Mus musculus OX=10090 GN=Cap1 PE=1 SV=4
37.99_2234.2009n	2	#22312,#65582	4,5	37.9858	2234.2	6.8201	SGPKPFSAPKPQTSPSPKPATK		P40124	CAP1_MOUSE Adenylyl cyclase-associated protein 1 OS=Mus musculus OX=10090 GN=Cap1 PE=1 SV=4
39.04_1534.7042n	1	#24303	2	39.0438	1534.7	7.0792	AQENYEQLQEQR		Q3UHB8	CC177_MOUSE Coiled-coil domain-containing protein 177 OS=Mus musculus OX=10090 GN=Ccdc177 PE=1 SV=1
41.30_1804.9497n	1	#34640	3	41.2973	1804.95	6.7984	RLQHAAQVAEEAVQQK		Q3UHB8	CC177_MOUSE Coiled-coil domain-containing protein 177 OS=Mus musculus OX=10090 GN=Ccdc177 PE=1 SV=1
41.14_1804.9547n	1	#200958	2	41.1429	1804.95	6.7984	RLQHAAQVAEEAVQQK		Q3UHB8	CC177_MOUSE Coiled-coil domain-containing protein 177 OS=Mus musculus OX=10090 GN=Ccdc177 PE=1 SV=1
54.01_2095.0128n	1	#74322	4	54.0131	2095.01	6.0105	SFSLGDLSHSPQTAQHVER		Q3UHB8	CC177_MOUSE Coiled-coil domain-containing protein 177 OS=Mus musculus OX=10090 GN=Ccdc177 PE=1 SV=1
54.04_2095.0133n	1	#32118	3	54.0364	2095.01	6.0105	SFSLGDLSHSPQTAQHVER		Q3UHB8	CC177_MOUSE Coiled-coil domain-containing protein 177 OS=Mus musculus OX=10090 GN=Ccdc177 PE=1 SV=1
45.94_2431.1504n	1	#178941	3	45.9425	2431.15	5.2973	DGALSSESGASSSSYSGESLRELR		Q3UHB8	CC177_MOUSE Coiled-coil domain-containing protein 177 OS=Mus musculus OX=10090 GN=Ccdc177 PE=1 SV=1
46.79_2587.2213n	1	#48530	5	46.7947	2587.22	5.7944	RDGALSSESGASSSSYSGESLRELR		Q3UHB8	CC177_MOUSE Coiled-coil domain-containing protein 177 OS=Mus musculus OX=10090 GN=Ccdc177 PE=1 SV=1
66.81_3186.6873n	1	#64734	3	66.8077	3186.69	6.2637	EAASGVTVTVTGPPAAPAPAPAPPAPAAPAPGTLSK		Q8VHW2	CCG8_MOUSE Voltage-dependent calcium channel gamma-8 subunit OS=Mus musculus OX=10090 GN=Cacng8 PE=1 SV=1
70.66_3420.9447n	1	#189654	4	70.6588	3420.94	4.9058	NIILGAGILFVAAGLSNIIGVIVYISANAGEPGPK		Q8VHW2	CCG8_MOUSE Voltage-dependent calcium channel gamma-8 subunit OS=Mus musculus OX=10090 GN=Cacng8 PE=1 SV=1
43.34_1717.9017n	1	#219470	4	43.3449	1717.9	5.9098	KSLFINHHPPGQTSR		Q8BGU5	CCNY_MOUSE Cyclin-Y OS=Mus musculus OX=10090 GN=Ccny PE=1 SV=1
54.77_1170.5973n	1	#11783	2	54.7721	1170.6	6.7883	IGEGTYGTVFK		P49615	CDK5_MOUSE Cyclin-dependent-like kinase 5 OS=Mus musculus OX=10090 GN=Cdk5 PE=1 SV=1
44.45_1742.8596n	1	#14690	2	44.4547	1742.86	5.7966	VRLDDDDEGVPSSALR		P49615	CDK5_MOUSE Cyclin-dependent-like kinase 5 OS=Mus musculus OX=10090 GN=Cdk5 PE=1 SV=1
82.50_2050.0106n	1	#136100	2	82.4967	2050.01	5.9992	GMLSTHLTSMFEYLAPPR		Q99J95	CDK9_MOUSE Cyclin-dependent kinase 9 OS=Mus musculus OX=10090 GN=Cdk9 PE=1 SV=1
71.78_3632.8243n	2	#8392,#2073	4,5	71.7808	3632.82	6.7185	SPIMQGNTEQHQLALISQLCGSITPEVWPNVDK		Q99J95	CDK9_MOUSE Cyclin-dependent kinase 9 OS=Mus musculus OX=10090 GN=Cdk9 PE=1 SV=1
49.33_1921.9104n	2	#77211,#10196	2,3	49.3317	1921.91	7.832	AITKDENEWKEFEQR		Q4VAA2	CDV3_MOUSE Protein CDV3 OS=Mus musculus OX=10090 GN=Cdv3 PE=1 SV=2
49.36_1921.9147n	1	#44119	4	49.3575	1921.91	7.332	AITKDENEWKEFEQR		Q4VAA2	CDV3_MOUSE Protein CDV3 OS=Mus musculus OX=10090 GN=Cdv3 PE=1 SV=2
34.61_2444.1359n	1	#98285	3	34.6113	2444.14	6.1907	AANAASGAGGSSAAAGSRPGDGGSLGSGAR		Q4VAA2	CDV3_MOUSE Protein CDV3 OS=Mus musculus OX=10090 GN=Cdv3 PE=1 SV=2
42.37_2444.1518n	1	#156763	3	42.3726	2444.15	6.1304	AANAASGAGGSSAAAGSRPGDGGSLGSGAR		Q4VAA2	CDV3_MOUSE Protein CDV3 OS=Mus musculus OX=10090 GN=Cdv3 PE=1 SV=2
63.24_2519.2482n	1	#11042	3	63.2409	2519.25	6.9774	KTPQGPPEIYSDTQFPSLQSTAK		Q4VAA2	CDV3_MOUSE Protein CDV3 OS=Mus musculus OX=10090 GN=Cdv3 PE=1 SV=2
67.29_3240.6623n	1	#9091	3	67.2938	3240.66	7.0765	TAPVQAPPAPVTVTETPEPAMPSGVYRPPGAR		Q4VAA2	CDV3_MOUSE Protein CDV3 OS=Mus musculus OX=10090 GN=Cdv3 PE=1 SV=2
56.54_3234.6521n	1	#88003	3	56.5415	3234.65	6.146	ADPVLLNNHSNLKPAPTVPAAPSSPDATSEPK		Q9JKC6	CEND_MOUSE Cell cycle exit and neuronal differentiation protein 1 OS=Mus musculus OX=10090 GN=Cend1 PE=1 SV=1
60.60_1653.7317n	1	#44413	2	60.5953	1653.73	6.238	SVVTEEFNGSDWER		Q9CXS4	CENPV_MOUSE Centromere protein V OS=Mus musculus OX=10090 GN=Cenpv PE=1 SV=2
49.15_843.4520n	1	#103830	2	49.1507	843.452	8.3496	GGIMLPEK		Q64433	CH10_MOUSE 10 kDa heat shock protein_ mitochondrial OS=Mus musculus OX=10090 GN=Hspe1 PE=1 SV=2
49.41_843.4521n	1	#30992	2	49.4091	843.452	7.61	GGIMLPEK		Q64433	CH10_MOUSE 10 kDa heat shock protein_ mitochondrial OS=Mus musculus OX=10090 GN=Hspe1 PE=1 SV=2
65.38_1034.5885n	1	#27388	2	65.3814	1034.59	6.5519	KFLPLFDR		Q64433	CH10_MOUSE 10 kDa heat shock protein_ mitochondrial OS=Mus musculus OX=10090 GN=Hspe1 PE=1 SV=2
51.50_1284.7196n	1	#94828	2	51.503	1284.72	7.5915	VLQATVVAVGSGGK		Q64433	CH10_MOUSE 10 kDa heat shock protein_ mitochondrial OS=Mus musculus OX=10090 GN=Hspe1 PE=1 SV=2
51.99_1284.7333n	1	#35871	2	51.989	1284.73	7.3548	VLQATVVAVGSGGK		Q64433	CH10_MOUSE 10 kDa heat shock protein_ mitochondrial OS=Mus musculus OX=10090 GN=Hspe1 PE=1 SV=2
45.48_1469.8429n	1	#165440	2	45.4789	1469.84	7.6184	VLQATVVAVGSGGKGK		Q64433	CH10_MOUSE 10 kDa heat shock protein_ mitochondrial OS=Mus musculus OX=10090 GN=Hspe1 PE=1 SV=2
45.51_1469.8510n	1	#42258	3	45.5132	1469.85	7.6184	VLQATVVAVGSGGKGK		Q64433	CH10_MOUSE 10 kDa heat shock protein_ mitochondrial OS=Mus musculus OX=10090 GN=Hspe1 PE=1 SV=2
45.91_1469.8536n	2	#36395,#10529	2,3	45.9081	1469.85	7.4659	VLQATVVAVGSGGKGK		Q64433	CH10_MOUSE 10 kDa heat shock protein_ mitochondrial OS=Mus musculus OX=10090 GN=Hspe1 PE=1 SV=2
56.89_1630.8305n	1	#40090	2	56.8896	1630.83	6.3256	SAAETVTKGGIMLPEK		Q64433	CH10_MOUSE 10 kDa heat shock protein_ mitochondrial OS=Mus musculus OX=10090 GN=Hspe1 PE=1 SV=2
51.45_1630.8725n	1	#147149	3	51.4507	1630.87	6.2029	SAAETVTKGGIMLPEK		Q64433	CH10_MOUSE 10 kDa heat shock protein_ mitochondrial OS=Mus musculus OX=10090 GN=Hspe1 PE=1 SV=2
55.21_804.4060n	1	#71869	1	55.2138	804.406	6.9313	DDAMLLK		P63038	CH60_MOUSE 60 kDa heat shock protein_ mitochondrial OS=Mus musculus OX=10090 GN=Hspd1 PE=1 SV=1
53.71_843.4805n	1	#20720	1	53.7064	843.481	6.5729	IPAMTIAK		P63038	CH60_MOUSE 60 kDa heat shock protein_ mitochondrial OS=Mus musculus OX=10090 GN=Hspd1 PE=1 SV=1
49.91_900.5191n	1	#2741	2	49.9115	900.519	8.0362	LSDGVAVLK		P63038	CH60_MOUSE 60 kDa heat shock protein_ mitochondrial OS=Mus musculus OX=10090 GN=Hspd1 PE=1 SV=1
49.88_900.5208n	1	#2596	2	49.8771	900.521	7.7538	LSDGVAVLK		P63038	CH60_MOUSE 60 kDa heat shock protein_ mitochondrial OS=Mus musculus OX=10090 GN=Hspd1 PE=1 SV=1
54.71_1212.7374n	2	#59811,#105864	2,3	54.7136	1212.74	6.5962	LAKLSDGVAVLK		P63038	CH60_MOUSE 60 kDa heat shock protein_ mitochondrial OS=Mus musculus OX=10090 GN=Hspd1 PE=1 SV=1
54.44_1212.7456n	1	#148869	3	54.4368	1212.75	6.3976	LAKLSDGVAVLK		P63038	CH60_MOUSE 60 kDa heat shock protein_ mitochondrial OS=Mus musculus OX=10090 GN=Hspd1 PE=1 SV=1
32.20_1232.5872n	1	#162157	2	32.2037	1232.59	7.0265	VGGTSDVEVNEK		P63038	CH60_MOUSE 60 kDa heat shock protein_ mitochondrial OS=Mus musculus OX=10090 GN=Hspd1 PE=1 SV=1
35.15_1232.5886n	1	#58996	2	35.1546	1232.59	6.2774	VGGTSDVEVNEK		P63038	CH60_MOUSE 60 kDa heat shock protein_ mitochondrial OS=Mus musculus OX=10090 GN=Hspd1 PE=1 SV=1
33.81_1232.5942n	1	#75666	2	33.8107	1232.59	7.433	VGGTSDVEVNEK		P63038	CH60_MOUSE 60 kDa heat shock protein_ mitochondrial OS=Mus musculus OX=10090 GN=Hspd1 PE=1 SV=1
57.76_1343.7078n	1	#1420	2	57.7632	1343.71	7.7847	TVIIEQSWGSPK		P63038	CH60_MOUSE 60 kDa heat shock protein_ mitochondrial OS=Mus musculus OX=10090 GN=Hspd1 PE=1 SV=1
57.56_1725.9408n	1	#72376	3	57.5642	1725.94	6.1163	VGLQVVAVKAPGFGDNR		P63038	CH60_MOUSE 60 kDa heat shock protein_ mitochondrial OS=Mus musculus OX=10090 GN=Hspd1 PE=1 SV=1
82.95_2032.1271n	1	#8020	3	82.949	2032.13	5.7699	KISSVQSIVPALEIANAHR		P63038	CH60_MOUSE 60 kDa heat shock protein_ mitochondrial OS=Mus musculus OX=10090 GN=Hspd1 PE=1 SV=1
75.71_2365.3108n	2	#2536,#14160	3,4	75.7145	2365.31	5.7064	KPLVIIAEDVDGEALSTLVLNR	[21] Deamidation N	P63038	CH60_MOUSE 60 kDa heat shock protein_ mitochondrial OS=Mus musculus OX=10090 GN=Hspd1 PE=1 SV=1
55.51_2559.2368n	1	#7772	3	55.5145	2559.24	7.5994	LVQDVANNTNEEAGDGTTTATVLAR		P63038	CH60_MOUSE 60 kDa heat shock protein_ mitochondrial OS=Mus musculus OX=10090 GN=Hspd1 PE=1 SV=1
54.96_2559.2396n	1	#33629	3	54.9583	2559.24	7.0804	LVQDVANNTNEEAGDGTTTATVLAR		P63038	CH60_MOUSE 60 kDa heat shock protein_ mitochondrial OS=Mus musculus OX=10090 GN=Hspd1 PE=1 SV=1
55.35_3540.7405n	1	#47699	5	55.3522	3540.74	5.3864	QSKPVTTPEEIAQVATISANGDKDIGNIISDAMK		P63038	CH60_MOUSE 60 kDa heat shock protein_ mitochondrial OS=Mus musculus OX=10090 GN=Hspd1 PE=1 SV=1
72.81_1558.7940n	1	#23280	2	72.8081	1558.79	6.1514	GFGFVTFENIDDAK		P60824	CIRBP_MOUSE Cold-inducible RNA-binding protein OS=Mus musculus OX=10090 GN=Cirbp PE=1 SV=1
38.28_1820.7259n	1	#24650	2	38.2774	1820.73	0	GGSYRDSYDSYATHNE		P60824	CIRBP_MOUSE Cold-inducible RNA-binding protein OS=Mus musculus OX=10090 GN=Cirbp PE=1 SV=1
38.23_1994.7859n	1	#60985	3	38.2259	1994.79	7.0719	SSGGSYRDSYDSYATHNE		P60824	CIRBP_MOUSE Cold-inducible RNA-binding protein OS=Mus musculus OX=10090 GN=Cirbp PE=1 SV=1
38.67_1994.7885n	2	#70324,#22444	2,3	38.672	1994.79	8.0127	SSGGSYRDSYDSYATHNE		P60824	CIRBP_MOUSE Cold-inducible RNA-binding protein OS=Mus musculus OX=10090 GN=Cirbp PE=1 SV=1
46.18_910.3986n	2	#264,#202	1,2	46.177	910.399	5.886	AYAEGMNR		Q9CZU6	CISY_MOUSE Citrate synthase_ mitochondrial OS=Mus musculus OX=10090 GN=Cs PE=1 SV=1
44.11_968.4336n	2	#86919,#22870	1,2	44.1116	968.434	7.5532	SMSTDGLMK		Q9CZU6	CISY_MOUSE Citrate synthase_ mitochondrial OS=Mus musculus OX=10090 GN=Cs PE=1 SV=1
43.64_968.4339n	2	#138753,#32227	1,2	43.6369	968.434	7.6243	SMSTDGLMK		Q9CZU6	CISY_MOUSE Citrate synthase_ mitochondrial OS=Mus musculus OX=10090 GN=Cs PE=1 SV=1
44.98_1023.4697n	1	#153762	1	44.9809	1023.47	5.6488	GYSIPECQK		Q9CZU6	CISY_MOUSE Citrate synthase_ mitochondrial OS=Mus musculus OX=10090 GN=Cs PE=1 SV=1
45.07_1166.6374n	1	#24788	2	45.0667	1166.64	5.5993	VVPGYGHAVLR		Q9CZU6	CISY_MOUSE Citrate synthase_ mitochondrial OS=Mus musculus OX=10090 GN=Cs PE=1 SV=1
85.22_1761.8891n	1	#40347	3	85.2224	1761.89	5.85	GLVYETSVLDPDEGIR		Q9CZU6	CISY_MOUSE Citrate synthase_ mitochondrial OS=Mus musculus OX=10090 GN=Cs PE=1 SV=1
73.04_2065.0423n	1	#17871	3	73.0404	2065.04	6.2685	GLVYETSVLDPDEGIRFR		Q9CZU6	CISY_MOUSE Citrate synthase_ mitochondrial OS=Mus musculus OX=10090 GN=Cs PE=1 SV=1
55.54_1045.6298n	1	#10871	2	55.5379	1045.63	6.0124	LRSVLMSLK		Q6IRU5	CLCB_MOUSE Clathrin light chain B OS=Mus musculus OX=10090 GN=Cltb PE=1 SV=1
47.36_1088.4933n	1	#23379	1	47.3553	1088.49	7.3367	DLEEWNQR		Q6IRU5	CLCB_MOUSE Clathrin light chain B OS=Mus musculus OX=10090 GN=Cltb PE=1 SV=1
47.53_1088.4975n	1	#11588	2	47.5269	1088.5	7.3367	DLEEWNQR		Q6IRU5	CLCB_MOUSE Clathrin light chain B OS=Mus musculus OX=10090 GN=Cltb PE=1 SV=1
44.39_1175.5749n	1	#84280	2	44.3861	1175.57	5.8133	VAQLCDFNPK	[N-term] Acetyl N-TERM	Q6IRU5	CLCB_MOUSE Clathrin light chain B OS=Mus musculus OX=10090 GN=Cltb PE=1 SV=1
41.43_1204.5302n	1	#4678	2	41.4346	1204.53	6.8028	EETPGTEWEK		Q6IRU5	CLCB_MOUSE Clathrin light chain B OS=Mus musculus OX=10090 GN=Cltb PE=1 SV=1
59.53_1458.8288n	1	#5024	2	59.5268	1458.83	6.7386	SVLMSLKQTPLSR		Q6IRU5	CLCB_MOUSE Clathrin light chain B OS=Mus musculus OX=10090 GN=Cltb PE=1 SV=1
58.39_1901.9513n	2	#13534,#2934	2,3	58.3937	1901.95	7.3181	LQELDAASKVTEQEWR		Q6IRU5	CLCB_MOUSE Clathrin light chain B OS=Mus musculus OX=10090 GN=Cltb PE=1 SV=1
45.75_1916.8919n	1	#118921	2	45.7535	1916.89	6.6828	DLEEWNQRQSEQVEK		Q6IRU5	CLCB_MOUSE Clathrin light chain B OS=Mus musculus OX=10090 GN=Cltb PE=1 SV=1
68.91_581.3287n	1	#196028	1	68.9103	581.329	0	LFFR		P16330	CN37_MOUSE 2'_3'-cyclic-nucleotide 3'-phosphodiesterase OS=Mus musculus OX=10090 GN=Cnp PE=1 SV=3
43.99_731.2906n	1	#23556	1	43.9915	731.291	6.6535	FCDYGK		P16330	CN37_MOUSE 2'_3'-cyclic-nucleotide 3'-phosphodiesterase OS=Mus musculus OX=10090 GN=Cnp PE=1 SV=3
41.45_731.2910n	2	#9120,#21652	1,2	41.4518	731.291	5.4164	FCDYGK		P16330	CN37_MOUSE 2'_3'-cyclic-nucleotide 3'-phosphodiesterase OS=Mus musculus OX=10090 GN=Cnp PE=1 SV=3
41.45_731.2918n	1	#7978	1	41.4518	731.292	5.4164	FCDYGK		P16330	CN37_MOUSE 2'_3'-cyclic-nucleotide 3'-phosphodiesterase OS=Mus musculus OX=10090 GN=Cnp PE=1 SV=3
44.04_731.2924n	1	#14916	1	44.0429	731.292	6.6535	FCDYGK		P16330	CN37_MOUSE 2'_3'-cyclic-nucleotide 3'-phosphodiesterase OS=Mus musculus OX=10090 GN=Cnp PE=1 SV=3
68.86_806.4796n	1	#45119	2	68.8626	806.48	0	PKLFFR		P16330	CN37_MOUSE 2'_3'-cyclic-nucleotide 3'-phosphodiesterase OS=Mus musculus OX=10090 GN=Cnp PE=1 SV=3
69.70_806.4821n	1	#208713	2	69.7026	806.482	0	PKLFFR		P16330	CN37_MOUSE 2'_3'-cyclic-nucleotide 3'-phosphodiesterase OS=Mus musculus OX=10090 GN=Cnp PE=1 SV=3
36.69_892.5223n	1	#74397	2	36.6931	892.522	6.5746	LYSLGKGR		P16330	CN37_MOUSE 2'_3'-cyclic-nucleotide 3'-phosphodiesterase OS=Mus musculus OX=10090 GN=Cnp PE=1 SV=3
52.76_897.4035n	1	#3803	1	52.7582	897.404	7.2579	MNTSFTR	[N-term] Acetyl N-TERM	P16330	CN37_MOUSE 2'_3'-cyclic-nucleotide 3'-phosphodiesterase OS=Mus musculus OX=10090 GN=Cnp PE=1 SV=3
52.16_897.4036n	1	#22280	1	52.1637	897.404	6.7079	MNTSFTR	[N-term] Acetyl N-TERM	P16330	CN37_MOUSE 2'_3'-cyclic-nucleotide 3'-phosphodiesterase OS=Mus musculus OX=10090 GN=Cnp PE=1 SV=3
39.76_929.4164n	1	#57217	1	39.7645	929.416	7.9598	ADFSEAYK		P16330	CN37_MOUSE 2'_3'-cyclic-nucleotide 3'-phosphodiesterase OS=Mus musculus OX=10090 GN=Cnp PE=1 SV=3
40.12_929.4197n	2	#19028,#7422	1,2	40.1191	929.42	8.1689	ADFSEAYK		P16330	CN37_MOUSE 2'_3'-cyclic-nucleotide 3'-phosphodiesterase OS=Mus musculus OX=10090 GN=Cnp PE=1 SV=3
39.75_929.4215n	1	#20772	2	39.7473	929.422	7.9598	ADFSEAYK		P16330	CN37_MOUSE 2'_3'-cyclic-nucleotide 3'-phosphodiesterase OS=Mus musculus OX=10090 GN=Cnp PE=1 SV=3
40.05_929.4485n	1	#41409	2	40.0505	929.449	7.9598	ADFSEAYK		P16330	CN37_MOUSE 2'_3'-cyclic-nucleotide 3'-phosphodiesterase OS=Mus musculus OX=10090 GN=Cnp PE=1 SV=3
43.99_1025.4995n	1	#7027	2	43.9915	1025.5	7.3116	MNTSFTRK	[N-term] Acetyl N-TERM	P16330	CN37_MOUSE 2'_3'-cyclic-nucleotide 3'-phosphodiesterase OS=Mus musculus OX=10090 GN=Cnp PE=1 SV=3
43.59_1025.5049n	1	#14837	2	43.5854	1025.5	7.177	MNTSFTRK	[N-term] Acetyl N-TERM	P16330	CN37_MOUSE 2'_3'-cyclic-nucleotide 3'-phosphodiesterase OS=Mus musculus OX=10090 GN=Cnp PE=1 SV=3
46.05_1026.4838n	2	#195220,#3478	1,2	46.0483	1026.48	7.2326	MNTSFTRK	[N-term] Acetyl N-TERM|[2] Deamidation N	P16330	CN37_MOUSE 2'_3'-cyclic-nucleotide 3'-phosphodiesterase OS=Mus musculus OX=10090 GN=Cnp PE=1 SV=3
46.52_1026.4861n	1	#18321	2	46.5201	1026.49	7.2896	MNTSFTRK	[N-term] Acetyl N-TERM|[2] Deamidation N	P16330	CN37_MOUSE 2'_3'-cyclic-nucleotide 3'-phosphodiesterase OS=Mus musculus OX=10090 GN=Cnp PE=1 SV=3
45.62_1026.4898n	1	#10076	2	45.6161	1026.49	7.1508	MNTSFTRK	[N-term] Acetyl N-TERM|[2] Deamidation N	P16330	CN37_MOUSE 2'_3'-cyclic-nucleotide 3'-phosphodiesterase OS=Mus musculus OX=10090 GN=Cnp PE=1 SV=3
54.77_1153.5101n	1	#57929	2	54.7721	1153.51	7.1433	LDEDLAGYCR		P16330	CN37_MOUSE 2'_3'-cyclic-nucleotide 3'-phosphodiesterase OS=Mus musculus OX=10090 GN=Cnp PE=1 SV=3
44.13_1309.6507n	1	#109502	3	44.1287	1309.65	6.7632	VLVLDDTNHER		P16330	CN37_MOUSE 2'_3'-cyclic-nucleotide 3'-phosphodiesterase OS=Mus musculus OX=10090 GN=Cnp PE=1 SV=3
40.02_1315.7126n	1	#51268	3	40.0162	1315.71	7.0387	LILEKYHDGTK		P16330	CN37_MOUSE 2'_3'-cyclic-nucleotide 3'-phosphodiesterase OS=Mus musculus OX=10090 GN=Cnp PE=1 SV=3
59.53_1316.6443n	1	#5362	2	59.5268	1316.64	6.854	NQWQLSADDLK		P16330	CN37_MOUSE 2'_3'-cyclic-nucleotide 3'-phosphodiesterase OS=Mus musculus OX=10090 GN=Cnp PE=1 SV=3
68.84_1391.7701n	1	#7023	3	68.8391	1391.77	7.5067	SHTFLPKLFFR		P16330	CN37_MOUSE 2'_3'-cyclic-nucleotide 3'-phosphodiesterase OS=Mus musculus OX=10090 GN=Cnp PE=1 SV=3
69.66_1391.7703n	1	#53868	3	69.6551	1391.77	7.3991	SHTFLPKLFFR		P16330	CN37_MOUSE 2'_3'-cyclic-nucleotide 3'-phosphodiesterase OS=Mus musculus OX=10090 GN=Cnp PE=1 SV=3
49.86_1440.7418n	1	#79803	2	49.8599	1440.74	5.9965	AGQVFLEELGNHK		P16330	CN37_MOUSE 2'_3'-cyclic-nucleotide 3'-phosphodiesterase OS=Mus musculus OX=10090 GN=Cnp PE=1 SV=3
52.31_1444.7361n	1	#3626	3	52.3116	1444.74	8.2525	NQWQLSADDLKK		P16330	CN37_MOUSE 2'_3'-cyclic-nucleotide 3'-phosphodiesterase OS=Mus musculus OX=10090 GN=Cnp PE=1 SV=3
52.11_1444.7777n	1	#215763	3	52.1082	1444.78	8.1176	NQWQLSADDLKK		P16330	CN37_MOUSE 2'_3'-cyclic-nucleotide 3'-phosphodiesterase OS=Mus musculus OX=10090 GN=Cnp PE=1 SV=3
44.71_1491.7216n	1	#6936	2	44.7121	1491.72	8.428	AAGAEEYAQQEVVK		P16330	CN37_MOUSE 2'_3'-cyclic-nucleotide 3'-phosphodiesterase OS=Mus musculus OX=10090 GN=Cnp PE=1 SV=3
42.30_1647.8202n	1	#8450	3	42.304	1647.82	8.2614	AAGAEEYAQQEVVKR		P16330	CN37_MOUSE 2'_3'-cyclic-nucleotide 3'-phosphodiesterase OS=Mus musculus OX=10090 GN=Cnp PE=1 SV=3
41.34_1647.8229n	2	#74271,#8155	2,3	41.3402	1647.82	8.2958	AAGAEEYAQQEVVKR		P16330	CN37_MOUSE 2'_3'-cyclic-nucleotide 3'-phosphodiesterase OS=Mus musculus OX=10090 GN=Cnp PE=1 SV=3
41.81_1647.8235n	2	#8134,#968	2,3	41.8121	1647.82	8.5133	AAGAEEYAQQEVVKR		P16330	CN37_MOUSE 2'_3'-cyclic-nucleotide 3'-phosphodiesterase OS=Mus musculus OX=10090 GN=Cnp PE=1 SV=3
68.65_1339.7705n	1	#2736	2	68.6541	1339.77	6.6182	LGGSAVISLEGKPL		P18760	COF1_MOUSE Cofilin-1 OS=Mus musculus OX=10090 GN=Cfl1 PE=1 SV=3
67.97_1339.7723n	1	#7640	2	67.9684	1339.77	6.4446	LGGSAVISLEGKPL		P18760	COF1_MOUSE Cofilin-1 OS=Mus musculus OX=10090 GN=Cfl1 PE=1 SV=3
46.01_733.3431n	1	#198675	1	46.0054	733.343	5.4353	GTNEWK		P19783	COX41_MOUSE Cytochrome c oxidase subunit 4 isoform 1_ mitochondrial OS=Mus musculus OX=10090 GN=Cox4i1 PE=1 SV=2
48.45_1031.5413n	1	#18698	2	48.4482	1031.54	7.6455	ANPIQGFSAK		P19783	COX41_MOUSE Cytochrome c oxidase subunit 4 isoform 1_ mitochondrial OS=Mus musculus OX=10090 GN=Cox4i1 PE=1 SV=2
72.89_1970.9751n	2	#13601,#14118	2,3	72.8878	1970.98	7.869	DYPLPDVAHVTMLSASQK		P19783	COX41_MOUSE Cytochrome c oxidase subunit 4 isoform 1_ mitochondrial OS=Mus musculus OX=10090 GN=Cox4i1 PE=1 SV=2
58.39_2128.0655n	1	#16604	2	58.3937	2128.07	6.5043	RDYPLPDVAHVTMLSASQK	[18] Deamidation Q	P19783	COX41_MOUSE Cytochrome c oxidase subunit 4 isoform 1_ mitochondrial OS=Mus musculus OX=10090 GN=Cox4i1 PE=1 SV=2
60.06_2199.9949n	1	#48620	4	60.0635	2199.99	6.2389	IQFNESFAEMNRGTNEWK		P19783	COX41_MOUSE Cytochrome c oxidase subunit 4 isoform 1_ mitochondrial OS=Mus musculus OX=10090 GN=Cox4i1 PE=1 SV=2
48.57_991.5184n	1	#63451	2	48.5683	991.518	7.0065	LNDFASAVR		P12787	COX5A_MOUSE Cytochrome c oxidase subunit 5A_ mitochondrial OS=Mus musculus OX=10090 GN=Cox5a PE=1 SV=2
73.76_1631.8214n	1	#12597	2	73.764	1631.82	7.5572	GMNTLVGYDLVPEPK		P12787	COX5A_MOUSE Cytochrome c oxidase subunit 5A_ mitochondrial OS=Mus musculus OX=10090 GN=Cox5a PE=1 SV=2
72.31_2180.0822n	3	#26830,#1662,#1260	2,3,4	72.3126	2180.08	6.4808	WVTYFNKPDIDAWELRK		P12787	COX5A_MOUSE Cytochrome c oxidase subunit 5A_ mitochondrial OS=Mus musculus OX=10090 GN=Cox5a PE=1 SV=2
77.52_825.3773n	1	#2787	1	77.5222	825.377	6.6501	MEFVMK	[N-term] Acetyl N-TERM	P63040	CPLX1_MOUSE Complexin-1 OS=Mus musculus OX=10090 GN=Cplx1 PE=1 SV=1
40.74_1308.5853n	1	#24330	2	40.7368	1308.59	6.2009	DMGKMLGGDEEK		P63040	CPLX1_MOUSE Complexin-1 OS=Mus musculus OX=10090 GN=Cplx1 PE=1 SV=1
40.72_1308.6023n	1	#50079	2	40.7197	1308.6	6.2009	DMGKMLGGDEEK		P63040	CPLX1_MOUSE Complexin-1 OS=Mus musculus OX=10090 GN=Cplx1 PE=1 SV=1
62.04_1435.7536n	1	#36816	2	62.0372	1435.75	7.9158	YLPGPLQDMFKK		P63040	CPLX1_MOUSE Complexin-1 OS=Mus musculus OX=10090 GN=Cplx1 PE=1 SV=1
83.86_1551.7783n	1	#2788	2	83.8601	1551.78	7.0503	MEFVMKQALGGATK	[N-term] Acetyl N-TERM	P63040	CPLX1_MOUSE Complexin-1 OS=Mus musculus OX=10090 GN=Cplx1 PE=1 SV=1
44.78_2088.9754n	1	#135324	2	44.7807	2088.98	6.83	EAEAQAAMEANSEGSLTRPK		P63040	CPLX1_MOUSE Complexin-1 OS=Mus musculus OX=10090 GN=Cplx1 PE=1 SV=1
40.99_2217.0667n	1	#81940	3	40.9885	2217.07	6.9737	EAEAQAAMEANSEGSLTRPKK		P63040	CPLX1_MOUSE Complexin-1 OS=Mus musculus OX=10090 GN=Cplx1 PE=1 SV=1
61.99_795.3941n	1	#26462	1	61.9924	795.394	0	QDMFKK		P84086	CPLX2_MOUSE Complexin-2 OS=Mus musculus OX=10090 GN=Cplx2 PE=1 SV=1
62.08_795.3959n	1	#150950	1	62.0821	795.396	0	QDMFKK		P84086	CPLX2_MOUSE Complexin-2 OS=Mus musculus OX=10090 GN=Cplx2 PE=1 SV=1
61.98_1159.6044n	2	#40527,#77546	2,3	61.9815	1159.6	0	PGPLQDMFKK		P84086	CPLX2_MOUSE Complexin-2 OS=Mus musculus OX=10090 GN=Cplx2 PE=1 SV=1
62.01_1159.6057n	1	#15726	2	62.0148	1159.61	0	PGPLQDMFKK		P84086	CPLX2_MOUSE Complexin-2 OS=Mus musculus OX=10090 GN=Cplx2 PE=1 SV=1
62.06_1159.6095n	1	#74259	2	62.0596	1159.61	0	PGPLQDMFKK		P84086	CPLX2_MOUSE Complexin-2 OS=Mus musculus OX=10090 GN=Cplx2 PE=1 SV=1
62.04_1435.7536n	1	#36816	2	62.0372	1435.75	7.9158	YLPGPLQDMFKK		P84086	CPLX2_MOUSE Complexin-2 OS=Mus musculus OX=10090 GN=Cplx2 PE=1 SV=1
81.31_1537.7639n	1	#403	2	81.3113	1537.76	7.8211	MDFVMKQALGGATK	[N-term] Acetyl N-TERM	P84086	CPLX2_MOUSE Complexin-2 OS=Mus musculus OX=10090 GN=Cplx2 PE=1 SV=1
80.71_1537.7695n	1	#6852	2	80.7091	1537.77	7.6604	MDFVMKQALGGATK	[N-term] Acetyl N-TERM	P84086	CPLX2_MOUSE Complexin-2 OS=Mus musculus OX=10090 GN=Cplx2 PE=1 SV=1
45.07_1598.8063n	1	#7344	2	45.0667	1598.81	8.7379	AALEQPCEGSLTRPK		P84086	CPLX2_MOUSE Complexin-2 OS=Mus musculus OX=10090 GN=Cplx2 PE=1 SV=1
44.61_1598.8108n	1	#26569	2	44.6092	1598.81	8.3264	AALEQPCEGSLTRPK		P84086	CPLX2_MOUSE Complexin-2 OS=Mus musculus OX=10090 GN=Cplx2 PE=1 SV=1
45.05_1598.8111n	1	#1903	3	45.0496	1598.81	8.7379	AALEQPCEGSLTRPK		P84086	CPLX2_MOUSE Complexin-2 OS=Mus musculus OX=10090 GN=Cplx2 PE=1 SV=1
45.58_1598.8122n	1	#10104	3	45.5818	1598.81	8.2478	AALEQPCEGSLTRPK		P84086	CPLX2_MOUSE Complexin-2 OS=Mus musculus OX=10090 GN=Cplx2 PE=1 SV=1
51.18_2185.0760n	1	#40330	3	51.178	2185.08	6.6892	EAEEKAALEQPCEGSLTRPK		P84086	CPLX2_MOUSE Complexin-2 OS=Mus musculus OX=10090 GN=Cplx2 PE=1 SV=1
45.09_2185.0794n	2	#28672,#26614	3,4	45.0925	2185.08	8.1398	EAEEKAALEQPCEGSLTRPK		P84086	CPLX2_MOUSE Complexin-2 OS=Mus musculus OX=10090 GN=Cplx2 PE=1 SV=1
57.00_856.4470n	1	#105468	2	57.0022	856.447	5.1105	TVYFAEK		Q9DCT8	CRIP2_MOUSE Cysteine-rich protein 2 OS=Mus musculus OX=10090 GN=Crip2 PE=1 SV=1
75.15_3324.7172n	1	#7995	4	75.1538	3324.72	7.8006	GVNIGGAGSYIYEKPQTEAPQVTGPIEVPVVR		Q9DCT8	CRIP2_MOUSE Cysteine-rich protein 2 OS=Mus musculus OX=10090 GN=Crip2 PE=1 SV=1
75.18_3324.7353n	1	#2104	3	75.1775	3324.74	8.0714	GVNIGGAGSYIYEKPQTEAPQVTGPIEVPVVR		Q9DCT8	CRIP2_MOUSE Cysteine-rich protein 2 OS=Mus musculus OX=10090 GN=Crip2 PE=1 SV=1
45.12_3303.4684n	1	#84939	5	45.1182	3303.47	7.3884	TNSDSALHQSTMTPSQAESFTGGSQDAHQKR		Q68ED7	CRTC1_MOUSE CREB-regulated transcription coactivator 1 OS=Mus musculus OX=10090 GN=Crtc1 PE=1 SV=1
44.71_3303.4691n	1	#138718	5	44.7121	3303.47	6.4127	TNSDSALHQSTMTPSQAESFTGGSQDAHQKR		Q68ED7	CRTC1_MOUSE CREB-regulated transcription coactivator 1 OS=Mus musculus OX=10090 GN=Crtc1 PE=1 SV=1
55.42_971.5928n	1	#124248	2	55.4219	971.593	6.1963	LLATVLSQK		Q6P9K8	CSKI1_MOUSE Caskin-1 OS=Mus musculus OX=10090 GN=Caskin1 PE=1 SV=2
62.19_1355.7919n	1	#130473	3	62.1949	1355.79	4.9527	TLSGPVTGLLATAR		Q6P9K8	CSKI1_MOUSE Caskin-1 OS=Mus musculus OX=10090 GN=Caskin1 PE=1 SV=2
56.91_1892.9839n	1	#21029	2	56.9118	1892.98	6.9749	ALAGLQSSSATPSPVPSPAR		Q6P9K8	CSKI1_MOUSE Caskin-1 OS=Mus musculus OX=10090 GN=Caskin1 PE=1 SV=2
56.20_1892.9865n	1	#145207	2	56.1984	1892.99	6.5265	ALAGLQSSSATPSPVPSPAR		Q6P9K8	CSKI1_MOUSE Caskin-1 OS=Mus musculus OX=10090 GN=Caskin1 PE=1 SV=2
39.98_2184.0177n	1	#52691	3	39.9819	2184.02	6.499	SVSESSPGDSPVKPPEGSSGAAR		Q6P9K8	CSKI1_MOUSE Caskin-1 OS=Mus musculus OX=10090 GN=Caskin1 PE=1 SV=2
55.31_2205.0522n	1	#141436	2	55.3054	2205.05	6.8117	HISSSQELLGDGPPGPGSPMSR		Q6P9K8	CSKI1_MOUSE Caskin-1 OS=Mus musculus OX=10090 GN=Caskin1 PE=1 SV=2
55.28_2205.0548n	1	#218428	2	55.2828	2205.05	6.8117	HISSSQELLGDGPPGPGSPMSR		Q6P9K8	CSKI1_MOUSE Caskin-1 OS=Mus musculus OX=10090 GN=Caskin1 PE=1 SV=2
38.96_2392.2182n	1	#121025	5	38.9637	2392.22	4.8411	SGSLSNVAGGRSTGGHALHAGSEGVK		Q6P9K8	CSKI1_MOUSE Caskin-1 OS=Mus musculus OX=10090 GN=Caskin1 PE=1 SV=2
39.49_2421.3417n	1	#114177	5	39.49	2421.34	5.1007	RAHGTPPPVSPKPPPPPTAPKPAK		Q6P9K8	CSKI1_MOUSE Caskin-1 OS=Mus musculus OX=10090 GN=Caskin1 PE=1 SV=2
59.48_4330.2261n	1	#17458	5	59.4802	4330.23	5.6611	KINVNFQDPDGFSALHHAALNGNTELISLLLEAQAAVDIK	[N-term] Acetyl N-TERM|[23] Deamidation N|[34] Deamidation Q	Q6P9K8	CSKI1_MOUSE Caskin-1 OS=Mus musculus OX=10090 GN=Caskin1 PE=1 SV=2
50.28_1306.5785n	1	#104766	2	50.2786	1306.58	6.2007	CNTQDYIWHK		Q71M36	CSPG5_MOUSE Chondroitin sulfate proteoglycan 5 OS=Mus musculus OX=10090 GN=Cspg5 PE=1 SV=2
52.67_1879.9037n	1	#10551	3	52.6656	1879.9	7.5139	LKEEESFNIQNSMSPK		Q71M36	CSPG5_MOUSE Chondroitin sulfate proteoglycan 5 OS=Mus musculus OX=10090 GN=Cspg5 PE=1 SV=2
57.12_1946.8544n	1	#50755	2	57.1175	1946.85	6.8885	EEAGLPAAGEDETSWTER		Q71M36	CSPG5_MOUSE Chondroitin sulfate proteoglycan 5 OS=Mus musculus OX=10090 GN=Cspg5 PE=1 SV=2
65.57_2202.0217n	1	#23352	2	65.5698	2202.02	6.2711	LEGGKGDQDDLGVNCLQNNLT		Q71M36	CSPG5_MOUSE Chondroitin sulfate proteoglycan 5 OS=Mus musculus OX=10090 GN=Cspg5 PE=1 SV=2
64.24_3911.9907n	1	#33561	5	64.2371	3911.99	6.0032	CESIITDFQVMCVAVGSAALVLLLLFMMTVFFAKK	[11] Oxidation M|[12] Carboxymethyl C	Q71M36	CSPG5_MOUSE Chondroitin sulfate proteoglycan 5 OS=Mus musculus OX=10090 GN=Cspg5 PE=1 SV=2
64.26_3911.9915n	1	#3899	5	64.2599	3911.99	6.0032	CESIITDFQVMCVAVGSAALVLLLLFMMTVFFAKK	[11] Oxidation M|[12] Carboxymethyl C	Q71M36	CSPG5_MOUSE Chondroitin sulfate proteoglycan 5 OS=Mus musculus OX=10090 GN=Cspg5 PE=1 SV=2
72.95_4305.3036n	2	#8574,#1101	4,5	72.9469	4305.3	5.8439	AGGGGPDWGPPPVLLLLGVTLVLTAGAVPARETGSAIEAEELVR		Q71M36	CSPG5_MOUSE Chondroitin sulfate proteoglycan 5 OS=Mus musculus OX=10090 GN=Cspg5 PE=1 SV=2
48.05_1817.8680n	1	#136949	2	48.0535	1817.87	7.1279	TSVQTEDDQLIAGQSAR		P26231	CTNA1_MOUSE Catenin alpha-1 OS=Mus musculus OX=10090 GN=Ctnna1 PE=1 SV=1
61.53_1909.9675n	2	#46137,#16082	2,3	61.5325	1909.97	5.3819	QALQDLLSEYMGNAGRK	[1] Deamidation Q|[11] Oxidation M	P26231	CTNA1_MOUSE Catenin alpha-1 OS=Mus musculus OX=10090 GN=Ctnna1 PE=1 SV=1
74.12_2581.3045n	1	#43417	3	74.1224	2581.3	6.0979	EHANKLIEVANLACSISNNEEGVK		P26231	CTNA1_MOUSE Catenin alpha-1 OS=Mus musculus OX=10090 GN=Ctnna1 PE=1 SV=1
57.23_2639.4855n	1	#84484	5	57.2335	2639.49	4.8473	TLAVERLLEPLVTQVTTLVNTNSK	[20] Deamidation N	P26231	CTNA1_MOUSE Catenin alpha-1 OS=Mus musculus OX=10090 GN=Ctnna1 PE=1 SV=1
97.23_572.3291n	2	#17535,#21017	1,2	97.2297	572.329	5.6031	GPSGKK		Q61301	CTNA2_MOUSE Catenin alpha-2 OS=Mus musculus OX=10090 GN=Ctnna2 PE=1 SV=3
48.05_1817.8680n	1	#136949	2	48.0535	1817.87	7.1279	TSVQTEDDQLIAGQSAR		Q61301	CTNA2_MOUSE Catenin alpha-2 OS=Mus musculus OX=10090 GN=Ctnna2 PE=1 SV=3
56.68_4109.9826n	1	#118114	4	56.6801	4109.98	5.5487	QVQEAIAGISSAAQATSPTDEAKGHTGIGELAAALNEFDNK		Q61301	CTNA2_MOUSE Catenin alpha-2 OS=Mus musculus OX=10090 GN=Ctnna2 PE=1 SV=3
68.84_3315.5329n	3	#4250,#743,#27195	3,4,5	68.8393	3315.53	7.2595	TKPFPWGDGNHTLFHNPHVNPLPTGYEDE		P43024	CX6A1_MOUSE Cytochrome c oxidase subunit 6A1_ mitochondrial OS=Mus musculus OX=10090 GN=Cox6a1 PE=1 SV=2
65.85_3584.7189n	2	#1795,#847	4,5	65.8486	3584.72	7.751	IRTKPFPWGDGNHTLFHNPHVNPLPTGYEDE		P43024	CX6A1_MOUSE Cytochrome c oxidase subunit 6A1_ mitochondrial OS=Mus musculus OX=10090 GN=Cox6a1 PE=1 SV=2
47.12_1354.6918n	1	#2894	2	47.115	1354.69	6.3278	ASSRPRPDDLEI		P23242	CXA1_MOUSE Gap junction alpha-1 protein OS=Mus musculus OX=10090 GN=Gja1 PE=1 SV=2
46.95_1539.7712n	1	#32113	2	46.9492	1539.77	5.841	VAQTDGVNVEMHLK		P23242	CXA1_MOUSE Gap junction alpha-1 protein OS=Mus musculus OX=10090 GN=Gja1 PE=1 SV=2
45.22_1894.8220n	1	#67883	2	45.2213	1894.82	7.2949	QASEQNWANYSAEQNR		P23242	CXA1_MOUSE Gap junction alpha-1 protein OS=Mus musculus OX=10090 GN=Gja1 PE=1 SV=2
57.39_2143.1410n	2	#56316,#2697	2,3	57.3923	2143.14	7.4599	VAAGHELQPLAIVDQRPSSR		P23242	CXA1_MOUSE Gap junction alpha-1 protein OS=Mus musculus OX=10090 GN=Gja1 PE=1 SV=2
57.40_2143.1508n	1	#3251	4	57.4037	2143.15	7.4599	VAAGHELQPLAIVDQRPSSR		P23242	CXA1_MOUSE Gap junction alpha-1 protein OS=Mus musculus OX=10090 GN=Gja1 PE=1 SV=2
53.08_2271.2443n	2	#8992,#4602	3,4	53.0842	2271.24	7.0676	KVAAGHELQPLAIVDQRPSSR		P23242	CXA1_MOUSE Gap junction alpha-1 protein OS=Mus musculus OX=10090 GN=Gja1 PE=1 SV=2
43.47_2414.0562n	1	#35122	3	43.4652	2414.06	6.575	NYNKQASEQNWANYSAEQNR		P23242	CXA1_MOUSE Gap junction alpha-1 protein OS=Mus musculus OX=10090 GN=Gja1 PE=1 SV=2
43.04_2414.0598n	1	#105844	3	43.0361	2414.06	6.6838	NYNKQASEQNWANYSAEQNR		P23242	CXA1_MOUSE Gap junction alpha-1 protein OS=Mus musculus OX=10090 GN=Gja1 PE=1 SV=2
56.89_2749.2283n	1	#7496	3	56.8896	2749.23	7.2487	MGQAGSTISNSHAQPFDFPDDSQNAK		P23242	CXA1_MOUSE Gap junction alpha-1 protein OS=Mus musculus OX=10090 GN=Gja1 PE=1 SV=2
52.99_2877.3110n	2	#42146,#18769	3,4	52.9917	2877.31	6.7278	MGQAGSTISNSHAQPFDFPDDSQNAKK		P23242	CXA1_MOUSE Gap junction alpha-1 protein OS=Mus musculus OX=10090 GN=Gja1 PE=1 SV=2
57.90_1167.6122n	2	#6729,#14722	2,3	57.9032	1167.61	7.1553	TGPNLHGLFGR		P62897	CYC_MOUSE Cytochrome c_ somatic OS=Mus musculus OX=10090 GN=Cycs PE=1 SV=2
58.72_1167.6149n	1	#113444	3	58.7209	1167.61	6.7689	TGPNLHGLFGR		P62897	CYC_MOUSE Cytochrome c_ somatic OS=Mus musculus OX=10090 GN=Cycs PE=1 SV=2
50.33_1295.7108n	1	#35426	3	50.3342	1295.71	6.2706	TGPNLHGLFGRK		P62897	CYC_MOUSE Cytochrome c_ somatic OS=Mus musculus OX=10090 GN=Cycs PE=1 SV=2
45.67_1432.7581n	1	#38675	3	45.6676	1432.76	6.5351	HKTGPNLHGLFGR		P62897	CYC_MOUSE Cytochrome c_ somatic OS=Mus musculus OX=10090 GN=Cycs PE=1 SV=2
45.67_1432.7673n	1	#41700	4	45.6676	1432.77	6.5351	HKTGPNLHGLFGR		P62897	CYC_MOUSE Cytochrome c_ somatic OS=Mus musculus OX=10090 GN=Cycs PE=1 SV=2
45.27_1432.7696n	1	#118158	4	45.2729	1432.77	6.362	HKTGPNLHGLFGR		P62897	CYC_MOUSE Cytochrome c_ somatic OS=Mus musculus OX=10090 GN=Cycs PE=1 SV=2
47.75_1216.6145n	1	#1229	2	47.75	1216.61	5.9678	NGPALQEAYVR		Q62418	DBNL_MOUSE Drebrin-like protein OS=Mus musculus OX=10090 GN=Dbnl PE=1 SV=2
37.85_1619.7446n	1	#125385	3	37.8542	1619.74	6.1652	QEWESAGQQAPHPR		Q62418	DBNL_MOUSE Drebrin-like protein OS=Mus musculus OX=10090 GN=Dbnl PE=1 SV=2
38.43_1619.7504n	1	#39436	3	38.4318	1619.75	5.8376	QEWESAGQQAPHPR		Q62418	DBNL_MOUSE Drebrin-like protein OS=Mus musculus OX=10090 GN=Dbnl PE=1 SV=2
40.39_1649.8349n	1	#56648	2	40.3937	1649.83	6.4542	AMSTTSVTSSQPGKLR		Q62418	DBNL_MOUSE Drebrin-like protein OS=Mus musculus OX=10090 GN=Dbnl PE=1 SV=2
40.41_1649.8398n	1	#10694	3	40.4108	1649.84	6.4542	AMSTTSVTSSQPGKLR		Q62418	DBNL_MOUSE Drebrin-like protein OS=Mus musculus OX=10090 GN=Dbnl PE=1 SV=2
51.37_1690.8262n	2	#30354,#20251	2,3	51.3701	1690.83	6.1367	KGACANHVSTMANFLK		Q62418	DBNL_MOUSE Drebrin-like protein OS=Mus musculus OX=10090 GN=Dbnl PE=1 SV=2
36.93_1876.8915n	1	#42987	3	36.9333	1876.89	7.0497	TRQEWESAGQQAPHPR		Q62418	DBNL_MOUSE Drebrin-like protein OS=Mus musculus OX=10090 GN=Dbnl PE=1 SV=2
58.39_2123.0211n	1	#90807	2	58.3937	2123.02	6.7161	ESTSFQDVGPQAPVGSVYQK		Q62418	DBNL_MOUSE Drebrin-like protein OS=Mus musculus OX=10090 GN=Dbnl PE=1 SV=2
55.86_3185.5027n	2	#50726,#27111	3,4	55.8629	3185.5	6.9165	ASGANYSFHKESTSFQDVGPQAPVGSVYQK		Q62418	DBNL_MOUSE Drebrin-like protein OS=Mus musculus OX=10090 GN=Dbnl PE=1 SV=2
35.96_1287.5588n	1	#175042	2	35.9611	1287.56	6.6082	EPVQDDSDLDR		O88485	DC1I1_MOUSE Cytoplasmic dynein 1 intermediate chain 1 OS=Mus musculus OX=10090 GN=Dync1i1 PE=1 SV=2
53.13_2045.9468n	1	#101932	2	53.1303	2045.95	7.0275	SVSTPSDAGSQDSGDLGPLTR		O88485	DC1I1_MOUSE Cytoplasmic dynein 1 intermediate chain 1 OS=Mus musculus OX=10090 GN=Dync1i1 PE=1 SV=2
53.49_2045.9489n	1	#25478	2	53.4923	2045.95	7.2778	SVSTPSDAGSQDSGDLGPLTR		O88485	DC1I1_MOUSE Cytoplasmic dynein 1 intermediate chain 1 OS=Mus musculus OX=10090 GN=Dync1i1 PE=1 SV=2
62.24_2090.9906n	1	#33626	2	62.2402	2090.99	5.4094	ELEEKDGDVQAGANLSFNR		O88485	DC1I1_MOUSE Cytoplasmic dynein 1 intermediate chain 1 OS=Mus musculus OX=10090 GN=Dync1i1 PE=1 SV=2
49.79_2800.1896n	1	#89860	3	49.7912	2800.19	5.7058	ETQTPLATHQSEEDEEDEEMVEPK		O88485	DC1I1_MOUSE Cytoplasmic dynein 1 intermediate chain 1 OS=Mus musculus OX=10090 GN=Dync1i1 PE=1 SV=2
36.04_1949.8594n	1	#144696	2	36.0412	1949.86	6.7777	SVSTPSEAGSQDSGDGAVGSR		O88487	DC1I2_MOUSE Cytoplasmic dynein 1 intermediate chain 2 OS=Mus musculus OX=10090 GN=Dync1i2 PE=1 SV=1
43.05_1585.8175n	1	#70008	3	43.0532	1585.82	5.7437	SVSSNVASVSPIPAGSK		Q8R1Q8	DC1L1_MOUSE Cytoplasmic dynein 1 light intermediate chain 1 OS=Mus musculus OX=10090 GN=Dync1li1 PE=1 SV=1
52.33_1585.8290n	1	#26848	2	52.33	1585.83	7.4055	SVSSNVASVSPIPAGSK		Q8R1Q8	DC1L1_MOUSE Cytoplasmic dynein 1 light intermediate chain 1 OS=Mus musculus OX=10090 GN=Dync1li1 PE=1 SV=1
47.18_1713.8970n	1	#34608	3	47.1837	1713.9	7.4001	SVSSNVASVSPIPAGSKK		Q8R1Q8	DC1L1_MOUSE Cytoplasmic dynein 1 light intermediate chain 1 OS=Mus musculus OX=10090 GN=Dync1li1 PE=1 SV=1
47.20_1713.9097n	1	#92432	2	47.2009	1713.91	6.349	SVSSNVASVSPIPAGSKK		Q8R1Q8	DC1L1_MOUSE Cytoplasmic dynein 1 light intermediate chain 1 OS=Mus musculus OX=10090 GN=Dync1li1 PE=1 SV=1
48.26_1749.8939n	2	#7226,#37096	3,4	48.2594	1749.89	7.4382	SGQKPVLSDVHAELDR		Q8R1Q8	DC1L1_MOUSE Cytoplasmic dynein 1 light intermediate chain 1 OS=Mus musculus OX=10090 GN=Dync1li1 PE=1 SV=1
48.35_1749.8971n	1	#48334	2	48.3452	1749.9	7.4382	SGQKPVLSDVHAELDR		Q8R1Q8	DC1L1_MOUSE Cytoplasmic dynein 1 light intermediate chain 1 OS=Mus musculus OX=10090 GN=Dync1li1 PE=1 SV=1
43.72_1877.9900n	1	#70057	3	43.7227	1877.99	5.6341	KSGQKPVLSDVHAELDR		Q8R1Q8	DC1L1_MOUSE Cytoplasmic dynein 1 light intermediate chain 1 OS=Mus musculus OX=10090 GN=Dync1li1 PE=1 SV=1
57.52_2120.1306n	1	#9470	4	57.5189	2120.13	5.9333	SGQKPVLSDVHAELDRITR		Q8R1Q8	DC1L1_MOUSE Cytoplasmic dynein 1 light intermediate chain 1 OS=Mus musculus OX=10090 GN=Dync1li1 PE=1 SV=1
39.80_2213.1156n	1	#58967	3	39.7988	2213.12	6.3865	ITRKPASVSPTTPTSPTEGEAS		Q8R1Q8	DC1L1_MOUSE Cytoplasmic dynein 1 light intermediate chain 1 OS=Mus musculus OX=10090 GN=Dync1li1 PE=1 SV=1
39.40_2213.1157n	1	#78239	3	39.4042	2213.12	7.189	ITRKPASVSPTTPTSPTEGEAS		Q8R1Q8	DC1L1_MOUSE Cytoplasmic dynein 1 light intermediate chain 1 OS=Mus musculus OX=10090 GN=Dync1li1 PE=1 SV=1
45.41_2459.2305n	1	#78970	3	45.4102	2459.23	5.5986	KTGSPGGPGVGGSPGGGAAGASPSLPPSAK		Q8R1Q8	DC1L1_MOUSE Cytoplasmic dynein 1 light intermediate chain 1 OS=Mus musculus OX=10090 GN=Dync1li1 PE=1 SV=1
54.37_512.3031n	1	#7228	1	54.3667	512.303	0	PGIAR		Q99KJ8	DCTN2_MOUSE Dynactin subunit 2 OS=Mus musculus OX=10090 GN=Dctn2 PE=1 SV=3
54.37_740.4187n	1	#53671	1	54.3667	740.419	0	DLPGIAR		Q99KJ8	DCTN2_MOUSE Dynactin subunit 2 OS=Mus musculus OX=10090 GN=Dctn2 PE=1 SV=3
54.34_974.5172n	2	#49243,#4435	1,2	54.343	974.517	7.3586	YADLPGIAR		Q99KJ8	DCTN2_MOUSE Dynactin subunit 2 OS=Mus musculus OX=10090 GN=Dctn2 PE=1 SV=3
50.66_1106.5782n	1	#16803	2	50.6648	1106.58	6.4991	GLDFSDRIGK		Q99KJ8	DCTN2_MOUSE Dynactin subunit 2 OS=Mus musculus OX=10090 GN=Dctn2 PE=1 SV=3
75.18_1581.8305n	1	#149434	3	75.1775	1581.83	4.9919	WSPVASTLPELVQR		Q99KJ8	DCTN2_MOUSE Dynactin subunit 2 OS=Mus musculus OX=10090 GN=Dctn2 PE=1 SV=3
72.18_1990.0601n	1	#15199	3	72.1784	1990.06	5.8801	LLGPDAAINLADPDGALAKR		Q99KJ8	DCTN2_MOUSE Dynactin subunit 2 OS=Mus musculus OX=10090 GN=Dctn2 PE=1 SV=3
55.42_2850.5106n	1	#20660	5	55.4219	2850.51	5.7456	VHQLYETIQRWSPVASTLPELVQR	[23] Deamidation Q	Q99KJ8	DCTN2_MOUSE Dynactin subunit 2 OS=Mus musculus OX=10090 GN=Dctn2 PE=1 SV=3
54.20_901.4742n	1	#4186	1	54.2009	901.474	5.9438	ELMSGLPR		Q9DBN9	DDX59_MOUSE Probable ATP-dependent RNA helicase DDX59 OS=Mus musculus OX=10090 GN=Ddx59 PE=1 SV=1
71.48_4422.0369n	2	#809,#1333	4,5	71.4814	4422.04	6.344	DTPVHTSVTEEAVTADKPGHASSTNSPSCQLAEVSSTGPDEGVK		Q9DBN9	DDX59_MOUSE Probable ATP-dependent RNA helicase DDX59 OS=Mus musculus OX=10090 GN=Ddx59 PE=1 SV=1
65.14_1180.6058n	1	#28355	2	65.1386	1180.61	5.5882	NLVCTDLFTR		P54823	DDX6_MOUSE Probable ATP-dependent RNA helicase DDX6 OS=Mus musculus OX=10090 GN=Ddx6 PE=1 SV=1
48.00_1904.9602n	1	#69831	2	48.002	1904.96	6.601	ASAGPGGGGTQPQPQLNQLK		P54823	DDX6_MOUSE Probable ATP-dependent RNA helicase DDX6 OS=Mus musculus OX=10090 GN=Ddx6 PE=1 SV=1
54.11_3001.4463n	1	#102635	3	54.1062	3001.45	6.0791	NTSTINNGTPQQAQSMAATIKPGDDWKK		P54823	DDX6_MOUSE Probable ATP-dependent RNA helicase DDX6 OS=Mus musculus OX=10090 GN=Ddx6 PE=1 SV=1
64.28_726.4278n	2	#5673,#33023	1,2	64.2831	726.428	6.0049	DLAAIPK		Q9WV69	DEMA_MOUSE Dematin OS=Mus musculus OX=10090 GN=Dmtn PE=1 SV=1
43.26_1149.5803n	1	#85168	3	43.2591	1149.58	5.9647	MILKEEMEK		Q9WV69	DEMA_MOUSE Dematin OS=Mus musculus OX=10090 GN=Dmtn PE=1 SV=1
52.29_1240.5902n	1	#43759	2	52.293	1240.59	5.8723	VFAMSPEEFGK		Q9WV69	DEMA_MOUSE Dematin OS=Mus musculus OX=10090 GN=Dmtn PE=1 SV=1
43.19_1766.8687n	2	#44885,#11294	3,4	43.1905	1766.87	0	PDRTPFHTSLHSGTSK		Q9WV69	DEMA_MOUSE Dematin OS=Mus musculus OX=10090 GN=Dmtn PE=1 SV=1
42.66_1766.8694n	1	#37064	4	42.6643	1766.87	0	PDRTPFHTSLHSGTSK		Q9WV69	DEMA_MOUSE Dematin OS=Mus musculus OX=10090 GN=Dmtn PE=1 SV=1
42.65_1766.8776n	1	#104326	4	42.6472	1766.88	0	PDRTPFHTSLHSGTSK		Q9WV69	DEMA_MOUSE Dematin OS=Mus musculus OX=10090 GN=Dmtn PE=1 SV=1
43.19_1766.8836n	1	#48066	4	43.1905	1766.88	0	PDRTPFHTSLHSGTSK		Q9WV69	DEMA_MOUSE Dematin OS=Mus musculus OX=10090 GN=Dmtn PE=1 SV=1
43.17_1966.9836n	2	#108480,#6821	2,4	43.1733	1966.98	7.1553	SLPDRTPFHTSLHSGTSK		Q9WV69	DEMA_MOUSE Dematin OS=Mus musculus OX=10090 GN=Dmtn PE=1 SV=1
42.65_1966.9877n	2	#43991,#22948	3,4	42.6472	1966.99	7.0716	SLPDRTPFHTSLHSGTSK		Q9WV69	DEMA_MOUSE Dematin OS=Mus musculus OX=10090 GN=Dmtn PE=1 SV=1
43.02_1967.0664n	1	#121207	4	43.0189	1967.07	7.1553	SLPDRTPFHTSLHSGTSK		Q9WV69	DEMA_MOUSE Dematin OS=Mus musculus OX=10090 GN=Dmtn PE=1 SV=1
42.01_2018.0494n	1	#47465	4	42.0123	2018.05	5.1543	MDNQVLGYKDLAAIPKDK		Q9WV69	DEMA_MOUSE Dematin OS=Mus musculus OX=10090 GN=Dmtn PE=1 SV=1
47.46_2146.1289n	1	#125487	5	47.4583	2146.13	0	PETTRPDSNIYKKPPIYK		Q9WV69	DEMA_MOUSE Dematin OS=Mus musculus OX=10090 GN=Dmtn PE=1 SV=1
34.65_2237.8755n	1	#133393	3	34.6457	2237.88	6.4642	KGAEEEEEEEDDDSEEEIK		Q9WV69	DEMA_MOUSE Dematin OS=Mus musculus OX=10090 GN=Dmtn PE=1 SV=1
42.42_1915.8655n	1	#62898	2	42.4241	1915.87	6.7316	QETGITEGQGPVGEEEEK		Q9CQJ6	DENR_MOUSE Density-regulated protein OS=Mus musculus OX=10090 GN=Denr PE=1 SV=1
46.86_2043.9843n	1	#72133	3	46.8634	2043.98	5.5668	QETGITEGQGPVGEEEEKK		Q9CQJ6	DENR_MOUSE Density-regulated protein OS=Mus musculus OX=10090 GN=Denr PE=1 SV=1
50.61_1195.6699n	1	#17572	2	50.6101	1195.67	5.4767	LQHGSILGFPK		P26443	DHE3_MOUSE Glutamate dehydrogenase 1_ mitochondrial OS=Mus musculus OX=10090 GN=Glud1 PE=1 SV=1
41.62_1582.7725n	1	#44134	2	41.6234	1582.77	6.3439	IIAEGANGPTTPEADK		P26443	DHE3_MOUSE Glutamate dehydrogenase 1_ mitochondrial OS=Mus musculus OX=10090 GN=Glud1 PE=1 SV=1
74.80_1914.9183n	1	#24106	2	74.7971	1914.92	6.5391	GFIGPGIDVPAPDMSTGER		P26443	DHE3_MOUSE Glutamate dehydrogenase 1_ mitochondrial OS=Mus musculus OX=10090 GN=Glud1 PE=1 SV=1
74.39_1914.9279n	1	#95220	2	74.3856	1914.93	6.2926	GFIGPGIDVPAPDMSTGER		P26443	DHE3_MOUSE Glutamate dehydrogenase 1_ mitochondrial OS=Mus musculus OX=10090 GN=Glud1 PE=1 SV=1
69.73_1957.0257n	1	#15655	3	69.7262	1957.03	5.3893	ELEDFKLQHGSILGFPK		P26443	DHE3_MOUSE Glutamate dehydrogenase 1_ mitochondrial OS=Mus musculus OX=10090 GN=Glud1 PE=1 SV=1
67.02_2043.0143n	1	#65056	2	67.0157	2043.01	6.1494	KGFIGPGIDVPAPDMSTGER		P26443	DHE3_MOUSE Glutamate dehydrogenase 1_ mitochondrial OS=Mus musculus OX=10090 GN=Glud1 PE=1 SV=1
57.12_2163.0636n	3	#42575,#4746,#8070	2,3,4	57.1175	2163.06	6.8792	ISGASEKDIVHSGLAYTMER		P26443	DHE3_MOUSE Glutamate dehydrogenase 1_ mitochondrial OS=Mus musculus OX=10090 GN=Glud1 PE=1 SV=1
70.42_1339.6981n	1	#16237	2	70.4192	1339.7	6.0783	IVGYPASFMSLR		Q33DR3	DLP1_MOUSE Decaprenyl-diphosphate synthase subunit 2 OS=Mus musculus OX=10090 GN=Pdss2 PE=1 SV=2
71.61_4245.1727n	1	#12152	5	71.6139	4245.17	5.1868	VVELLSSALMDLVHGVYQENSASTKENSIPDDIGISTWK		Q33DR3	DLP1_MOUSE Decaprenyl-diphosphate synthase subunit 2 OS=Mus musculus OX=10090 GN=Pdss2 PE=1 SV=2
43.34_1346.6843n	1	#27664	2	43.3449	1346.68	7.6674	TSKAEELLAEEK		Q8K1M6	DNM1L_MOUSE Dynamin-1-like protein OS=Mus musculus OX=10090 GN=Dnm1l PE=1 SV=2
43.81_1346.6928n	1	#22309	3	43.8085	1346.69	7.8323	TSKAEELLAEEK		Q8K1M6	DNM1L_MOUSE Dynamin-1-like protein OS=Mus musculus OX=10090 GN=Dnm1l PE=1 SV=2
77.46_1579.8862n	2	#13211,#34527	2,3	77.4617	1579.89	6.758	LHDAIVEVVTCLLR		Q8K1M6	DNM1L_MOUSE Dynamin-1-like protein OS=Mus musculus OX=10090 GN=Dnm1l PE=1 SV=2
51.14_1899.1305n	1	#40839	4	51.1381	1899.13	5.3655	RPLILQLVHVSPEDKR		Q8K1M6	DNM1L_MOUSE Dynamin-1-like protein OS=Mus musculus OX=10090 GN=Dnm1l PE=1 SV=2
52.39_2125.9750n	1	#63590	3	52.3878	2125.98	8.2907	NVPSAGGGIGDGGQEPTTGNWR		Q8K1M6	DNM1L_MOUSE Dynamin-1-like protein OS=Mus musculus OX=10090 GN=Dnm1l PE=1 SV=2
51.55_2125.9797n	1	#86200	2	51.5548	2125.98	8.1572	NVPSAGGGIGDGGQEPTTGNWR		Q8K1M6	DNM1L_MOUSE Dynamin-1-like protein OS=Mus musculus OX=10090 GN=Dnm1l PE=1 SV=2
52.29_2125.9803n	1	#13444	2	52.293	2125.98	8.2907	NVPSAGGGIGDGGQEPTTGNWR		Q8K1M6	DNM1L_MOUSE Dynamin-1-like protein OS=Mus musculus OX=10090 GN=Dnm1l PE=1 SV=2
51.49_2160.0689n	1	#32335	2	51.4858	2160.07	8.0027	VPSALAPASQEPPPAASAEADGK		Q8K1M6	DNM1L_MOUSE Dynamin-1-like protein OS=Mus musculus OX=10090 GN=Dnm1l PE=1 SV=2
83.52_2325.2750n	1	#11814	3	83.5222	2325.27	5.4803	NATGPRPALFVPEVSFELLVK	[N-term] Acetyl N-TERM	Q8K1M6	DNM1L_MOUSE Dynamin-1-like protein OS=Mus musculus OX=10090 GN=Dnm1l PE=1 SV=2
65.45_2405.2651n	1	#17715	4	65.4528	2405.27	6.2362	AEELLAEEKSKPIPIMPASPQK		Q8K1M6	DNM1L_MOUSE Dynamin-1-like protein OS=Mus musculus OX=10090 GN=Dnm1l PE=1 SV=2
100.39_3034.8591n	1	#75851	3	100.393	3034.86	5.5506	AYAVLLPLAAGLLLLLFVGLFITYVMLK		Q9Z324	DPM2_MOUSE Dolichol phosphate-mannose biosynthesis regulatory protein OS=Mus musculus OX=10090 GN=Dpm2 PE=3 SV=3
86.30_4533.4463n	1	#17878	5	86.2966	4533.45	5.3905	ATGTDQAVGFGLVAVSLIIFTYYTTWVILLPFIDSQHVIHK		Q9Z324	DPM2_MOUSE Dolichol phosphate-mannose biosynthesis regulatory protein OS=Mus musculus OX=10090 GN=Dpm2 PE=3 SV=3
41.64_544.2839n	1	#57997	1	41.6405	544.284	6.5016	ADLAR		Q9D1Q4	DPM3_MOUSE Dolichol-phosphate mannosyltransferase subunit 3 OS=Mus musculus OX=10090 GN=Dpm3 PE=1 SV=1
90.20_3454.8330n	1	#180912	5	90.1958	3454.83	5.3574	LTQWLWGLALLGSAWAALTMGALGLELPFPCR		Q9D1Q4	DPM3_MOUSE Dolichol-phosphate mannosyltransferase subunit 3 OS=Mus musculus OX=10090 GN=Dpm3 PE=1 SV=1
39.01_531.3145n	1	#91712	1	39.0095	531.314	7.222	FIPR		P97427	DPYL1_MOUSE Dihydropyrimidinase-related protein 1 OS=Mus musculus OX=10090 GN=Crmp1 PE=1 SV=1
39.03_531.3169n	1	#45471	1	39.0266	531.317	7.222	FIPR		P97427	DPYL1_MOUSE Dihydropyrimidinase-related protein 1 OS=Mus musculus OX=10090 GN=Crmp1 PE=1 SV=1
45.51_690.3538n	1	#1006	1	45.5132	690.354	8.0237	SNITSLG		P97427	DPYL1_MOUSE Dihydropyrimidinase-related protein 1 OS=Mus musculus OX=10090 GN=Crmp1 PE=1 SV=1
34.27_765.4477n	1	#124544	2	34.2682	765.448	8.0254	IVAPPGGR		P97427	DPYL1_MOUSE Dihydropyrimidinase-related protein 1 OS=Mus musculus OX=10090 GN=Crmp1 PE=1 SV=1
58.24_877.4290n	1	#112074	1	58.2364	877.429	5.6278	MTVVWDK		P97427	DPYL1_MOUSE Dihydropyrimidinase-related protein 1 OS=Mus musculus OX=10090 GN=Crmp1 PE=1 SV=1
61.49_921.5047n	2	#59075,#37200	1,2	61.4888	921.505	8.1492	IFNLYPR		P97427	DPYL1_MOUSE Dihydropyrimidinase-related protein 1 OS=Mus musculus OX=10090 GN=Crmp1 PE=1 SV=1
55.65_999.5718n	2	#10283,#871	1,2	55.6539	999.572	6.7752	SAADIIALAR		P97427	DPYL1_MOUSE Dihydropyrimidinase-related protein 1 OS=Mus musculus OX=10090 GN=Crmp1 PE=1 SV=1
39.44_1000.5312n	1	#31137	2	39.4385	1000.53	5.9707	VFGLHSVSR		P97427	DPYL1_MOUSE Dihydropyrimidinase-related protein 1 OS=Mus musculus OX=10090 GN=Crmp1 PE=1 SV=1
45.84_1000.5377n	1	#10077	2	45.8393	1000.54	8.1609	VFGLHSVSR		P97427	DPYL1_MOUSE Dihydropyrimidinase-related protein 1 OS=Mus musculus OX=10090 GN=Crmp1 PE=1 SV=1
39.76_1215.6680n	1	#21812	3	39.7645	1215.67	7.3013	SKVFGLHSVSR		P97427	DPYL1_MOUSE Dihydropyrimidinase-related protein 1 OS=Mus musculus OX=10090 GN=Crmp1 PE=1 SV=1
39.46_1215.6694n	1	#62187	3	39.4556	1215.67	7.2788	SKVFGLHSVSR		P97427	DPYL1_MOUSE Dihydropyrimidinase-related protein 1 OS=Mus musculus OX=10090 GN=Crmp1 PE=1 SV=1
60.69_1306.6683n	1	#15761	2	60.687	1306.67	6.924	IVFEDGNISVSK		P97427	DPYL1_MOUSE Dihydropyrimidinase-related protein 1 OS=Mus musculus OX=10090 GN=Crmp1 PE=1 SV=1
62.06_1322.7546n	1	#2158	2	62.0596	1322.75	8.5425	QIGENLIVPGGVK		P97427	DPYL1_MOUSE Dihydropyrimidinase-related protein 1 OS=Mus musculus OX=10090 GN=Crmp1 PE=1 SV=1
57.03_1519.8835n	1	#15708	3	57.0251	1519.88	6.4335	SIPHITSDRLLIR		P97427	DPYL1_MOUSE Dihydropyrimidinase-related protein 1 OS=Mus musculus OX=10090 GN=Crmp1 PE=1 SV=1
60.41_1622.7673n	1	#159	2	60.4099	1622.77	9.0063	GMYDGPVYEVPATPK		P97427	DPYL1_MOUSE Dihydropyrimidinase-related protein 1 OS=Mus musculus OX=10090 GN=Crmp1 PE=1 SV=1
59.67_1622.7747n	1	#2175	2	59.6656	1622.77	8.6043	GMYDGPVYEVPATPK		P97427	DPYL1_MOUSE Dihydropyrimidinase-related protein 1 OS=Mus musculus OX=10090 GN=Crmp1 PE=1 SV=1
55.31_1724.8098n	1	#2825	2	55.3054	1724.81	8.7299	MDENQFVAVTSTNAAK		P97427	DPYL1_MOUSE Dihydropyrimidinase-related protein 1 OS=Mus musculus OX=10090 GN=Crmp1 PE=1 SV=1
54.93_1724.8153n	1	#17537	2	54.9347	1724.82	8.6112	MDENQFVAVTSTNAAK		P97427	DPYL1_MOUSE Dihydropyrimidinase-related protein 1 OS=Mus musculus OX=10090 GN=Crmp1 PE=1 SV=1
48.64_1826.9602n	2	#130654,#36300	2,5	48.6371	1826.96	7.1902	FIPRKPFPEHLYQR		P97427	DPYL1_MOUSE Dihydropyrimidinase-related protein 1 OS=Mus musculus OX=10090 GN=Crmp1 PE=1 SV=1
48.60_1826.9906n	1	#9029	4	48.6027	1826.99	7.289	FIPRKPFPEHLYQR		P97427	DPYL1_MOUSE Dihydropyrimidinase-related protein 1 OS=Mus musculus OX=10090 GN=Crmp1 PE=1 SV=1
48.37_1826.9929n	2	#21777,#109425	4,5	48.3709	1826.99	7.3457	FIPRKPFPEHLYQR		P97427	DPYL1_MOUSE Dihydropyrimidinase-related protein 1 OS=Mus musculus OX=10090 GN=Crmp1 PE=1 SV=1
71.30_1957.9787n	1	#18055	3	71.299	1957.98	7.9723	IAVGSDADVVIWDPDKMK		P97427	DPYL1_MOUSE Dihydropyrimidinase-related protein 1 OS=Mus musculus OX=10090 GN=Crmp1 PE=1 SV=1
68.77_2157.1008n	1	#15341	2	68.7689	2157.1	8.2509	AVGKDNFTLIPEGVNGIEER		P97427	DPYL1_MOUSE Dihydropyrimidinase-related protein 1 OS=Mus musculus OX=10090 GN=Crmp1 PE=1 SV=1
52.85_2226.0410n	1	#4462	3	52.8516	2226.04	8.2872	NLHQSNFSLSGAQIDDNNPR		P97427	DPYL1_MOUSE Dihydropyrimidinase-related protein 1 OS=Mus musculus OX=10090 GN=Crmp1 PE=1 SV=1
52.90_2226.0419n	1	#28016	2	52.8982	2226.04	8.2872	NLHQSNFSLSGAQIDDNNPR		P97427	DPYL1_MOUSE Dihydropyrimidinase-related protein 1 OS=Mus musculus OX=10090 GN=Crmp1 PE=1 SV=1
67.68_2330.2705n	1	#58639	4	67.6828	2330.27	6.604	GLGAVILVHAENGDLIAQEQKR		P97427	DPYL1_MOUSE Dihydropyrimidinase-related protein 1 OS=Mus musculus OX=10090 GN=Crmp1 PE=1 SV=1
49.43_2382.1427n	1	#1749	3	49.4263	2382.14	8.2209	NLHQSNFSLSGAQIDDNNPRR		P97427	DPYL1_MOUSE Dihydropyrimidinase-related protein 1 OS=Mus musculus OX=10090 GN=Crmp1 PE=1 SV=1
49.43_2382.1476n	1	#2724	4	49.4263	2382.15	8.2209	NLHQSNFSLSGAQIDDNNPRR		P97427	DPYL1_MOUSE Dihydropyrimidinase-related protein 1 OS=Mus musculus OX=10090 GN=Crmp1 PE=1 SV=1
52.50_2453.1961n	1	#123296	3	52.499	2453.2	7.2327	GMYDGPVYEVPATPKHAAPAPSAK		P97427	DPYL1_MOUSE Dihydropyrimidinase-related protein 1 OS=Mus musculus OX=10090 GN=Crmp1 PE=1 SV=1
52.33_2453.2782n	1	#107210	4	52.33	2453.28	6.6516	GMYDGPVYEVPATPKHAAPAPSAK		P97427	DPYL1_MOUSE Dihydropyrimidinase-related protein 1 OS=Mus musculus OX=10090 GN=Crmp1 PE=1 SV=1
95.51_2840.4468n	1	#93880	3	95.5119	2840.45	7.2371	AALAGGTTMIIDHVVPEPGSSLLTSFEK		P97427	DPYL1_MOUSE Dihydropyrimidinase-related protein 1 OS=Mus musculus OX=10090 GN=Crmp1 PE=1 SV=1
64.56_3051.5106n	1	#18140	3	64.5609	3051.51	6.5406	HQPPPIRNLHQSNFSLSGAQIDDNNPR		P97427	DPYL1_MOUSE Dihydropyrimidinase-related protein 1 OS=Mus musculus OX=10090 GN=Crmp1 PE=1 SV=1
83.79_3344.6090n	1	#10876	3	83.7872	3344.61	7.4441	MVIPGGIDVNTYLQKPSQGMTSADDFFQGTK		P97427	DPYL1_MOUSE Dihydropyrimidinase-related protein 1 OS=Mus musculus OX=10090 GN=Crmp1 PE=1 SV=1
83.31_3344.6174n	1	#37990	3	83.305	3344.62	7.3377	MVIPGGIDVNTYLQKPSQGMTSADDFFQGTK		P97427	DPYL1_MOUSE Dihydropyrimidinase-related protein 1 OS=Mus musculus OX=10090 GN=Crmp1 PE=1 SV=1
69.54_4976.3850n	1	#11348	5	69.5351	4976.38	6.9436	NWAKAAAFVTSPPLSPDPTTPDYLTSLLACGDLQVTGSGHCPYSTAQK		P97427	DPYL1_MOUSE Dihydropyrimidinase-related protein 1 OS=Mus musculus OX=10090 GN=Crmp1 PE=1 SV=1
57.19_343.1931n	1	#11797	1	57.1872	343.193	0	MVI		O08553	DPYL2_MOUSE Dihydropyrimidinase-related protein 2 OS=Mus musculus OX=10090 GN=Dpysl2 PE=1 SV=2
58.57_360.1793n	1	#145364	1	58.5744	360.179	0	VFN		O08553	DPYL2_MOUSE Dihydropyrimidinase-related protein 2 OS=Mus musculus OX=10090 GN=Dpysl2 PE=1 SV=2
58.00_360.1797n	1	#17018	1	58.0003	360.18	0	VFN		O08553	DPYL2_MOUSE Dihydropyrimidinase-related protein 2 OS=Mus musculus OX=10090 GN=Dpysl2 PE=1 SV=2
58.00_434.2279n	1	#4443	1	58.0003	434.228	0	YPR		O08553	DPYL2_MOUSE Dihydropyrimidinase-related protein 2 OS=Mus musculus OX=10090 GN=Dpysl2 PE=1 SV=2
58.53_434.2281n	1	#33316	1	58.5288	434.228	0	YPR		O08553	DPYL2_MOUSE Dihydropyrimidinase-related protein 2 OS=Mus musculus OX=10090 GN=Dpysl2 PE=1 SV=2
41.66_444.2446n	1	#97625	1	41.6577	444.245	0	AQAR		O08553	DPYL2_MOUSE Dihydropyrimidinase-related protein 2 OS=Mus musculus OX=10090 GN=Dpysl2 PE=1 SV=2
58.00_547.3065n	1	#59577	1	58.0003	547.307	0	LYPR		O08553	DPYL2_MOUSE Dihydropyrimidinase-related protein 2 OS=Mus musculus OX=10090 GN=Dpysl2 PE=1 SV=2
58.00_547.3120n	1	#14327	1	58.0003	547.312	0	LYPR		O08553	DPYL2_MOUSE Dihydropyrimidinase-related protein 2 OS=Mus musculus OX=10090 GN=Dpysl2 PE=1 SV=2
41.45_557.3252n	1	#121412	1	41.4518	557.325	0	IAQAR		O08553	DPYL2_MOUSE Dihydropyrimidinase-related protein 2 OS=Mus musculus OX=10090 GN=Dpysl2 PE=1 SV=2
41.66_557.3286n	1	#83910	1	41.6577	557.329	0	IAQAR		O08553	DPYL2_MOUSE Dihydropyrimidinase-related protein 2 OS=Mus musculus OX=10090 GN=Dpysl2 PE=1 SV=2
41.43_557.3288n	1	#55010	1	41.4346	557.329	0	IAQAR		O08553	DPYL2_MOUSE Dihydropyrimidinase-related protein 2 OS=Mus musculus OX=10090 GN=Dpysl2 PE=1 SV=2
57.19_626.3140n	1	#47483	1	57.1872	626.314	0	DVHTR		O08553	DPYL2_MOUSE Dihydropyrimidinase-related protein 2 OS=Mus musculus OX=10090 GN=Dpysl2 PE=1 SV=2
58.00_644.3264n	1	#165746	1	58.0003	644.326	0	NLYPR		O08553	DPYL2_MOUSE Dihydropyrimidinase-related protein 2 OS=Mus musculus OX=10090 GN=Dpysl2 PE=1 SV=2
55.99_659.3648n	1	#136123	1	55.9879	659.365	0	VIWDK		O08553	DPYL2_MOUSE Dihydropyrimidinase-related protein 2 OS=Mus musculus OX=10090 GN=Dpysl2 PE=1 SV=2
57.96_661.3551n	1	#1326	1	57.9569	661.355	0	NLYPR		O08553	DPYL2_MOUSE Dihydropyrimidinase-related protein 2 OS=Mus musculus OX=10090 GN=Dpysl2 PE=1 SV=2
47.37_674.3640n	1	#82	1	47.3724	674.364	8.7709	ANITSLG		O08553	DPYL2_MOUSE Dihydropyrimidinase-related protein 2 OS=Mus musculus OX=10090 GN=Dpysl2 PE=1 SV=2
51.97_711.4061n	1	#62557	2	51.9714	711.406	0	FVYKR		O08553	DPYL2_MOUSE Dihydropyrimidinase-related protein 2 OS=Mus musculus OX=10090 GN=Dpysl2 PE=1 SV=2
56.22_746.3967n	1	#59140	1	56.2219	746.397	0	SVIWDK		O08553	DPYL2_MOUSE Dihydropyrimidinase-related protein 2 OS=Mus musculus OX=10090 GN=Dpysl2 PE=1 SV=2
34.27_765.4477n	1	#124544	2	34.2682	765.448	8.0254	IVAPPGGR		O08553	DPYL2_MOUSE Dihydropyrimidinase-related protein 2 OS=Mus musculus OX=10090 GN=Dpysl2 PE=1 SV=2
55.99_877.4360n	1	#18278	1	55.9879	877.436	8.7125	MSVIWDK		O08553	DPYL2_MOUSE Dihydropyrimidinase-related protein 2 OS=Mus musculus OX=10090 GN=Dpysl2 PE=1 SV=2
55.99_877.4383n	1	#10721	2	55.9879	877.438	8.7125	MSVIWDK		O08553	DPYL2_MOUSE Dihydropyrimidinase-related protein 2 OS=Mus musculus OX=10090 GN=Dpysl2 PE=1 SV=2
56.93_884.4463n	1	#38791	2	56.9339	884.446	0	DDNIPRR		O08553	DPYL2_MOUSE Dihydropyrimidinase-related protein 2 OS=Mus musculus OX=10090 GN=Dpysl2 PE=1 SV=2
56.96_884.4467n	1	#25563	2	56.9564	884.447	0	DDNIPRR		O08553	DPYL2_MOUSE Dihydropyrimidinase-related protein 2 OS=Mus musculus OX=10090 GN=Dpysl2 PE=1 SV=2
57.97_907.4901n	2	#4401,#927	1,2	57.9676	907.49	8.8522	VFNLYPR		O08553	DPYL2_MOUSE Dihydropyrimidinase-related protein 2 OS=Mus musculus OX=10090 GN=Dpysl2 PE=1 SV=2
58.57_907.4923n	2	#53314,#7362	1,2	58.5744	907.492	8.6421	VFNLYPR		O08553	DPYL2_MOUSE Dihydropyrimidinase-related protein 2 OS=Mus musculus OX=10090 GN=Dpysl2 PE=1 SV=2
41.16_1014.5415n	2	#214243,#7406	1,2	41.1601	1014.54	8.7816	SAAEVIAQAR		O08553	DPYL2_MOUSE Dihydropyrimidinase-related protein 2 OS=Mus musculus OX=10090 GN=Dpysl2 PE=1 SV=2
41.47_1014.5420n	1	#112256	1	41.4689	1014.54	8.9625	SAAEVIAQAR		O08553	DPYL2_MOUSE Dihydropyrimidinase-related protein 2 OS=Mus musculus OX=10090 GN=Dpysl2 PE=1 SV=2
41.66_1014.5487n	1	#3427	2	41.6577	1014.55	8.9625	SAAEVIAQAR		O08553	DPYL2_MOUSE Dihydropyrimidinase-related protein 2 OS=Mus musculus OX=10090 GN=Dpysl2 PE=1 SV=2
46.08_1057.6474n	2	#4434,#70274	2,3	46.0826	1057.65	8.2662	ITSDRLLIK		O08553	DPYL2_MOUSE Dihydropyrimidinase-related protein 2 OS=Mus musculus OX=10090 GN=Dpysl2 PE=1 SV=2
45.65_1057.6495n	2	#23292,#189606	2,3	45.6505	1057.65	8.1407	ITSDRLLIK		O08553	DPYL2_MOUSE Dihydropyrimidinase-related protein 2 OS=Mus musculus OX=10090 GN=Dpysl2 PE=1 SV=2
55.25_1083.6266n	2	#124378,#25560	1,2	55.2482	1083.63	8.5417	GSPLVVISQGK		O08553	DPYL2_MOUSE Dihydropyrimidinase-related protein 2 OS=Mus musculus OX=10090 GN=Dpysl2 PE=1 SV=2
46.28_1251.6827n	1	#27102	3	46.2799	1251.68	6.7821	TTQRIVAPPGGR		O08553	DPYL2_MOUSE Dihydropyrimidinase-related protein 2 OS=Mus musculus OX=10090 GN=Dpysl2 PE=1 SV=2
57.18_1293.6862n	2	#1629,#2134	2,3	57.1756	1293.69	8.5841	MVIPGGIDVHTR		O08553	DPYL2_MOUSE Dihydropyrimidinase-related protein 2 OS=Mus musculus OX=10090 GN=Dpysl2 PE=1 SV=2
51.93_1295.7023n	1	#7867	2	51.9345	1295.7	8.4704	KPFPDFVYKR		O08553	DPYL2_MOUSE Dihydropyrimidinase-related protein 2 OS=Mus musculus OX=10090 GN=Dpysl2 PE=1 SV=2
60.06_1301.7347n	1	#9835	2	60.0635	1301.73	0	SVIWDKAVVTGK		O08553	DPYL2_MOUSE Dihydropyrimidinase-related protein 2 OS=Mus musculus OX=10090 GN=Dpysl2 PE=1 SV=2
62.06_1322.7546n	1	#2158	2	62.0596	1322.75	8.5425	QIGENLIVPGGVK		O08553	DPYL2_MOUSE Dihydropyrimidinase-related protein 2 OS=Mus musculus OX=10090 GN=Dpysl2 PE=1 SV=2
56.96_1421.8000n	1	#575	2	56.9564	1421.8	8.3063	IVAPPGGRANITSLG		O08553	DPYL2_MOUSE Dihydropyrimidinase-related protein 2 OS=Mus musculus OX=10090 GN=Dpysl2 PE=1 SV=2
56.61_1421.8015n	1	#6751	2	56.6109	1421.8	7.9377	IVAPPGGRANITSLG		O08553	DPYL2_MOUSE Dihydropyrimidinase-related protein 2 OS=Mus musculus OX=10090 GN=Dpysl2 PE=1 SV=2
60.06_1432.7728n	2	#2264,#2525	2,3	60.0635	1432.77	8.4953	MSVIWDKAVVTGK		O08553	DPYL2_MOUSE Dihydropyrimidinase-related protein 2 OS=Mus musculus OX=10090 GN=Dpysl2 PE=1 SV=2
64.98_1562.7680n	1	#30	2	64.9767	1562.77	9.2097	GLYDGPVCEVSVTPK		O08553	DPYL2_MOUSE Dihydropyrimidinase-related protein 2 OS=Mus musculus OX=10090 GN=Dpysl2 PE=1 SV=2
64.26_1562.7693n	1	#963	2	64.2599	1562.77	8.9832	GLYDGPVCEVSVTPK		O08553	DPYL2_MOUSE Dihydropyrimidinase-related protein 2 OS=Mus musculus OX=10090 GN=Dpysl2 PE=1 SV=2
58.93_1668.9041n	2	#3949,#55664	3,4	58.9289	1668.9	7.767	YIPRKPFPDFVYK		O08553	DPYL2_MOUSE Dihydropyrimidinase-related protein 2 OS=Mus musculus OX=10090 GN=Dpysl2 PE=1 SV=2
54.70_1681.8638n	1	#9706	3	54.7017	1681.86	8.5474	IVLEDGTLHVTEGSGR		O08553	DPYL2_MOUSE Dihydropyrimidinase-related protein 2 OS=Mus musculus OX=10090 GN=Dpysl2 PE=1 SV=2
55.31_1724.8098n	1	#2825	2	55.3054	1724.81	8.7299	MDENQFVAVTSTNAAK		O08553	DPYL2_MOUSE Dihydropyrimidinase-related protein 2 OS=Mus musculus OX=10090 GN=Dpysl2 PE=1 SV=2
54.93_1724.8153n	1	#17537	2	54.9347	1724.82	8.6112	MDENQFVAVTSTNAAK		O08553	DPYL2_MOUSE Dihydropyrimidinase-related protein 2 OS=Mus musculus OX=10090 GN=Dpysl2 PE=1 SV=2
64.35_1764.9079n	1	#359	2	64.3531	1764.91	9.073	SITIANQTNCPLYVTK		O08553	DPYL2_MOUSE Dihydropyrimidinase-related protein 2 OS=Mus musculus OX=10090 GN=Dpysl2 PE=1 SV=2
64.15_1791.8301n	1	#10657	2	64.1461	1791.83	8.2544	DNFTLIPEGTNGTEER		O08553	DPYL2_MOUSE Dihydropyrimidinase-related protein 2 OS=Mus musculus OX=10090 GN=Dpysl2 PE=1 SV=2
72.37_1864.9228n	1	#4971	2	72.3681	1864.92	7.2	SITIANQTNCPLYVTK	[N-term] Acetyl N-TERM|[10] Carboxymethyl C	O08553	DPYL2_MOUSE Dihydropyrimidinase-related protein 2 OS=Mus musculus OX=10090 GN=Dpysl2 PE=1 SV=2
62.58_1972.0032n	2	#30773,#9024	2,3	62.5763	1972	7.5248	GVPRGLYDGPVCEVSVTPK		O08553	DPYL2_MOUSE Dihydropyrimidinase-related protein 2 OS=Mus musculus OX=10090 GN=Dpysl2 PE=1 SV=2
59.90_2117.1464n	1	#82844	3	59.8954	2117.15	7.6025	QIGENLIVPGGVKTIEAHSR		O08553	DPYL2_MOUSE Dihydropyrimidinase-related protein 2 OS=Mus musculus OX=10090 GN=Dpysl2 PE=1 SV=2
57.63_2147.0526n	2	#508,#190	2,3	57.6309	2147.05	9.1993	AVGKDNFTLIPEGTNGTEER		O08553	DPYL2_MOUSE Dihydropyrimidinase-related protein 2 OS=Mus musculus OX=10090 GN=Dpysl2 PE=1 SV=2
75.44_2149.9116n	2	#1890,#35319	2,3	75.4404	2149.91	8.9708	FQMPDQGMTSADDFFQGTK		O08553	DPYL2_MOUSE Dihydropyrimidinase-related protein 2 OS=Mus musculus OX=10090 GN=Dpysl2 PE=1 SV=2
61.49_2168.0616n	1	#628	3	61.4888	2168.06	8.8184	NLHQSGFSLSGAQIDDNIPR		O08553	DPYL2_MOUSE Dihydropyrimidinase-related protein 2 OS=Mus musculus OX=10090 GN=Dpysl2 PE=1 SV=2
61.96_2168.0626n	2	#233,#54	2,3	61.9598	2168.06	9.1645	NLHQSGFSLSGAQIDDNIPR		O08553	DPYL2_MOUSE Dihydropyrimidinase-related protein 2 OS=Mus musculus OX=10090 GN=Dpysl2 PE=1 SV=2
66.53_2169.0483n	2	#8220,#3531	2,3	66.5302	2169.05	8.2147	NLHQSGFSLSGAQIDDNIPR	[1] Deamidation N	O08553	DPYL2_MOUSE Dihydropyrimidinase-related protein 2 OS=Mus musculus OX=10090 GN=Dpysl2 PE=1 SV=2
65.38_2169.0640n	1	#14995	3	65.3814	2169.06	8.2124	NLHQSGFSLSGAQIDDNIPR	[4] Deamidation Q	O08553	DPYL2_MOUSE Dihydropyrimidinase-related protein 2 OS=Mus musculus OX=10090 GN=Dpysl2 PE=1 SV=2
69.29_2210.1367n	2	#35139,#4528	2,3	69.2856	2210.14	8.4406	SITIANQTNCPLYVTKVMSK		O08553	DPYL2_MOUSE Dihydropyrimidinase-related protein 2 OS=Mus musculus OX=10090 GN=Dpysl2 PE=1 SV=2
56.96_2324.1657n	2	#150,#201	3,4	56.9564	2324.17	9.0349	NLHQSGFSLSGAQIDDNIPRR		O08553	DPYL2_MOUSE Dihydropyrimidinase-related protein 2 OS=Mus musculus OX=10090 GN=Dpysl2 PE=1 SV=2
63.10_2405.2080n	1	#40627	3	63.105	2405.21	7.7414	GLYDGPVCEVSVTPKTVTPASSAK		O08553	DPYL2_MOUSE Dihydropyrimidinase-related protein 2 OS=Mus musculus OX=10090 GN=Dpysl2 PE=1 SV=2
77.84_2415.2534n	1	#1148	3	77.8352	2415.25	8.6778	ISVGSDADLVIWDPDSVKTISAK		O08553	DPYL2_MOUSE Dihydropyrimidinase-related protein 2 OS=Mus musculus OX=10090 GN=Dpysl2 PE=1 SV=2
68.50_2424.1522n	1	#3650	3	68.4973	2424.15	8.137	GTVVYGEPITASLGTDGSHYWSK		O08553	DPYL2_MOUSE Dihydropyrimidinase-related protein 2 OS=Mus musculus OX=10090 GN=Dpysl2 PE=1 SV=2
61.62_2552.2481n	1	#131378	3	61.6205	2552.25	7.2205	KGTVVYGEPITASLGTDGSHYWSK		O08553	DPYL2_MOUSE Dihydropyrimidinase-related protein 2 OS=Mus musculus OX=10090 GN=Dpysl2 PE=1 SV=2
84.69_2614.2923n	1	#6504	3	84.6883	2614.29	8.4601	MDENQFVAVTSTNAAKVFNLYPR		O08553	DPYL2_MOUSE Dihydropyrimidinase-related protein 2 OS=Mus musculus OX=10090 GN=Dpysl2 PE=1 SV=2
76.86_2747.4779n	1	#17886	3	76.864	2747.48	8.184	GSPLVVISQGKIVLEDGTLHVTEGSGR		O08553	DPYL2_MOUSE Dihydropyrimidinase-related protein 2 OS=Mus musculus OX=10090 GN=Dpysl2 PE=1 SV=2
76.84_2747.4811n	1	#15203	4	76.8403	2747.48	8.184	GSPLVVISQGKIVLEDGTLHVTEGSGR		O08553	DPYL2_MOUSE Dihydropyrimidinase-related protein 2 OS=Mus musculus OX=10090 GN=Dpysl2 PE=1 SV=2
69.93_2899.5080n	2	#256,#35	3,4	69.9255	2899.51	9.3894	ILDLGITGPEGHVLSRPEEVEAEAVNR		O08553	DPYL2_MOUSE Dihydropyrimidinase-related protein 2 OS=Mus musculus OX=10090 GN=Dpysl2 PE=1 SV=2
69.61_2923.4113n	2	#4875,#2202	3,4	69.6074	2923.41	8.4501	GTVVYGEPITASLGTDGSHYWSKNWAK		O08553	DPYL2_MOUSE Dihydropyrimidinase-related protein 2 OS=Mus musculus OX=10090 GN=Dpysl2 PE=1 SV=2
60.38_2944.4906n	2	#2431,#431	3,4	60.3751	2944.49	8.87	QQAPPVRNLHQSGFSLSGAQIDDNIPR		O08553	DPYL2_MOUSE Dihydropyrimidinase-related protein 2 OS=Mus musculus OX=10090 GN=Dpysl2 PE=1 SV=2
80.05_3425.5907n	1	#1556	4	80.0498	3425.59	8.0708	MVIPGGIDVHTRFQMPDQGMTSADDFFQGTK		O08553	DPYL2_MOUSE Dihydropyrimidinase-related protein 2 OS=Mus musculus OX=10090 GN=Dpysl2 PE=1 SV=2
79.55_3425.6023n	1	#12103	4	79.5479	3425.6	7.8556	MVIPGGIDVHTRFQMPDQGMTSADDFFQGTK		O08553	DPYL2_MOUSE Dihydropyrimidinase-related protein 2 OS=Mus musculus OX=10090 GN=Dpysl2 PE=1 SV=2
82.31_4646.3888n	1	#9437	5	82.3088	4646.39	7.6335	ILDLGITGPEGHVLSRPEEVEAEAVNRSITIANQTNCPLYVTK		O08553	DPYL2_MOUSE Dihydropyrimidinase-related protein 2 OS=Mus musculus OX=10090 GN=Dpysl2 PE=1 SV=2
55.72_574.2832n	1	#3134	1	55.718	574.283	0	DEGVR		Q62188	DPYL3_MOUSE Dihydropyrimidinase-related protein 3 OS=Mus musculus OX=10090 GN=Dpysl3 PE=1 SV=1
61.53_661.3552n	1	#30295	1	61.5326	661.355	0	NLYPR		Q62188	DPYL3_MOUSE Dihydropyrimidinase-related protein 3 OS=Mus musculus OX=10090 GN=Dpysl3 PE=1 SV=1
34.27_765.4477n	1	#124544	2	34.2682	765.448	8.0254	IVAPPGGR		Q62188	DPYL3_MOUSE Dihydropyrimidinase-related protein 3 OS=Mus musculus OX=10090 GN=Dpysl3 PE=1 SV=1
55.99_877.4360n	1	#18278	1	55.9879	877.436	8.7125	MSVIWDK		Q62188	DPYL3_MOUSE Dihydropyrimidinase-related protein 3 OS=Mus musculus OX=10090 GN=Dpysl3 PE=1 SV=1
55.99_877.4383n	1	#10721	2	55.9879	877.438	8.7125	MSVIWDK		Q62188	DPYL3_MOUSE Dihydropyrimidinase-related protein 3 OS=Mus musculus OX=10090 GN=Dpysl3 PE=1 SV=1
61.49_921.5047n	2	#59075,#37200	1,2	61.4888	921.505	8.1492	IFNLYPR		Q62188	DPYL3_MOUSE Dihydropyrimidinase-related protein 3 OS=Mus musculus OX=10090 GN=Dpysl3 PE=1 SV=1
46.08_1057.6474n	2	#4434,#70274	2,3	46.0826	1057.65	8.2662	ITSDRLLIK		Q62188	DPYL3_MOUSE Dihydropyrimidinase-related protein 3 OS=Mus musculus OX=10090 GN=Dpysl3 PE=1 SV=1
45.65_1057.6495n	2	#23292,#189606	2,3	45.6505	1057.65	8.1407	ITSDRLLIK		Q62188	DPYL3_MOUSE Dihydropyrimidinase-related protein 3 OS=Mus musculus OX=10090 GN=Dpysl3 PE=1 SV=1
73.74_1640.7800n	1	#4567	2	73.7407	1640.78	7.9551	GMYDGPVFDLTTTPK		Q62188	DPYL3_MOUSE Dihydropyrimidinase-related protein 3 OS=Mus musculus OX=10090 GN=Dpysl3 PE=1 SV=1
73.06_1640.7834n	1	#55229	2	73.0638	1640.78	7.1167	GMYDGPVFDLTTTPK		Q62188	DPYL3_MOUSE Dihydropyrimidinase-related protein 3 OS=Mus musculus OX=10090 GN=Dpysl3 PE=1 SV=1
55.31_1724.8098n	1	#2825	2	55.3054	1724.81	8.7299	MDENQFVAVTSTNAAK		Q62188	DPYL3_MOUSE Dihydropyrimidinase-related protein 3 OS=Mus musculus OX=10090 GN=Dpysl3 PE=1 SV=1
54.93_1724.8153n	1	#17537	2	54.9347	1724.82	8.6112	MDENQFVAVTSTNAAK		Q62188	DPYL3_MOUSE Dihydropyrimidinase-related protein 3 OS=Mus musculus OX=10090 GN=Dpysl3 PE=1 SV=1
54.44_2029.9810n	2	#18815,#8796	2,3	54.4368	2029.98	8.041	NLHQSGFSLSGTQVDEGVR		Q62188	DPYL3_MOUSE Dihydropyrimidinase-related protein 3 OS=Mus musculus OX=10090 GN=Dpysl3 PE=1 SV=1
54.08_2117.0313n	1	#57112	2	54.0827	2117.03	7.286	AIGKDNFTAIPEGTNGVEER		Q62188	DPYL3_MOUSE Dihydropyrimidinase-related protein 3 OS=Mus musculus OX=10090 GN=Dpysl3 PE=1 SV=1
54.06_2117.0345n	1	#14865	3	54.0593	2117.03	7.1066	AIGKDNFTAIPEGTNGVEER		Q62188	DPYL3_MOUSE Dihydropyrimidinase-related protein 3 OS=Mus musculus OX=10090 GN=Dpysl3 PE=1 SV=1
81.45_2996.4552n	1	#76836	3	81.4519	2996.46	5.9117	MLEMGITGPEGHVLSRPEELEAEAVFR		Q62188	DPYL3_MOUSE Dihydropyrimidinase-related protein 3 OS=Mus musculus OX=10090 GN=Dpysl3 PE=1 SV=1
39.01_531.3145n	1	#91712	1	39.0095	531.314	7.222	FIPR		O35098	DPYL4_MOUSE Dihydropyrimidinase-related protein 4 OS=Mus musculus OX=10090 GN=Dpysl4 PE=1 SV=1
39.03_531.3169n	1	#45471	1	39.0266	531.317	7.222	FIPR		O35098	DPYL4_MOUSE Dihydropyrimidinase-related protein 4 OS=Mus musculus OX=10090 GN=Dpysl4 PE=1 SV=1
46.08_1057.6474n	2	#4434,#70274	2,3	46.0826	1057.65	8.2662	ITSDRLLIK		O35098	DPYL4_MOUSE Dihydropyrimidinase-related protein 4 OS=Mus musculus OX=10090 GN=Dpysl4 PE=1 SV=1
45.65_1057.6495n	2	#23292,#189606	2,3	45.6505	1057.65	8.1407	ITSDRLLIK		O35098	DPYL4_MOUSE Dihydropyrimidinase-related protein 4 OS=Mus musculus OX=10090 GN=Dpysl4 PE=1 SV=1
40.12_1260.6947n	1	#64552	3	40.1191	1260.69	6.0875	NRLAEIHGVPR		O35098	DPYL4_MOUSE Dihydropyrimidinase-related protein 4 OS=Mus musculus OX=10090 GN=Dpysl4 PE=1 SV=1
50.19_1299.6883n	1	#31060	3	50.1879	1299.69	6.0942	ASCSGKISVPPVR		O35098	DPYL4_MOUSE Dihydropyrimidinase-related protein 4 OS=Mus musculus OX=10090 GN=Dpysl4 PE=1 SV=1
55.26_1422.7011n	1	#40251	2	55.2598	1422.7	5.831	MSVVWEKCVASGK		O35098	DPYL4_MOUSE Dihydropyrimidinase-related protein 4 OS=Mus musculus OX=10090 GN=Dpysl4 PE=1 SV=1
47.97_2139.0187n	1	#56751	4	47.9677	2139.02	6.0929	NLHQSGFSLSGSQADDHIAR		O35098	DPYL4_MOUSE Dihydropyrimidinase-related protein 4 OS=Mus musculus OX=10090 GN=Dpysl4 PE=1 SV=1
52.03_2139.0277n	2	#21312,#2054	2,4	52.0254	2139.03	6.9105	NLHQSGFSLSGSQADDHIAR		O35098	DPYL4_MOUSE Dihydropyrimidinase-related protein 4 OS=Mus musculus OX=10090 GN=Dpysl4 PE=1 SV=1
68.77_2157.1008n	1	#15341	2	68.7689	2157.1	8.2509	AVGKDNFTLIPEGVNGIEER		O35098	DPYL4_MOUSE Dihydropyrimidinase-related protein 4 OS=Mus musculus OX=10090 GN=Dpysl4 PE=1 SV=1
49.46_400.1419n	1	#51213	1	49.4606	400.142	0	EMGT		Q9EQF6	DPYL5_MOUSE Dihydropyrimidinase-related protein 5 OS=Mus musculus OX=10090 GN=Dpysl5 PE=1 SV=1
53.83_588.3030n	1	#12387	1	53.8258	588.303	0	VWER		Q9EQF6	DPYL5_MOUSE Dihydropyrimidinase-related protein 5 OS=Mus musculus OX=10090 GN=Dpysl5 PE=1 SV=1
49.53_926.4839n	1	#98103	2	49.5294	926.484	0	TPTRPVTR		Q9EQF6	DPYL5_MOUSE Dihydropyrimidinase-related protein 5 OS=Mus musculus OX=10090 GN=Dpysl5 PE=1 SV=1
52.62_1422.7124n	1	#87572	3	52.6215	1422.71	5.6162	VHAENGELVAEGAK		Q9EQF6	DPYL5_MOUSE Dihydropyrimidinase-related protein 5 OS=Mus musculus OX=10090 GN=Dpysl5 PE=1 SV=1
42.89_1422.7165n	1	#40700	3	42.8873	1422.72	5.9685	VHAENGELVAEGAK		Q9EQF6	DPYL5_MOUSE Dihydropyrimidinase-related protein 5 OS=Mus musculus OX=10090 GN=Dpysl5 PE=1 SV=1
59.87_1692.9438n	1	#49620	3	59.8729	1692.94	5.503	TPYLGDVAIVVHPGKK		Q9EQF6	DPYL5_MOUSE Dihydropyrimidinase-related protein 5 OS=Mus musculus OX=10090 GN=Dpysl5 PE=1 SV=1
47.34_1738.8325n	2	#116203,#112660	2,3	47.3381	1738.83	6.097	MDENRFVAVTSSNAAK		Q9EQF6	DPYL5_MOUSE Dihydropyrimidinase-related protein 5 OS=Mus musculus OX=10090 GN=Dpysl5 PE=1 SV=1
49.48_1740.8807n	1	#16920	2	49.4778	1740.88	6.7687	EMGTPLADTPTRPVTR		Q9EQF6	DPYL5_MOUSE Dihydropyrimidinase-related protein 5 OS=Mus musculus OX=10090 GN=Dpysl5 PE=1 SV=1
58.31_2197.0411n	3	#17947,#3735,#23853	2,3,4	58.3109	2197.04	7.5352	DLHESSFSLSGSQIDDHVPK		Q9EQF6	DPYL5_MOUSE Dihydropyrimidinase-related protein 5 OS=Mus musculus OX=10090 GN=Dpysl5 PE=1 SV=1
53.92_2353.1593n	2	#111055,#2251	3,4	53.9194	2353.16	6.048	DLHESSFSLSGSQIDDHVPKR		Q9EQF6	DPYL5_MOUSE Dihydropyrimidinase-related protein 5 OS=Mus musculus OX=10090 GN=Dpysl5 PE=1 SV=1
45.48_780.4472n	1	#40488	2	45.4789	780.447	0	PTPIPTR		Q9QXS6	DREB_MOUSE Drebrin OS=Mus musculus OX=10090 GN=Dbn1 PE=1 SV=4
45.48_982.5210n	1	#23216	2	45.4789	982.521	6.3859	MAPTPIPTR		Q9QXS6	DREB_MOUSE Drebrin OS=Mus musculus OX=10090 GN=Dbn1 PE=1 SV=4
109.23_1580.6799n	1	#134251	2	109.231	1580.68	6.6376	EDENAEPVGTTYQK	[4] Deamidation N	Q9QXS6	DREB_MOUSE Drebrin OS=Mus musculus OX=10090 GN=Dbn1 PE=1 SV=4
38.27_1848.8859n	2	#74073,#17040	2,3	38.2688	1848.89	7.7617	LREDENAEPVGTTYQK		Q9QXS6	DREB_MOUSE Drebrin OS=Mus musculus OX=10090 GN=Dbn1 PE=1 SV=4
37.44_1848.8885n	1	#39082	3	37.4424	1848.89	7.8935	LREDENAEPVGTTYQK		Q9QXS6	DREB_MOUSE Drebrin OS=Mus musculus OX=10090 GN=Dbn1 PE=1 SV=4
51.49_1874.8746n	1	#53472	2	51.4858	1874.87	7.0271	SPSDSSTASTPIAEQIER		Q9QXS6	DREB_MOUSE Drebrin OS=Mus musculus OX=10090 GN=Dbn1 PE=1 SV=4
51.99_1874.8864n	1	#7464	2	51.989	1874.89	8.0196	SPSDSSTASTPIAEQIER		Q9QXS6	DREB_MOUSE Drebrin OS=Mus musculus OX=10090 GN=Dbn1 PE=1 SV=4
48.14_2005.9663n	1	#141596	3	48.1392	2005.97	5.9295	TPNLSSSLPCSHLDSHRR		Q9QXS6	DREB_MOUSE Drebrin OS=Mus musculus OX=10090 GN=Dbn1 PE=1 SV=4
50.85_2309.1840n	1	#15351	4	50.8538	2309.18	6.1987	KSESEVEEAAAIIAQRPDNPR		Q9QXS6	DREB_MOUSE Drebrin OS=Mus musculus OX=10090 GN=Dbn1 PE=1 SV=4
47.86_2425.1317n	2	#41923,#31712	3,4	47.8616	2425.13	6.4706	LKEQSIFGDQRDEEEESQMK		Q9QXS6	DREB_MOUSE Drebrin OS=Mus musculus OX=10090 GN=Dbn1 PE=1 SV=4
74.55_2760.3441n	1	#3894	4	74.5517	2760.34	6.9466	SESEVEEAAAIIAQRPDNPREFFR		Q9QXS6	DREB_MOUSE Drebrin OS=Mus musculus OX=10090 GN=Dbn1 PE=1 SV=4
74.55_2760.3523n	1	#10947	3	74.5517	2760.35	6.9466	SESEVEEAAAIIAQRPDNPREFFR		Q9QXS6	DREB_MOUSE Drebrin OS=Mus musculus OX=10090 GN=Dbn1 PE=1 SV=4
59.69_2839.4046n	1	#3128	3	59.6887	2839.4	7.6647	MAPTPIPTRSPSDSSTASTPIAEQIER		Q9QXS6	DREB_MOUSE Drebrin OS=Mus musculus OX=10090 GN=Dbn1 PE=1 SV=4
58.91_2839.4067n	1	#102708	3	58.9063	2839.41	6.847	MAPTPIPTRSPSDSSTASTPIAEQIER		Q9QXS6	DREB_MOUSE Drebrin OS=Mus musculus OX=10090 GN=Dbn1 PE=1 SV=4
82.24_3335.7071n	1	#15795	4	82.2376	3335.71	6.3976	AVVLDESSASVAELPPDGPAHLLLAALQHEMR		Q05922	DUS2_MOUSE Dual specificity protein phosphatase 2 OS=Mus musculus OX=10090 GN=Dusp2 PE=1 SV=2
82.31_3335.7088n	1	#8176	5	82.3088	3335.71	6.3976	AVVLDESSASVAELPPDGPAHLLLAALQHEMR		Q05922	DUS2_MOUSE Dual specificity protein phosphatase 2 OS=Mus musculus OX=10090 GN=Dusp2 PE=1 SV=2
49.37_602.3024n	1	#77973	1	49.3746	602.302	5.6427	DLMPK		P39053	DYN1_MOUSE Dynamin-1 OS=Mus musculus OX=10090 GN=Dnm1 PE=1 SV=2
73.88_646.3431n	2	#26040,#21253	1,2	73.8831	646.343	5.4921	DFLPR		P39053	DYN1_MOUSE Dynamin-1 OS=Mus musculus OX=10090 GN=Dnm1 PE=1 SV=2
43.84_876.4676n	1	#81926	2	43.8428	876.468	7.1276	GYIGVVNR		P39053	DYN1_MOUSE Dynamin-1 OS=Mus musculus OX=10090 GN=Dnm1 PE=1 SV=2
44.23_876.4789n	1	#18431	2	44.2317	876.479	5.652	GYIGVVNR		P39053	DYN1_MOUSE Dynamin-1 OS=Mus musculus OX=10090 GN=Dnm1 PE=1 SV=2
43.84_876.4790n	1	#99795	1	43.8428	876.479	7.1276	GYIGVVNR		P39053	DYN1_MOUSE Dynamin-1 OS=Mus musculus OX=10090 GN=Dnm1 PE=1 SV=2
51.33_974.4921n	1	#83548	2	51.3255	974.492	5.5576	TVRDLMPK	[6] Oxidation M	P39053	DYN1_MOUSE Dynamin-1 OS=Mus musculus OX=10090 GN=Dnm1 PE=1 SV=2
54.80_1030.5442n	1	#132578	1	54.7953	1030.54	5.7563	DITAALAAER		P39053	DYN1_MOUSE Dynamin-1 OS=Mus musculus OX=10090 GN=Dnm1 PE=1 SV=2
79.60_1111.5517n	1	#30860	1	79.5957	1111.55	5.6317	DMLMQFVTK		P39053	DYN1_MOUSE Dynamin-1 OS=Mus musculus OX=10090 GN=Dnm1 PE=1 SV=2
51.75_1152.5689n	1	#94016	3	51.7514	1152.57	6.2091	FFLSHPSYR		P39053	DYN1_MOUSE Dynamin-1 OS=Mus musculus OX=10090 GN=Dnm1 PE=1 SV=2
52.11_1152.5709n	1	#74132	2	52.1082	1152.57	6.0072	FFLSHPSYR		P39053	DYN1_MOUSE Dynamin-1 OS=Mus musculus OX=10090 GN=Dnm1 PE=1 SV=2
45.39_1280.6682n	1	#15617	3	45.3931	1280.67	6.3445	KFFLSHPSYR		P39053	DYN1_MOUSE Dynamin-1 OS=Mus musculus OX=10090 GN=Dnm1 PE=1 SV=2
48.17_1334.7279n	1	#89107	2	48.1736	1334.73	5.6764	VLNQQLTNHIR		P39053	DYN1_MOUSE Dynamin-1 OS=Mus musculus OX=10090 GN=Dnm1 PE=1 SV=2
54.53_1399.7987n	1	#73844	2	54.5287	1399.8	5.9975	NKLQSQLLSIEK		P39053	DYN1_MOUSE Dynamin-1 OS=Mus musculus OX=10090 GN=Dnm1 PE=1 SV=2
43.94_1528.7307n	2	#775,#412	2,3	43.9429	1528.73	6.0988	HLADRMGTPYLQK		P39053	DYN1_MOUSE Dynamin-1 OS=Mus musculus OX=10090 GN=Dnm1 PE=1 SV=2
54.55_1639.8601n	2	#26690,#57461	2,3	54.5522	1639.86	5.8017	EVDPQGQRTIGVITK		P39053	DYN1_MOUSE Dynamin-1 OS=Mus musculus OX=10090 GN=Dnm1 PE=1 SV=2
79.32_1734.9016n	2	#8937,#7809	2,3	79.3185	1734.9	6.8786	SSVLENFVGRDFLPR		P39053	DYN1_MOUSE Dynamin-1 OS=Mus musculus OX=10090 GN=Dnm1 PE=1 SV=2
79.04_1734.9046n	1	#59624	3	79.0378	1734.9	7.1093	SSVLENFVGRDFLPR		P39053	DYN1_MOUSE Dynamin-1 OS=Mus musculus OX=10090 GN=Dnm1 PE=1 SV=2
57.03_1744.8629n	1	#35999	2	57.0251	1744.86	5.9342	FFLSHPSYRHLADR		P39053	DYN1_MOUSE Dynamin-1 OS=Mus musculus OX=10090 GN=Dnm1 PE=1 SV=2
50.41_2022.9646n	1	#167834	2	50.4076	2022.96	6.0789	RIEGSGDQIDTYELSGGAR		P39053	DYN1_MOUSE Dynamin-1 OS=Mus musculus OX=10090 GN=Dnm1 PE=1 SV=2
62.41_2087.1513n	2	#15088,#12916	3,4	62.4114	2087.15	6.4066	VLNQQLTNHIRDTLPGLR		P39053	DYN1_MOUSE Dynamin-1 OS=Mus musculus OX=10090 GN=Dnm1 PE=1 SV=2
62.72_2087.1571n	1	#79954	3	62.7229	2087.16	6.1774	VLNQQLTNHIRDTLPGLR		P39053	DYN1_MOUSE Dynamin-1 OS=Mus musculus OX=10090 GN=Dnm1 PE=1 SV=2
83.69_2257.1779n	1	#19305	3	83.692	2257.18	6.0423	ENCLILAVSPANSDLANSDALK		P39053	DYN1_MOUSE Dynamin-1 OS=Mus musculus OX=10090 GN=Dnm1 PE=1 SV=2
58.84_2496.0079n	1	#179607	3	58.8379	2496.01	6.0927	ASETEENGSDSFMHSMDPQLER		P39053	DYN1_MOUSE Dynamin-1 OS=Mus musculus OX=10090 GN=Dnm1 PE=1 SV=2
58.79_2496.0219n	1	#122203	3	58.7912	2496.02	6.0256	ASETEENGSDSFMHSMDPQLER		P39053	DYN1_MOUSE Dynamin-1 OS=Mus musculus OX=10090 GN=Dnm1 PE=1 SV=2
95.93_3786.9494n	1	#103717	5	95.927	3786.95	5.8731	VYSPHVLNLTLVDLPGMTKVPVGDQPPDIEFQIR		P39053	DYN1_MOUSE Dynamin-1 OS=Mus musculus OX=10090 GN=Dnm1 PE=1 SV=2
95.83_3786.9876n	1	#95043	5	95.8292	3786.99	5.8731	VYSPHVLNLTLVDLPGMTKVPVGDQPPDIEFQIR		P39053	DYN1_MOUSE Dynamin-1 OS=Mus musculus OX=10090 GN=Dnm1 PE=1 SV=2
86.03_3786.9962n	1	#5925	5	86.0286	3787	6.2564	VYSPHVLNLTLVDLPGMTKVPVGDQPPDIEFQIR		P39053	DYN1_MOUSE Dynamin-1 OS=Mus musculus OX=10090 GN=Dnm1 PE=1 SV=2
85.96_3787.0203n	1	#23909	4	85.9552	3787.02	6.2564	VYSPHVLNLTLVDLPGMTKVPVGDQPPDIEFQIR		P39053	DYN1_MOUSE Dynamin-1 OS=Mus musculus OX=10090 GN=Dnm1 PE=1 SV=2
65.66_3957.0400n	1	#1160	4	65.6628	3957.04	7.1416	GPAPGPPPAGSALGGAPPVPSRPGASPDPFGPPPQVPSRPNR		P39053	DYN1_MOUSE Dynamin-1 OS=Mus musculus OX=10090 GN=Dnm1 PE=1 SV=2
65.69_3958.0297n	1	#17295	5	65.6861	3958.03	5.9499	GPAPGPPPAGSALGGAPPVPSRPGASPDPFGPPPQVPSRPNR	[41] Deamidation N	P39053	DYN1_MOUSE Dynamin-1 OS=Mus musculus OX=10090 GN=Dnm1 PE=1 SV=2
79.04_1734.9046n	1	#59624	3	79.0378	1734.9	7.1093	SSVLENFVGRDFLPR		Q8BZ98	DYN3_MOUSE Dynamin-3 OS=Mus musculus OX=10090 GN=Dnm3 PE=1 SV=1
62.59_3132.7240n	1	#77277	5	62.5874	3132.72	5.0431	APPSVPSRRPPPSPTRPTIIRPLESSLLD		Q8BZ98	DYN3_MOUSE Dynamin-3 OS=Mus musculus OX=10090 GN=Dnm3 PE=1 SV=1
45.17_1180.6260n	1	#16185	3	45.1697	1180.63	6.9948	LQHPDMLVTK		Q9Z2H5	E41L1_MOUSE Band 4.1-like protein 1 OS=Mus musculus OX=10090 GN=Epb41l1 PE=1 SV=2
44.75_1180.6277n	1	#61623	3	44.7464	1180.63	6.7034	LQHPDMLVTK		Q9Z2H5	E41L1_MOUSE Band 4.1-like protein 1 OS=Mus musculus OX=10090 GN=Epb41l1 PE=1 SV=2
45.79_1661.7930n	1	#14838	2	45.7878	1661.79	7.5697	VSAADSTQVDGGTPMVK		Q9Z2H5	E41L1_MOUSE Band 4.1-like protein 1 OS=Mus musculus OX=10090 GN=Epb41l1 PE=1 SV=2
64.29_1716.8827n	2	#11584,#7037	2,3	64.2946	1716.88	6.3482	QASALIDRPAPFFER		Q9Z2H5	E41L1_MOUSE Band 4.1-like protein 1 OS=Mus musculus OX=10090 GN=Epb41l1 PE=1 SV=2
54.50_1837.9921n	3	#62503,#12733,#4298	2,3,4	54.4979	1837.99	7.0091	HKQEFLDKPEDVLLK		Q9Z2H5	E41L1_MOUSE Band 4.1-like protein 1 OS=Mus musculus OX=10090 GN=Epb41l1 PE=1 SV=2
54.77_1837.9962n	1	#11709	4	54.7721	1838	6.6843	HKQEFLDKPEDVLLK		Q9Z2H5	E41L1_MOUSE Band 4.1-like protein 1 OS=Mus musculus OX=10090 GN=Epb41l1 PE=1 SV=2
66.81_2402.2410n	1	#27703	4	66.8077	2402.24	6.1709	TQAQTRQASALIDRPAPFFER		Q9Z2H5	E41L1_MOUSE Band 4.1-like protein 1 OS=Mus musculus OX=10090 GN=Epb41l1 PE=1 SV=2
39.70_2469.2840n	2	#88969,#19850	3,4	39.6958	2469.28	5.527	IIITGDEDVDQDQALALAIKEAK	[13] Deamidation Q	Q9Z2H5	E41L1_MOUSE Band 4.1-like protein 1 OS=Mus musculus OX=10090 GN=Epb41l1 PE=1 SV=2
43.62_2727.2472n	1	#102462	5	43.6197	2727.25	6.7636	SLDGAEFSRPASVSENHDAGPEGDKR		Q9Z2H5	E41L1_MOUSE Band 4.1-like protein 1 OS=Mus musculus OX=10090 GN=Epb41l1 PE=1 SV=2
74.77_3279.7011n	2	#21506,#7623	3,4	74.7735	3279.7	7.3219	SLSPIIGKDVLTSTYGATAETLSTSTTTHVTK		Q9Z2H5	E41L1_MOUSE Band 4.1-like protein 1 OS=Mus musculus OX=10090 GN=Epb41l1 PE=1 SV=2
58.51_3342.4772n	1	#113919	5	58.5061	3342.48	6.2895	APESDMGDEDQDQERDAVFLKDNHLAIER		Q9Z2H5	E41L1_MOUSE Band 4.1-like protein 1 OS=Mus musculus OX=10090 GN=Epb41l1 PE=1 SV=2
58.28_3342.4879n	1	#14471	5	58.2807	3342.49	5.6326	APESDMGDEDQDQERDAVFLKDNHLAIER		Q9Z2H5	E41L1_MOUSE Band 4.1-like protein 1 OS=Mus musculus OX=10090 GN=Epb41l1 PE=1 SV=2
59.32_3343.4752n	1	#32889	5	59.3173	3343.48	5.8657	APESDMGDEDQDQERDAVFLKDNHLAIER	[11] Deamidation Q	Q9Z2H5	E41L1_MOUSE Band 4.1-like protein 1 OS=Mus musculus OX=10090 GN=Epb41l1 PE=1 SV=2
50.50_3449.5565n	1	#42524	4	50.4991	3449.56	5.9794	HLTQQDTRPAEQSLDMDDKDYSEADGLSER		Q9Z2H5	E41L1_MOUSE Band 4.1-like protein 1 OS=Mus musculus OX=10090 GN=Epb41l1 PE=1 SV=2
46.93_3523.6299n	1	#50391	4	46.932	3523.63	6.4211	AQEETPQQPEAAAAVTTPVTPAGHSHPETNSNEK		Q9Z2H5	E41L1_MOUSE Band 4.1-like protein 1 OS=Mus musculus OX=10090 GN=Epb41l1 PE=1 SV=2
46.54_3523.6398n	1	#114593	4	46.5373	3523.64	6.3278	AQEETPQQPEAAAAVTTPVTPAGHSHPETNSNEK		Q9Z2H5	E41L1_MOUSE Band 4.1-like protein 1 OS=Mus musculus OX=10090 GN=Epb41l1 PE=1 SV=2
43.93_3652.7342n	2	#79132,#165477	4,5	43.9286	3652.73	6.1091	KAQEETPQQPEAAAAVTTPVTPAGHSHPETNSNEK	[31] Deamidation N	Q9Z2H5	E41L1_MOUSE Band 4.1-like protein 1 OS=Mus musculus OX=10090 GN=Epb41l1 PE=1 SV=2
51.88_504.2906n	1	#78966	1	51.8791	504.291	0	TLGSK		O70318	E41L2_MOUSE Band 4.1-like protein 2 OS=Mus musculus OX=10090 GN=Epb41l2 PE=1 SV=2
51.86_764.4360n	1	#30324	2	51.8607	764.436	7.3435	FLTLGSK		O70318	E41L2_MOUSE Band 4.1-like protein 2 OS=Mus musculus OX=10090 GN=Epb41l2 PE=1 SV=2
46.91_892.4975n	1	#93182	1	46.9149	892.498	6.6321	SYNLVVAK		O70318	E41L2_MOUSE Band 4.1-like protein 2 OS=Mus musculus OX=10090 GN=Epb41l2 PE=1 SV=2
38.17_1010.5744n	2	#55135,#59845	2,3	38.1745	1010.57	5.9793	ATPLPAEGKK		O70318	E41L2_MOUSE Band 4.1-like protein 2 OS=Mus musculus OX=10090 GN=Epb41l2 PE=1 SV=2
39.71_1235.6948n	1	#60487	3	39.713	1235.69	7.0328	KHLEVQVEVR		O70318	E41L2_MOUSE Band 4.1-like protein 2 OS=Mus musculus OX=10090 GN=Epb41l2 PE=1 SV=2
40.65_1235.6949n	1	#71438	3	40.651	1235.69	6.4347	KHLEVQVEVR		O70318	E41L2_MOUSE Band 4.1-like protein 2 OS=Mus musculus OX=10090 GN=Epb41l2 PE=1 SV=2
79.31_1262.6611n	1	#96933	2	79.3063	1262.66	5.5947	LGVCANGLLIYK		O70318	E41L2_MOUSE Band 4.1-like protein 2 OS=Mus musculus OX=10090 GN=Epb41l2 PE=1 SV=2
42.58_1645.8517n	1	#93871	3	42.5785	1645.85	6.1999	EVQTSELKAEVASQK		O70318	E41L2_MOUSE Band 4.1-like protein 2 OS=Mus musculus OX=10090 GN=Epb41l2 PE=1 SV=2
52.78_1728.8784n	1	#16780	2	52.7817	1728.88	6.9014	EASTLIDRPAPQFER		O70318	E41L2_MOUSE Band 4.1-like protein 2 OS=Mus musculus OX=10090 GN=Epb41l2 PE=1 SV=2
53.13_1728.8897n	1	#4415	3	53.1303	1728.89	6.9014	EASTLIDRPAPQFER		O70318	E41L2_MOUSE Band 4.1-like protein 2 OS=Mus musculus OX=10090 GN=Epb41l2 PE=1 SV=2
39.28_1871.8294n	1	#171942	2	39.284	1871.83	5.633	EVENEQTPVSEPEEEK		O70318	E41L2_MOUSE Band 4.1-like protein 2 OS=Mus musculus OX=10090 GN=Epb41l2 PE=1 SV=2
82.21_2176.8218n	1	#24120	3	82.2131	2176.82	4.7206	EEQEECDEELEEEPGQGAK		O70318	E41L2_MOUSE Band 4.1-like protein 2 OS=Mus musculus OX=10090 GN=Epb41l2 PE=1 SV=2
41.59_2855.3246n	2	#18213,#3189	3,4	41.5891	2855.32	5.3262	KEPTQADVEDQILGKEESLPEEESR		O70318	E41L2_MOUSE Band 4.1-like protein 2 OS=Mus musculus OX=10090 GN=Epb41l2 PE=1 SV=2
45.53_2876.3302n	1	#15554	3	45.5303	2876.33	6.3075	EVENEQTPVSEPEEEKGSQPGPPVER		O70318	E41L2_MOUSE Band 4.1-like protein 2 OS=Mus musculus OX=10090 GN=Epb41l2 PE=1 SV=2
45.17_2876.3306n	1	#58198	3	45.1697	2876.33	6.5546	EVENEQTPVSEPEEEKGSQPGPPVER		O70318	E41L2_MOUSE Band 4.1-like protein 2 OS=Mus musculus OX=10090 GN=Epb41l2 PE=1 SV=2
51.86_764.4360n	1	#30324	2	51.8607	764.436	7.3435	FLTLGSK		Q9WV92	E41L3_MOUSE Band 4.1-like protein 3 OS=Mus musculus OX=10090 GN=Epb41l3 PE=1 SV=1
54.75_892.5291n	1	#12657	2	54.7488	892.529	6.374	KFLTLGSK		Q9WV92	E41L3_MOUSE Band 4.1-like protein 3 OS=Mus musculus OX=10090 GN=Epb41l3 PE=1 SV=1
65.89_1033.4927n	1	#77887	1	65.8948	1033.49	6.0121	DYFGLTYR		Q9WV92	E41L3_MOUSE Band 4.1-like protein 3 OS=Mus musculus OX=10090 GN=Epb41l3 PE=1 SV=1
32.87_1404.5977n	1	#125989	2	32.8728	1404.6	6.318	DEVDAAESTPTDR		Q9WV92	E41L3_MOUSE Band 4.1-like protein 3 OS=Mus musculus OX=10090 GN=Epb41l3 PE=1 SV=1
34.85_1404.5980n	1	#115756	2	34.8515	1404.6	7.1544	DEVDAAESTPTDR		Q9WV92	E41L3_MOUSE Band 4.1-like protein 3 OS=Mus musculus OX=10090 GN=Epb41l3 PE=1 SV=1
35.55_1404.6025n	1	#91694	2	35.5493	1404.6	6.618	DEVDAAESTPTDR		Q9WV92	E41L3_MOUSE Band 4.1-like protein 3 OS=Mus musculus OX=10090 GN=Epb41l3 PE=1 SV=1
43.64_1533.7317n	1	#79572	2	43.6369	1533.73	6.9681	AQDLDKTQDELMK		Q9WV92	E41L3_MOUSE Band 4.1-like protein 3 OS=Mus musculus OX=10090 GN=Epb41l3 PE=1 SV=1
38.88_1576.7739n	1	#131457	2	38.8779	1576.77	7.5214	EIGDKDRDFAAAAAK		Q9WV92	E41L3_MOUSE Band 4.1-like protein 3 OS=Mus musculus OX=10090 GN=Epb41l3 PE=1 SV=1
39.18_1576.7744n	1	#71403	2	39.1811	1576.77	7.5964	EIGDKDRDFAAAAAK		Q9WV92	E41L3_MOUSE Band 4.1-like protein 3 OS=Mus musculus OX=10090 GN=Epb41l3 PE=1 SV=1
39.16_1576.7856n	1	#3665	3	39.1639	1576.79	7.5964	EIGDKDRDFAAAAAK		Q9WV92	E41L3_MOUSE Band 4.1-like protein 3 OS=Mus musculus OX=10090 GN=Epb41l3 PE=1 SV=1
38.88_1576.7864n	1	#11198	3	38.8779	1576.79	7.5214	EIGDKDRDFAAAAAK		Q9WV92	E41L3_MOUSE Band 4.1-like protein 3 OS=Mus musculus OX=10090 GN=Epb41l3 PE=1 SV=1
57.08_1604.8328n	2	#4374,#3814	2,3	57.0828	1604.83	7.7484	ASALIDRPAPYFER		Q9WV92	E41L3_MOUSE Band 4.1-like protein 3 OS=Mus musculus OX=10090 GN=Epb41l3 PE=1 SV=1
50.41_1644.8417n	1	#28795	3	50.4076	1644.84	6.6306	GISQTNLITTVTPEK	[N-term] Acetyl N-TERM|[4] Deamidation Q|[6] Deamidation N	Q9WV92	E41L3_MOUSE Band 4.1-like protein 3 OS=Mus musculus OX=10090 GN=Epb41l3 PE=1 SV=1
55.02_1728.9586n	2	#6587,#2565	2,3	55.0159	1728.96	7.9179	GISQTNLITTVTPEKK		Q9WV92	E41L3_MOUSE Band 4.1-like protein 3 OS=Mus musculus OX=10090 GN=Epb41l3 PE=1 SV=1
54.11_1774.7900n	1	#30428	2	54.1062	1774.79	5.8393	GMTPAEAEMHFLENAK		Q9WV92	E41L3_MOUSE Band 4.1-like protein 3 OS=Mus musculus OX=10090 GN=Epb41l3 PE=1 SV=1
66.50_1774.8089n	1	#70563	2	66.4952	1774.81	6.6296	GMTPAEAEMHFLENAK		Q9WV92	E41L3_MOUSE Band 4.1-like protein 3 OS=Mus musculus OX=10090 GN=Epb41l3 PE=1 SV=1
39.73_1795.8470n	1	#79886	3	39.7302	1795.85	6.3529	VVVHKETEITPEDGED		Q9WV92	E41L3_MOUSE Band 4.1-like protein 3 OS=Mus musculus OX=10090 GN=Epb41l3 PE=1 SV=1
67.68_1824.8839n	1	#11897	2	67.6828	1824.88	7.778	QEDAPMIEPLVPEETK		Q9WV92	E41L3_MOUSE Band 4.1-like protein 3 OS=Mus musculus OX=10090 GN=Epb41l3 PE=1 SV=1
53.73_1925.9156n	1	#12955	3	53.7301	1925.92	6.9522	QLEYQQFEDDKLSQR		Q9WV92	E41L3_MOUSE Band 4.1-like protein 3 OS=Mus musculus OX=10090 GN=Epb41l3 PE=1 SV=1
57.43_1994.0136n	1	#18657	3	57.4267	1994.01	6.4094	ASALIDRPAPYFERSSSK		Q9WV92	E41L3_MOUSE Band 4.1-like protein 3 OS=Mus musculus OX=10090 GN=Epb41l3 PE=1 SV=1
57.40_1994.0190n	1	#48172	2	57.4037	1994.02	6.4094	ASALIDRPAPYFERSSSK		Q9WV92	E41L3_MOUSE Band 4.1-like protein 3 OS=Mus musculus OX=10090 GN=Epb41l3 PE=1 SV=1
56.90_2048.0290n	2	#69547,#5955	2,3	56.9007	2048.03	7.7734	QQPALEQFPEAAAHSTPVK		Q9WV92	E41L3_MOUSE Band 4.1-like protein 3 OS=Mus musculus OX=10090 GN=Epb41l3 PE=1 SV=1
55.05_2106.0921n	1	#19597	3	55.0506	2106.09	6.5449	IVITGDADIDHDQALAQAIK		Q9WV92	E41L3_MOUSE Band 4.1-like protein 3 OS=Mus musculus OX=10090 GN=Epb41l3 PE=1 SV=1
52.48_2204.1306n	1	#21866	3	52.4818	2204.13	7.6361	QQPALEQFPEAAAHSTPVKR		Q9WV92	E41L3_MOUSE Band 4.1-like protein 3 OS=Mus musculus OX=10090 GN=Epb41l3 PE=1 SV=1
52.48_2204.1369n	1	#10595	4	52.4818	2204.14	7.6361	QQPALEQFPEAAAHSTPVKR		Q9WV92	E41L3_MOUSE Band 4.1-like protein 3 OS=Mus musculus OX=10090 GN=Epb41l3 PE=1 SV=1
53.13_2304.1141n	1	#8108	3	53.1303	2304.11	6.592	TEPVEAEVESTPHPQPLSTEK		Q9WV92	E41L3_MOUSE Band 4.1-like protein 3 OS=Mus musculus OX=10090 GN=Epb41l3 PE=1 SV=1
59.67_2434.2807n	1	#25300	4	59.6656	2434.28	5.5044	IVITGDADIDHDQALAQAIKEAK		Q9WV92	E41L3_MOUSE Band 4.1-like protein 3 OS=Mus musculus OX=10090 GN=Epb41l3 PE=1 SV=1
59.87_2441.1463n	1	#124458	3	59.8729	2441.15	6.5822	QEDAPMIEPLVPEETKQSSGEK		Q9WV92	E41L3_MOUSE Band 4.1-like protein 3 OS=Mus musculus OX=10090 GN=Epb41l3 PE=1 SV=1
60.18_2441.1597n	1	#12328	3	60.1788	2441.16	6.9815	QEDAPMIEPLVPEETKQSSGEK		Q9WV92	E41L3_MOUSE Band 4.1-like protein 3 OS=Mus musculus OX=10090 GN=Epb41l3 PE=1 SV=1
94.74_3000.2679n	1	#201787	4	94.7396	3000.27	5.2116	TDSERTDTAADGETSATESDQEEDAEIK		Q9WV92	E41L3_MOUSE Band 4.1-like protein 3 OS=Mus musculus OX=10090 GN=Epb41l3 PE=1 SV=1
47.77_3080.3815n	1	#71075	3	47.7671	3080.38	7.7221	GEEVDQSAPEQEQPATVSHEEEQASTIR		Q9WV92	E41L3_MOUSE Band 4.1-like protein 3 OS=Mus musculus OX=10090 GN=Epb41l3 PE=1 SV=1
48.05_3080.3815n	1	#14141	3	48.0535	3080.38	7.6815	GEEVDQSAPEQEQPATVSHEEEQASTIR		Q9WV92	E41L3_MOUSE Band 4.1-like protein 3 OS=Mus musculus OX=10090 GN=Epb41l3 PE=1 SV=1
60.18_3308.6603n	1	#36322	5	60.1788	3308.66	6.2704	DSVSAAEVGTGQYATTKGISQTNLITTVTPEK	[N-term] Acetyl N-TERM	Q9WV92	E41L3_MOUSE Band 4.1-like protein 3 OS=Mus musculus OX=10090 GN=Epb41l3 PE=1 SV=1
45.89_3493.6021n	1	#35872	4	45.8909	3493.6	6.9754	EQRGEEVDQSAPEQEQPATVSHEEEQASTIR		Q9WV92	E41L3_MOUSE Band 4.1-like protein 3 OS=Mus musculus OX=10090 GN=Epb41l3 PE=1 SV=1
55.82_3586.8438n	1	#140691	4	55.8209	3586.84	5.4174	IVITGDADIDHDQALAQAIKEAKEQHPDMSVTK		Q9WV92	E41L3_MOUSE Band 4.1-like protein 3 OS=Mus musculus OX=10090 GN=Epb41l3 PE=1 SV=1
44.11_4680.0256n	1	#69007	5	44.1116	4680.03	6.1237	MTTESGSDSESKPDQEAEPQEAAGPQGQAGAQPGPEPAGGNGSLNGEK	[15] Deamidation Q	Q9WV92	E41L3_MOUSE Band 4.1-like protein 3 OS=Mus musculus OX=10090 GN=Epb41l3 PE=1 SV=1
87.65_1643.9393n	1	#171877	2	87.6452	1643.94	5.9452	IVQVTAADAFLDLIR		P56564	EAA1_MOUSE Excitatory amino acid transporter 1 OS=Mus musculus OX=10090 GN=Slc1a3 PE=1 SV=2
49.64_1992.8931n	1	#75724	2	49.6355	1992.89	6.9649	NRDVEMGNSVIEENEMK		P56564	EAA1_MOUSE Excitatory amino acid transporter 1 OS=Mus musculus OX=10090 GN=Slc1a3 PE=1 SV=2
46.28_2499.2464n	2	#10777,#11567	3,4	46.2799	2499.25	7.6285	KPYQLIAQDNEPEKPVADSETK		P56564	EAA1_MOUSE Excitatory amino acid transporter 1 OS=Mus musculus OX=10090 GN=Slc1a3 PE=1 SV=2
45.94_2499.2472n	1	#24193	4	45.9425	2499.25	7.624	KPYQLIAQDNEPEKPVADSETK		P56564	EAA1_MOUSE Excitatory amino acid transporter 1 OS=Mus musculus OX=10090 GN=Slc1a3 PE=1 SV=2
51.02_2630.2887n	2	#7841,#6126	3,4	51.0196	2630.29	7.4052	KPYQLIAQDNEPEKPVADSETKM		P56564	EAA1_MOUSE Excitatory amino acid transporter 1 OS=Mus musculus OX=10090 GN=Slc1a3 PE=1 SV=2
95.08_3202.7605n	1	#53785	3	95.0848	3202.76	6.2154	NPWVFIGGLLQALITALGTSSSSATLPITFK		P56564	EAA1_MOUSE Excitatory amino acid transporter 1 OS=Mus musculus OX=10090 GN=Slc1a3 PE=1 SV=2
76.86_3211.8732n	1	#130746	4	76.864	3211.87	5.5878	AVVYYMTTTIIAVVIGIIIVIIIHPGKGTK	[6] Oxidation M	P56564	EAA1_MOUSE Excitatory amino acid transporter 1 OS=Mus musculus OX=10090 GN=Slc1a3 PE=1 SV=2
63.96_4203.9834n	1	#15158	4	63.9633	4203.98	6.2342	DVEMGNSVIEENEMKKPYQLIAQDNEPEKPVADSETK		P56564	EAA1_MOUSE Excitatory amino acid transporter 1 OS=Mus musculus OX=10090 GN=Slc1a3 PE=1 SV=2
39.42_412.1591n	1	#68444	1	39.4213	412.159	0	ASTE	[N-term] Acetyl N-TERM	P43006	EAA2_MOUSE Excitatory amino acid transporter 2 OS=Mus musculus OX=10090 GN=Slc1a2 PE=1 SV=1
38.05_430.1701n	1	#96284	1	38.0544	430.17	0	ASTE	[N-term] Acetyl N-TERM	P43006	EAA2_MOUSE Excitatory amino acid transporter 2 OS=Mus musculus OX=10090 GN=Slc1a2 PE=1 SV=1
39.42_430.1703n	1	#35106	1	39.4213	430.17	0	ASTE	[N-term] Acetyl N-TERM	P43006	EAA2_MOUSE Excitatory amino acid transporter 2 OS=Mus musculus OX=10090 GN=Slc1a2 PE=1 SV=1
39.42_558.2316n	1	#97598	1	39.4213	558.232	0	ASTEGA	[N-term] Acetyl N-TERM	P43006	EAA2_MOUSE Excitatory amino acid transporter 2 OS=Mus musculus OX=10090 GN=Slc1a2 PE=1 SV=1
39.03_731.3279n	1	#67078	1	39.0266	731.328	0	GANNMPK	[3] Deamidation N	P43006	EAA2_MOUSE Excitatory amino acid transporter 2 OS=Mus musculus OX=10090 GN=Slc1a2 PE=1 SV=1
38.05_917.3548n	1	#40321	1	38.0544	917.355	0	ASTEGANNM	[N-term] Acetyl N-TERM	P43006	EAA2_MOUSE Excitatory amino acid transporter 2 OS=Mus musculus OX=10090 GN=Slc1a2 PE=1 SV=1
42.15_1123.4899n	2	#114560,#3403	1,2	42.1496	1123.49	7.1696	MQEDIEMTK		P43006	EAA2_MOUSE Excitatory amino acid transporter 2 OS=Mus musculus OX=10090 GN=Slc1a2 PE=1 SV=1
38.05_1160.5195n	1	#1103	2	38.0544	1160.52	7.0442	ASTEGANNMPK	[N-term] Acetyl N-TERM	P43006	EAA2_MOUSE Excitatory amino acid transporter 2 OS=Mus musculus OX=10090 GN=Slc1a2 PE=1 SV=1
39.42_1161.5022n	1	#535	2	39.4213	1161.5	6.975	ASTEGANNMPK	[N-term] Acetyl N-TERM|[7] Deamidation N	P43006	EAA2_MOUSE Excitatory amino acid transporter 2 OS=Mus musculus OX=10090 GN=Slc1a2 PE=1 SV=1
29.27_1177.4912n	1	#58402	2	29.2701	1177.49	5.7962	ASTEGANNMPK	[N-term] Acetyl N-TERM|[7] Deamidation N|[9] Oxidation M	P43006	EAA2_MOUSE Excitatory amino acid transporter 2 OS=Mus musculus OX=10090 GN=Slc1a2 PE=1 SV=1
38.86_1299.6061n	1	#39376	2	38.8608	1299.61	7.3503	SELDTIDSQHR		P43006	EAA2_MOUSE Excitatory amino acid transporter 2 OS=Mus musculus OX=10090 GN=Slc1a2 PE=1 SV=1
38.88_1299.6080n	1	#33688	3	38.8779	1299.61	7.3503	SELDTIDSQHR		P43006	EAA2_MOUSE Excitatory amino acid transporter 2 OS=Mus musculus OX=10090 GN=Slc1a2 PE=1 SV=1
76.18_2049.0363n	1	#19300	3	76.1841	2049.04	5.6535	TSVNVVGDSFGAGIVYHLSK		P43006	EAA2_MOUSE Excitatory amino acid transporter 2 OS=Mus musculus OX=10090 GN=Slc1a2 PE=1 SV=1
47.00_913.5578n	2	#82014,#12399	1,2	47.0035	913.558	7.7185	QTVAVGVIK		P10126	EF1A1_MOUSE Elongation factor 1-alpha 1 OS=Mus musculus OX=10090 GN=Eef1a1 PE=1 SV=3
47.34_913.5589n	1	#17558	1	47.3381	913.559	8.3832	QTVAVGVIK		P10126	EF1A1_MOUSE Elongation factor 1-alpha 1 OS=Mus musculus OX=10090 GN=Eef1a1 PE=1 SV=3
47.36_913.5599n	1	#2222	2	47.3553	913.56	8.3832	QTVAVGVIK		P10126	EF1A1_MOUSE Elongation factor 1-alpha 1 OS=Mus musculus OX=10090 GN=Eef1a1 PE=1 SV=3
54.34_974.5172n	2	#49243,#4435	1,2	54.343	974.517	5.4002	LPLQDVYK		P10126	EF1A1_MOUSE Elongation factor 1-alpha 1 OS=Mus musculus OX=10090 GN=Eef1a1 PE=1 SV=3
52.90_1024.6021n	1	#49113	1	52.8982	1024.6	7.706	IGGIGTVPVGR		P10126	EF1A1_MOUSE Elongation factor 1-alpha 1 OS=Mus musculus OX=10090 GN=Eef1a1 PE=1 SV=3
52.90_1024.6040n	1	#1141	2	52.8982	1024.6	7.7373	IGGIGTVPVGR		P10126	EF1A1_MOUSE Elongation factor 1-alpha 1 OS=Mus musculus OX=10090 GN=Eef1a1 PE=1 SV=3
53.52_1315.7259n	1	#134015	3	53.516	1315.73	7.3528	DMRQTVAVGVIK		P10126	EF1A1_MOUSE Elongation factor 1-alpha 1 OS=Mus musculus OX=10090 GN=Eef1a1 PE=1 SV=3
55.05_1844.9997n	1	#26346	3	55.0506	1845	6.4897	EKTHINIVVIGHVDSGK		P10126	EF1A1_MOUSE Elongation factor 1-alpha 1 OS=Mus musculus OX=10090 GN=Eef1a1 PE=1 SV=3
57.05_1906.9832n	1	#34016	4	57.0482	1906.98	4.8904	YYVTIIDAPGHRDFIK		P10126	EF1A1_MOUSE Elongation factor 1-alpha 1 OS=Mus musculus OX=10090 GN=Eef1a1 PE=1 SV=3
78.26_2514.3760n	1	#866	3	78.2627	2514.38	7.6007	VETGVLKPGMVVTFAPVNVTTEVK		P10126	EF1A1_MOUSE Elongation factor 1-alpha 1 OS=Mus musculus OX=10090 GN=Eef1a1 PE=1 SV=3
72.83_3407.6978n	1	#84522	4	72.8311	3407.7	6.1718	NMITGTSQADCAVLIVAAGVGEFEAGISKNGQTR		P10126	EF1A1_MOUSE Elongation factor 1-alpha 1 OS=Mus musculus OX=10090 GN=Eef1a1 PE=1 SV=3
82.73_3520.9644n	1	#1515	4	82.7311	3520.96	5.814	IGGIGTVPVGRVETGVLKPGMVVTFAPVNVTTEVK		P10126	EF1A1_MOUSE Elongation factor 1-alpha 1 OS=Mus musculus OX=10090 GN=Eef1a1 PE=1 SV=3
87.43_3536.9700n	1	#29695	4	87.4281	3536.97	6.0568	IGGIGTVPVGRVETGVLKPGMVVTFAPVNVTTEVK	[21] Oxidation M	P10126	EF1A1_MOUSE Elongation factor 1-alpha 1 OS=Mus musculus OX=10090 GN=Eef1a1 PE=1 SV=3
87.40_3536.9719n	1	#49545	4	87.4036	3536.97	6.0568	IGGIGTVPVGRVETGVLKPGMVVTFAPVNVTTEVK	[21] Oxidation M	P10126	EF1A1_MOUSE Elongation factor 1-alpha 1 OS=Mus musculus OX=10090 GN=Eef1a1 PE=1 SV=3
47.36_415.2792n	1	#26668	1	47.3553	415.279	0	GVIK		P62631	EF1A2_MOUSE Elongation factor 1-alpha 2 OS=Mus musculus OX=10090 GN=Eef1a2 PE=1 SV=1
52.90_684.3916n	1	#43482	1	52.8982	684.392	0	GTVPVGR		P62631	EF1A2_MOUSE Elongation factor 1-alpha 2 OS=Mus musculus OX=10090 GN=Eef1a2 PE=1 SV=1
52.92_911.5145n	1	#108583	1	52.9215	911.514	0	GGIGTVPVGR		P62631	EF1A2_MOUSE Elongation factor 1-alpha 2 OS=Mus musculus OX=10090 GN=Eef1a2 PE=1 SV=1
47.00_913.5578n	2	#82014,#12399	1,2	47.0035	913.558	7.7185	QTVAVGVIK		P62631	EF1A2_MOUSE Elongation factor 1-alpha 2 OS=Mus musculus OX=10090 GN=Eef1a2 PE=1 SV=1
47.34_913.5589n	1	#17558	1	47.3381	913.559	8.3832	QTVAVGVIK		P62631	EF1A2_MOUSE Elongation factor 1-alpha 2 OS=Mus musculus OX=10090 GN=Eef1a2 PE=1 SV=1
47.36_913.5599n	1	#2222	2	47.3553	913.56	8.3832	QTVAVGVIK		P62631	EF1A2_MOUSE Elongation factor 1-alpha 2 OS=Mus musculus OX=10090 GN=Eef1a2 PE=1 SV=1
54.34_974.5172n	2	#49243,#4435	1,2	54.343	974.517	5.4002	LPLQDVYK		P62631	EF1A2_MOUSE Elongation factor 1-alpha 2 OS=Mus musculus OX=10090 GN=Eef1a2 PE=1 SV=1
52.90_1024.6021n	1	#49113	1	52.8982	1024.6	7.706	IGGIGTVPVGR		P62631	EF1A2_MOUSE Elongation factor 1-alpha 2 OS=Mus musculus OX=10090 GN=Eef1a2 PE=1 SV=1
52.90_1024.6040n	1	#1141	2	52.8982	1024.6	7.7373	IGGIGTVPVGR		P62631	EF1A2_MOUSE Elongation factor 1-alpha 2 OS=Mus musculus OX=10090 GN=Eef1a2 PE=1 SV=1
53.52_1315.7259n	1	#134015	3	53.516	1315.73	7.3528	DMRQTVAVGVIK		P62631	EF1A2_MOUSE Elongation factor 1-alpha 2 OS=Mus musculus OX=10090 GN=Eef1a2 PE=1 SV=1
49.90_1383.7999n	2	#73784,#43491	2,3	49.9029	1383.8	7.1619	QTVAVGVIKNVEK		P62631	EF1A2_MOUSE Elongation factor 1-alpha 2 OS=Mus musculus OX=10090 GN=Eef1a2 PE=1 SV=1
80.25_1750.9377n	1	#18192	2	80.2516	1750.94	5.9974	GITIDISLWKFETTK		P62631	EF1A2_MOUSE Elongation factor 1-alpha 2 OS=Mus musculus OX=10090 GN=Eef1a2 PE=1 SV=1
80.28_1750.9598n	1	#76173	2	80.2753	1750.96	5.9974	GITIDISLWKFETTK		P62631	EF1A2_MOUSE Elongation factor 1-alpha 2 OS=Mus musculus OX=10090 GN=Eef1a2 PE=1 SV=1
55.05_1844.9997n	1	#26346	3	55.0506	1845	6.4897	EKTHINIVVIGHVDSGK		P62631	EF1A2_MOUSE Elongation factor 1-alpha 2 OS=Mus musculus OX=10090 GN=Eef1a2 PE=1 SV=1
84.07_2570.4015n	1	#7596	3	84.0733	2570.4	6.9821	VETGILRPGMVVTFAPVNITTEVK		P62631	EF1A2_MOUSE Elongation factor 1-alpha 2 OS=Mus musculus OX=10090 GN=Eef1a2 PE=1 SV=1
80.97_2964.4212n	1	#15999	3	80.9697	2964.42	6.4219	SGDAAIVEMVPGKPMCVESFSQYPPLGR		P62631	EF1A2_MOUSE Elongation factor 1-alpha 2 OS=Mus musculus OX=10090 GN=Eef1a2 PE=1 SV=1
72.83_3407.6978n	1	#84522	4	72.8311	3407.7	6.1718	NMITGTSQADCAVLIVAAGVGEFEAGISKNGQTR		P62631	EF1A2_MOUSE Elongation factor 1-alpha 2 OS=Mus musculus OX=10090 GN=Eef1a2 PE=1 SV=1
87.62_3576.9894n	1	#6544	4	87.6209	3576.99	6.4758	IGGIGTVPVGRVETGILRPGMVVTFAPVNITTEVK		P62631	EF1A2_MOUSE Elongation factor 1-alpha 2 OS=Mus musculus OX=10090 GN=Eef1a2 PE=1 SV=1
79.06_3619.9944n	1	#18556	5	79.062	3619.99	5.8836	IGGIGTVPVGRVETGILRPGMVVTFAPVNITTEVK	[N-term] Acetyl N-TERM|[29] Deamidation N	P62631	EF1A2_MOUSE Elongation factor 1-alpha 2 OS=Mus musculus OX=10090 GN=Eef1a2 PE=1 SV=1
54.98_1184.6045n	1	#5167	2	54.9809	1184.6	6.6516	AEAGDNLGALVR		Q8BFR5	EFTU_MOUSE Elongation factor Tu_ mitochondrial OS=Mus musculus OX=10090 GN=Tufm PE=1 SV=1
57.84_1260.6507n	2	#11840,#37264	2,3	57.8379	1260.65	6.9545	TVVTGIEMFHK		Q8BFR5	EFTU_MOUSE Elongation factor Tu_ mitochondrial OS=Mus musculus OX=10090 GN=Tufm PE=1 SV=1
39.10_1363.5916n	1	#88619	2	39.0953	1363.59	6.8837	YEEIDNAPEER		Q8BFR5	EFTU_MOUSE Elongation factor Tu_ mitochondrial OS=Mus musculus OX=10090 GN=Tufm PE=1 SV=1
52.27_1672.8531n	1	#44730	2	52.2738	1672.85	6.4111	GITINAAHVEYSTAAR		Q8BFR5	EFTU_MOUSE Elongation factor Tu_ mitochondrial OS=Mus musculus OX=10090 GN=Tufm PE=1 SV=1
37.38_1808.9236n	2	#46345,#214485	4,5	37.3823	1808.92	6.7833	DKPHVNVGTIGHVDHGK		Q8BFR5	EFTU_MOUSE Elongation factor Tu_ mitochondrial OS=Mus musculus OX=10090 GN=Tufm PE=1 SV=1
82.71_2144.1423n	1	#39666	3	82.7079	2144.14	5.4596	DLDKPFLLPVESVYSIPGR		Q8BFR5	EFTU_MOUSE Elongation factor Tu_ mitochondrial OS=Mus musculus OX=10090 GN=Tufm PE=1 SV=1
49.29_2709.4567n	1	#7959	5	49.2887	2709.46	5.9399	DKPHVNVGTIGHVDHGKTTLTAAITK		Q8BFR5	EFTU_MOUSE Elongation factor Tu_ mitochondrial OS=Mus musculus OX=10090 GN=Tufm PE=1 SV=1
70.39_3200.6400n	2	#6205,#6559	4,5	70.385	3200.64	6.2574	AMLSGPGQFAENETNEVNFREIPSHVLSK		P83940	ELOC_MOUSE Elongin-C OS=Mus musculus OX=10090 GN=Eloc PE=1 SV=1
53.92_799.3784n	1	#191288	2	53.9193	799.378	6.3645	YDLDFK		P17182	ENOA_MOUSE Alpha-enolase OS=Mus musculus OX=10090 GN=Eno1 PE=1 SV=3
48.29_898.5439n	1	#12828	2	48.2937	898.544	6.982	TIAPALVSK		P17182	ENOA_MOUSE Alpha-enolase OS=Mus musculus OX=10090 GN=Eno1 PE=1 SV=3
48.23_898.5462n	1	#44544	1	48.225	898.546	7.1689	TIAPALVSK		P17182	ENOA_MOUSE Alpha-enolase OS=Mus musculus OX=10090 GN=Eno1 PE=1 SV=3
43.95_931.5242n	1	#6129	2	43.9457	931.524	6.7052	SFRNPLAK		P17182	ENOA_MOUSE Alpha-enolase OS=Mus musculus OX=10090 GN=Eno1 PE=1 SV=3
46.07_1071.5266n	1	#185325	3	46.074	1071.53	5.2685	SGKYDLDFK		P17182	ENOA_MOUSE Alpha-enolase OS=Mus musculus OX=10090 GN=Eno1 PE=1 SV=3
35.91_1180.6164n	1	#148224	2	35.9096	1180.62	7.1554	GVSQAVEHINK		P17182	ENOA_MOUSE Alpha-enolase OS=Mus musculus OX=10090 GN=Eno1 PE=1 SV=3
73.47_1438.7382n	1	#14159	2	73.4749	1438.74	5.8292	YITPDQLADLYK		P17182	ENOA_MOUSE Alpha-enolase OS=Mus musculus OX=10090 GN=Eno1 PE=1 SV=3
52.90_1540.7570n	1	#66839	3	52.8982	1540.76	6.582	LAQSNGWGVMVSHR		P17182	ENOA_MOUSE Alpha-enolase OS=Mus musculus OX=10090 GN=Eno1 PE=1 SV=3
52.76_1540.7635n	1	#52554	2	52.7582	1540.76	6.72	LAQSNGWGVMVSHR		P17182	ENOA_MOUSE Alpha-enolase OS=Mus musculus OX=10090 GN=Eno1 PE=1 SV=3
45.11_1643.8424n	3	#39673,#1784,#25391	2,3,4	45.1125	1643.84	7.43	FMGKGVSQAVEHINK		P17182	ENOA_MOUSE Alpha-enolase OS=Mus musculus OX=10090 GN=Eno1 PE=1 SV=3
58.98_2061.1456n	1	#46002	4	58.9751	2061.15	7.8063	GVSQAVEHINKTIAPALVSK		P17182	ENOA_MOUSE Alpha-enolase OS=Mus musculus OX=10090 GN=Eno1 PE=1 SV=3
59.57_2061.1566n	2	#16922,#2423	2,3	59.5734	2061.16	7.6542	GVSQAVEHINKTIAPALVSK		P17182	ENOA_MOUSE Alpha-enolase OS=Mus musculus OX=10090 GN=Eno1 PE=1 SV=3
84.30_2295.1573n	1	#144800	3	84.301	2295.16	5.5876	SGETEDTFIADLVVGLCTGQIK		P17182	ENOA_MOUSE Alpha-enolase OS=Mus musculus OX=10090 GN=Eno1 PE=1 SV=3
53.92_799.3784n	1	#191288	2	53.9193	799.378	6.3645	YDLDFK		P21550	ENOB_MOUSE Beta-enolase OS=Mus musculus OX=10090 GN=Eno3 PE=1 SV=3
56.88_2093.0636n	2	#48779,#18705	3,4	56.8781	2093.06	5.7645	EILDSRGNPTVEVDLHTAK		P21550	ENOB_MOUSE Beta-enolase OS=Mus musculus OX=10090 GN=Eno3 PE=1 SV=3
84.30_2295.1573n	1	#144800	3	84.301	2295.16	5.5876	SGETEDTFIADLVVGLCTGQIK		P21550	ENOB_MOUSE Beta-enolase OS=Mus musculus OX=10090 GN=Eno3 PE=1 SV=3
53.92_799.3784n	1	#191288	2	53.9193	799.378	6.3645	YDLDFK		P17183	ENOG_MOUSE Gamma-enolase OS=Mus musculus OX=10090 GN=Eno2 PE=1 SV=2
39.40_1159.5385n	1	#13258	2	39.4042	1159.54	7.0909	IEEELGDEAR		P17183	ENOG_MOUSE Gamma-enolase OS=Mus musculus OX=10090 GN=Eno2 PE=1 SV=2
39.80_1159.5387n	1	#2048	2	39.7988	1159.54	7.2812	IEEELGDEAR		P17183	ENOG_MOUSE Gamma-enolase OS=Mus musculus OX=10090 GN=Eno2 PE=1 SV=2
51.27_1357.6910n	1	#9974	3	51.2696	1357.69	7.3337	FAGHNFRNPSVL		P17183	ENOG_MOUSE Gamma-enolase OS=Mus musculus OX=10090 GN=Eno2 PE=1 SV=2
51.23_1357.7017n	1	#976	2	51.2331	1357.7	7.3337	FAGHNFRNPSVL		P17183	ENOG_MOUSE Gamma-enolase OS=Mus musculus OX=10090 GN=Eno2 PE=1 SV=2
84.30_2295.1573n	1	#144800	3	84.301	2295.16	5.5876	SGETEDTFIADLVVGLCTGQIK		P17183	ENOG_MOUSE Gamma-enolase OS=Mus musculus OX=10090 GN=Eno2 PE=1 SV=2
63.65_2632.4272n	1	#22905	3	63.6541	2632.43	5.7507	AVDHINSRIAPALISSGISVVEQEK		P17183	ENOG_MOUSE Gamma-enolase OS=Mus musculus OX=10090 GN=Eno2 PE=1 SV=2
49.49_1309.5285n	1	#11386	2	49.495	1309.53	7.6831	YFDSGDYNMAK		P60840	ENSA_MOUSE Alpha-endosulfine OS=Mus musculus OX=10090 GN=Ensa PE=1 SV=1
46.13_1622.7050n	1	#81911	2	46.1255	1622.71	7.1349	GQKYFDSGDYNMAK		P60840	ENSA_MOUSE Alpha-endosulfine OS=Mus musculus OX=10090 GN=Ensa PE=1 SV=1
59.24_1723.8592n	3	#940,#525,#10473	2,3,4	59.2405	1723.86	7.2302	YPSLGQKPGGSDFLMK		P60840	ENSA_MOUSE Alpha-endosulfine OS=Mus musculus OX=10090 GN=Ensa PE=1 SV=1
50.63_1879.9514n	1	#163770	3	50.629	1879.95	6.0712	YPSLGQKPGGSDFLMKR		P60840	ENSA_MOUSE Alpha-endosulfine OS=Mus musculus OX=10090 GN=Ensa PE=1 SV=1
59.87_2767.4008n	1	#93753	3	59.8729	2767.4	7.0378	QLPSAGADKNLVTGDHIPTPQDLPQR		P60840	ENSA_MOUSE Alpha-endosulfine OS=Mus musculus OX=10090 GN=Ensa PE=1 SV=1
42.49_1727.7904n	1	#38256	2	42.4927	1727.79	7.215	NSDPWAASQQPASNAGK		Q8CHU3	EPN2_MOUSE Epsin-2 OS=Mus musculus OX=10090 GN=Epn2 PE=1 SV=1
45.75_1960.8666n	1	#94348	2	45.7535	1960.87	7.7073	GSSQPNLSTSYSEQEYGK		Q8CHU3	EPN2_MOUSE Epsin-2 OS=Mus musculus OX=10090 GN=Epn2 PE=1 SV=1
55.47_2383.1658n	1	#38116	3	55.4682	2383.17	6.4824	TTSPDLFESQSLTSASSKPSSAR		Q8CHU3	EPN2_MOUSE Epsin-2 OS=Mus musculus OX=10090 GN=Epn2 PE=1 SV=1
56.68_2383.1889n	1	#23367	4	56.6801	2383.19	5.6156	TTSPDLFESQSLTSASSKPSSAR		Q8CHU3	EPN2_MOUSE Epsin-2 OS=Mus musculus OX=10090 GN=Epn2 PE=1 SV=1
76.27_3452.7413n	1	#66604	4	76.2747	3452.74	5.8311	ENIFAIQTLKDFQYIDRDGKDQGINVREK		Q8CHU3	EPN2_MOUSE Epsin-2 OS=Mus musculus OX=10090 GN=Epn2 PE=1 SV=1
71.73_4138.1734n	1	#50178	5	71.7322	4138.17	4.9104	VAQQCRENIFAIQTLKDFQYIDRDGKDQGINVREK		Q8CHU3	EPN2_MOUSE Epsin-2 OS=Mus musculus OX=10090 GN=Epn2 PE=1 SV=1
44.69_1522.7285n	1	#65434	2	44.6949	1522.73	5.972	NSYSRYNTISYR		Q5EBJ4	ERMIN_MOUSE Ermin OS=Mus musculus OX=10090 GN=Ermn PE=1 SV=1
38.60_1661.7088n	1	#75919	2	38.6034	1661.71	6.6793	QETTDADETQAYYK		Q5EBJ4	ERMIN_MOUSE Ermin OS=Mus musculus OX=10090 GN=Ermn PE=1 SV=1
38.96_1661.7105n	1	#37703	2	38.9637	1661.71	5.7576	QETTDADETQAYYK		Q5EBJ4	ERMIN_MOUSE Ermin OS=Mus musculus OX=10090 GN=Ermn PE=1 SV=1
74.41_1680.8076n	1	#23666	2	74.4099	1680.81	6.3681	GDASTTEIEWLGFQK		Q5EBJ4	ERMIN_MOUSE Ermin OS=Mus musculus OX=10090 GN=Ermn PE=1 SV=1
74.36_1680.8176n	1	#28750	2	74.3616	1680.82	6.0224	GDASTTEIEWLGFQK		Q5EBJ4	ERMIN_MOUSE Ermin OS=Mus musculus OX=10090 GN=Ermn PE=1 SV=1
53.49_2150.0906n	1	#9550	3	53.4923	2150.09	5.8475	ILNENPEENLFVVHQAIK	[N-term] Acetyl N-TERM|[9] Deamidation N|[15] Deamidation Q	Q5EBJ4	ERMIN_MOUSE Ermin OS=Mus musculus OX=10090 GN=Ermn PE=1 SV=1
69.54_2763.3366n	1	#15193	3	69.5351	2763.34	6.331	TAQQQLEQRGDASTTEIEWLGFQK		Q5EBJ4	ERMIN_MOUSE Ermin OS=Mus musculus OX=10090 GN=Ermn PE=1 SV=1
59.95_1104.5255n	2	#36148,#14795	1,2	59.9492	1104.53	6.1752	KFYEFSQR	[7] Deamidation Q	Q921M7	FA49B_MOUSE Protein FAM49B OS=Mus musculus OX=10090 GN=Fam49b PE=1 SV=1
60.01_1104.5263n	2	#34294,#2877	1,2	60.0061	1104.53	6.1752	KFYEFSQR	[7] Deamidation Q	Q921M7	FA49B_MOUSE Protein FAM49B OS=Mus musculus OX=10090 GN=Fam49b PE=1 SV=1
41.14_1539.7728n	2	#80722,#21400	2,3	41.1429	1539.77	6.3156	TLSDATTKFVSENK		Q921M7	FA49B_MOUSE Protein FAM49B OS=Mus musculus OX=10090 GN=Fam49b PE=1 SV=1
53.06_2094.9962n	1	#33355	2	53.0614	2095	7.5501	INNVPAEGENEVNNELANR		Q921M7	FA49B_MOUSE Protein FAM49B OS=Mus musculus OX=10090 GN=Fam49b PE=1 SV=1
79.04_3071.3946n	1	#41146	4	79.0378	3071.39	5.4784	VLTCTDLEQGPNFFLDFENAQPTESEK		Q921M7	FA49B_MOUSE Protein FAM49B OS=Mus musculus OX=10090 GN=Fam49b PE=1 SV=1
40.53_988.5094n	1	#77996	2	40.5309	988.509	5.3757	LTITQDGNK		P55050	FABPI_MOUSE Fatty acid-binding protein_ intestinal OS=Mus musculus OX=10090 GN=Fabp2 PE=1 SV=2
52.56_1184.6310n	1	#12281	2	52.5587	1184.63	5.7702	QVLNQIDKVK	[5] Deamidation Q	P29699	FETUA_MOUSE Alpha-2-HS-glycoprotein OS=Mus musculus OX=10090 GN=Ahsg PE=1 SV=1
52.62_1184.6777n	1	#34048	2	52.6215	1184.68	5.7702	QVLNQIDKVK	[5] Deamidation Q	P29699	FETUA_MOUSE Alpha-2-HS-glycoprotein OS=Mus musculus OX=10090 GN=Ahsg PE=1 SV=1
54.01_1529.7472n	1	#95088	2	54.0131	1529.75	5.4224	EVTDPAKCNLLAEK		P29699	FETUA_MOUSE Alpha-2-HS-glycoprotein OS=Mus musculus OX=10090 GN=Ahsg PE=1 SV=1
38.09_2039.9048n	1	#65698	3	38.0887	2039.9	6.0725	VMHTQCHSTPDSAEDVRK		P29699	FETUA_MOUSE Alpha-2-HS-glycoprotein OS=Mus musculus OX=10090 GN=Ahsg PE=1 SV=1
54.77_2137.0286n	1	#138790	2	54.7721	2137.03	6.9614	HAFSPVASVESASGETLHSPK		P29699	FETUA_MOUSE Alpha-2-HS-glycoprotein OS=Mus musculus OX=10090 GN=Ahsg PE=1 SV=1
54.86_2137.0496n	1	#5740	3	54.8646	2137.05	6.9614	HAFSPVASVESASGETLHSPK		P29699	FETUA_MOUSE Alpha-2-HS-glycoprotein OS=Mus musculus OX=10090 GN=Ahsg PE=1 SV=1
55.19_4207.0392n	1	#12835	5	55.1899	4207.04	5.5353	VWSRRPFGVVYEMEVDTLETTCHALDPTPLANCSVR	[N-term] Acetyl N-TERM|[13] Oxidation M|[22] Carboxymethyl C	P29699	FETUA_MOUSE Alpha-2-HS-glycoprotein OS=Mus musculus OX=10090 GN=Ahsg PE=1 SV=1
45.91_1313.6623n	1	#7044	2	45.9081	1313.66	7.5172	GVQVETISPGDGR		P26883	FKB1A_MOUSE Peptidyl-prolyl cis-trans isomerase FKBP1A OS=Mus musculus OX=10090 GN=Fkbp1a PE=1 SV=2
55.07_1532.7122n	1	#147592	3	55.0735	1532.71	6.3982	GWEEGVAQMSVGQR		P26883	FKB1A_MOUSE Peptidyl-prolyl cis-trans isomerase FKBP1A OS=Mus musculus OX=10090 GN=Fkbp1a PE=1 SV=2
45.55_1301.6732n	1	#27110	2	45.5475	1301.67	6.5915	SVSLTGAPESVQK		Q3U0V1	FUBP2_MOUSE Far upstream element-binding protein 2 OS=Mus musculus OX=10090 GN=Khsrp PE=1 SV=2
60.57_2180.0381n	1	#36179	2	60.5722	2180.04	5.6501	IGGDAATTVNNNTPDFGFGGQK		Q3U0V1	FUBP2_MOUSE Far upstream element-binding protein 2 OS=Mus musculus OX=10090 GN=Khsrp PE=1 SV=2
56.18_2336.1159n	1	#10004	3	56.1752	2336.12	6.6523	IGGDAATTVNNNTPDFGFGGQKR		Q3U0V1	FUBP2_MOUSE Far upstream element-binding protein 2 OS=Mus musculus OX=10090 GN=Khsrp PE=1 SV=2
55.86_2336.1169n	1	#64430	3	55.8619	2336.12	6.7295	IGGDAATTVNNNTPDFGFGGQKR		Q3U0V1	FUBP2_MOUSE Far upstream element-binding protein 2 OS=Mus musculus OX=10090 GN=Khsrp PE=1 SV=2
37.46_2454.1719n	1	#57966	3	37.4595	2454.17	6.7658	GGGGPGGGGPGGGGASGGPSQPPGGGGPGIRK		Q3U0V1	FUBP2_MOUSE Far upstream element-binding protein 2 OS=Mus musculus OX=10090 GN=Khsrp PE=1 SV=2
58.52_3244.4408n	2	#33735,#7093	3,4	58.5175	3244.44	5.7688	SDYNTGGPPPGPPPPAGGGGGAAGAGGGPPPGPPGAGDR		Q3U0V1	FUBP2_MOUSE Far upstream element-binding protein 2 OS=Mus musculus OX=10090 GN=Khsrp PE=1 SV=2
49.55_442.2178n	1	#59195	1	49.5469	442.218	0	PGGGGV		P59648	FXYD7_MOUSE FXYD domain-containing ion transport regulator 7 OS=Mus musculus OX=10090 GN=Fxyd7 PE=3 SV=1
49.56_671.3128n	1	#98583	1	49.5644	671.313	0	SELPSSA		P59648	FXYD7_MOUSE FXYD domain-containing ion transport regulator 7 OS=Mus musculus OX=10090 GN=Fxyd7 PE=3 SV=1
48.83_1113.5291n	1	#56215	1	48.8285	1113.53	7.5555	SELPSSAPGGGGV		P59648	FXYD7_MOUSE FXYD domain-containing ion transport regulator 7 OS=Mus musculus OX=10090 GN=Fxyd7 PE=3 SV=1
49.43_1113.5299n	1	#7839	1	49.4263	1113.53	7.6995	SELPSSAPGGGGV		P59648	FXYD7_MOUSE FXYD domain-containing ion transport regulator 7 OS=Mus musculus OX=10090 GN=Fxyd7 PE=3 SV=1
49.58_1113.5682n	1	#206484	2	49.5821	1113.57	7.4296	SELPSSAPGGGGV		P59648	FXYD7_MOUSE FXYD domain-containing ion transport regulator 7 OS=Mus musculus OX=10090 GN=Fxyd7 PE=3 SV=1
47.08_537.2553n	1	#86367	1	47.0807	537.255	0	GAAQNI		P16858	G3P_MOUSE Glyceraldehyde-3-phosphate dehydrogenase OS=Mus musculus OX=10090 GN=Gapdh PE=1 SV=2
47.10_554.2819n	1	#27186	1	47.0979	554.282	0	GAAQNI		P16858	G3P_MOUSE Glyceraldehyde-3-phosphate dehydrogenase OS=Mus musculus OX=10090 GN=Gapdh PE=1 SV=2
47.08_554.2820n	1	#9580	1	47.0807	554.282	0	GAAQNI		P16858	G3P_MOUSE Glyceraldehyde-3-phosphate dehydrogenase OS=Mus musculus OX=10090 GN=Gapdh PE=1 SV=2
47.13_554.2850n	1	#22259	1	47.1322	554.285	0	GAAQNI		P16858	G3P_MOUSE Glyceraldehyde-3-phosphate dehydrogenase OS=Mus musculus OX=10090 GN=Gapdh PE=1 SV=2
48.78_794.4101n	1	#24381	2	48.7769	794.41	7.6939	LTGMAFR		P16858	G3P_MOUSE Glyceraldehyde-3-phosphate dehydrogenase OS=Mus musculus OX=10090 GN=Gapdh PE=1 SV=2
48.47_794.4107n	1	#120451	2	48.4653	794.411	7.6454	LTGMAFR		P16858	G3P_MOUSE Glyceraldehyde-3-phosphate dehydrogenase OS=Mus musculus OX=10090 GN=Gapdh PE=1 SV=2
44.04_804.4188n	1	#86655	1	44.0429	804.419	7.1709	VGVNGFGR		P16858	G3P_MOUSE Glyceraldehyde-3-phosphate dehydrogenase OS=Mus musculus OX=10090 GN=Gapdh PE=1 SV=2
43.95_804.4214n	1	#20574	1	43.9457	804.421	7.2975	VGVNGFGR		P16858	G3P_MOUSE Glyceraldehyde-3-phosphate dehydrogenase OS=Mus musculus OX=10090 GN=Gapdh PE=1 SV=2
44.04_804.4219n	1	#85932	2	44.0429	804.422	7.2975	VGVNGFGR		P16858	G3P_MOUSE Glyceraldehyde-3-phosphate dehydrogenase OS=Mus musculus OX=10090 GN=Gapdh PE=1 SV=2
57.43_805.4088n	2	#51182,#28250	1,2	57.4267	805.409	6.6931	VGVNGFGR	[4] Deamidation N	P16858	G3P_MOUSE Glyceraldehyde-3-phosphate dehydrogenase OS=Mus musculus OX=10090 GN=Gapdh PE=1 SV=2
45.63_868.4954n	1	#13060	2	45.6333	868.495	8.2276	VIPELNGK		P16858	G3P_MOUSE Glyceraldehyde-3-phosphate dehydrogenase OS=Mus musculus OX=10090 GN=Gapdh PE=1 SV=2
46.35_868.4967n	1	#196349	1	46.3486	868.497	6.9575	VIPELNGK		P16858	G3P_MOUSE Glyceraldehyde-3-phosphate dehydrogenase OS=Mus musculus OX=10090 GN=Gapdh PE=1 SV=2
45.24_868.4986n	1	#38181	2	45.2385	868.499	8.2569	VIPELNGK		P16858	G3P_MOUSE Glyceraldehyde-3-phosphate dehydrogenase OS=Mus musculus OX=10090 GN=Gapdh PE=1 SV=2
45.19_868.5002n	1	#46660	1	45.1869	868.5	8.2569	VIPELNGK		P16858	G3P_MOUSE Glyceraldehyde-3-phosphate dehydrogenase OS=Mus musculus OX=10090 GN=Gapdh PE=1 SV=2
45.56_868.5012n	1	#11415	1	45.5647	868.501	8.2276	VIPELNGK		P16858	G3P_MOUSE Glyceraldehyde-3-phosphate dehydrogenase OS=Mus musculus OX=10090 GN=Gapdh PE=1 SV=2
45.68_882.4290n	1	#22307	1	45.6848	882.429	0	DGRGAAQNI		P16858	G3P_MOUSE Glyceraldehyde-3-phosphate dehydrogenase OS=Mus musculus OX=10090 GN=Gapdh PE=1 SV=2
45.68_882.4316n	2	#15744,#2143	1,2	45.6848	882.432	0	DGRGAAQNI		P16858	G3P_MOUSE Glyceraldehyde-3-phosphate dehydrogenase OS=Mus musculus OX=10090 GN=Gapdh PE=1 SV=2
46.50_1214.6394n	1	#26440	3	46.503	1214.64	7.6374	TVDGPSGKLWR		P16858	G3P_MOUSE Glyceraldehyde-3-phosphate dehydrogenase OS=Mus musculus OX=10090 GN=Gapdh PE=1 SV=2
45.77_1214.6409n	2	#729,#1952	2,3	45.7706	1214.64	7.5584	TVDGPSGKLWR		P16858	G3P_MOUSE Glyceraldehyde-3-phosphate dehydrogenase OS=Mus musculus OX=10090 GN=Gapdh PE=1 SV=2
45.31_1214.6416n	2	#2640,#5142	2,3	45.3073	1214.64	8.0881	TVDGPSGKLWR		P16858	G3P_MOUSE Glyceraldehyde-3-phosphate dehydrogenase OS=Mus musculus OX=10090 GN=Gapdh PE=1 SV=2
48.67_1223.7212n	2	#10239,#45683	2,3	48.672	1223.72	8.1001	AVGKVIPELNGK		P16858	G3P_MOUSE Glyceraldehyde-3-phosphate dehydrogenase OS=Mus musculus OX=10090 GN=Gapdh PE=1 SV=2
48.33_1223.7246n	1	#99302	3	48.328	1223.72	7.8747	AVGKVIPELNGK		P16858	G3P_MOUSE Glyceraldehyde-3-phosphate dehydrogenase OS=Mus musculus OX=10090 GN=Gapdh PE=1 SV=2
48.31_1223.7256n	1	#25850	2	48.3109	1223.73	7.8747	AVGKVIPELNGK		P16858	G3P_MOUSE Glyceraldehyde-3-phosphate dehydrogenase OS=Mus musculus OX=10090 GN=Gapdh PE=1 SV=2
51.25_1226.5972n	1	#2861	2	51.2511	1226.6	6.4854	VVDLMAYMASK		P16858	G3P_MOUSE Glyceraldehyde-3-phosphate dehydrogenase OS=Mus musculus OX=10090 GN=Gapdh PE=1 SV=2
51.25_1226.6090n	1	#16193	2	51.2511	1226.61	6.4854	VVDLMAYMASK		P16858	G3P_MOUSE Glyceraldehyde-3-phosphate dehydrogenase OS=Mus musculus OX=10090 GN=Gapdh PE=1 SV=2
42.70_1318.7300n	2	#59633,#66725	2,3	42.6986	1318.73	6.3242	LEKPAKYDDIK		P16858	G3P_MOUSE Glyceraldehyde-3-phosphate dehydrogenase OS=Mus musculus OX=10090 GN=Gapdh PE=1 SV=2
46.69_1368.7582n	1	#754	2	46.6917	1368.76	7.294	GAAQNIIPASTGAAK		P16858	G3P_MOUSE Glyceraldehyde-3-phosphate dehydrogenase OS=Mus musculus OX=10090 GN=Gapdh PE=1 SV=2
67.48_1626.9283n	1	#103727	2	67.4771	1626.93	6.8436	LVINGKPITIFQER		P16858	G3P_MOUSE Glyceraldehyde-3-phosphate dehydrogenase OS=Mus musculus OX=10090 GN=Gapdh PE=1 SV=2
68.52_1644.8929n	1	#47482	2	68.5202	1644.89	7.573	VIPELNGKLTGMAFR		P16858	G3P_MOUSE Glyceraldehyde-3-phosphate dehydrogenase OS=Mus musculus OX=10090 GN=Gapdh PE=1 SV=2
69.22_1644.8955n	1	#3405	2	69.2166	1644.9	7.8748	VIPELNGKLTGMAFR		P16858	G3P_MOUSE Glyceraldehyde-3-phosphate dehydrogenase OS=Mus musculus OX=10090 GN=Gapdh PE=1 SV=2
69.25_1644.8980n	1	#8055	3	69.2505	1644.9	7.8748	VIPELNGKLTGMAFR		P16858	G3P_MOUSE Glyceraldehyde-3-phosphate dehydrogenase OS=Mus musculus OX=10090 GN=Gapdh PE=1 SV=2
68.56_1644.9042n	1	#52051	3	68.5634	1644.9	7.573	VIPELNGKLTGMAFR		P16858	G3P_MOUSE Glyceraldehyde-3-phosphate dehydrogenase OS=Mus musculus OX=10090 GN=Gapdh PE=1 SV=2
45.68_1696.8882n	2	#365,#1072	2,3	45.6762	1696.89	8.4713	DGRGAAQNIIPASTGAAK		P16858	G3P_MOUSE Glyceraldehyde-3-phosphate dehydrogenase OS=Mus musculus OX=10090 GN=Gapdh PE=1 SV=2
45.26_1696.8883n	2	#2443,#4773	2,3	45.2557	1696.89	8.0482	DGRGAAQNIIPASTGAAK		P16858	G3P_MOUSE Glyceraldehyde-3-phosphate dehydrogenase OS=Mus musculus OX=10090 GN=Gapdh PE=1 SV=2
61.19_1704.8516n	1	#20941	2	61.1866	1704.85	7.1802	IVSNASCTTNCLAPLAK		P16858	G3P_MOUSE Glyceraldehyde-3-phosphate dehydrogenase OS=Mus musculus OX=10090 GN=Gapdh PE=1 SV=2
49.54_1723.9543n	2	#51283,#5756	2,3	49.5383	1723.95	8.0657	GAAQNIIPASTGAAKAVGK		P16858	G3P_MOUSE Glyceraldehyde-3-phosphate dehydrogenase OS=Mus musculus OX=10090 GN=Gapdh PE=1 SV=2
64.91_1778.7877n	1	#22719	2	64.9074	1778.79	7.9288	LISWYDNEYGYSNR		P16858	G3P_MOUSE Glyceraldehyde-3-phosphate dehydrogenase OS=Mus musculus OX=10090 GN=Gapdh PE=1 SV=2
73.76_2212.1028n	2	#14076,#1319	2,3	73.764	2212.1	8.2815	VIISAPSADAPMFVMGVNHEK		P16858	G3P_MOUSE Glyceraldehyde-3-phosphate dehydrogenase OS=Mus musculus OX=10090 GN=Gapdh PE=1 SV=2
82.50_2275.1723n	1	#15992	3	82.4967	2275.17	7.3478	LTGMAFRVPTPNVSVVDLTCR		P16858	G3P_MOUSE Glyceraldehyde-3-phosphate dehydrogenase OS=Mus musculus OX=10090 GN=Gapdh PE=1 SV=2
67.71_2368.1992n	1	#10497	3	67.706	2368.2	7.669	RVIISAPSADAPMFVMGVNHEK		P16858	G3P_MOUSE Glyceraldehyde-3-phosphate dehydrogenase OS=Mus musculus OX=10090 GN=Gapdh PE=1 SV=2
94.73_2594.3521n	2	#807,#1705	3,4	94.7274	2594.35	8.1	VIHDNFGIVEGLMTTVHAITATQK		P16858	G3P_MOUSE Glyceraldehyde-3-phosphate dehydrogenase OS=Mus musculus OX=10090 GN=Gapdh PE=1 SV=2
72.57_2932.4466n	2	#4184,#776	3,4	72.5713	2932.45	8.5077	VIISAPSADAPMFVMGVNHEKYDNSLK		P16858	G3P_MOUSE Glyceraldehyde-3-phosphate dehydrogenase OS=Mus musculus OX=10090 GN=Gapdh PE=1 SV=2
91.17_3335.7211n	3	#34041,#2017,#6741	3,4,5	91.1658	3335.72	7.9502	VIHDNFGIVEGLMTTVHAITATQKTVDGPSGK		P16858	G3P_MOUSE Glyceraldehyde-3-phosphate dehydrogenase OS=Mus musculus OX=10090 GN=Gapdh PE=1 SV=2
45.48_852.4510n	1	#46929	2	45.4789	852.451	6.3943	LLEWHR		P06745	G6PI_MOUSE Glucose-6-phosphate isomerase OS=Mus musculus OX=10090 GN=Gpi PE=1 SV=4
47.08_877.5497n	1	#13490	2	47.0807	877.55	6.7248	AVLHVALR		P06745	G6PI_MOUSE Glucose-6-phosphate isomerase OS=Mus musculus OX=10090 GN=Gpi PE=1 SV=4
43.50_958.4469n	1	#89574	1	43.4996	958.447	6.7014	DVMPEVNR		P06745	G6PI_MOUSE Glucose-6-phosphate isomerase OS=Mus musculus OX=10090 GN=Gpi PE=1 SV=4
47.90_958.5105n	1	#72483	2	47.9047	958.511	5.5226	DVMPEVNR		P06745	G6PI_MOUSE Glucose-6-phosphate isomerase OS=Mus musculus OX=10090 GN=Gpi PE=1 SV=4
40.45_1147.6948n	1	#78593	3	40.4451	1147.69	5.8032	AVLHVALRNR		P06745	G6PI_MOUSE Glucose-6-phosphate isomerase OS=Mus musculus OX=10090 GN=Gpi PE=1 SV=4
42.96_1187.6093n	1	#15289	2	42.956	1187.61	5.1499	HFVALSTNTAK		P06745	G6PI_MOUSE Glucose-6-phosphate isomerase OS=Mus musculus OX=10090 GN=Gpi PE=1 SV=4
60.48_1373.6938n	1	#117705	2	60.4799	1373.69	6.5594	LRELFEADPER		P06745	G6PI_MOUSE Glucose-6-phosphate isomerase OS=Mus musculus OX=10090 GN=Gpi PE=1 SV=4
54.93_1457.7891n	1	#30650	3	54.9347	1457.79	6.2728	HFVALSTNTAKVK	[N-term] Acetyl N-TERM|[8] Deamidation N	P06745	G6PI_MOUSE Glucose-6-phosphate isomerase OS=Mus musculus OX=10090 GN=Gpi PE=1 SV=4
39.66_1513.7605n	1	#58319	2	39.6615	1513.76	6.9351	ELQAAGKSPEDLEK		P06745	G6PI_MOUSE Glucose-6-phosphate isomerase OS=Mus musculus OX=10090 GN=Gpi PE=1 SV=4
40.08_1513.7619n	1	#24679	2	40.0848	1513.76	7.1469	ELQAAGKSPEDLEK		P06745	G6PI_MOUSE Glucose-6-phosphate isomerase OS=Mus musculus OX=10090 GN=Gpi PE=1 SV=4
54.11_1774.7900n	1	#30428	2	54.1062	1774.79	5.7278	DNMFSGSKINYTENR		P06745	G6PI_MOUSE Glucose-6-phosphate isomerase OS=Mus musculus OX=10090 GN=Gpi PE=1 SV=4
74.65_2717.3340n	1	#9842	3	74.6458	2717.33	6.7647	IEPELEGSSAVTSHDSSTNGLISFIK		P06745	G6PI_MOUSE Glucose-6-phosphate isomerase OS=Mus musculus OX=10090 GN=Gpi PE=1 SV=4
39.80_2759.3472n	1	#14570	4	39.7988	2759.35	5.8201	IEPELEGSSAVTSHDSSTNGLISFIK	[N-term] Acetyl N-TERM	P06745	G6PI_MOUSE Glucose-6-phosphate isomerase OS=Mus musculus OX=10090 GN=Gpi PE=1 SV=4
39.80_2759.3515n	1	#14926	5	39.7988	2759.35	5.8201	IEPELEGSSAVTSHDSSTNGLISFIK	[N-term] Acetyl N-TERM	P06745	G6PI_MOUSE Glucose-6-phosphate isomerase OS=Mus musculus OX=10090 GN=Gpi PE=1 SV=4
69.48_2845.4304n	2	#1677,#2587	3,4	69.4764	2845.43	8.0874	KIEPELEGSSAVTSHDSSTNGLISFIK		P06745	G6PI_MOUSE Glucose-6-phosphate isomerase OS=Mus musculus OX=10090 GN=Gpi PE=1 SV=4
69.74_3314.6159n	3	#9970,#2645,#3887	3,4,5	69.742	3314.62	7.6466	VDHQTGPIVWGEPGTNGQHAFYQLIHQGTK		P06745	G6PI_MOUSE Glucose-6-phosphate isomerase OS=Mus musculus OX=10090 GN=Gpi PE=1 SV=4
51.06_1050.5282n	1	#160536	1	51.0603	1050.53	6.2959	NLSTFAVDGK		Q9D172	GAL3A_MOUSE Glutamine amidotransferase-like class 1 domain-containing protein 3A_ mitochondrial OS=Mus musculus OX=10090 GN=Gatd3a PE=1 SV=1
79.23_1495.8544n	1	#38452	3	79.2329	1495.85	5.0171	KPIGLCCIAPVLAAK		Q9D172	GAL3A_MOUSE Glutamine amidotransferase-like class 1 domain-containing protein 3A_ mitochondrial OS=Mus musculus OX=10090 GN=Gatd3a PE=1 SV=1
74.15_2454.2597n	1	#4391	3	74.1467	2454.26	7.1299	ITSLAQLNAANHDAAIFPGGFGAAK		Q9D172	GAL3A_MOUSE Glutamine amidotransferase-like class 1 domain-containing protein 3A_ mitochondrial OS=Mus musculus OX=10090 GN=Gatd3a PE=1 SV=1
68.84_2639.3679n	1	#32692	4	68.8391	2639.37	6.9732	GKITSLAQLNAANHDAAIFPGGFGAAK		Q9D172	GAL3A_MOUSE Glutamine amidotransferase-like class 1 domain-containing protein 3A_ mitochondrial OS=Mus musculus OX=10090 GN=Gatd3a PE=1 SV=1
69.27_2639.3772n	2	#2401,#6124	3,4	69.2739	2639.38	7.6095	GKITSLAQLNAANHDAAIFPGGFGAAK		Q9D172	GAL3A_MOUSE Glutamine amidotransferase-like class 1 domain-containing protein 3A_ mitochondrial OS=Mus musculus OX=10090 GN=Gatd3a PE=1 SV=1
72.83_1957.9487n	1	#14378	2	72.8311	1957.95	7.669	ACADATLSQITNNIDPVGR		P62874	GBB1_MOUSE Guanine nucleotide-binding protein G(I)/G(S)/G(T) subunit beta-1 OS=Mus musculus OX=10090 GN=Gnb1 PE=1 SV=3
65.50_2086.0469n	1	#7976	3	65.5001	2086.05	7.3313	KACADATLSQITNNIDPVGR		P62874	GBB1_MOUSE Guanine nucleotide-binding protein G(I)/G(S)/G(T) subunit beta-1 OS=Mus musculus OX=10090 GN=Gnb1 PE=1 SV=3
65.45_2086.0497n	1	#31793	2	65.4528	2086.05	7.3313	KACADATLSQITNNIDPVGR		P62874	GBB1_MOUSE Guanine nucleotide-binding protein G(I)/G(S)/G(T) subunit beta-1 OS=Mus musculus OX=10090 GN=Gnb1 PE=1 SV=3
42.77_3448.6081n	1	#172265	5	42.7672	3448.61	6.2255	AGVLAGHDNRVSCLGVTDDGMAVATGSWDSFLK	[N-term] Acetyl N-TERM|[13] Carboxymethyl C	P62874	GBB1_MOUSE Guanine nucleotide-binding protein G(I)/G(S)/G(T) subunit beta-1 OS=Mus musculus OX=10090 GN=Gnb1 PE=1 SV=3
49.22_1546.7474n	1	#21640	2	49.2197	1546.75	6.7964	GETPVNSTMSIGQAR		P63216	GBG3_MOUSE Guanine nucleotide-binding protein G(I)/G(S)/G(O) subunit gamma-3 OS=Mus musculus OX=10090 GN=Gng3 PE=1 SV=1
48.73_1546.7475n	1	#106471	2	48.7254	1546.75	7.128	GETPVNSTMSIGQAR		P63216	GBG3_MOUSE Guanine nucleotide-binding protein G(I)/G(S)/G(O) subunit gamma-3 OS=Mus musculus OX=10090 GN=Gng3 PE=1 SV=1
59.32_1674.8586n	1	#218652	3	59.3173	1674.86	5.7482	GETPVNSTMSIGQARK		P63216	GBG3_MOUSE Guanine nucleotide-binding protein G(I)/G(S)/G(O) subunit gamma-3 OS=Mus musculus OX=10090 GN=Gng3 PE=1 SV=1
46.54_1805.8730n	1	#28902	2	46.5373	1805.87	6.9397	MKGETPVNSTMSIGQAR		P63216	GBG3_MOUSE Guanine nucleotide-binding protein G(I)/G(S)/G(O) subunit gamma-3 OS=Mus musculus OX=10090 GN=Gng3 PE=1 SV=1
55.88_1847.8884n	1	#57720	2	55.8834	1847.89	6.8644	MKGETPVNSTMSIGQAR	[N-term] Acetyl N-TERM	P63216	GBG3_MOUSE Guanine nucleotide-binding protein G(I)/G(S)/G(O) subunit gamma-3 OS=Mus musculus OX=10090 GN=Gng3 PE=1 SV=1
56.22_1847.8915n	1	#4102	2	56.2219	1847.89	7.1907	MKGETPVNSTMSIGQAR	[N-term] Acetyl N-TERM	P63216	GBG3_MOUSE Guanine nucleotide-binding protein G(I)/G(S)/G(O) subunit gamma-3 OS=Mus musculus OX=10090 GN=Gng3 PE=1 SV=1
58.06_1848.8712n	1	#20887	2	58.0638	1848.87	6.7524	MKGETPVNSTMSIGQAR	[N-term] Acetyl N-TERM|[8] Deamidation N	P63216	GBG3_MOUSE Guanine nucleotide-binding protein G(I)/G(S)/G(O) subunit gamma-3 OS=Mus musculus OX=10090 GN=Gng3 PE=1 SV=1
46.18_941.5091n	1	#60830	1	46.177	941.509	6.9627	GDPGLATIAK		P62812	GBRA1_MOUSE Gamma-aminobutyric acid receptor subunit alpha-1 OS=Mus musculus OX=10090 GN=Gabra1 PE=1 SV=1
45.75_941.5113n	1	#165958	1	45.7535	941.511	6.9156	GDPGLATIAK		P62812	GBRA1_MOUSE Gamma-aminobutyric acid receptor subunit alpha-1 OS=Mus musculus OX=10090 GN=Gabra1 PE=1 SV=1
54.98_1853.8887n	1	#57938	2	54.9809	1853.89	6.6579	NNTYAPTATSYTPNLAR		P62812	GBRA1_MOUSE Gamma-aminobutyric acid receptor subunit alpha-1 OS=Mus musculus OX=10090 GN=Gabra1 PE=1 SV=1
66.95_1121.4742n	1	#93015	2	66.9467	1121.47	5.3876	QNDVFGEADQ		P50396	GDIA_MOUSE Rab GDP dissociation inhibitor alpha OS=Mus musculus OX=10090 GN=Gdi1 PE=1 SV=3
41.59_1249.5617n	1	#7476	2	41.5891	1249.56	7.4951	KQNDVFGEADQ		P50396	GDIA_MOUSE Rab GDP dissociation inhibitor alpha OS=Mus musculus OX=10090 GN=Gdi1 PE=1 SV=3
41.19_1249.5628n	1	#843	2	41.1944	1249.56	8.0604	KQNDVFGEADQ		P50396	GDIA_MOUSE Rab GDP dissociation inhibitor alpha OS=Mus musculus OX=10090 GN=Gdi1 PE=1 SV=3
40.70_1249.5633n	1	#2687	2	40.7025	1249.56	7.7827	KQNDVFGEADQ		P50396	GDIA_MOUSE Rab GDP dissociation inhibitor alpha OS=Mus musculus OX=10090 GN=Gdi1 PE=1 SV=3
63.42_1346.5667n	1	#1685	2	63.4235	1346.57	7.882	MAGSAFDFENMK		P50396	GDIA_MOUSE Rab GDP dissociation inhibitor alpha OS=Mus musculus OX=10090 GN=Gdi1 PE=1 SV=3
61.69_1459.7182n	2	#1,#3	2,3	61.6865	1459.72	5.5394	FQILEGPPESMGR		P50396	GDIA_MOUSE Rab GDP dissociation inhibitor alpha OS=Mus musculus OX=10090 GN=Gdi1 PE=1 SV=3
57.21_1502.6575n	1	#120361	2	57.2107	1502.66	6.1066	RMAGSAFDFENMK		P50396	GDIA_MOUSE Rab GDP dissociation inhibitor alpha OS=Mus musculus OX=10090 GN=Gdi1 PE=1 SV=3
56.52_1502.6682n	2	#3605,#955	2,3	56.5181	1502.67	8.0888	MAGSAFDFENMKR		P50396	GDIA_MOUSE Rab GDP dissociation inhibitor alpha OS=Mus musculus OX=10090 GN=Gdi1 PE=1 SV=3
56.52_1518.6598n	1	#155787	3	56.5181	1518.66	5.6777	MAGSAFDFENMKR	[1] Oxidation M	P50396	GDIA_MOUSE Rab GDP dissociation inhibitor alpha OS=Mus musculus OX=10090 GN=Gdi1 PE=1 SV=3
51.92_1519.6438n	1	#76537	2	51.9162	1519.64	5.7924	RMAGSAFDFENMK	[11] Deamidation N|[12] Oxidation M	P50396	GDIA_MOUSE Rab GDP dissociation inhibitor alpha OS=Mus musculus OX=10090 GN=Gdi1 PE=1 SV=3
72.88_1692.8872n	2	#60439,#31649	2,3	72.8766	1692.89	6.1106	YLDFKVVEGSFVYK		P50396	GDIA_MOUSE Rab GDP dissociation inhibitor alpha OS=Mus musculus OX=10090 GN=Gdi1 PE=1 SV=3
81.72_2140.1210n	3	#26,#2,#4	2,3,4	81.7212	2140.12	6.923	SPYLYPLYGLGELPQGFAR		P50396	GDIA_MOUSE Rab GDP dissociation inhibitor alpha OS=Mus musculus OX=10090 GN=Gdi1 PE=1 SV=3
82.43_2150.0820n	1	#77928	2	82.4258	2150.08	5.9386	FDLGQDVIDFTGHALALYR		P50396	GDIA_MOUSE Rab GDP dissociation inhibitor alpha OS=Mus musculus OX=10090 GN=Gdi1 PE=1 SV=3
86.00_2488.2837n	1	#17140	3	86.0041	2488.28	6.842	YGKSPYLYPLYGLGELPQGFAR		P50396	GDIA_MOUSE Rab GDP dissociation inhibitor alpha OS=Mus musculus OX=10090 GN=Gdi1 PE=1 SV=3
81.14_3260.6641n	1	#7589	5	81.1413	3260.66	6.4869	IICILSHPIKNTNDANSCQIIIPQNQVNR	[13] Deamidation N|[16] Deamidation N	P50396	GDIA_MOUSE Rab GDP dissociation inhibitor alpha OS=Mus musculus OX=10090 GN=Gdi1 PE=1 SV=3
56.62_1605.6845n	2	#46473,#18357	2,3	56.6225	1605.68	7.1454	MTGSEFDFEEMKR		Q61598	GDIB_MOUSE Rab GDP dissociation inhibitor beta OS=Mus musculus OX=10090 GN=Gdi2 PE=1 SV=1
65.55_2069.9016n	1	#71304	3	65.5465	2069.9	6.0274	TDDYLDQPCCETINRIK	[N-term] Acetyl N-TERM|[7] Deamidation Q|[14] Deamidation N	Q61598	GDIB_MOUSE Rab GDP dissociation inhibitor beta OS=Mus musculus OX=10090 GN=Gdi2 PE=1 SV=1
88.20_2941.5464n	1	#131118	4	88.1954	2941.55	5.4082	DLVQDPSLLGGTISAYKIVPDEIEEIK		Q8BUV3	GEPH_MOUSE Gephyrin OS=Mus musculus OX=10090 GN=Gphn PE=1 SV=2
74.65_742.4220n	2	#4139,#15065	1,2	74.6458	742.422	5.4162	MPLGLGR		Q9Z0G0	GIPC1_MOUSE PDZ domain-containing protein GIPC1 OS=Mus musculus OX=10090 GN=Gipc1 PE=1 SV=1
57.14_749.3926n	1	#121224	2	57.1406	749.393	4.8883	EVEVFK		Q9Z0G0	GIPC1_MOUSE PDZ domain-containing protein GIPC1 OS=Mus musculus OX=10090 GN=Gipc1 PE=1 SV=1
102.70_875.5220n	1	#101592	1	102.696	875.522	6.2672	LVFRDVK		P27601	GNA13_MOUSE Guanine nucleotide-binding protein subunit alpha-13 OS=Mus musculus OX=10090 GN=Gna13 PE=1 SV=1
49.39_1035.5114n	1	#172548	2	49.3919	1035.51	6.2296	EFQLGESVK		P27601	GNA13_MOUSE Guanine nucleotide-binding protein subunit alpha-13 OS=Mus musculus OX=10090 GN=Gna13 PE=1 SV=1
60.80_1056.6169n	1	#12995	1	60.8021	1056.62	8.4532	ILLLGAGESGK		P27601	GNA13_MOUSE Guanine nucleotide-binding protein subunit alpha-13 OS=Mus musculus OX=10090 GN=Gna13 PE=1 SV=1
60.76_1056.6206n	1	#608	2	60.756	1056.62	8.4532	ILLLGAGESGK		P27601	GNA13_MOUSE Guanine nucleotide-binding protein subunit alpha-13 OS=Mus musculus OX=10090 GN=Gna13 PE=1 SV=1
65.48_2364.1890n	1	#27749	3	65.4763	2364.19	6.1359	SVLSVCFPGCVLTNGEAEQQRK		P27601	GNA13_MOUSE Guanine nucleotide-binding protein subunit alpha-13 OS=Mus musculus OX=10090 GN=Gna13 PE=1 SV=1
39.85_2947.5190n	1	#181330	5	39.8503	2947.52	5.4169	YFLDNLDKLGVPDYIPSQQDILLAR	[N-term] Acetyl N-TERM	P27601	GNA13_MOUSE Guanine nucleotide-binding protein subunit alpha-13 OS=Mus musculus OX=10090 GN=Gna13 PE=1 SV=1
57.45_2964.4705n	1	#23354	5	57.4497	2964.47	5.7995	VQVVSIKDYFLEFEGDPHCLRDVQK	[2] Deamidation Q	P27601	GNA13_MOUSE Guanine nucleotide-binding protein subunit alpha-13 OS=Mus musculus OX=10090 GN=Gna13 PE=1 SV=1
59.98_1024.4515n	2	#95198,#3988	1,2	59.9833	1024.45	6.0924	NNLKDCGLF	[1] Deamidation N|[2] Deamidation N	B2RSH2	GNAI1_MOUSE Guanine nucleotide-binding protein G(i) subunit alpha-1 OS=Mus musculus OX=10090 GN=Gnai1 PE=1 SV=1
60.80_1056.6169n	1	#12995	1	60.8021	1056.62	8.4532	LLLLGAGESGK		B2RSH2	GNAI1_MOUSE Guanine nucleotide-binding protein G(i) subunit alpha-1 OS=Mus musculus OX=10090 GN=Gnai1 PE=1 SV=1
60.76_1056.6206n	1	#608	2	60.756	1056.62	8.4532	LLLLGAGESGK		B2RSH2	GNAI1_MOUSE Guanine nucleotide-binding protein G(i) subunit alpha-1 OS=Mus musculus OX=10090 GN=Gnai1 PE=1 SV=1
61.35_1584.9401n	1	#37663	3	61.3546	1584.94	7.7131	LLLLGAGESGKSTIVK		B2RSH2	GNAI1_MOUSE Guanine nucleotide-binding protein G(i) subunit alpha-1 OS=Mus musculus OX=10090 GN=Gnai1 PE=1 SV=1
60.76_1584.9405n	1	#9824	2	60.756	1584.94	7.3158	LLLLGAGESGKSTIVK		B2RSH2	GNAI1_MOUSE Guanine nucleotide-binding protein G(i) subunit alpha-1 OS=Mus musculus OX=10090 GN=Gnai1 PE=1 SV=1
61.49_1754.9230n	1	#7308	2	61.4888	1754.92	7.1282	IAQPNYIPTQQDVLR		B2RSH2	GNAI1_MOUSE Guanine nucleotide-binding protein G(i) subunit alpha-1 OS=Mus musculus OX=10090 GN=Gnai1 PE=1 SV=1
38.60_1925.9205n	1	#85460	4	38.6034	1925.92	6.3371	IIHEAGYSEEECKQYK		B2RSH2	GNAI1_MOUSE Guanine nucleotide-binding protein G(i) subunit alpha-1 OS=Mus musculus OX=10090 GN=Gnai1 PE=1 SV=1
81.64_3798.8646n	2	#8463,#2354	4,5	81.6429	3798.86	6.09	EYQLNDSAAYYLNDLDRIAQPNYIPTQQDVLR		B2RSH2	GNAI1_MOUSE Guanine nucleotide-binding protein G(i) subunit alpha-1 OS=Mus musculus OX=10090 GN=Gnai1 PE=1 SV=1
60.80_604.2820n	1	#12043	1	60.8021	604.282	0	GAGESGK		P08752	GNAI2_MOUSE Guanine nucleotide-binding protein G(i) subunit alpha-2 OS=Mus musculus OX=10090 GN=Gnai2 PE=1 SV=5
60.80_717.3651n	1	#28163	1	60.8021	717.365	0	LGAGESGK		P08752	GNAI2_MOUSE Guanine nucleotide-binding protein G(i) subunit alpha-2 OS=Mus musculus OX=10090 GN=Gnai2 PE=1 SV=5
59.98_1024.4515n	2	#95198,#3988	1,2	59.9833	1024.45	6.0924	NNLKDCGLF	[1] Deamidation N|[2] Deamidation N	P08752	GNAI2_MOUSE Guanine nucleotide-binding protein G(i) subunit alpha-2 OS=Mus musculus OX=10090 GN=Gnai2 PE=1 SV=5
60.80_1056.6169n	1	#12995	1	60.8021	1056.62	8.4532	LLLLGAGESGK		P08752	GNAI2_MOUSE Guanine nucleotide-binding protein G(i) subunit alpha-2 OS=Mus musculus OX=10090 GN=Gnai2 PE=1 SV=5
60.76_1056.6206n	1	#608	2	60.756	1056.62	8.4532	LLLLGAGESGK		P08752	GNAI2_MOUSE Guanine nucleotide-binding protein G(i) subunit alpha-2 OS=Mus musculus OX=10090 GN=Gnai2 PE=1 SV=5
61.35_1584.9401n	1	#37663	3	61.3546	1584.94	7.7131	LLLLGAGESGKSTIVK		P08752	GNAI2_MOUSE Guanine nucleotide-binding protein G(i) subunit alpha-2 OS=Mus musculus OX=10090 GN=Gnai2 PE=1 SV=5
60.76_1584.9405n	1	#9824	2	60.756	1584.94	7.3158	LLLLGAGESGKSTIVK		P08752	GNAI2_MOUSE Guanine nucleotide-binding protein G(i) subunit alpha-2 OS=Mus musculus OX=10090 GN=Gnai2 PE=1 SV=5
60.29_1745.8917n	1	#4543	2	60.2936	1745.89	7.0082	IAQSDYIPTQQDVLR		P08752	GNAI2_MOUSE Guanine nucleotide-binding protein G(i) subunit alpha-2 OS=Mus musculus OX=10090 GN=Gnai2 PE=1 SV=5
59.50_1746.8770n	1	#32929	2	59.504	1746.88	6.3727	IAQSDYIPTQQDVLR	[3] Deamidation Q	P08752	GNAI2_MOUSE Guanine nucleotide-binding protein G(i) subunit alpha-2 OS=Mus musculus OX=10090 GN=Gnai2 PE=1 SV=5
75.70_2183.1696n	1	#45057	3	75.7027	2183.17	6.3276	QYRAVVYSNTIQSIMAIVK		P08752	GNAI2_MOUSE Guanine nucleotide-binding protein G(i) subunit alpha-2 OS=Mus musculus OX=10090 GN=Gnai2 PE=1 SV=5
75.73_2183.1885n	1	#15800	3	75.7262	2183.19	6.3276	QYRAVVYSNTIQSIMAIVK		P08752	GNAI2_MOUSE Guanine nucleotide-binding protein G(i) subunit alpha-2 OS=Mus musculus OX=10090 GN=Gnai2 PE=1 SV=5
54.76_1043.4945n	2	#78647,#21591	1,2	54.7605	1043.49	7.8409	YYLDSLDR		P18872	GNAO_MOUSE Guanine nucleotide-binding protein G(o) subunit alpha OS=Mus musculus OX=10090 GN=Gnao1 PE=1 SV=3
60.80_1056.6169n	1	#12995	1	60.8021	1056.62	8.4532	LLLLGAGESGK		P18872	GNAO_MOUSE Guanine nucleotide-binding protein G(o) subunit alpha OS=Mus musculus OX=10090 GN=Gnao1 PE=1 SV=3
60.76_1056.6206n	1	#608	2	60.756	1056.62	8.4532	LLLLGAGESGK		P18872	GNAO_MOUSE Guanine nucleotide-binding protein G(o) subunit alpha OS=Mus musculus OX=10090 GN=Gnao1 PE=1 SV=3
43.33_1444.6852n	1	#21262	3	43.3278	1444.69	7.1027	IIHEDGFSGEDVK		P18872	GNAO_MOUSE Guanine nucleotide-binding protein G(o) subunit alpha OS=Mus musculus OX=10090 GN=Gnao1 PE=1 SV=3
38.20_1486.7949n	2	#175044,#5667	2,3	38.2002	1486.79	8.4249	NLKEDGISAAKDVK		P18872	GNAO_MOUSE Guanine nucleotide-binding protein G(o) subunit alpha OS=Mus musculus OX=10090 GN=Gnao1 PE=1 SV=3
38.69_1486.8004n	1	#2608	3	38.6892	1486.8	8.4934	NLKEDGISAAKDVK		P18872	GNAO_MOUSE Guanine nucleotide-binding protein G(o) subunit alpha OS=Mus musculus OX=10090 GN=Gnao1 PE=1 SV=3
48.02_1582.7333n	2	#16155,#23344	2,3	48.0191	1582.73	8.2184	AMDTLGVEYGDKER		P18872	GNAO_MOUSE Guanine nucleotide-binding protein G(o) subunit alpha OS=Mus musculus OX=10090 GN=Gnao1 PE=1 SV=3
61.35_1584.9401n	1	#37663	3	61.3546	1584.94	7.7131	LLLLGAGESGKSTIVK		P18872	GNAO_MOUSE Guanine nucleotide-binding protein G(o) subunit alpha OS=Mus musculus OX=10090 GN=Gnao1 PE=1 SV=3
60.76_1584.9405n	1	#9824	2	60.756	1584.94	7.3158	LLLLGAGESGKSTIVK		P18872	GNAO_MOUSE Guanine nucleotide-binding protein G(o) subunit alpha OS=Mus musculus OX=10090 GN=Gnao1 PE=1 SV=3
59.45_1674.8373n	2	#902,#42364	2,3	59.4454	1674.84	8.3406	IGAGDYQPTEQDILR		P18872	GNAO_MOUSE Guanine nucleotide-binding protein G(o) subunit alpha OS=Mus musculus OX=10090 GN=Gnao1 PE=1 SV=3
69.58_2091.9774n	1	#31536	2	69.5832	2091.98	7.4563	EYQLNDSAKYYLDSLDR		P18872	GNAO_MOUSE Guanine nucleotide-binding protein G(o) subunit alpha OS=Mus musculus OX=10090 GN=Gnao1 PE=1 SV=3
68.82_2092.0023n	1	#92664	3	68.8154	2092	6.9974	EYQLNDSAKYYLDSLDR		P18872	GNAO_MOUSE Guanine nucleotide-binding protein G(o) subunit alpha OS=Mus musculus OX=10090 GN=Gnao1 PE=1 SV=3
69.03_2092.0850n	1	#6110	3	69.0262	2092.09	6.9974	EYQLNDSAKYYLDSLDR		P18872	GNAO_MOUSE Guanine nucleotide-binding protein G(o) subunit alpha OS=Mus musculus OX=10090 GN=Gnao1 PE=1 SV=3
75.96_2700.3027n	1	#11775	3	75.9631	2700.3	7.8226	YYLDSLDRIGAGDYQPTEQDILR		P18872	GNAO_MOUSE Guanine nucleotide-binding protein G(o) subunit alpha OS=Mus musculus OX=10090 GN=Gnao1 PE=1 SV=3
77.62_3575.8543n	1	#20336	4	77.6171	3575.85	7.1777	IIHEDGFSGEDVKQYKPVVYSNTIQSLAAIVR		P18872	GNAO_MOUSE Guanine nucleotide-binding protein G(o) subunit alpha OS=Mus musculus OX=10090 GN=Gnao1 PE=1 SV=3
77.64_3575.8644n	1	#15667	5	77.6414	3575.86	7.1777	IIHEDGFSGEDVKQYKPVVYSNTIQSLAAIVR		P18872	GNAO_MOUSE Guanine nucleotide-binding protein G(o) subunit alpha OS=Mus musculus OX=10090 GN=Gnao1 PE=1 SV=3
55.56_3697.6890n	1	#187894	4	55.5612	3697.69	6.1443	SPLTICFPEYPGSNTYEDAAAYIQTQFESKNR	[6] Carboxymethyl C	P18872	GNAO_MOUSE Guanine nucleotide-binding protein G(o) subunit alpha OS=Mus musculus OX=10090 GN=Gnao1 PE=1 SV=3
71.28_434.1949n	1	#47496	1	71.2752	434.195	0	EMR		Q6R0H7	GNAS1_MOUSE Guanine nucleotide-binding protein G(s) subunit alpha isoforms XLas OS=Mus musculus OX=10090 GN=Gnas PE=1 SV=1
76.61_434.1949n	1	#2571	1	76.6122	434.195	0	EMR		Q6R0H7	GNAS1_MOUSE Guanine nucleotide-binding protein G(s) subunit alpha isoforms XLas OS=Mus musculus OX=10090 GN=Gnas PE=1 SV=1
76.68_434.1949n	1	#4534	1	76.6783	434.195	0	EMR		Q6R0H7	GNAS1_MOUSE Guanine nucleotide-binding protein G(s) subunit alpha isoforms XLas OS=Mus musculus OX=10090 GN=Gnas PE=1 SV=1
76.62_547.2789n	2	#1271,#18473	1,2	76.6234	547.279	0	IEMR		Q6R0H7	GNAS1_MOUSE Guanine nucleotide-binding protein G(s) subunit alpha isoforms XLas OS=Mus musculus OX=10090 GN=Gnas PE=1 SV=1
76.68_547.2791n	1	#3837	1	76.6783	547.279	0	IEMR		Q6R0H7	GNAS1_MOUSE Guanine nucleotide-binding protein G(s) subunit alpha isoforms XLas OS=Mus musculus OX=10090 GN=Gnas PE=1 SV=1
55.05_747.3578n	1	#107670	1	55.0506	747.358	6.5775	EAIEMR		Q6R0H7	GNAS1_MOUSE Guanine nucleotide-binding protein G(s) subunit alpha isoforms XLas OS=Mus musculus OX=10090 GN=Gnas PE=1 SV=1
71.23_747.3578n	1	#55669	1	71.2278	747.358	6.7635	EAIEMR		Q6R0H7	GNAS1_MOUSE Guanine nucleotide-binding protein G(s) subunit alpha isoforms XLas OS=Mus musculus OX=10090 GN=Gnas PE=1 SV=1
76.72_747.3581n	1	#20752	1	76.7243	747.358	6.5438	EAIEMR		Q6R0H7	GNAS1_MOUSE Guanine nucleotide-binding protein G(s) subunit alpha isoforms XLas OS=Mus musculus OX=10090 GN=Gnas PE=1 SV=1
76.63_747.3584n	1	#10130	1	76.6345	747.358	6.5438	EAIEMR		Q6R0H7	GNAS1_MOUSE Guanine nucleotide-binding protein G(s) subunit alpha isoforms XLas OS=Mus musculus OX=10090 GN=Gnas PE=1 SV=1
76.66_747.3588n	1	#51095	2	76.6566	747.359	6.5438	EAIEMR		Q6R0H7	GNAS1_MOUSE Guanine nucleotide-binding protein G(s) subunit alpha isoforms XLas OS=Mus musculus OX=10090 GN=Gnas PE=1 SV=1
76.61_747.3596n	1	#120468	2	76.6122	747.36	6.5438	EAIEMR		Q6R0H7	GNAS1_MOUSE Guanine nucleotide-binding protein G(s) subunit alpha isoforms XLas OS=Mus musculus OX=10090 GN=Gnas PE=1 SV=1
44.59_1036.5518n	1	#174239	2	44.592	1036.55	6.3283	ALPAEPGNIR		Q6R0H7	GNAS1_MOUSE Guanine nucleotide-binding protein G(s) subunit alpha isoforms XLas OS=Mus musculus OX=10090 GN=Gnas PE=1 SV=1
60.80_1056.6169n	1	#12995	1	60.8021	1056.62	8.4532	LLLLGAGESGK		Q6R0H7	GNAS1_MOUSE Guanine nucleotide-binding protein G(s) subunit alpha isoforms XLas OS=Mus musculus OX=10090 GN=Gnas PE=1 SV=1
60.76_1056.6206n	1	#608	2	60.756	1056.62	8.4532	LLLLGAGESGK		Q6R0H7	GNAS1_MOUSE Guanine nucleotide-binding protein G(s) subunit alpha isoforms XLas OS=Mus musculus OX=10090 GN=Gnas PE=1 SV=1
61.35_1584.9401n	1	#37663	3	61.3546	1584.94	7.7131	LLLLGAGESGKSTIVK		Q6R0H7	GNAS1_MOUSE Guanine nucleotide-binding protein G(s) subunit alpha isoforms XLas OS=Mus musculus OX=10090 GN=Gnas PE=1 SV=1
60.76_1584.9405n	1	#9824	2	60.756	1584.94	7.3158	LLLLGAGESGKSTIVK		Q6R0H7	GNAS1_MOUSE Guanine nucleotide-binding protein G(s) subunit alpha isoforms XLas OS=Mus musculus OX=10090 GN=Gnas PE=1 SV=1
42.58_1728.9697n	1	#189697	4	42.5785	1728.97	5.1671	RPGLPRSHTVGSNPVR		Q6R0H7	GNAS1_MOUSE Guanine nucleotide-binding protein G(s) subunit alpha isoforms XLas OS=Mus musculus OX=10090 GN=Gnas PE=1 SV=1
43.36_1773.7688n	1	#72448	2	43.3621	1773.77	7.0151	YTTPEDATPEPGEDPR		Q6R0H7	GNAS1_MOUSE Guanine nucleotide-binding protein G(s) subunit alpha isoforms XLas OS=Mus musculus OX=10090 GN=Gnas PE=1 SV=1
51.25_2108.9457n	2	#155122,#31890	2,3	51.2511	2108.95	6.2499	ILHVNGFNGEGGEEDPQAAR		Q6R0H7	GNAS1_MOUSE Guanine nucleotide-binding protein G(s) subunit alpha isoforms XLas OS=Mus musculus OX=10090 GN=Gnas PE=1 SV=1
53.08_2443.1503n	1	#96097	4	53.0837	2443.15	5.8313	EAAEMEGSPTTATAVEGKVPSPER		Q6R0H7	GNAS1_MOUSE Guanine nucleotide-binding protein G(s) subunit alpha isoforms XLas OS=Mus musculus OX=10090 GN=Gnas PE=1 SV=1
79.67_4171.0741n	1	#18181	5	79.6669	4171.07	5.8912	DPAAEPASEAVPATTAESASGAAPVTQVEPAAAAVSATLAEPAAR		Q6R0H7	GNAS1_MOUSE Guanine nucleotide-binding protein G(s) subunit alpha isoforms XLas OS=Mus musculus OX=10090 GN=Gnas PE=1 SV=1
60.80_1056.6169n	1	#12995	1	60.8021	1056.62	8.4532	LLLLGAGESGK		P20612	GNAT1_MOUSE Guanine nucleotide-binding protein G(t) subunit alpha-1 OS=Mus musculus OX=10090 GN=Gnat1 PE=1 SV=3
60.76_1056.6206n	1	#608	2	60.756	1056.62	8.4532	LLLLGAGESGK		P20612	GNAT1_MOUSE Guanine nucleotide-binding protein G(t) subunit alpha-1 OS=Mus musculus OX=10090 GN=Gnat1 PE=1 SV=3
66.90_1148.5793n	1	#28586	2	66.9007	1148.58	5.8665	VQFLELNMR		P20612	GNAT1_MOUSE Guanine nucleotide-binding protein G(t) subunit alpha-1 OS=Mus musculus OX=10090 GN=Gnat1 PE=1 SV=3
61.35_1584.9401n	1	#37663	3	61.3546	1584.94	7.7131	LLLLGAGESGKSTIVK		P20612	GNAT1_MOUSE Guanine nucleotide-binding protein G(t) subunit alpha-1 OS=Mus musculus OX=10090 GN=Gnat1 PE=1 SV=3
60.76_1584.9405n	1	#9824	2	60.756	1584.94	7.3158	LLLLGAGESGKSTIVK		P20612	GNAT1_MOUSE Guanine nucleotide-binding protein G(t) subunit alpha-1 OS=Mus musculus OX=10090 GN=Gnat1 PE=1 SV=3
35.71_2235.9859n	2	#180857,#14004	2,3	35.7123	2235.99	5.8124	ASEYQLNDSAGYYLSDLER	[N-term] Acetyl N-TERM|[7] Deamidation N	P20612	GNAT1_MOUSE Guanine nucleotide-binding protein G(t) subunit alpha-1 OS=Mus musculus OX=10090 GN=Gnat1 PE=1 SV=3
60.80_1056.6169n	1	#12995	1	60.8021	1056.62	8.4532	LLLLGAGESGK		P50149	GNAT2_MOUSE Guanine nucleotide-binding protein G(t) subunit alpha-2 OS=Mus musculus OX=10090 GN=Gnat2 PE=2 SV=2
60.76_1056.6206n	1	#608	2	60.756	1056.62	8.4532	LLLLGAGESGK		P50149	GNAT2_MOUSE Guanine nucleotide-binding protein G(t) subunit alpha-2 OS=Mus musculus OX=10090 GN=Gnat2 PE=2 SV=2
53.49_1124.5694n	1	#7840	2	53.4923	1124.57	5.7993	FSVKDLNFR		P50149	GNAT2_MOUSE Guanine nucleotide-binding protein G(t) subunit alpha-2 OS=Mus musculus OX=10090 GN=Gnat2 PE=2 SV=2
61.35_1584.9401n	1	#37663	3	61.3546	1584.94	7.7131	LLLLGAGESGKSTIVK		P50149	GNAT2_MOUSE Guanine nucleotide-binding protein G(t) subunit alpha-2 OS=Mus musculus OX=10090 GN=Gnat2 PE=2 SV=2
60.76_1584.9405n	1	#9824	2	60.756	1584.94	7.3158	LLLLGAGESGKSTIVK		P50149	GNAT2_MOUSE Guanine nucleotide-binding protein G(t) subunit alpha-2 OS=Mus musculus OX=10090 GN=Gnat2 PE=2 SV=2
60.80_1056.6169n	1	#12995	1	60.8021	1056.62	8.4532	LLLLGAGESGK		Q3V3I2	GNAT3_MOUSE Guanine nucleotide-binding protein G(t) subunit alpha-3 OS=Mus musculus OX=10090 GN=Gnat3 PE=1 SV=2
60.76_1056.6206n	1	#608	2	60.756	1056.62	8.4532	LLLLGAGESGK		Q3V3I2	GNAT3_MOUSE Guanine nucleotide-binding protein G(t) subunit alpha-3 OS=Mus musculus OX=10090 GN=Gnat3 PE=1 SV=2
46.72_1419.7745n	2	#1878,#249	2,3	46.7175	1419.77	5.2557	AMATLGIDYVNPR		Q3V3I2	GNAT3_MOUSE Guanine nucleotide-binding protein G(t) subunit alpha-3 OS=Mus musculus OX=10090 GN=Gnat3 PE=1 SV=2
61.35_1584.9401n	1	#37663	3	61.3546	1584.94	7.7131	LLLLGAGESGKSTIVK		Q3V3I2	GNAT3_MOUSE Guanine nucleotide-binding protein G(t) subunit alpha-3 OS=Mus musculus OX=10090 GN=Gnat3 PE=1 SV=2
60.76_1584.9405n	1	#9824	2	60.756	1584.94	7.3158	LLLLGAGESGKSTIVK		Q3V3I2	GNAT3_MOUSE Guanine nucleotide-binding protein G(t) subunit alpha-3 OS=Mus musculus OX=10090 GN=Gnat3 PE=1 SV=2
47.75_1143.6119n	1	#11574	2	47.75	1143.61	6.6896	ITEIPETVSR		Q8C419	GP158_MOUSE Probable G-protein coupled receptor 158 OS=Mus musculus OX=10090 GN=Gpr158 PE=1 SV=2
57.76_1282.6238n	1	#3960	2	57.7632	1282.62	6.4625	ASAPDPSIPWSR		Q8C419	GP158_MOUSE Probable G-protein coupled receptor 158 OS=Mus musculus OX=10090 GN=Gpr158 PE=1 SV=2
38.76_1646.7225n	1	#38389	2	38.7578	1646.72	5.9459	VENENLNQMGDQEK		Q8C419	GP158_MOUSE Probable G-protein coupled receptor 158 OS=Mus musculus OX=10090 GN=Gpr158 PE=1 SV=2
58.67_1965.0875n	2	#19472,#6304	2,3	58.6749	1965.09	6.9375	SVTLPASSALSANKIPGPQK		Q8C419	GP158_MOUSE Probable G-protein coupled receptor 158 OS=Mus musculus OX=10090 GN=Gpr158 PE=1 SV=2
79.18_2142.9833n	1	#50937	2	79.1848	2142.98	6.2633	AEVCPWEFEPLEQPNAER		Q8C419	GP158_MOUSE Probable G-protein coupled receptor 158 OS=Mus musculus OX=10090 GN=Gpr158 PE=1 SV=2
59.71_4353.9440n	1	#90141	4	59.7116	4353.94	5.6137	SHSTYDHVRDQTVESSSLPMESQEEEATENSTLESLSSK		Q8C419	GP158_MOUSE Probable G-protein coupled receptor 158 OS=Mus musculus OX=10090 GN=Gpr158 PE=1 SV=2
42.24_1416.6747n	1	#25966	2	42.2354	1416.67	5.6243	EEQELQDIQSR	[N-term] Acetyl N-TERM|[9] Deamidation Q	P35803	GPM6B_MOUSE Neuronal membrane glycoprotein M6-b OS=Mus musculus OX=10090 GN=Gpm6b PE=1 SV=2
39.75_1572.7907n	3	#20041,#15595,#54097	2,3,4	39.753	1572.79	8.1241	AKEEQELQDIQSR		P35803	GPM6B_MOUSE Neuronal membrane glycoprotein M6-b OS=Mus musculus OX=10090 GN=Gpm6b PE=1 SV=2
45.62_2179.0552n	1	#144960	3	45.6161	2179.06	5.5032	MKPAMETAAEENTEQSQER		P35803	GPM6B_MOUSE Neuronal membrane glycoprotein M6-b OS=Mus musculus OX=10090 GN=Gpm6b PE=1 SV=2
49.58_2220.9657n	1	#78220	2	49.5821	2220.97	7.3228	MKPAMETAAEENTEQSQER	[N-term] Acetyl N-TERM	P35803	GPM6B_MOUSE Neuronal membrane glycoprotein M6-b OS=Mus musculus OX=10090 GN=Gpm6b PE=1 SV=2
49.53_2220.9745n	1	#28242	3	49.5294	2220.97	7.3228	MKPAMETAAEENTEQSQER	[N-term] Acetyl N-TERM	P35803	GPM6B_MOUSE Neuronal membrane glycoprotein M6-b OS=Mus musculus OX=10090 GN=Gpm6b PE=1 SV=2
49.17_2220.9884n	1	#51594	3	49.1679	2220.99	6.6454	MKPAMETAAEENTEQSQER	[N-term] Acetyl N-TERM	P35803	GPM6B_MOUSE Neuronal membrane glycoprotein M6-b OS=Mus musculus OX=10090 GN=Gpm6b PE=1 SV=2
58.44_1176.6104n	1	#17730	2	58.4383	1176.61	6.0434	SLGTWGSLSAAK		Q3UNH4	GRIN1_MOUSE G protein-regulated inducer of neurite outgrowth 1 OS=Mus musculus OX=10090 GN=Gprin1 PE=1 SV=2
50.72_1270.6485n	1	#32708	2	50.7204	1270.65	6.0335	AEGIPELQASEK		Q3UNH4	GRIN1_MOUSE G protein-regulated inducer of neurite outgrowth 1 OS=Mus musculus OX=10090 GN=Gprin1 PE=1 SV=2
52.45_1565.8612n	1	#31995	2	52.4455	1565.86	6.5791	KVDPPTTVEPVSLGK		Q3UNH4	GRIN1_MOUSE G protein-regulated inducer of neurite outgrowth 1 OS=Mus musculus OX=10090 GN=Gprin1 PE=1 SV=2
51.86_1627.6948n	1	#61155	2	51.8607	1627.69	5.4947	MDGNSLKQADSTSTR	[1] Oxidation M|[4] Deamidation N|[8] Deamidation Q	Q3UNH4	GRIN1_MOUSE G protein-regulated inducer of neurite outgrowth 1 OS=Mus musculus OX=10090 GN=Gprin1 PE=1 SV=2
51.88_1627.6993n	1	#37041	2	51.8791	1627.7	5.4947	MDGNSLKQADSTSTR	[1] Oxidation M|[4] Deamidation N|[8] Deamidation Q	Q3UNH4	GRIN1_MOUSE G protein-regulated inducer of neurite outgrowth 1 OS=Mus musculus OX=10090 GN=Gprin1 PE=1 SV=2
41.35_1772.8833n	1	#78299	2	41.3488	1772.88	6.7314	SIGSLPEREPSASTSQK		Q3UNH4	GRIN1_MOUSE G protein-regulated inducer of neurite outgrowth 1 OS=Mus musculus OX=10090 GN=Gprin1 PE=1 SV=2
39.87_1865.8739n	1	#155335	5	39.8674	1865.87	5.4129	MAETVSARQPEGMFPAK	[1] Oxidation M|[9] Deamidation Q	Q3UNH4	GRIN1_MOUSE G protein-regulated inducer of neurite outgrowth 1 OS=Mus musculus OX=10090 GN=Gprin1 PE=1 SV=2
57.21_2150.1913n	1	#103654	2	57.2107	2150.19	6.6717	VITQIPGATSPGKVETPSLQK		Q3UNH4	GRIN1_MOUSE G protein-regulated inducer of neurite outgrowth 1 OS=Mus musculus OX=10090 GN=Gprin1 PE=1 SV=2
57.21_2150.1939n	1	#5264	3	57.2107	2150.19	6.6717	VITQIPGATSPGKVETPSLQK		Q3UNH4	GRIN1_MOUSE G protein-regulated inducer of neurite outgrowth 1 OS=Mus musculus OX=10090 GN=Gprin1 PE=1 SV=2
49.88_2612.3360n	1	#54541	3	49.8771	2612.34	5.7423	SIGSLPEREPSASTSQKDLAAAAAQK		Q3UNH4	GRIN1_MOUSE G protein-regulated inducer of neurite outgrowth 1 OS=Mus musculus OX=10090 GN=Gprin1 PE=1 SV=2
50.37_971.5868n	1	#152996	2	50.371	971.587	6.3619	NVPFKIVR		P38647	GRP75_MOUSE Stress-70 protein_ mitochondrial OS=Mus musculus OX=10090 GN=Hspa9 PE=1 SV=3
57.38_1449.7124n	1	#4628	2	57.3808	1449.71	6.8772	TTPSVVAFTADGER		P38647	GRP75_MOUSE Stress-70 protein_ mitochondrial OS=Mus musculus OX=10090 GN=Hspa9 PE=1 SV=3
68.15_1693.8377n	1	#31897	2	68.1548	1693.84	6.4331	NAVITVPAYFNDSQR		P38647	GRP75_MOUSE Stress-70 protein_ mitochondrial OS=Mus musculus OX=10090 GN=Hspa9 PE=1 SV=3
41.85_1723.8548n	1	#15112	3	41.8464	1723.85	6.5043	QAVTNPNNTFYATKR		P38647	GRP75_MOUSE Stress-70 protein_ mitochondrial OS=Mus musculus OX=10090 GN=Hspa9 PE=1 SV=3
47.72_1843.9909n	1	#192292	3	47.7157	1843.99	5.4117	GTGREQQIVIQSSGGLSK		P38647	GRP75_MOUSE Stress-70 protein_ mitochondrial OS=Mus musculus OX=10090 GN=Hspa9 PE=1 SV=3
43.99_1845.9474n	1	#5889	3	43.9915	1845.95	5.7449	RETGVDLTKDNMALQR		P38647	GRP75_MOUSE Stress-70 protein_ mitochondrial OS=Mus musculus OX=10090 GN=Hspa9 PE=1 SV=3
79.28_2019.9916n	1	#12478	2	79.2818	2019.99	5.6095	GAVVGIDLGTTNSCVAVMEGK		P38647	GRP75_MOUSE Stress-70 protein_ mitochondrial OS=Mus musculus OX=10090 GN=Hspa9 PE=1 SV=3
76.07_1153.5515n	1	#175132	2	76.0656	1153.55	4.9677	SQEVAYTDIK	[2] Deamidation Q	Q2NL51	GSK3A_MOUSE Glycogen synthase kinase-3 alpha OS=Mus musculus OX=10090 GN=Gsk3a PE=1 SV=2
40.24_2432.0567n	1	#34066	3	40.2392	2432.06	6.8441	TSSFAEPGGGGGGGGGGPGGSASGPGGTGGGK		Q2NL51	GSK3A_MOUSE Glycogen synthase kinase-3 alpha OS=Mus musculus OX=10090 GN=Gsk3a PE=1 SV=2
52.97_2522.2679n	2	#5322,#3266	4,5	52.9682	2522.27	5.2362	VLGTPTREQIREMNPNYTEFK		Q2NL51	GSK3A_MOUSE Glycogen synthase kinase-3 alpha OS=Mus musculus OX=10090 GN=Gsk3a PE=1 SV=2
37.75_2659.2001n	1	#125588	3	37.7512	2659.2	6.6735	ARTSSFAEPGGGGGGGGGGPGGSASGPGGTGGGK		Q2NL51	GSK3A_MOUSE Glycogen synthase kinase-3 alpha OS=Mus musculus OX=10090 GN=Gsk3a PE=1 SV=2
60.69_762.4221n	1	#15463	1	60.687	762.422	0	ATPIFSK		P10649	GSTM1_MOUSE Glutathione S-transferase Mu 1 OS=Mus musculus OX=10090 GN=Gstm1 PE=1 SV=2
60.73_762.4275n	1	#4195	1	60.7329	762.428	0	ATPIFSK		P10649	GSTM1_MOUSE Glutathione S-transferase Mu 1 OS=Mus musculus OX=10090 GN=Gstm1 PE=1 SV=2
58.86_945.4403n	1	#185482	1	58.8607	945.44	5.8514	SQWLNEK	[N-term] Acetyl N-TERM	P10649	GSTM1_MOUSE Glutathione S-transferase Mu 1 OS=Mus musculus OX=10090 GN=Gstm1 PE=1 SV=2
60.71_1038.5739n	2	#6666,#2477	1,2	60.7098	1038.57	8.3347	YIATPIFSK		P10649	GSTM1_MOUSE Glutathione S-transferase Mu 1 OS=Mus musculus OX=10090 GN=Gstm1 PE=1 SV=2
44.32_1935.9633n	1	#25406	3	44.3175	1935.96	7.3158	AFLSSPEHVNRPINGNGK		P19157	GSTP1_MOUSE Glutathione S-transferase P 1 OS=Mus musculus OX=10090 GN=Gstp1 PE=1 SV=2
44.03_2064.0505n	2	#27225,#1858	2,3	44.0258	2064.05	7.534	AFLSSPEHVNRPINGNGKQ		P19157	GSTP1_MOUSE Glutathione S-transferase P 1 OS=Mus musculus OX=10090 GN=Gstp1 PE=1 SV=2
45.62_400.1579n	1	#78763	1	45.6161	400.158	0	SEAA	[N-term] Acetyl N-TERM	P15864	H12_MOUSE Histone H1.2 OS=Mus musculus OX=10090 GN=Hist1h1c PE=1 SV=2
50.63_537.2919n	1	#56154	2	50.629	537.292	0	KASGPP		P15864	H12_MOUSE Histone H1.2 OS=Mus musculus OX=10090 GN=Hist1h1c PE=1 SV=2
45.65_540.2749n	1	#44791	1	45.6505	540.275	0	PPAEK		P15864	H12_MOUSE Histone H1.2 OS=Mus musculus OX=10090 GN=Hist1h1c PE=1 SV=2
45.63_540.2911n	1	#101977	1	45.6333	540.291	0	PPAEK		P15864	H12_MOUSE Histone H1.2 OS=Mus musculus OX=10090 GN=Hist1h1c PE=1 SV=2
44.76_972.5827n	1	#89849	2	44.7636	972.583	7.0711	SGVSLAALKK		P15864	H12_MOUSE Histone H1.2 OS=Mus musculus OX=10090 GN=Hist1h1c PE=1 SV=2
45.20_972.5871n	1	#31997	2	45.2041	972.587	6.9639	SGVSLAALKK		P15864	H12_MOUSE Histone H1.2 OS=Mus musculus OX=10090 GN=Hist1h1c PE=1 SV=2
44.16_1106.5562n	1	#212242	1	44.163	1106.56	8.0334	ALAAAGYDVEK		P15864	H12_MOUSE Histone H1.2 OS=Mus musculus OX=10090 GN=Hist1h1c PE=1 SV=2
44.65_1106.5603n	2	#109677,#4714	1,2	44.6521	1106.56	8.0315	ALAAAGYDVEK		P15864	H12_MOUSE Histone H1.2 OS=Mus musculus OX=10090 GN=Hist1h1c PE=1 SV=2
35.55_1165.6050n	1	#214692	3	35.5493	1165.6	7.3199	GTGASGSFKLNK		P15864	H12_MOUSE Histone H1.2 OS=Mus musculus OX=10090 GN=Hist1h1c PE=1 SV=2
57.09_1197.6527n	1	#3555	2	57.0943	1197.65	6.8003	ASGPPVSELITK		P15864	H12_MOUSE Histone H1.2 OS=Mus musculus OX=10090 GN=Hist1h1c PE=1 SV=2
50.43_1325.7571n	1	#6796	2	50.426	1325.76	7.6525	KASGPPVSELITK		P15864	H12_MOUSE Histone H1.2 OS=Mus musculus OX=10090 GN=Hist1h1c PE=1 SV=2
50.32_1325.7573n	1	#23763	3	50.316	1325.76	7.6525	KASGPPVSELITK		P15864	H12_MOUSE Histone H1.2 OS=Mus musculus OX=10090 GN=Hist1h1c PE=1 SV=2
45.65_1489.7400n	1	#6478	2	45.6505	1489.74	7.0279	SEAAPAAPAAAPPAEK	[N-term] Acetyl N-TERM	P15864	H12_MOUSE Histone H1.2 OS=Mus musculus OX=10090 GN=Hist1h1c PE=1 SV=2
39.70_1577.7790n	1	#40269	2	39.6959	1577.78	7.7565	ALAAAGYDVEKNNSR		P15864	H12_MOUSE Histone H1.2 OS=Mus musculus OX=10090 GN=Hist1h1c PE=1 SV=2
40.02_1577.7806n	1	#22713	2	40.0162	1577.78	7.9585	ALAAAGYDVEKNNSR		P15864	H12_MOUSE Histone H1.2 OS=Mus musculus OX=10090 GN=Hist1h1c PE=1 SV=2
40.02_1577.7821n	1	#5792	3	40.0162	1577.78	7.9585	ALAAAGYDVEKNNSR		P15864	H12_MOUSE Histone H1.2 OS=Mus musculus OX=10090 GN=Hist1h1c PE=1 SV=2
46.98_1578.7496n	1	#101984	2	46.9778	1578.75	6.2837	MSEAAPAAPAAAPPAEK		P15864	H12_MOUSE Histone H1.2 OS=Mus musculus OX=10090 GN=Hist1h1c PE=1 SV=2
45.50_430.1697n	1	#30974	1	45.496	430.17	0	SETA	[N-term] Acetyl N-TERM	P43274	H14_MOUSE Histone H1.4 OS=Mus musculus OX=10090 GN=Hist1h1e PE=1 SV=2
45.84_430.1701n	1	#7441	1	45.8393	430.17	0	SETA	[N-term] Acetyl N-TERM	P43274	H14_MOUSE Histone H1.4 OS=Mus musculus OX=10090 GN=Hist1h1e PE=1 SV=2
45.87_611.3284n	1	#65922	1	45.8737	611.328	0	PAPAEK		P43274	H14_MOUSE Histone H1.4 OS=Mus musculus OX=10090 GN=Hist1h1e PE=1 SV=2
45.51_669.2970n	1	#49084	1	45.5132	669.297	0	SETAPAA	[N-term] Acetyl N-TERM	P43274	H14_MOUSE Histone H1.4 OS=Mus musculus OX=10090 GN=Hist1h1e PE=1 SV=2
44.76_972.5827n	1	#89849	2	44.7636	972.583	7.0711	SGVSLAALKK		P43274	H14_MOUSE Histone H1.4 OS=Mus musculus OX=10090 GN=Hist1h1e PE=1 SV=2
45.20_972.5871n	1	#31997	2	45.2041	972.587	6.9639	SGVSLAALKK		P43274	H14_MOUSE Histone H1.4 OS=Mus musculus OX=10090 GN=Hist1h1e PE=1 SV=2
44.16_1106.5562n	1	#212242	1	44.163	1106.56	8.0334	ALAAAGYDVEK		P43274	H14_MOUSE Histone H1.4 OS=Mus musculus OX=10090 GN=Hist1h1e PE=1 SV=2
44.65_1106.5603n	2	#109677,#4714	1,2	44.6521	1106.56	8.0315	ALAAAGYDVEK		P43274	H14_MOUSE Histone H1.4 OS=Mus musculus OX=10090 GN=Hist1h1e PE=1 SV=2
35.55_1165.6050n	1	#214692	3	35.5493	1165.6	7.3199	GTGASGSFKLNK		P43274	H14_MOUSE Histone H1.4 OS=Mus musculus OX=10090 GN=Hist1h1e PE=1 SV=2
57.33_1227.6730n	1	#841	2	57.3344	1227.67	7.4158	TSGPPVSELITK		P43274	H14_MOUSE Histone H1.4 OS=Mus musculus OX=10090 GN=Hist1h1e PE=1 SV=2
42.32_1259.7333n	2	#46388,#93952	2,3	42.3212	1259.73	6.8373	SLVSKGTLVQTK		P43274	H14_MOUSE Histone H1.4 OS=Mus musculus OX=10090 GN=Hist1h1e PE=1 SV=2
42.05_1259.7449n	1	#89054	2	42.0466	1259.74	6.713	SLVSKGTLVQTK		P43274	H14_MOUSE Histone H1.4 OS=Mus musculus OX=10090 GN=Hist1h1e PE=1 SV=2
45.50_1519.7537n	1	#3062	2	45.496	1519.75	7.5497	SETAPAAPAAPAPAEK	[N-term] Acetyl N-TERM	P43274	H14_MOUSE Histone H1.4 OS=Mus musculus OX=10090 GN=Hist1h1e PE=1 SV=2
45.84_1519.7548n	1	#750	2	45.8393	1519.75	7.7151	SETAPAAPAAPAPAEK	[N-term] Acetyl N-TERM	P43274	H14_MOUSE Histone H1.4 OS=Mus musculus OX=10090 GN=Hist1h1e PE=1 SV=2
39.70_1577.7790n	1	#40269	2	39.6959	1577.78	7.7565	ALAAAGYDVEKNNSR		P43274	H14_MOUSE Histone H1.4 OS=Mus musculus OX=10090 GN=Hist1h1e PE=1 SV=2
40.02_1577.7806n	1	#22713	2	40.0162	1577.78	7.9585	ALAAAGYDVEKNNSR		P43274	H14_MOUSE Histone H1.4 OS=Mus musculus OX=10090 GN=Hist1h1e PE=1 SV=2
40.02_1577.7821n	1	#5792	3	40.0162	1577.78	7.9585	ALAAAGYDVEKNNSR		P43274	H14_MOUSE Histone H1.4 OS=Mus musculus OX=10090 GN=Hist1h1e PE=1 SV=2
54.53_1754.9777n	1	#13834	4	54.5287	1754.98	5.9924	TSGPPVSELITKAVAASK		P43274	H14_MOUSE Histone H1.4 OS=Mus musculus OX=10090 GN=Hist1h1e PE=1 SV=2
44.16_1106.5562n	1	#212242	1	44.163	1106.56	8.0334	ALAAAGYDVEK		Q07133	H1T_MOUSE Histone H1t OS=Mus musculus OX=10090 GN=Hist1h1t PE=1 SV=4
44.65_1106.5603n	2	#109677,#4714	1,2	44.6521	1106.56	8.0315	ALAAAGYDVEK		Q07133	H1T_MOUSE Histone H1t OS=Mus musculus OX=10090 GN=Hist1h1t PE=1 SV=4
39.70_1577.7790n	1	#40269	2	39.6959	1577.78	7.7565	ALAAAGYDVEKNNSR		Q07133	H1T_MOUSE Histone H1t OS=Mus musculus OX=10090 GN=Hist1h1t PE=1 SV=4
40.02_1577.7806n	1	#22713	2	40.0162	1577.78	7.9585	ALAAAGYDVEKNNSR		Q07133	H1T_MOUSE Histone H1t OS=Mus musculus OX=10090 GN=Hist1h1t PE=1 SV=4
40.02_1577.7821n	1	#5792	3	40.0162	1577.78	7.9585	ALAAAGYDVEKNNSR		Q07133	H1T_MOUSE Histone H1t OS=Mus musculus OX=10090 GN=Hist1h1t PE=1 SV=4
45.91_2153.1500n	1	#18402	3	45.9081	2153.15	6.1814	SETAPAASSTLVPAPVEKPSSK		Q07133	H1T_MOUSE Histone H1t OS=Mus musculus OX=10090 GN=Hist1h1t PE=1 SV=4
45.87_611.3284n	1	#65922	1	45.8737	611.328	5.5568	SAPAPK	[N-term] Acetyl N-TERM	Q6ZWY9	H2B1C_MOUSE Histone H2B type 1-C/E/G OS=Mus musculus OX=10090 GN=Hist1h2bc PE=1 SV=3
64.28_613.3412n	1	#10147	1	64.2829	613.341	0	PGELAK		Q6ZWY9	H2B1C_MOUSE Histone H2B type 1-C/E/G OS=Mus musculus OX=10090 GN=Hist1h2bc PE=1 SV=3
64.31_613.3438n	1	#2931	1	64.3062	613.344	0	PGELAK		Q6ZWY9	H2B1C_MOUSE Histone H2B type 1-C/E/G OS=Mus musculus OX=10090 GN=Hist1h2bc PE=1 SV=3
41.45_663.3550n	1	#9443	1	41.4518	663.355	6.3096	STITSR		Q6ZWY9	H2B1C_MOUSE Histone H2B type 1-C/E/G OS=Mus musculus OX=10090 GN=Hist1h2bc PE=1 SV=3
41.44_663.3595n	2	#6804,#15253	1,2	41.4432	663.359	6.3096	STITSR		Q6ZWY9	H2B1C_MOUSE Histone H2B type 1-C/E/G OS=Mus musculus OX=10090 GN=Hist1h2bc PE=1 SV=3
64.29_952.5954n	2	#26556,#5201	1,2	64.2946	952.595	7.9923	LLLPGELAK		Q6ZWY9	H2B1C_MOUSE Histone H2B type 1-C/E/G OS=Mus musculus OX=10090 GN=Hist1h2bc PE=1 SV=3
77.15_1750.0304n	1	#51215	3	77.1505	1750.03	7.1513	EIQTAVRLLLPGELAK		Q6ZWY9	H2B1C_MOUSE Histone H2B type 1-C/E/G OS=Mus musculus OX=10090 GN=Hist1h2bc PE=1 SV=3
77.15_1750.0339n	1	#46857	2	77.1505	1750.03	7.1513	EIQTAVRLLLPGELAK		Q6ZWY9	H2B1C_MOUSE Histone H2B type 1-C/E/G OS=Mus musculus OX=10090 GN=Hist1h2bc PE=1 SV=3
41.64_544.2839n	1	#57997	1	41.6405	544.284	6.5016	ADLAR		Q3UHX2	HAP28_MOUSE 28 kDa heat- and acid-stable phosphoprotein OS=Mus musculus OX=10090 GN=Pdap1 PE=1 SV=1
43.50_919.4841n	1	#33880	2	43.4996	919.484	6.5491	MQSLSLNK		Q3UHX2	HAP28_MOUSE 28 kDa heat- and acid-stable phosphoprotein OS=Mus musculus OX=10090 GN=Pdap1 PE=1 SV=1
53.52_1569.8288n	1	#35750	3	53.516	1569.83	6.4016	VTQLDLDGPKELSR		Q3UHX2	HAP28_MOUSE 28 kDa heat- and acid-stable phosphoprotein OS=Mus musculus OX=10090 GN=Pdap1 PE=1 SV=1
57.68_1848.8768n	1	#23766	2	57.6758	1848.88	6.7129	QYTSPEEIDAQLQAEK		Q3UHX2	HAP28_MOUSE 28 kDa heat- and acid-stable phosphoprotein OS=Mus musculus OX=10090 GN=Pdap1 PE=1 SV=1
61.81_2053.0661n	2	#53387,#23071	2,3	61.8066	2053.07	5.8154	GVEGLIDIENPNRVAQTTK		Q3UHX2	HAP28_MOUSE 28 kDa heat- and acid-stable phosphoprotein OS=Mus musculus OX=10090 GN=Pdap1 PE=1 SV=1
54.18_2104.0481n	2	#66877,#16064	2,3	54.177	2104.05	6.9287	VRQYTSPEEIDAQLQAEK		Q3UHX2	HAP28_MOUSE 28 kDa heat- and acid-stable phosphoprotein OS=Mus musculus OX=10090 GN=Pdap1 PE=1 SV=1
52.90_2105.0237n	1	#57142	3	52.8982	2105.02	5.9705	QYTSPEEIDAQLQAEKQK		Q3UHX2	HAP28_MOUSE 28 kDa heat- and acid-stable phosphoprotein OS=Mus musculus OX=10090 GN=Pdap1 PE=1 SV=1
43.93_841.3714n	2	#105152,#93712	1,2	43.9286	841.371	0	IGGHGAEYG		P01942	HBA_MOUSE Hemoglobin subunit alpha OS=Mus musculus OX=10090 GN=Hba PE=1 SV=2
43.95_841.3751n	1	#52463	1	43.9457	841.375	0	IGGHGAEYG		P01942	HBA_MOUSE Hemoglobin subunit alpha OS=Mus musculus OX=10090 GN=Hba PE=1 SV=2
57.12_1028.5026n	2	#2324,#207	1,2	57.1176	1028.5	9.1801	MFASFPTTK		P01942	HBA_MOUSE Hemoglobin subunit alpha OS=Mus musculus OX=10090 GN=Hba PE=1 SV=2
43.43_1528.7292n	1	#2754	2	43.4309	1528.73	8.802	IGGHGAEYGAEALER		P01942	HBA_MOUSE Hemoglobin subunit alpha OS=Mus musculus OX=10090 GN=Hba PE=1 SV=2
43.94_1528.7307n	2	#775,#412	2,3	43.9429	1528.73	9.2733	IGGHGAEYGAEALER		P01942	HBA_MOUSE Hemoglobin subunit alpha OS=Mus musculus OX=10090 GN=Hba PE=1 SV=2
43.38_1528.7349n	1	#2194	3	43.3792	1528.73	8.802	IGGHGAEYGAEALER		P01942	HBA_MOUSE Hemoglobin subunit alpha OS=Mus musculus OX=10090 GN=Hba PE=1 SV=2
35.15_1818.8470n	1	#142825	3	35.1546	1818.85	6.0194	TYFPHFDVSHGSAQVK		P01942	HBA_MOUSE Hemoglobin subunit alpha OS=Mus musculus OX=10090 GN=Hba PE=1 SV=2
55.55_1818.8766n	3	#3367,#548,#853	2,3,4	55.5534	1818.88	9.0239	TYFPHFDVSHGSAQVK		P01942	HBA_MOUSE Hemoglobin subunit alpha OS=Mus musculus OX=10090 GN=Hba PE=1 SV=2
52.55_2041.9962n	2	#52423,#17766	2,3	52.5473	2042	8.383	AAWGKIGGHGAEYGAEALER		P01942	HBA_MOUSE Hemoglobin subunit alpha OS=Mus musculus OX=10090 GN=Hba PE=1 SV=2
47.77_2198.0620n	2	#115802,#31680	2,3	47.7671	2198.06	8.5248	TYFPHFDVSHGSAQVKGHGK		P01942	HBA_MOUSE Hemoglobin subunit alpha OS=Mus musculus OX=10090 GN=Hba PE=1 SV=2
47.74_2198.0656n	2	#5928,#5816	4,5	47.7414	2198.07	8.5248	TYFPHFDVSHGSAQVKGHGK		P01942	HBA_MOUSE Hemoglobin subunit alpha OS=Mus musculus OX=10090 GN=Hba PE=1 SV=2
69.66_2829.3625n	3	#16420,#3902,#5721	3,4,5	69.663	2829.36	8.0008	MFASFPTTKTYFPHFDVSHGSAQVK		P01942	HBA_MOUSE Hemoglobin subunit alpha OS=Mus musculus OX=10090 GN=Hba PE=1 SV=2
46.11_1135.6685n	1	#47350	2	46.1084	1135.67	7.9827	VVAGVATALAHK		P02088	HBB1_MOUSE Hemoglobin subunit beta-1 OS=Mus musculus OX=10090 GN=Hbb-b1 PE=1 SV=2
46.11_1135.6714n	1	#122563	3	46.1084	1135.67	7.9827	VVAGVATALAHK		P02088	HBB1_MOUSE Hemoglobin subunit beta-1 OS=Mus musculus OX=10090 GN=Hbb-b1 PE=1 SV=2
75.66_1273.7198n	1	#315	2	75.6555	1273.72	8.6702	LLVVYPWTQR		P02088	HBB1_MOUSE Hemoglobin subunit beta-1 OS=Mus musculus OX=10090 GN=Hbb-b1 PE=1 SV=2
41.43_1301.6227n	1	#9710	2	41.4346	1301.62	8.2462	VNSDEVGGEALGR		P02088	HBB1_MOUSE Hemoglobin subunit beta-1 OS=Mus musculus OX=10090 GN=Hbb-b1 PE=1 SV=2
41.90_1301.6227n	1	#1561	2	41.8979	1301.62	8.3213	VNSDEVGGEALGR		P02088	HBB1_MOUSE Hemoglobin subunit beta-1 OS=Mus musculus OX=10090 GN=Hbb-b1 PE=1 SV=2
48.88_1435.7860n	1	#47988	2	48.88	1435.79	8.4118	VVAGVATALAHKYH		P02088	HBB1_MOUSE Hemoglobin subunit beta-1 OS=Mus musculus OX=10090 GN=Hbb-b1 PE=1 SV=2
48.62_1435.7899n	2	#78388,#13720	2,3	48.6199	1435.79	8.015	VVAGVATALAHKYH		P02088	HBB1_MOUSE Hemoglobin subunit beta-1 OS=Mus musculus OX=10090 GN=Hbb-b1 PE=1 SV=2
48.93_1435.7923n	1	#6337	3	48.9317	1435.79	8.4609	VVAGVATALAHKYH		P02088	HBB1_MOUSE Hemoglobin subunit beta-1 OS=Mus musculus OX=10090 GN=Hbb-b1 PE=1 SV=2
83.95_1713.0105n	1	#55192	3	83.9543	1713.01	6.8656	LLGNMIVIVLGHHLGK		P02088	HBB1_MOUSE Hemoglobin subunit beta-1 OS=Mus musculus OX=10090 GN=Hbb-b1 PE=1 SV=2
67.68_1755.9110n	1	#9198	3	67.6828	1755.91	7.7083	VITAFNDGLNHLDSLK		P02088	HBB1_MOUSE Hemoglobin subunit beta-1 OS=Mus musculus OX=10090 GN=Hbb-b1 PE=1 SV=2
78.94_1979.8808n	1	#194660	2	78.9423	1979.88	8.0132	YFDSFGDLSSASAIMGNAK		P02088	HBB1_MOUSE Hemoglobin subunit beta-1 OS=Mus musculus OX=10090 GN=Hbb-b1 PE=1 SV=2
47.87_3277.6075n	1	#156928	3	47.8702	3277.61	6.4558	LLVVYPWTQRYFDSFGDLSSASAIMGNAK	[N-term] Acetyl N-TERM	P02088	HBB1_MOUSE Hemoglobin subunit beta-1 OS=Mus musculus OX=10090 GN=Hbb-b1 PE=1 SV=2
55.88_1090.5888n	1	#18614	2	55.8834	1090.59	7.4038	VITAFNEGLK		P02089	HBB2_MOUSE Hemoglobin subunit beta-2 OS=Mus musculus OX=10090 GN=Hbb-b2 PE=1 SV=2
46.11_1135.6685n	1	#47350	2	46.1084	1135.67	7.9827	VVAGVATALAHK		P02089	HBB2_MOUSE Hemoglobin subunit beta-2 OS=Mus musculus OX=10090 GN=Hbb-b2 PE=1 SV=2
46.11_1135.6714n	1	#122563	3	46.1084	1135.67	7.9827	VVAGVATALAHK		P02089	HBB2_MOUSE Hemoglobin subunit beta-2 OS=Mus musculus OX=10090 GN=Hbb-b2 PE=1 SV=2
49.20_1218.6648n	1	#134562	2	49.2025	1218.66	6.9506	KVITAFNEGLK		P02089	HBB2_MOUSE Hemoglobin subunit beta-2 OS=Mus musculus OX=10090 GN=Hbb-b2 PE=1 SV=2
75.66_1273.7198n	1	#315	2	75.6555	1273.72	8.6702	LLVVYPWTQR		P02089	HBB2_MOUSE Hemoglobin subunit beta-2 OS=Mus musculus OX=10090 GN=Hbb-b2 PE=1 SV=2
47.98_1311.6475n	1	#4365	2	47.9848	1311.65	7.759	VNPDEVGGEALGR		P02089	HBB2_MOUSE Hemoglobin subunit beta-2 OS=Mus musculus OX=10090 GN=Hbb-b2 PE=1 SV=2
48.88_1435.7860n	1	#47988	2	48.88	1435.79	8.4118	VVAGVATALAHKYH		P02089	HBB2_MOUSE Hemoglobin subunit beta-2 OS=Mus musculus OX=10090 GN=Hbb-b2 PE=1 SV=2
48.62_1435.7899n	2	#78388,#13720	2,3	48.6199	1435.79	8.015	VVAGVATALAHKYH		P02089	HBB2_MOUSE Hemoglobin subunit beta-2 OS=Mus musculus OX=10090 GN=Hbb-b2 PE=1 SV=2
48.93_1435.7923n	1	#6337	3	48.9317	1435.79	8.4609	VVAGVATALAHKYH		P02089	HBB2_MOUSE Hemoglobin subunit beta-2 OS=Mus musculus OX=10090 GN=Hbb-b2 PE=1 SV=2
77.67_1653.0069n	1	#72482	3	77.6656	1653.01	6.6508	LLGNAIVIVLGHHLGK		P02089	HBB2_MOUSE Hemoglobin subunit beta-2 OS=Mus musculus OX=10090 GN=Hbb-b2 PE=1 SV=2
78.65_2005.9085n	1	#155194	2	78.6452	2005.91	6.8404	YFDSFGDLSSASAIMGNPK		P02089	HBB2_MOUSE Hemoglobin subunit beta-2 OS=Mus musculus OX=10090 GN=Hbb-b2 PE=1 SV=2
79.14_2005.9104n	1	#29624	2	79.1353	2005.91	7.4765	YFDSFGDLSSASAIMGNPK		P02089	HBB2_MOUSE Hemoglobin subunit beta-2 OS=Mus musculus OX=10090 GN=Hbb-b2 PE=1 SV=2
75.70_325.2364n	1	#86285	1	75.7027	325.236	0	LLV		P02104	HBE_MOUSE Hemoglobin subunit epsilon-Y2 OS=Mus musculus OX=10090 GN=Hbb-y PE=1 SV=2
75.63_325.2422n	1	#112240	1	75.6316	325.242	0	LLV		P02104	HBE_MOUSE Hemoglobin subunit epsilon-Y2 OS=Mus musculus OX=10090 GN=Hbb-y PE=1 SV=2
75.63_686.3483n	1	#5584	1	75.6316	686.348	0	PWTQR		P02104	HBE_MOUSE Hemoglobin subunit epsilon-Y2 OS=Mus musculus OX=10090 GN=Hbb-y PE=1 SV=2
45.99_1165.6668n	1	#171599	2	45.9883	1165.67	5.723	LVAGVATALSHK		P02104	HBE_MOUSE Hemoglobin subunit epsilon-Y2 OS=Mus musculus OX=10090 GN=Hbb-y PE=1 SV=2
46.01_1165.6703n	1	#202271	3	46.0054	1165.67	5.723	LVAGVATALSHK		P02104	HBE_MOUSE Hemoglobin subunit epsilon-Y2 OS=Mus musculus OX=10090 GN=Hbb-y PE=1 SV=2
75.66_1273.7198n	1	#315	2	75.6555	1273.72	8.6702	LLVVYPWTQR		P02104	HBE_MOUSE Hemoglobin subunit epsilon-Y2 OS=Mus musculus OX=10090 GN=Hbb-y PE=1 SV=2
42.68_1084.5258n	1	#177104	2	42.6815	1084.53	5.4823	RQYGFMQR		O88704	HCN1_MOUSE Potassium/sodium hyperpolarization-activated cyclic nucleotide-gated channel 1 OS=Mus musculus OX=10090 GN=Hcn1 PE=1 SV=1
42.75_1084.5310n	1	#39333	2	42.7501	1084.53	5.4823	RQYGFMQR		O88704	HCN1_MOUSE Potassium/sodium hyperpolarization-activated cyclic nucleotide-gated channel 1 OS=Mus musculus OX=10090 GN=Hcn1 PE=1 SV=1
44.51_1383.6737n	1	#17284	2	44.5062	1383.67	5.8211	DLFPYEESKEK		P51859	HDGF_MOUSE Hepatoma-derived growth factor OS=Mus musculus OX=10090 GN=Hdgf PE=1 SV=2
61.42_3033.4490n	2	#18561,#5807	3,4	61.4219	3033.45	6.4637	ESGDHEEEDKEIAALEGERPLPVEVEK		P51859	HDGF_MOUSE Hepatoma-derived growth factor OS=Mus musculus OX=10090 GN=Hdgf PE=1 SV=2
85.15_3096.5595n	1	#14402	4	85.149	3096.56	5.5086	YQVFFFGTHETAFLGPKDLFPYEESK		P51859	HDGF_MOUSE Hepatoma-derived growth factor OS=Mus musculus OX=10090 GN=Hdgf PE=1 SV=2
56.31_4220.7890n	1	#60940	4	56.3123	4220.79	6.1262	NSTPSEPDSGQGPPAEEEEGEEEAAKEEAEAQGVRDHESL		P51859	HDGF_MOUSE Hepatoma-derived growth factor OS=Mus musculus OX=10090 GN=Hdgf PE=1 SV=2
57.00_4220.8020n	1	#16284	4	57.0022	4220.8	6.4491	NSTPSEPDSGQGPPAEEEEGEEEAAKEEAEAQGVRDHESL		P51859	HDGF_MOUSE Hepatoma-derived growth factor OS=Mus musculus OX=10090 GN=Hdgf PE=1 SV=2
47.37_823.4949n	1	#161	2	47.3724	823.495	5.1074	LIHGTVGK		Q640R3	HECAM_MOUSE Hepatocyte cell adhesion molecule OS=Mus musculus OX=10090 GN=Hepacam PE=1 SV=2
46.62_1290.5460n	1	#637	2	46.6231	1290.55	5.7967	EQDESGQVEISA		Q640R3	HECAM_MOUSE Hepatocyte cell adhesion molecule OS=Mus musculus OX=10090 GN=Hepacam PE=1 SV=2
56.68_1880.9265n	1	#4996	2	56.6801	1880.93	6.8387	STTEPGPPGYSVSPPVPGR		Q640R3	HECAM_MOUSE Hepatocyte cell adhesion molecule OS=Mus musculus OX=10090 GN=Hepacam PE=1 SV=2
65.14_2601.3503n	1	#4208	3	65.1386	2601.35	6.1998	STTEPGPPGYSVSPPVPGRSPGLPIR		Q640R3	HECAM_MOUSE Hepatocyte cell adhesion molecule OS=Mus musculus OX=10090 GN=Hepacam PE=1 SV=2
61.69_2698.4895n	1	#7825	4	61.6865	2698.49	5.4576	RDKPVTVVQSIGTEVIGTLRPDYR		Q640R3	HECAM_MOUSE Hepatocyte cell adhesion molecule OS=Mus musculus OX=10090 GN=Hepacam PE=1 SV=2
53.20_1387.7096n	1	#2691	2	53.2	1387.71	8.2354	AQVAQPGGDTIFGK		P70349	HINT1_MOUSE Histidine triad nucleotide-binding protein 1 OS=Mus musculus OX=10090 GN=Hint1 PE=1 SV=3
49.60_1797.8408n	1	#63579	2	49.6002	1797.84	6.773	LPATSAESESAVISNGEH		Q8JZK9	HMCS1_MOUSE Hydroxymethylglutaryl-CoA synthase_ cytoplasmic OS=Mus musculus OX=10090 GN=Hmgcs1 PE=1 SV=1
58.71_2626.3151n	2	#80370,#32876	4,5	58.7092	2626.32	5.4058	DVGIVALEIYFPSQYVDQAELEK	[14] Deamidation Q	Q8JZK9	HMCS1_MOUSE Hydroxymethylglutaryl-CoA synthase_ cytoplasmic OS=Mus musculus OX=10090 GN=Hmgcs1 PE=1 SV=1
69.91_1653.9109n	1	#43752	3	69.9136	1653.91	6.2684	LSAMPVPFTPELKPK		Q9JL35	HMGN5_MOUSE High mobility group nucleosome-binding domain-containing protein 5 OS=Mus musculus OX=10090 GN=Hmgn5 PE=1 SV=2
87.52_5002.0068n	1	#14433	5	87.5249	5002.01	4.7656	EGQPEEDGKEDQPEEDGKEGQCKEDGKEGHHEEGGKEDLHEEDGK		Q9JL35	HMGN5_MOUSE High mobility group nucleosome-binding domain-containing protein 5 OS=Mus musculus OX=10090 GN=Hmgn5 PE=1 SV=2
44.92_996.4391n	1	#79828	2	44.918	996.439	7.0284	GGDLMAYDR		P61979	HNRPK_MOUSE Heterogeneous nuclear ribonucleoprotein K OS=Mus musculus OX=10090 GN=Hnrnpk PE=1 SV=1
37.22_997.3808n	2	#134834,#13401	1,2	37.2193	997.381	7.1331	DYDDMSPR		P61979	HNRPK_MOUSE Heterogeneous nuclear ribonucleoprotein K OS=Mus musculus OX=10090 GN=Hnrnpk PE=1 SV=1
36.20_997.3825n	1	#69717	2	36.1956	997.382	6.9235	DYDDMSPR		P61979	HNRPK_MOUSE Heterogeneous nuclear ribonucleoprotein K OS=Mus musculus OX=10090 GN=Hnrnpk PE=1 SV=1
58.74_1193.6901n	1	#12797	2	58.7443	1193.69	6.1984	NLPLPPPPPPR		P61979	HNRPK_MOUSE Heterogeneous nuclear ribonucleoprotein K OS=Mus musculus OX=10090 GN=Hnrnpk PE=1 SV=1
52.46_1410.8346n	1	#107409	2	52.4626	1410.83	5.6292	ILLQSKNAGAVIGK		P61979	HNRPK_MOUSE Heterogeneous nuclear ribonucleoprotein K OS=Mus musculus OX=10090 GN=Hnrnpk PE=1 SV=1
52.60_1410.8399n	1	#11401	3	52.6005	1410.84	5.6292	ILLQSKNAGAVIGK		P61979	HNRPK_MOUSE Heterogeneous nuclear ribonucleoprotein K OS=Mus musculus OX=10090 GN=Hnrnpk PE=1 SV=1
42.61_851.3521n	1	#217694	1	42.6128	851.352	5.4263	MGQTMER		Q9D0E1	HNRPM_MOUSE Heterogeneous nuclear ribonucleoprotein M OS=Mus musculus OX=10090 GN=Hnrnpm PE=1 SV=3
42.65_851.3538n	1	#56226	1	42.6472	851.354	5.4263	MGQTMER		Q9D0E1	HNRPM_MOUSE Heterogeneous nuclear ribonucleoprotein M OS=Mus musculus OX=10090 GN=Hnrnpm PE=1 SV=3
38.02_1043.5625n	1	#164947	2	38.0201	1043.56	5.6916	LSGREIDVR		Q9D0E1	HNRPM_MOUSE Heterogeneous nuclear ribonucleoprotein M OS=Mus musculus OX=10090 GN=Hnrnpm PE=1 SV=3
40.79_1081.5079n	1	#16229	2	40.7883	1081.51	5.645	FEPYSNPTK		Q9D0E1	HNRPM_MOUSE Heterogeneous nuclear ribonucleoprotein M OS=Mus musculus OX=10090 GN=Hnrnpm PE=1 SV=3
40.81_1081.5081n	1	#135492	1	40.8055	1081.51	5.645	FEPYSNPTK		Q9D0E1	HNRPM_MOUSE Heterogeneous nuclear ribonucleoprotein M OS=Mus musculus OX=10090 GN=Hnrnpm PE=1 SV=3
57.47_1113.6414n	1	#15678	3	57.4726	1113.64	5.6619	INEILSNALK		Q9D0E1	HNRPM_MOUSE Heterogeneous nuclear ribonucleoprotein M OS=Mus musculus OX=10090 GN=Hnrnpm PE=1 SV=3
40.87_1297.6349n	1	#48260	2	40.8741	1297.63	6.311	QGGGGAGGSVPGIER		Q9D0E1	HNRPM_MOUSE Heterogeneous nuclear ribonucleoprotein M OS=Mus musculus OX=10090 GN=Hnrnpm PE=1 SV=3
59.82_1426.7124n	2	#39,#19197	2,3	59.8168	1426.71	6.9131	MGPAMGPALGAGIER		Q9D0E1	HNRPM_MOUSE Heterogeneous nuclear ribonucleoprotein M OS=Mus musculus OX=10090 GN=Hnrnpm PE=1 SV=3
52.41_1555.8084n	1	#30130	3	52.4068	1555.81	6.5375	MAAPIDRVGQTIER		Q9D0E1	HNRPM_MOUSE Heterogeneous nuclear ribonucleoprotein M OS=Mus musculus OX=10090 GN=Hnrnpm PE=1 SV=3
63.58_1612.7674n	1	#15792	3	63.5848	1612.77	6.0178	MGPLGLDHMASSIER		Q9D0E1	HNRPM_MOUSE Heterogeneous nuclear ribonucleoprotein M OS=Mus musculus OX=10090 GN=Hnrnpm PE=1 SV=3
63.24_1612.7800n	2	#9106,#5131	2,3	63.2409	1612.78	6.3387	MGPLGLDHMASSIER		Q9D0E1	HNRPM_MOUSE Heterogeneous nuclear ribonucleoprotein M OS=Mus musculus OX=10090 GN=Hnrnpm PE=1 SV=3
60.46_1661.7952n	1	#128	2	60.4565	1661.8	5.658	MATGLERMGANNLER		Q9D0E1	HNRPM_MOUSE Heterogeneous nuclear ribonucleoprotein M OS=Mus musculus OX=10090 GN=Hnrnpm PE=1 SV=3
66.06_1695.7451n	1	#8764	2	66.0572	1695.75	5.7109	IGGMEGPFGGGMENMGR		Q9D0E1	HNRPM_MOUSE Heterogeneous nuclear ribonucleoprotein M OS=Mus musculus OX=10090 GN=Hnrnpm PE=1 SV=3
49.03_1870.8822n	1	#71426	4	49.0292	1870.88	5.9676	MGAGLGHGMDRVGSEIER		Q9D0E1	HNRPM_MOUSE Heterogeneous nuclear ribonucleoprotein M OS=Mus musculus OX=10090 GN=Hnrnpm PE=1 SV=3
53.18_2023.9849n	1	#106743	3	53.1769	2023.98	5.6674	QGGGGAGGSVPGIERMGPGIDR		Q9D0E1	HNRPM_MOUSE Heterogeneous nuclear ribonucleoprotein M OS=Mus musculus OX=10090 GN=Hnrnpm PE=1 SV=3
57.78_2033.9490n	1	#79962	3	57.7847	2033.95	6.1755	GNFGGSFAGSFGGAGGHAPGVAR		Q9D0E1	HNRPM_MOUSE Heterogeneous nuclear ribonucleoprotein M OS=Mus musculus OX=10090 GN=Hnrnpm PE=1 SV=3
84.64_2177.0387n	1	#134590	2	84.6399	2177.04	6.5621	GIGMGNLGPAGMGMEGIGFGINK		Q9D0E1	HNRPM_MOUSE Heterogeneous nuclear ribonucleoprotein M OS=Mus musculus OX=10090 GN=Hnrnpm PE=1 SV=3
85.03_2177.0520n	1	#16651	2	85.0275	2177.05	6.9509	GIGMGNLGPAGMGMEGIGFGINK		Q9D0E1	HNRPM_MOUSE Heterogeneous nuclear ribonucleoprotein M OS=Mus musculus OX=10090 GN=Hnrnpm PE=1 SV=3
63.33_3509.5667n	1	#14362	4	63.332	3509.57	5.628	MAAGVEAAAEVAATEPKMEEESGAPCVPSGNGAPGPK		Q9D0E1	HNRPM_MOUSE Heterogeneous nuclear ribonucleoprotein M OS=Mus musculus OX=10090 GN=Hnrnpm PE=1 SV=3
86.73_4665.3531n	1	#11228	5	86.7321	4665.35	6.4517	AMQKVMATTGGMGMGPGGPGMINIPPSILNNPNIPNEIIHALQAGR		Q9D0E1	HNRPM_MOUSE Heterogeneous nuclear ribonucleoprotein M OS=Mus musculus OX=10090 GN=Hnrnpm PE=1 SV=3
45.53_628.3015n	1	#40927	1	45.5303	628.301	5.9157	GGAPGNR	[6] Deamidation N	Q8VEK3	HNRPU_MOUSE Heterogeneous nuclear ribonucleoprotein U OS=Mus musculus OX=10090 GN=Hnrnpu PE=1 SV=1
84.12_910.4777n	1	#7838	1	84.122	910.478	4.9362	MMVAGFKK		Q8VEK3	HNRPU_MOUSE Heterogeneous nuclear ribonucleoprotein U OS=Mus musculus OX=10090 GN=Hnrnpu PE=1 SV=1
45.70_1279.6989n	1	#90986	3	45.702	1279.7	6.1039	DLPEHAVLKMK		Q8VEK3	HNRPU_MOUSE Heterogeneous nuclear ribonucleoprotein U OS=Mus musculus OX=10090 GN=Hnrnpu PE=1 SV=1
52.67_1375.7474n	1	#55028	2	52.6656	1375.75	5.8423	NGQDLGVAFKISK		Q8VEK3	HNRPU_MOUSE Heterogeneous nuclear ribonucleoprotein U OS=Mus musculus OX=10090 GN=Hnrnpu PE=1 SV=1
46.99_1612.8154n	1	#203051	3	46.9949	1612.82	5.8496	LNTLLQRAPQCLGK	[10] Deamidation Q|[11] Carboxymethyl C	Q8VEK3	HNRPU_MOUSE Heterogeneous nuclear ribonucleoprotein U OS=Mus musculus OX=10090 GN=Hnrnpu PE=1 SV=1
44.64_1633.8676n	2	#19629,#30274	3,4	44.6435	1633.87	6.3663	AEVEGKDLPEHAVLK		Q8VEK3	HNRPU_MOUSE Heterogeneous nuclear ribonucleoprotein U OS=Mus musculus OX=10090 GN=Hnrnpu PE=1 SV=1
45.04_1633.8771n	2	#21728,#49230	3,4	45.041	1633.88	5.7497	AEVEGKDLPEHAVLK		Q8VEK3	HNRPU_MOUSE Heterogeneous nuclear ribonucleoprotein U OS=Mus musculus OX=10090 GN=Hnrnpu PE=1 SV=1
60.82_1646.8317n	1	#8102	2	60.8247	1646.83	7.0056	NFILDQTNVSAAAQR		Q8VEK3	HNRPU_MOUSE Heterogeneous nuclear ribonucleoprotein U OS=Mus musculus OX=10090 GN=Hnrnpu PE=1 SV=1
60.29_1646.8337n	1	#27989	2	60.2936	1646.83	6.8907	NFILDQTNVSAAAQR		Q8VEK3	HNRPU_MOUSE Heterogeneous nuclear ribonucleoprotein U OS=Mus musculus OX=10090 GN=Hnrnpu PE=1 SV=1
41.64_1696.7731n	1	#112577	3	41.6405	1696.77	5.5884	GYFEYIEENKYSR		Q8VEK3	HNRPU_MOUSE Heterogeneous nuclear ribonucleoprotein U OS=Mus musculus OX=10090 GN=Hnrnpu PE=1 SV=1
74.62_1713.9018n	1	#5767	2	74.6222	1713.9	7.0712	SSGPTSLFAVTVAPPGAR		Q8VEK3	HNRPU_MOUSE Heterogeneous nuclear ribonucleoprotein U OS=Mus musculus OX=10090 GN=Hnrnpu PE=1 SV=1
55.86_2186.0771n	2	#76659,#19514	2,3	55.8619	2186.08	6.8095	HAAENPGKYNILGTNTIMDK		Q8VEK3	HNRPU_MOUSE Heterogeneous nuclear ribonucleoprotein U OS=Mus musculus OX=10090 GN=Hnrnpu PE=1 SV=1
88.24_2798.2215n	1	#42123	3	88.2431	2798.22	5.8109	FDENDVITCFANFETDEVELSYAK		Q8VEK3	HNRPU_MOUSE Heterogeneous nuclear ribonucleoprotein U OS=Mus musculus OX=10090 GN=Hnrnpu PE=1 SV=1
65.31_3657.6155n	1	#11092	4	65.3101	3657.62	6.2764	NQSQGYNQWQQGQFWGQKPWSQHYHQGYY		Q8VEK3	HNRPU_MOUSE Heterogeneous nuclear ribonucleoprotein U OS=Mus musculus OX=10090 GN=Hnrnpu PE=1 SV=1
51.25_849.3571n	1	#60852	1	51.2511	849.357	5.6109	GSVNMDLD		Q61699	HS105_MOUSE Heat shock protein 105 kDa OS=Mus musculus OX=10090 GN=Hsph1 PE=1 SV=2
41.52_1027.5291n	1	#18067	2	41.5204	1027.53	7.1488	SLDQDPVVR		Q61699	HS105_MOUSE Heat shock protein 105 kDa OS=Mus musculus OX=10090 GN=Hsph1 PE=1 SV=2
47.53_1338.7149n	2	#112,#47	2,3	47.5269	1338.71	5.1895	ALLRLHQECEK		Q61699	HS105_MOUSE Heat shock protein 105 kDa OS=Mus musculus OX=10090 GN=Hsph1 PE=1 SV=2
68.18_1420.7216n	1	#43554	2	68.1787	1420.72	6.0465	GCALQCAILSPAFK		Q61699	HS105_MOUSE Heat shock protein 105 kDa OS=Mus musculus OX=10090 GN=Hsph1 PE=1 SV=2
67.04_1478.7051n	1	#7147	2	67.0384	1478.71	6.5204	AGGIETIANEFSDR		Q61699	HS105_MOUSE Heat shock protein 105 kDa OS=Mus musculus OX=10090 GN=Hsph1 PE=1 SV=2
39.37_1687.8249n	1	#119642	2	39.3698	1687.82	7.4338	NQQITHANNTVSSFK		Q61699	HS105_MOUSE Heat shock protein 105 kDa OS=Mus musculus OX=10090 GN=Hsph1 PE=1 SV=2
39.52_1687.8281n	1	#97101	3	39.5243	1687.83	6.4023	NQQITHANNTVSSFK		Q61699	HS105_MOUSE Heat shock protein 105 kDa OS=Mus musculus OX=10090 GN=Hsph1 PE=1 SV=2
39.37_1687.8294n	1	#58775	3	39.3698	1687.83	7.4338	NQQITHANNTVSSFK		Q61699	HS105_MOUSE Heat shock protein 105 kDa OS=Mus musculus OX=10090 GN=Hsph1 PE=1 SV=2
49.89_1793.8806n	1	#93963	2	49.8943	1793.88	6.5053	ELNNVCEPVVTQPKPK		Q61699	HS105_MOUSE Heat shock protein 105 kDa OS=Mus musculus OX=10090 GN=Hsph1 PE=1 SV=2
49.99_1793.9343n	1	#54969	3	49.9916	1793.93	6.5053	ELNNVCEPVVTQPKPK		Q61699	HS105_MOUSE Heat shock protein 105 kDa OS=Mus musculus OX=10090 GN=Hsph1 PE=1 SV=2
35.96_1843.9255n	1	#110036	4	35.9611	1843.93	6.0564	NQQITHANNTVSSFKR		Q61699	HS105_MOUSE Heat shock protein 105 kDa OS=Mus musculus OX=10090 GN=Hsph1 PE=1 SV=2
35.94_1843.9257n	1	#177680	3	35.9439	1843.93	6.0564	NQQITHANNTVSSFKR		Q61699	HS105_MOUSE Heat shock protein 105 kDa OS=Mus musculus OX=10090 GN=Hsph1 PE=1 SV=2
36.49_1843.9269n	1	#174632	3	36.4872	1843.93	6.1596	NQQITHANNTVSSFKR		Q61699	HS105_MOUSE Heat shock protein 105 kDa OS=Mus musculus OX=10090 GN=Hsph1 PE=1 SV=2
36.97_1843.9276n	2	#82211,#45316	3,4	36.9733	1843.93	6.7922	NQQITHANNTVSSFKR		Q61699	HS105_MOUSE Heat shock protein 105 kDa OS=Mus musculus OX=10090 GN=Hsph1 PE=1 SV=2
47.58_2021.0742n	1	#52479	4	47.5784	2021.07	6.8863	VKELNNVCEPVVTQPKPK		Q61699	HS105_MOUSE Heat shock protein 105 kDa OS=Mus musculus OX=10090 GN=Hsph1 PE=1 SV=2
47.51_2021.0833n	1	#163270	2	47.5097	2021.08	6.1704	VKELNNVCEPVVTQPKPK		Q61699	HS105_MOUSE Heat shock protein 105 kDa OS=Mus musculus OX=10090 GN=Hsph1 PE=1 SV=2
54.25_2057.0407n	1	#156879	3	54.2483	2057.04	5.8725	FQEAEERPKVLEELGQR		Q61699	HS105_MOUSE Heat shock protein 105 kDa OS=Mus musculus OX=10090 GN=Hsph1 PE=1 SV=2
55.95_1486.6976n	1	#1632	2	55.9456	1486.7	8.3086	TTPSYVAFTDTER		P17879	HS71B_MOUSE Heat shock 70 kDa protein 1B OS=Mus musculus OX=10090 GN=Hspa1b PE=1 SV=3
75.43_2155.0820n	2	#53006,#12191	2,3	75.4287	2155.08	7.1438	TTPSYVAFTDTERLIGDAAK		P17879	HS71B_MOUSE Heat shock 70 kDa protein 1B OS=Mus musculus OX=10090 GN=Hspa1b PE=1 SV=3
74.51_3226.5799n	1	#25330	4	74.5057	3226.58	6.4608	EELERVCSPIISGLYQGAGAPGAGGFGAQAPPK		P17879	HS71B_MOUSE Heat shock 70 kDa protein 1B OS=Mus musculus OX=10090 GN=Hspa1b PE=1 SV=3
55.78_516.2928n	1	#48388	1	55.7805	516.293	0	ELQK		P48722	HS74L_MOUSE Heat shock 70 kDa protein 4L OS=Mus musculus OX=10090 GN=Hspa4l PE=1 SV=2
55.78_1158.6678n	1	#55550	3	55.7805	1158.67	6.2094	IRLPYELQK		P48722	HS74L_MOUSE Heat shock 70 kDa protein 4L OS=Mus musculus OX=10090 GN=Hspa4l PE=1 SV=2
55.78_1158.6689n	1	#9260	2	55.7805	1158.67	6.2094	IRLPYELQK		P48722	HS74L_MOUSE Heat shock 70 kDa protein 4L OS=Mus musculus OX=10090 GN=Hspa4l PE=1 SV=2
54.25_1305.6238n	1	#5806	2	54.2483	1305.62	6.9156	SFDDPIVQTER		P48722	HS74L_MOUSE Heat shock 70 kDa protein 4L OS=Mus musculus OX=10090 GN=Hspa4l PE=1 SV=2
53.59_2119.0820n	1	#27778	3	53.5868	2119.08	5.5728	SKELDNFCNPIVYKPKPK		P48722	HS74L_MOUSE Heat shock 70 kDa protein 4L OS=Mus musculus OX=10090 GN=Hspa4l PE=1 SV=2
46.95_729.4371n	1	#58450	2	46.9492	729.437	7.1434	LSELLR		P07901	HS90A_MOUSE Heat shock protein HSP 90-alpha OS=Mus musculus OX=10090 GN=Hsp90aa1 PE=1 SV=4
44.28_947.4477n	1	#133933	2	44.2831	947.448	6.3145	FYEQFSK		P07901	HS90A_MOUSE Heat shock protein HSP 90-alpha OS=Mus musculus OX=10090 GN=Hsp90aa1 PE=1 SV=4
39.34_1150.5550n	1	#3908	2	39.3355	1150.56	7.5768	YIDQEELNK		P07901	HS90A_MOUSE Heat shock protein HSP 90-alpha OS=Mus musculus OX=10090 GN=Hsp90aa1 PE=1 SV=4
39.61_1150.5562n	1	#810	2	39.6101	1150.56	7.4285	YIDQEELNK		P07901	HS90A_MOUSE Heat shock protein HSP 90-alpha OS=Mus musculus OX=10090 GN=Hsp90aa1 PE=1 SV=4
[truncated: 2,662 more rows]

## Sheet: lysate peptides
Supplemental Material 1: all peptides list (LCMSMS)_lysate peptides
						Best identification
Peptide identifier	Ions	Deconvoluted peptide ions	Deconvoluted charges	Retention time (min)	Neutral mass	Score	Sequence	Modifications	Accession	Description
48.38_614.3508n	1	#48022	2	48.3774	614.351	6.7244	NVVGAR		Q9CQV8	1433B_MOUSE 14-3-3 protein beta/alpha OS=Mus musculus GN=Ywhab PE=1 SV=3
30.51_815.4127n	1	#44075	2	30.511	815.413	8.4204	LAEQAER		Q9CQV8	1433B_MOUSE 14-3-3 protein beta/alpha OS=Mus musculus GN=Ywhab PE=1 SV=3
41.31_902.5046n	1	#374	2	41.3125	902.505	9.2591	VISSIEQK		Q9CQV8	1433B_MOUSE 14-3-3 protein beta/alpha OS=Mus musculus GN=Ywhab PE=1 SV=3
65.12_906.5177n	1	#177	2	65.1151	906.518	9.605	NLLSVAYK		Q9CQV8	1433B_MOUSE 14-3-3 protein beta/alpha OS=Mus musculus GN=Ywhab PE=1 SV=3
72.25_907.4968n	1	#44554	2	72.2502	907.497	8.6956	NLLSVAYK	[1] Deamidation N	Q9CQV8	1433B_MOUSE 14-3-3 protein beta/alpha OS=Mus musculus GN=Ywhab PE=1 SV=3
44.20_915.4297n	1	#3905	2	44.1957	915.43	7.7961	MKGDYFR		Q9CQV8	1433B_MOUSE 14-3-3 protein beta/alpha OS=Mus musculus GN=Ywhab PE=1 SV=3
50.51_1014.4171n	1	#487	2	50.5111	1014.42	9.589	YDDMAAAMK		Q9CQV8	1433B_MOUSE 14-3-3 protein beta/alpha OS=Mus musculus GN=Ywhab PE=1 SV=3
75.36_1096.4894n	1	#46581	2	75.3576	1096.49	7.6425	QQMGKEYR	[1] Deamidation Q|[2] Deamidation Q	Q9CQV8	1433B_MOUSE 14-3-3 protein beta/alpha OS=Mus musculus GN=Ywhab PE=1 SV=3
75.32_1096.4929n	1	#13513	2	75.3232	1096.49	7.6425	QQMGKEYR	[1] Deamidation Q|[2] Deamidation Q	Q9CQV8	1433B_MOUSE 14-3-3 protein beta/alpha OS=Mus musculus GN=Ywhab PE=1 SV=3
38.96_1107.5515n	2	#546,#14063	2,3	38.9585	1107.55	9.3549	EMQPTHPIR		Q9CQV8	1433B_MOUSE 14-3-3 protein beta/alpha OS=Mus musculus GN=Ywhab PE=1 SV=3
95.68_1188.6545n	1	#1156	2	95.6821	1188.65	9.3841	DSTLIMQLLR		Q9CQV8	1433B_MOUSE 14-3-3 protein beta/alpha OS=Mus musculus GN=Ywhab PE=1 SV=3
44.61_1195.5774n	1	#1228	2	44.6076	1195.58	9.0084	YLSEVASGENK		Q9CQV8	1433B_MOUSE 14-3-3 protein beta/alpha OS=Mus musculus GN=Ywhab PE=1 SV=3
34.49_1235.6373n	1	#99964	2	34.488	1235.64	9.0448	KEMQPTHPIR		Q9CQV8	1433B_MOUSE 14-3-3 protein beta/alpha OS=Mus musculus GN=Ywhab PE=1 SV=3
34.71_1235.6406n	1	#58728	2	34.711	1235.64	8.9014	KEMQPTHPIR		Q9CQV8	1433B_MOUSE 14-3-3 protein beta/alpha OS=Mus musculus GN=Ywhab PE=1 SV=3
35.03_1235.6418n	1	#46667	2	35.0316	1235.64	8.8634	KEMQPTHPIR		Q9CQV8	1433B_MOUSE 14-3-3 protein beta/alpha OS=Mus musculus GN=Ywhab PE=1 SV=3
34.56_1235.6461n	1	#13340	3	34.5566	1235.65	9.0448	KEMQPTHPIR		Q9CQV8	1433B_MOUSE 14-3-3 protein beta/alpha OS=Mus musculus GN=Ywhab PE=1 SV=3
34.98_1235.6461n	1	#6368	3	34.9801	1235.65	8.9809	KEMQPTHPIR		Q9CQV8	1433B_MOUSE 14-3-3 protein beta/alpha OS=Mus musculus GN=Ywhab PE=1 SV=3
41.31_1288.6941n	1	#36334	3	41.3125	1288.69	8.6203	VISSIEQKTER		Q9CQV8	1433B_MOUSE 14-3-3 protein beta/alpha OS=Mus musculus GN=Ywhab PE=1 SV=3
78.28_1502.8268n	1	#26565	2	78.2753	1502.83	8.849	NLLSVAYKNVVGAR		Q9CQV8	1433B_MOUSE 14-3-3 protein beta/alpha OS=Mus musculus GN=Ywhab PE=1 SV=3
78.43_1502.8351n	1	#32120	2	78.4297	1502.84	8.4989	NLLSVAYKNVVGAR		Q9CQV8	1433B_MOUSE 14-3-3 protein beta/alpha OS=Mus musculus GN=Ywhab PE=1 SV=3
78.33_1502.8362n	1	#30798	2	78.3268	1502.84	7.8882	NLLSVAYKNVVGAR		Q9CQV8	1433B_MOUSE 14-3-3 protein beta/alpha OS=Mus musculus GN=Ywhab PE=1 SV=3
78.36_1502.8553n	1	#60848	3	78.3611	1502.86	8.849	NLLSVAYKNVVGAR		Q9CQV8	1433B_MOUSE 14-3-3 protein beta/alpha OS=Mus musculus GN=Ywhab PE=1 SV=3
38.53_1597.7370n	2	#1676,#831	2,3	38.5324	1597.74	9.4153	AVTEQGHELSNEER		Q9CQV8	1433B_MOUSE 14-3-3 protein beta/alpha OS=Mus musculus GN=Ywhab PE=1 SV=3
43.41_1640.7330n	1	#36421	2	43.412	1640.73	7.1472	AVTEQGHELSNEER	[N-term] Acetyl N-TERM|[5] Deamidation Q	Q9CQV8	1433B_MOUSE 14-3-3 protein beta/alpha OS=Mus musculus GN=Ywhab PE=1 SV=3
59.70_1811.8257n	2	#627,#225	2,3	59.701	1811.83	9.6257	LAEQAERYDDMAAAMK		Q9CQV8	1433B_MOUSE 14-3-3 protein beta/alpha OS=Mus musculus GN=Ywhab PE=1 SV=3
59.11_1811.9323n	1	#4242	2	59.1089	1811.93	9.6257	LAEQAERYDDMAAAMK		Q9CQV8	1433B_MOUSE 14-3-3 protein beta/alpha OS=Mus musculus GN=Ywhab PE=1 SV=3
75.27_1833.8628n	1	#97069	2	75.2717	1833.86	6.6251	GDYFRYLSEVASGENK		Q9CQV8	1433B_MOUSE 14-3-3 protein beta/alpha OS=Mus musculus GN=Ywhab PE=1 SV=3
97.40_2157.9964n	1	#23344	2	97.4037	2158	8.9381	TAFDEAIAELDTLNEESYK		Q9CQV8	1433B_MOUSE 14-3-3 protein beta/alpha OS=Mus musculus GN=Ywhab PE=1 SV=3
67.46_2158.0160n	1	#9561	2	67.4557	2158.02	9.4591	QTTVSNSQQAYQEAFEISK		Q9CQV8	1433B_MOUSE 14-3-3 protein beta/alpha OS=Mus musculus GN=Ywhab PE=1 SV=3
67.75_2158.0166n	1	#9544	2	67.7474	2158.02	9.4095	QTTVSNSQQAYQEAFEISK		Q9CQV8	1433B_MOUSE 14-3-3 protein beta/alpha OS=Mus musculus GN=Ywhab PE=1 SV=3
67.15_2158.0265n	1	#39330	3	67.1463	2158.03	9.4591	QTTVSNSQQAYQEAFEISK		Q9CQV8	1433B_MOUSE 14-3-3 protein beta/alpha OS=Mus musculus GN=Ywhab PE=1 SV=3
69.61_2159.0004n	1	#70728	2	69.6074	2159	8.0326	QTTVSNSQQAYQEAFEISK	[12] Deamidation Q	Q9CQV8	1433B_MOUSE 14-3-3 protein beta/alpha OS=Mus musculus GN=Ywhab PE=1 SV=3
68.82_2159.0045n	1	#67736	2	68.8238	2159	8.3779	QTTVSNSQQAYQEAFEISK	[8] Deamidation Q	Q9CQV8	1433B_MOUSE 14-3-3 protein beta/alpha OS=Mus musculus GN=Ywhab PE=1 SV=3
63.39_2286.1223n	1	#1834	3	63.3934	2286.12	9.0448	QTTVSNSQQAYQEAFEISKK		Q9CQV8	1433B_MOUSE 14-3-3 protein beta/alpha OS=Mus musculus GN=Ywhab PE=1 SV=3
71.17_2486.2491n	2	#16303,#11601	3,4	71.1746	2486.25	8.2618	AVTEQGHELSNEERNLLSVAYK		Q9CQV8	1433B_MOUSE 14-3-3 protein beta/alpha OS=Mus musculus GN=Ywhab PE=1 SV=3
69.88_3335.5834n	1	#36500	3	69.882	3335.58	8.2063	YLSEVASGENKQTTVSNSQQAYQEAFEISK		Q9CQV8	1433B_MOUSE 14-3-3 protein beta/alpha OS=Mus musculus GN=Ywhab PE=1 SV=3
49.11_628.3632n	1	#118450	2	49.1096	628.363	7.7466	NVIGAR		P62259	1433E_MOUSE 14-3-3 protein epsilon OS=Mus musculus GN=Ywhae PE=1 SV=1
51.05_718.3708n	1	#6497	2	51.0546	718.371	8.8519	VFYYK		P62259	1433E_MOUSE 14-3-3 protein epsilon OS=Mus musculus GN=Ywhae PE=1 SV=1
30.51_815.4127n	1	#44075	2	30.511	815.413	8.4204	LAEQAER		P62259	1433E_MOUSE 14-3-3 protein epsilon OS=Mus musculus GN=Ywhae PE=1 SV=1
65.12_906.5177n	1	#177	2	65.1151	906.518	9.605	NLLSVAYK		P62259	1433E_MOUSE 14-3-3 protein epsilon OS=Mus musculus GN=Ywhae PE=1 SV=1
72.25_907.4968n	1	#44554	2	72.2502	907.497	8.6956	NLLSVAYK	[1] Deamidation N	P62259	1433E_MOUSE 14-3-3 protein epsilon OS=Mus musculus GN=Ywhae PE=1 SV=1
52.03_964.4755n	1	#67518	2	52.0271	964.475	6.6438	EDLVYQAK		P62259	1433E_MOUSE 14-3-3 protein epsilon OS=Mus musculus GN=Ywhae PE=1 SV=1
49.06_976.4917n	1	#843	2	49.0581	976.492	9.2087	QMVETELK		P62259	1433E_MOUSE 14-3-3 protein epsilon OS=Mus musculus GN=Ywhae PE=1 SV=1
49.32_976.5330n	1	#33371	2	49.3156	976.533	9.0777	QMVETELK		P62259	1433E_MOUSE 14-3-3 protein epsilon OS=Mus musculus GN=Ywhae PE=1 SV=1
53.36_1107.5316n	1	#2375	2	53.3599	1107.53	0	AEFATGNDRK		P62259	1433E_MOUSE 14-3-3 protein epsilon OS=Mus musculus GN=Ywhae PE=1 SV=1
55.05_1146.4669n	1	#58636	2	55.0474	1146.47	6.3348	YDEMVESMK	[8] Oxidation M	P62259	1433E_MOUSE 14-3-3 protein epsilon OS=Mus musculus GN=Ywhae PE=1 SV=1
54.44_1146.4676n	1	#31529	2	54.4354	1146.47	7.202	YDEMVESMK	[8] Oxidation M	P62259	1433E_MOUSE 14-3-3 protein epsilon OS=Mus musculus GN=Ywhae PE=1 SV=1
95.68_1188.6545n	1	#1156	2	95.6821	1188.65	9.3841	DSTLIMQLLR		P62259	1433E_MOUSE 14-3-3 protein epsilon OS=Mus musculus GN=Ywhae PE=1 SV=1
53.02_1193.5679n	1	#134709	2	53.0167	1193.57	9.2785	EAAENSLVAYK		P62259	1433E_MOUSE 14-3-3 protein epsilon OS=Mus musculus GN=Ywhae PE=1 SV=1
52.98_1193.5960n	1	#311	2	52.9824	1193.6	9.4081	EAAENSLVAYK		P62259	1433E_MOUSE 14-3-3 protein epsilon OS=Mus musculus GN=Ywhae PE=1 SV=1
42.66_1236.6414n	1	#1924	2	42.6626	1236.64	9.02	HLIPAANTGESK		P62259	1433E_MOUSE 14-3-3 protein epsilon OS=Mus musculus GN=Ywhae PE=1 SV=1
59.69_1255.5896n	1	#3248	2	59.6924	1255.59	8.5241	YLAEFATGNDR		P62259	1433E_MOUSE 14-3-3 protein epsilon OS=Mus musculus GN=Ywhae PE=1 SV=1
46.79_1258.5625n	2	#3853,#4552	2,3	46.7928	1258.56	9.0241	YDEMVESMKK		P62259	1433E_MOUSE 14-3-3 protein epsilon OS=Mus musculus GN=Ywhae PE=1 SV=1
52.85_1288.5654n	1	#52506	2	52.8508	1288.57	6.9425	EALQDVEDENQ		P62259	1433E_MOUSE 14-3-3 protein epsilon OS=Mus musculus GN=Ywhae PE=1 SV=1
47.66_1321.6858n	1	#13006	2	47.6623	1321.69	8.4709	KEAAENSLVAYK		P62259	1433E_MOUSE 14-3-3 protein epsilon OS=Mus musculus GN=Ywhae PE=1 SV=1
53.29_1383.6839n	2	#977,#1335	2,3	53.2913	1383.68	9.2829	YLAEFATGNDRK		P62259	1433E_MOUSE 14-3-3 protein epsilon OS=Mus musculus GN=Ywhae PE=1 SV=1
55.84_1384.6638n	1	#15224	3	55.8369	1384.66	8.6612	YLAEFATGNDRK	[9] Deamidation N	P62259	1433E_MOUSE 14-3-3 protein epsilon OS=Mus musculus GN=Ywhae PE=1 SV=1
55.68_1384.6684n	1	#9040	2	55.6825	1384.67	8.6612	YLAEFATGNDRK	[9] Deamidation N	P62259	1433E_MOUSE 14-3-3 protein epsilon OS=Mus musculus GN=Ywhae PE=1 SV=1
42.47_1416.7260n	2	#15290,#12213	2,3	42.4652	1416.73	8.4716	IISSIEQKEENK		P62259	1433E_MOUSE 14-3-3 protein epsilon OS=Mus musculus GN=Ywhae PE=1 SV=1
58.48_1416.7634n	1	#35228	2	58.4797	1416.76	7.4268	ASWRIISSIEQK		P62259	1433E_MOUSE 14-3-3 protein epsilon OS=Mus musculus GN=Ywhae PE=1 SV=1
93.19_1475.7476n	1	#5289	2	93.1884	1475.75	8.7849	LICCDILDVLDK	[3] Carbamidomethyl C|[4] Carbamidomethyl C	P62259	1433E_MOUSE 14-3-3 protein epsilon OS=Mus musculus GN=Ywhae PE=1 SV=1
61.74_1523.6970n	1	#117	2	61.7403	1523.7	9.0943	MDDREDLVYQAK	[N-term] Acetyl N-TERM	P62259	1433E_MOUSE 14-3-3 protein epsilon OS=Mus musculus GN=Ywhae PE=1 SV=1
53.87_1539.6920n	1	#9348	2	53.8748	1539.69	8.6761	MDDREDLVYQAK	[N-term] Acetyl N-TERM|[1] Oxidation M	P62259	1433E_MOUSE 14-3-3 protein epsilon OS=Mus musculus GN=Ywhae PE=1 SV=1
65.10_1574.7811n	1	#294	2	65.098	1574.78	7.4322	KVAGMDVELTVEER		P62259	1433E_MOUSE 14-3-3 protein epsilon OS=Mus musculus GN=Ywhae PE=1 SV=1
65.60_1616.8204n	1	#1229	2	65.5957	1616.82	7.5451	KVAGMDVELTVEER	[N-term] Acetyl N-TERM	P62259	1433E_MOUSE 14-3-3 protein epsilon OS=Mus musculus GN=Ywhae PE=1 SV=1
64.05_1818.8822n	3	#1248,#287,#544	2,3,4	64.0456	1818.88	8.4314	AASDIAMTELPPTHPIR		P62259	1433E_MOUSE 14-3-3 protein epsilon OS=Mus musculus GN=Ywhae PE=1 SV=1
66.34_1818.9243n	1	#1807	3	66.345	1818.92	8.4314	AASDIAMTELPPTHPIR		P62259	1433E_MOUSE 14-3-3 protein epsilon OS=Mus musculus GN=Ywhae PE=1 SV=1
66.71_1927.8735n	2	#3567,#1479	2,3	66.7053	1927.87	9.2205	LAEQAERYDEMVESMK		P62259	1433E_MOUSE 14-3-3 protein epsilon OS=Mus musculus GN=Ywhae PE=1 SV=1
72.93_1936.9549n	1	#11127	3	72.9321	1936.95	6.8771	HLIPAANTGESKVFYYK		P62259	1433E_MOUSE 14-3-3 protein epsilon OS=Mus musculus GN=Ywhae PE=1 SV=1
97.49_2086.9530n	1	#62647	3	97.4895	2086.95	8.9693	AAFDDAIAELDTLSEESYK		P62259	1433E_MOUSE 14-3-3 protein epsilon OS=Mus musculus GN=Ywhae PE=1 SV=1
97.42_2086.9554n	1	#36198	2	97.4209	2086.96	8.9437	AAFDDAIAELDTLSEESYK		P62259	1433E_MOUSE 14-3-3 protein epsilon OS=Mus musculus GN=Ywhae PE=1 SV=1
97.90_2086.9602n	1	#7307	2	97.8956	2086.96	9.0249	AAFDDAIAELDTLSEESYK		P62259	1433E_MOUSE 14-3-3 protein epsilon OS=Mus musculus GN=Ywhae PE=1 SV=1
75.27_2179.9311n	1	#79206	2	75.2717	2179.93	8.0872	DNLTLWTSDMQGDGEEQNK		P62259	1433E_MOUSE 14-3-3 protein epsilon OS=Mus musculus GN=Ywhae PE=1 SV=1
74.91_2179.9458n	1	#72042	2	74.9113	2179.95	8.4466	DNLTLWTSDMQGDGEEQNK		P62259	1433E_MOUSE 14-3-3 protein epsilon OS=Mus musculus GN=Ywhae PE=1 SV=1
95.88_2694.3826n	1	#39562	4	95.8823	2694.38	7.4966	LICCDILDVLDKHLIPAANTGESK	[3] Carbamidomethyl C|[4] Carbamidomethyl C	P62259	1433E_MOUSE 14-3-3 protein epsilon OS=Mus musculus GN=Ywhae PE=1 SV=1
96.40_2694.3877n	1	#11034	4	96.3971	2694.39	8.238	LICCDILDVLDKHLIPAANTGESK	[3] Carbamidomethyl C|[4] Carbamidomethyl C	P62259	1433E_MOUSE 14-3-3 protein epsilon OS=Mus musculus GN=Ywhae PE=1 SV=1
96.83_2694.3895n	1	#10224	4	96.826	2694.39	8.4725	LICCDILDVLDKHLIPAANTGESK	[3] Carbamidomethyl C|[4] Carbamidomethyl C	P62259	1433E_MOUSE 14-3-3 protein epsilon OS=Mus musculus GN=Ywhae PE=1 SV=1
64.04_3258.5727n	1	#107854	5	64.0398	3258.57	6.727	AAFDDAIAELDTLSEESYKDSTLIMQLLR	[26] Deamidation Q	P62259	1433E_MOUSE 14-3-3 protein epsilon OS=Mus musculus GN=Ywhae PE=1 SV=1
48.38_614.3508n	1	#48022	2	48.3774	614.351	6.7244	NVVGAR		P68510	1433F_MOUSE 14-3-3 protein eta OS=Mus musculus GN=Ywhah PE=1 SV=2
36.12_800.3871n	1	#19324	2	36.1242	800.387	0	KGDYYR		P68510	1433F_MOUSE 14-3-3 protein eta OS=Mus musculus GN=Ywhah PE=1 SV=2
30.51_815.4127n	1	#44075	2	30.511	815.413	8.4204	LAEQAER		P68510	1433F_MOUSE 14-3-3 protein eta OS=Mus musculus GN=Ywhah PE=1 SV=2
41.31_902.5046n	1	#374	2	41.3125	902.505	9.2591	VISSIEQK		P68510	1433F_MOUSE 14-3-3 protein eta OS=Mus musculus GN=Ywhah PE=1 SV=2
65.12_906.5177n	1	#177	2	65.1151	906.518	9.605	NLLSVAYK		P68510	1433F_MOUSE 14-3-3 protein eta OS=Mus musculus GN=Ywhah PE=1 SV=2
72.25_907.4968n	1	#44554	2	72.2502	907.497	8.6956	NLLSVAYK	[1] Deamidation N	P68510	1433F_MOUSE 14-3-3 protein eta OS=Mus musculus GN=Ywhah PE=1 SV=2
36.18_931.4218n	1	#2035	2	36.1756	931.422	8.3856	MKGDYYR		P68510	1433F_MOUSE 14-3-3 protein eta OS=Mus musculus GN=Ywhah PE=1 SV=2
48.63_1030.4111n	1	#4162	2	48.6348	1030.41	8.9708	YDDMASAMK		P68510	1433F_MOUSE 14-3-3 protein eta OS=Mus musculus GN=Ywhah PE=1 SV=2
47.68_1065.5290n	1	#4374	2	47.6795	1065.53	8.6825	YLAEVASGEK		P68510	1433F_MOUSE 14-3-3 protein eta OS=Mus musculus GN=Ywhah PE=1 SV=2
95.68_1188.6545n	1	#1156	2	95.6821	1188.65	9.3841	DSTLIMQLLR		P68510	1433F_MOUSE 14-3-3 protein eta OS=Mus musculus GN=Ywhah PE=1 SV=2
42.22_1193.6291n	1	#2834	2	42.2164	1193.63	8.6896	YLAEVASGEKK		P68510	1433F_MOUSE 14-3-3 protein eta OS=Mus musculus GN=Ywhah PE=1 SV=2
35.62_1244.6098n	1	#17636	2	35.6151	1244.61	9.2393	EHMQPTHPIR		P68510	1433F_MOUSE 14-3-3 protein eta OS=Mus musculus GN=Ywhah PE=1 SV=2
35.60_1244.6110n	1	#3419	3	35.5979	1244.61	9.2393	EHMQPTHPIR		P68510	1433F_MOUSE 14-3-3 protein eta OS=Mus musculus GN=Ywhah PE=1 SV=2
35.87_1244.6121n	1	#6249	3	35.8725	1244.61	9.0896	EHMQPTHPIR		P68510	1433F_MOUSE 14-3-3 protein eta OS=Mus musculus GN=Ywhah PE=1 SV=2
47.92_1245.5958n	1	#15804	2	47.9198	1245.6	7.2592	EHMQPTHPIR	[4] Deamidation Q	P68510	1433F_MOUSE 14-3-3 protein eta OS=Mus musculus GN=Ywhah PE=1 SV=2
47.85_1245.5983n	1	#5422	2	47.8511	1245.6	7.2592	EHMQPTHPIR	[4] Deamidation Q	P68510	1433F_MOUSE 14-3-3 protein eta OS=Mus musculus GN=Ywhah PE=1 SV=2
44.33_1303.5146n	1	#16284	2	44.333	1303.51	8.4862	NCNDFQYESK	[2] Carbamidomethyl C	P68510	1433F_MOUSE 14-3-3 protein eta OS=Mus musculus GN=Ywhah PE=1 SV=2
45.79_1394.6997n	1	#18885	2	45.786	1394.7	8.1133	KNSVVEASEAAYK		P68510	1433F_MOUSE 14-3-3 protein eta OS=Mus musculus GN=Ywhah PE=1 SV=2
78.28_1502.8268n	1	#26565	2	78.2753	1502.83	8.849	NLLSVAYKNVVGAR		P68510	1433F_MOUSE 14-3-3 protein eta OS=Mus musculus GN=Ywhah PE=1 SV=2
78.43_1502.8351n	1	#32120	2	78.4297	1502.84	8.4989	NLLSVAYKNVVGAR		P68510	1433F_MOUSE 14-3-3 protein eta OS=Mus musculus GN=Ywhah PE=1 SV=2
78.33_1502.8362n	1	#30798	2	78.3268	1502.84	7.8882	NLLSVAYKNVVGAR		P68510	1433F_MOUSE 14-3-3 protein eta OS=Mus musculus GN=Ywhah PE=1 SV=2
78.36_1502.8553n	1	#60848	3	78.3611	1502.86	8.849	NLLSVAYKNVVGAR		P68510	1433F_MOUSE 14-3-3 protein eta OS=Mus musculus GN=Ywhah PE=1 SV=2
57.32_1585.7597n	1	#4567	2	57.3185	1585.76	8.8373	AVTELNEPLSNEDR		P68510	1433F_MOUSE 14-3-3 protein eta OS=Mus musculus GN=Ywhah PE=1 SV=2
56.76_1585.7632n	1	#2637	2	56.7579	1585.76	8.7724	AVTELNEPLSNEDR		P68510	1433F_MOUSE 14-3-3 protein eta OS=Mus musculus GN=Ywhah PE=1 SV=2
79.42_1586.7923n	1	#19789	2	79.4193	1586.79	6.1138	AVTELNEPLSNEDR	[6] Deamidation N	P68510	1433F_MOUSE 14-3-3 protein eta OS=Mus musculus GN=Ywhah PE=1 SV=2
99.31_1730.8661n	1	#17707	2	99.314	1730.87	8.3963	ELETVCNDVLALLDK	[6] Carbamidomethyl C	P68510	1433F_MOUSE 14-3-3 protein eta OS=Mus musculus GN=Ywhah PE=1 SV=2
69.47_1804.8814n	1	#41172	2	69.4701	1804.88	6.892	FLIKNCNDFQYESK	[6] Carbamidomethyl C	P68510	1433F_MOUSE 14-3-3 protein eta OS=Mus musculus GN=Ywhah PE=1 SV=2
58.10_1827.8143n	1	#1862	2	58.1022	1827.81	8.4952	LAEQAERYDDMASAMK		P68510	1433F_MOUSE 14-3-3 protein eta OS=Mus musculus GN=Ywhah PE=1 SV=2
59.61_1827.8185n	1	#48842	2	59.6066	1827.82	7.519	LAEQAERYDDMASAMK		P68510	1433F_MOUSE 14-3-3 protein eta OS=Mus musculus GN=Ywhah PE=1 SV=2
83.39_2071.0174n	2	#20451,#5441	2,3	83.3875	2071.02	8.5297	NSVVEASEAAYKEAFEISK		P68510	1433F_MOUSE 14-3-3 protein eta OS=Mus musculus GN=Ywhah PE=1 SV=2
97.32_2101.0674n	1	#38524	2	97.3179	2101.07	6.9014	IEKELETVCNDVLALLDK	[9] Carbamidomethyl C	P68510	1433F_MOUSE 14-3-3 protein eta OS=Mus musculus GN=Ywhah PE=1 SV=2
91.24_2101.0755n	1	#31867	2	91.2438	2101.08	6.8565	IEKELETVCNDVLALLDK	[9] Carbamidomethyl C	P68510	1433F_MOUSE 14-3-3 protein eta OS=Mus musculus GN=Ywhah PE=1 SV=2
85.12_2101.0850n	2	#3864,#13890	2,3	85.1177	2101.08	7.225	IEKELETVCNDVLALLDK	[9] Carbamidomethyl C	P68510	1433F_MOUSE 14-3-3 protein eta OS=Mus musculus GN=Ywhah PE=1 SV=2
74.59_2120.8804n	1	#41162	2	74.591	2120.88	7.6504	DNLTLWTSDQQDEEAGEGN		P68510	1433F_MOUSE 14-3-3 protein eta OS=Mus musculus GN=Ywhah PE=1 SV=2
90.22_2156.9787n	1	#33103	2	90.2199	2156.98	8.2641	QAFDDAIAELDTLNEDSYK		P68510	1433F_MOUSE 14-3-3 protein eta OS=Mus musculus GN=Ywhah PE=1 SV=2
78.10_2474.2735n	1	#1193	3	78.1038	2474.27	8.6405	AVTELNEPLSNEDRNLLSVAYK		P68510	1433F_MOUSE 14-3-3 protein eta OS=Mus musculus GN=Ywhah PE=1 SV=2
48.38_614.3508n	1	#48022	2	48.3774	614.351	6.7244	NVVGAR		P61982	1433G_MOUSE 14-3-3 protein gamma OS=Mus musculus GN=Ywhag PE=1 SV=2
39.44_774.4388n	1	#8259	2	39.4362	774.439	7.9876	KIEMVR		P61982	1433G_MOUSE 14-3-3 protein gamma OS=Mus musculus GN=Ywhag PE=1 SV=2
40.27_774.4393n	1	#3349	2	40.2714	774.439	8.4904	KIEMVR		P61982	1433G_MOUSE 14-3-3 protein gamma OS=Mus musculus GN=Ywhag PE=1 SV=2
30.51_815.4127n	1	#44075	2	30.511	815.413	8.4204	LAEQAER		P61982	1433G_MOUSE 14-3-3 protein gamma OS=Mus musculus GN=Ywhag PE=1 SV=2
48.19_862.3711n	1	#37209	2	48.1886	862.371	7.0472	TSADGNEK	[N-term] Acetyl N-TERM	P61982	1433G_MOUSE 14-3-3 protein gamma OS=Mus musculus GN=Ywhag PE=1 SV=2
48.24_862.3889n	1	#49240	2	48.2401	862.389	7.0472	TSADGNEK	[N-term] Acetyl N-TERM	P61982	1433G_MOUSE 14-3-3 protein gamma OS=Mus musculus GN=Ywhag PE=1 SV=2
41.31_902.5046n	1	#374	2	41.3125	902.505	9.2591	VISSIEQK		P61982	1433G_MOUSE 14-3-3 protein gamma OS=Mus musculus GN=Ywhag PE=1 SV=2
65.12_906.5177n	1	#177	2	65.1151	906.518	9.605	NLLSVAYK		P61982	1433G_MOUSE 14-3-3 protein gamma OS=Mus musculus GN=Ywhag PE=1 SV=2
72.25_907.4968n	1	#44554	2	72.2502	907.497	8.6956	NLLSVAYK	[1] Deamidation N	P61982	1433G_MOUSE 14-3-3 protein gamma OS=Mus musculus GN=Ywhag PE=1 SV=2
36.18_931.4218n	1	#2035	2	36.1756	931.422	8.3856	MKGDYYR		P61982	1433G_MOUSE 14-3-3 protein gamma OS=Mus musculus GN=Ywhag PE=1 SV=2
50.51_1014.4171n	1	#487	2	50.5111	1014.42	9.589	YDDMAAAMK		P61982	1433G_MOUSE 14-3-3 protein gamma OS=Mus musculus GN=Ywhag PE=1 SV=2
35.82_1062.4967n	1	#20266	2	35.821	1062.5	0	YSEAHEISK		P61982	1433G_MOUSE 14-3-3 protein gamma OS=Mus musculus GN=Ywhag PE=1 SV=2
35.82_1133.5388n	2	#3044,#7308	2,3	35.821	1133.54	9.1096	AYSEAHEISK		P61982	1433G_MOUSE 14-3-3 protein gamma OS=Mus musculus GN=Ywhag PE=1 SV=2
95.68_1188.6545n	1	#1156	2	95.6821	1188.65	9.3841	DSTLIMQLLR		P61982	1433G_MOUSE 14-3-3 protein gamma OS=Mus musculus GN=Ywhag PE=1 SV=2
45.32_1235.6531n	2	#1044,#3049	2,3	45.3226	1235.65	9.4476	YLAEVATGEKR		P61982	1433G_MOUSE 14-3-3 protein gamma OS=Mus musculus GN=Ywhag PE=1 SV=2
43.27_1244.5931n	1	#72567	2	43.2747	1244.59	7.6785	MVDREQLVQK		P61982	1433G_MOUSE 14-3-3 protein gamma OS=Mus musculus GN=Ywhag PE=1 SV=2
35.62_1244.6098n	1	#17636	2	35.6151	1244.61	9.2393	EHMQPTHPIR		P61982	1433G_MOUSE 14-3-3 protein gamma OS=Mus musculus GN=Ywhag PE=1 SV=2
35.60_1244.6110n	1	#3419	3	35.5979	1244.61	9.2393	EHMQPTHPIR		P61982	1433G_MOUSE 14-3-3 protein gamma OS=Mus musculus GN=Ywhag PE=1 SV=2
35.87_1244.6121n	1	#6249	3	35.8725	1244.61	9.0896	EHMQPTHPIR		P61982	1433G_MOUSE 14-3-3 protein gamma OS=Mus musculus GN=Ywhag PE=1 SV=2
47.92_1245.5958n	1	#15804	2	47.9198	1245.6	7.2592	EHMQPTHPIR	[4] Deamidation Q	P61982	1433G_MOUSE 14-3-3 protein gamma OS=Mus musculus GN=Ywhag PE=1 SV=2
47.85_1245.5983n	1	#5422	2	47.8511	1245.6	7.2592	EHMQPTHPIR	[4] Deamidation Q	P61982	1433G_MOUSE 14-3-3 protein gamma OS=Mus musculus GN=Ywhag PE=1 SV=2
78.28_1502.8268n	1	#26565	2	78.2753	1502.83	8.849	NLLSVAYKNVVGAR		P61982	1433G_MOUSE 14-3-3 protein gamma OS=Mus musculus GN=Ywhag PE=1 SV=2
78.43_1502.8351n	1	#32120	2	78.4297	1502.84	8.4989	NLLSVAYKNVVGAR		P61982	1433G_MOUSE 14-3-3 protein gamma OS=Mus musculus GN=Ywhag PE=1 SV=2
78.33_1502.8362n	1	#30798	2	78.3268	1502.84	7.8882	NLLSVAYKNVVGAR		P61982	1433G_MOUSE 14-3-3 protein gamma OS=Mus musculus GN=Ywhag PE=1 SV=2
78.36_1502.8553n	1	#60848	3	78.3611	1502.86	8.849	NLLSVAYKNVVGAR		P61982	1433G_MOUSE 14-3-3 protein gamma OS=Mus musculus GN=Ywhag PE=1 SV=2
57.73_1642.7784n	1	#105912	2	57.7304	1642.78	9.5163	NVTELNEPLSNEER		P61982	1433G_MOUSE 14-3-3 protein gamma OS=Mus musculus GN=Ywhag PE=1 SV=2
57.61_1642.7833n	1	#199	2	57.6102	1642.78	9.5163	NVTELNEPLSNEER		P61982	1433G_MOUSE 14-3-3 protein gamma OS=Mus musculus GN=Ywhag PE=1 SV=2
65.66_1733.8348n	1	#30649	2	65.6643	1733.83	7.537	GDYYRYLAEVATGEK		P61982	1433G_MOUSE 14-3-3 protein gamma OS=Mus musculus GN=Ywhag PE=1 SV=2
59.70_1811.8257n	2	#627,#225	2,3	59.701	1811.83	9.6257	LAEQAERYDDMAAAMK		P61982	1433G_MOUSE 14-3-3 protein gamma OS=Mus musculus GN=Ywhag PE=1 SV=2
59.11_1811.9323n	1	#4242	2	59.1089	1811.93	9.6257	LAEQAERYDDMAAAMK		P61982	1433G_MOUSE 14-3-3 protein gamma OS=Mus musculus GN=Ywhag PE=1 SV=2
44.21_2126.0431n	1	#8121	4	44.2129	2126.04	0	SEAHEISKEHMQPTHPIR		P61982	1433G_MOUSE 14-3-3 protein gamma OS=Mus musculus GN=Ywhag PE=1 SV=2
44.21_2126.0511n	2	#72840,#18923	4,5	44.2128	2126.05	0	SEAHEISKEHMQPTHPIR		P61982	1433G_MOUSE 14-3-3 protein gamma OS=Mus musculus GN=Ywhag PE=1 SV=2
96.12_2129.9631n	1	#30096	2	96.1226	2129.96	9.1756	TAFDDAIAELDTLNEDSYK		P61982	1433G_MOUSE 14-3-3 protein gamma OS=Mus musculus GN=Ywhag PE=1 SV=2
95.58_2129.9726n	1	#49327	3	95.5792	2129.97	9.2866	TAFDDAIAELDTLNEDSYK		P61982	1433G_MOUSE 14-3-3 protein gamma OS=Mus musculus GN=Ywhag PE=1 SV=2
96.12_2129.9756n	1	#57324	3	96.1226	2129.98	9.1756	TAFDDAIAELDTLNEDSYK		P61982	1433G_MOUSE 14-3-3 protein gamma OS=Mus musculus GN=Ywhag PE=1 SV=2
72.30_2192.8715n	1	#13961	2	72.3016	2192.87	8.8624	DNLTLWTSDQQDDDGGEGNN		P61982	1433G_MOUSE 14-3-3 protein gamma OS=Mus musculus GN=Ywhag PE=1 SV=2
73.62_2192.8731n	1	#27059	2	73.6187	2192.87	9.0014	DNLTLWTSDQQDDDGGEGNN		P61982	1433G_MOUSE 14-3-3 protein gamma OS=Mus musculus GN=Ywhag PE=1 SV=2
44.20_2360.1499n	3	#10516,#1820,#3594	3,4,5	44.2014	2360.15	9.5084	AYSEAHEISKEHMQPTHPIR		P61982	1433G_MOUSE 14-3-3 protein gamma OS=Mus musculus GN=Ywhag PE=1 SV=2
84.13_2531.2936n	1	#5439	3	84.1282	2531.29	8.9806	NVTELNEPLSNEERNLLSVAYK		P61982	1433G_MOUSE 14-3-3 protein gamma OS=Mus musculus GN=Ywhag PE=1 SV=2
99.33_2604.3292n	1	#1627	3	99.3312	2604.33	8.3575	IEKELEAVCQDVLSLLDNYLIK	[9] Carbamidomethyl C	P61982	1433G_MOUSE 14-3-3 protein gamma OS=Mus musculus GN=Ywhag PE=1 SV=2
100.03_3011.4957n	1	#20105	3	100.029	3011.5	9.1967	LGLALNYSVFYYEIQNAPEQACHLAK	[22] Carbamidomethyl C	P61982	1433G_MOUSE 14-3-3 protein gamma OS=Mus musculus GN=Ywhag PE=1 SV=2
99.02_3011.4973n	1	#54449	3	99.0224	3011.5	8.1199	LGLALNYSVFYYEIQNAPEQACHLAK	[22] Carbamidomethyl C	P61982	1433G_MOUSE 14-3-3 protein gamma OS=Mus musculus GN=Ywhag PE=1 SV=2
30.51_815.4127n	1	#44075	2	30.511	815.413	8.4204	LAEQAER		O70456	1433S_MOUSE 14-3-3 protein sigma OS=Mus musculus GN=Sfn PE=1 SV=2
41.31_902.5046n	1	#374	2	41.3125	902.505	9.2591	VLSSIEQK		O70456	1433S_MOUSE 14-3-3 protein sigma OS=Mus musculus GN=Sfn PE=1 SV=2
65.12_906.5177n	1	#177	2	65.1151	906.518	9.605	NLLSVAYK		O70456	1433S_MOUSE 14-3-3 protein sigma OS=Mus musculus GN=Sfn PE=1 SV=2
72.25_907.4968n	1	#44554	2	72.2502	907.497	8.6956	NLLSVAYK	[1] Deamidation N	O70456	1433S_MOUSE 14-3-3 protein sigma OS=Mus musculus GN=Sfn PE=1 SV=2
36.18_931.4218n	1	#2035	2	36.1756	931.422	8.3856	MKGDYYR		O70456	1433S_MOUSE 14-3-3 protein sigma OS=Mus musculus GN=Sfn PE=1 SV=2
95.68_1188.6545n	1	#1156	2	95.6821	1188.65	9.3841	DSTLIMQLLR		O70456	1433S_MOUSE 14-3-3 protein sigma OS=Mus musculus GN=Sfn PE=1 SV=2
49.96_1241.5598n	1	#91777	2	49.962	1241.56	6.1989	SAYQEAMDISK		O70456	1433S_MOUSE 14-3-3 protein sigma OS=Mus musculus GN=Sfn PE=1 SV=2
50.85_1428.7620n	1	#7225	3	50.8543	1428.76	6.9112	AAWRVLSSIEQK	[N-term] Acetyl N-TERM	O70456	1433S_MOUSE 14-3-3 protein sigma OS=Mus musculus GN=Sfn PE=1 SV=2
50.84_1428.7691n	1	#18215	2	50.8372	1428.77	6.9112	AAWRVLSSIEQK	[N-term] Acetyl N-TERM	O70456	1433S_MOUSE 14-3-3 protein sigma OS=Mus musculus GN=Sfn PE=1 SV=2
39.83_730.4188n	1	#5481	2	39.8309	730.419	8.5279	TELIQK		P68254	1433T_MOUSE 14-3-3 protein theta OS=Mus musculus GN=Ywhaq PE=1 SV=1
47.66_741.5041n	1	#46044	2	47.6623	741.504	8.2557	KLQLIK		P68254	1433T_MOUSE 14-3-3 protein theta OS=Mus musculus GN=Ywhaq PE=1 SV=1
30.51_815.4127n	1	#44075	2	30.511	815.413	8.4204	LAEQAER		P68254	1433T_MOUSE 14-3-3 protein theta OS=Mus musculus GN=Ywhaq PE=1 SV=1
41.31_902.5046n	1	#374	2	41.3125	902.505	9.2591	VISSIEQK		P68254	1433T_MOUSE 14-3-3 protein theta OS=Mus musculus GN=Ywhaq PE=1 SV=1
65.12_906.5177n	1	#177	2	65.1151	906.518	9.605	NLLSVAYK		P68254	1433T_MOUSE 14-3-3 protein theta OS=Mus musculus GN=Ywhaq PE=1 SV=1
72.25_907.4968n	1	#44554	2	72.2502	907.497	8.6956	NLLSVAYK	[1] Deamidation N	P68254	1433T_MOUSE 14-3-3 protein theta OS=Mus musculus GN=Ywhaq PE=1 SV=1
44.20_915.4297n	1	#3905	2	44.1957	915.43	7.7961	MKGDYFR		P68254	1433T_MOUSE 14-3-3 protein theta OS=Mus musculus GN=Ywhaq PE=1 SV=1
36.98_988.4932n	1	#1005	2	36.9764	988.493	7.6487	EKVESELR		P68254	1433T_MOUSE 14-3-3 protein theta OS=Mus musculus GN=Ywhaq PE=1 SV=1
37.20_988.4933n	1	#21883	2	37.1995	988.493	7.6487	EKVESELR		P68254	1433T_MOUSE 14-3-3 protein theta OS=Mus musculus GN=Ywhaq PE=1 SV=1
56.86_1047.5992n	1	#17782	2	56.8608	1047.6	7.9553	LQLIKDYR		P68254	1433T_MOUSE 14-3-3 protein theta OS=Mus musculus GN=Ywhaq PE=1 SV=1
38.96_1107.5515n	2	#546,#14063	2,3	38.9585	1107.55	9.3549	EMQPTHPIR		P68254	1433T_MOUSE 14-3-3 protein theta OS=Mus musculus GN=Ywhaq PE=1 SV=1
45.29_1119.4965n	1	#36776	2	45.2883	1119.5	0	AEVACGDDRK	[5] Carbamidomethyl C	P68254	1433T_MOUSE 14-3-3 protein theta OS=Mus musculus GN=Ywhaq PE=1 SV=1
48.02_1133.4198n	1	#8719	2	48.017	1133.42	8.651	YDDMATCMK	[7] Carbamidomethyl C	P68254	1433T_MOUSE 14-3-3 protein theta OS=Mus musculus GN=Ywhaq PE=1 SV=1
55.75_1160.6099n	1	#359	2	55.7511	1160.61	8.5161	MEKTELIQK	[N-term] Acetyl N-TERM	P68254	1433T_MOUSE 14-3-3 protein theta OS=Mus musculus GN=Ywhaq PE=1 SV=1
95.68_1188.6545n	1	#1156	2	95.6821	1188.65	9.3841	DSTLIMQLLR		P68254	1433T_MOUSE 14-3-3 protein theta OS=Mus musculus GN=Ywhaq PE=1 SV=1
34.49_1235.6373n	1	#99964	2	34.488	1235.64	9.0448	KEMQPTHPIR		P68254	1433T_MOUSE 14-3-3 protein theta OS=Mus musculus GN=Ywhaq PE=1 SV=1
34.71_1235.6406n	1	#58728	2	34.711	1235.64	8.9014	KEMQPTHPIR		P68254	1433T_MOUSE 14-3-3 protein theta OS=Mus musculus GN=Ywhaq PE=1 SV=1
35.03_1235.6418n	1	#46667	2	35.0316	1235.64	8.8634	KEMQPTHPIR		P68254	1433T_MOUSE 14-3-3 protein theta OS=Mus musculus GN=Ywhaq PE=1 SV=1
34.56_1235.6461n	1	#13340	3	34.5566	1235.65	9.0448	KEMQPTHPIR		P68254	1433T_MOUSE 14-3-3 protein theta OS=Mus musculus GN=Ywhaq PE=1 SV=1
34.98_1235.6461n	1	#6368	3	34.9801	1235.65	8.9809	KEMQPTHPIR		P68254	1433T_MOUSE 14-3-3 protein theta OS=Mus musculus GN=Ywhaq PE=1 SV=1
54.37_1319.6729n	1	#86751	2	54.3667	1319.67	6.9826	YLIANATNPESK		P68254	1433T_MOUSE 14-3-3 protein theta OS=Mus musculus GN=Ywhaq PE=1 SV=1
45.27_1395.6520n	2	#16892,#17935	2,3	45.2711	1395.65	8.7358	YLAEVACGDDRK	[7] Carbamidomethyl C	P68254	1433T_MOUSE 14-3-3 protein theta OS=Mus musculus GN=Ywhaq PE=1 SV=1
70.41_1488.8726n	1	#51	2	70.4082	1488.87	6.4538	NLLSVAYKNVVGGR		P68254	1433T_MOUSE 14-3-3 protein theta OS=Mus musculus GN=Ywhaq PE=1 SV=1
44.66_1531.7140n	1	#1536	2	44.659	1531.71	8.6885	AVTEQGAELSNEER		P68254	1433T_MOUSE 14-3-3 protein theta OS=Mus musculus GN=Ywhaq PE=1 SV=1
56.48_1930.8315n	2	#22636,#8073	2,3	56.4833	1930.83	8.8505	LAEQAERYDDMATCMK	[14] Carbamidomethyl C	P68254	1433T_MOUSE 14-3-3 protein theta OS=Mus musculus GN=Ywhaq PE=1 SV=1
56.95_1930.8320n	2	#30931,#12210	2,3	56.9495	1930.83	9.0064	LAEQAERYDDMATCMK	[14] Carbamidomethyl C	P68254	1433T_MOUSE 14-3-3 protein theta OS=Mus musculus GN=Ywhaq PE=1 SV=1
85.12_1970.0513n	1	#18981	3	85.1177	1970.05	6.698	YLIANATNPESKVFYLK		P68254	1433T_MOUSE 14-3-3 protein theta OS=Mus musculus GN=Ywhaq PE=1 SV=1
67.34_2027.9581n	1	#31645	2	67.3355	2027.96	6.7814	QTIENSQGAYQEAFDISK		P68254	1433T_MOUSE 14-3-3 protein theta OS=Mus musculus GN=Ywhaq PE=1 SV=1
101.29_2104.1001n	1	#61663	3	101.293	2104.1	6.7129	VESELRSICTTVLELLDK	[9] Carbamidomethyl C	P68254	1433T_MOUSE 14-3-3 protein theta OS=Mus musculus GN=Ywhaq PE=1 SV=1
97.64_2104.1073n	2	#6794,#29784	3,4	97.644	2104.11	6.8656	VESELRSICTTVLELLDK	[9] Carbamidomethyl C	P68254	1433T_MOUSE 14-3-3 protein theta OS=Mus musculus GN=Ywhaq PE=1 SV=1
97.27_2143.9798n	1	#23865	2	97.2665	2143.98	8.4684	TAFDEAIAELDTLNEDSYK		P68254	1433T_MOUSE 14-3-3 protein theta OS=Mus musculus GN=Ywhaq PE=1 SV=1
96.87_2143.9938n	1	#57387	3	96.8718	2143.99	8.4684	TAFDEAIAELDTLNEDSYK		P68254	1433T_MOUSE 14-3-3 protein theta OS=Mus musculus GN=Ywhaq PE=1 SV=1
63.41_2156.0407n	2	#39286,#5236	2,3	63.4106	2156.04	8.994	QTIENSQGAYQEAFDISKK		P68254	1433T_MOUSE 14-3-3 protein theta OS=Mus musculus GN=Ywhaq PE=1 SV=1
38.97_521.3071n	1	#7775	2	38.9728	521.307	0	HPIR		P63101	1433Z_MOUSE 14-3-3 protein zeta/delta OS=Mus musculus GN=Ywhaz PE=1 SV=1
48.38_614.3508n	1	#48022	2	48.3774	614.351	6.7244	NVVGAR		P63101	1433Z_MOUSE 14-3-3 protein zeta/delta OS=Mus musculus GN=Ywhaz PE=1 SV=1
38.97_622.3538n	1	#15814	2	38.9728	622.354	0	THPIR		P63101	1433Z_MOUSE 14-3-3 protein zeta/delta OS=Mus musculus GN=Ywhaz PE=1 SV=1
30.51_815.4127n	1	#44075	2	30.511	815.413	8.4204	LAEQAER		P63101	1433Z_MOUSE 14-3-3 protein zeta/delta OS=Mus musculus GN=Ywhaz PE=1 SV=1
37.25_888.4650n	1	#33939	2	37.251	888.465	7.6713	VVSSIEQK		P63101	1433Z_MOUSE 14-3-3 protein zeta/delta OS=Mus musculus GN=Ywhaz PE=1 SV=1
65.12_906.5177n	1	#177	2	65.1151	906.518	9.605	NLLSVAYK		P63101	1433Z_MOUSE 14-3-3 protein zeta/delta OS=Mus musculus GN=Ywhaz PE=1 SV=1
72.25_907.4968n	1	#44554	2	72.2502	907.497	8.6956	NLLSVAYK	[1] Deamidation N	P63101	1433Z_MOUSE 14-3-3 protein zeta/delta OS=Mus musculus GN=Ywhaz PE=1 SV=1
36.18_931.4218n	1	#2035	2	36.1756	931.422	8.3856	MKGDYYR		P63101	1433Z_MOUSE 14-3-3 protein zeta/delta OS=Mus musculus GN=Ywhaz PE=1 SV=1
47.42_1016.5359n	1	#74545	2	47.4221	1016.54	7.5874	EKIETELR		P63101	1433Z_MOUSE 14-3-3 protein zeta/delta OS=Mus musculus GN=Ywhaz PE=1 SV=1
49.13_1103.4101n	1	#1223	2	49.1268	1103.41	9.5382	YDDMAACMK	[7] Carbamidomethyl C	P63101	1433Z_MOUSE 14-3-3 protein zeta/delta OS=Mus musculus GN=Ywhaz PE=1 SV=1
38.96_1107.5515n	2	#546,#14063	2,3	38.9585	1107.55	9.3549	EMQPTHPIR		P63101	1433Z_MOUSE 14-3-3 protein zeta/delta OS=Mus musculus GN=Ywhaz PE=1 SV=1
50.08_1145.5851n	1	#6	2	50.0821	1145.59	8.5779	MDKNELVQK	[N-term] Acetyl N-TERM	P63101	1433Z_MOUSE 14-3-3 protein zeta/delta OS=Mus musculus GN=Ywhaz PE=1 SV=1
51.61_1146.5318n	2	#1907,#4495	2,3	51.6123	1146.53	8.5561	MDKNELVQK	[N-term] Acetyl N-TERM|[4] Deamidation N	P63101	1433Z_MOUSE 14-3-3 protein zeta/delta OS=Mus musculus GN=Ywhaz PE=1 SV=1
40.01_1161.5596n	1	#9221	2	40.014	1161.56	8.3613	MDKNELVQK	[N-term] Acetyl N-TERM|[1] Oxidation M	P63101	1433Z_MOUSE 14-3-3 protein zeta/delta OS=Mus musculus GN=Ywhaz PE=1 SV=1
50.06_1161.5669n	1	#7770	2	50.065	1161.57	8.3957	MDKNELVQK	[N-term] Acetyl N-TERM|[1] Oxidation M	P63101	1433Z_MOUSE 14-3-3 protein zeta/delta OS=Mus musculus GN=Ywhaz PE=1 SV=1
95.68_1188.6545n	1	#1156	2	95.6821	1188.65	9.3841	DSTLIMQLLR		P63101	1433Z_MOUSE 14-3-3 protein zeta/delta OS=Mus musculus GN=Ywhaz PE=1 SV=1
34.49_1235.6373n	1	#99964	2	34.488	1235.64	9.0448	KEMQPTHPIR		P63101	1433Z_MOUSE 14-3-3 protein zeta/delta OS=Mus musculus GN=Ywhaz PE=1 SV=1
34.71_1235.6406n	1	#58728	2	34.711	1235.64	8.9014	KEMQPTHPIR		P63101	1433Z_MOUSE 14-3-3 protein zeta/delta OS=Mus musculus GN=Ywhaz PE=1 SV=1
35.03_1235.6418n	1	#46667	2	35.0316	1235.64	8.8634	KEMQPTHPIR		P63101	1433Z_MOUSE 14-3-3 protein zeta/delta OS=Mus musculus GN=Ywhaz PE=1 SV=1
34.56_1235.6461n	1	#13340	3	34.5566	1235.65	9.0448	KEMQPTHPIR		P63101	1433Z_MOUSE 14-3-3 protein zeta/delta OS=Mus musculus GN=Ywhaz PE=1 SV=1
34.98_1235.6461n	1	#6368	3	34.9801	1235.65	8.9809	KEMQPTHPIR		P63101	1433Z_MOUSE 14-3-3 protein zeta/delta OS=Mus musculus GN=Ywhaz PE=1 SV=1
44.32_1278.6490n	2	#187,#480	2,3	44.3158	1278.65	9.8516	YLAEVAAGDDKK		P63101	1433Z_MOUSE 14-3-3 protein zeta/delta OS=Mus musculus GN=Ywhaz PE=1 SV=1
63.55_1329.6995n	1	#44	2	63.5479	1329.7	9.1154	FLIPNASQPESK		P63101	1433Z_MOUSE 14-3-3 protein zeta/delta OS=Mus musculus GN=Ywhaz PE=1 SV=1
53.10_1404.7533n	1	#10102	3	53.1025	1404.75	6.8521	SSWRVVSSIEQK		P63101	1433Z_MOUSE 14-3-3 protein zeta/delta OS=Mus musculus GN=Ywhaz PE=1 SV=1
100.18_1417.7139n	1	#1641	2	100.183	1417.71	9.1219	DICNDVLSLLEK	[3] Carbamidomethyl C	P63101	1433Z_MOUSE 14-3-3 protein zeta/delta OS=Mus musculus GN=Ywhaz PE=1 SV=1
90.39_1418.6967n	1	#14704	2	90.3915	1418.7	8.2264	DICNDVLSLLEK	[3] Carbamidomethyl C|[4] Deamidation N	P63101	1433Z_MOUSE 14-3-3 protein zeta/delta OS=Mus musculus GN=Ywhaz PE=1 SV=1
78.28_1502.8268n	1	#26565	2	78.2753	1502.83	8.849	NLLSVAYKNVVGAR		P63101	1433Z_MOUSE 14-3-3 protein zeta/delta OS=Mus musculus GN=Ywhaz PE=1 SV=1
78.43_1502.8351n	1	#32120	2	78.4297	1502.84	8.4989	NLLSVAYKNVVGAR		P63101	1433Z_MOUSE 14-3-3 protein zeta/delta OS=Mus musculus GN=Ywhaz PE=1 SV=1
78.33_1502.8362n	1	#30798	2	78.3268	1502.84	7.8882	NLLSVAYKNVVGAR		P63101	1433Z_MOUSE 14-3-3 protein zeta/delta OS=Mus musculus GN=Ywhaz PE=1 SV=1
78.36_1502.8553n	1	#60848	3	78.3611	1502.86	8.849	NLLSVAYKNVVGAR		P63101	1433Z_MOUSE 14-3-3 protein zeta/delta OS=Mus musculus GN=Ywhaz PE=1 SV=1
40.59_1503.7796n	2	#4582,#3493	2,3	40.5889	1503.78	9.5464	VVSSIEQKTEGAEK		P63101	1433Z_MOUSE 14-3-3 protein zeta/delta OS=Mus musculus GN=Ywhaz PE=1 SV=1
45.67_1547.7069n	1	#57720	2	45.6658	1547.71	9.5866	SVTEQGAELSNEER		P63101	1433Z_MOUSE 14-3-3 protein zeta/delta OS=Mus musculus GN=Ywhaz PE=1 SV=1
45.67_1547.7116n	1	#114	2	45.6658	1547.71	9.5866	SVTEQGAELSNEER		P63101	1433Z_MOUSE 14-3-3 protein zeta/delta OS=Mus musculus GN=Ywhaz PE=1 SV=1
43.99_1548.6952n	1	#41779	2	43.9898	1548.7	7.9501	SVTEQGAELSNEER	[11] Deamidation N	P63101	1433Z_MOUSE 14-3-3 protein zeta/delta OS=Mus musculus GN=Ywhaz PE=1 SV=1
57.87_1716.6931n	1	#23409	2	57.8676	1716.69	0	EQAERYDDMAACMK	[12] Carbamidomethyl C	P63101	1433Z_MOUSE 14-3-3 protein zeta/delta OS=Mus musculus GN=Ywhaz PE=1 SV=1
57.87_1716.6940n	1	#82018	2	57.8676	1716.69	0	EQAERYDDMAACMK	[12] Carbamidomethyl C	P63101	1433Z_MOUSE 14-3-3 protein zeta/delta OS=Mus musculus GN=Ywhaz PE=1 SV=1
74.20_1898.8974n	1	#64598	2	74.1963	1898.9	0	DQSQQAYQEAFEISKK		P63101	1433Z_MOUSE 14-3-3 protein zeta/delta OS=Mus musculus GN=Ywhaz PE=1 SV=1
57.85_1900.8177n	2	#1250,#379	2,3	57.8505	1900.82	9.8145	LAEQAERYDDMAACMK	[14] Carbamidomethyl C	P63101	1433Z_MOUSE 14-3-3 protein zeta/delta OS=Mus musculus GN=Ywhaz PE=1 SV=1
57.87_1916.8169n	1	#89854	2	57.8676	1916.82	7.746	LAEQAERYDDMAACMK	[11] Oxidation M|[14] Carbamidomethyl C	P63101	1433Z_MOUSE 14-3-3 protein zeta/delta OS=Mus musculus GN=Ywhaz PE=1 SV=1
77.65_2039.9811n	1	#702	2	77.6461	2039.98	9.8402	GIVDQSQQAYQEAFEISK		P63101	1433Z_MOUSE 14-3-3 protein zeta/delta OS=Mus musculus GN=Ywhaz PE=1 SV=1
103.48_2130.9935n	2	#5515,#9085	2,3	103.478	2130.99	9.5599	TAFDEAIAELDTLSEESYK		P63101	1433Z_MOUSE 14-3-3 protein zeta/delta OS=Mus musculus GN=Ywhaz PE=1 SV=1
70.61_2168.0675n	2	#1144,#165	2,3	70.6055	2168.07	9.3227	KGIVDQSQQAYQEAFEISK		P63101	1433Z_MOUSE 14-3-3 protein zeta/delta OS=Mus musculus GN=Ywhaz PE=1 SV=1
74.21_2168.0766n	2	#3483,#304	2,3	74.2135	2168.08	9.6909	GIVDQSQQAYQEAFEISKK		P63101	1433Z_MOUSE 14-3-3 protein zeta/delta OS=Mus musculus GN=Ywhaz PE=1 SV=1
74.63_2407.9819n	1	#56786	3	74.6253	2407.98	7.9647	DNLTLWTSDTQGDEAEAGEGGEN		P63101	1433Z_MOUSE 14-3-3 protein zeta/delta OS=Mus musculus GN=Ywhaz PE=1 SV=1
80.25_2436.2224n	1	#2663	3	80.2548	2436.22	8.7301	SVTEQGAELSNEERNLLSVAYK		P63101	1433Z_MOUSE 14-3-3 protein zeta/delta OS=Mus musculus GN=Ywhaz PE=1 SV=1
96.35_2729.4127n	1	#54559	3	96.3456	2729.41	7.6418	DICNDVLSLLEKFLIPNASQPESK	[3] Carbamidomethyl C	P63101	1433Z_MOUSE 14-3-3 protein zeta/delta OS=Mus musculus GN=Ywhaz PE=1 SV=1
57.22_715.3762n	1	#5392	2	57.2155	715.376	5.5172	GLEELR		Q6PD28	2A5B_MOUSE Serine/threonine-protein phosphatase 2A 56 kDa regulatory subunit beta isoform OS=Mus musculus GN=Ppp2r5b PE=1 SV=1
60.84_873.4929n	1	#15181	2	60.8365	873.493	6.391	IQEPLFK		Q6PD28	2A5B_MOUSE Serine/threonine-protein phosphatase 2A 56 kDa regulatory subunit beta isoform OS=Mus musculus GN=Ppp2r5b PE=1 SV=1
46.67_1214.6055n	1	#6305	2	46.6727	1214.61	5.934	AQERQELWR		Q6PD28	2A5B_MOUSE Serine/threonine-protein phosphatase 2A 56 kDa regulatory subunit beta isoform OS=Mus musculus GN=Ppp2r5b PE=1 SV=1
87.82_1482.8309n	1	#43164	2	87.8177	1482.83	6.0223	GVLIEPVYPDIIR		Q6PD28	2A5B_MOUSE Serine/threonine-protein phosphatase 2A 56 kDa regulatory subunit beta isoform OS=Mus musculus GN=Ppp2r5b PE=1 SV=1
72.34_1555.8081n	2	#182,#34147	2,3	72.3446	1555.81	5.2621	LFDELTASYKLEK		Q6PD28	2A5B_MOUSE Serine/threonine-protein phosphatase 2A 56 kDa regulatory subunit beta isoform OS=Mus musculus GN=Ppp2r5b PE=1 SV=1
82.47_1770.8824n	1	#34011	2	82.4749	1770.88	6.0723	YQSNQQELTPLPLLK		Q6PD28	2A5B_MOUSE Serine/threonine-protein phosphatase 2A 56 kDa regulatory subunit beta isoform OS=Mus musculus GN=Ppp2r5b PE=1 SV=1
82.51_1770.9363n	1	#55836	2	82.5092	1770.94	5.6548	YQSNQQELTPLPLLK		Q6PD28	2A5B_MOUSE Serine/threonine-protein phosphatase 2A 56 kDa regulatory subunit beta isoform OS=Mus musculus GN=Ppp2r5b PE=1 SV=1
104.45_2101.0253n	1	#44173	2	104.45	2101.03	6.199	LAQCGVMFDFLDCVADLK	[4] Carbamidomethyl C|[13] Carbamidomethyl C	Q6PD28	2A5B_MOUSE Serine/threonine-protein phosphatase 2A 56 kDa regulatory subunit beta isoform OS=Mus musculus GN=Ppp2r5b PE=1 SV=1
103.72_2101.0360n	1	#24079	2	103.718	2101.04	5.3675	LAQCGVMFDFLDCVADLK	[4] Carbamidomethyl C|[13] Carbamidomethyl C	Q6PD28	2A5B_MOUSE Serine/threonine-protein phosphatase 2A 56 kDa regulatory subunit beta isoform OS=Mus musculus GN=Ppp2r5b PE=1 SV=1
47.61_770.4355n	1	#98707	2	47.6108	770.435	4.3754	RDGIIPT		Q61151	2A5E_MOUSE Serine/threonine-protein phosphatase 2A 56 kDa regulatory subunit epsilon isoform OS=Mus musculus GN=Ppp2r5e PE=1 SV=3
55.79_770.4574n	1	#18148	2	55.7854	770.457	5.4386	RDGIIPT		Q61151	2A5E_MOUSE Serine/threonine-protein phosphatase 2A 56 kDa regulatory subunit epsilon isoform OS=Mus musculus GN=Ppp2r5e PE=1 SV=3
60.84_873.4929n	1	#15181	2	60.8365	873.493	6.8532	IQEPLFK		Q61151	2A5E_MOUSE Serine/threonine-protein phosphatase 2A 56 kDa regulatory subunit epsilon isoform OS=Mus musculus GN=Ppp2r5e PE=1 SV=3
53.38_986.5256n	1	#2091	2	53.3771	986.526	5.5478	KLEDLELK		Q61151	2A5E_MOUSE Serine/threonine-protein phosphatase 2A 56 kDa regulatory subunit epsilon isoform OS=Mus musculus GN=Ppp2r5e PE=1 SV=3
62.25_986.5347n	1	#24668	2	62.2494	986.535	5.4011	KLEDLELK		Q61151	2A5E_MOUSE Serine/threonine-protein phosphatase 2A 56 kDa regulatory subunit epsilon isoform OS=Mus musculus GN=Ppp2r5e PE=1 SV=3
49.47_1014.5738n	1	#632	2	49.47	1014.57	6.3832	LEDLELKR		Q61151	2A5E_MOUSE Serine/threonine-protein phosphatase 2A 56 kDa regulatory subunit epsilon isoform OS=Mus musculus GN=Ppp2r5e PE=1 SV=3
98.34_1091.6675n	1	#21627	2	98.3417	1091.67	5.3232	FLGLRAFIR		Q61151	2A5E_MOUSE Serine/threonine-protein phosphatase 2A 56 kDa regulatory subunit epsilon isoform OS=Mus musculus GN=Ppp2r5e PE=1 SV=3
45.03_1098.6143n	1	#85656	3	45.0309	1098.61	5.3881	AEHKQFLVK		Q61151	2A5E_MOUSE Serine/threonine-protein phosphatase 2A 56 kDa regulatory subunit epsilon isoform OS=Mus musculus GN=Ppp2r5e PE=1 SV=3
42.65_1185.5874n	1	#74089	2	42.6454	1185.59	5.4286	SSAPTTPPSVDK		Q61151	2A5E_MOUSE Serine/threonine-protein phosphatase 2A 56 kDa regulatory subunit epsilon isoform OS=Mus musculus GN=Ppp2r5e PE=1 SV=3
52.37_1316.5767n	1	#6983	2	52.3703	1316.58	5.5017	MSSAPTTPPSVDK		Q61151	2A5E_MOUSE Serine/threonine-protein phosphatase 2A 56 kDa regulatory subunit epsilon isoform OS=Mus musculus GN=Ppp2r5e PE=1 SV=3
44.06_1316.6686n	1	#3333	2	44.0584	1316.67	5.5832	MSSAPTTPPSVDK		Q61151	2A5E_MOUSE Serine/threonine-protein phosphatase 2A 56 kDa regulatory subunit epsilon isoform OS=Mus musculus GN=Ppp2r5e PE=1 SV=3
59.31_1502.7455n	1	#43477	2	59.3148	1502.75	5.4668	DVPTSEQPELFLK	[7] Deamidation Q	Q61151	2A5E_MOUSE Serine/threonine-protein phosphatase 2A 56 kDa regulatory subunit epsilon isoform OS=Mus musculus GN=Ppp2r5e PE=1 SV=3
96.52_1622.8271n	1	#32110	2	96.5172	1622.83	6.4616	STLNELVDYITISR		Q61151	2A5E_MOUSE Serine/threonine-protein phosphatase 2A 56 kDa regulatory subunit epsilon isoform OS=Mus musculus GN=Ppp2r5e PE=1 SV=3
82.76_1632.9425n	2	#91309,#43503	2,3	82.7582	1632.94	6.5203	SQGKPIELTPLPLLK		Q61151	2A5E_MOUSE Serine/threonine-protein phosphatase 2A 56 kDa regulatory subunit epsilon isoform OS=Mus musculus GN=Ppp2r5e PE=1 SV=3
49.54_1855.9619n	1	#56214	3	49.5386	1855.96	4.9788	QIAKCVSSPHFQVAER	[5] Carbamidomethyl C	Q61151	2A5E_MOUSE Serine/threonine-protein phosphatase 2A 56 kDa regulatory subunit epsilon isoform OS=Mus musculus GN=Ppp2r5e PE=1 SV=3
82.55_2193.2278n	2	#15543,#801	2,3	82.5521	2193.23	5.0807	ISKEHWNPAIVALVYNVLK		Q61151	2A5E_MOUSE Serine/threonine-protein phosphatase 2A 56 kDa regulatory subunit epsilon isoform OS=Mus musculus GN=Ppp2r5e PE=1 SV=3
59.31_798.4127n	1	#94153	2	59.3148	798.413	0	PNYLHR		Q76MZ3	2AAA_MOUSE Serine/threonine-protein phosphatase 2A 65 kDa regulatory subunit A alpha isoform OS=Mus musculus GN=Ppp2r1a PE=1 SV=3
41.91_813.4580n	1	#20538	2	41.9132	813.458	6.8188	AVGPEITK		Q76MZ3	2AAA_MOUSE Serine/threonine-protein phosphatase 2A 65 kDa regulatory subunit A alpha isoform OS=Mus musculus GN=Ppp2r1a PE=1 SV=3
41.30_872.4649n	1	#4191	2	41.2954	872.465	7.4293	NEDVQLR		Q76MZ3	2AAA_MOUSE Serine/threonine-protein phosphatase 2A 65 kDa regulatory subunit A alpha isoform OS=Mus musculus GN=Ppp2r1a PE=1 SV=3
46.59_877.3745n	1	#86376	2	46.5868	877.374	6.1176	DCEAEVR	[2] Carbamidomethyl C	Q76MZ3	2AAA_MOUSE Serine/threonine-protein phosphatase 2A 65 kDa regulatory subunit A alpha isoform OS=Mus musculus GN=Ppp2r1a PE=1 SV=3
58.00_928.5093n	1	#4714	2	57.9992	928.509	8.2141	VLELDNVK		Q76MZ3	2AAA_MOUSE Serine/threonine-protein phosphatase 2A 65 kDa regulatory subunit A alpha isoform OS=Mus musculus GN=Ppp2r1a PE=1 SV=3
59.40_965.5454n	1	#2692	2	59.4007	965.545	7.9635	HMLPTVLR		Q76MZ3	2AAA_MOUSE Serine/threonine-protein phosphatase 2A 65 kDa regulatory subunit A alpha isoform OS=Mus musculus GN=Ppp2r1a PE=1 SV=3
58.63_965.5473n	1	#6371	2	58.6341	965.547	7.6905	HMLPTVLR		Q76MZ3	2AAA_MOUSE Serine/threonine-protein phosphatase 2A 65 kDa regulatory subunit A alpha isoform OS=Mus musculus GN=Ppp2r1a PE=1 SV=3
58.29_965.5491n	1	#14013	2	58.2909	965.549	7.6829	HMLPTVLR		Q76MZ3	2AAA_MOUSE Serine/threonine-protein phosphatase 2A 65 kDa regulatory subunit A alpha isoform OS=Mus musculus GN=Ppp2r1a PE=1 SV=3
43.74_980.5005n	1	#38456	2	43.738	980.501	7.0378	VRYMVADK		Q76MZ3	2AAA_MOUSE Serine/threonine-protein phosphatase 2A 65 kDa regulatory subunit A alpha isoform OS=Mus musculus GN=Ppp2r1a PE=1 SV=3
55.58_980.5226n	1	#72690	2	55.5795	980.523	6.4692	VRYMVADK		Q76MZ3	2AAA_MOUSE Serine/threonine-protein phosphatase 2A 65 kDa regulatory subunit A alpha isoform OS=Mus musculus GN=Ppp2r1a PE=1 SV=3
68.15_1060.4546n	1	#53419	2	68.1544	1060.45	0	AISHEHSPSD		Q76MZ3	2AAA_MOUSE Serine/threonine-protein phosphatase 2A 65 kDa regulatory subunit A alpha isoform OS=Mus musculus GN=Ppp2r1a PE=1 SV=3
67.49_1060.4575n	1	#73280	2	67.49	1060.46	0	AISHEHSPSD		Q76MZ3	2AAA_MOUSE Serine/threonine-protein phosphatase 2A 65 kDa regulatory subunit A alpha isoform OS=Mus musculus GN=Ppp2r1a PE=1 SV=3
70.00_1108.5354n	1	#1966	2	69.9964	1108.54	8.0992	LAGGDWFTSR		Q76MZ3	2AAA_MOUSE Serine/threonine-protein phosphatase 2A 65 kDa regulatory subunit A alpha isoform OS=Mus musculus GN=Ppp2r1a PE=1 SV=3
39.44_1238.6234n	1	#13381	2	39.4362	1238.62	8.074	ELVSDANQHVK		Q76MZ3	2AAA_MOUSE Serine/threonine-protein phosphatase 2A 65 kDa regulatory subunit A alpha isoform OS=Mus musculus GN=Ppp2r1a PE=1 SV=3
39.23_1238.6418n	1	#26305	3	39.2302	1238.64	8.074	ELVSDANQHVK		Q76MZ3	2AAA_MOUSE Serine/threonine-protein phosphatase 2A 65 kDa regulatory subunit A alpha isoform OS=Mus musculus GN=Ppp2r1a PE=1 SV=3
81.36_1241.7317n	1	#12606	2	81.3646	1241.73	8.5438	LSTIALALGVER		Q76MZ3	2AAA_MOUSE Serine/threonine-protein phosphatase 2A 65 kDa regulatory subunit A alpha isoform OS=Mus musculus GN=Ppp2r1a PE=1 SV=3
81.21_1241.7346n	1	#43181	2	81.2102	1241.73	7.9089	LSTIALALGVER		Q76MZ3	2AAA_MOUSE Serine/threonine-protein phosphatase 2A 65 kDa regulatory subunit A alpha isoform OS=Mus musculus GN=Ppp2r1a PE=1 SV=3
91.42_1241.7364n	1	#131028	2	91.4154	1241.74	6.0816	LSTIALALGVER		Q76MZ3	2AAA_MOUSE Serine/threonine-protein phosphatase 2A 65 kDa regulatory subunit A alpha isoform OS=Mus musculus GN=Ppp2r1a PE=1 SV=3
64.47_1264.6328n	1	#18179	2	64.4688	1264.63	7.0649	RLAGGDWFTSR		Q76MZ3	2AAA_MOUSE Serine/threonine-protein phosphatase 2A 65 kDa regulatory subunit A alpha isoform OS=Mus musculus GN=Ppp2r1a PE=1 SV=3
63.99_1264.6363n	1	#18229	2	63.9883	1264.64	6.7119	RLAGGDWFTSR		Q76MZ3	2AAA_MOUSE Serine/threonine-protein phosphatase 2A 65 kDa regulatory subunit A alpha isoform OS=Mus musculus GN=Ppp2r1a PE=1 SV=3
52.95_1306.5726n	1	#2374	2	52.948	1306.57	8.1083	NLCSDDTPMVR	[3] Carbamidomethyl C	Q76MZ3	2AAA_MOUSE Serine/threonine-protein phosphatase 2A 65 kDa regulatory subunit A alpha isoform OS=Mus musculus GN=Ppp2r1a PE=1 SV=3
75.51_1369.8216n	1	#58526	2	75.512	1369.82	6.9581	KLSTIALALGVER		Q76MZ3	2AAA_MOUSE Serine/threonine-protein phosphatase 2A 65 kDa regulatory subunit A alpha isoform OS=Mus musculus GN=Ppp2r1a PE=1 SV=3
75.62_1369.8217n	1	#85008	2	75.615	1369.82	6.4908	KLSTIALALGVER		Q76MZ3	2AAA_MOUSE Serine/threonine-protein phosphatase 2A 65 kDa regulatory subunit A alpha isoform OS=Mus musculus GN=Ppp2r1a PE=1 SV=3
75.39_1369.8231n	1	#74569	2	75.3919	1369.82	7.0363	KLSTIALALGVER		Q76MZ3	2AAA_MOUSE Serine/threonine-protein phosphatase 2A 65 kDa regulatory subunit A alpha isoform OS=Mus musculus GN=Ppp2r1a PE=1 SV=3
74.81_1369.8256n	1	#97825	2	74.814	1369.83	6.8882	KLSTIALALGVER		Q76MZ3	2AAA_MOUSE Serine/threonine-protein phosphatase 2A 65 kDa regulatory subunit A alpha isoform OS=Mus musculus GN=Ppp2r1a PE=1 SV=3
88.57_1375.7159n	1	#12700	2	88.567	1375.72	8.0059	TDLVPAFQNLMK		Q76MZ3	2AAA_MOUSE Serine/threonine-protein phosphatase 2A 65 kDa regulatory subunit A alpha isoform OS=Mus musculus GN=Ppp2r1a PE=1 SV=3
51.21_1400.5640n	1	#113565	2	51.209	1400.56	5.9182	EFCENLSADCR	[3] Carbamidomethyl C|[5] Deamidation N|[10] Carbamidomethyl C	Q76MZ3	2AAA_MOUSE Serine/threonine-protein phosphatase 2A 65 kDa regulatory subunit A alpha isoform OS=Mus musculus GN=Ppp2r1a PE=1 SV=3
47.80_1462.6852n	1	#31253	2	47.7996	1462.69	6.7036	NLCSDDTPMVRR	[3] Carbamidomethyl C	Q76MZ3	2AAA_MOUSE Serine/threonine-protein phosphatase 2A 65 kDa regulatory subunit A alpha isoform OS=Mus musculus GN=Ppp2r1a PE=1 SV=3
59.30_1471.7275n	1	#5962	2	59.2977	1471.73	8.251	VLAMSGDPNYLHR		Q76MZ3	2AAA_MOUSE Serine/threonine-protein phosphatase 2A 65 kDa regulatory subunit A alpha isoform OS=Mus musculus GN=Ppp2r1a PE=1 SV=3
63.39_1471.7426n	1	#5351	3	63.3934	1471.74	8.5091	YMVADKFTELQK		Q76MZ3	2AAA_MOUSE Serine/threonine-protein phosphatase 2A 65 kDa regulatory subunit A alpha isoform OS=Mus musculus GN=Ppp2r1a PE=1 SV=3
76.16_1516.7434n	1	#7027	2	76.1586	1516.74	7.7416	TSACGLFSVCYPR	[4] Carbamidomethyl C|[10] Carbamidomethyl C	Q76MZ3	2AAA_MOUSE Serine/threonine-protein phosphatase 2A 65 kDa regulatory subunit A alpha isoform OS=Mus musculus GN=Ppp2r1a PE=1 SV=3
64.85_1557.8279n	1	#26218	2	64.8463	1557.83	6.6773	ENVIMTQILPCIK	[11] Carbamidomethyl C	Q76MZ3	2AAA_MOUSE Serine/threonine-protein phosphatase 2A 65 kDa regulatory subunit A alpha isoform OS=Mus musculus GN=Ppp2r1a PE=1 SV=3
65.27_1587.8372n	2	#697,#355	2,3	65.2696	1587.84	6.6999	MAGDPVANVRFNVAK		Q76MZ3	2AAA_MOUSE Serine/threonine-protein phosphatase 2A 65 kDa regulatory subunit A alpha isoform OS=Mus musculus GN=Ppp2r1a PE=1 SV=3
51.11_1626.7242n	1	#38436	2	51.1061	1626.72	7.866	VKEFCENLSADCR	[5] Carbamidomethyl C|[12] Carbamidomethyl C	Q76MZ3	2AAA_MOUSE Serine/threonine-protein phosphatase 2A 65 kDa regulatory subunit A alpha isoform OS=Mus musculus GN=Ppp2r1a PE=1 SV=3
51.23_1626.7875n	1	#46026	2	51.2262	1626.79	7.866	VKEFCENLSADCR	[5] Carbamidomethyl C|[12] Carbamidomethyl C	Q76MZ3	2AAA_MOUSE Serine/threonine-protein phosphatase 2A 65 kDa regulatory subunit A alpha isoform OS=Mus musculus GN=Ppp2r1a PE=1 SV=3
67.83_1756.7956n	1	#97646	3	67.8332	1756.8	0	AISHEHSPSDLEAHFV		Q76MZ3	2AAA_MOUSE Serine/threonine-protein phosphatase 2A 65 kDa regulatory subunit A alpha isoform OS=Mus musculus GN=Ppp2r1a PE=1 SV=3
96.96_1941.0031n	1	#22693	2	96.9576	1941	8.1166	LNIISNLDCVNEVIGIR	[9] Carbamidomethyl C	Q76MZ3	2AAA_MOUSE Serine/threonine-protein phosphatase 2A 65 kDa regulatory subunit A alpha isoform OS=Mus musculus GN=Ppp2r1a PE=1 SV=3
88.97_2136.9996n	1	#7359	2	88.973	2137	8.4889	SEIIPMFSNLASDEQDSVR		Q76MZ3	2AAA_MOUSE Serine/threonine-protein phosphatase 2A 65 kDa regulatory subunit A alpha isoform OS=Mus musculus GN=Ppp2r1a PE=1 SV=3
82.55_2193.2278n	2	#15543,#801	2,3	82.5521	2193.23	8.8089	IGPILDNSTLQSEVKPILEK		Q76MZ3	2AAA_MOUSE Serine/threonine-protein phosphatase 2A 65 kDa regulatory subunit A alpha isoform OS=Mus musculus GN=Ppp2r1a PE=1 SV=3
68.15_2212.1299n	2	#8709,#2616	3,4	68.1544	2212.13	8.6522	AISHEHSPSDLEAHFVPLVK		Q76MZ3	2AAA_MOUSE Serine/threonine-protein phosphatase 2A 65 kDa regulatory subunit A alpha isoform OS=Mus musculus GN=Ppp2r1a PE=1 SV=3
67.48_2212.1397n	2	#5065,#63474	4,5	67.4814	2212.14	8.7202	AISHEHSPSDLEAHFVPLVK		Q76MZ3	2AAA_MOUSE Serine/threonine-protein phosphatase 2A 65 kDa regulatory subunit A alpha isoform OS=Mus musculus GN=Ppp2r1a PE=1 SV=3
88.05_2235.0404n	1	#73375	2	88.0522	2235.04	7.6305	TDLVPAFQNLMKDCEAEVR	[14] Carbamidomethyl C	Q76MZ3	2AAA_MOUSE Serine/threonine-protein phosphatase 2A 65 kDa regulatory subunit A alpha isoform OS=Mus musculus GN=Ppp2r1a PE=1 SV=3
62.95_2368.2349n	1	#81029	5	62.9472	2368.23	7.3606	AISHEHSPSDLEAHFVPLVKR		Q76MZ3	2AAA_MOUSE Serine/threonine-protein phosphatase 2A 65 kDa regulatory subunit A alpha isoform OS=Mus musculus GN=Ppp2r1a PE=1 SV=3
63.20_2368.2384n	1	#61071	5	63.2047	2368.24	6.8298	AISHEHSPSDLEAHFVPLVKR		Q76MZ3	2AAA_MOUSE Serine/threonine-protein phosphatase 2A 65 kDa regulatory subunit A alpha isoform OS=Mus musculus GN=Ppp2r1a PE=1 SV=3
63.75_2368.2398n	1	#40005	5	63.7538	2368.24	7.4536	AISHEHSPSDLEAHFVPLVKR		Q76MZ3	2AAA_MOUSE Serine/threonine-protein phosphatase 2A 65 kDa regulatory subunit A alpha isoform OS=Mus musculus GN=Ppp2r1a PE=1 SV=3
80.00_2607.2137n	1	#77332	3	79.9974	2607.21	6.2051	LAGGDWFTSRTSACGLFSVCYPR	[14] Carbamidomethyl C|[20] Carbamidomethyl C	Q76MZ3	2AAA_MOUSE Serine/threonine-protein phosphatase 2A 65 kDa regulatory subunit A alpha isoform OS=Mus musculus GN=Ppp2r1a PE=1 SV=3
93.90_2826.3339n	1	#23890	4	93.9034	2826.33	6.7801	DECPEVRLNIISNLDCVNEVIGIR	[3] Carbamidomethyl C|[16] Carbamidomethyl C	Q76MZ3	2AAA_MOUSE Serine/threonine-protein phosphatase 2A 65 kDa regulatory subunit A alpha isoform OS=Mus musculus GN=Ppp2r1a PE=1 SV=3
73.58_2867.4747n	1	#79547	5	73.5843	2867.47	6.0415	AVESLRAISHEHSPSDLEAHFVPLVK		Q76MZ3	2AAA_MOUSE Serine/threonine-protein phosphatase 2A 65 kDa regulatory subunit A alpha isoform OS=Mus musculus GN=Ppp2r1a PE=1 SV=3
41.30_872.4649n	1	#4191	2	41.2954	872.465	7.4293	NEDVQLR		Q7TNP2	2AAB_MOUSE Serine/threonine-protein phosphatase 2A 65 kDa regulatory subunit A beta isoform OS=Mus musculus GN=Ppp2r1b PE=1 SV=2
46.59_877.3745n	1	#86376	2	46.5868	877.374	6.1176	DCEAEVR	[2] Carbamidomethyl C	Q7TNP2	2AAB_MOUSE Serine/threonine-protein phosphatase 2A 65 kDa regulatory subunit A beta isoform OS=Mus musculus GN=Ppp2r1b PE=1 SV=2
43.74_980.5005n	1	#38456	2	43.738	980.501	7.0378	VRYMVADK		Q7TNP2	2AAB_MOUSE Serine/threonine-protein phosphatase 2A 65 kDa regulatory subunit A beta isoform OS=Mus musculus GN=Ppp2r1b PE=1 SV=2
55.58_980.5226n	1	#72690	2	55.5795	980.523	6.4692	VRYMVADK		Q7TNP2	2AAB_MOUSE Serine/threonine-protein phosphatase 2A 65 kDa regulatory subunit A beta isoform OS=Mus musculus GN=Ppp2r1b PE=1 SV=2
63.58_991.4694n	1	#53566	2	63.5822	991.469	5.9104	EAATNNLMK	[6] Deamidation N	Q7TNP2	2AAB_MOUSE Serine/threonine-protein phosphatase 2A 65 kDa regulatory subunit A beta isoform OS=Mus musculus GN=Ppp2r1b PE=1 SV=2
72.34_1138.5396n	1	#73356	2	72.336	1138.54	5.2782	LASGDWFTSR		Q7TNP2	2AAB_MOUSE Serine/threonine-protein phosphatase 2A 65 kDa regulatory subunit A beta isoform OS=Mus musculus GN=Ppp2r1b PE=1 SV=2
64.93_1138.5704n	1	#4564	2	64.9264	1138.57	5.4931	LASGDWFTSR		Q7TNP2	2AAB_MOUSE Serine/threonine-protein phosphatase 2A 65 kDa regulatory subunit A beta isoform OS=Mus musculus GN=Ppp2r1b PE=1 SV=2
72.47_1138.5930n	1	#17144	2	72.4732	1138.59	5.2782	LASGDWFTSR		Q7TNP2	2AAB_MOUSE Serine/threonine-protein phosphatase 2A 65 kDa regulatory subunit A beta isoform OS=Mus musculus GN=Ppp2r1b PE=1 SV=2
81.36_1241.7317n	1	#12606	2	81.3646	1241.73	8.5438	LSTIALALGVER		Q7TNP2	2AAB_MOUSE Serine/threonine-protein phosphatase 2A 65 kDa regulatory subunit A beta isoform OS=Mus musculus GN=Ppp2r1b PE=1 SV=2
81.21_1241.7346n	1	#43181	2	81.2102	1241.73	7.9089	LSTIALALGVER		Q7TNP2	2AAB_MOUSE Serine/threonine-protein phosphatase 2A 65 kDa regulatory subunit A beta isoform OS=Mus musculus GN=Ppp2r1b PE=1 SV=2
75.51_1369.8216n	1	#58526	2	75.512	1369.82	6.9581	KLSTIALALGVER		Q7TNP2	2AAB_MOUSE Serine/threonine-protein phosphatase 2A 65 kDa regulatory subunit A beta isoform OS=Mus musculus GN=Ppp2r1b PE=1 SV=2
75.62_1369.8217n	1	#85008	2	75.615	1369.82	6.4908	KLSTIALALGVER		Q7TNP2	2AAB_MOUSE Serine/threonine-protein phosphatase 2A 65 kDa regulatory subunit A beta isoform OS=Mus musculus GN=Ppp2r1b PE=1 SV=2
75.39_1369.8231n	1	#74569	2	75.3919	1369.82	7.0363	KLSTIALALGVER		Q7TNP2	2AAB_MOUSE Serine/threonine-protein phosphatase 2A 65 kDa regulatory subunit A beta isoform OS=Mus musculus GN=Ppp2r1b PE=1 SV=2
74.81_1369.8256n	1	#97825	2	74.814	1369.83	6.8882	KLSTIALALGVER		Q7TNP2	2AAB_MOUSE Serine/threonine-protein phosphatase 2A 65 kDa regulatory subunit A beta isoform OS=Mus musculus GN=Ppp2r1b PE=1 SV=2
46.71_1435.6964n	1	#100724	2	46.707	1435.7	5.5706	SLCSDDTPMVRR	[3] Carbamidomethyl C	Q7TNP2	2AAB_MOUSE Serine/threonine-protein phosphatase 2A 65 kDa regulatory subunit A beta isoform OS=Mus musculus GN=Ppp2r1b PE=1 SV=2
76.16_1516.7434n	1	#7027	2	76.1586	1516.74	7.7416	TSACGLFSVCYPR	[4] Carbamidomethyl C|[10] Carbamidomethyl C	Q7TNP2	2AAB_MOUSE Serine/threonine-protein phosphatase 2A 65 kDa regulatory subunit A beta isoform OS=Mus musculus GN=Ppp2r1b PE=1 SV=2
61.57_1540.7623n	1	#21662	3	61.5687	1540.76	6.1918	VLVMANDPNYLHR		Q7TNP2	2AAB_MOUSE Serine/threonine-protein phosphatase 2A 65 kDa regulatory subunit A beta isoform OS=Mus musculus GN=Ppp2r1b PE=1 SV=2
72.63_1540.7653n	1	#74313	3	72.6277	1540.77	5.3243	VLVMANDPNYLHR		Q7TNP2	2AAB_MOUSE Serine/threonine-protein phosphatase 2A 65 kDa regulatory subunit A beta isoform OS=Mus musculus GN=Ppp2r1b PE=1 SV=2
93.94_1540.7750n	1	#21230	2	93.9377	1540.77	5.8247	VLVMANDPNYLHR		Q7TNP2	2AAB_MOUSE Serine/threonine-protein phosphatase 2A 65 kDa regulatory subunit A beta isoform OS=Mus musculus GN=Ppp2r1b PE=1 SV=2
96.96_1941.0031n	1	#22693	2	96.9576	1941	8.1166	LNIISNLDCVNEVIGIR	[9] Carbamidomethyl C	Q7TNP2	2AAB_MOUSE Serine/threonine-protein phosphatase 2A 65 kDa regulatory subunit A beta isoform OS=Mus musculus GN=Ppp2r1b PE=1 SV=2
88.42_2132.1845n	2	#55803,#120751	3,4	88.4211	2132.18	4.766	IGPILDTNALQGEVKPVLQK		Q7TNP2	2AAB_MOUSE Serine/threonine-protein phosphatase 2A 65 kDa regulatory subunit A beta isoform OS=Mus musculus GN=Ppp2r1b PE=1 SV=2
78.53_2242.2200n	1	#57848	4	78.5327	2242.22	4.8122	QISQEHTPVALEAHFVPLVK		Q7TNP2	2AAB_MOUSE Serine/threonine-protein phosphatase 2A 65 kDa regulatory subunit A beta isoform OS=Mus musculus GN=Ppp2r1b PE=1 SV=2
102.45_2588.4645n	1	#12574	3	102.454	2588.46	5.0026	SLQKIGPILDTNALQGEVKPVLQK		Q7TNP2	2AAB_MOUSE Serine/threonine-protein phosphatase 2A 65 kDa regulatory subunit A beta isoform OS=Mus musculus GN=Ppp2r1b PE=1 SV=2
93.90_2826.3339n	1	#23890	4	93.9034	2826.33	6.7801	DECPEVRLNIISNLDCVNEVIGIR	[3] Carbamidomethyl C|[16] Carbamidomethyl C	Q7TNP2	2AAB_MOUSE Serine/threonine-protein phosphatase 2A 65 kDa regulatory subunit A beta isoform OS=Mus musculus GN=Ppp2r1b PE=1 SV=2
54.61_3017.5384n	1	#29901	5	54.607	3017.54	4.4372	VLELDSVKTEIVPLFTNLASDEQDSVR	[17] Deamidation N	Q7TNP2	2AAB_MOUSE Serine/threonine-protein phosphatase 2A 65 kDa regulatory subunit A beta isoform OS=Mus musculus GN=Ppp2r1b PE=1 SV=2
75.99_769.3656n	1	#35538	2	75.9871	769.366	4.6252	IQSHSR	[N-term] Acetyl N-TERM|[2] Deamidation Q	Q6P1F6	2ABA_MOUSE Serine/threonine-protein phosphatase 2A 55 kDa regulatory subunit B alpha isoform OS=Mus musculus GN=Ppp2r2a PE=1 SV=1
37.18_910.3971n	1	#4665	2	37.1823	910.397	5.3742	MFDRNTK		Q6P1F6	2ABA_MOUSE Serine/threonine-protein phosphatase 2A 55 kDa regulatory subunit B alpha isoform OS=Mus musculus GN=Ppp2r2a PE=1 SV=1
37.30_910.4231n	1	#86810	2	37.3025	910.423	5.3742	MFDRNTK		Q6P1F6	2ABA_MOUSE Serine/threonine-protein phosphatase 2A 55 kDa regulatory subunit B alpha isoform OS=Mus musculus GN=Ppp2r2a PE=1 SV=1
92.23_1243.6647n	1	#86259	2	92.2332	1243.66	5.023	SLEIEEKINK	[N-term] Acetyl N-TERM	Q6P1F6	2ABA_MOUSE Serine/threonine-protein phosphatase 2A 55 kDa regulatory subunit B alpha isoform OS=Mus musculus GN=Ppp2r2a PE=1 SV=1
68.03_1320.6625n	1	#8167	2	68.0334	1320.66	7.7765	NAAQFLLSTNDK		Q6P1F6	2ABA_MOUSE Serine/threonine-protein phosphatase 2A 55 kDa regulatory subunit B alpha isoform OS=Mus musculus GN=Ppp2r2a PE=1 SV=1
50.75_1321.6975n	1	#79147	3	50.7514	1321.7	6.3683	YRDPTTVTTLR		Q6P1F6	2ABA_MOUSE Serine/threonine-protein phosphatase 2A 55 kDa regulatory subunit B alpha isoform OS=Mus musculus GN=Ppp2r2a PE=1 SV=1
67.22_1322.6381n	1	#52838	2	67.215	1322.64	5.5554	NAAQFLLSTNDK	[1] Deamidation N|[10] Deamidation N	Q6P1F6	2ABA_MOUSE Serine/threonine-protein phosphatase 2A 55 kDa regulatory subunit B alpha isoform OS=Mus musculus GN=Ppp2r2a PE=1 SV=1
79.63_1362.6791n	1	#14778	2	79.6255	1362.68	5.7707	NAAQFLLSTNDK	[N-term] Acetyl N-TERM	Q6P1F6	2ABA_MOUSE Serine/threonine-protein phosphatase 2A 55 kDa regulatory subunit B alpha isoform OS=Mus musculus GN=Ppp2r2a PE=1 SV=1
74.16_1380.6432n	1	#6893	2	74.162	1380.64	5.5667	DEISVDSLDFNK		Q6P1F6	2ABA_MOUSE Serine/threonine-protein phosphatase 2A 55 kDa regulatory subunit B alpha isoform OS=Mus musculus GN=Ppp2r2a PE=1 SV=1
65.97_1381.6224n	1	#17619	2	65.9675	1381.62	5.6199	DEISVDSLDFNK	[11] Deamidation N	Q6P1F6	2ABA_MOUSE Serine/threonine-protein phosphatase 2A 55 kDa regulatory subunit B alpha isoform OS=Mus musculus GN=Ppp2r2a PE=1 SV=1
81.38_1408.7460n	1	#67142	3	81.3818	1408.75	6.223	INLWHLEITDR		Q6P1F6	2ABA_MOUSE Serine/threonine-protein phosphatase 2A 55 kDa regulatory subunit B alpha isoform OS=Mus musculus GN=Ppp2r2a PE=1 SV=1
81.86_1408.7468n	1	#62664	3	81.8627	1408.75	6.3964	INLWHLEITDR		Q6P1F6	2ABA_MOUSE Serine/threonine-protein phosphatase 2A 55 kDa regulatory subunit B alpha isoform OS=Mus musculus GN=Ppp2r2a PE=1 SV=1
65.66_1508.7103n	1	#8257	2	65.6643	1508.71	6.1274	DEISVDSLDFNKK		Q6P1F6	2ABA_MOUSE Serine/threonine-protein phosphatase 2A 55 kDa regulatory subunit B alpha isoform OS=Mus musculus GN=Ppp2r2a PE=1 SV=1
65.65_1508.7160n	1	#11296	2	65.6471	1508.72	6.1274	DEISVDSLDFNKK		Q6P1F6	2ABA_MOUSE Serine/threonine-protein phosphatase 2A 55 kDa regulatory subunit B alpha isoform OS=Mus musculus GN=Ppp2r2a PE=1 SV=1
91.06_1663.8787n	1	#92632	3	91.055	1663.88	5.3834	NAAQFLLSTNDKTIK	[1] Deamidation N	Q6P1F6	2ABA_MOUSE Serine/threonine-protein phosphatase 2A 55 kDa regulatory subunit B alpha isoform OS=Mus musculus GN=Ppp2r2a PE=1 SV=1
[truncated: 42,555 more rows]

## Sheet: terminology
Peptide identifier	<retention time>_<neutral mass>
[truncated: 11 more rows]
