# Supplementary material for: Spatial proteomic alterations detected via MALDI-MS imaging implicate neuronal loss in a Huntington's disease mouse (YAC128) brain
Source: Royal Society of Chemistry journal article supplement (doi:10.1039/d1mo00440a), 2022-02-07
Supplement: d1mo00440a3.xlsx [file d1mo00440a3.xlsx]

## Sheet: mz values (after data binning)
R1	R2	R3	R4
699.904	708.949	706.282	708.949
702.285	714.93	708.949	714.93
702.88	721.62	714.93	721.62
705.289	726.962	721.62	726.962
706.282	727.301	726.962	727.301
708.949	728.945	727.301	728.945
709.239	758.846	728.945	758.846
714.93	759.366	758.846	759.366
719.886	770.891	759.366	770.891
721.62	781.306	770.891	781.306
725.882	786.361	781.306	786.361
726.9	788.342	786.361	788.342
727.301	815.404	788.342	815.404
727.324	817.369	815.404	817.369
727.893	842.646	817.369	842.646
728.901	845.386	842.646	845.386
731.324	856.446	845.386	856.446
738.253	857.463	856.446	857.463
742.87	858.421	857.463	858.421
743.869	861.387	858.421	861.387
744.217	866.625	861.387	866.625
758.843	870.466	866.425	870.466
760.294	873.429	870.466	873.429
765.825	878.282	873.429	878.282
770.891	885.449	878.282	885.449
781.306	901.444	885.449	901.444
786.361	903.442	901.444	903.442
788.342	914.485	903.442	914.485
801.362	915.467	914.485	915.467
815.357	917.344	915.467	917.344
817.369	930.483	917.344	930.333
826.865	932.466	930.333	932.466
828.389	933.463	932.466	933.463
834.678	944.485	933.463	944.485
837.045	952.465	944.485	952.465
842.646	958.483	952.725	958.483
844.403	968.624	958.483	968.422
850.339	969.425	968.624	968.625
856.446	969.446	969.425	969.446
858.446	972.506	969.446	972.54
861.362	976.407	972.54	976.407
861.387	985.303	976.407	985.303
862.807	989.467	985.303	989.467
865.686	990.442	989.467	990.442
870.465	1015.54	990.442	1015.54
873.429	1024.49	1015.54	1024.49
878.282	1026.49	1024.49	1026.5
885.425	1026.5	1026.49	1029.55
886.426	1029.55	1026.5	1030.51
887.425	1030.51	1029.55	1030.56
899.385	1047.48	1030.51	1047.48
899.424	1054.51	1047.48	1054.51
901.444	1057.53	1054.51	1057.53
909.434	1058.53	1057.53	1058.53
914.485	1068.48	1058.53	1068.48
915.465	1069.46	1068.48	1069.46
930.483	1075.5	1069.46	1075.5
932.466	1077.51	1075.5	1077.51
933.463	1092.55	1077.51	1092.55
943.503	1102.54	1092.55	1102.54
944.44	1115.59	1102.54	1115.56
946.484	1121.55	1115.56	1121.55
952.725	1122.54	1121.55	1122.54
953.443	1131.54	1122.54	1131.54
954.441	1132.53	1131.54	1132.53
957.464	1143.59	1132.53	1143.59
959.283	1144.59	1143.59	1144.59
966.327	1146.54	1144.79	1146.54
968.624	1153.51	1146.54	1153.51
969.423	1153.52	1153.51	1153.52
969.445	1154.54	1153.52	1154.54
970.349	1156.57	1154.54	1156.6
972.54	1156.6	1156.57	1159.58
976.407	1165.57	1156.59	1165.57
977.39	1176.58	1159.58	1174.6
985.303	1177.58	1165.57	1176.58
988.445	1178.6	1176.58	1177.58
989.466	1179.53	1177.58	1179.53
990.441	1180.53	1179.53	1180.53
993.465	1185.59	1185.59	1185.59
1006.44	1192.45	1192.45	1192.57
1015.5	1193.56	1193.56	1193.56
1015.54	1194.57	1194.57	1194.57
1025.44	1198.93	1198.93	1198.63
1026.49	1214.57	1214.57	1214.57
1028.54	1215.59	1215.49	1215.59
1029.55	1221.42	1221.56	1221.56
1030.56	1232.61	1232.61	1232.64
1032.5	1255.58	1255.58	1256.61
1032.53	1256.61	1256.61	1303.67
1044.55	1303.67	1303.67	1334.64
1047.48	1334.64	1334.64	1336.63
1054.51	1336.63	1336.63	1337.98
1057.53	1337.98	1337.62	1338.66
1057.56	1338.61	1338.66	1397.11
1058.53	1397.11	1397.11	1420.21
1065.56	1420.2	1420.2	1422.76
1067.53	1422.76	1422.76	1423.76
1069.46	1423.76	1423.76	1423.79
1075.5	1423.79	1444.76	1444.76
1100.55	1484.78	1484.78	1484.78
1101.52	1485.77	1485.77	1485.77
1114.55	1506.78	1506.78	1506.78
1115.59	1507.78	1507.78	1507.78
1121.55	1551.76	1551.76	1551.76
1122.54	1552.76	1552.76	1552.76
1122.54	1553.76	1553.76	1553.76
1131.52	1696.85	1696.85	1696.85
1144.79	1697.88	1697.88	1697.88
1146.54	1698.58	1698.58	1698.58
1154.52	2189.68	2189.68	2189.94
1156.59	2191.83	2191.83	2191.83
1156.6
1157.57
1157.59
1158.58
1159.58
1174.6
1176.57
1176.58
1177.58
1178.6
1179.53
1185.6
1186.59
1193.36
1198.63
1214.57
1215.59
1221.42
1232.64
1256.61
1303.67
1334.64
1336.63
1337.98
1338.62
1338.66
1396.69
1397.11
1423.76
1423.79
1484.78
1485.77
1506.78
1507.78
1551.76
1552.76
1553.76
1696.85
1697.88
1698.58
2189.68
2191.83

## Sheet: mz values (d>0.8 and p<0.05)
R1	R2	R3	R4
705.289	708.949	706.282	708.949
708.949	721.62	708.949	721.62
709.239	758.846	714.93	758.846
719.886	770.891	721.62	842.646
721.62	842.646	728.945	866.625
725.882	866.625	758.846	878.282
727.893	878.282	770.891	914.485
728.901	914.485	842.646	917.344
738.253	917.344	878.282	930.333
743.869	933.463	914.485	933.463
744.217	968.624	917.344	968.422
758.843	985.303	930.333	968.62
760.294	1015.54	933.463	972.54
770.891	1026.5	952.725	985.303
815.357	1029.55	968.624	1015.54
826.865	1115.59	972.54	1026.5
834.678	1156.6	985.303	1030.56
837.045	1178.6	1015.54	1156.6
842.646	1192.45	1026.5	1159.58
862.807	1198.93	1144.79	1174.6
865.686	1221.42	1159.58	1232.64
878.282	1303.67	1192.45	1303.67
899.385	1337.98	1198.93	1337.98
909.434	1397.11	1215.49	1338.66
914.485	1420.2	1303.67	1397.11
933.463	1422.76	1338.66	1420.21
952.725	1423.79	1397.11	1422.76
959.283	1698.58	1420.2	1423.79
966.327	2189.68	1422.76	1444.76
968.624	2191.83	1444.76	1698.58
970.349		1698.58	2191.83
972.54		2189.68
977.39		2191.83
985.303
1006.44
1015.54
1030.56
1044.55
1057.56
1065.56
1067.53
1115.59
1144.79
1156.6
1158.58
1159.58
1174.6
1178.6
1193.36
1221.42
1232.64
1303.67
1337.98
1338.66
1397.11
1423.79
1698.58
2189.68
2191.83

## Sheet: R1 region_identified proteins
Detection	MALDI-MSI Observed m/z	LC-MS/MS protonated m/z	Matching error (ppm)	Sequence	Modifications	Accession	Description
tissue lysate	705.289	705.396	-151.688	VISMQK		Q04447	KCRB_MOUSE Creatine kinase B-type OS=Mus musculus GN=Ckb PE=1 SV=1
tissue lysate on-tissue digestion	708.949	708.477	666.736	IIIPPR		G5E8K5	ANK3_MOUSE Ankyrin-3 OS=Mus musculus GN=Ank3 PE=1 SV=1
tissue lysate	709.239	709.34	-142.245	VVDTEF		Q04735	CDK16_MOUSE Cyclin-dependent kinase 16 OS=Mus musculus GN=Cdk16 PE=1 SV=1
tissue lysate	719.886	719.445	613.528	ALQFLK		P15508	SPTB1_MOUSE Spectrin beta chain_ erythrocytic OS=Mus musculus GN=Sptb PE=1 SV=4
tissue lysate	721.62	721.424	271.13	FEGLKK		P19639	GSTM3_MOUSE Glutathione S-transferase Mu 3 OS=Mus musculus GN=Gstm3 PE=1 SV=2
tissue lysate	725.882	725.503	521.983	IPVLKR		Q6PIC6	AT1A3_MOUSE Sodium/potassium-transporting ATPase subunit alpha-3 OS=Mus musculus GN=Atp1a3 PE=1 SV=1
tissue lysate	727.893	727.508	529.273	ALVILAK		Q99LX0	PARK7_MOUSE Protein/nucleic acid deglycase DJ-1 OS=Mus musculus GN=Park7 PE=1 SV=1
tissue lysate	728.901	728.503	547.012	LLIKGGK		O35098	DPYL4_MOUSE Dihydropyrimidinase-related protein 4 OS=Mus musculus GN=Dpysl4 PE=1 SV=1
tissue lysate	738.253	738.403	-202.87	ISDLYK		P15508	SPTB1_MOUSE Spectrin beta chain_ erythrocytic OS=Mus musculus GN=Sptb PE=1 SV=4
tissue lysate	743.869	743.466	541.652	VAILAEK		P17427	AP2A2_MOUSE AP-2 complex subunit alpha-2 OS=Mus musculus GN=Ap2a2 PE=1 SV=2
tissue lysate	744.217	744.342	-167.262	MMATYK		Q9CQA3	SDHB_MOUSE Succinate dehydrogenase [ubiquinone] iron-sulfur subunit_ mitochondrial OS=Mus musculus GN=Sdhb PE=1 SV=1
tissue lysate	758.843	758.477	482.81	VGIKVDK		P05064	ALDOA_MOUSE Fructose-bisphosphate aldolase A OS=Mus musculus GN=Aldoa PE=1 SV=2
tissue lysate	760.294	760.351	-75.6887	SSEFYK		Q9CRB9	MIC19_MOUSE MICOS complex subunit Mic19 OS=Mus musculus GN=Chchd3 PE=1 SV=1
tissue lysate	770.891	770.42	612.394	TSFLFR		P35276	RAB3D_MOUSE Ras-related protein Rab-3D OS=Mus musculus GN=Rab3d PE=1 SV=1
tissue lysate	815.357	815.431	-90.3816	HFWGLR		P62270	RS18_MOUSE 40S ribosomal protein S18 OS=Mus musculus GN=Rps18 PE=1 SV=3
tissue lysate	826.865	826.551	379.892	VVLVLAGR		P61358	RL27_MOUSE 60S ribosomal protein L27 OS=Mus musculus GN=Rpl27 PE=1 SV=2
tissue lysate	834.678	834.545	159.189	KILGYIK		P47738	ALDH2_MOUSE Aldehyde dehydrogenase_ mitochondrial OS=Mus musculus GN=Aldh2 PE=1 SV=1
tissue lysate	837.045	837.32	-327.474	IHEGCEE	[5] Carbamidomethyl C	Q68FD5	CLH1_MOUSE Clathrin heavy chain 1 OS=Mus musculus GN=Cltc PE=1 SV=3
tissue lysate	842.646	842.546	119.23	VQIINKK		P10637	TAU_MOUSE Microtubule-associated protein tau OS=Mus musculus GN=Mapt PE=1 SV=3
tissue lysate	862.807	862.503	351.767	LIFDNLK		Q9WV27	AT1A4_MOUSE Sodium/potassium-transporting ATPase subunit alpha-4 OS=Mus musculus GN=Atp1a4 PE=1 SV=3
tissue lysate	865.686	865.514	198.726	GKLYSLGK		P16330	CN37_MOUSE 2'_3'-cyclic-nucleotide 3'-phosphodiesterase OS=Mus musculus GN=Cnp PE=1 SV=3
tissue lysate	878.282	878.367	-96.9412	DCEAEVR	[2] Carbamidomethyl C	Q76MZ3	2AAA_MOUSE Serine/threonine-protein phosphatase 2A 65 kDa regulatory subunit A alpha isoform OS=Mus musculus GN=Ppp2r1a PE=1 SV=3
on-tissue digestion	899.385	899.426	-45.7514	FQPGAPEGP		Q63844	MK03_MOUSE Mitogen-activated protein kinase 3 OS=Mus musculus OX=10090 GN=Mapk3 PE=1 SV=5
tissue lysate	909.434	909.425	9.93302	MFDVGGQR		B2RSH2	GNAI1_MOUSE Guanine nucleotide-binding protein G(i) subunit alpha-1 OS=Mus musculus GN=Gnai1 PE=1 SV=1
tissue lysate	914.485	914.473	12.6541	GSPFHELK		Q8BX70	VP13C_MOUSE Vacuolar protein sorting-associated protein 13C OS=Mus musculus GN=Vps13c PE=1 SV=2
tissue lysate	933.463	933.471	-8.49875	CIVVEEGK	[1] Carbamidomethyl C	Q9R0P5	DEST_MOUSE Destrin OS=Mus musculus GN=Dstn PE=1 SV=3
tissue lysate	952.725	952.619	111.342	VPLILVGNK		Q8BU31	RAP2C_MOUSE Ras-related protein Rap-2c OS=Mus musculus GN=Rap2c PE=1 SV=1
tissue lysate	959.283	959.462	-186.407	DVMPEVNR		P06745	G6PI_MOUSE Glucose-6-phosphate isomerase OS=Mus musculus GN=Gpi PE=1 SV=4
tissue lysate	966.327	966.443	-119.407	FGQWADSR		Q9Z2Y3	HOME1_MOUSE Homer protein homolog 1 OS=Mus musculus GN=Homer1 PE=1 SV=2
tissue lysate on-tissue digestion	968.624	968.553	73.8215	LGPLVEQGR		P08226	APOE_MOUSE Apolipoprotein E OS=Mus musculus OX=10090 GN=Apoe PE=1 SV=2
tissue lysate	970.349	970.419	-71.5155	DLFDSMDK		Q9JMA1	UBP14_MOUSE Ubiquitin carboxyl-terminal hydrolase 14 OS=Mus musculus GN=Usp14 PE=1 SV=3
tissue lysate	972.54	972.522	17.9787	GLDRINER		P63328	PP2BA_MOUSE Serine/threonine-protein phosphatase 2B catalytic subunit alpha isoform OS=Mus musculus GN=Ppp3ca PE=1 SV=1
tissue lysate	977.39	977.453	-64.9647	SEDGETLAR		Q9JKM7	RAB37_MOUSE Ras-related protein Rab-37 OS=Mus musculus GN=Rab37 PE=1 SV=2
tissue lysate	985.303	985.456	-154.852	QMAFDFAR		Q61548	AP180_MOUSE Clathrin coat assembly protein AP180 OS=Mus musculus GN=Snap91 PE=1 SV=1
tissue lysate	1006.44	1006.49	-50.6713	KCEEELAK	[2] Carbamidomethyl C	Q61768	KINH_MOUSE Kinesin-1 heavy chain OS=Mus musculus GN=Kif5b PE=1 SV=3
tissue lysate on-tissue digestion	1015.54	1015.55	-17.0441	SAAEVIAQAR		O08553	DPYL2_MOUSE Dihydropyrimidinase-related protein 2 OS=Mus musculus OX=10090 GN=Dpysl2 PE=1 SV=2
tissue lysate on-tissue digestion	1030.56	1030.54	16.3025	IAENVEEVK		O35526	STX1A_MOUSE Syntaxin-1A OS=Mus musculus OX=10090 GN=Stx1a PE=1 SV=3
tissue lysate	1044.55	1044.55	-0.544258	SGIIFAGHDK		Q8BLK3	LSAMP_MOUSE Limbic system-associated membrane protein OS=Mus musculus GN=Lsamp PE=1 SV=1
tissue lysate	1057.56	1057.56	-0.833055	MVGRVQPDR		Q8BLK3	LSAMP_MOUSE Limbic system-associated membrane protein OS=Mus musculus GN=Lsamp PE=1 SV=1
tissue lysate	1065.56	1065.56	-0.841972	KIYEEEVR		P03995	GFAP_MOUSE Glial fibrillary acidic protein OS=Mus musculus GN=Gfap PE=1 SV=4
tissue lysate	1067.53	1067.53	-1.16406	DLMPHDLAR		Q99JY0	ECHB_MOUSE Trifunctional enzyme subunit beta_ mitochondrial OS=Mus musculus GN=Hadhb PE=1 SV=1
tissue lysate	1115.59	1115.57	18.2612	ATLPDADKER		Q7TPR4	ACTN1_MOUSE Alpha-actinin-1 OS=Mus musculus GN=Actn1 PE=1 SV=1
tissue lysate	1144.79	1144.66	113.746	LNSLSIPSVSK		P49070	CAMLG_MOUSE Calcium signal-modulating cyclophilin ligand OS=Mus musculus GN=Camlg PE=1 SV=2
tissue lysate	1156.6	1156.62	-9.02687	HPEPFFALAK		Q8VDQ8	SIR2_MOUSE NAD-dependent protein deacetylase sirtuin-2 OS=Mus musculus GN=Sirt2 PE=1 SV=2
tissue lysate	1158.58	1158.59	-5.03486	IDIDPEETVK		P54728	RD23B_MOUSE UV excision repair protein RAD23 homolog B OS=Mus musculus GN=Rad23b PE=1 SV=2
tissue lysate	1159.58	1159.6	-13.2134	REEVLEEGAK		Q9QYR6	MAP1A_MOUSE Microtubule-associated protein 1A OS=Mus musculus GN=Map1a PE=1 SV=2
tissue lysate on-tissue digestion	1174.6	1174.6	0.532096	NSLLNEDLEK		Q61644	PACN1_MOUSE Protein kinase C and casein kinase substrate in neurons protein 1 OS=Mus musculus GN=Pacsin1 PE=1 SV=1
tissue lysate on-tissue digestion	1178.6	1178.57	23.1842	GESAMLVENTK		Q99P72	RTN4_MOUSE Reticulon-4 OS=Mus musculus GN=Rtn4 PE=1 SV=2
tissue lysate	1193.36	1193.53	-136.375	DGNDLHMTYK		Q9QYJ0	DNJA2_MOUSE DnaJ homolog subfamily A member 2 OS=Mus musculus GN=Dnaja2 PE=1 SV=1
tissue lysate	1221.42	1221.55	-105.137	DAAQSSPAFGDR		P10518	HEM2_MOUSE Delta-aminolevulinic acid dehydratase OS=Mus musculus GN=Alad PE=1 SV=1
on-tissue digestion	1232.64	1232.6	29.4196	EIGQSVDEVEK		Q62261	SPTB2_MOUSE Spectrin beta chain_ non-erythrocytic 1 OS=Mus musculus OX=10090 GN=Sptbn1 PE=1 SV=2
tissue lysate	1303.67	1303.67	-3.84705	TANASLEEIIDK		Q8BX70	VP13C_MOUSE Vacuolar protein sorting-associated protein 13C OS=Mus musculus GN=Vps13c PE=1 SV=2
tissue lysate	1337.98	1337.86	94.6041	AIIIFVPVPQLK		P62082	RS7_MOUSE 40S ribosomal protein S7 OS=Mus musculus GN=Rps7 PE=2 SV=1
tissue lysate	1338.66	1338.64	13.8986	DYIWNTLNSGR		Q9CZU6	CISY_MOUSE Citrate synthase_ mitochondrial OS=Mus musculus GN=Cs PE=1 SV=1
tissue lysate	1397.11	1396.84	193.745	ILFRPVASQLPR		P67778	PHB_MOUSE Prohibitin OS=Mus musculus GN=Phb PE=1 SV=1
tissue lysate	1423.79	1423.78	1.84953	LFQVEYAIEAIK		Q9Z2U1	PSA5_MOUSE Proteasome subunit alpha type-5 OS=Mus musculus GN=Psma5 PE=1 SV=1
tissue lysate	1698.58	1698.74	-95.7119	MIVECVMNNATCTR	[5] Carbamidomethyl C [12] Carbamidomethyl C	Q05816	FABP5_MOUSE Fatty acid-binding protein_ epidermal OS=Mus musculus GN=Fabp5 PE=1 SV=3
tissue lysate on-tissue digestion	2189.68	2189.91	-104.571	NMGGPYGGGNYGPGGSGGSGGYGGR		O88569	ROA2_MOUSE Heterogeneous nuclear ribonucleoproteins A2/B1 OS=Mus musculus GN=Hnrnpa2b1 PE=1 SV=2
tissue lysate	2191.83	2192.03	-93.5889	AGYTDQVVIGMDVAASEFYR		P17182	ENOA_MOUSE Alpha-enolase OS=Mus musculus GN=Eno1 PE=1 SV=3

## Sheet: R2 region_identified proteins
Detection	MALDI-MSI Observed m/z	LC-MS/MS protonated m/z	Matching error (ppm)	Sequence	Modifications	Accession	Description
tissue lysate on-tissue digestion	708.949	708.477	666.736	IIIPPR		G5E8K5	ANK3_MOUSE Ankyrin-3 OS=Mus musculus GN=Ank3 PE=1 SV=1
tissue lysate	721.62	721.424	271.13	FEGLKK		P19639	GSTM3_MOUSE Glutathione S-transferase Mu 3 OS=Mus musculus GN=Gstm3 PE=1 SV=2
tissue lysate	758.846	758.477	486.897	VGIKVDK		P05064	ALDOA_MOUSE Fructose-bisphosphate aldolase A OS=Mus musculus GN=Aldoa PE=1 SV=2
tissue lysate	770.891	770.42	612.394	TSFLFR		P35276	RAB3D_MOUSE Ras-related protein Rab-3D OS=Mus musculus GN=Rab3d PE=1 SV=1
tissue lysate	842.646	842.546	119.23	VQIINKK		P10637	TAU_MOUSE Microtubule-associated protein tau OS=Mus musculus GN=Mapt PE=1 SV=3
tissue lysate	866.625	866.498	146.028	FVIATSTK		P47911	RL6_MOUSE 60S ribosomal protein L6 OS=Mus musculus GN=Rpl6 PE=1 SV=3
tissue lysate	878.282	878.367	-96.9412	DCEAEVR	[2] Carbamidomethyl C	Q76MZ3	2AAA_MOUSE Serine/threonine-protein phosphatase 2A 65 kDa regulatory subunit A alpha isoform OS=Mus musculus GN=Ppp2r1a PE=1 SV=3
tissue lysate	914.485	914.473	12.6541	GSPFHELK		Q8BX70	VP13C_MOUSE Vacuolar protein sorting-associated protein 13C OS=Mus musculus GN=Vps13c PE=1 SV=2
tissue lysate	917.344	917.425	-88.586	ESYDYLK		Q9QZ88	VPS29_MOUSE Vacuolar protein sorting-associated protein 29 OS=Mus musculus GN=Vps29 PE=1 SV=1
tissue lysate	933.463	933.471	-8.49875	CIVVEEGK	[1] Carbamidomethyl C	Q9R0P5	DEST_MOUSE Destrin OS=Mus musculus GN=Dstn PE=1 SV=3
tissue lysate on-tissue digestion	968.624	968.553	73.8215	LGPLVEQGR		P08226	APOE_MOUSE Apolipoprotein E OS=Mus musculus OX=10090 GN=Apoe PE=1 SV=2
tissue lysate	985.303	985.456	-154.852	QMAFDFAR		Q61548	AP180_MOUSE Clathrin coat assembly protein AP180 OS=Mus musculus GN=Snap91 PE=1 SV=1
tissue lysate on-tissue digestion	1015.54	1015.55	-17.0441	SAAEVIAQAR		O08553	DPYL2_MOUSE Dihydropyrimidinase-related protein 2 OS=Mus musculus OX=10090 GN=Dpysl2 PE=1 SV=2
on-tissue digestion	1026.5	1026.5	-2.89007	MNTSFTRK	[N-term] Acetyl N-TERM	P16330	CN37_MOUSE 2'_3'-cyclic-nucleotide 3'-phosphodiesterase OS=Mus musculus OX=10090 GN=Cnp PE=1 SV=3
tissue lysate	1029.55	1029.55	4.01471	WLAIDANAR		P70168	IMB1_MOUSE Importin subunit beta-1 OS=Mus musculus GN=Kpnb1 PE=1 SV=2
tissue lysate	1115.59	1115.57	18.2612	ATLPDADKER		Q7TPR4	ACTN1_MOUSE Alpha-actinin-1 OS=Mus musculus GN=Actn1 PE=1 SV=1
tissue lysate	1156.6	1156.62	-9.02687	HPEPFFALAK		Q8VDQ8	SIR2_MOUSE NAD-dependent protein deacetylase sirtuin-2 OS=Mus musculus GN=Sirt2 PE=1 SV=2
tissue lysate on-tissue digestion	1178.6	1178.57	23.1842	GESAMLVENTK		Q99P72	RTN4_MOUSE Reticulon-4 OS=Mus musculus GN=Rtn4 PE=1 SV=2
tissue lysate on-tissue digestion	1192.45	1192.56	-94.3015	ISEEEELDTK		Q62048	PEA15_MOUSE Astrocytic phosphoprotein PEA-15 OS=Mus musculus OX=10090 GN=Pea15 PE=1 SV=1
tissue lysate	1198.93	1198.75	146.844	ELISKILLNR		P22599	A1AT2_MOUSE Alpha-1-antitrypsin 1-2 OS=Mus musculus GN=Serpina1b PE=1 SV=2
tissue lysate	1221.42	1221.55	-105.137	DAAQSSPAFGDR		P10518	HEM2_MOUSE Delta-aminolevulinic acid dehydratase OS=Mus musculus GN=Alad PE=1 SV=1
tissue lysate	1303.67	1303.67	-3.84705	TANASLEEIIDK		Q8BX70	VP13C_MOUSE Vacuolar protein sorting-associated protein 13C OS=Mus musculus GN=Vps13c PE=1 SV=2
tissue lysate	1337.98	1337.86	93.605	AIIIFVPVPQLK		P62082	RS7_MOUSE 40S ribosomal protein S7 OS=Mus musculus GN=Rps7 PE=2 SV=1
tissue lysate	1397.11	1396.84	195.154	ILFRPVASQLPR		P67778	PHB_MOUSE Prohibitin OS=Mus musculus GN=Phb PE=1 SV=1
tissue lysate	1420.2	1419.78	295.503	SQTDQLVLIFAGK		Q9QZM0	UBQL2_MOUSE Ubiquilin-2 OS=Mus musculus GN=Ubqln2 PE=1 SV=2
tissue lysate	1422.76	1422.77	-6.98167	ATGTPPPQINWLK		D3YXG0	HMCN1_MOUSE Hemicentin-1 OS=Mus musculus GN=Hmcn1 PE=1 SV=1
tissue lysate	1423.79	1423.78	1.84953	LFQVEYAIEAIK		Q9Z2U1	PSA5_MOUSE Proteasome subunit alpha type-5 OS=Mus musculus GN=Psma5 PE=1 SV=1
tissue lysate	1698.58	1698.74	-95.553	MIVECVMNNATCTR	[5] Carbamidomethyl C [12] Carbamidomethyl C	Q05816	FABP5_MOUSE Fatty acid-binding protein_ epidermal OS=Mus musculus GN=Fabp5 PE=1 SV=3
tissue lysate on-tissue digestion	2189.68	2189.91	-104.571	NMGGPYGGGNYGPGGSGGSGGYGGR		O88569	ROA2_MOUSE Heterogeneous nuclear ribonucleoproteins A2/B1 OS=Mus musculus GN=Hnrnpa2b1 PE=1 SV=2
tissue lysate	2191.83	2192.03	-93.5889	AGYTDQVVIGMDVAASEFYR		P17182	ENOA_MOUSE Alpha-enolase OS=Mus musculus GN=Eno1 PE=1 SV=3

## Sheet: R3 region_identified proteins
Detection	MALDI-MSI Observed m/z	LC-MS/MS protonated m/z	Matching error (ppm)	Sequence	Modifications	Accession	Description
tissue lysate	706.282	706.363	-115.309	GVHSHK	[N-term] Acetyl N-TERM	P62751	RL23A_MOUSE 60S ribosomal protein L23a OS=Mus musculus GN=Rpl23a PE=1 SV=1
tissue lysate on-tissue digestion	708.949	708.477	666.736	IIIPPR		G5E8K5	ANK3_MOUSE Ankyrin-3 OS=Mus musculus GN=Ank3 PE=1 SV=1
tissue lysate	714.93	715.356	-594.39	PPASMGR		Q61598	GDIB_MOUSE Rab GDP dissociation inhibitor beta OS=Mus musculus GN=Gdi2 PE=1 SV=1
tissue lysate	721.62	721.424	271.13	FEGLKK		P19639	GSTM3_MOUSE Glutathione S-transferase Mu 3 OS=Mus musculus GN=Gstm3 PE=1 SV=2
tissue lysate	728.945	728.503	607.181	LLIKGGK		O35098	DPYL4_MOUSE Dihydropyrimidinase-related protein 4 OS=Mus musculus GN=Dpysl4 PE=1 SV=1
tissue lysate	758.846	758.477	486.897	VGIKVDK		P05064	ALDOA_MOUSE Fructose-bisphosphate aldolase A OS=Mus musculus GN=Aldoa PE=1 SV=2
tissue lysate	770.891	770.42	612.394	TSFLFR		P35276	RAB3D_MOUSE Ras-related protein Rab-3D OS=Mus musculus GN=Rab3d PE=1 SV=1
tissue lysate	842.646	842.546	119.23	VQIINKK		P10637	TAU_MOUSE Microtubule-associated protein tau OS=Mus musculus GN=Mapt PE=1 SV=3
tissue lysate	878.282	878.367	-96.9412	DCEAEVR	[2] Carbamidomethyl C	Q76MZ3	2AAA_MOUSE Serine/threonine-protein phosphatase 2A 65 kDa regulatory subunit A alpha isoform OS=Mus musculus GN=Ppp2r1a PE=1 SV=3
tissue lysate	914.485	914.473	12.6541	GSPFHELK		Q8BX70	VP13C_MOUSE Vacuolar protein sorting-associated protein 13C OS=Mus musculus GN=Vps13c PE=1 SV=2
tissue lysate	917.344	917.425	-88.586	ESYDYLK		Q9QZ88	VPS29_MOUSE Vacuolar protein sorting-associated protein 29 OS=Mus musculus GN=Vps29 PE=1 SV=1
tissue lysate	930.333	930.414	-87.2193	EMFNYAR		P62334	PRS10_MOUSE 26S proteasome regulatory subunit 10B OS=Mus musculus GN=Psmc6 PE=1 SV=1
tissue lysate	933.463	933.471	-8.49875	CIVVEEGK	[1] Carbamidomethyl C	Q9R0P5	DEST_MOUSE Destrin OS=Mus musculus GN=Dstn PE=1 SV=3
tissue lysate	952.725	952.619	111.343	VPLILVGNK		Q8BU31	RAP2C_MOUSE Ras-related protein Rap-2c OS=Mus musculus GN=Rap2c PE=1 SV=1
tissue lysate on-tissue digestion	968.624	968.553	73.8215	LGPLVEQGR		P08226	APOE_MOUSE Apolipoprotein E OS=Mus musculus OX=10090 GN=Apoe PE=1 SV=2
tissue lysate	972.54	972.522	17.9787	GLDRINER		P63328	PP2BA_MOUSE Serine/threonine-protein phosphatase 2B catalytic subunit alpha isoform OS=Mus musculus GN=Ppp3ca PE=1 SV=1
tissue lysate	985.303	985.456	-154.852	QMAFDFAR		Q61548	AP180_MOUSE Clathrin coat assembly protein AP180 OS=Mus musculus GN=Snap91 PE=1 SV=1
tissue lysate on-tissue digestion	1015.54	1015.55	-17.0441	SAAEVIAQAR		O08553	DPYL2_MOUSE Dihydropyrimidinase-related protein 2 OS=Mus musculus OX=10090 GN=Dpysl2 PE=1 SV=2
on-tissue digestion	1026.5	1026.5	-2.89007	MNTSFTRK	[N-term] Acetyl N-TERM	P16330	CN37_MOUSE 2'_3'-cyclic-nucleotide 3'-phosphodiesterase OS=Mus musculus OX=10090 GN=Cnp PE=1 SV=3
tissue lysate	1144.79	1144.66	112.252	LNSLSIPSVSK		P49070	CAMLG_MOUSE Calcium signal-modulating cyclophilin ligand OS=Mus musculus GN=Camlg PE=1 SV=2
tissue lysate	1159.58	1159.6	-13.2134	REEVLEEGAK		Q9QYR6	MAP1A_MOUSE Microtubule-associated protein 1A OS=Mus musculus GN=Map1a PE=1 SV=2
tissue lysate on-tissue digestion	1192.45	1192.56	-94.3015	ISEEEELDTK		Q62048	PEA15_MOUSE Astrocytic phosphoprotein PEA-15 OS=Mus musculus OX=10090 GN=Pea15 PE=1 SV=1
tissue lysate	1198.93	1198.75	146.844	ELISKILLNR		P22599	A1AT2_MOUSE Alpha-1-antitrypsin 1-2 OS=Mus musculus GN=Serpina1b PE=1 SV=2
tissue lysate	1215.49	1215.59	-87.776	AYICAHPLDR	[4] Carbamidomethyl C	Q8JZN5	ACAD9_MOUSE Acyl-CoA dehydrogenase family member 9_ mitochondrial OS=Mus musculus GN=Acad9 PE=1 SV=2
tissue lysate	1303.67	1303.67	-3.84705	TANASLEEIIDK		Q8BX70	VP13C_MOUSE Vacuolar protein sorting-associated protein 13C OS=Mus musculus GN=Vps13c PE=1 SV=2
tissue lysate	1338.66	1338.64	13.8986	DYIWNTLNSGR		Q9CZU6	CISY_MOUSE Citrate synthase_ mitochondrial OS=Mus musculus GN=Cs PE=1 SV=1
tissue lysate	1397.11	1396.84	193.745	ILFRPVASQLPR		P67778	PHB_MOUSE Prohibitin OS=Mus musculus GN=Phb PE=1 SV=1
tissue lysate	1420.2	1419.78	295.784	SQTDQLVLIFAGK		Q9QZM0	UBQL2_MOUSE Ubiquilin-2 OS=Mus musculus GN=Ubqln2 PE=1 SV=2
tissue lysate	1422.76	1422.77	-6.98167	ATGTPPPQINWLK		D3YXG0	HMCN1_MOUSE Hemicentin-1 OS=Mus musculus GN=Hmcn1 PE=1 SV=1
tissue lysate	1444.76	1444.75	7.33043	NSLLNEDLEKVK	[N-term] Acetyl N-TERM [5] Deamidation N	Q61644	PACN1_MOUSE Protein kinase C and casein kinase substrate in neurons protein 1 OS=Mus musculus GN=Pacsin1 PE=1 SV=1
tissue lysate	1698.58	1698.74	-95.553	MIVECVMNNATCTR	[5] Carbamidomethyl C [12] Carbamidomethyl C	Q05816	FABP5_MOUSE Fatty acid-binding protein_ epidermal OS=Mus musculus GN=Fabp5 PE=1 SV=3
tissue lysate on-tissue digestion	2189.68	2189.91	-104.571	NMGGPYGGGNYGPGGSGGSGGYGGR		O88569	ROA2_MOUSE Heterogeneous nuclear ribonucleoproteins A2/B1 OS=Mus musculus GN=Hnrnpa2b1 PE=1 SV=2
tissue lysate	2191.83	2192.03	-93.5889	AGYTDQVVIGMDVAASEFYR		P17182	ENOA_MOUSE Alpha-enolase OS=Mus musculus GN=Eno1 PE=1 SV=3

## Sheet: R4 region_identified proteins
Detection	MALDI-MSI Observed m/z	LC-MS/MS protonated m/z	Matching error (ppm)	Sequence	Modifications	Accession	Description
tissue lysate on-tissue digestion	708.949	708.477	666.736	IIIPPR		G5E8K5	ANK3_MOUSE Ankyrin-3 OS=Mus musculus GN=Ank3 PE=1 SV=1
tissue lysate	721.62	721.424	271.13	FEGLKK		P19639	GSTM3_MOUSE Glutathione S-transferase Mu 3 OS=Mus musculus GN=Gstm3 PE=1 SV=2
tissue lysate	758.846	758.477	486.897	VGIKVDK		P05064	ALDOA_MOUSE Fructose-bisphosphate aldolase A OS=Mus musculus GN=Aldoa PE=1 SV=2
tissue lysate	842.646	842.546	119.23	VQIINKK		P10637	TAU_MOUSE Microtubule-associated protein tau OS=Mus musculus GN=Mapt PE=1 SV=3
tissue lysate	866.625	866.498	146.028	FVIATSTK		P47911	RL6_MOUSE 60S ribosomal protein L6 OS=Mus musculus GN=Rpl6 PE=1 SV=3
tissue lysate	878.282	878.367	-96.9412	DCEAEVR	[2] Carbamidomethyl C	Q76MZ3	2AAA_MOUSE Serine/threonine-protein phosphatase 2A 65 kDa regulatory subunit A alpha isoform OS=Mus musculus GN=Ppp2r1a PE=1 SV=3
tissue lysate	914.485	914.473	12.6541	GSPFHELK		Q8BX70	VP13C_MOUSE Vacuolar protein sorting-associated protein 13C OS=Mus musculus GN=Vps13c PE=1 SV=2
tissue lysate	917.344	917.425	-88.5864	ESYDYLK		Q9QZ88	VPS29_MOUSE Vacuolar protein sorting-associated protein 29 OS=Mus musculus GN=Vps29 PE=1 SV=1
tissue lysate	930.333	930.414	-87.2193	EMFNYAR		P62334	PRS10_MOUSE 26S proteasome regulatory subunit 10B OS=Mus musculus GN=Psmc6 PE=1 SV=1
tissue lysate	933.463	933.471	-8.49875	CIVVEEGK	[1] Carbamidomethyl C	Q9R0P5	DEST_MOUSE Destrin OS=Mus musculus GN=Dstn PE=1 SV=3
tissue lysate	968.422	968.418	4.26813	MTAMDNASK		Q91VR2	ATPG_MOUSE ATP synthase subunit gamma_ mitochondrial OS=Mus musculus GN=Atp5c1 PE=1 SV=1
tissue lysate on-tissue digestion	968.62	968.553	69.7949	LGPLVEQGR		P08226	APOE_MOUSE Apolipoprotein E OS=Mus musculus OX=10090 GN=Apoe PE=1 SV=2
tissue lysate	972.54	972.522	17.9787	GLDRINER		P63328	PP2BA_MOUSE Serine/threonine-protein phosphatase 2B catalytic subunit alpha isoform OS=Mus musculus GN=Ppp3ca PE=1 SV=1
tissue lysate	985.303	985.456	-154.852	QMAFDFAR		Q61548	AP180_MOUSE Clathrin coat assembly protein AP180 OS=Mus musculus GN=Snap91 PE=1 SV=1
tissue lysate on-tissue digestion	1015.54	1015.55	-17.0441	SAAEVIAQAR		O08553	DPYL2_MOUSE Dihydropyrimidinase-related protein 2 OS=Mus musculus OX=10090 GN=Dpysl2 PE=1 SV=2
on-tissue digestion	1026.5	1026.5	-2.89007	MNTSFTRK	[N-term] Acetyl N-TERM	P16330	CN37_MOUSE 2'_3'-cyclic-nucleotide 3'-phosphodiesterase OS=Mus musculus OX=10090 GN=Cnp PE=1 SV=3
tissue lysate on-tissue digestion	1030.56	1030.54	16.3025	IAENVEEVK		O35526	STX1A_MOUSE Syntaxin-1A OS=Mus musculus OX=10090 GN=Stx1a PE=1 SV=3
tissue lysate	1156.6	1156.62	-9.02687	HPEPFFALAK		Q8VDQ8	SIR2_MOUSE NAD-dependent protein deacetylase sirtuin-2 OS=Mus musculus GN=Sirt2 PE=1 SV=2
tissue lysate	1159.58	1159.6	-13.2134	REEVLEEGAK		Q9QYR6	MAP1A_MOUSE Microtubule-associated protein 1A OS=Mus musculus GN=Map1a PE=1 SV=2
tissue lysate on-tissue digestion	1174.6	1174.6	0.532096	NSLLNEDLEK		Q61644	PACN1_MOUSE Protein kinase C and casein kinase substrate in neurons protein 1 OS=Mus musculus GN=Pacsin1 PE=1 SV=1
on-tissue digestion	1232.64	1232.6	29.4196	EIGQSVDEVEK		Q62261	SPTB2_MOUSE Spectrin beta chain_ non-erythrocytic 1 OS=Mus musculus OX=10090 GN=Sptbn1 PE=1 SV=2
tissue lysate	1303.67	1303.67	-3.84705	TANASLEEIIDK		Q8BX70	VP13C_MOUSE Vacuolar protein sorting-associated protein 13C OS=Mus musculus GN=Vps13c PE=1 SV=2
tissue lysate	1337.98	1337.86	93.6075	AIIIFVPVPQLK		P62082	RS7_MOUSE 40S ribosomal protein S7 OS=Mus musculus GN=Rps7 PE=2 SV=1
tissue lysate	1338.66	1338.64	13.8986	DYIWNTLNSGR		Q9CZU6	CISY_MOUSE Citrate synthase_ mitochondrial OS=Mus musculus GN=Cs PE=1 SV=1
tissue lysate	1397.11	1396.84	195.154	ILFRPVASQLPR		P67778	PHB_MOUSE Prohibitin OS=Mus musculus GN=Phb PE=1 SV=1
tissue lysate	1420.21	1419.78	298.32	SQTDQLVLIFAGK		Q9QZM0	UBQL2_MOUSE Ubiquilin-2 OS=Mus musculus GN=Ubqln2 PE=1 SV=2
tissue lysate	1422.76	1422.77	-6.98167	ATGTPPPQINWLK		D3YXG0	HMCN1_MOUSE Hemicentin-1 OS=Mus musculus GN=Hmcn1 PE=1 SV=1
tissue lysate	1423.79	1423.78	1.84953	LFQVEYAIEAIK		Q9Z2U1	PSA5_MOUSE Proteasome subunit alpha type-5 OS=Mus musculus GN=Psma5 PE=1 SV=1
tissue lysate	1444.76	1444.75	7.33043	NSLLNEDLEKVK	[N-term] Acetyl N-TERM [5] Deamidation N	Q61644	PACN1_MOUSE Protein kinase C and casein kinase substrate in neurons protein 1 OS=Mus musculus GN=Pacsin1 PE=1 SV=1
tissue lysate	1698.58	1698.74	-95.5559	MIVECVMNNATCTR	[5] Carbamidomethyl C [12] Carbamidomethyl C	Q05816	FABP5_MOUSE Fatty acid-binding protein_ epidermal OS=Mus musculus GN=Fabp5 PE=1 SV=3
tissue lysate	2191.83	2192.03	-93.5889	AGYTDQVVIGMDVAASEFYR		P17182	ENOA_MOUSE Alpha-enolase OS=Mus musculus GN=Eno1 PE=1 SV=3
