# Supplementary material for: Spatial proteomic alterations detected via MALDI-MS imaging implicate neuronal loss in a Huntington's disease mouse (YAC128) brain
Source: Royal Society of Chemistry journal article supplement (doi:10.1039/d1mo00440a), 2022-02-07
Supplement: d1mo00440a4.pdf [file d1mo00440a4.pdf]

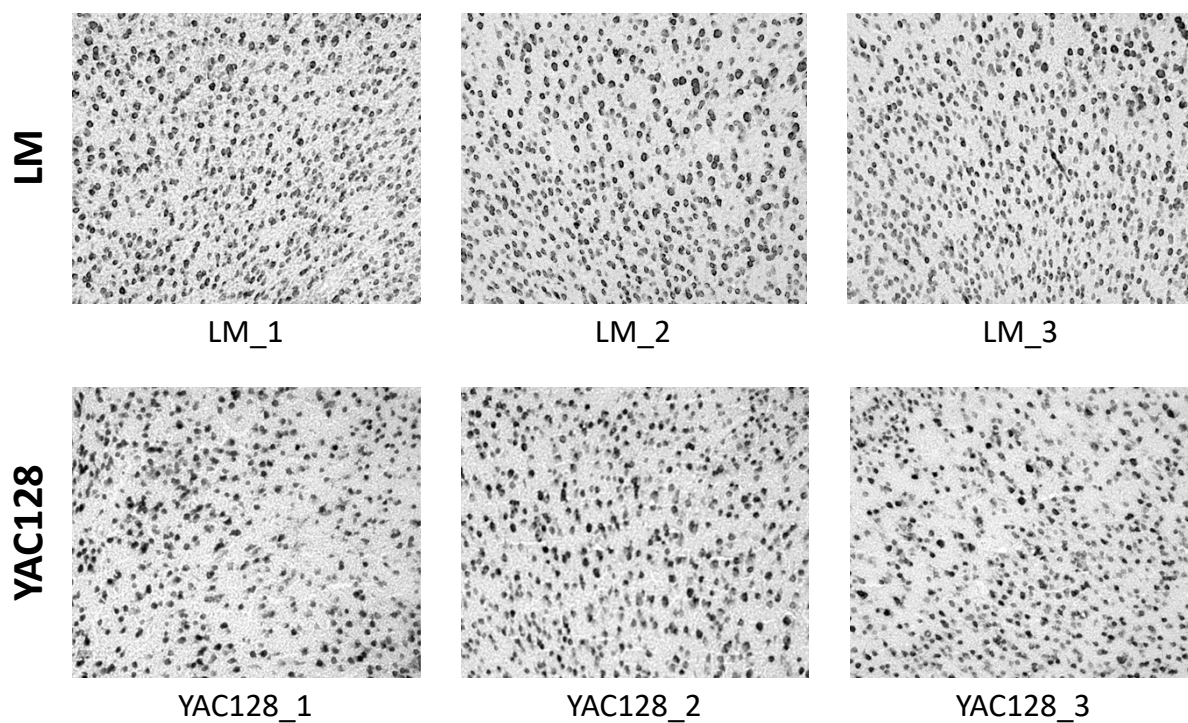

The images of Anti NeuN immunostainings of the cortex region of the brains Huntington model (YAC128) and their healthy littermates (LM). n = 3 for each group. Original magnification: 20X.

**LM**

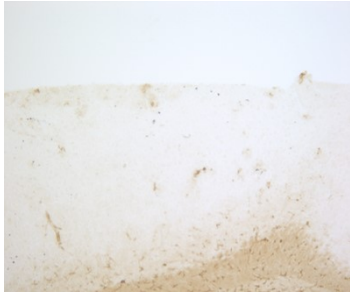

LM\_1

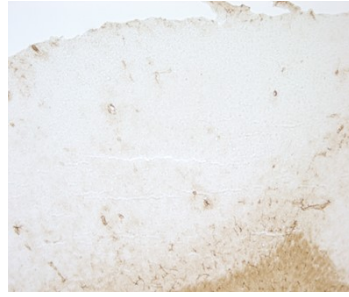

LM\_2

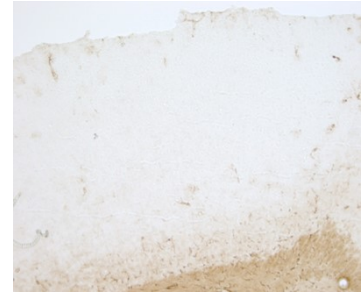

LM\_3

**YAC128**

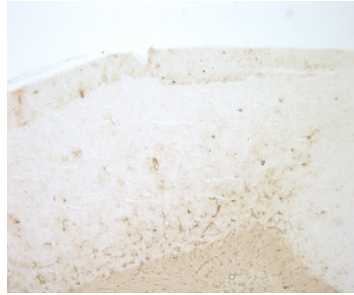

YAC128\_1

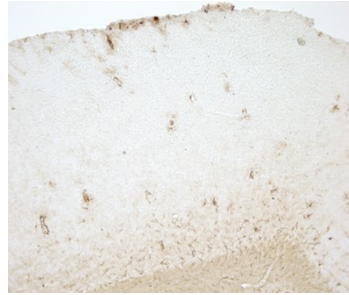

YAC128\_2

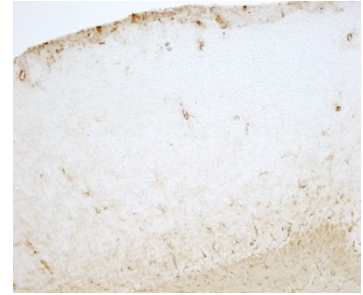

YAC128\_3

The images of Anti-GFAP immunostainings of upper left side of the brain tissues of Huntington model (YAC128) and their healthy littermates (LM). n = 3 for each group. Original magnification: 10X.

**LM**

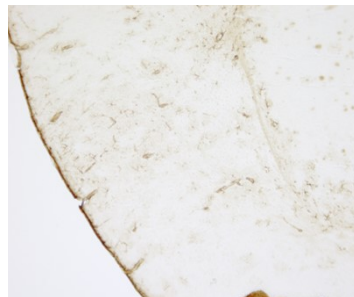

LM\_1

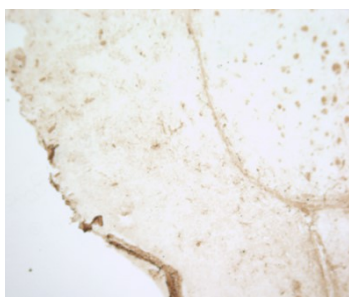

LM\_2

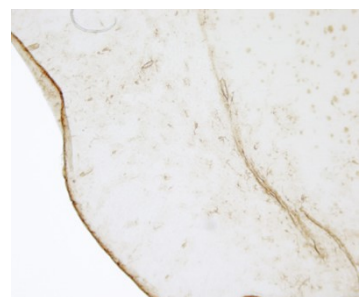

LM\_3

**YAC128**

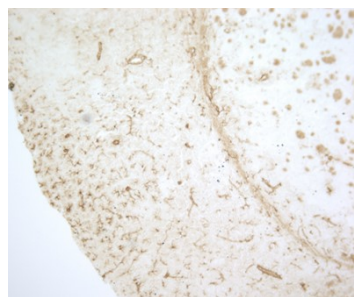

YAC128\_1

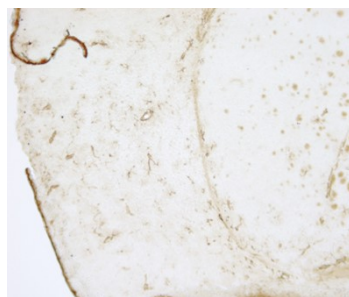

YAC128\_2

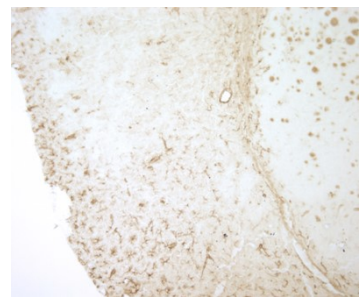

YAC128\_3

The images of Anti-GFAP immunostainings of lower left side of the brain tissues of Huntington model (YAC128) and their healthy littermates (LM). n = 3 for each group. Original magnification: 10X.
