# Supplementary material for: Spatial proteomic alterations detected via MALDI-MS imaging implicate neuronal loss in a Huntington's disease mouse (YAC128) brain
Source: Royal Society of Chemistry journal article supplement (doi:10.1039/d1mo00440a), 2022-02-07
Supplement: d1mo00440a6.xlsx [file d1mo00440a6.xlsx]

## Sheet: Region-3
Supplemental Material4_MALDI-MSI region information_Region3
LM-1		LM-2		LM-3		LM-4		LM-5		LM-6		YAC128-1		YAC128-2		YAC128-3		YAC128-4		YAC128-5		YAC128-6
m/z	intensities	m/z	intensities	m/z	intensities	m/z	intensities	m/z	intensities	m/z	intensities	m/z	intensities	m/z	intensities	m/z	intensities	m/z	intensities	m/z	intensities	m/z	intensities
699,9237061	0	699,9227295	0	699,913147	0	699,913147	0	699,9227295	0	699,9237061	0	699,9237061	0	699,9237061	0	699,9227295	0	699,913147	0	699,913147	0	699,913147	0
699,9486084	0,056006126	699,9476318	0,015314807	699,9380493	0,00862025	699,9380493	0,016212167	699,9476318	0,010263255	699,9486084	0,026568679	699,9486084	0,035920911	699,9486084	0,027417967	699,9476318	0,026818395	699,9380493	0,007685446	699,9380493	0,010471812	699,9380493	0,009044733
699,9735107	0,056200985	699,9725342	0,015365127	699,9629517	0,008648742	699,9629517	0,016271787	699,9725342	0,010288044	699,9735107	0,026646324	699,9735107	0,036030333	699,9735107	0,027486041	699,9725342	0,026919935	699,9629517	0,007705435	699,9629517	0,010509203	699,9629517	0,009072213
699,9984741	0,162196949	699,9974365	0,100351766	699,987854	0,096301585	699,987854	0,131666139	699,9974365	0,09323816	699,9984741	0,064327136	699,9984741	0,096319087	699,9984741	0,07461179	699,9974365	0,155845135	699,987854	0,09442801	699,987854	0,12692745	699,987854	0,101533338
700,0233765	0,353648424	700,0223389	0,17975837	700,0127563	0,091789849	700,0127563	0,163292378	700,0223389	0,136376515	700,0233765	0,080392301	700,0233765	0,110546544	700,0233765	0,08692161	700,0223389	0,3859182	700,0127563	0,076476395	700,0127563	0,123865947	700,0127563	0,078834057
700,0482788	0,980533421	700,0472412	0,311945379	700,0376587	0,16183053	700,0376587	0,390850812	700,0472412	0,171529606	700,0482788	0,146114185	700,0482788	0,266652614	700,0482788	0,150973514	700,0472412	0,804377019	700,0376587	0,115622446	700,0376587	0,256223857	700,0376587	0,140034512
700,0731812	2,047662973	700,0721436	0,459121823	700,062561	0,26692	700,062561	0,74255538	700,0721436	0,194062933	700,0731812	0,213868067	700,0731812	0,514744103	700,0731812	0,21111688	700,0721436	1,283195615	700,062561	0,156817988	700,062561	0,490214407	700,062561	0,234960377
700,0980835	3,125660419	700,0971069	0,70966363	700,0874634	0,431252301	700,0874634	0,98299706	700,0971069	0,343779773	700,0980835	0,440182924	700,0980835	1,019012928	700,0980835	0,399996191	700,0971069	1,657106876	700,0874634	0,208888113	700,0874634	0,635118961	700,0874634	0,345420748
700,1229858	3,356359959	700,1220093	0,836619973	700,1123657	0,661176622	700,1123657	0,9684847	700,1220093	0,504101634	700,1229858	0,924419761	700,1229858	1,747920632	700,1229858	0,787765622	700,1220093	1,589611292	700,1123657	0,380719572	700,1123657	0,655056059	700,1123657	0,555735528
700,1478882	2,579306602	700,1469116	0,696485221	700,1372681	0,703205526	700,1372681	0,73008877	700,1469116	0,534862518	700,1478882	1,41429925	700,1478882	2,109973907	700,1478882	1,106561661	700,1469116	1,148237228	700,1372681	0,511306345	700,1372681	0,543458343	700,1372681	0,62887013
700,1727905	1,644893408	700,171814	0,558137894	700,1622314	0,537326515	700,1622314	0,435126871	700,171814	0,536685705	700,1727905	1,638724089	700,1727905	1,913577914	700,1727905	1,191266656	700,171814	0,802455604	700,1622314	0,476584822	700,1622314	0,344310075	700,1622314	0,489081621
700,1976929	1,051607847	700,1967163	0,454842091	700,1871338	0,405766129	700,1871338	0,300934881	700,1967163	0,480667233	700,1976929	1,494235516	700,1976929	1,491405249	700,1976929	1,066911221	700,1967163	0,581619143	700,1871338	0,405105174	700,1871338	0,244005561	700,1871338	0,373145908
700,2225952	0,651228487	700,2216187	0,289882302	700,2120361	0,303067088	700,2120361	0,245211661	700,2216187	0,341169715	700,2225952	1,106002331	700,2225952	1,033449411	700,2225952	0,797041297	700,2216187	0,353586406	700,2120361	0,325440466	700,2120361	0,222571954	700,2120361	0,299280882
700,2474976	0,394245267	700,246521	0,224435717	700,2369385	0,188951716	700,2369385	0,150235668	700,246521	0,27289173	700,2474976	0,733478248	700,2474976	0,642870545	700,2474976	0,531737864	700,246521	0,271663308	700,2369385	0,209688798	700,2369385	0,148520231	700,2369385	0,181337655
700,2723999	0,328866869	700,2714233	0,241569191	700,2618408	0,164820865	700,2618408	0,151832506	700,2714233	0,259064049	700,2723999	0,528478324	700,2723999	0,459489137	700,2723999	0,398009479	700,2714233	0,292888999	700,2618408	0,1719594	700,2618408	0,132263944	700,2618408	0,152841419
700,2973022	0,289865732	700,2963257	0,195434585	700,2867432	0,179517686	700,2867432	0,212192476	700,2963257	0,188298807	700,2973022	0,362977445	700,2973022	0,352306098	700,2973022	0,295354843	700,2963257	0,25049594	700,2867432	0,174000695	700,2867432	0,195253775	700,2867432	0,178162739
700,3222046	0,221180022	700,321228	0,212285012	700,3116455	0,152111858	700,3116455	0,204684183	700,321228	0,174494058	700,3222046	0,239104614	700,3222046	0,243830904	700,3222046	0,205757916	700,321228	0,294256955	700,3116455	0,137699887	700,3116455	0,186333612	700,3116455	0,148839906
700,3471069	0,273078024	700,3461304	0,352886438	700,3365479	0,187146559	700,3365479	0,253949463	700,3461304	0,245577201	700,3471069	0,233191997	700,3471069	0,252792627	700,3471069	0,213972166	700,3461304	0,458138794	700,3365479	0,148440212	700,3365479	0,216669962	700,3365479	0,16364333
700,3720093	0,316947699	700,3710327	0,454366177	700,3614502	0,273755252	700,3614502	0,369185537	700,3710327	0,279093593	700,3720093	0,21850355	700,3720093	0,273863465	700,3720093	0,230445117	700,3710327	0,578501225	700,3614502	0,220708758	700,3614502	0,329499394	700,3614502	0,254341155
700,3969116	0,311499625	700,3959351	0,611856103	700,3863525	0,309113652	700,3863525	0,408308625	700,3959351	0,360611051	700,3969116	0,195259213	700,3969116	0,247903273	700,3969116	0,23191525	700,3959351	0,7485255	700,3863525	0,24804312	700,3863525	0,375593245	700,3863525	0,285757214
700,421814	0,412139088	700,4208374	0,950577259	700,4112549	0,373163819	700,4112549	0,472493798	700,4208374	0,565294564	700,421814	0,264557242	700,421814	0,340699971	700,421814	0,329125673	700,4208374	1,11601913	700,4112549	0,293590814	700,4112549	0,431322545	700,4112549	0,325388134
700,4467163	0,524906754	700,4457397	1,331876755	700,4361572	0,509044349	700,4361572	0,655939877	700,4457397	0,769957304	700,4467163	0,31611827	700,4467163	0,439133614	700,4467163	0,436166108	700,4457397	1,466864109	700,4361572	0,412166208	700,4361572	0,60300684	700,4361572	0,459348828
700,4716187	0,569527745	700,4706421	1,734463692	700,4610596	0,624793351	700,4610596	0,779266357	700,4706421	1,051940918	700,4716187	0,341758728	700,4716187	0,490629286	700,4716187	0,524718821	700,4706421	1,722272158	700,4610596	0,509528756	700,4610596	0,720330238	700,4610596	0,554193556
700,496521	0,637397468	700,4955444	2,083338737	700,4859619	0,757625401	700,4859619	0,797895789	700,4955444	1,445406318	700,496521	0,466175854	700,496521	0,62300092	700,496521	0,723471761	700,4955444	1,821053743	700,4859619	0,640901744	700,4859619	0,710462689	700,4859619	0,645149827
700,5214233	0,627776921	700,5204468	2,07056427	700,5108643	0,866675675	700,5108643	0,753690422	700,5204468	1,709037662	700,5214233	0,604659736	700,5214233	0,745770335	700,5214233	0,91605556	700,5204468	1,585304737	700,5108643	0,824405015	700,5108643	0,681204975	700,5108643	0,763827205
700,5463257	0,462350905	700,5453491	1,706815243	700,5357666	0,798391223	700,5357666	0,579486489	700,5453491	1,72038877	700,5463257	0,64387852	700,5463257	0,69182229	700,5463257	0,95067966	700,5453491	1,172752857	700,5357666	0,882793963	700,5357666	0,539662182	700,5357666	0,727275968
700,571228	0,346937478	700,5702515	1,340721965	700,5606689	0,623694718	700,5606689	0,371275395	700,5702515	1,597240686	700,571228	0,665502667	700,571228	0,601920903	700,571228	0,907579839	700,5702515	0,872658074	700,5606689	0,77501905	700,5606689	0,34568134	700,5606689	0,568156183
700,5961304	0,302866429	700,5951538	0,976306081	700,5855713	0,484755218	700,5855713	0,293906808	700,5951538	1,308612347	700,5961304	0,60246098	700,5961304	0,526089251	700,5961304	0,786770463	700,5951538	0,610368252	700,5855713	0,641415417	700,5855713	0,268534929	700,5855713	0,461298823
700,6210327	0,224969551	700,6200562	0,691622734	700,6104736	0,38652283	700,6104736	0,245164752	700,6200562	1,031558514	700,6210327	0,479209244	700,6210327	0,406367064	700,6210327	0,623908937	700,6200562	0,406591922	700,6104736	0,526437521	700,6104736	0,237183854	700,6104736	0,383231193
700,6459351	0,156025246	700,6449585	0,518718779	700,635376	0,262795717	700,635376	0,156737491	700,6449585	0,825087786	700,6459351	0,372482717	700,6459351	0,297432959	700,6459351	0,4764238	700,6449585	0,304930151	700,635376	0,377855659	700,635376	0,156582028	700,635376	0,260418952
700,6708374	0,149444699	700,6698608	0,412231952	700,6602783	0,185313702	700,6602783	0,116312087	700,6698608	0,643793881	700,6708374	0,306911767	700,6708374	0,240928724	700,6708374	0,369715929	700,6698608	0,278965116	700,6602783	0,255801499	700,6602783	0,10527014	700,6602783	0,171447471
700,6957397	0,148422718	700,6947632	0,279515147	700,6851807	0,174420536	700,6851807	0,148002878	700,6947632	0,441076308	700,6957397	0,22734648	700,6957397	0,199695125	700,6957397	0,274285138	700,6947632	0,187571362	700,6851807	0,215391859	700,6851807	0,138773426	700,6851807	0,177534252
700,7206421	0,099817663	700,7196655	0,179089934	700,710083	0,124690734	700,710083	0,105718769	700,7196655	0,30487895	700,7206421	0,146089092	700,7206421	0,124387473	700,7206421	0,174983338	700,7196655	0,127673894	700,710083	0,15248017	700,710083	0,107087255	700,710083	0,124494262
700,7456055	0,117255799	700,7445679	0,196779668	700,7349854	0,098231681	700,7349854	0,07774803	700,7445679	0,272711694	700,7456055	0,13995479	700,7456055	0,131133243	700,7456055	0,157773584	700,7445679	0,162624195	700,7349854	0,112156384	700,7349854	0,070872061	700,7349854	0,089308016
700,7705078	0,132450759	700,7694702	0,153650761	700,7599487	0,119858429	700,7599487	0,110440344	700,7694702	0,204575256	700,7705078	0,129616886	700,7705078	0,142382279	700,7705078	0,14652279	700,7694702	0,126137048	700,7599487	0,128349692	700,7599487	0,104156397	700,7599487	0,122280993
700,7954102	0,071504794	700,7944336	0,096775196	700,7848511	0,087682068	700,7848511	0,079454988	700,7944336	0,140423477	700,7954102	0,077130415	700,7954102	0,090418026	700,7954102	0,088081524	700,7944336	0,074128695	700,7848511	0,100679614	700,7848511	0,089091852	700,7848511	0,094775975
700,8203125	0,071698241	700,8193359	0,124500215	700,8097534	0,06216117	700,8097534	0,050586108	700,8193359	0,148911968	700,8203125	0,093516052	700,8203125	0,089800432	700,8203125	0,094909959	700,8193359	0,106455155	700,8097534	0,069572829	700,8097534	0,04896836	700,8097534	0,053943813
700,8452148	0,095599174	700,8442383	0,118954428	700,8346558	0,086723804	700,8346558	0,086518094	700,8442383	0,128815681	700,8452148	0,096586995	700,8452148	0,110437311	700,8452148	0,104806334	700,8442383	0,10047929	700,8346558	0,089424036	700,8346558	0,083969176	700,8346558	0,085596465
700,8701172	0,05702908	700,8691406	0,073493496	700,8595581	0,074319586	700,8595581	0,080145225	700,8691406	0,08619979	700,8701172	0,056187335	700,8701172	0,065663606	700,8701172	0,063674815	700,8691406	0,058742307	700,8595581	0,080439039	700,8595581	0,088942192	700,8595581	0,080885902
700,8950195	0,064018689	700,894043	0,106701478	700,8844604	0,053447008	700,8844604	0,047693316	700,894043	0,113494448	700,8950195	0,065168642	700,8950195	0,060698859	700,8950195	0,067394249	700,894043	0,097837657	700,8844604	0,054133989	700,8844604	0,051677354	700,8844604	0,048800904
700,9199219	0,099533275	700,9189453	0,114416644	700,9093628	0,08070524	700,9093628	0,080370031	700,9189453	0,109526753	700,9199219	0,083572805	700,9199219	0,098974913	700,9199219	0,092183001	700,9189453	0,104214922	700,9093628	0,076875992	700,9093628	0,079469897	700,9093628	0,080522113
700,9448242	0,076515593	700,9438477	0,07117936	700,9342651	0,075826854	700,9342651	0,087676838	700,9438477	0,072964467	700,9448242	0,055278979	700,9448242	0,06668894	700,9448242	0,064260915	700,9438477	0,06949389	700,9342651	0,078659058	700,9342651	0,094761603	700,9342651	0,086011112
700,9697266	0,08939366	700,96875	0,106348626	700,9591675	0,053618416	700,9591675	0,064074002	700,96875	0,101094328	700,9697266	0,061147645	700,9697266	0,061386772	700,9697266	0,063714162	700,96875	0,124907799	700,9591675	0,053511273	700,9591675	0,061766826	700,9591675	0,049084563
700,9946289	0,205525845	700,9936523	0,140865937	700,9840698	0,085422337	700,9840698	0,133007333	700,9936523	0,110737436	700,9946289	0,091753356	700,9946289	0,120533057	700,9946289	0,09643703	700,9936523	0,211514041	700,9840698	0,077160724	700,9840698	0,106754683	700,9840698	0,083733693
701,0195313	0,367040098	701,0185547	0,133057177	701,0089722	0,109292008	701,0089722	0,225997642	701,0185547	0,083999231	701,0195313	0,076601848	701,0195313	0,13374576	701,0195313	0,088944867	701,0185547	0,301341355	701,0089722	0,089696094	701,0089722	0,179795802	701,0089722	0,114817806
701,0444336	0,766650736	701,043457	0,241358191	701,0338745	0,131306812	701,0338745	0,339293718	701,043457	0,133646607	701,0444336	0,103757069	701,0444336	0,203331202	701,0444336	0,107409909	701,043457	0,60122484	701,0338745	0,079513803	701,0338745	0,222340181	701,0338745	0,110287562
701,0693359	1,524084091	701,0683594	0,401217639	701,0587769	0,251428723	701,0587769	0,604498148	701,0683594	0,201046139	701,0693359	0,2303541	701,0693359	0,465029538	701,0693359	0,220371023	701,0683594	0,941137433	701,0587769	0,14094153	701,0587769	0,383194029	701,0587769	0,212594464
701,0942383	2,098320246	701,0932617	0,458163232	701,0836792	0,39654687	701,0836792	0,779269695	701,0932617	0,229394838	701,0942383	0,382758677	701,0942383	0,811480641	701,0942383	0,35610494	701,0932617	1,024939179	701,0836792	0,229202211	701,0836792	0,526575804	701,0836792	0,347762436
701,1191406	2,071933985	701,1181641	0,512862086	701,1085815	0,478974849	701,1085815	0,676729262	701,1181641	0,333785027	701,1191406	0,657659769	701,1191406	1,176425457	701,1191406	0,547711551	701,1181641	0,958327651	701,1085815	0,290728301	701,1085815	0,465078771	701,1085815	0,407126993
701,144043	1,691094398	701,1430664	0,504989564	701,1334839	0,519152999	701,1334839	0,541137874	701,1430664	0,398472041	701,144043	0,979488075	701,144043	1,402236938	701,144043	0,773598135	701,1430664	0,786458373	701,1334839	0,387980163	701,1334839	0,391643018	701,1334839	0,451491624
701,1689453	1,221134424	701,1679688	0,35433355	701,1583862	0,457435638	701,1583862	0,42393294	701,1679688	0,333479941	701,1689453	1,0893116	701,1689453	1,295864582	701,1689453	0,819402635	701,1679688	0,513426125	701,1583862	0,415202409	701,1583862	0,340044528	701,1583862	0,43105799
701,1938477	0,785458207	701,1928711	0,264392436	701,1832886	0,318358272	701,1832886	0,254094511	701,1928711	0,293343842	701,1938477	0,965163946	701,1938477	0,999751985	701,1938477	0,695839226	701,1928711	0,36218679	701,1832886	0,334712982	701,1832886	0,217523396	701,1832886	0,296385944
701,21875	0,561501145	701,2177734	0,256118536	701,2081909	0,246615842	701,2081909	0,195096955	701,2177734	0,276380897	701,21875	0,803836048	701,21875	0,771760523	701,21875	0,589588225	701,2177734	0,325051099	701,2081909	0,280308545	701,2081909	0,162890762	701,2081909	0,231503412
701,2436523	0,414141148	701,2426758	0,17105794	701,2330933	0,214896187	701,2330933	0,207126677	701,2426758	0,186426476	701,2436523	0,593398273	701,2436523	0,555601835	701,2436523	0,445949197	701,2426758	0,218865186	701,2330933	0,250724822	701,2330933	0,187752053	701,2330933	0,216549218
701,2685547	0,27900821	701,2675781	0,137848333	701,2579956	0,145299569	701,2579956	0,157030538	701,2675781	0,146238729	701,2685547	0,396790147	701,2685547	0,368996233	701,2685547	0,295670509	701,2675781	0,198397249	701,2579956	0,164574876	701,2579956	0,144351006	701,2579956	0,144036785
701,293457	0,256597817	701,2924805	0,199493095	701,2828979	0,141743213	701,2828979	0,16223067	701,2924805	0,18327871	701,293457	0,323607266	701,293457	0,310371846	701,293457	0,256119102	701,2924805	0,269614011	701,2828979	0,138108313	701,2828979	0,134849101	701,2828979	0,125534147
701,3183594	0,292096555	701,3173828	0,219780594	701,3078003	0,185508803	701,3078003	0,234167114	701,3173828	0,169971853	701,3183594	0,292593002	701,3183594	0,309288502	701,3183594	0,247412458	701,3173828	0,297101915	701,3078003	0,166646197	701,3078003	0,1975618	701,3078003	0,173599452
701,3432617	0,263174564	701,3422852	0,225355804	701,3327026	0,185302854	701,3327026	0,254838258	701,3422852	0,148858503	701,3432617	0,215385258	701,3432617	0,256730348	701,3432617	0,199168846	701,3422852	0,318817317	701,3327026	0,161302462	701,3327026	0,224397853	701,3327026	0,183622494
701,3681641	0,252756625	701,3671875	0,356521279	701,357666	0,187205344	701,357666	0,256345987	701,3671875	0,225051492	701,3681641	0,184901714	701,3681641	0,223326728	701,3681641	0,190751851	701,3671875	0,505863965	701,357666	0,148632169	701,357666	0,217670679	701,357666	0,162572771
701,3930664	0,35713625	701,3920898	0,58216536	701,3825684	0,267788172	701,3825684	0,375010043	701,3920898	0,329808354	701,3930664	0,229912907	701,3930664	0,292475909	701,3930664	0,252477884	701,3920898	0,854833245	701,3825684	0,207995951	701,3825684	0,319616377	701,3825684	0,231084168
701,4179688	0,519017875	701,4169922	0,907676637	701,4074707	0,362089366	701,4074707	0,607655287	701,4169922	0,438743562	701,4179688	0,230538473	701,4179688	0,334155291	701,4179688	0,292302877	701,4169922	1,489757419	701,4074707	0,273666888	701,4074707	0,547686279	701,4074707	0,326971978
701,4428711	0,930418015	701,4418945	1,662604332	701,432373	0,534159601	701,432373	1,050262451	701,4418945	0,762331545	701,4428711	0,273585618	701,4428711	0,446614355	701,4428711	0,39847374	701,4418945	2,741866589	701,432373	0,340057909	701,432373	0,957155406	701,432373	0,421773374
701,4677734	1,76799643	701,4667969	2,789851189	701,4572754	1,033465624	701,4572754	1,815874934	701,4667969	1,347827792	701,4677734	0,45450142	701,4677734	0,879651248	701,4677734	0,720227242	701,4667969	4,185932159	701,4572754	0,598287463	701,4572754	1,666522861	701,4572754	0,775430977
701,4927368	2,427484035	701,4917603	3,677511215	701,4821777	1,777571797	701,4821777	2,294606924	701,4917603	2,110689402	701,4927368	0,759857833	701,4927368	1,577247739	701,4927368	1,302796006	701,4917603	4,735557079	701,4821777	1,112163544	701,4821777	2,161149979	701,4821777	1,348905921
701,5176392	2,314470768	701,5166626	3,919767141	701,5070801	2,298541307	701,5070801	1,990297437	701,5166626	2,893359184	701,5176392	1,260681033	701,5176392	2,302685499	701,5176392	2,113348484	701,5166626	4,227533817	701,5070801	1,734482646	701,5070801	1,93611443	701,5070801	1,770732999
701,5425415	1,770759106	701,5415649	3,464271069	701,5319824	2,251512289	701,5319824	1,408833861	701,5415649	3,276222944	701,5425415	1,845060468	701,5425415	2,668395758	701,5425415	2,832636356	701,5415649	3,204890013	701,5319824	2,154271841	701,5319824	1,397503853	701,5319824	1,809308529
701,5674438	1,174937129	701,5664673	2,567528725	701,5568848	1,747799754	701,5568848	0,931912482	701,5664673	3,002825022	701,5674438	2,031571627	701,5674438	2,37422967	701,5674438	2,911929131	701,5664673	2,130441904	701,5568848	2,038175583	701,5568848	0,950574219	701,5568848	1,493496418
701,5923462	0,714616597	701,5913696	1,755656719	701,5817871	1,139249802	701,5817871	0,530167043	701,5913696	2,433269024	701,5923462	1,744849205	701,5923462	1,705857038	701,5923462	2,398122549	701,5913696	1,360542297	701,5817871	1,515075326	701,5817871	0,559773982	701,5817871	1,003313899
701,6172485	0,484244913	701,616272	1,227695704	701,6066895	0,716552734	701,6066895	0,323957533	701,616272	1,862222433	701,6172485	1,332707047	701,6172485	1,191024423	701,6172485	1,777427435	701,616272	0,932422876	701,6066895	1,020108819	701,6066895	0,338413835	701,6066895	0,636585474
701,6421509	0,339456499	701,6411743	0,794243276	701,6315918	0,48336333	701,6315918	0,267163634	701,6411743	1,305880308	701,6421509	0,919852912	701,6421509	0,810993016	701,6421509	1,228910089	701,6411743	0,595932186	701,6315918	0,685442209	701,6315918	0,273928493	701,6315918	0,45261997
701,6670532	0,196427405	701,6660767	0,506938934	701,6564941	0,301880449	701,6564941	0,178186715	701,6660767	0,890724838	701,6670532	0,587997615	701,6670532	0,498906642	701,6670532	0,793429613	701,6660767	0,382290602	701,6564941	0,426618069	701,6564941	0,186422259	701,6564941	0,281252235
701,6919556	0,169918999	701,690979	0,40698269	701,6813965	0,207477823	701,6813965	0,122355022	701,690979	0,663641393	701,6919556	0,427084208	701,6919556	0,356054962	701,6919556	0,553874314	701,690979	0,334454715	701,6813965	0,272221744	701,6813965	0,113806978	701,6813965	0,177692249
701,7168579	0,161160544	701,7158813	0,29261294	701,7062988	0,193389297	701,7062988	0,151902735	701,7158813	0,458703399	701,7168579	0,306218386	701,7168579	0,278933853	701,7168579	0,40066573	701,7158813	0,244680211	701,7062988	0,228642449	701,7062988	0,139745012	701,7062988	0,179567799
701,7417603	0,097460665	701,7407837	0,183611855	701,7312012	0,137794808	701,7312012	0,110213593	701,7407837	0,308397502	701,7417603	0,179808855	701,7417603	0,167089134	701,7417603	0,248149976	701,7407837	0,150961652	701,7312012	0,165497348	701,7312012	0,114832066	701,7312012	0,133773729
701,7666626	0,100731246	701,765686	0,190515682	701,7561035	0,096480504	701,7561035	0,066548586	701,765686	0,273768663	701,7666626	0,155579045	701,7666626	0,144372493	701,7666626	0,200670421	701,765686	0,173552632	701,7561035	0,111484043	701,7561035	0,063728012	701,7561035	0,079870038
701,7915649	0,110334173	701,7905884	0,163473636	701,7810059	0,10981369	701,7810059	0,095414087	701,7905884	0,216355637	701,7915649	0,140734255	701,7915649	0,146822661	701,7915649	0,180309713	701,7905884	0,144999802	701,7810059	0,119834401	701,7810059	0,08996775	701,7810059	0,102049939
701,8164673	0,062204801	701,8154907	0,098311976	701,8059082	0,089117087	701,8059082	0,079041719	701,8154907	0,143398419	701,8164673	0,084352657	701,8164673	0,084602863	701,8164673	0,110852629	701,8154907	0,082679972	701,8059082	0,099600494	701,8059082	0,087113328	701,8059082	0,089474201
701,8413696	0,057245478	701,8403931	0,12569496	701,8308105	0,059903026	701,8308105	0,044356287	701,8403931	0,152019948	701,8413696	0,080302827	701,8413696	0,076059163	701,8413696	0,100627154	701,8403931	0,118713975	701,8308105	0,063849725	701,8308105	0,046392016	701,8308105	0,049604349
701,866272	0,094502836	701,8652954	0,134558871	701,8557129	0,082757592	701,8557129	0,084247962	701,8652954	0,13676697	701,866272	0,094947517	701,866272	0,102441415	701,866272	0,114242449	701,8652954	0,125161931	701,8557129	0,082260817	701,8557129	0,077608265	701,8557129	0,075632058
701,8911743	0,064920306	701,8901978	0,082732432	701,8806152	0,077200145	701,8806152	0,083678715	701,8901978	0,092409648	701,8911743	0,056771971	701,8911743	0,068802685	701,8911743	0,07540191	701,8901978	0,079370767	701,8806152	0,079947263	701,8806152	0,089607	701,8806152	0,081446834
701,9160767	0,061092034	701,9151001	0,116098084	701,9055176	0,053013898	701,9055176	0,050056949	701,9151001	0,117001913	701,9160767	0,057748064	701,9160767	0,061770644	701,9160767	0,070005253	701,9151001	0,116381884	701,9055176	0,052567191	701,9055176	0,04939089	701,9055176	0,047309373
701,940979	0,115100786	701,9400024	0,135736957	701,9304199	0,078442685	701,9304199	0,085787177	701,9400024	0,123293929	701,940979	0,089081295	701,940979	0,100077681	701,940979	0,102512404	701,9400024	0,148209289	701,9304199	0,074339069	701,9304199	0,077340528	701,9304199	0,073016018
701,9658813	0,132709265	701,9649048	0,107442342	701,9553833	0,088977769	701,9553833	0,118875161	701,9649048	0,096069187	701,9658813	0,073249049	701,9658813	0,103974164	701,9658813	0,096123546	701,9649048	0,133656263	701,9553833	0,087517709	701,9553833	0,116227455	701,9553833	0,094787352
701,9907837	0,14598383	701,9898071	0,105892994	701,9802856	0,073646583	701,9802856	0,112140469	701,9898071	0,086802676	701,9907837	0,054656915	701,9907837	0,077591248	701,9907837	0,071390048	701,9898071	0,165028229	701,9802856	0,06549529	701,9802856	0,103357494	701,9802856	0,071583249
702,015686	0,332570374	702,0147095	0,197535053	702,005188	0,077908292	702,005188	0,168962702	702,0147095	0,134741202	702,015686	0,097368881	702,015686	0,135468975	702,015686	0,111276008	702,0147095	0,348904282	702,005188	0,061473098	702,005188	0,114216097	702,005188	0,065382741
702,0405884	0,707880497	702,0396118	0,255683303	702,0300903	0,15661867	702,0300903	0,397014499	702,0396118	0,142160043	702,0405884	0,134186864	702,0405884	0,24597308	702,0405884	0,150987834	702,0396118	0,537362337	702,0300903	0,107636541	702,0300903	0,269924492	702,0300903	0,145940319
702,0654907	1,181460023	702,0645142	0,31719166	702,0549927	0,235389397	702,0549927	0,618894696	702,0645142	0,156997383	702,0654907	0,168003619	702,0654907	0,388195693	702,0654907	0,181912914	702,0645142	0,72119379	702,0549927	0,133332521	702,0549927	0,404530495	702,0549927	0,208260819
702,0903931	1,600490689	702,0894165	0,459363073	702,079895	0,367008895	702,079895	0,708571374	702,0894165	0,264462799	702,0903931	0,341442853	702,0903931	0,698973417	702,0903931	0,328776091	702,0894165	0,882854342	702,079895	0,188263819	702,079895	0,439550221	702,079895	0,291284651
702,1152954	1,603524327	702,1143188	0,484027892	702,1047974	0,517199755	702,1047974	0,688706577	702,1143188	0,321083337	702,1152954	0,576387167	702,1152954	1,026888371	702,1152954	0,511963129	702,1143188	0,804710805	702,1047974	0,323744744	702,1047974	0,462786287	702,1047974	0,431804359
702,1401978	1,204281688	702,1392212	0,382136136	702,1296997	0,504289985	702,1296997	0,522707522	702,1392212	0,31166178	702,1401978	0,730713367	702,1401978	1,080486417	702,1401978	0,6053316	702,1392212	0,576712549	702,1296997	0,385367841	702,1296997	0,39229691	702,1296997	0,440824121
702,1651001	0,845404506	702,1641846	0,347206503	702,1546021	0,401508719	702,1546021	0,335133404	702,1641846	0,331044525	702,1651001	0,809623897	702,1651001	0,967278183	702,1651001	0,636355519	702,1641846	0,461567879	702,1546021	0,345438421	702,1546021	0,256455928	702,1546021	0,344724327
702,1900024	0,631541789	702,1890869	0,283887565	702,1795044	0,33693257	702,1795044	0,270209461	702,1890869	0,286427736	702,1900024	0,753566027	702,1900024	0,809455574	702,1900024	0,590638936	702,1890869	0,347771585	702,1795044	0,322995692	702,1795044	0,219226554	702,1795044	0,3029477
702,2149658	0,412190437	702,2139893	0,171646044	702,2044067	0,242876247	702,2044067	0,200573593	702,2139893	0,196163729	702,2149658	0,555163622	702,2149658	0,567334652	702,2149658	0,433931351	702,2139893	0,20807828	702,2044067	0,261953264	702,2044067	0,18216078	702,2044067	0,235157728
702,2398682	0,281918198	702,2388916	0,168634921	702,2293091	0,156560615	702,2293091	0,122004323	702,2388916	0,18827939	702,2398682	0,410084516	702,2398682	0,396211803	702,2398682	0,324747831	702,2388916	0,207895011	702,2293091	0,171487823	702,2293091	0,107056841	702,2293091	0,140899763
702,2647705	0,272342294	702,2637939	0,175015122	702,2542114	0,150706634	702,2542114	0,154871255	702,2637939	0,167630687	702,2647705	0,337441891	702,2647705	0,341513067	702,2647705	0,280026168	702,2637939	0,211525664	702,2542114	0,156636044	702,2542114	0,130808219	702,2542114	0,142375007
702,2896729	0,213469297	702,2886963	0,124388441	702,2791138	0,140316203	702,2791138	0,174894348	702,2886963	0,114972174	702,2896729	0,22554791	702,2896729	0,243573666	702,2896729	0,197107464	702,2886963	0,168823659	702,2791138	0,139433756	702,2791138	0,162523583	702,2791138	0,144407198
702,3145752	0,185690895	702,3135986	0,184845924	702,3040161	0,115515962	702,3040161	0,150966167	702,3135986	0,144227237	702,3145752	0,170964688	702,3145752	0,178911388	702,3145752	0,154146045	702,3135986	0,254837483	702,3040161	0,103752881	702,3040161	0,134234086	702,3040161	0,104717873
702,3394775	0,253602892	702,338501	0,295258373	702,3289185	0,169262514	702,3289185	0,231494501	702,338501	0,183983088	702,3394775	0,187092006	702,3394775	0,218190446	702,3394775	0,188693017	702,338501	0,409304112	702,3289185	0,136036724	702,3289185	0,192793369	702,3289185	0,151117742
702,3643799	0,275001466	702,3634033	0,41242668	702,3538208	0,219373077	702,3538208	0,33814308	702,3634033	0,199266762	702,3643799	0,161041766	702,3643799	0,218305975	702,3643799	0,180660591	702,3634033	0,589891732	702,3538208	0,173497349	702,3538208	0,298999429	702,3538208	0,209764183
702,3892822	0,326050907	702,3883057	0,754139662	702,3787231	0,263295501	702,3787231	0,440846503	702,3883057	0,366395772	702,3892822	0,161584079	702,3892822	0,221562296	702,3892822	0,202299103	702,3883057	1,028180122	702,3787231	0,186348438	702,3787231	0,385276914	702,3787231	0,223524004
702,4141846	0,542542279	702,413208	1,289479852	702,4036255	0,439643025	702,4036255	0,717149019	702,413208	0,643971205	702,4141846	0,240871578	702,4141846	0,356339753	702,4141846	0,332481265	702,413208	1,680358052	702,4036255	0,298419029	702,4036255	0,618945062	702,4036255	0,361621737
702,4390869	0,824017525	702,4381104	1,860266447	702,4285278	0,699537337	702,4285278	1,094624162	702,4381104	0,97295475	702,4390869	0,316259712	702,4390869	0,5158149	702,4390869	0,500738502	702,4381104	2,32948041	702,4285278	0,478554606	702,4285278	0,968099356	702,4285278	0,591940403
702,4639893	1,11482358	702,4630127	2,464117765	702,4534302	0,997392178	702,4534302	1,37377727	702,4630127	1,480858922	702,4639893	0,445338219	702,4639893	0,732931972	702,4639893	0,745012343	702,4630127	2,906838417	702,4534302	0,69289124	702,4534302	1,227889776	702,4534302	0,814872921
702,4888916	1,350447655	702,487915	2,862529755	702,4783325	1,378821969	702,4783325	1,471313953	702,487915	2,023859739	702,4888916	0,706576943	702,4888916	1,112814307	702,4888916	1,145478964	702,487915	3,039991617	702,4783325	1,035759449	702,4783325	1,339894414	702,4783325	1,118870139
702,5137939	1,246867895	702,5128174	2,694246531	702,5032349	1,572514534	702,5032349	1,281095862	702,5128174	2,312783003	702,5137939	0,96421802	702,5137939	1,409075022	702,5137939	1,533162236	702,5128174	2,531956196	702,5032349	1,36999321	702,5032349	1,208470583	702,5032349	1,32339263
702,5386963	0,905401528	702,5377197	2,190027714	702,5281372	1,379688144	702,5281372	0,860012114	702,5377197	2,310193777	702,5386963	1,130300164	702,5386963	1,406458735	702,5386963	1,71029377	702,5377197	1,841585159	702,5281372	1,429026365	702,5281372	0,841645718	702,5281372	1,189640522
702,5635986	0,639741004	702,5626221	1,666865587	702,5531006	1,033236384	702,5531006	0,541052639	702,5626221	2,073415279	702,5635986	1,176951051	702,5635986	1,237448931	702,5635986	1,672861695	702,5626221	1,300072789	702,5531006	1,25045073	702,5531006	0,526887596	702,5531006	0,912548959
702,588501	0,438881814	702,5875244	1,127692103	702,5780029	0,725700557	702,5780029	0,387259752	702,5875244	1,614785075	702,588501	0,995624423	702,588501	0,94835645	702,588501	1,371476054	702,5875244	0,826092362	702,5780029	0,967991829	702,5780029	0,378427863	702,5780029	0,672907174
702,6134033	0,292268068	702,6124268	0,789631128	702,6029053	0,507581055	702,6029053	0,267291337	702,6124268	1,254411459	702,6134033	0,780613005	702,6134033	0,684993565	702,6134033	1,060147285	702,6124268	0,558374882	702,6029053	0,717558742	702,6029053	0,27235058	702,6029053	0,481944948
702,6383057	0,20698145	702,6373291	0,629418433	702,6278076	0,339699686	702,6278076	0,17296946	702,6373291	1,012530208	702,6383057	0,601219594	702,6383057	0,500364184	702,6383057	0,805010736	702,6373291	0,454893768	702,6278076	0,501266956	702,6278076	0,171962559	702,6278076	0,313436151
702,663208	0,198440835	702,6622314	0,469874084	702,65271	0,252366364	702,65271	0,159239963	702,6622314	0,740021527	702,663208	0,451830357	702,663208	0,383437246	702,663208	0,587474525	702,6622314	0,35677442	702,65271	0,351095438	702,65271	0,143246636	702,65271	0,237688944
702,6881104	0,148750961	702,6871338	0,287065297	702,6776123	0,194681004	702,6776123	0,158815995	702,6871338	0,479134709	702,6881104	0,293099672	702,6881104	0,26698631	702,6881104	0,392591447	702,6871338	0,20966737	702,6776123	0,251820713	702,6776123	0,152686447	702,6776123	0,196985349
702,7130127	0,098638669	702,7120361	0,227938592	702,7025146	0,123574749	702,7025146	0,094375648	702,7120361	0,364929348	702,7130127	0,194532692	702,7130127	0,158863872	702,7130127	0,258276641	702,7120361	0,181581855	702,7025146	0,152357921	702,7025146	0,08772251	702,7025146	0,113214023
702,737915	0,117659062	702,7369385	0,224873453	702,727417	0,126312271	702,727417	0,101381548	702,7369385	0,305134505	702,737915	0,173810855	702,737915	0,158220425	702,737915	0,22213915	702,7369385	0,192127764	702,727417	0,13753511	702,727417	0,083734415	702,727417	0,111178264
702,7628174	0,104491875	702,7618408	0,140448496	702,7523193	0,125453576	702,7523193	0,11203593	702,7618408	0,194987431	702,7628174	0,131249815	702,7628174	0,137320399	702,7628174	0,171671942	702,7618408	0,113358207	702,7523193	0,135637179	702,7523193	0,112687469	702,7523193	0,125806272
702,7877197	0,054343671	702,7867432	0,121607721	702,7772217	0,073349103	702,7772217	0,05990684	702,7867432	0,166070148	702,7877197	0,086666569	702,7877197	0,0828408	702,7877197	0,11299108	702,7867432	0,101031996	702,7772217	0,085216932	702,7772217	0,065944649	702,7772217	0,068331219
702,8126221	0,076276787	702,8116455	0,157904044	702,802124	0,076217249	702,802124	0,062517218	702,8116455	0,176637679	702,8126221	0,102830999	702,8126221	0,102273613	702,8126221	0,123294711	702,8116455	0,142809853	702,802124	0,07971938	702,802124	0,056116715	702,802124	0,065509632
702,8375244	0,085337758	702,8365479	0,107910775	702,8270264	0,094013251	702,8270264	0,096777998	702,8365479	0,114886545	702,8375244	0,082602903	702,8375244	0,098686747	702,8375244	0,103801459	702,8365479	0,089364015	702,8270264	0,095355421	702,8270264	0,095799543	702,8270264	0,095606141
702,8624268	0,05159739	702,8615112	0,092200048	702,8519287	0,057008419	702,8519287	0,056504324	702,8615112	0,099190548	702,8624268	0,053880405	702,8624268	0,058620159	702,8624268	0,068745308	702,8615112	0,078891866	702,8519287	0,063272953	702,8519287	0,065610327	702,8519287	0,056798868
702,8873291	0,08150541	702,8864136	0,144866422	702,8768311	0,056476489	702,8768311	0,056535516	702,8864136	0,134386376	702,8873291	0,079314165	702,8873291	0,079478092	702,8873291	0,08736971	702,8864136	0,137441576	702,8768311	0,05645626	702,8768311	0,053790666	702,8768311	0,050884318
702,9122314	0,103616081	702,9113159	0,120441049	702,9017334	0,088773474	702,9017334	0,104363933	702,9113159	0,107843228	702,9122314	0,074420244	702,9122314	0,096479736	702,9122314	0,092874996	702,9113159	0,114491217	702,9017334	0,08615353	702,9017334	0,102760732	702,9017334	0,091285184
702,9371338	0,086981781	702,9362183	0,092001885	702,9266357	0,069405884	702,9266357	0,083219804	702,9362183	0,089907266	702,9371338	0,051964708	702,9371338	0,072751455	702,9371338	0,067983456	702,9362183	0,100437582	702,9266357	0,069126353	702,9266357	0,088728659	702,9266357	0,072463177
702,9620972	0,150946245	702,9611206	0,153157607	702,9515381	0,063899361	702,9515381	0,082331896	702,9611206	0,128520429	702,9620972	0,082927145	702,9620972	0,106643148	702,9620972	0,099988028	702,9611206	0,199729055	702,9515381	0,05844963	702,9515381	0,071414568	702,9515381	0,056008946
702,9869995	0,296878546	702,9860229	0,1730005	702,9764404	0,10574387	702,9764404	0,193488553	702,9860229	0,11830651	702,9869995	0,101824962	702,9869995	0,158123493	702,9869995	0,123320416	702,9860229	0,298614025	702,9764404	0,091566116	702,9764404	0,153616935	702,9764404	0,108277582
703,0119019	0,583070993	703,0109253	0,211848542	703,0013428	0,119643331	703,0013428	0,311453789	703,0109253	0,107871994	703,0119019	0,090110801	703,0119019	0,185591713	703,0119019	0,108453795	703,0109253	0,497733295	703,0013428	0,088586293	703,0013428	0,238457337	703,0013428	0,119959198
703,0368042	1,212207556	703,0358276	0,412039369	703,0262451	0,184659287	703,0262451	0,529244959	703,0358276	0,199498758	703,0368042	0,188157663	703,0368042	0,403202415	703,0368042	0,19761014	703,0358276	0,884037256	703,0262451	0,101134896	703,0262451	0,365396231	703,0262451	0,158070654
703,0617065	1,982771039	703,06073	0,581395149	703,0511475	0,366033524	703,0511475	0,851809621	703,06073	0,287406266	703,0617065	0,374487013	703,0617065	0,828634322	703,0617065	0,389451891	703,06073	1,132490635	703,0511475	0,203714088	703,0511475	0,59764272	703,0511475	0,329801977
703,0866089	2,312566519	703,0856323	0,62301302	703,0760498	0,52997005	703,0760498	0,943726301	703,0856323	0,354198188	703,0866089	0,625450194	703,0866089	1,278674603	703,0866089	0,615930796	703,0856323	1,109819889	703,0760498	0,318988651	703,0760498	0,685207188	703,0760498	0,491564095
703,1115112	2,098960876	703,1105347	0,647819161	703,1009521	0,600335658	703,1009521	0,78221935	703,1105347	0,467235714	703,1115112	0,992547274	703,1115112	1,649216652	703,1115112	0,910572112	703,1105347	0,991086841	703,1009521	0,410991043	703,1009521	0,569279373	703,1009521	0,54724443
703,1364136	1,636658549	703,135437	0,556995988	703,1258545	0,601958692	703,1258545	0,62956208	703,135437	0,472492635	703,1364136	1,252797842	703,1364136	1,728613734	703,1364136	1,08812809	703,135437	0,766466141	703,1258545	0,496905029	703,1258545	0,476447821	703,1258545	0,568776488
703,1613159	1,113448381	703,1603394	0,381219983	703,1508179	0,481791228	703,1508179	0,453238726	703,1603394	0,383293778	703,1613159	1,197083354	703,1613159	1,429238558	703,1613159	0,989878595	703,1603394	0,510647833	703,1508179	0,457696229	703,1508179	0,373802394	703,1508179	0,478957891
703,1862183	0,770991564	703,1852417	0,322232068	703,1757202	0,337131977	703,1757202	0,285548538	703,1852417	0,346664816	703,1862183	1,00685668	703,1862183	1,075584531	703,1862183	0,80129087	703,1852417	0,417281687	703,1757202	0,346567988	703,1757202	0,230221987	703,1757202	0,322689354
703,2111206	0,611642182	703,210144	0,280979812	703,2006226	0,277671427	703,2006226	0,250898242	703,210144	0,292193949	703,2111206	0,805329859	703,2111206	0,835144639	703,2111206	0,650784314	703,210144	0,352403164	703,2006226	0,295124739	703,2006226	0,200004235	703,2006226	0,270777524
703,2360229	0,488045484	703,2350464	0,184826121	703,2255249	0,217123806	703,2255249	0,221010461	703,2350464	0,194706619	703,2360229	0,616694272	703,2360229	0,659811139	703,2360229	0,51513654	703,2350464	0,245706365	703,2255249	0,233041018	703,2255249	0,194178119	703,2255249	0,222854763
703,2609253	0,381076634	703,2599487	0,180502683	703,2504272	0,162440643	703,2504272	0,163055688	703,2599487	0,183708027	703,2609253	0,471463054	703,2609253	0,504626274	703,2609253	0,396329135	703,2599487	0,232203096	703,2504272	0,170980647	703,2504272	0,141873881	703,2504272	0,159074768
703,2858276	0,34243831	703,2848511	0,217752814	703,2753296	0,145262569	703,2753296	0,153663829	703,2848511	0,199129313	703,2858276	0,393107772	703,2858276	0,407459319	703,2858276	0,334026963	703,2848511	0,277064502	703,2753296	0,142434672	703,2753296	0,124840081	703,2753296	0,135618225
703,31073	0,338294595	703,3097534	0,213720158	703,3002319	0,175449878	703,3002319	0,213061869	703,3097534	0,175495088	703,31073	0,326153785	703,31073	0,3650769	703,31073	0,286954671	703,3097534	0,281688064	703,3002319	0,159085512	703,3002319	0,180366933	703,3002319	0,170036674
703,3356323	0,281093717	703,3346558	0,220860884	703,3251343	0,165894866	703,3251343	0,222465262	703,3346558	0,150767475	703,3356323	0,234482348	703,3356323	0,272915483	703,3356323	0,213031173	703,3346558	0,331626147	703,3251343	0,142896205	703,3251343	0,197020337	703,3251343	0,159585699
703,3605347	0,33258009	703,3595581	0,412121594	703,3500366	0,172794357	703,3500366	0,26516673	703,3595581	0,238042861	703,3605347	0,239606157	703,3605347	0,285396874	703,3605347	0,230683491	703,3595581	0,605340242	703,3500366	0,132370442	703,3500366	0,224413425	703,3500366	0,144899741
703,385437	0,476026237	703,3844604	0,716447413	703,374939	0,285186529	703,374939	0,485149533	703,3844604	0,347963214	703,385437	0,262060553	703,385437	0,34805271	703,385437	0,281784624	703,3844604	1,002506971	703,374939	0,200786531	703,374939	0,423357487	703,374939	0,249164581
703,4103394	0,585040331	703,4093628	1,155584335	703,3998413	0,436366826	703,3998413	0,751707375	703,4093628	0,543876827	703,4103394	0,252232313	703,4103394	0,383076638	703,4103394	0,319516897	703,4093628	1,514082313	703,3998413	0,286727846	703,3998413	0,686200738	703,3998413	0,373479515
703,4352417	0,786100864	703,4342651	1,799464226	703,4247437	0,663282216	703,4247437	1,014356017	703,4342651	0,953626812	703,4352417	0,346025318	703,4352417	0,517673194	703,4352417	0,482524663	703,4342651	2,118990183	703,4247437	0,421735674	703,4247437	0,912756085	703,4247437	0,537654161
703,460144	1,011546493	703,4591675	2,294478893	703,449646	1,003550887	703,449646	1,24933672	703,4591675	1,423385262	703,460144	0,49281323	703,460144	0,771754622	703,460144	0,746689141	703,4591675	2,440595627	703,449646	0,707328379	703,449646	1,115963817	703,449646	0,837435365
703,4850464	1,01062119	703,4840698	2,397021532	703,4745483	1,217981696	703,4745483	1,217937946	703,4840698	1,79167676	703,4850464	0,623108327	703,4850464	0,928788841	703,4850464	0,975848317	703,4840698	2,293330431	703,4745483	0,9880234	703,4745483	1,111462593	703,4745483	1,051590681
703,5099487	0,882050753	703,5089722	2,221071243	703,4994507	1,220896959	703,4994507	0,940301001	703,5089722	2,032150507	703,5099487	0,795467377	703,5099487	1,027303457	703,5099487	1,198888779	703,5089722	1,927430511	703,4994507	1,1355443	703,4994507	0,867960036	703,4994507	1,045895338
703,5348511	0,734928191	703,5338745	1,796551824	703,524353	1,075387001	703,524353	0,68976289	703,5338745	1,963051915	703,5348511	0,920069635	703,5348511	1,070265651	703,5348511	1,325188279	703,5338745	1,441345572	703,524353	1,158373594	703,524353	0,643181026	703,524353	0,953060865
703,5597534	0,501221061	703,5588379	1,255964518	703,5492554	0,799143314	703,5492554	0,459025472	703,5588379	1,624417543	703,5597534	0,851343095	703,5597534	0,888151944	703,5597534	1,193040252	703,5588379	0,922679901	703,5492554	0,980997741	703,5492554	0,450426131	703,5492554	0,743470192
703,5846558	0,313799888	703,5837402	0,876600564	703,5741577	0,505611479	703,5741577	0,247438401	703,5837402	1,287430286	703,5846558	0,708851695	703,5846558	0,646797121	703,5846558	0,946567357	703,5837402	0,632316709	703,5741577	0,690592587	703,5741577	0,253448397	703,5741577	0,473924577
703,6095581	0,272181541	703,6086426	0,623021901	703,5990601	0,3488428	703,5990601	0,199833497	703,6086426	0,960071564	703,6095581	0,57841301	703,6095581	0,504592896	703,6095581	0,731425703	703,6086426	0,450182706	703,5990601	0,491401315	703,5990601	0,185651034	703,5990601	0,331962377
703,6344604	0,203447089	703,6335449	0,373842388	703,6239624	0,237424389	703,6239624	0,1717152	703,6335449	0,633248627	703,6344604	0,392491072	703,6344604	0,350443155	703,6344604	0,506793022	703,6335449	0,259805977	703,6239624	0,337634474	703,6239624	0,171663612	703,6239624	0,245253235
703,6593628	0,131311834	703,6584473	0,269518405	703,6488647	0,139586806	703,6488647	0,097194068	703,6584473	0,460407138	703,6593628	0,260737181	703,6593628	0,220659092	703,6593628	0,332010537	703,6584473	0,202760801	703,6488647	0,195872024	703,6488647	0,097164229	703,6488647	0,134927571
703,6843262	0,143807873	703,6833496	0,239118367	703,6737671	0,13032046	703,6737671	0,106675982	703,6833496	0,358240962	703,6843262	0,227681279	703,6843262	0,206476852	703,6843262	0,26773414	703,6833496	0,203701466	703,6737671	0,1552203	703,6737671	0,094121717	703,6737671	0,119059518
703,7092285	0,127843186	703,708252	0,141629741	703,6986694	0,125316873	703,6986694	0,12877056	703,708252	0,223419845	703,7092285	0,160267577	703,7092285	0,167971209	703,7092285	0,192201898	703,708252	0,123851508	703,6986694	0,14333874	703,6986694	0,122694381	703,6986694	0,131891757
703,7341309	0,085242294	703,7331543	0,1143905	703,7235718	0,079785265	703,7235718	0,067484945	703,7331543	0,173831075	703,7341309	0,097778566	703,7341309	0,106134884	703,7341309	0,123843677	703,7331543	0,102562159	703,7235718	0,090000264	703,7235718	0,069853365	703,7235718	0,075671166
703,7590332	0,100952432	703,7580566	0,142910361	703,7485352	0,081690274	703,7485352	0,059739284	703,7580566	0,174281865	703,7590332	0,113185145	703,7590332	0,119667128	703,7590332	0,131471187	703,7580566	0,128923357	703,7485352	0,086298771	703,7485352	0,055576149	703,7485352	0,068211772
703,7839355	0,091574498	703,782959	0,085050203	703,7734375	0,086652704	703,7734375	0,085760027	703,782959	0,109001629	703,7839355	0,089533202	703,7839355	0,109033324	703,7839355	0,111542016	703,782959	0,070900157	703,7734375	0,098500594	703,7734375	0,088895507	703,7734375	0,096011594
703,8088379	0,047037091	703,8078613	0,059820008	703,7983398	0,04641166	703,7983398	0,043959606	703,8078613	0,083011582	703,8088379	0,055517212	703,8088379	0,061338205	703,8088379	0,068186402	703,8078613	0,052564058	703,7983398	0,055462949	703,7983398	0,049381848	703,7983398	0,052179579
703,8337402	0,063963994	703,8327637	0,095819063	703,8232422	0,042629212	703,8232422	0,036574855	703,8327637	0,108468153	703,8337402	0,071689688	703,8337402	0,071311519	703,8337402	0,080231085	703,8327637	0,089720495	703,8232422	0,043893252	703,8232422	0,035947163	703,8232422	0,038510531
703,8586426	0,091787584	703,857666	0,071269728	703,8481445	0,063389741	703,8481445	0,072380282	703,857666	0,074468784	703,8586426	0,078220181	703,8586426	0,089102194	703,8586426	0,087404609	703,857666	0,063780934	703,8481445	0,066104442	703,8481445	0,075953573	703,8481445	0,071626462
703,8835449	0,061300237	703,8825684	0,048496805	703,8730469	0,055128217	703,8730469	0,065687858	703,8825684	0,053310871	703,8835449	0,047038525	703,8835449	0,063650377	703,8835449	0,057419259	703,8825684	0,047472078	703,8730469	0,060010292	703,8730469	0,078258939	703,8730469	0,062999718
703,9084473	0,045768838	703,9074707	0,06933298	703,8979492	0,03206842	703,8979492	0,038757343	703,9074707	0,071245901	703,9084473	0,039394431	703,9084473	0,043825191	703,9084473	0,045954105	703,9074707	0,067768067	703,8979492	0,036223769	703,8979492	0,042732183	703,8979492	0,033060238
703,9333496	0,093100399	703,932373	0,094059266	703,9228516	0,056114133	703,9228516	0,066673964	703,932373	0,083944894	703,9333496	0,063120142	703,9333496	0,079842336	703,9333496	0,071734287	703,932373	0,100953907	703,9228516	0,051595375	703,9228516	0,062829398	703,9228516	0,053566772
703,958252	0,102774009	703,9572754	0,056140758	703,9477539	0,063598335	703,9477539	0,105440326	703,9572754	0,046594121	703,958252	0,05003193	703,958252	0,072351709	703,958252	0,060192417	703,9572754	0,071371384	703,9477539	0,064275883	703,9477539	0,103643559	703,9477539	0,075590774
703,9831543	0,138285995	703,9821777	0,083053671	703,9726563	0,045504816	703,9726563	0,098333642	703,9821777	0,062575549	703,9831543	0,040901612	703,9831543	0,061280183	703,9831543	0,050570734	703,9821777	0,146454573	703,9726563	0,040503237	703,9726563	0,083160535	703,9726563	0,04738827
704,0080566	0,37085104	704,0070801	0,161666527	703,9975586	0,087925032	703,9975586	0,203123495	704,0070801	0,095187493	704,0080566	0,080183752	704,0080566	0,130679294	704,0080566	0,087090328	704,0070801	0,335612178	703,9975586	0,060975291	703,9975586	0,141993865	703,9975586	0,084178053
704,032959	0,784027159	704,0319824	0,199329808	704,0224609	0,153053373	704,0224609	0,395487279	704,0319824	0,084052958	704,032959	0,10805922	704,032959	0,238886952	704,032959	0,122138456	704,0319824	0,519797027	704,0224609	0,101100795	704,0224609	0,28286168	704,0224609	0,153650314
704,0578613	1,419056773	704,0568848	0,332361817	704,0473633	0,208706006	704,0473633	0,58653295	704,0568848	0,140906274	704,0578613	0,179353967	704,0578613	0,436202288	704,0578613	0,189462081	704,0568848	0,838379323	704,0473633	0,109605744	704,0473633	0,399294078	704,0473633	0,186149642
704,0827637	2,16714859	704,0817871	0,518804789	704,0722656	0,364657551	704,0722656	0,840195179	704,0817871	0,260928601	704,0827637	0,414935321	704,0827637	0,87155664	704,0827637	0,398427993	704,0817871	1,116068602	704,0722656	0,194892675	704,0722656	0,558457375	704,0722656	0,314207226
704,107666	2,431687117	704,1066895	0,539326727	704,097168	0,546229362	704,097168	0,931040168	704,1066895	0,302636445	704,107666	0,70264256	704,107666	1,358788729	704,107666	0,649277985	704,1066895	1,053479552	704,097168	0,332089812	704,097168	0,650653124	704,097168	0,495818466
704,1325684	2,0250144	704,1315918	0,489958316	704,1220703	0,574619174	704,1220703	0,718561232	704,1315918	0,344212502	704,1325684	1,002000928	704,1325684	1,634317636	704,1325684	0,859009743	704,1315918	0,845331132	704,1220703	0,396444917	704,1220703	0,524590969	704,1220703	0,519090593
704,1574707	1,479002237	704,1564941	0,449467033	704,1469727	0,516242981	704,1469727	0,508094311	704,1564941	0,385598928	704,1574707	1,236501217	704,1574707	1,627128363	704,1574707	0,998562098	704,1564941	0,677220881	704,1469727	0,422252536	704,1469727	0,373337954	704,1469727	0,469872266
704,182373	1,009705424	704,1813965	0,314522058	704,171875	0,433362007	704,171875	0,395295262	704,1813965	0,309312165	704,182373	1,174547911	704,182373	1,33968699	704,182373	0,913056672	704,1813965	0,451853126	704,171875	0,406009585	704,171875	0,309028149	704,171875	0,41944924
704,2072754	0,636785805	704,2062988	0,198656887	704,1967773	0,29303804	704,1967773	0,250254691	704,2062988	0,225004017	704,2072754	0,909375906	704,2072754	0,938400745	704,2072754	0,68723923	704,2062988	0,292820364	704,1967773	0,301916778	704,1967773	0,209458724	704,1967773	0,289395213
704,2321777	0,46627304	704,2312012	0,203170151	704,2216797	0,196969017	704,2216797	0,165154889	704,2312012	0,217434078	704,2321777	0,690056622	704,2321777	0,682259023	704,2321777	0,529381573	704,2312012	0,284522951	704,2216797	0,211645454	704,2216797	0,129486278	704,2216797	0,188433751
704,2570801	0,387683988	704,2561646	0,161828101	704,246582	0,182441995	704,246582	0,190940738	704,2561646	0,16153726	704,2570801	0,504601061	704,2570801	0,518598497	704,2570801	0,396950811	704,2561646	0,227263704	704,246582	0,187223285	704,246582	0,157343149	704,246582	0,183461651
704,2819824	0,27654627	704,2810669	0,115570277	704,2714844	0,136933118	704,2714844	0,163383201	704,2810669	0,113799937	704,2819824	0,334341139	704,2819824	0,345071197	704,2819824	0,259391069	704,2810669	0,183367148	704,2714844	0,136095241	704,2714844	0,146427423	704,2714844	0,141892165
704,3068848	0,290832996	704,3059692	0,182785496	704,2963867	0,114519186	704,2963867	0,156884372	704,3059692	0,142707705	704,3068848	0,275362641	704,3068848	0,290195853	704,3068848	0,223392352	704,3059692	0,292503089	704,2963867	0,098964848	704,2963867	0,118833125	704,2963867	0,100236841
704,3317871	0,371266514	704,3308716	0,263874918	704,3212891	0,16205734	704,3212891	0,258073419	704,3308716	0,157302484	704,3317871	0,249847636	704,3317871	0,301473856	704,3317871	0,224665284	704,3308716	0,4403117	704,3212891	0,131876752	704,3212891	0,202068657	704,3212891	0,153605744
704,3566895	0,386636049	704,3557739	0,405249447	704,3462524	0,203261063	704,3462524	0,364559799	704,3557739	0,185773462	704,3566895	0,188908562	704,3566895	0,264645398	704,3566895	0,19751136	704,3557739	0,680211663	704,3462524	0,149648488	704,3462524	0,304832369	704,3462524	0,189734966
704,3815918	0,485747665	704,3806763	0,803494751	704,3711548	0,281970173	704,3711548	0,528902829	704,3806763	0,373846024	704,3815918	0,233781308	704,3815918	0,310939223	704,3815918	0,25988552	704,3806763	1,206100225	704,3711548	0,183068797	704,3711548	0,442322969	704,3711548	0,235228047
704,4064941	0,689823329	704,4055786	1,323908567	704,3960571	0,505751431	704,3960571	0,848074257	704,4055786	0,651005983	704,4064941	0,316306978	704,4064941	0,461947381	704,4064941	0,396524251	704,4055786	1,757819653	704,3960571	0,340727329	704,3960571	0,726047754	704,3960571	0,438671231
704,4314575	0,805781484	704,430481	1,789159179	704,4209595	0,764689744	704,4209595	1,083639383	704,430481	0,998197854	704,4314575	0,369233131	704,4314575	0,564409018	704,4314575	0,533515871	704,430481	2,122660398	704,4209595	0,55242306	704,4209595	0,963887215	704,4209595	0,679241538
704,4563599	0,884919643	704,4553833	2,178193331	704,4458618	0,979282618	704,4458618	1,142833471	704,4553833	1,455741644	704,4563599	0,467619121	704,4563599	0,683374166	704,4563599	0,697936833	704,4553833	2,317805767	704,4458618	0,791786373	704,4458618	1,031318903	704,4458618	0,858988404
704,4812622	0,980201066	704,4802856	2,280655146	704,4707642	1,124062419	704,4707642	1,13403976	704,4802856	1,733795166	704,4812622	0,62234211	704,4812622	0,860850334	704,4812622	0,924437344	704,4802856	2,247587681	704,4707642	0,984415352	704,4707642	1,024381042	704,4707642	0,995362639
704,5061646	0,928798199	704,505188	2,112100124	704,4956665	1,167068124	704,4956665	1,01503408	704,505188	1,834145546	704,5061646	0,76970768	704,5061646	1,011591434	704,5061646	1,157652259	704,505188	1,917724729	704,4956665	1,122993946	704,4956665	0,940130174	704,4956665	1,07459867
704,5310669	0,672913313	704,5300903	1,705160975	704,5205688	1,014184594	704,5205688	0,698004067	704,5300903	1,780335188	704,5310669	0,830545366	704,5310669	0,976735532	704,5310669	1,222109437	704,5300903	1,405479789	704,5205688	1,113027453	704,5205688	0,670328915	704,5205688	0,957819939
704,5559692	0,48954004	704,5549927	1,323497891	704,5454712	0,752680242	704,5454712	0,432208031	704,5549927	1,602013588	704,5559692	0,855941236	704,5559692	0,876114845	704,5559692	1,195796132	704,5549927	1,025277734	704,5454712	0,951844513	704,5454712	0,411216587	704,5454712	0,720276415
704,5808716	0,362852454	704,579895	0,915229261	704,5703735	0,540842891	704,5703735	0,31878221	704,579895	1,254593134	704,5808716	0,745659411	704,5808716	0,708829761	704,5808716	1,007769346	704,579895	0,672710955	704,5703735	0,74294728	704,5703735	0,30802986	704,5703735	0,546140313
704,6057739	0,208991572	704,6047974	0,57789886	704,5952759	0,337399751	704,5952759	0,200587198	704,6047974	0,903051436	704,6057739	0,530792892	704,6057739	0,453801721	704,6057739	0,713978052	704,6047974	0,407917321	704,5952759	0,49912551	704,5952759	0,204794586	704,5952759	0,354060531
704,6306763	0,1705091	704,6296997	0,435604781	704,6201782	0,203499749	704,6201782	0,118249863	704,6296997	0,682076275	704,6306763	0,403720498	704,6306763	0,325882047	704,6306763	0,522117376	704,6296997	0,334129632	704,6201782	0,307536781	704,6201782	0,112944759	704,6201782	0,199474543
704,6555786	0,176945701	704,6546021	0,312592953	704,6450806	0,172773033	704,6450806	0,139583066	704,6546021	0,48765099	704,6555786	0,2979469	704,6555786	0,267261833	704,6555786	0,387101829	704,6546021	0,247669488	704,6450806	0,232620284	704,6450806	0,12681216	704,6450806	0,176793888
704,680481	0,110598139	704,6795044	0,184136242	704,6699829	0,128833935	704,6699829	0,120445989	704,6795044	0,311544836	704,680481	0,178991392	704,680481	0,165118188	704,680481	0,240343273	704,6795044	0,143816009	704,6699829	0,166723192	704,6699829	0,117544532	704,6699829	0,136942953
704,7053833	0,098083548	704,7044067	0,178410888	704,6948853	0,088012144	704,6948853	0,076325089	704,7044067	0,259600013	704,7053833	0,144041345	704,7053833	0,127270207	704,7053833	0,18426162	704,7044067	0,15886125	704,6948853	0,106093533	704,6948853	0,064695552	704,6948853	0,078475118
704,7302856	0,133192122	704,7293091	0,16123794	704,7197876	0,107388705	704,7197876	0,110110857	704,7293091	0,201195464	704,7302856	0,146026582	704,7302856	0,14565298	704,7302856	0,170313582	704,7293091	0,143891171	704,7197876	0,113259971	704,7197876	0,088758789	704,7197876	0,103430569
704,755188	0,087891631	704,7542114	0,089043126	704,7446899	0,096937142	704,7446899	0,092784181	704,7542114	0,125283569	704,755188	0,087838039	704,755188	0,097985603	704,755188	0,106647529	704,7542114	0,078749076	704,7446899	0,099429645	704,7446899	0,092220828	704,7446899	0,097609006
704,7800903	0,068358727	704,7791138	0,099296093	704,7695923	0,05890334	704,7695923	0,047043677	704,7791138	0,128261656	704,7800903	0,07785812	704,7800903	0,078186549	704,7800903	0,087820731	704,7791138	0,093882203	704,7695923	0,060829017	704,7695923	0,044695407	704,7695923	0,051069759
704,8049927	0,097178258	704,8040161	0,107038632	704,7944946	0,070108466	704,7944946	0,066187195	704,8040161	0,115874752	704,8049927	0,09835209	704,8049927	0,106832035	704,8049927	0,110905975	704,8040161	0,10231927	704,7944946	0,073400721	704,7944946	0,061436534	704,7944946	0,067156434
704,829895	0,065249734	704,8289185	0,058768585	704,819397	0,062338084	704,819397	0,072465636	704,8289185	0,065397143	704,829895	0,062206358	704,829895	0,072638966	704,829895	0,074433483	704,8289185	0,051829893	704,819397	0,067427866	704,819397	0,075653426	704,819397	0,070337966
704,8547974	0,05005338	704,8538208	0,073378548	704,8442993	0,034402993	704,8442993	0,039652158	704,8538208	0,078112908	704,8547974	0,047696725	704,8547974	0,049570668	704,8547974	0,054859828	704,8538208	0,073993154	704,8442993	0,037342507	704,8442993	0,039341062	704,8442993	0,033045337
704,8796997	0,090189479	704,8787231	0,097270451	704,8692017	0,058137618	704,8692017	0,063044846	704,8787231	0,090221159	704,8796997	0,071511783	704,8796997	0,082075268	704,8796997	0,080049641	704,8787231	0,103168897	704,8692017	0,05060124	704,8692017	0,057251386	704,8692017	0,05165476
704,9046021	0,090456128	704,9036255	0,054906592	704,894104	0,064965822	704,894104	0,086129025	704,9036255	0,049087647	704,9046021	0,05396102	704,9046021	0,07227312	704,9046021	0,064114772	704,9036255	0,05652716	704,894104	0,06008039	704,894104	0,086684085	704,894104	0,070097886
704,9295044	0,078571208	704,9285278	0,069075666	704,9190063	0,040533714	704,9190063	0,052814264	704,9285278	0,065301403	704,9295044	0,043090452	704,9295044	0,053526424	704,9295044	0,048414402	704,9285278	0,085021086	704,9190063	0,034892235	704,9190063	0,054391496	704,9190063	0,037766669
704,9544067	0,144009262	704,9534912	0,112347007	704,9439697	0,064284489	704,9439697	0,090450853	704,9534912	0,088106088	704,9544067	0,072421588	704,9544067	0,092970215	704,9544067	0,082073264	704,9534912	0,151501939	704,9439697	0,052234549	704,9439697	0,07530991	704,9439697	0,05608844
704,9793091	0,233253464	704,9783936	0,089839593	704,9688721	0,09063223	704,9688721	0,174965635	704,9783936	0,05769987	704,9793091	0,072643355	704,9793091	0,113770664	704,9793091	0,084266461	704,9783936	0,181673199	704,9688721	0,075277954	704,9688721	0,143178284	704,9688721	0,095077947
705,0042114	0,4637523	705,0032959	0,148637563	704,9937744	0,082428962	704,9937744	0,245130792	705,0032959	0,077128008	705,0042114	0,066839673	705,0042114	0,127055883	705,0042114	0,07696522	705,0032959	0,40557462	704,9937744	0,055569854	704,9937744	0,169306442	704,9937744	0,077683784
705,0291138	1,16880846	705,0281982	0,335008383	705,0186768	0,169771016	705,0186768	0,520936847	705,0281982	0,151549578	705,0291138	0,147439331	705,0291138	0,306430459	705,0291138	0,149844885	705,0281982	0,916759253	705,0186768	0,09076307	705,0186768	0,334643066	705,0186768	0,137139872
705,0540161	2,093252659	705,0531006	0,530464113	705,0435791	0,352236897	705,0435791	1,052614331	705,0531006	0,189713895	705,0540161	0,237209067	705,0540161	0,567455173	705,0540161	0,249340013	705,0531006	1,535268545	705,0435791	0,182939693	705,0435791	0,695396781	705,0435791	0,30298385
705,0789185	3,349694729	705,0780029	0,735161901	705,0684814	0,510809243	705,0684814	1,49799335	705,0780029	0,27263087	705,0789185	0,383143306	705,0789185	0,964070976	705,0789185	0,375567168	705,0780029	2,020122051	705,0684814	0,236965016	705,0684814	0,989742935	705,0684814	0,434153736
705,1038208	4,925760746	705,1029053	0,984094262	705,0933838	0,759937048	705,0933838	1,814624071	705,1029053	0,439186603	705,1038208	0,826288223	705,1038208	1,871459723	705,1038208	0,76150614	705,1029053	2,334298134	705,0933838	0,356191427	705,0933838	1,206129551	705,0933838	0,634155571
705,1287231	5,233735561	705,1278076	1,125435114	705,1182861	1,133385062	705,1182861	1,810177684	705,1278076	0,630084395	705,1287231	1,572774291	705,1287231	3,014523268	705,1287231	1,375937939	705,1278076	2,219967842	705,1182861	0,6270594	705,1182861	1,261808872	705,1182861	0,981022
705,1536255	4,115674973	705,15271	0,957366526	705,1431885	1,203854918	705,1431885	1,357654333	705,15271	0,685476065	705,1536255	2,287079096	705,1536255	3,577199221	705,1536255	1,882845402	705,15271	1,661954761	705,1431885	0,847066462	705,1431885	1,000604033	705,1431885	1,103935242
705,1785889	2,739220142	705,1776123	0,770617127	705,1680908	0,952682197	705,1680908	0,837644458	705,1776123	0,691334903	705,1785889	2,630888462	705,1785889	3,291472435	705,1785889	2,022236109	705,1776123	1,181339741	705,1680908	0,82749939	705,1680908	0,636585295	705,1680908	0,8947469
705,2034912	1,790070176	705,2025146	0,58644557	705,1929932	0,697753191	705,1929932	0,551309466	705,2025146	0,596007228	705,2034912	2,433207989	705,2034912	2,599180698	705,2034912	1,8141675	705,2025146	0,833897352	705,1929932	0,692295909	705,1929932	0,432119876	705,1929932	0,66878438
705,2283936	1,148975253	705,227417	0,363786578	705,2178955	0,477187306	705,2178955	0,387092024	705,227417	0,415305018	705,2283936	1,841966152	705,2283936	1,815219641	705,2283936	1,351936102	705,227417	0,527854264	705,2178955	0,508202791	705,2178955	0,32536459	705,2178955	0,477147937
705,2532959	0,762755036	705,2523193	0,285730034	705,2427979	0,288027257	705,2427979	0,243712336	705,2523193	0,329128385	705,2532959	1,266094208	705,2532959	1,196650743	705,2532959	0,931905687	705,2523193	0,417349577	705,2427979	0,318831503	705,2427979	0,201393232	705,2427979	0,279924959
705,2781982	0,624268591	705,2772217	0,282801956	705,2677002	0,231949866	705,2677002	0,233498827	705,2772217	0,283571839	705,2781982	0,904215872	705,2781982	0,859922707	705,2781982	0,683335066	705,2772217	0,421174765	705,2677002	0,235921919	705,2677002	0,183853507	705,2677002	0,221244797
705,3031006	0,532891154	705,302124	0,240063056	705,2926025	0,219663158	705,2926025	0,277045995	705,302124	0,197981626	705,3031006	0,621355712	705,3031006	0,648106098	705,3031006	0,489563167	705,302124	0,412470967	705,2926025	0,205056787	705,2926025	0,231672034	705,2926025	0,220528364
705,3280029	0,486009449	705,3270264	0,353342444	705,3175049	0,184288979	705,3175049	0,319559246	705,3270264	0,215337396	705,3280029	0,451553315	705,3280029	0,480973154	705,3280029	0,357465357	705,3270264	0,696913123	705,3175049	0,155966774	705,3175049	0,251931578	705,3175049	0,173829436
705,3529053	0,69846797	705,3519287	0,73531431	705,3424072	0,289214432	705,3424072	0,642699301	705,3519287	0,346383154	705,3529053	0,416279346	705,3529053	0,478969544	705,3529053	0,358157456	705,3519287	1,453794122	705,3424072	0,19301872	705,3424072	0,466614425	705,3424072	0,241004601
705,3778076	1,126196265	705,3768311	1,315208435	705,3673096	0,58182168	705,3673096	1,35165453	705,3768311	0,553524375	705,3778076	0,412555873	705,3778076	0,550841928	705,3778076	0,412783921	705,3768311	2,495538712	705,3673096	0,341211021	705,3673096	0,946267843	705,3673096	0,48211363
705,40271	1,655654788	705,4017334	2,113278389	705,3922119	1,07610023	705,3922119	2,063430071	705,4017334	1,022289991	705,40271	0,505679309	705,40271	0,738630235	705,40271	0,575040936	705,4017334	3,468462467	705,3922119	0,624076962	705,3922119	1,411652446	705,3922119	0,859379828
705,4276123	2,033499002	705,4266357	2,789153099	705,4171143	1,720457792	705,4171143	2,308374166	705,4266357	1,697958827	705,4276123	0,877256691	705,4276123	1,147592664	705,4276123	0,98164016	705,4266357	3,834945202	705,4171143	1,172612309	705,4171143	1,608116031	705,4171143	1,392824411
705,4525146	1,986299872	705,4515381	2,900219202	705,4420166	2,094730377	705,4420166	2,032305717	705,4515381	2,185271025	705,4525146	1,327613831	705,4525146	1,526966214	705,4525146	1,442189455	705,4515381	3,414155006	705,4420166	1,785707712	705,4420166	1,521335125	705,4420166	1,785131097
705,477417	1,62084651	705,4764404	2,604932785	705,4669189	1,915598989	705,4669189	1,490034461	705,4764404	2,365089893	705,477417	1,646167994	705,477417	1,606259108	705,477417	1,714090109	705,4764404	2,717729092	705,4669189	1,984544396	705,4669189	1,197626352	705,4669189	1,695337296
705,5023193	1,277205825	705,5013428	2,208063364	705,4918213	1,496532559	705,4918213	1,008784652	705,5013428	2,301936626	705,5023193	1,735413671	705,5023193	1,546490669	705,5023193	1,775631666	705,5013428	2,089635849	705,4918213	1,768446207	705,4918213	0,848833978	705,4918213	1,367125154
705,5272217	0,94175607	705,5262451	1,685709	705,5167236	1,126717687	705,5167236	0,71338588	705,5262451	1,980129361	705,5272217	1,550846696	705,5272217	1,373637557	705,5272217	1,635725498	705,5262451	1,455462098	705,5167236	1,428093076	705,5167236	0,623046875	705,5167236	1,067822933
705,552124	0,599296749	705,5511475	1,171004653	705,541687	0,757783055	705,541687	0,447514951	705,5511475	1,558922172	705,552124	1,219180703	705,552124	1,049459934	705,552124	1,312072277	705,5511475	0,947324812	705,541687	1,032956958	705,541687	0,409766644	705,541687	0,740607977
705,5770264	0,426325172	705,5760498	0,853815436	705,5665894	0,482732207	705,5665894	0,273766369	705,5760498	1,230533719	705,5770264	0,946160614	705,5770264	0,769887865	705,5770264	1,034325123	705,5760498	0,695047855	705,5665894	0,68996942	705,5665894	0,237407118	705,5665894	0,467073679
705,6019287	0,352347761	705,6009521	0,598742008	705,5914917	0,350635588	705,5914917	0,240989909	705,6009521	0,900498271	705,6019287	0,702502429	705,6019287	0,593959808	705,6019287	0,776375234	705,6009521	0,489930719	705,5914917	0,491957754	705,5914917	0,206606597	705,5914917	0,348723292
705,6268311	0,263255805	705,6259155	0,376434177	705,616394	0,241466269	705,616394	0,184969693	705,6259155	0,611173689	705,6268311	0,510374486	705,6268311	0,441527754	705,6268311	0,569913685	705,6259155	0,309363961	705,616394	0,335122079	705,616394	0,172191381	705,616394	0,248405233
705,6517334	0,206222892	705,6508179	0,317859054	705,6412964	0,162257373	705,6412964	0,118060887	705,6508179	0,494667649	705,6517334	0,390194893	705,6517334	0,324000001	705,6517334	0,431654006	705,6508179	0,28053546	705,6412964	0,227612957	705,6412964	0,107031666	705,6412964	0,159352973
705,6766357	0,209193513	705,6757202	0,298528403	705,6661987	0,153192922	705,6661987	0,13170597	705,6757202	0,423726827	705,6766357	0,319439411	705,6766357	0,278098077	705,6766357	0,343047798	705,6757202	0,285854429	705,6661987	0,191956654	705,6661987	0,105482645	705,6661987	0,14659816
705,7015381	0,195733756	705,7006226	0,19450964	705,6911011	0,15689455	705,6911011	0,164801195	705,7006226	0,2774508	705,7015381	0,2387885	705,7015381	0,234099537	705,7015381	0,256827414	705,7006226	0,191769466	705,6911011	0,180673003	705,6911011	0,144730747	705,6911011	0,162739664
705,7264404	0,139713138	705,7255249	0,1408609	705,7160034	0,108703591	705,7160034	0,107945867	705,7255249	0,2045369	705,7264404	0,161770582	705,7264404	0,149909735	705,7264404	0,171225801	705,7255249	0,148682222	705,7160034	0,119223475	705,7160034	0,099774383	705,7160034	0,104055226
705,7513428	0,176030919	705,7504272	0,176150396	705,7409058	0,098543845	705,7409058	0,090661958	705,7504272	0,205929726	705,7513428	0,16299428	705,7513428	0,159357488	705,7513428	0,170631692	705,7504272	0,190147057	705,7409058	0,099805154	705,7409058	0,072402753	705,7409058	0,083724417
705,7762451	0,179637924	705,7753296	0,125614166	705,7658081	0,11966864	705,7658081	0,124900229	705,7753296	0,146388382	705,7762451	0,141722828	705,7762451	0,159560144	705,7762451	0,152538806	705,7753296	0,133194789	705,7658081	0,120617919	705,7658081	0,111217774	705,7658081	0,118454844
705,8011475	0,104991905	705,8002319	0,084279403	705,7907104	0,084358677	705,7907104	0,07696683	705,8002319	0,106845923	705,8011475	0,100564152	705,8011475	0,113447309	705,8011475	0,105869547	705,8002319	0,088791683	705,7907104	0,084722944	705,7907104	0,082187764	705,7907104	0,084593862
705,8260498	0,106378712	705,8251343	0,122250989	705,8156128	0,062054593	705,8156128	0,053393696	705,8251343	0,130201176	705,8260498	0,120733015	705,8260498	0,118843459	705,8260498	0,11367619	705,8251343	0,127520829	705,8156128	0,062581733	705,8156128	0,04394022	705,8156128	0,05384117
705,8509521	0,115742192	705,8500366	0,100460961	705,8405151	0,084203765	705,8405151	0,089571096	705,8500366	0,101847954	705,8509521	0,113908768	705,8509521	0,128794521	705,8509521	0,115383774	705,8500366	0,102341376	705,8405151	0,083881862	705,8405151	0,087077796	705,8405151	0,086660668
705,8758545	0,07145045	705,874939	0,058510538	705,8654175	0,061910991	705,8654175	0,068680786	705,874939	0,068433367	705,8758545	0,065562531	705,8758545	0,075160779	705,8758545	0,06812422	705,874939	0,063299373	705,8654175	0,065412633	705,8654175	0,075382322	705,8654175	0,068798497
705,9008179	0,091639213	705,8998413	0,096332483	705,8903198	0,046964876	705,8903198	0,047983177	705,8998413	0,094878905	705,9008179	0,077490963	705,9008179	0,084507614	705,9008179	0,082435824	705,8998413	0,107578233	705,8903198	0,044775486	705,8903198	0,042511143	705,8903198	0,039583065
705,9257202	0,131132334	705,9247437	0,098444276	705,9152222	0,07125859	705,9152222	0,091124602	705,9247437	0,088479787	705,9257202	0,091585398	705,9257202	0,117497884	705,9257202	0,098074883	705,9247437	0,112826027	705,9152222	0,068927415	705,9152222	0,08592096	705,9152222	0,074383631
705,9506226	0,108345486	705,949646	0,065704949	705,9401245	0,067037828	705,9401245	0,104164809	705,949646	0,058422625	705,9506226	0,058533672	705,9506226	0,080420978	705,9506226	0,065436095	705,949646	0,092439547	705,9401245	0,066320017	705,9401245	0,101684265	705,9401245	0,078956842
705,9755249	0,184203357	705,9745483	0,12011984	705,9650269	0,059031367	705,9650269	0,11906302	705,9745483	0,090859324	705,9755249	0,077798001	705,9755249	0,095790453	705,9755249	0,079827525	705,9745483	0,201852083	705,9650269	0,049113147	705,9650269	0,085013263	705,9650269	0,054670736
706,0004272	0,468942642	705,9994507	0,1842601	705,9899292	0,118013024	705,9899292	0,27227369	705,9994507	0,108585201	706,0004272	0,112311184	706,0004272	0,168667629	706,0004272	0,12002065	705,9994507	0,387902617	705,9899292	0,085326284	705,9899292	0,177910537	705,9899292	0,106910951
706,0253296	0,938628793	706,024353	0,238216892	706,0148315	0,168834016	706,0148315	0,464541286	706,024353	0,108666964	706,0253296	0,11599534	706,0253296	0,247792453	706,0253296	0,124226488	706,024353	0,656975389	706,0148315	0,109561935	706,0148315	0,309673041	706,0148315	0,163201198
706,0502319	1,800443649	706,0492554	0,452935994	706,0397339	0,25450331	706,0397339	0,719525158	706,0492554	0,211949021	706,0502319	0,224620983	706,0502319	0,498242915	706,0502319	0,232431233	706,0492554	1,166363358	706,0397339	0,133520603	706,0397339	0,450967222	706,0397339	0,20820722
706,0751343	3,012387276	706,0741577	0,688725352	706,0646362	0,460410923	706,0646362	1,149273038	706,0741577	0,330547601	706,0751343	0,501882374	706,0751343	1,037162185	706,0751343	0,484964043	706,0741577	1,636330605	706,0646362	0,253083676	706,0646362	0,741616607	706,0646362	0,387148708
706,1000366	3,774812698	706,0990601	0,790021896	706,0895386	0,688545287	706,0895386	1,358814955	706,0990601	0,414367676	706,1000366	0,863975585	706,1000366	1,704397798	706,1000366	0,784514844	706,0990601	1,729278088	706,0895386	0,389191151	706,0895386	0,932122469	706,0895386	0,601364434
706,124939	3,542417765	706,1239624	0,833806872	706,1144409	0,815734029	706,1144409	1,150901198	706,1239624	0,547453582	706,124939	1,356485844	706,124939	2,32237649	706,124939	1,150472283	706,1239624	1,538756847	706,1144409	0,511811078	706,1144409	0,810367167	706,1144409	0,718076646
706,1498413	2,722187757	706,1488647	0,742337465	706,1394043	0,8187989	706,1394043	0,850507319	706,1488647	0,593690991	706,1498413	1,830399394	706,1498413	2,572284937	706,1498413	1,465004802	706,1488647	1,188655972	706,1394043	0,628614068	706,1394043	0,622654855	706,1394043	0,745836556
706,1747437	1,81668365	706,1737671	0,515311778	706,1643066	0,650706172	706,1643066	0,588739395	706,1737671	0,491099387	706,1747437	1,896291256	706,1747437	2,243908644	706,1747437	1,434156656	706,1737671	0,789164424	706,1643066	0,601855874	706,1643066	0,464431077	706,1643066	0,632852435
706,199646	1,274713516	706,1986694	0,395823002	706,189209	0,430856794	706,189209	0,352508128	706,1986694	0,424760938	706,199646	1,68369019	706,199646	1,78189981	706,199646	1,237683773	706,1986694	0,589355409	706,189209	0,436998665	706,189209	0,28003633	706,189209	0,416719139
706,2245483	0,994039237	706,2235718	0,357979417	706,2141113	0,340560973	706,2141113	0,280954301	706,2235718	0,374890029	706,2245483	1,426208854	706,2245483	1,427603602	706,2245483	1,050118089	706,2235718	0,523821473	706,2141113	0,352817178	706,2141113	0,219394743	706,2141113	0,322610766
706,2494507	0,790027499	706,2484741	0,303921372	706,2390137	0,284804761	706,2390137	0,271120727	706,2484741	0,310843796	706,2494507	1,064237475	706,2494507	1,063477516	706,2494507	0,802179992	706,2484741	0,447185069	706,2390137	0,293923825	706,2390137	0,218891263	706,2390137	0,281315506
706,274353	0,611328423	706,2733765	0,222067729	706,263916	0,217579275	706,263916	0,23592411	706,2733765	0,217804268	706,274353	0,732305288	706,274353	0,754778326	706,274353	0,559127092	706,2733765	0,357829392	706,263916	0,21850802	706,263916	0,205797434	706,263916	0,218334332
706,2992554	0,558095694	706,2982788	0,268067986	706,2888184	0,166484192	706,2888184	0,198536098	706,2982788	0,224471509	706,2992554	0,572738349	706,2992554	0,605263591	706,2992554	0,446714997	706,2982788	0,429462522	706,2888184	0,151612535	706,2888184	0,160059586	706,2888184	0,154598817
706,3241577	0,59943223	706,3232422	0,321329176	706,3137207	0,198058024	706,3137207	0,281046629	706,3232422	0,22795932	706,3241577	0,494802028	706,3241577	0,566937864	706,3241577	0,408770174	706,3232422	0,534434319	706,3137207	0,16816698	706,3137207	0,223678008	706,3137207	0,186008662
706,3490601	0,586857796	706,3481445	0,390939295	706,338623	0,223369986	706,338623	0,387197316	706,3481445	0,220211267	706,3490601	0,394280672	706,3490601	0,491199195	706,3490601	0,339531004	706,3481445	0,725162327	706,338623	0,178118974	706,338623	0,321048111	706,338623	0,217228606
706,3739624	0,705551624	706,3730469	0,684581697	706,3635254	0,291672945	706,3635254	0,579277933	706,3730469	0,353602737	706,3739624	0,384068161	706,3739624	0,479625136	706,3739624	0,349666506	706,3730469	1,210103631	706,3635254	0,189163283	706,3635254	0,443342477	706,3635254	0,245655701
706,3988647	0,976866364	706,3979492	1,082166672	706,3884277	0,523917854	706,3884277	0,960534275	706,3979492	0,558162451	706,3988647	0,448048085	706,3988647	0,598896503	706,3988647	0,456591398	706,3979492	1,732907534	706,3884277	0,3248851	706,3884277	0,702829897	706,3884277	0,437785238
706,4237671	1,134999394	706,4228516	1,380433321	706,4133301	0,813746452	706,4133301	1,188211441	706,4228516	0,799886823	706,4237671	0,509868741	706,4237671	0,716441929	706,4237671	0,576416016	706,4228516	1,94953227	706,4133301	0,54031831	706,4133301	0,896536231	706,4133301	0,686253965
706,4486694	1,108543515	706,4477539	1,590028524	706,4382324	1,007679701	706,4382324	1,077417135	706,4477539	1,12099421	706,4486694	0,679894447	706,4486694	0,855119944	706,4486694	0,777109325	706,4477539	1,933517218	706,4382324	0,769490361	706,4382324	0,830905735	706,4382324	0,838434994
706,4735718	1,032062292	706,4726563	1,59753859	706,4631348	1,042936802	706,4631348	0,896113038	706,4726563	1,316946387	706,4735718	0,898361564	706,4735718	1,008853078	706,4735718	1,001711845	706,4726563	1,710749507	706,4631348	0,967861474	706,4631348	0,722782135	706,4631348	0,910183311
706,4984741	0,829379737	706,4975586	1,35743928	706,4880371	0,89625001	706,4880371	0,688082755	706,4975586	1,285398722	706,4984741	0,95065558	706,4984741	0,977600753	706,4984741	1,050576448	706,4975586	1,314378738	706,4880371	0,956593394	706,4880371	0,599485099	706,4880371	0,823951781
706,5233765	0,586870432	706,5224609	1,13310945	706,5129395	0,662062764	706,5129395	0,433568239	706,5224609	1,21442318	706,5233765	0,870836437	706,5233765	0,828594625	706,5233765	0,973921418	706,5224609	0,999331713	706,5129395	0,777040422	706,5129395	0,395968556	706,5129395	0,608797848
706,5482788	0,456457019	706,5473633	0,913280308	706,5378418	0,502723873	706,5378418	0,310890973	706,5473633	1,068042397	706,5482788	0,774058998	706,5482788	0,720759749	706,5482788	0,883989632	706,5473633	0,750733793	706,5378418	0,623603523	706,5378418	0,281009108	706,5378418	0,468994975
706,5731812	0,333148628	706,5722656	0,610692203	706,5627441	0,366902441	706,5627441	0,2470458	706,5722656	0,811101556	706,5731812	0,603879511	706,5731812	0,561988533	706,5731812	0,710072875	706,5722656	0,474446297	706,5627441	0,477638811	706,5627441	0,235478058	706,5627441	0,365772039
706,5980835	0,207545057	706,597168	0,42506966	706,5876465	0,220829174	706,5876465	0,140261546	706,597168	0,618529022	706,5980835	0,429491669	706,5980835	0,369893163	706,5980835	0,511671245	706,597168	0,330848843	706,5876465	0,303128421	706,5876465	0,133719385	706,5876465	0,217229307
706,6229858	0,201063916	706,6220703	0,350435466	706,6125488	0,169252276	706,6125488	0,118934289	706,6220703	0,491829604	706,6229858	0,346437544	706,6229858	0,299179226	706,6229858	0,400063545	706,6220703	0,296457499	706,6125488	0,220108435	706,6125488	0,100088701	706,6125488	0,15882954
706,6479492	0,176647335	706,6469727	0,220160678	706,6374512	0,156596273	706,6374512	0,146841824	706,6469727	0,323435664	706,6479492	0,252125174	706,6479492	0,239314437	706,6479492	0,295088053	706,6469727	0,188864857	706,6374512	0,18707183	706,6374512	0,129242167	706,6374512	0,160541371
706,6728516	0,1167036	706,671875	0,151334196	706,6623535	0,094429724	706,6623535	0,094019584	706,671875	0,2284614	706,6728516	0,164645717	706,6728516	0,141356602	706,6728516	0,186397061	706,671875	0,138495594	706,6623535	0,113811016	706,6623535	0,083840631	706,6623535	0,099240758
706,6977539	0,137093276	706,6967773	0,174064875	706,6872559	0,087846994	706,6872559	0,086367428	706,6967773	0,217846364	706,6977539	0,15787442	706,6977539	0,142561316	706,6977539	0,166209757	706,6967773	0,173955202	706,6872559	0,089663312	706,6872559	0,064266376	706,6872559	0,077314518
706,7226563	0,147289976	706,7216797	0,122997247	706,7121582	0,115677364	706,7121582	0,130651265	706,7216797	0,150938824	706,7226563	0,130817503	706,7226563	0,146739498	706,7226563	0,14280577	706,7216797	0,124994881	706,7121582	0,114320502	706,7121582	0,108581059	706,7121582	0,114449173
706,7475586	0,092721917	706,746582	0,079768099	706,7370605	0,086175703	706,7370605	0,082288302	706,746582	0,103883132	706,7475586	0,08432629	706,7475586	0,09315446	706,7475586	0,092725933	706,746582	0,081441179	706,7370605	0,083902702	706,7370605	0,07982599	706,7370605	0,079066209
706,7724609	0,096680716	706,7714844	0,115472212	706,7620239	0,065974161	706,7620239	0,052910242	706,7714844	0,125923619	706,7724609	0,09013021	706,7724609	0,095341668	706,7724609	0,097859293	706,7714844	0,123663627	706,7620239	0,064727299	706,7620239	0,045158505	706,7620239	0,053309202
706,7973633	0,118681923	706,7963867	0,120497279	706,7869263	0,093294956	706,7869263	0,086338341	706,7963867	0,116672076	706,7973633	0,10551057	706,7973633	0,118092887	706,7973633	0,1134734	706,7963867	0,117247	706,7869263	0,091935307	706,7869263	0,075526945	706,7869263	0,0859005
706,8222656	0,090239704	706,8212891	0,062119294	706,8118286	0,076803006	706,8118286	0,081952348	706,8212891	0,067300349	706,8222656	0,079419151	706,8222656	0,095664427	706,8222656	0,086810574	706,8212891	0,063990206	706,8118286	0,07907068	706,8118286	0,083007902	706,8118286	0,083580151
706,847168	0,053602133	706,8461914	0,070907868	706,836731	0,041477956	706,836731	0,038215928	706,8461914	0,079326816	706,847168	0,057076164	706,847168	0,053896323	706,847168	0,058091372	706,8461914	0,075665787	706,836731	0,042546455	706,836731	0,041515723	706,836731	0,03812148
706,8720703	0,082779691	706,8710938	0,105628163	706,8616333	0,055660125	706,8616333	0,054268822	706,8710938	0,098230489	706,8720703	0,075837322	706,8720703	0,085578516	706,8720703	0,080798902	706,8710938	0,110042773	706,8616333	0,05427539	706,8616333	0,049136594	706,8616333	0,050873134
706,8969727	0,087447166	706,8959961	0,063586384	706,8865356	0,069567285	706,8865356	0,087296829	706,8959961	0,057939161	706,8969727	0,063089281	706,8969727	0,080164619	706,8969727	0,074138373	706,8959961	0,065787219	706,8865356	0,067328654	706,8865356	0,087392785	706,8865356	0,077169657
706,921875	0,056566134	706,9208984	0,067176394	706,911438	0,040723629	706,911438	0,051251683	706,9208984	0,065454155	706,921875	0,044820312	706,921875	0,049283516	706,921875	0,052439477	706,9208984	0,075486466	706,911438	0,040758945	706,911438	0,052693959	706,911438	0,042115521
706,9467773	0,106628016	706,9458008	0,115986504	706,9363403	0,053618278	706,9363403	0,068060167	706,9458008	0,093552642	706,9467773	0,068839014	706,9467773	0,078028224	706,9467773	0,078648746	706,9458008	0,139838144	706,9363403	0,04898585	706,9363403	0,056854598	706,9363403	0,050779272
706,9716797	0,160579205	706,9707031	0,089385845	706,9612427	0,082542256	706,9612427	0,138578519	706,9707031	0,063921385	706,9716797	0,067207612	706,9716797	0,09749946	706,9716797	0,083589137	706,9707031	0,13799955	706,9612427	0,074093699	706,9612427	0,114930227	706,9612427	0,092020988
706,996582	0,243760958	706,9956055	0,105240978	706,986145	0,065094806	706,986145	0,167759076	706,9956055	0,06753391	706,996582	0,057588343	706,996582	0,0865058	706,996582	0,065638602	706,9956055	0,23221302	706,986145	0,054273475	706,986145	0,119844325	706,986145	0,065808401
707,0214844	0,61394614	707,0205688	0,229026601	707,0110474	0,109093025	707,0110474	0,303990841	707,0205688	0,125447661	707,0214844	0,104640074	707,0214844	0,18186219	707,0214844	0,115318172	707,0205688	0,534040391	707,0110474	0,065867163	707,0110474	0,186440602	707,0110474	0,089599498
707,0463867	1,289664984	707,0454712	0,332118303	707,0359497	0,226619318	707,0359497	0,607824624	707,0454712	0,14312984	707,0463867	0,169570327	707,0463867	0,373949766	707,0463867	0,184774399	707,0454712	0,887873709	707,0359497	0,135703102	707,0359497	0,404529065	707,0359497	0,2017093
707,0712891	2,21929574	707,0703735	0,489403993	707,0608521	0,348012507	707,0608521	0,925715685	707,0703735	0,206049129	707,0712891	0,291198313	707,0712891	0,675075531	707,0712891	0,292171568	707,0703735	1,299059868	707,0608521	0,183907881	707,0608521	0,616776049	707,0608521	0,295651317
707,0961914	3,080296993	707,0952759	0,72158891	707,0857544	0,540637374	707,0857544	1,153230071	707,0952759	0,364152193	707,0961914	0,61161083	707,0961914	1,26320231	707,0961914	0,564092338	707,0952759	1,588907957	707,0857544	0,280749917	707,0857544	0,769103527	707,0857544	0,456967354
707,1210938	3,14261961	707,1201782	0,751686752	707,1106567	0,756396055	707,1106567	1,118651748	707,1201782	0,455272853	707,1210938	1,038185835	707,1210938	1,883363962	707,1210938	0,897899091	707,1201782	1,417464852	707,1106567	0,465044826	707,1106567	0,789344549	707,1106567	0,677948058
707,1459961	2,387200832	707,1450806	0,612500846	707,1355591	0,744540036	707,1355591	0,80242008	707,1450806	0,46654436	707,1459961	1,392821431	707,1459961	2,106416702	707,1459961	1,119002342	707,1450806	1,033964038	707,1355591	0,553503871	707,1355591	0,601716161	707,1355591	0,696436703
707,1708984	1,618509054	707,1699829	0,514732003	707,1604614	0,583247602	707,1604614	0,503049612	707,1699829	0,47396934	707,1708984	1,571458817	707,1708984	1,92847681	707,1708984	1,18466723	707,1699829	0,775516689	707,1604614	0,512640595	707,1604614	0,380580753	707,1604614	0,541639864
707,1958008	1,102309823	707,1948853	0,386763871	707,1853638	0,439260185	707,1853638	0,373960853	707,1948853	0,389587164	707,1958008	1,419023871	707,1958008	1,518868089	707,1958008	1,043269873	707,1948853	0,556192935	707,1853638	0,44296062	707,1853638	0,294347614	707,1853638	0,431133211
707,2207031	0,729627669	707,2197876	0,244357586	707,2102661	0,303481072	707,2102661	0,269060254	707,2197876	0,273047715	707,2207031	1,051881313	707,2207031	1,047994256	707,2207031	0,758978605	707,2197876	0,370930016	707,2102661	0,32388401	707,2102661	0,229871586	707,2102661	0,30643785
707,2456055	0,553400218	707,2446899	0,237006083	707,2351685	0,19674547	707,2351685	0,179229915	707,2446899	0,246528357	707,2456055	0,773799717	707,2456055	0,743007958	707,2456055	0,562622309	707,2446899	0,355105847	707,2351685	0,211429507	707,2351685	0,144873753	707,2351685	0,189030766
707,2705078	0,507653654	707,2695923	0,230532065	707,2600708	0,191166267	707,2600708	0,204399228	707,2695923	0,207848608	707,2705078	0,588384688	707,2705078	0,601812363	707,2705078	0,447577238	707,2695923	0,339773208	707,2600708	0,186607584	707,2600708	0,166228458	707,2600708	0,183367774
707,2954102	0,41552487	707,2944946	0,178620338	707,2849731	0,166545749	707,2849731	0,209799796	707,2944946	0,144069046	707,2954102	0,411368191	707,2954102	0,444149345	707,2954102	0,323247761	707,2944946	0,29548943	707,2849731	0,157897711	707,2849731	0,187190071	707,2849731	0,16978018
707,3203125	0,388982475	707,319397	0,251591861	707,3098755	0,138736844	707,3098755	0,198716953	707,319397	0,182492763	707,3203125	0,340756744	707,3203125	0,373081356	707,3203125	0,26837343	707,319397	0,408792615	707,3098755	0,120544933	707,3098755	0,161555395	707,3098755	0,127858087
707,3452148	0,440360188	707,3442993	0,340782583	707,3347778	0,17759046	707,3347778	0,268735111	707,3442993	0,217557579	707,3452148	0,336632401	707,3452148	0,384271055	707,3452148	0,283212215	707,3442993	0,536951184	707,3347778	0,138177291	707,3347778	0,209094122	707,3347778	0,155387431
707,3701782	0,500302374	707,3692017	0,409402102	707,3597412	0,23760891	707,3597412	0,389467329	707,3692017	0,230618238	707,3701782	0,31312561	707,3701782	0,393635571	707,3701782	0,286445439	707,3692017	0,660835743	707,3597412	0,18284899	707,3597412	0,318121403	707,3597412	0,223884717
707,3950806	0,52942872	707,394104	0,572667062	707,3846436	0,299749613	707,3846436	0,50685811	707,394104	0,305553406	707,3950806	0,279485404	707,3950806	0,36719799	707,3950806	0,283555835	707,394104	0,89820528	707,3846436	0,214075148	707,3846436	0,408720702	707,3846436	0,269286007
707,4199829	0,669546843	707,4190063	0,879950464	707,4095459	0,423882067	707,4095459	0,624869823	707,4190063	0,506545901	707,4199829	0,348439038	707,4199829	0,457704782	707,4199829	0,380296439	707,4190063	1,214406729	707,4095459	0,289899588	707,4095459	0,485595882	707,4095459	0,350273073
707,4448853	0,76163578	707,4439087	1,076051116	707,4344482	0,597244978	707,4344482	0,716500103	707,4439087	0,679424405	707,4448853	0,426143438	707,4448853	0,584116101	707,4448853	0,508955956	707,4439087	1,300961375	707,4344482	0,448930383	707,4344482	0,599950194	707,4344482	0,515788317
707,4697876	0,692199886	707,468811	1,132118106	707,4593506	0,647833884	707,4593506	0,628677011	707,468811	0,825234711	707,4697876	0,478541702	707,4697876	0,626771808	707,4697876	0,602374077	707,468811	1,203001022	707,4593506	0,543962717	707,4593506	0,565369606	707,4593506	0,566090286
707,4946899	0,621788442	707,4937134	1,143400908	707,4842529	0,598575473	707,4842529	0,472991049	707,4937134	0,972017646	707,4946899	0,582293391	707,4946899	0,691065371	707,4946899	0,740438223	707,4937134	1,075093627	707,4842529	0,568642437	707,4842529	0,430765063	707,4842529	0,519142509
707,5195923	0,529795349	707,5186157	0,986453891	707,5091553	0,532517374	707,5091553	0,388637304	707,5186157	0,964414358	707,5195923	0,620142221	707,5195923	0,703311265	707,5195923	0,800408423	707,5186157	0,835794806	707,5091553	0,565099537	707,5091553	0,363026112	707,5091553	0,492866725
707,5444946	0,34519133	707,5435181	0,721738875	707,5340576	0,398605734	707,5340576	0,272098541	707,5435181	0,826709807	707,5444946	0,531305611	707,5444946	0,563714981	707,5444946	0,704607964	707,5435181	0,556871891	707,5340576	0,471085131	707,5340576	0,271108538	707,5340576	0,389950782
707,569397	0,249355629	707,5684204	0,560073078	707,55896	0,264700174	707,55896	0,157803506	707,5684204	0,712316871	707,569397	0,466523647	707,569397	0,440838456	707,569397	0,596804917	707,5684204	0,427954525	707,55896	0,339198768	707,55896	0,145805269	707,55896	0,248729661
707,5942993	0,227969259	707,5933228	0,411965996	707,5838623	0,216527417	707,5838623	0,151738003	707,5933228	0,55887419	707,5942993	0,392597288	707,5942993	0,372295558	707,5942993	0,491997123	707,5933228	0,316531509	707,5838623	0,270720392	707,5838623	0,137083381	707,5838623	0,20726876
707,6192017	0,150314376	707,6182251	0,244382009	707,6087646	0,15637593	707,6087646	0,130280763	707,6182251	0,375784606	707,6192017	0,259326547	707,6192017	0,241376266	707,6192017	0,325977623	707,6182251	0,181677237	707,6087646	0,200011522	707,6087646	0,128282562	707,6087646	0,161851645
707,644104	0,116998777	707,6431274	0,20642066	707,633667	0,096141674	707,633667	0,077676199	707,6431274	0,305004925	707,644104	0,192847669	707,644104	0,16463156	707,644104	0,231313333	707,6431274	0,176453918	707,633667	0,120330766	707,633667	0,070359446	707,633667	0,090325944
707,6690063	0,150386602	707,6680298	0,182217181	707,6585693	0,109356545	707,6585693	0,103826828	707,6680298	0,239115104	707,6690063	0,182798937	707,6690063	0,179213136	707,6690063	0,207569286	707,6680298	0,162625089	707,6585693	0,115907259	707,6585693	0,088781871	707,6585693	0,103295535
707,6939087	0,11752715	707,6929321	0,101180993	707,6834717	0,098076411	707,6834717	0,106892288	707,6929321	0,145452216	707,6939087	0,122787319	707,6939087	0,132485747	707,6939087	0,14106825	707,6929321	0,093024097	707,6834717	0,106910266	707,6834717	0,103149429	707,6834717	0,106728867
707,718811	0,088959992	707,7178955	0,107574604	707,708374	0,065461472	707,708374	0,057699319	707,7178955	0,141703352	707,718811	0,093179502	707,718811	0,088070095	707,718811	0,101667695	707,7178955	0,106098942	707,708374	0,066851646	707,708374	0,053649437	707,708374	0,056242801
707,7437134	0,123930275	707,7427979	0,119497247	707,7332764	0,082421899	707,7332764	0,078041188	707,7427979	0,134442836	707,7437134	0,110480785	707,7437134	0,121171474	707,7437134	0,118695259	707,7427979	0,118398763	707,7332764	0,080197379	707,7332764	0,065160722	707,7332764	0,074670456
707,7686157	0,097806714	707,7677002	0,063706368	707,7581787	0,082695872	707,7581787	0,083906308	707,7677002	0,075380258	707,7686157	0,07831385	707,7686157	0,09822005	707,7686157	0,092139788	707,7677002	0,059341863	707,7581787	0,083632678	707,7581787	0,085330397	707,7581787	0,089720048
707,7935181	0,053290065	707,7926025	0,068826959	707,7830811	0,041309468	707,7830811	0,035215169	707,7926025	0,081881799	707,7935181	0,057727139	707,7935181	0,06063069	707,7935181	0,062168323	707,7926025	0,064416707	707,7830811	0,045105398	707,7830811	0,037578464	707,7830811	0,040960748
707,8184204	0,080235489	707,8175049	0,099086545	707,8079834	0,053053912	707,8079834	0,04701646	707,8175049	0,096219562	707,8184204	0,083207004	707,8184204	0,080748037	707,8184204	0,082708545	707,8175049	0,093561828	707,8079834	0,052857716	707,8079834	0,042554084	707,8079834	0,048445981
707,8433228	0,091923185	707,8424072	0,054261718	707,8328857	0,061797321	707,8328857	0,073497176	707,8424072	0,054409701	707,8433228	0,08164335	707,8433228	0,094010651	707,8433228	0,090930142	707,8424072	0,049349323	707,8328857	0,065394796	707,8328857	0,073826671	707,8328857	0,06905131
707,8682251	0,050096437	707,8673096	0,055692956	707,8577881	0,032338873	707,8577881	0,03445125	707,8673096	0,060675859	707,8682251	0,042597175	707,8682251	0,049451243	707,8682251	0,049764406	707,8673096	0,053261053	707,8577881	0,034756381	707,8577881	0,038143776	707,8577881	0,031987298
707,8931274	0,056738194	707,8922119	0,094722539	707,8826904	0,04328936	707,8826904	0,043427069	707,8922119	0,09117125	707,8931274	0,050243977	707,8931274	0,051235415	707,8931274	0,053198382	707,8922119	0,100868553	707,8826904	0,043146733	707,8826904	0,042237863	707,8826904	0,037511215
707,9180298	0,093411006	707,9171143	0,087807901	707,9075928	0,057128932	707,9075928	0,067147367	707,9171143	0,074335642	707,9180298	0,069159441	707,9180298	0,078781448	707,9180298	0,076323487	707,9171143	0,09096396	707,9075928	0,053581666	707,9075928	0,061790429	707,9075928	0,057072736
707,9429321	0,077657998	707,9420166	0,056247547	707,9324951	0,055100415	707,9324951	0,078655757	707,9420166	0,04671583	707,9429321	0,042775452	707,9429321	0,056169681	707,9429321	0,050736204	707,9420166	0,06552586	707,9324951	0,054881927	707,9324951	0,086888447	707,9324951	0,064825378
707,9678345	0,109246552	707,9669189	0,09467411	707,9574585	0,043562714	707,9574585	0,074123494	707,9669189	0,076055333	707,9678345	0,04672933	707,9678345	0,05957377	707,9678345	0,054953989	707,9669189	0,137251005	707,9574585	0,036859211	707,9574585	0,063408144	707,9574585	0,038032752
707,9927368	0,280852288	707,9918213	0,149638101	707,9823608	0,082930103	707,9823608	0,194710016	707,9918213	0,092170492	707,9927368	0,085076012	707,9927368	0,126446202	707,9927368	0,098237313	707,9918213	0,251031071	707,9823608	0,062875859	707,9823608	0,139632836	707,9823608	0,079423606
708,0176392	0,560450494	708,0167236	0,162250564	708,0072632	0,123751171	708,0072632	0,389688641	708,0167236	0,077390574	708,0176392	0,080319315	708,0176392	0,176583886	708,0176392	0,101841427	708,0167236	0,362945527	708,0072632	0,086083151	708,0072632	0,258191526	708,0072632	0,127427071
708,0425415	1,028761029	708,041626	0,292996287	708,0321655	0,175810084	708,0321655	0,601346195	708,041626	0,146444961	708,0425415	0,131575823	708,0425415	0,288931191	708,0425415	0,15447028	708,041626	0,629803658	708,0321655	0,096591353	708,0321655	0,346483916	708,0321655	0,152254745
708,0674438	1,603017211	708,0665283	0,43435353	708,0570679	0,32768929	708,0570679	0,841498137	708,0665283	0,229851916	708,0674438	0,297503561	708,0674438	0,599852622	708,0674438	0,320296317	708,0665283	0,854548991	708,0570679	0,190989122	708,0570679	0,502058208	708,0570679	0,286584318
708,0923462	1,882368922	708,0914307	0,442207783	708,0819702	0,453862578	708,0819702	0,891027749	708,0914307	0,25717172	708,0923462	0,483684778	708,0923462	0,907113731	708,0923462	0,488460213	708,0914307	0,852060795	708,0819702	0,305267483	708,0819702	0,586781025	708,0819702	0,423832089
708,1173096	1,746674776	708,116333	0,457569331	708,1068726	0,475337565	708,1068726	0,710502326	708,116333	0,332743883	708,1173096	0,70900315	708,1173096	1,142972946	708,1173096	0,643073916	708,116333	0,782432556	708,1068726	0,353036702	708,1068726	0,482077926	708,1068726	0,43895629
708,1422119	1,422448039	708,1412354	0,441906899	708,1317749	0,476872236	708,1317749	0,542331219	708,1412354	0,367905438	708,1422119	0,936031461	708,1422119	1,269702077	708,1422119	0,779717147	708,1412354	0,655794799	708,1317749	0,399871439	708,1317749	0,38086319	708,1317749	0,446671635
708,1671143	0,991631866	708,1661377	0,296781659	708,1566772	0,411020517	708,1566772	0,414182335	708,1661377	0,284270763	708,1671143	0,944204032	708,1671143	1,132030964	708,1671143	0,760564506	708,1661377	0,43116045	708,1566772	0,387825638	708,1566772	0,317422658	708,1566772	0,40362218
708,1920166	0,655636787	708,19104	0,228864506	708,1815796	0,276839823	708,1815796	0,247428924	708,19104	0,245746315	708,1920166	0,798689246	708,1920166	0,849520028	708,1920166	0,6141904	708,19104	0,32207647	708,1815796	0,281747758	708,1815796	0,1951942	708,1815796	0,268496454
708,2169189	0,506089866	708,2159424	0,231577784	708,2064819	0,213367924	708,2064819	0,196043491	708,2159424	0,234579429	708,2169189	0,656573653	708,2169189	0,659262419	708,2169189	0,505250096	708,2159424	0,311166883	708,2064819	0,220433518	708,2064819	0,148308083	708,2064819	0,20622696
708,2418213	0,410454184	708,2408447	0,160275862	708,2313843	0,194836065	708,2313843	0,206906736	708,2408447	0,155975997	708,2418213	0,488103777	708,2418213	0,509642243	708,2418213	0,388206959	708,2408447	0,222818106	708,2313843	0,19754982	708,2313843	0,173586294	708,2313843	0,200508446
708,2667236	0,309940875	708,2657471	0,132916361	708,2562866	0,126268625	708,2562866	0,145461008	708,2657471	0,127111122	708,2667236	0,343820602	708,2667236	0,351145864	708,2667236	0,272471607	708,2657471	0,198165059	708,2562866	0,129647955	708,2562866	0,1263109	708,2562866	0,132030725
708,291626	0,326733679	708,2906494	0,201273486	708,281189	0,119109154	708,281189	0,150665626	708,2906494	0,161380649	708,291626	0,307328016	708,291626	0,317285895	708,291626	0,250760019	708,2906494	0,285288453	708,281189	0,109391071	708,281189	0,114692509	708,281189	0,110277519
708,3165283	0,347296327	708,3155518	0,205779701	708,3060913	0,159055084	708,3060913	0,22908631	708,3155518	0,139880344	708,3165283	0,256225705	708,3165283	0,308301389	708,3165283	0,230982482	708,3155518	0,310476094	708,3060913	0,138484687	708,3060913	0,192344025	708,3060913	0,159119338
708,3414307	0,330855876	708,3404541	0,253861785	708,3309937	0,157799244	708,3309937	0,246064976	708,3404541	0,148389965	708,3414307	0,201430514	708,3414307	0,254593313	708,3414307	0,191292599	708,3404541	0,402919918	708,3309937	0,127347797	708,3309937	0,215317726	708,3309937	0,151036739
708,366333	0,435794055	708,3653564	0,46207127	708,355896	0,195981249	708,355896	0,314316571	708,3653564	0,255681604	708,366333	0,235731795	708,366333	0,306165576	708,366333	0,237774432	708,3653564	0,673095763	708,355896	0,141033605	708,355896	0,259001851	708,355896	0,168638468
708,3912354	0,542797506	708,3903198	0,678507507	708,3807983	0,309963971	708,3807983	0,492655665	708,3903198	0,359998226	708,3912354	0,26138562	708,3912354	0,373551726	708,3912354	0,288788766	708,3903198	0,920860171	708,3807983	0,229171634	708,3807983	0,41524592	708,3807983	0,284386158
708,4161377	0,602021575	708,4152222	0,8250615	708,4057007	0,408155024	708,4057007	0,58868432	708,4152222	0,444410384	708,4161377	0,270302773	708,4161377	0,414778143	708,4161377	0,327218086	708,4152222	1,053278208	708,4057007	0,300268441	708,4057007	0,51769048	708,4057007	0,367928177
708,44104	0,657545805	708,4401245	1,040779471	708,430603	0,467379898	708,430603	0,585597098	708,4401245	0,6372329	708,44104	0,322602749	708,44104	0,477534413	708,44104	0,418683887	708,4401245	1,214508176	708,430603	0,352049321	708,430603	0,52221477	708,430603	0,399913877
708,4659424	0,700537801	708,4650269	1,234495521	708,4555054	0,575760543	708,4555054	0,615736604	708,4650269	0,877898753	708,4659424	0,445926398	708,4659424	0,633051217	708,4659424	0,608486772	708,4650269	1,282209754	708,4555054	0,464526147	708,4555054	0,547439635	708,4555054	0,50138849
708,4908447	0,625434577	708,4899292	1,159836411	708,4804077	0,616453111	708,4804077	0,565087199	708,4899292	0,964339316	708,4908447	0,513842344	708,4908447	0,709419429	708,4908447	0,73530066	708,4899292	1,072463274	708,4804077	0,573099256	708,4804077	0,525763929	708,4804077	0,568486452
708,5157471	0,459873706	708,5148315	1,003219247	708,5053101	0,515590668	708,5053101	0,382574886	708,5148315	0,997107863	708,5157471	0,539964378	708,5157471	0,651551068	708,5157471	0,760847747	708,5148315	0,846535325	708,5053101	0,548951805	708,5053101	0,36659348	708,5053101	0,47968778
708,5406494	0,370632768	708,5397339	0,840664029	708,5302124	0,4247078	708,5302124	0,274698406	708,5397339	0,953887641	708,5406494	0,560214579	708,5406494	0,598123431	708,5406494	0,753519297	708,5397339	0,66795516	708,5302124	0,495799929	708,5302124	0,254183173	708,5302124	0,394197226
708,5655518	0,278783947	708,5646362	0,572537243	708,5551758	0,334410757	708,5551758	0,229755968	708,5646362	0,748355389	708,5655518	0,47859782	708,5655518	0,480429769	708,5655518	0,633924901	708,5646362	0,41647315	708,5551758	0,424439043	708,5551758	0,220748216	708,5551758	0,334675491
708,5904541	0,16162616	708,5895386	0,379578382	708,5800781	0,203333393	708,5800781	0,126243547	708,5895386	0,569516063	708,5904541	0,343618006	708,5904541	0,313090652	708,5904541	0,457876414	708,5895386	0,271564573	708,5800781	0,281800896	708,5800781	0,131021976	708,5800781	0,209459886
708,6153564	0,14991343	708,6144409	0,315898418	708,6049805	0,139412165	708,6049805	0,091596663	708,6144409	0,464526325	708,6153564	0,287988067	708,6153564	0,245303124	708,6153564	0,362508386	708,6144409	0,245358139	708,6049805	0,191297844	708,6049805	0,080352567	708,6049805	0,135691732
708,6402588	0,144986033	708,6393433	0,20515044	708,6298828	0,135122091	708,6298828	0,124748953	708,6393433	0,315596551	708,6402588	0,216828078	708,6402588	0,200672701	708,6402588	0,267274261	708,6393433	0,15872018	708,6298828	0,167267099	708,6298828	0,114284642	708,6298828	0,145267591
708,6651611	0,088024177	708,6642456	0,12498711	708,6547852	0,089345291	708,6547852	0,085146293	708,6642456	0,211612985	708,6651611	0,129066914	708,6651611	0,116751797	708,6651611	0,1649912	708,6642456	0,103509419	708,6547852	0,108527556	708,6547852	0,086470023	708,6547852	0,096334584
708,6900635	0,101835959	708,6891479	0,150635034	708,6796875	0,070427082	708,6796875	0,06329149	708,6891479	0,200650364	708,6900635	0,129221559	708,6900635	0,112178899	708,6900635	0,153446034	708,6891479	0,13746728	708,6796875	0,077004388	708,6796875	0,051680155	708,6796875	0,064435877
708,7149658	0,113090225	708,7140503	0,117246859	708,7045898	0,096227176	708,7045898	0,101198576	708,7140503	0,145271689	708,7149658	0,109792151	708,7149658	0,121405557	708,7149658	0,135775596	708,7140503	0,109001778	708,7045898	0,096429102	708,7045898	0,088189743	708,7045898	0,096435614
708,7398682	0,062747233	708,7389526	0,067807563	708,7294922	0,072480865	708,7294922	0,070567697	708,7389526	0,094526224	708,7398682	0,062737539	708,7398682	0,069235444	708,7398682	0,076963134	708,7389526	0,062242288	708,7294922	0,077068307	708,7294922	0,07159698	708,7294922	0,076488718
708,7647705	0,066980563	708,763855	0,094456151	708,7543945	0,048852261	708,7543945	0,038819827	708,763855	0,111520499	708,7647705	0,079147324	708,7647705	0,07274688	708,7647705	0,083258368	708,763855	0,093004756	708,7543945	0,050196361	708,7543945	0,034202207	708,7543945	0,042536166
708,7896729	0,083949745	708,7887573	0,087516598	708,7792969	0,066479824	708,7792969	0,066876307	708,7887573	0,093341298	708,7896729	0,082290962	708,7896729	0,096210398	708,7896729	0,092351988	708,7887573	0,081695281	708,7792969	0,06935636	708,7792969	0,059709888	708,7792969	0,065871656
708,8145752	0,044686109	708,8136597	0,049495317	708,8041992	0,054787025	708,8041992	0,055090196	708,8136597	0,057842564	708,8145752	0,044076473	708,8145752	0,048862223	708,8145752	0,053673364	708,8136597	0,04365648	708,8041992	0,058575407	708,8041992	0,064437278	708,8041992	0,061958697
708,8394775	0,04537021	708,838562	0,075280346	708,8291016	0,036923785	708,8291016	0,02923367	708,838562	0,080143012	708,8394775	0,055425391	708,8394775	0,048532393	708,8394775	0,056920975	708,838562	0,075572655	708,8291016	0,036391549	708,8291016	0,032099027	708,8291016	0,031343073
708,8644409	0,079041556	708,8634644	0,086262777	708,8540039	0,054841012	708,8540039	0,062573925	708,8634644	0,0802828	708,8644409	0,07030309	708,8644409	0,079800002	708,8644409	0,07580635	708,8634644	0,083086483	708,8540039	0,054607712	708,8540039	0,05758496	708,8540039	0,056779865
708,8893433	0,055275574	708,8883667	0,052903447	708,8789063	0,056264061	708,8789063	0,068916254	708,8883667	0,048968937	708,8893433	0,038233407	708,8893433	0,054730207	708,8893433	0,048576415	708,8883667	0,046748582	708,8789063	0,055854525	708,8789063	0,075846486	708,8789063	0,064182922
708,9142456	0,059680082	708,913269	0,083968416	708,9038086	0,037871119	708,9038086	0,043002412	708,913269	0,074961379	708,9142456	0,042641114	708,9142456	0,045754481	708,9142456	0,049890142	708,913269	0,088706918	708,9038086	0,03625533	708,9038086	0,045778632	708,9038086	0,034463063
708,9391479	0,098187655	708,9381714	0,119476534	708,9287109	0,065346569	708,9287109	0,09172143	708,9381714	0,092904359	708,9391479	0,058624785	708,9391479	0,068369664	708,9391479	0,068399563	708,9381714	0,131981492	708,9287109	0,057871889	708,9287109	0,083181031	708,9287109	0,065431677
708,9640503	0,14894633	708,9630737	0,099307179	708,9536133	0,080076918	708,9536133	0,135576174	708,9630737	0,069583401	708,9640503	0,069389142	708,9640503	0,106636882	708,9640503	0,082717806	708,9630737	0,114009507	708,9536133	0,073415652	708,9536133	0,126662999	708,9536133	0,09370213
708,9889526	0,166637495	708,9879761	0,08639624	708,9785156	0,068150982	708,9785156	0,140273437	708,9879761	0,061161738	708,9889526	0,05588742	708,9889526	0,094902799	708,9889526	0,071459569	708,9879761	0,132956117	708,9785156	0,059287906	708,9785156	0,119925052	708,9785156	0,076361626
709,013855	0,357011765	709,0128784	0,174751848	709,003418	0,08376772	709,003418	0,219676539	709,0128784	0,111789137	709,013855	0,098302141	709,013855	0,161017194	709,013855	0,113735251	709,0128784	0,302218437	709,003418	0,058447104	709,003418	0,15015012	709,003418	0,076669887
709,0387573	0,731024861	709,0377808	0,230716124	709,0283203	0,170051724	709,0283203	0,457168669	709,0377808	0,118901044	709,0387573	0,143527523	709,0387573	0,280040652	709,0387573	0,16747129	709,0377808	0,47347489	709,0283203	0,11540094	709,0283203	0,325101376	709,0283203	0,168194279
709,0636597	1,164206028	709,0626831	0,293701828	709,0532227	0,252103418	709,0532227	0,667884111	709,0626831	0,133634731	709,0636597	0,18760702	709,0636597	0,436906248	709,0636597	0,212048858	709,0626831	0,622333467	709,0532227	0,150974676	709,0532227	0,496110976	709,0532227	0,243147716
709,088562	1,570950389	709,0876465	0,434146613	709,078125	0,374411583	709,078125	0,770154119	709,0876465	0,242117599	709,088562	0,374399424	709,088562	0,786346138	709,088562	0,396073997	709,0876465	0,773186743	709,078125	0,212084621	709,078125	0,575403154	709,078125	0,339658618
709,1134644	1,620708823	709,1125488	0,464463383	709,1030273	0,516668975	709,1030273	0,76141721	709,1125488	0,302099973	709,1134644	0,623691082	709,1134644	1,175491452	709,1134644	0,637571394	709,1125488	0,713868976	709,1030273	0,353236347	709,1030273	0,597116709	709,1030273	0,49542889
709,1383667	1,276973367	709,1374512	0,367372155	709,1279297	0,513209879	709,1279297	0,589712143	709,1374512	0,285924435	709,1383667	0,791025281	709,1383667	1,277683854	709,1383667	0,760929883	709,1374512	0,525477886	709,1279297	0,424386621	709,1279297	0,488039941	709,1279297	0,518273592
709,163269	0,945294738	709,1623535	0,334769577	709,1528931	0,409891516	709,1528931	0,393300384	709,1623535	0,308246493	709,163269	0,892596781	709,163269	1,157607913	709,163269	0,791333556	709,1623535	0,449714214	709,1528931	0,389322251	709,1528931	0,317897916	709,1528931	0,41043061
709,1881714	0,734580576	709,1872559	0,282485783	709,1777954	0,34514001	709,1777954	0,323864132	709,1872559	0,269772023	709,1881714	0,834856868	709,1881714	0,976688683	709,1881714	0,719278753	709,1872559	0,361829787	709,1777954	0,352837086	709,1777954	0,265721411	709,1777954	0,353852004
709,2130737	0,520148575	709,2121582	0,182362854	709,2026978	0,259941161	709,2026978	0,252148956	709,2121582	0,19091779	709,2130737	0,634797513	709,2130737	0,720590949	709,2130737	0,536719799	709,2121582	0,24670887	709,2026978	0,277795523	709,2026978	0,226574153	709,2026978	0,277638555
709,2379761	0,404018223	709,2370605	0,199445143	709,2276001	0,181842983	709,2276001	0,181764394	709,2370605	0,195021018	709,2379761	0,494275659	709,2379761	0,530942917	709,2379761	0,410640746	709,2370605	0,259690762	709,2276001	0,187962815	709,2276001	0,151547953	709,2276001	0,180220604
709,2628784	0,397256047	709,2619629	0,214760691	709,2525024	0,184861839	709,2525024	0,205597267	709,2619629	0,18334657	709,2628784	0,42107445	709,2628784	0,466191202	709,2628784	0,36538896	709,2619629	0,27081117	709,2525024	0,175531715	709,2525024	0,171915323	709,2525024	0,182365045
709,2877808	0,318528414	709,2868652	0,165089905	709,2774048	0,173412219	709,2774048	0,20728831	709,2868652	0,136714652	709,2877808	0,313088447	709,2877808	0,370462477	709,2877808	0,280457884	709,2868652	0,224449545	709,2774048	0,163211361	709,2774048	0,195195913	709,2774048	0,18164809
709,3126831	0,298745424	709,3117676	0,220436037	709,3023071	0,141608104	709,3023071	0,17462258	709,3117676	0,174688861	709,3126831	0,254911035	709,3126831	0,292904854	709,3126831	0,235564113	709,3117676	0,319267064	709,3023071	0,124026261	709,3023071	0,150490791	709,3023071	0,130630806
709,3375854	0,432533741	709,3366699	0,33608067	709,3272095	0,181512952	709,3272095	0,266925365	709,3366699	0,21746558	709,3375854	0,2677598	709,3375854	0,334750414	709,3375854	0,261377394	709,3366699	0,537379146	709,3272095	0,151876241	709,3272095	0,215028211	709,3272095	0,165966421
709,3624878	0,625714958	709,3615723	0,48947522	709,3521118	0,236786917	709,3521118	0,424791306	709,3615723	0,240320548	709,3624878	0,249168754	709,3624878	0,364875585	709,3624878	0,268409878	709,3615723	0,844732046	709,3521118	0,18634735	709,3521118	0,354091227	709,3521118	0,227775484
709,3873901	1,009442091	709,3864746	0,875692606	709,3770142	0,307304382	709,3770142	0,5964728	709,3864746	0,428276807	709,3873901	0,282228082	709,3873901	0,492414027	709,3873901	0,34419477	709,3864746	1,379109979	709,3770142	0,209061325	709,3770142	0,491765201	709,3770142	0,272131532
709,4122925	1,441954613	709,411377	1,376304626	709,4019165	0,53332901	709,4019165	0,856167972	709,411377	0,737221003	709,4122925	0,457032889	709,4122925	0,878134251	709,4122925	0,613344371	709,411377	1,860471368	709,4019165	0,358994842	709,4019165	0,701307356	709,4019165	0,455700487
709,4371948	1,581988692	709,4362793	1,685607076	709,4268188	0,765589237	709,4268188	0,985962451	709,4362793	1,04050982	709,4371948	0,638778031	709,4371948	1,216885209	709,4371948	0,884513199	709,4362793	1,96771419	709,4268188	0,586304128	709,4268188	0,856275678	709,4268188	0,686512053
709,4620972	1,410363913	709,4611816	1,82507956	709,4517212	0,856576264	709,4517212	0,895738482	709,4611816	1,287563682	709,4620972	0,819517314	709,4620972	1,410121322	709,4620972	1,130534768	709,4611816	1,948090792	709,4517212	0,748076797	709,4517212	0,812929153	709,4517212	0,774954319
709,4869995	1,153790116	709,486084	1,910059333	709,4766235	0,88289988	709,4766235	0,853551924	709,486084	1,488611937	709,4869995	1,084993124	709,4869995	1,525911212	709,4869995	1,425049186	709,486084	1,935325146	709,4766235	0,84456706	709,4766235	0,791189909	709,4766235	0,802385449
709,5119019	0,955566347	709,5109863	1,923076034	709,5015259	0,907176018	709,5015259	0,867023706	709,5109863	1,604516149	709,5119019	1,200773358	709,5119019	1,440924287	709,5119019	1,519168258	709,5109863	1,850408673	709,5015259	0,890901923	709,5015259	0,828816831	709,5015259	0,828579903
709,5368042	0,72411716	709,5358887	1,792683601	709,5264282	0,904204369	709,5264282	0,807069898	709,5358887	1,579598427	709,5368042	1,050929666	709,5368042	1,157912135	709,5368042	1,361305118	709,5358887	1,595637679	709,5264282	0,874960482	709,5264282	0,814077973	709,5264282	0,815803766
709,5617065	0,568899035	709,560791	1,610142827	709,5513306	0,853252769	709,5513306	0,603227973	709,560791	1,566070795	709,5617065	0,903608084	709,5617065	0,917826951	709,5617065	1,179402351	709,560791	1,313976765	709,5513306	0,821049035	709,5513306	0,620270073	709,5513306	0,73824966
709,5866699	0,476056665	709,5856934	1,287375212	709,5762329	0,757639408	709,5762329	0,454568446	709,5856934	1,420077085	709,5866699	0,79471314	709,5866699	0,784014702	709,5866699	1,038176417	709,5856934	0,970873773	709,5762329	0,792635918	709,5762329	0,461794287	709,5762329	0,662136793
709,6115723	0,329925358	709,6105957	0,87017101	709,6011353	0,557946146	709,6011353	0,315940768	709,6105957	1,120038986	709,6115723	0,629285693	709,6115723	0,573495388	709,6115723	0,817351222	709,6105957	0,61235714	709,6011353	0,664552152	709,6011353	0,335029244	709,6011353	0,51436764
709,6364746	0,225966662	709,635498	0,626393437	709,6260376	0,350104809	709,6260376	0,182632029	709,635498	0,881743908	709,6364746	0,484475911	709,6364746	0,405724347	709,6364746	0,61135596	709,635498	0,445358336	709,6260376	0,454464734	709,6260376	0,188891143	709,6260376	0,31994009
709,661377	0,229592189	709,6604004	0,472982287	709,6509399	0,261033684	709,6509399	0,171159849	709,6604004	0,667706788	709,661377	0,398531109	709,661377	0,350396693	709,661377	0,490488201	709,6604004	0,349839985	709,6509399	0,336868346	709,6509399	0,154881254	709,6509399	0,242971808
709,6862793	0,17189765	709,6853027	0,287555665	709,6758423	0,199508026	709,6758423	0,162373438	709,6853027	0,442213029	709,6862793	0,275513619	709,6862793	0,262990475	709,6862793	0,345642477	709,6853027	0,207822561	709,6758423	0,248988882	709,6758423	0,155803263	709,6758423	0,201245919
709,7111816	0,121616714	709,7102051	0,22717692	709,7007446	0,118683897	709,7007446	0,093518645	709,7102051	0,345419705	709,7111816	0,190078229	709,7111816	0,169412971	709,7111816	0,232871652	709,7102051	0,182885811	709,7007446	0,150761545	709,7007446	0,088080093	709,7007446	0,116289325
709,736084	0,148668155	709,7351074	0,220334888	709,725647	0,121500917	709,725647	0,098164067	709,7351074	0,288049281	709,736084	0,188648641	709,736084	0,175438002	709,736084	0,212494105	709,7351074	0,194137976	709,725647	0,133675247	709,725647	0,088085115	709,725647	0,110862412
709,7609863	0,132614106	709,7600098	0,131194606	709,7506104	0,122722223	709,7506104	0,11286369	709,7600098	0,181868464	709,7609863	0,137992665	709,7609863	0,155852363	709,7609863	0,163945749	709,7600098	0,111459546	709,7506104	0,131071001	709,7506104	0,111618012	709,7506104	0,125056505
709,7858887	0,079422586	709,7849731	0,111817785	709,7755127	0,067715541	709,7755127	0,054332186	709,7849731	0,151671037	709,7858887	0,098697998	709,7858887	0,094154656	709,7858887	0,110740393	709,7849731	0,098784417	709,7755127	0,07944113	709,7755127	0,058837131	709,7755127	0,067812368
709,810791	0,100404888	709,8098755	0,145640671	709,800415	0,069890499	709,800415	0,05724011	709,8098755	0,162310585	709,810791	0,117026165	709,810791	0,111088261	709,810791	0,126894906	709,8098755	0,135356218	709,800415	0,072055914	709,800415	0,051898155	709,800415	0,060848609
709,8356934	0,09683273	709,8347778	0,095219508	709,8253174	0,088619635	709,8253174	0,089765705	709,8347778	0,104962438	709,8356934	0,096720055	709,8356934	0,111962207	709,8356934	0,109281458	709,8347778	0,085407659	709,8253174	0,087468624	709,8253174	0,091475084	709,8253174	0,09061452
709,8605957	0,056563605	709,8596802	0,073151872	709,8502197	0,051943187	709,8502197	0,04969307	709,8596802	0,089141436	709,8605957	0,059416793	709,8605957	0,063429579	709,8605957	0,073851295	709,8596802	0,071268544	709,8502197	0,051486116	709,8502197	0,05931868	709,8502197	0,049382128
709,885498	0,081376553	709,8845825	0,12057139	709,8751221	0,049992114	709,8751221	0,048403189	709,8845825	0,119397528	709,885498	0,083853997	709,885498	0,083264932	709,885498	0,091286972	709,8845825	0,122788601	709,8751221	0,047065213	709,8751221	0,043948554	709,8751221	0,042518109
709,9104004	0,107972011	709,9094849	0,098188497	709,9000244	0,074314766	709,9000244	0,09442734	709,9094849	0,093664214	709,9104004	0,076695591	709,9104004	0,099168025	709,9104004	0,091153763	709,9094849	0,100244932	709,9000244	0,073947072	709,9000244	0,093023747	709,9000244	0,080234669
709,9353027	0,088060237	709,9343872	0,079501465	709,9249268	0,057381637	709,9249268	0,083020858	709,9343872	0,072330527	709,9353027	0,061790194	709,9353027	0,078348607	709,9353027	0,074545108	709,9343872	0,086723395	709,9249268	0,05606474	709,9249268	0,081445865	709,9249268	0,06270659
709,9602051	0,091803953	709,9592896	0,139778063	709,9498291	0,057962827	709,9498291	0,092292361	709,9592896	0,113127917	709,9602051	0,060691535	709,9602051	0,065704733	709,9602051	0,067343764	709,9592896	0,161844507	709,9498291	0,047780447	709,9498291	0,079418883	709,9498291	0,051787775
709,9851074	0,175130174	709,9841919	0,158018485	709,9747314	0,103729174	709,9747314	0,174099818	709,9841919	0,122461304	709,9851074	0,099717557	709,9851074	0,128068477	709,9851074	0,1117016	709,9841919	0,190453649	709,9747314	0,085134245	709,9747314	0,143011704	709,9747314	0,100588061
710,0100098	0,259303689	710,0090942	0,116935849	709,9996338	0,11387042	709,9996338	0,223983184	710,0090942	0,082848944	710,0100098	0,091243796	710,0100098	0,142246902	710,0100098	0,107184336	710,0090942	0,176579863	709,9996338	0,093574822	709,9996338	0,188569739	709,9996338	0,124067917
710,0349121	0,399933457	710,0339966	0,169931114	710,0245361	0,105201572	710,0245361	0,262651652	710,0339966	0,114714533	710,0349121	0,091036327	710,0349121	0,152800962	710,0349121	0,109288514	710,0339966	0,286337137	710,0245361	0,078095868	710,0245361	0,196899667	710,0245361	0,107558735
710,0598145	0,680040836	710,0588989	0,262899488	710,0494385	0,180676132	710,0494385	0,390373826	710,0588989	0,164809644	710,0598145	0,165738642	710,0598145	0,30369541	710,0598145	0,188858226	710,0588989	0,424304873	710,0494385	0,122607753	710,0494385	0,281541884	710,0494385	0,169478819
710,0847168	0,863062322	710,0838013	0,252236515	710,0743408	0,258408993	710,0743408	0,487758458	710,0838013	0,151217401	710,0847168	0,238288298	710,0847168	0,467484146	710,0847168	0,266426206	710,0838013	0,412826627	710,0743408	0,184829772	710,0743408	0,374717981	710,0743408	0,25854829
710,1096191	0,824214935	710,1087036	0,270417184	710,0992432	0,266902506	710,0992432	0,413963467	710,1087036	0,190562829	710,1096191	0,323272169	710,1096191	0,585560083	710,1096191	0,340975106	710,1087036	0,415089577	710,0992432	0,197895482	710,0992432	0,329304695	710,0992432	0,262294263
710,1345215	0,753204703	710,133606	0,315912753	710,1241455	0,293864727	710,1241455	0,365777224	710,133606	0,246632963	710,1345215	0,453836232	710,1345215	0,699983418	710,1345215	0,454097241	710,133606	0,446902722	710,1241455	0,240577608	710,1241455	0,290346295	710,1241455	0,286611199
710,1594238	0,648953915	710,1585083	0,250500888	710,1490479	0,298475832	710,1490479	0,362528563	710,1585083	0,199802086	710,1594238	0,489622951	710,1594238	0,67814827	710,1594238	0,464105397	710,1585083	0,381112069	710,1490479	0,272004098	710,1490479	0,311164409	710,1490479	0,303963602
710,1843262	0,51501298	710,1834106	0,2252547	710,1739502	0,235131264	710,1739502	0,266684085	710,1834106	0,184279248	710,1843262	0,426651418	710,1843262	0,543249846	710,1843262	0,391002029	710,1834106	0,348518044	710,1739502	0,219263062	710,1739502	0,242795706	710,1739502	0,236076862
710,2092285	0,460831821	710,208313	0,270860434	710,1988525	0,214743137	710,1988525	0,208882555	710,208313	0,220800325	710,2092285	0,397623926	710,2092285	0,510435998	710,2092285	0,368221521	710,208313	0,366205156	710,1988525	0,192739338	710,1988525	0,185229555	710,1988525	0,202698767
710,2341309	0,381477684	710,2332153	0,218947813	710,2237549	0,211122006	710,2237549	0,222512066	710,2332153	0,183750585	710,2341309	0,336137861	710,2341309	0,471092433	710,2341309	0,326639682	710,2332153	0,272830635	710,2237549	0,205454588	710,2237549	0,202709839	710,2237549	0,222828493
710,2590332	0,272485524	710,2581177	0,163040817	710,2486572	0,160224482	710,2486572	0,168084085	710,2581177	0,152815059	710,2590332	0,251831979	710,2590332	0,343319088	710,2590332	0,243257761	710,2581177	0,210862264	710,2486572	0,15966849	710,2486572	0,158223167	710,2486572	0,164402694
710,2839355	0,260194242	710,28302	0,209429353	710,2735596	0,132139698	710,2735596	0,137892365	710,28302	0,184505641	710,2839355	0,247751534	710,2839355	0,308936894	710,2839355	0,236383066	710,28302	0,260355294	710,2735596	0,126527607	710,2735596	0,117418967	710,2735596	0,122356057
710,3088379	0,273127943	710,3079224	0,200117305	710,2984619	0,158727437	710,2984619	0,197879493	710,3079224	0,161799446	710,3088379	0,221060053	710,3088379	0,288058341	710,3088379	0,224029109	710,3079224	0,259673208	710,2984619	0,147623241	710,2984619	0,167237312	710,2984619	0,159477398
710,3338013	0,242433548	710,3328247	0,201551631	710,3233643	0,148420468	710,3233643	0,206913874	710,3328247	0,142290667	710,3338013	0,157180011	710,3338013	0,213125542	710,3338013	0,165481508	710,3328247	0,308661252	710,3233643	0,134714544	710,3233643	0,185629621	710,3233643	0,149558097
710,3587036	0,354729652	710,3577271	0,377764553	710,3483276	0,155567005	710,3483276	0,254014522	710,3577271	0,222582772	710,3587036	0,181668624	710,3587036	0,238228858	710,3587036	0,195919454	710,3577271	0,581124723	710,3483276	0,119630732	710,3483276	0,205739304	710,3483276	0,137360021
710,383606	0,576552689	710,3826294	0,619171739	710,37323	0,260061204	710,37323	0,446759701	710,3826294	0,313577205	710,383606	0,219090298	710,383606	0,351159096	710,383606	0,264474064	710,3826294	0,936197281	710,37323	0,187336817	710,37323	0,369031698	710,37323	0,233403549
710,4085083	0,791662991	710,4075317	0,928167999	710,3981323	0,375289708	710,3981323	0,64703387	710,4075317	0,462873191	710,4085083	0,241096154	710,4085083	0,465975404	710,4085083	0,343879819	710,4075317	1,332301974	710,3981323	0,265807986	710,3981323	0,562262833	710,3981323	0,341875136
710,4334106	0,981432676	710,4324341	1,407946944	710,4230347	0,548366845	710,4230347	0,858722746	710,4324341	0,789547503	710,4334106	0,342891544	710,4334106	0,638473213	710,4334106	0,493867159	710,4324341	1,870217562	710,4230347	0,384625345	710,4230347	0,753459156	710,4230347	0,473039538
710,458313	1,206613421	710,4573364	1,845128417	710,447937	0,830800056	710,447937	1,18354845	710,4573364	1,150068521	710,458313	0,500266373	710,458313	0,884854794	710,458313	0,723634601	710,4573364	2,28922534	710,447937	0,630375266	710,447937	1,068051219	710,447937	0,734187603
710,4832153	1,453365684	710,4822998	2,043168545	710,4728394	1,046242714	710,4728394	1,369269371	710,4822998	1,381273389	710,4832153	0,703364432	710,4832153	1,184581637	710,4832153	1,032530069	710,4822998	2,389469624	710,4728394	0,855186701	710,4728394	1,268456221	710,4728394	0,946919024
710,5081177	1,436118603	710,5072021	2,135400295	710,4977417	1,202607155	710,4977417	1,31735909	710,5072021	1,624701977	710,5081177	0,867116928	710,5081177	1,392633438	710,5081177	1,311522722	710,5072021	2,311513424	710,4977417	1,048509836	710,4977417	1,254249692	710,4977417	1,07348752
710,53302	1,238587141	710,5321045	2,072981596	710,522644	1,323744774	710,522644	1,080196977	710,5321045	1,852314591	710,53302	1,070293188	710,53302	1,56350553	710,53302	1,593209386	710,5321045	2,001998901	710,522644	1,314356923	710,522644	1,051349759	710,522644	1,175040603
710,5579224	0,910922647	710,5570068	1,688830853	710,5475464	1,223462343	710,5475464	0,802734494	710,5570068	1,772672296	710,5579224	1,125145555	710,5579224	1,478992701	710,5579224	1,648205042	710,5570068	1,446495056	710,5475464	1,411746025	710,5475464	0,804583788	710,5475464	1,121866584
710,5828247	0,562390029	710,5819092	1,224603653	710,5724487	0,894695342	710,5724487	0,493945807	710,5819092	1,509680986	710,5828247	0,9974581	710,5828247	1,138634324	710,5828247	1,435422778	710,5819092	0,956757724	710,5724487	1,187948346	710,5724487	0,516762197	710,5724487	0,837604523
710,6077271	0,397250712	710,6068115	0,906518638	710,5973511	0,587009847	710,5973511	0,292687535	710,6068115	1,235165834	710,6077271	0,834893763	710,6077271	0,840100884	710,6077271	1,152439833	710,6068115	0,70203954	710,5973511	0,855374098	710,5973511	0,299050808	710,5973511	0,554211259
710,6326294	0,314330518	710,6317139	0,620087624	710,6222534	0,407913685	710,6222534	0,246507585	710,6317139	0,904815495	710,6326294	0,630508125	710,6326294	0,617497265	710,6326294	0,852247655	710,6317139	0,473295033	710,6222534	0,60844171	710,6222534	0,247267783	710,6222534	0,406207144
710,6575317	0,217355102	710,6566162	0,395876348	710,6471558	0,263071835	710,6471558	0,188461587	710,6566162	0,628188133	710,6575317	0,41255495	710,6575317	0,392943293	710,6575317	0,554993331	710,6566162	0,308644176	710,6471558	0,398993134	710,6471558	0,19067125	710,6471558	0,267626762
710,6824341	0,224701166	710,6815186	0,337992132	710,6720581	0,179143831	710,6720581	0,139968753	710,6815186	0,492386788	710,6824341	0,320045203	710,6824341	0,315310448	710,6824341	0,412954777	710,6815186	0,303236097	710,6720581	0,249135554	710,6720581	0,127131194	710,6720581	0,16564703
710,7073364	0,249929205	710,7064209	0,273435295	710,6969604	0,182312369	710,6969604	0,167866796	710,7064209	0,367229551	710,7073364	0,263173342	710,7073364	0,295902669	710,7073364	0,3368797	710,7064209	0,251950711	710,6969604	0,21015361	710,6969604	0,147122666	710,6969604	0,173999131
710,7322388	0,163535759	710,7313232	0,17722398	710,7218628	0,151145324	710,7218628	0,132989466	710,7313232	0,253033102	710,7322388	0,176640496	710,7322388	0,216980159	710,7322388	0,236143813	710,7313232	0,160140023	710,7218628	0,170811504	710,7218628	0,134486422	710,7218628	0,151593223
710,7571411	0,131719157	710,7562256	0,184067741	710,7467651	0,104693405	710,7467651	0,074125275	710,7562256	0,238646314	710,7571411	0,164649859	710,7571411	0,179291606	710,7571411	0,20149079	710,7562256	0,176597282	710,7467651	0,119125769	710,7467651	0,071734235	710,7467651	0,091147266
710,7820435	0,142151222	710,7811279	0,170074075	710,7716675	0,112708665	710,7716675	0,093560286	710,7811279	0,198023796	710,7820435	0,169437647	710,7820435	0,193731904	710,7820435	0,197965905	710,7811279	0,156612232	710,7716675	0,124204002	710,7716675	0,089296497	710,7716675	0,108723089
710,8069458	0,090646006	710,8060303	0,099304922	710,7965698	0,089300439	710,7965698	0,085816637	710,8060303	0,129482538	710,8069458	0,104216874	710,8069458	0,123293057	710,8069458	0,126391232	710,8060303	0,090562917	710,7965698	0,104837067	710,7965698	0,093505882	710,7965698	0,099090807
710,8318481	0,071612224	710,8309326	0,119704627	710,8214722	0,054543439	710,8214722	0,047541413	710,8309326	0,142273098	710,8318481	0,084175065	710,8318481	0,087242506	710,8318481	0,102028206	710,8309326	0,118496247	710,8214722	0,064310625	710,8214722	0,049521133	710,8214722	0,051029492
710,8567505	0,10903848	710,855835	0,137165427	710,8463745	0,074085042	710,8463745	0,079137273	710,855835	0,136236906	710,8567505	0,103138998	710,8567505	0,113119937	710,8567505	0,124780469	710,855835	0,13141644	710,8463745	0,079788581	710,8463745	0,071358286	710,8463745	0,073056273
710,8816528	0,083457179	710,8807373	0,088292569	710,8712769	0,073464662	710,8712769	0,089825019	710,8807373	0,08946529	710,8816528	0,067684978	710,8816528	0,089339502	710,8816528	0,094345517	710,8807373	0,085456125	710,8712769	0,078540638	710,8712769	0,095787115	710,8712769	0,082240701
710,9065552	0,066227801	710,9056396	0,112831771	710,8961792	0,050966132	710,8961792	0,058687165	710,9056396	0,116862081	710,9065552	0,061512545	710,9065552	0,066326044	710,9065552	0,070500225	710,9056396	0,12092717	710,8961792	0,052445736	710,8961792	0,058076967	710,8961792	0,047881845
710,9314575	0,114779048	710,930542	0,144095153	710,9210815	0,080132514	710,9210815	0,093026854	710,930542	0,130157292	710,9314575	0,096284851	710,9314575	0,105512448	710,9314575	0,107512735	710,930542	0,150254175	710,9210815	0,075302452	710,9210815	0,083554007	710,9210815	0,074760661
710,9563599	0,122384712	710,9554443	0,094009534	710,9460449	0,091825962	710,9460449	0,126125962	710,9554443	0,083660975	710,9563599	0,08664979	710,9563599	0,113808788	710,9563599	0,104893886	710,9554443	0,100243345	710,9460449	0,089072146	710,9460449	0,121459462	710,9460449	0,100494683
710,9812622	0,097027168	710,9803467	0,107628584	710,9709473	0,07655713	710,9709473	0,11017856	710,9803467	0,10311386	710,9812622	0,054325897	710,9812622	0,074510932	710,9812622	0,076508678	710,9803467	0,121058866	710,9709473	0,072333306	710,9709473	0,103846624	710,9709473	0,077006444
711,0061646	0,14873679	711,005249	0,14501515	710,9958496	0,073016204	710,9958496	0,120827198	711,005249	0,122570522	711,0061646	0,08317402	711,0061646	0,101084583	711,0061646	0,097177915	711,005249	0,178832218	710,9958496	0,064078927	710,9958496	0,096787319	710,9958496	0,068468407
711,0310669	0,293683887	711,0301514	0,165277526	711,020752	0,123315781	711,020752	0,22756958	711,0301514	0,124155879	711,0310669	0,108398303	711,0310669	0,156958863	711,0310669	0,127778828	711,0301514	0,236453772	711,020752	0,10016413	711,020752	0,1752799	711,020752	0,11935661
711,0560303	0,407725245	711,0550537	0,148279488	711,0456543	0,1521734	711,0456543	0,309153169	711,0550537	0,103059739	711,0560303	0,091825724	711,0560303	0,174891397	711,0560303	0,113242656	711,0550537	0,257474869	711,0456543	0,115587071	711,0456543	0,244322404	711,0456543	0,151681617
711,0809326	0,57684505	711,0799561	0,226659641	711,0705566	0,178131938	711,0705566	0,350687712	711,0799561	0,15636307	711,0809326	0,155844569	711,0809326	0,283835322	711,0809326	0,169280723	711,0799561	0,356128842	711,0705566	0,118197352	711,0705566	0,259031206	711,0705566	0,158882424
711,105835	0,689191997	711,1048584	0,262284905	711,095459	0,261764348	711,095459	0,417606115	711,1048584	0,179832295	711,105835	0,258161217	711,105835	0,455856472	711,105835	0,267221123	711,1048584	0,376462787	711,095459	0,18630074	711,095459	0,319316864	711,095459	0,250558257
711,1307373	0,597093821	711,1297607	0,206310362	711,1203613	0,290100545	711,1203613	0,386536956	711,1297607	0,155889496	711,1307373	0,298293412	711,1307373	0,497868598	711,1307373	0,295061886	711,1297607	0,294704407	711,1203613	0,226277635	711,1203613	0,315061152	711,1203613	0,291543752
711,1556396	0,503597558	711,1546631	0,220573321	711,1452637	0,251416624	711,1452637	0,282381207	711,1546631	0,187197387	711,1556396	0,355038404	711,1556396	0,492679566	711,1556396	0,323940009	711,1546631	0,306506127	711,1452637	0,215089858	711,1452637	0,225603312	711,1452637	0,241001919
711,180542	0,47487694	711,1796265	0,225264609	711,170166	0,25786972	711,170166	0,264541477	711,1796265	0,19028236	711,180542	0,390771329	711,180542	0,497712046	711,180542	0,35588336	711,1796265	0,292276114	711,170166	0,234571114	711,170166	0,216177449	711,170166	0,249250337
711,2054443	0,374640554	711,2045288	0,148842186	711,1950684	0,224074379	711,1950684	0,219667375	711,2045288	0,137255341	711,2054443	0,322857022	711,2054443	0,410589874	711,2054443	0,287497401	711,2045288	0,196140647	711,1950684	0,214609817	711,1950684	0,200836152	711,1950684	0,22850059
711,2303467	0,266433507	711,2294312	0,157449082	711,2199707	0,151633486	711,2199707	0,142095074	711,2294312	0,154555857	711,2303467	0,267912686	711,2303467	0,317379475	711,2303467	0,235705152	711,2294312	0,202284828	711,2199707	0,154093966	711,2199707	0,124370694	711,2199707	0,147127479
711,255249	0,268476427	711,2543335	0,177215993	711,244873	0,154586852	711,244873	0,154306099	711,2543335	0,160237759	711,255249	0,266721636	711,255249	0,316219687	711,255249	0,238957033	711,2543335	0,207674146	711,244873	0,151212484	711,244873	0,13188161	711,244873	0,148655608
711,2801514	0,221151099	711,2792358	0,118244059	711,2697754	0,146861866	711,2697754	0,16863662	711,2792358	0,105626442	711,2801514	0,203489006	711,2801514	0,253597528	711,2801514	0,196288779	711,2792358	0,14640069	711,2697754	0,142633945	711,2697754	0,159487665	711,2697754	0,155386195
711,3050537	0,170483038	711,3041382	0,151199892	711,2946777	0,106334142	711,2946777	0,130437329	711,3041382	0,125238627	711,3050537	0,153217167	711,3050537	0,179754838	711,3050537	0,150303021	711,3041382	0,204663157	711,2946777	0,100365147	711,2946777	0,11616917	711,2946777	0,103159778
711,3299561	0,236473918	711,3290405	0,239046216	711,3195801	0,140673712	711,3195801	0,190463543	711,3290405	0,166289747	711,3299561	0,172696069	711,3299561	0,206651017	711,3299561	0,174939483	711,3290405	0,335229427	711,3195801	0,118171409	711,3195801	0,159685776	711,3195801	0,127532318
711,3548584	0,291654468	711,3539429	0,283679307	711,3444824	0,191616237	711,3444824	0,292270541	711,3539429	0,158068717	711,3548584	0,156179056	711,3548584	0,228035718	711,3548584	0,17725417	711,3539429	0,426031977	711,3444824	0,154780477	711,3444824	0,257268161	711,3444824	0,184426874
711,3797607	0,35812664	711,3788452	0,465433359	711,3693848	0,213067695	711,3693848	0,357513398	711,3788452	0,246851578	711,3797607	0,148231477	711,3797607	0,227138728	711,3797607	0,17835626	711,3788452	0,673764944	711,3693848	0,156982079	711,3693848	0,309789836	711,3693848	0,189298168
711,4046631	0,543650806	711,4037476	0,763861001	711,3942871	0,328326821	711,3942871	0,523815989	711,4037476	0,424505204	711,4046631	0,22801879	711,4046631	0,360163391	711,4046631	0,293385357	711,4037476	1,001287937	711,3942871	0,232402444	711,3942871	0,435758114	711,3942871	0,285454899
711,4295654	0,663721681	711,4286499	0,966936946	711,4191895	0,490922987	711,4191895	0,684707344	711,4286499	0,570192218	711,4295654	0,289982021	711,4295654	0,480828673	711,4295654	0,396561086	711,4286499	1,178526163	711,4191895	0,368204415	711,4191895	0,604622245	711,4191895	0,447843015
711,4544678	0,677931368	711,4535522	1,154523849	711,4440918	0,581621349	711,4440918	0,715799868	711,4535522	0,77628392	711,4544678	0,322212815	711,4544678	0,535745263	711,4544678	0,476418346	711,4535522	1,321543932	711,4440918	0,462614626	711,4440918	0,644892156	711,4440918	0,525560915
711,4793701	0,730773866	711,4784546	1,315470338	711,4689941	0,655097365	711,4689941	0,733402312	711,4784546	0,973800242	711,4793701	0,43542996	711,4793701	0,654316247	711,4793701	0,640812337	711,4784546	1,424048901	711,4689941	0,550157666	711,4689941	0,658664107	711,4689941	0,575576007
711,5042725	0,790330172	711,5033569	1,330731273	711,4938965	0,743808925	711,4938965	0,755941153	711,5033569	1,068307757	711,5042725	0,573204041	711,5042725	0,798436463	711,5042725	0,824722886	711,5033569	1,356368065	711,4938965	0,669018328	711,4938965	0,684558809	711,4938965	0,670925677
711,5291748	0,662246823	711,5282593	1,1706146	711,5187988	0,755192518	711,5187988	0,634448171	711,5282593	1,086889505	711,5291748	0,609764218	711,5291748	0,837319613	711,5291748	0,900633812	711,5282593	1,068398237	711,5187988	0,759051621	711,5187988	0,611620426	711,5187988	0,703697801
711,5540771	0,464297891	711,5531616	0,977781355	711,5437622	0,628322065	711,5437622	0,406411558	711,5531616	1,070949197	711,5540771	0,614585996	711,5540771	0,752249956	711,5540771	0,897273719	711,5531616	0,818158746	711,5437622	0,726536989	711,5437622	0,400223613	711,5437622	0,5834499
711,5789795	0,368015021	711,578064	0,771947742	711,5686646	0,502541065	711,5686646	0,299298078	711,578064	0,938702762	711,5789795	0,607588947	711,5789795	0,663570702	711,5789795	0,845024526	711,578064	0,607827604	711,5686646	0,644370198	711,5686646	0,287846714	711,5686646	0,474355102
711,6038818	0,247970596	711,6029663	0,494349837	711,5935669	0,356426984	711,5935669	0,229058415	711,6029663	0,701266348	711,6038818	0,480221897	711,6038818	0,491304606	711,6038818	0,659136653	711,6029663	0,362837553	711,5935669	0,498097211	711,5935669	0,225039274	711,5935669	0,360446513
711,6287842	0,153514028	711,6278687	0,356906742	711,6184692	0,207141981	711,6184692	0,1203399	711,6278687	0,544266343	711,6287842	0,342443824	711,6287842	0,316544622	711,6287842	0,462451518	711,6278687	0,271460861	711,6184692	0,314538419	711,6184692	0,122942202	711,6184692	0,206644058
711,6536865	0,173905984	711,652771	0,299919218	711,6433716	0,168519184	711,6433716	0,12544015	711,652771	0,426481605	711,6536865	0,283512414	711,6536865	0,268009692	711,6536865	0,366340369	711,652771	0,249638632	711,6433716	0,230570093	711,6433716	0,111521721	711,6433716	0,163013116
711,6785889	0,165154308	711,6776733	0,182846397	711,6682739	0,152741402	711,6682739	0,152967751	711,6776733	0,276280791	711,6785889	0,200776577	711,6785889	0,218108311	711,6785889	0,26501897	711,6776733	0,154134855	711,6682739	0,186471492	711,6682739	0,138140559	711,6682739	0,16174385
711,7034912	0,118110582	711,7025757	0,149378642	711,6931763	0,099956207	711,6931763	0,094024926	711,7025757	0,219739139	711,7034912	0,134252831	711,7034912	0,136515617	711,7034912	0,176355347	711,7025757	0,136928365	711,6931763	0,118354127	711,6931763	0,087205388	711,6931763	0,096555255
711,7283936	0,138156906	711,727478	0,17958571	711,7180786	0,103941426	711,7180786	0,087534502	711,727478	0,212078273	711,7283936	0,147623628	711,7283936	0,158936083	711,7283936	0,173442453	711,727478	0,170823485	711,7180786	0,109090768	711,7180786	0,072958834	711,7180786	0,091398694
711,7532959	0,126342878	711,7523804	0,115173221	711,742981	0,116889417	711,742981	0,115126498	711,7523804	0,137642488	711,7532959	0,123613305	711,7532959	0,157560498	711,7532959	0,148922667	711,7523804	0,106539272	711,742981	0,123044625	711,742981	0,106113307	711,742981	0,121022329
711,7781982	0,076184705	711,7772827	0,090615958	711,7678833	0,06726779	711,7678833	0,060538486	711,7772827	0,113314763	711,7781982	0,08220192	711,7781982	0,09207499	711,7781982	0,10043408	711,7772827	0,085472576	711,7678833	0,07954137	711,7678833	0,061601605	711,7678833	0,069738612
711,8031616	0,08478713	711,8021851	0,130688205	711,7927856	0,060882561	711,7927856	0,050028875	711,8021851	0,142125353	711,8031616	0,10584075	711,8031616	0,101427265	711,8031616	0,1137973	711,8021851	0,1250007	711,7927856	0,063891828	711,7927856	0,044057604	711,7927856	0,054381702
711,828064	0,091690131	711,8270874	0,102023676	711,817688	0,083045475	711,817688	0,086623788	711,8270874	0,104434587	711,828064	0,089979522	711,828064	0,106977664	711,828064	0,104720674	711,8270874	0,091676794	711,817688	0,084491767	711,817688	0,081226617	711,817688	0,084106714
711,8529663	0,055644803	711,8520508	0,073769227	711,8425903	0,055875678	711,8425903	0,057001129	711,8520508	0,081205487	711,8529663	0,052921813	711,8529663	0,064638101	711,8529663	0,068869151	711,8520508	0,067036413	711,8425903	0,060900629	711,8425903	0,062395278	711,8425903	0,059424032
711,8778687	0,083033487	711,8769531	0,118988261	711,8674927	0,04721076	711,8674927	0,046355877	711,8769531	0,117581449	711,8778687	0,078187898	711,8778687	0,079583578	711,8778687	0,087769374	711,8769531	0,121331662	711,8674927	0,047667678	711,8674927	0,042661961	711,8674927	0,042499162
711,902771	0,106962867	711,9018555	0,106846906	711,892395	0,076511458	711,892395	0,091669366	711,9018555	0,098319165	711,902771	0,0919604	711,902771	0,101267919	711,902771	0,104429439	711,9018555	0,105114453	711,892395	0,076640412	711,892395	0,089338012	711,892395	0,082130507
711,9276733	0,087277815	711,9267578	0,072823167	711,9172974	0,062948436	711,9172974	0,081271015	711,9267578	0,073341921	711,9276733	0,06535013	711,9276733	0,087366812	711,9276733	0,083715811	711,9267578	0,076412894	711,9172974	0,065510467	711,9172974	0,084941246	711,9172974	0,069488317
711,9525757	0,071363665	711,9516602	0,107953459	711,9421997	0,047440529	711,9421997	0,061610579	711,9516602	0,104330972	711,9525757	0,057070501	711,9525757	0,060623057	711,9525757	0,068643749	711,9516602	0,122238562	711,9421997	0,047380064	711,9421997	0,057188824	711,9421997	0,043980785
711,977478	0,122780547	711,9765625	0,133049622	711,9671021	0,071516104	711,9671021	0,104060866	711,9765625	0,115113683	711,977478	0,09227363	711,977478	0,100360699	711,977478	0,095899269	711,9765625	0,154749483	711,9671021	0,065084688	711,9671021	0,080328174	711,9671021	0,070023052
712,0023804	0,169984609	712,0014648	0,093115054	711,9920044	0,101752058	711,9920044	0,166100293	712,0014648	0,076034054	712,0023804	0,08150319	712,0023804	0,115293413	712,0023804	0,095047385	712,0014648	0,122916088	711,9920044	0,08882843	711,9920044	0,144878894	711,9920044	0,111136138
712,0272827	0,221457377	712,0263672	0,112285972	712,0169067	0,078150898	712,0169067	0,159079954	712,0263672	0,087925732	712,0272827	0,071221299	712,0272827	0,102405638	712,0272827	0,078039937	712,0263672	0,18974641	712,0169067	0,068999916	712,0169067	0,126840785	712,0169067	0,079712912
712,0521851	0,421162039	712,0512695	0,197503731	712,0418091	0,116220944	712,0418091	0,243878007	712,0512695	0,132446855	712,0521851	0,121387213	712,0521851	0,189516902	712,0521851	0,128745168	712,0512695	0,332982808	712,0418091	0,088847414	712,0418091	0,177057311	712,0418091	0,110516526
712,0770874	0,626972735	712,0761719	0,194947794	712,0667114	0,182802096	712,0667114	0,372800499	712,0761719	0,112585783	712,0770874	0,155814007	712,0770874	0,298884004	712,0770874	0,165740073	712,0761719	0,365764678	712,0667114	0,136856183	712,0667114	0,292639166	712,0667114	0,186985523
712,1019897	0,686945677	712,1010742	0,209622547	712,0916138	0,193965912	712,0916138	0,374701858	712,1010742	0,133701846	712,1019897	0,193716422	712,1019897	0,381368399	712,1019897	0,193720609	712,1010742	0,376792848	712,0916138	0,139397711	712,0916138	0,295181245	712,0916138	0,193870321
712,1268921	0,695195854	712,1259766	0,270533353	712,1165161	0,234701172	712,1165161	0,348338813	712,1259766	0,196772859	712,1268921	0,313110173	712,1268921	0,528783679	712,1268921	0,294089675	712,1259766	0,408270836	712,1165161	0,172728777	712,1165161	0,263402462	712,1165161	0,228334233
712,1517944	0,6051355	712,1508789	0,220059365	712,1414795	0,274136811	712,1414795	0,339341998	712,1508789	0,16997245	712,1517944	0,371311665	712,1517944	0,566265941	712,1517944	0,340268701	712,1508789	0,313115478	712,1414795	0,231342867	712,1414795	0,276667953	712,1414795	0,286192387
712,1766968	0,444575757	712,1757813	0,159449026	712,1663818	0,223752275	712,1663818	0,242165372	712,1757813	0,145092383	712,1766968	0,349174976	712,1766968	0,475975484	712,1766968	0,295491159	712,1757813	0,233311251	712,1663818	0,207679838	712,1663818	0,208877936	712,1663818	0,230659693
712,2015991	0,388528436	712,2006836	0,194791198	712,1912842	0,175302491	712,1912842	0,17554149	712,2006836	0,174009189	712,2015991	0,353552282	712,2015991	0,42839089	712,2015991	0,297149181	712,2006836	0,260901868	712,1912842	0,173724085	712,1912842	0,141145468	712,1912842	0,171151504
712,2265015	0,351029843	712,2255859	0,165227085	712,2161865	0,181410536	712,2161865	0,203109637	712,2255859	0,14062953	712,2265015	0,309659183	712,2265015	0,399786294	712,2265015	0,276761085	712,2255859	0,223648027	712,2161865	0,179518089	712,2161865	0,176923648	712,2161865	0,18820937
712,2514038	0,274276763	712,2504883	0,120882995	712,2410889	0,143601179	712,2410889	0,181462243	712,2504883	0,106784329	712,2514038	0,227625564	712,2514038	0,298328131	712,2514038	0,211884752	712,2504883	0,179532468	712,2410889	0,144371495	712,2410889	0,164515361	712,2410889	0,151094928
712,2763062	0,30796808	712,2753906	0,176144302	712,2659912	0,122238867	712,2659912	0,164103508	712,2753906	0,142903194	712,2763062	0,228027493	712,2763062	0,285739422	712,2763062	0,212292477	712,2753906	0,255157918	712,2659912	0,109743647	712,2659912	0,135364756	712,2659912	0,112640761
712,3012085	0,361553907	712,300293	0,199235603	712,2908936	0,165937454	712,2908936	0,23670651	712,300293	0,141141593	712,3012085	0,230226949	712,3012085	0,321510673	712,3012085	0,234079659	712,300293	0,291906327	712,2908936	0,138478681	712,2908936	0,200467333	712,2908936	0,162470013
712,3261108	0,320039988	712,3251953	0,198711783	712,3157959	0,176867887	712,3157959	0,256061435	712,3251953	0,126349285	712,3261108	0,190404639	712,3261108	0,286037117	712,3261108	0,205338225	712,3251953	0,315063596	712,3157959	0,148251861	712,3157959	0,231488019	712,3157959	0,177608475
712,3510132	0,356357157	712,3500977	0,335945427	712,3406982	0,182376176	712,3406982	0,27025035	712,3500977	0,202832639	712,3510132	0,217157096	712,3510132	0,300816476	712,3510132	0,23369354	712,3500977	0,500094891	712,3406982	0,1429151	712,3406982	0,231742546	712,3406982	0,163973957
712,3759155	0,434013069	712,375	0,500288665	712,3656006	0,265114546	712,3656006	0,407532215	712,375	0,275576681	712,3759155	0,260466725	712,3759155	0,352552176	712,3759155	0,284137487	712,375	0,691136837	712,3656006	0,20601505	712,3656006	0,348413438	712,3656006	0,246138394
712,4008179	0,483598918	712,3999023	0,627547085	712,3905029	0,340125561	712,3905029	0,501767337	712,3999023	0,350910455	712,4008179	0,255218834	712,4008179	0,373079658	712,4008179	0,307665437	712,3999023	0,812611818	712,3905029	0,263637602	712,3905029	0,44842416	712,3905029	0,322646379
712,4257202	0,502511859	712,4248047	0,77447325	712,4154053	0,407662272	712,4154053	0,512231886	712,4248047	0,471933931	712,4257202	0,265415788	712,4257202	0,39075011	712,4257202	0,351683468	712,4248047	0,92973572	712,4154053	0,315741837	712,4154053	0,450538158	712,4154053	0,365398586
712,4506226	0,559601665	712,449707	0,933173478	712,4403076	0,483471364	712,4403076	0,548567653	712,449707	0,627138674	712,4506226	0,355954736	712,4506226	0,495570987	712,4506226	0,478387207	712,449707	1,046929121	712,4403076	0,397029251	712,4403076	0,48208037	712,4403076	0,431570023
712,4755249	0,573450863	712,4746094	0,997707307	712,46521	0,546889067	712,46521	0,59102267	712,4746094	0,726772845	712,4755249	0,410161555	712,4755249	0,565522432	712,4755249	0,575004578	712,4746094	1,061105371	712,46521	0,48061049	712,46521	0,539969385	712,46521	0,502292752
712,5004272	0,492151588	712,4995117	1,011587977	712,4901123	0,542558908	712,4901123	0,558713257	712,4995117	0,807249129	712,5004272	0,420068413	712,5004272	0,540174246	712,5004272	0,605024636	712,4995117	1,043059945	712,4901123	0,505328715	712,4901123	0,521309733	712,4901123	0,496305734
712,5253296	0,495288193	712,5244141	1,060999513	712,5150146	0,552736521	712,5150146	0,512800097	712,5244141	0,920689642	712,5253296	0,473021507	712,5253296	0,576780915	712,5253296	0,662244141	712,5244141	1,025384307	712,5150146	0,516580999	712,5150146	0,470536828	712,5150146	0,493910134
712,550293	0,457407355	712,5493774	0,937940538	712,539917	0,586761475	712,539917	0,476095617	712,5493774	0,914791822	712,550293	0,48726812	712,550293	0,587478697	712,550293	0,688847423	712,5493774	0,820810974	712,539917	0,573826492	712,539917	0,445148408	712,539917	0,547178566
712,5751953	0,300664663	712,5742798	0,70754236	712,5648193	0,496887386	712,5648193	0,323394448	712,5742798	0,821049035	712,5751953	0,433161229	712,5751953	0,485473752	712,5751953	0,620706499	712,5742798	0,555380344	712,5648193	0,539396167	712,5648193	0,319582552	712,5648193	0,476010531
712,6000977	0,217468485	712,5991821	0,557522237	712,5897217	0,353829592	712,5897217	0,186527178	712,5991821	0,729396045	712,6000977	0,421791703	712,6000977	0,413648069	712,6000977	0,563009083	712,5991821	0,424235791	712,5897217	0,431808352	712,5897217	0,181505308	712,5897217	0,331856251
712,625	0,191874474	712,6240845	0,393685788	712,614624	0,270439506	712,614624	0,167431802	712,6240845	0,563368797	712,625	0,367099643	712,625	0,343747199	712,625	0,471906871	712,6240845	0,293566227	712,614624	0,350378513	712,614624	0,155441493	712,614624	0,270081729
712,6499023	0,11467807	712,6489868	0,227166325	712,6395264	0,177164376	712,6395264	0,125778735	712,6489868	0,379485369	712,6499023	0,237200603	712,6499023	0,207397416	712,6499023	0,308362156	712,6489868	0,16293177	712,6395264	0,245030805	712,6395264	0,129309833	712,6395264	0,188349396
712,6748047	0,101578526	712,6738892	0,204217225	712,6644287	0,109747037	712,6644287	0,08030469	712,6738892	0,307117254	712,6748047	0,183375865	712,6748047	0,151209772	712,6748047	0,230872899	712,6738892	0,169955313	712,6644287	0,145775601	712,6644287	0,072339542	712,6644287	0,102400415
712,699707	0,135505691	712,6987915	0,17385751	712,6893311	0,11847353	712,6893311	0,111184455	712,6987915	0,232854173	712,699707	0,167800993	712,699707	0,161387429	712,699707	0,197961807	712,6987915	0,152352929	712,6893311	0,133023411	712,6893311	0,097065747	712,6893311	0,116468132
712,7246094	0,089753874	712,7236938	0,098073848	712,7142334	0,101086721	712,7142334	0,102151491	712,7236938	0,144411936	712,7246094	0,096066318	712,7246094	0,104881726	712,7246094	0,125435784	712,7236938	0,086700991	712,7142334	0,112347186	712,7142334	0,099948905	712,7142334	0,107834339
712,7495117	0,073705606	712,7485962	0,113855012	712,7391968	0,067157939	712,7391968	0,053684205	712,7485962	0,144582123	712,7495117	0,086945869	712,7495117	0,083749428	712,7495117	0,102183037	712,7485962	0,108973421	712,7391968	0,07359384	712,7391968	0,049893867	712,7391968	0,059700802
712,7744141	0,103519261	712,7734985	0,120967522	712,7640991	0,085525319	712,7640991	0,076010153	712,7734985	0,132204652	712,7744141	0,109121755	712,7744141	0,114245646	712,7744141	0,119834371	712,7734985	0,112749048	712,7640991	0,084739096	712,7640991	0,063050479	712,7640991	0,078352526
712,7993164	0,067299679	712,7984009	0,067356296	712,7890015	0,073714063	712,7890015	0,076676853	712,7984009	0,081702888	712,7993164	0,069849446	712,7993164	0,0814071	712,7993164	0,082166448	712,7984009	0,059016872	712,7890015	0,081698924	712,7890015	0,078981921	712,7890015	0,08015088
712,8242188	0,045394897	712,8233032	0,083263487	712,8139038	0,044360053	712,8139038	0,034960926	712,8233032	0,09534245	712,8242188	0,056353226	712,8242188	0,050622396	712,8242188	0,060327288	712,8233032	0,078242712	712,8139038	0,046662688	712,8139038	0,037911721	712,8139038	0,039201859
712,8491211	0,082910098	712,8482056	0,105579071	712,8388062	0,060441878	712,8388062	0,060498361	712,8482056	0,10030897	712,8491211	0,088664122	712,8491211	0,082112946	712,8491211	0,092293404	712,8482056	0,102660745	712,8388062	0,060719687	712,8388062	0,053106494	712,8388062	0,05689916
712,8740234	0,081720404	712,8731079	0,058962051	712,8637085	0,064051703	712,8637085	0,081608541	712,8731079	0,059070803	712,8740234	0,07319732	712,8740234	0,081009664	712,8740234	0,08375214	712,8731079	0,056432448	712,8637085	0,065805539	712,8637085	0,079124764	712,8637085	0,072572589
712,8989258	0,050162062	712,8980103	0,067266807	712,8886108	0,037375487	712,8886108	0,044605359	712,8980103	0,074139237	712,8989258	0,037306689	712,8989258	0,046387229	712,8989258	0,049871944	712,8980103	0,069727868	712,8886108	0,037176419	712,8886108	0,044763915	712,8886108	0,036241181
712,9238281	0,064596638	712,9229126	0,090992965	712,9135132	0,056301203	712,9135132	0,063727453	712,9229126	0,08688318	712,9238281	0,057160165	712,9238281	0,05847485	712,9238281	0,064447626	712,9229126	0,097755529	712,9135132	0,053541049	712,9135132	0,054245427	712,9135132	0,050564021
712,9487305	0,105392925	712,9478149	0,097887516	712,9384155	0,072394468	712,9384155	0,094354041	712,9478149	0,084332094	712,9487305	0,073430866	712,9487305	0,088032037	712,9487305	0,08272291	712,9478149	0,102271065	712,9384155	0,064222366	712,9384155	0,079406947	712,9384155	0,071856141
712,9736328	0,086778082	712,9727173	0,063475087	712,9633179	0,069799356	712,9633179	0,101229668	712,9727173	0,056036189	712,9736328	0,042386763	712,9736328	0,060270131	712,9736328	0,055019926	712,9727173	0,08387813	712,9633179	0,065321304	712,9633179	0,096254006	712,9633179	0,075079434
712,9985352	0,15598391	712,9976196	0,112431489	712,9882202	0,0558086	712,9882202	0,094843917	712,9976196	0,08884757	712,9985352	0,061439287	712,9985352	0,07871028	712,9985352	0,06762135	712,9976196	0,179540843	712,9882202	0,046687488	712,9882202	0,07045418	712,9882202	0,051090632
713,0234375	0,375604123	713,022522	0,160079837	713,0131226	0,099830024	713,0131226	0,206537351	713,022522	0,100066915	713,0234375	0,101391055	713,0234375	0,154923305	713,0234375	0,104566917	713,022522	0,310710102	713,0131226	0,077152163	713,0131226	0,146887183	713,0131226	0,095949359
713,0483398	0,631359816	713,0474243	0,180738777	713,0380249	0,123956405	713,0380249	0,333592743	713,0474243	0,085852236	713,0483398	0,094239838	713,0483398	0,198080584	713,0483398	0,102671623	713,0474243	0,435204655	713,0380249	0,092289165	713,0380249	0,252872437	713,0380249	0,131524548
713,0732422	1,000834227	713,0723267	0,312726527	713,0629272	0,164814636	713,0629272	0,454728633	713,0723267	0,155933723	713,0732422	0,164913252	713,0732422	0,353520691	713,0732422	0,164386168	713,0723267	0,660141587	713,0629272	0,096228451	713,0629272	0,33469829	713,0629272	0,152820706
713,0981445	1,303771615	713,097229	0,405965865	713,0878296	0,287014514	713,0878296	0,626159608	713,097229	0,218727082	713,0981445	0,328110009	713,0981445	0,64188838	713,0981445	0,309385389	713,097229	0,741869926	713,0878296	0,178085148	713,0878296	0,469293863	713,0878296	0,279589742
713,1230469	1,226575136	713,1221313	0,35886687	713,1127319	0,371023297	713,1127319	0,632347345	713,1221313	0,222752422	713,1230469	0,450753957	713,1230469	0,827325761	713,1230469	0,400891215	713,1221313	0,605208814	713,1127319	0,259443969	713,1127319	0,496410996	713,1127319	0,387749493
713,1479492	0,941812694	713,1470337	0,341028869	713,1376343	0,369753867	713,1376343	0,459182531	713,1470337	0,269049853	713,1479492	0,558837771	713,1479492	0,863097131	713,1479492	0,464776516	713,1470337	0,498169571	713,1376343	0,285975903	713,1376343	0,366165012	713,1376343	0,370658845
713,1728516	0,736796141	713,171936	0,305250019	713,1625366	0,357114196	713,1625366	0,361001074	713,171936	0,269058168	713,1728516	0,626429975	713,1728516	0,825311542	713,1728516	0,50691849	713,171936	0,408641338	713,1625366	0,317550629	713,1625366	0,289327592	713,1625366	0,361894459
713,1977539	0,54214704	713,1968384	0,190884933	713,187439	0,294491619	713,187439	0,286468208	713,1968384	0,182218865	713,1977539	0,528557062	713,1977539	0,644392788	713,1977539	0,42930755	713,1968384	0,262114286	713,187439	0,291540116	713,187439	0,248336509	713,187439	0,308931857
713,2226563	0,377918512	713,2217407	0,168252051	713,2123413	0,189634413	713,2123413	0,175362483	713,2217407	0,171053693	713,2226563	0,413597494	713,2226563	0,468142092	713,2226563	0,318696469	713,2217407	0,229445606	713,2123413	0,200593248	713,2123413	0,154168144	713,2123413	0,193368897
713,2475586	0,341624379	713,2467041	0,188878536	713,2372437	0,172117144	713,2372437	0,177015871	713,2467041	0,174567565	713,2475586	0,361116111	713,2475586	0,401686996	713,2475586	0,288199484	713,2467041	0,248622417	713,2372437	0,171142802	713,2372437	0,143680379	713,2372437	0,167155802
713,272522	0,300795466	713,2716064	0,135050684	713,262146	0,166330516	713,262146	0,202663243	713,2716064	0,112318806	713,272522	0,278231353	713,272522	0,332628995	713,272522	0,236074269	713,2716064	0,189374313	713,262146	0,161513254	713,262146	0,18088761	713,262146	0,177228704
713,2974243	0,239483416	713,2965088	0,153761297	713,2870483	0,122837275	713,2870483	0,160517573	713,2965088	0,121996447	713,2974243	0,203081578	713,2974243	0,245069087	713,2974243	0,18055594	713,2965088	0,227905333	713,2870483	0,112505414	713,2870483	0,145236284	713,2870483	0,122053593
713,3223267	0,274905562	713,3214111	0,261543542	713,3119507	0,14737612	713,3119507	0,203757361	713,3214111	0,172604591	713,3223267	0,208422378	713,3223267	0,252294809	713,3223267	0,192433223	713,3214111	0,378636718	713,3119507	0,123218231	713,3119507	0,17605184	713,3119507	0,13342616
713,347229	0,327053517	713,3463135	0,332505941	713,3369141	0,205708027	713,3369141	0,320189744	713,3463135	0,170969263	713,347229	0,216473922	713,347229	0,279870749	713,347229	0,214088097	713,3463135	0,494815946	713,3369141	0,165256023	713,3369141	0,285940737	713,3369141	0,201796472
713,3721313	0,361639559	713,3712158	0,43454051	713,3618164	0,220172375	713,3618164	0,369746625	713,3712158	0,21372427	713,3721313	0,174179286	713,3721313	0,251968592	713,3721313	0,196105659	713,3712158	0,64054513	713,3618164	0,165100917	713,3618164	0,334719509	713,3618164	0,212545902
713,3970337	0,450684309	713,3961182	0,65286237	713,3867188	0,276723713	713,3867188	0,445677996	713,3961182	0,347754866	713,3970337	0,199177951	713,3970337	0,293288618	713,3970337	0,243522927	713,3961182	0,86356467	713,3867188	0,194600701	713,3867188	0,385713309	713,3867188	0,241113707
713,421936	0,580089271	713,4210205	0,900575876	713,4116211	0,427603543	713,4116211	0,582230389	713,4210205	0,531282723	713,421936	0,285415351	713,421936	0,428532451	713,421936	0,369311482	713,4210205	1,062114358	713,4116211	0,312929094	713,4116211	0,502056837	713,4116211	0,376563847
713,4468384	0,541772962	713,4459229	0,999172509	713,4365234	0,530902386	713,4365234	0,600115478	713,4459229	0,663412392	713,4468384	0,326679617	713,4468384	0,488327563	713,4468384	0,459981948	713,4459229	1,057788372	713,4365234	0,435718119	713,4365234	0,541699529	713,4365234	0,484275103
713,4717407	0,469550371	713,4708252	1,092341542	713,4614258	0,534628808	713,4614258	0,502334714	713,4708252	0,836173356	713,4717407	0,39452076	713,4717407	0,518818021	713,4717407	0,555225015	713,4708252	1,085345268	713,4614258	0,491062075	713,4614258	0,466013044	713,4614258	0,476194322
713,4966431	0,474565059	713,4957275	1,130462885	713,4863281	0,545020461	713,4863281	0,515387714	713,4957275	0,937887371	713,4966431	0,476359308	713,4966431	0,553900898	713,4966431	0,655216217	713,4957275	1,084197521	713,4863281	0,54074806	713,4863281	0,466148138	713,4863281	0,493926972
713,5215454	0,421290845	713,5206299	1,030923247	713,5112305	0,530722201	713,5112305	0,507630527	713,5206299	0,921738803	713,5215454	0,4577232	713,5215454	0,514782965	713,5215454	0,646892786	713,5206299	0,934354246	713,5112305	0,53277272	713,5112305	0,469554693	713,5112305	0,499681205
713,5464478	0,328343123	713,5455322	0,938043714	713,5361328	0,467308491	713,5361328	0,38686344	713,5455322	0,937416852	713,5464478	0,413281441	713,5464478	0,444530219	713,5464478	0,596836746	713,5455322	0,799186766	713,5361328	0,478097171	713,5361328	0,354912639	713,5361328	0,428504884
713,5713501	0,305701733	713,5704346	0,812210023	713,5610352	0,439231157	713,5610352	0,314350456	713,5704346	0,897199869	713,5713501	0,432168901	713,5713501	0,448007911	713,5713501	0,598179102	713,5704346	0,645838559	713,5610352	0,471544921	713,5610352	0,275565505	713,5610352	0,402835488
713,5962524	0,233403489	713,5953369	0,559806526	713,5859375	0,370652407	713,5859375	0,252887875	713,5953369	0,718932569	713,5962524	0,380686641	713,5962524	0,386938959	713,5962524	0,525122344	713,5953369	0,402764976	713,5859375	0,430614322	713,5859375	0,234182984	713,5859375	0,355535388
713,6211548	0,138421342	713,6202393	0,393508941	713,6108398	0,229537025	713,6108398	0,133731872	713,6202393	0,573764682	713,6211548	0,294012725	713,6211548	0,259175241	713,6211548	0,39471662	713,6202393	0,278074592	713,6108398	0,302648723	713,6108398	0,130908564	713,6108398	0,224234566
713,6460571	0,145540953	713,6451416	0,325683832	713,6357422	0,171265781	713,6357422	0,113252923	713,6451416	0,470392972	713,6460571	0,25648582	713,6460571	0,219764292	713,6460571	0,327235281	713,6451416	0,252423823	713,6357422	0,224718094	713,6357422	0,096934482	713,6357422	0,162535489
713,6709595	0,145798728	713,6700439	0,201214299	713,6606445	0,153288245	713,6606445	0,14078252	713,6700439	0,309065133	713,6709595	0,189067885	713,6709595	0,184078068	713,6709595	0,240927503	713,6700439	0,156855181	713,6606445	0,187463239	713,6606445	0,130250424	713,6606445	0,159250721
713,6958618	0,103505149	713,6949463	0,141269594	713,6855469	0,096226312	713,6855469	0,090420842	713,6949463	0,220993474	713,6958618	0,117443807	713,6958618	0,116519779	713,6958618	0,150685236	713,6949463	0,121986501	713,6855469	0,116133824	713,6855469	0,084522955	713,6855469	0,093567848
713,7207642	0,146870568	713,7198486	0,171551108	713,7104492	0,08628615	713,7104492	0,078688808	713,7198486	0,209489331	713,7207642	0,124933697	713,7207642	0,135737881	713,7207642	0,150264561	713,7198486	0,163436845	713,7104492	0,089104369	713,7104492	0,063359357	713,7104492	0,076513402
713,7456665	0,150065616	713,744751	0,123629592	713,7353516	0,107340991	713,7353516	0,1104858	713,744751	0,146135405	713,7456665	0,113477841	713,7456665	0,154740393	713,7456665	0,143348962	713,744751	0,112748109	713,7353516	0,107589871	713,7353516	0,103086792	713,7353516	0,111286394
713,7705688	0,105241038	713,7696533	0,076457426	713,7602539	0,073912881	713,7602539	0,066382155	713,7696533	0,105496831	713,7705688	0,085709341	713,7705688	0,119027622	713,7705688	0,114130594	713,7696533	0,070766307	713,7602539	0,076101236	713,7602539	0,070666797	713,7602539	0,075269319
713,7954712	0,071229219	713,7945557	0,109243125	713,7851563	0,054016367	713,7851563	0,045351431	713,7945557	0,128504738	713,7954712	0,085430183	713,7954712	0,091317192	713,7954712	0,095194153	713,7945557	0,106565483	713,7851563	0,057441507	713,7851563	0,039678615	713,7851563	0,046846557
713,8203735	0,097429365	713,819458	0,112021931	713,8100586	0,075300835	713,8100586	0,07956361	713,819458	0,117237642	713,8203735	0,106567599	713,8203735	0,114281245	713,8203735	0,111546233	713,819458	0,108705245	713,8100586	0,076963134	713,8100586	0,07325571	713,8100586	0,078525566
713,8452759	0,077376328	713,8443604	0,058254141	713,8349609	0,067194648	713,8349609	0,078034498	713,8443604	0,065481402	713,8452759	0,07329382	713,8452759	0,081517003	713,8452759	0,081270583	713,8443604	0,053050276	713,8349609	0,073302165	713,8349609	0,082268715	713,8349609	0,077651158
713,8701782	0,049382057	713,8692627	0,067865439	713,8598633	0,036038708	713,8598633	0,038475987	713,8692627	0,074796759	713,8701782	0,050746314	713,8701782	0,048703421	713,8701782	0,053978626	713,8692627	0,066353381	713,8598633	0,038208019	713,8598633	0,040362071	713,8598633	0,035784703
713,8950806	0,077086732	713,894165	0,101502024	713,8847656	0,054257728	713,8847656	0,057124853	713,894165	0,091505557	713,8950806	0,074465781	713,8950806	0,079546653	713,8950806	0,076426394	713,894165	0,103001624	713,8847656	0,050111823	713,8847656	0,049561799	713,8847656	0,047413096
713,9199829	0,085183725	713,9190674	0,062124826	713,909668	0,067746438	713,909668	0,089581482	713,9190674	0,056053899	713,9199829	0,061276931	713,9199829	0,076969132	713,9199829	0,068734109	713,9190674	0,0628535	713,909668	0,067232147	713,909668	0,089010388	713,909668	0,075256616
713,9448853	0,065756142	713,9440308	0,066594869	713,9345703	0,03860141	713,9345703	0,054619268	713,9440308	0,062643208	713,9448853	0,044663545	713,9448853	0,053103935	713,9448853	0,048968066	713,9440308	0,077153653	713,9345703	0,040275507	713,9345703	0,054533739	713,9345703	0,04362091
713,9697876	0,121207163	713,9689331	0,117740475	713,9595337	0,060348842	713,9595337	0,077745743	713,9689331	0,094627872	713,9697876	0,073964015	713,9697876	0,083121322	713,9697876	0,077945113	713,9689331	0,154279858	713,9595337	0,049270768	713,9595337	0,064804316	713,9595337	0,051297046
713,9946899	0,228442147	713,9938354	0,100871928	713,984436	0,090361841	713,984436	0,156449571	713,9938354	0,064369351	713,9946899	0,073032655	713,9946899	0,108509712	713,9946899	0,085871555	713,9938354	0,194913968	713,984436	0,077815071	713,984436	0,130597159	713,984436	0,096680246
714,0196533	0,462210983	714,0187378	0,143296838	714,0093384	0,075719267	714,0093384	0,202747911	714,0187378	0,07167808	714,0196533	0,061192989	714,0196533	0,116579093	714,0196533	0,071577527	714,0187378	0,392159998	714,0093384	0,058955319	714,0093384	0,150126785	714,0093384	0,07771001
714,0445557	1,015585065	714,0436401	0,314299494	714,0342407	0,122473314	714,0342407	0,362097174	714,0436401	0,147011697	714,0445557	0,135987252	714,0445557	0,282767028	714,0445557	0,137754336	714,0436401	0,730443239	714,0342407	0,072458275	714,0342407	0,237433091	714,0342407	0,1077732
714,069458	1,53715229	714,0685425	0,407644808	714,0591431	0,243154407	714,0591431	0,548890293	714,0685425	0,189713761	714,069458	0,253779083	714,069458	0,570314825	714,069458	0,245200306	714,0685425	0,85357666	714,0591431	0,143196613	714,0591431	0,391192734	714,0591431	0,234327629
714,0943604	1,550233603	714,0934448	0,423273116	714,0840454	0,302859843	714,0840454	0,524325788	714,0934448	0,244535699	714,0943604	0,440341145	714,0943604	0,850500107	714,0943604	0,383010685	714,0934448	0,777920842	714,0840454	0,191605553	714,0840454	0,390954465	714,0840454	0,293779731
714,1192627	1,28463304	714,1183472	0,43828553	714,1089478	0,325042754	714,1089478	0,429292977	714,1183472	0,330538124	714,1192627	0,708032012	714,1192627	1,061584592	714,1192627	0,580803692	714,1183472	0,66862905	714,1089478	0,240634292	714,1089478	0,31619215	714,1089478	0,309260547
714,144165	0,920452893	714,1432495	0,334166408	714,1338501	0,337799609	714,1338501	0,384448975	714,1432495	0,296991229	714,144165	0,816131175	714,144165	1,013250709	714,144165	0,633274794	714,1432495	0,467968017	714,1338501	0,288404047	714,1338501	0,301983893	714,1338501	0,337637037
714,1690674	0,581003368	714,1681519	0,212225273	714,1587524	0,263263345	714,1587524	0,265467823	714,1681519	0,221754223	714,1690674	0,690069318	714,1690674	0,75142014	714,1690674	0,514937699	714,1681519	0,29460448	714,1587524	0,252149463	714,1587524	0,222928688	714,1587524	0,274305612
714,1939697	0,425253302	714,1930542	0,201007023	714,1836548	0,187636033	714,1836548	0,173301131	714,1930542	0,211413935	714,1939697	0,562236607	714,1939697	0,561294556	714,1939697	0,417464137	714,1930542	0,267975003	714,1836548	0,189897224	714,1836548	0,137365207	714,1836548	0,184141114
714,2188721	0,362296462	714,2179565	0,168030635	714,2085571	0,179348961	714,2085571	0,190046072	714,2179565	0,169332698	714,2188721	0,43182534	714,2188721	0,444682926	714,2188721	0,338070244	714,2179565	0,219296962	714,2085571	0,178612635	714,2085571	0,153308347	714,2085571	0,184206769
714,2437744	0,281329006	714,2428589	0,108219862	714,2334595	0,141651422	714,2334595	0,161791906	714,2428589	0,108787127	714,2437744	0,316185862	714,2437744	0,328909338	714,2437744	0,247569516	714,2428589	0,150791615	714,2334595	0,145527735	714,2334595	0,149289757	714,2334595	0,151940793
714,2686768	0,231189415	714,2677612	0,145337641	714,2583618	0,105521932	714,2583618	0,124063596	714,2677612	0,129861087	714,2686768	0,247058034	714,2686768	0,257230669	714,2686768	0,197348654	714,2677612	0,206460699	714,2583618	0,099566236	714,2583618	0,105990946	714,2583618	0,096718147
714,2935791	0,253543437	714,2926636	0,184404671	714,2832642	0,130026981	714,2832642	0,166946456	714,2926636	0,146709725	714,2935791	0,23077175	714,2935791	0,25580135	714,2935791	0,197048575	714,2926636	0,255535603	714,2832642	0,111933529	714,2832642	0,133774087	714,2832642	0,122600049
714,3184814	0,255932033	714,3175659	0,159986168	714,3081665	0,152766451	714,3081665	0,220737383	714,3175659	0,107636251	714,3184814	0,189070746	714,3184814	0,239472896	714,3184814	0,177243099	714,3175659	0,240103647	714,3081665	0,133832604	714,3081665	0,195426047	714,3081665	0,158132404
714,3433838	0,237556994	714,3424683	0,213673085	714,3330688	0,141543314	714,3330688	0,223307475	714,3424683	0,126125768	714,3433838	0,146591932	714,3433838	0,1888742	714,3433838	0,150287449	714,3424683	0,329714715	714,3330688	0,115410678	714,3330688	0,195024818	714,3330688	0,136568442
714,3682861	0,336561859	714,3673706	0,392118543	714,3579712	0,187506229	714,3579712	0,287079155	714,3673706	0,22121492	714,3682861	0,183462724	714,3682861	0,245184481	714,3682861	0,203848034	714,3673706	0,562240601	714,3579712	0,138912484	714,3579712	0,242885336	714,3579712	0,16661948
714,3931885	0,476756155	714,3922729	0,541073203	714,3828735	0,290371865	714,3828735	0,438303769	714,3922729	0,285834104	714,3931885	0,20846656	714,3931885	0,312733859	714,3931885	0,254041195	714,3922729	0,780410767	714,3828735	0,224272922	714,3828735	0,380461931	714,3828735	0,272493899
714,4180908	0,618856907	714,4171753	0,760504782	714,4077759	0,358605802	714,4077759	0,51863718	714,4171753	0,411842495	714,4180908	0,219736293	714,4180908	0,366977036	714,4180908	0,295721978	714,4171753	1,062000513	714,4077759	0,274507821	714,4077759	0,466082036	714,4077759	0,319944173
714,4429932	0,80456835	714,4420776	1,11160183	714,4326782	0,460777789	714,4326782	0,589123785	714,4420776	0,654614031	714,4429932	0,322880119	714,4429932	0,573844314	714,4429932	0,464506835	714,4420776	1,383662581	714,4326782	0,35405013	714,4326782	0,536143422	714,4326782	0,393347204
714,4678955	0,83868587	714,46698	1,355803728	714,4575806	0,60980463	714,4575806	0,68352133	714,46698	0,874358416	714,4678955	0,437701195	714,4678955	0,838830888	714,4678955	0,681495845	714,46698	1,484742403	714,4575806	0,504242122	714,4575806	0,643047869	714,4575806	0,538933873
714,4927979	0,672807753	714,4918823	1,462528586	714,4824829	0,659787297	714,4824829	0,64298445	714,4918823	1,075992942	714,4927979	0,521976173	714,4927979	0,916648567	714,4927979	0,842524886	714,4918823	1,403739452	714,4824829	0,589689314	714,4824829	0,623250782	714,4824829	0,593252897
714,5177002	0,558862269	714,5167847	1,508535266	714,5073853	0,656314492	714,5073853	0,535728514	714,5167847	1,280072451	714,5177002	0,625744462	714,5177002	0,896214545	714,5177002	0,976209104	714,5167847	1,291748762	714,5073853	0,6266945	714,5073853	0,521444201	714,5073853	0,581692278
714,5426025	0,470976979	714,541687	1,338956952	714,5322876	0,644199848	714,5322876	0,46823436	714,541687	1,323765278	714,5426025	0,633578598	714,5426025	0,816809714	714,5426025	0,971353889	714,541687	1,026869178	714,5322876	0,667189658	714,5322876	0,453902423	714,5322876	0,589848518
714,5675049	0,30478093	714,5665894	1,011992097	714,557251	0,529120088	714,557251	0,337347746	714,5665894	1,200228691	714,5675049	0,52087003	714,5675049	0,607895613	714,5675049	0,817655921	714,5665894	0,698571146	714,557251	0,608010054	714,557251	0,339667827	714,557251	0,502107382
714,5924072	0,208945066	714,5914917	0,778651357	714,5821533	0,37130186	714,5821533	0,198386922	714,5914917	1,042725682	714,5924072	0,462968439	714,5924072	0,452371299	714,5924072	0,683441222	714,5914917	0,522153556	714,5821533	0,475847065	714,5821533	0,195512161	714,5821533	0,350376189
714,6173096	0,20231618	714,6164551	0,558606625	714,6070557	0,288552582	714,6070557	0,177210256	714,6164551	0,817207038	714,6173096	0,387250066	714,6173096	0,376345187	714,6173096	0,554314137	714,6164551	0,371127069	714,6070557	0,382112026	714,6070557	0,170240372	714,6070557	0,281289905
714,6422119	0,12050119	714,6413574	0,337155074	714,631958	0,199167714	714,631958	0,139980853	714,6413574	0,56158638	714,6422119	0,254410952	714,6422119	0,244666204	714,6422119	0,366352051	714,6413574	0,211992666	714,631958	0,272627473	714,631958	0,142633021	714,631958	0,205648437
714,6671143	0,097211309	714,6662598	0,264819056	714,6568604	0,120882571	714,6568604	0,080417536	714,6662598	0,434791386	714,6671143	0,182987615	714,6671143	0,160632595	714,6671143	0,256106079	714,6662598	0,189552799	714,6568604	0,165993288	714,6568604	0,075746462	714,6568604	0,113990568
714,6920166	0,140422344	714,6911621	0,216025963	714,6817627	0,122592255	714,6817627	0,106015384	714,6911621	0,323152184	714,6920166	0,179715976	714,6920166	0,170035139	714,6920166	0,240183607	714,6911621	0,170198724	714,6817627	0,143951342	714,6817627	0,09016706	714,6817627	0,118119769
714,7169189	0,131998152	714,7160645	0,12032041	714,706665	0,10921587	714,706665	0,105147526	714,7160645	0,20071435	714,7169189	0,136338159	714,7169189	0,144591987	714,7169189	0,181632072	714,7160645	0,092396706	714,706665	0,119487025	714,706665	0,102452561	714,706665	0,114089191
714,7418213	0,084502161	714,7409668	0,113382347	714,7315674	0,077813618	714,7315674	0,06375517	714,7409668	0,171769753	714,7418213	0,084070571	714,7418213	0,089287661	714,7418213	0,110115372	714,7409668	0,09331318	714,7315674	0,09036871	714,7315674	0,068609349	714,7315674	0,075826392
714,7667847	0,096540064	714,7658691	0,131130621	714,7564697	0,064100049	714,7564697	0,049051832	714,7658691	0,173757106	714,7667847	0,100690991	714,7667847	0,109090716	714,7667847	0,116772473	714,7658691	0,119593196	714,7564697	0,072109647	714,7564697	0,044971313	714,7564697	0,054154966
714,791687	0,104795441	714,7907715	0,103022382	714,7813721	0,082806952	714,7813721	0,08133401	714,7907715	0,127513096	714,791687	0,098278433	714,791687	0,115207955	714,791687	0,113786541	714,7907715	0,091916479	714,7813721	0,085947618	714,7813721	0,077295139	714,7813721	0,084181264
714,8165894	0,050204966	714,8156738	0,058148134	714,8062744	0,05799114	714,8062744	0,059063904	714,8156738	0,081984729	714,8165894	0,056279577	714,8165894	0,064521588	714,8165894	0,064639926	714,8156738	0,055442877	714,8062744	0,065471239	714,8062744	0,066807985	714,8062744	0,063881852
714,8414917	0,061424013	714,8405762	0,090228401	714,8311768	0,04035588	714,8311768	0,038265612	714,8405762	0,100181431	714,8414917	0,066658072	714,8414917	0,064747244	714,8414917	0,07260599	714,8405762	0,090795971	714,8311768	0,041118216	714,8311768	0,035272412	714,8311768	0,03438345
714,866394	0,094905004	714,8654785	0,092818946	714,8560791	0,063398421	714,8560791	0,072898634	714,8654785	0,088156447	714,866394	0,072321549	714,866394	0,086185589	714,866394	0,084437661	714,8654785	0,089386776	714,8560791	0,061563246	714,8560791	0,068067133	714,8560791	0,062966377
714,8912964	0,071160689	714,8903809	0,056923132	714,8809814	0,055665016	714,8809814	0,069118969	714,8903809	0,05497374	714,8912964	0,041160483	714,8912964	0,056491423	714,8912964	0,051112648	714,8903809	0,05778151	714,8809814	0,055759031	714,8809814	0,078163631	714,8809814	0,063365482
714,9161987	0,083436124	714,9152832	0,09441077	714,9058838	0,040795434	714,9058838	0,047684059	714,9152832	0,083478399	714,9161987	0,060224283	714,9161987	0,060373396	714,9161987	0,061932761	714,9152832	0,109971873	714,9058838	0,037881225	714,9058838	0,045381811	714,9058838	0,038154427
714,9411011	0,156750903	714,9401855	0,119332232	714,9307861	0,069163024	714,9307861	0,096220903	714,9401855	0,089225948	714,9411011	0,082780384	714,9411011	0,111708432	714,9411011	0,093684942	714,9401855	0,146473229	714,9307861	0,062074982	714,9307861	0,087963209	714,9307861	0,068491951
714,9660034	0,184969023	714,9650879	0,093556166	714,9556885	0,074105367	714,9556885	0,122736	714,9650879	0,064180166	714,9660034	0,056100596	714,9660034	0,095978372	714,9660034	0,071682401	714,9650879	0,15407595	714,9556885	0,070022523	714,9556885	0,124320216	714,9556885	0,085120402
714,9909058	0,390108794	714,9899902	0,183063135	714,9805908	0,063679285	714,9805908	0,161125034	714,9899902	0,104054324	714,9909058	0,076005474	714,9909058	0,121942282	714,9909058	0,088574283	714,9899902	0,38713333	714,9805908	0,051778708	714,9805908	0,123231955	714,9805908	0,063684486
715,0158081	1,071187377	715,0148926	0,356019706	715,0054932	0,126124144	715,0054932	0,406258136	715,0148926	0,150220394	715,0158081	0,139445931	715,0158081	0,277190477	715,0158081	0,167630941	715,0148926	0,859458208	715,0054932	0,090334073	715,0054932	0,26199913	715,0054932	0,120291419
715,0407104	2,203467846	715,0397949	0,572873056	715,0303955	0,219221681	715,0303955	0,740246475	715,0397949	0,200751722	715,0407104	0,207847282	715,0407104	0,543452859	715,0407104	0,25869891	715,0397949	1,434839964	715,0303955	0,133616552	715,0303955	0,489533901	715,0303955	0,218501955
715,0656128	3,328223705	715,0646973	0,895566106	715,0552979	0,363091826	715,0552979	0,953685403	715,0646973	0,40132463	715,0656128	0,464761794	715,0656128	1,120921373	715,0656128	0,513701975	715,0646973	1,873198986	715,0552979	0,188251615	715,0552979	0,625240445	715,0552979	0,329421222
715,0905151	3,572520018	715,0895996	1,039408922	715,0802002	0,58174026	715,0802002	0,952741563	715,0895996	0,610480964	715,0905151	0,99584657	715,0905151	1,916928649	715,0905151	0,972806513	715,0895996	1,790333509	715,0802002	0,35397613	715,0802002	0,655762553	715,0802002	0,540924191
715,1154175	2,742933273	715,114502	0,851102114	715,1051025	0,639209628	715,1051025	0,741785824	715,114502	0,656670213	715,1154175	1,534672379	715,1154175	2,299341679	715,1154175	1,342805743	715,114502	1,287576795	715,1051025	0,485041291	715,1051025	0,55824393	715,1051025	0,628016531
715,1403198	1,925440669	715,1394043	0,647221744	715,1300049	0,500324845	715,1300049	0,475787848	715,1394043	0,635774732	715,1403198	1,753566742	715,1403198	2,154696703	715,1403198	1,410655141	715,1394043	0,889564931	715,1300049	0,456476033	715,1300049	0,361634195	715,1300049	0,49923116
715,1652222	1,387989044	715,1643066	0,499850869	715,1549683	0,396552235	715,1549683	0,349781543	715,1643066	0,543589056	715,1652222	1,748655558	715,1652222	1,838760495	715,1652222	1,333983779	715,1643066	0,65245074	715,1549683	0,395526767	715,1549683	0,27102676	715,1549683	0,39318952
715,1901245	0,921174765	715,189209	0,360276163	715,1798706	0,332712173	715,1798706	0,300045341	715,189209	0,411351591	715,1901245	1,415139318	715,1901245	1,337822437	715,1901245	1,051023841	715,189209	0,463682801	715,1798706	0,340569794	715,1798706	0,249170974	715,1798706	0,340162456
715,2150269	0,588511825	715,2141113	0,258538306	715,2047729	0,25357157	715,2047729	0,230308041	715,2141113	0,317243308	715,2150269	0,957937896	715,2150269	0,862370849	715,2150269	0,705510676	715,2141113	0,340942621	715,2047729	0,272834569	715,2047729	0,20462814	715,2047729	0,26667124
715,2399292	0,445686519	715,2390137	0,246176645	715,2296753	0,168871731	715,2296753	0,152843386	715,2390137	0,27705279	715,2399292	0,668522596	715,2399292	0,596466184	715,2399292	0,498010695	715,2390137	0,319070607	715,2296753	0,181242049	715,2296753	0,127638161	715,2296753	0,163626939
715,2648315	0,39149949	715,263916	0,224075451	715,2545776	0,168564633	715,2545776	0,177852511	715,263916	0,222247511	715,2648315	0,497639835	715,2648315	0,480202943	715,2648315	0,390700281	715,263916	0,284751117	715,2545776	0,167252377	715,2545776	0,148599625	715,2545776	0,167863861
715,2897339	0,293376893	715,2888184	0,155890971	715,27948	0,14400892	715,27948	0,177705705	715,2888184	0,149241239	715,2897339	0,328147858	715,2897339	0,336272687	715,2897339	0,266513437	715,2888184	0,223987252	715,27948	0,144402534	715,27948	0,163405612	715,27948	0,155168757
715,3146362	0,262812197	715,3137817	0,205460563	715,3043823	0,113698557	715,3043823	0,153201878	715,3137817	0,172984183	715,3146362	0,260678828	715,3146362	0,25743258	715,3146362	0,216578379	715,3137817	0,295384645	715,3043823	0,105022863	715,3043823	0,132804409	715,3043823	0,108997717
715,3395386	0,325785905	715,3386841	0,271568298	715,3292847	0,160340041	715,3292847	0,229244858	715,3386841	0,190506637	715,3395386	0,255243182	715,3395386	0,289937943	715,3395386	0,235500261	715,3386841	0,382084876	715,3292847	0,13313596	715,3292847	0,189170659	715,3292847	0,155164644
715,3644409	0,339274615	715,3635864	0,293499202	715,354187	0,196677953	715,354187	0,282474577	715,3635864	0,177126154	715,3644409	0,207081005	715,3644409	0,258662999	715,3644409	0,211794123	715,3635864	0,433169693	715,354187	0,158016354	715,354187	0,249763161	715,354187	0,193591148
715,3893433	0,377945781	715,3884888	0,459760368	715,3790894	0,206746727	715,3790894	0,29666993	715,3884888	0,270430535	715,3893433	0,198771328	715,3893433	0,261533886	715,3893433	0,225335807	715,3884888	0,678592086	715,3790894	0,158793807	715,3790894	0,26167354	715,3790894	0,186193541
715,4142456	0,604382753	715,4133911	0,734970629	715,4039917	0,302059174	715,4039917	0,456414521	715,4133911	0,399198383	715,4142456	0,270018518	715,4142456	0,383230448	715,4142456	0,312984437	715,4133911	1,109612107	715,4039917	0,230560854	715,4039917	0,395684242	715,4039917	0,26260978
715,4391479	0,950066805	715,4382935	1,078883052	715,428894	0,433859289	715,428894	0,720753491	715,4382935	0,541657329	715,4391479	0,296585023	715,4391479	0,524304986	715,4391479	0,404776603	715,4382935	1,657587647	715,428894	0,313673913	715,428894	0,63207984	715,428894	0,379181147
715,4640503	1,448524833	715,4631958	1,645712733	715,4537964	0,625118196	715,4537964	1,011570811	715,4631958	0,888689935	715,4640503	0,384842366	715,4640503	0,802954495	715,4640503	0,595121145	715,4631958	2,302575111	715,4537964	0,412399381	715,4537964	0,859116614	715,4537964	0,49336338
715,4890137	1,914000154	715,4880981	2,160009146	715,4786987	0,990500271	715,4786987	1,25780642	715,4880981	1,348670363	715,4890137	0,634008944	715,4890137	1,354339719	715,4890137	0,990702748	715,4880981	2,61623311	715,4786987	0,67213285	715,4786987	1,066061139	715,4786987	0,752753913
715,513916	1,816134691	715,5130005	2,223592997	715,5036011	1,267609715	715,5036011	1,18604362	715,5130005	1,692362309	715,513916	0,911665797	715,513916	1,839895248	715,513916	1,422424078	715,5130005	2,296932459	715,5036011	1,003713608	715,5036011	1,034321427	715,5036011	0,997886539
715,5388184	1,308091283	715,5379028	1,962127686	715,5285034	1,20507884	715,5285034	0,817925036	715,5379028	1,879925251	715,5388184	1,150703788	715,5388184	1,934341192	715,5388184	1,701177955	715,5379028	1,764583349	715,5285034	1,152920723	715,5285034	0,746108294	715,5285034	0,961332917
715,5637207	0,973407328	715,5628052	1,56547153	715,5534058	0,957080126	715,5534058	0,541693151	715,5628052	1,802396059	715,5637207	1,266197205	715,5637207	1,801186681	715,5637207	1,755099416	715,5628052	1,280298233	715,5534058	1,098240376	715,5534058	0,49857235	715,5534058	0,801169038
715,588623	0,75067085	715,5877075	1,076249599	715,5783081	0,68996352	715,5783081	0,386167854	715,5877075	1,444856167	715,588623	1,206496358	715,588623	1,520821929	715,588623	1,614559531	715,5877075	0,814497411	715,5783081	0,881157458	715,5783081	0,375853032	715,5783081	0,61744678
715,6135254	0,461078048	715,6126099	0,778284311	715,6032104	0,415140331	715,6032104	0,22085683	715,6126099	1,158405542	715,6135254	0,931743562	715,6135254	1,037306786	715,6135254	1,214012146	715,6126099	0,568574488	715,6032104	0,5864079	715,6032104	0,219597965	715,6032104	0,383718014
715,6384277	0,298129261	715,6375122	0,616445005	715,6281128	0,289880842	715,6281128	0,15821068	715,6375122	0,956439495	715,6384277	0,679680109	715,6384277	0,690230548	715,6384277	0,868694067	715,6375122	0,465605259	715,6281128	0,420209944	715,6281128	0,149365604	715,6281128	0,258626819
715,6633301	0,272389501	715,6624146	0,451086313	715,6530151	0,242268473	715,6530151	0,168381259	715,6624146	0,70521462	715,6633301	0,51049906	715,6633301	0,514477968	715,6633301	0,641912341	715,6624146	0,359698802	715,6530151	0,334692568	715,6530151	0,149919748	715,6530151	0,226640806
715,6882324	0,206723511	715,6873169	0,273470104	715,6779175	0,185085908	715,6779175	0,158133522	715,6873169	0,461797059	715,6882324	0,333831429	715,6882324	0,346423119	715,6882324	0,424149185	715,6873169	0,223635241	715,6779175	0,236653537	715,6779175	0,14875491	715,6779175	0,182918951
715,7131348	0,168274269	715,7122192	0,233117878	715,7028198	0,118166767	715,7028198	0,097783588	715,7122192	0,356879324	715,7131348	0,230950862	715,7131348	0,241920367	715,7131348	0,289022952	715,7122192	0,212264776	715,7028198	0,145751953	715,7028198	0,086408079	715,7028198	0,108381838
715,7380371	0,209617078	715,7371216	0,216744587	715,7277222	0,129620001	715,7277222	0,113031447	715,7371216	0,287056625	715,7380371	0,213947281	715,7380371	0,234568149	715,7380371	0,25546819	715,7371216	0,207210615	715,7277222	0,137921765	715,7277222	0,094184257	715,7277222	0,115507111
715,7629395	0,168543011	715,7620239	0,128635511	715,7526855	0,121721193	715,7526855	0,114314042	715,7620239	0,184045032	715,7629395	0,158634454	715,7629395	0,19433108	715,7629395	0,19601424	715,7620239	0,12442679	715,7526855	0,129478976	715,7526855	0,116519123	715,7526855	0,123335771
715,7878418	0,107565582	715,7869263	0,127240539	715,7775879	0,071351096	715,7775879	0,057577185	715,7869263	0,167962745	715,7878418	0,124917448	715,7878418	0,136291981	715,7878418	0,141663969	715,7869263	0,12447641	715,7775879	0,075861715	715,7775879	0,057974555	715,7775879	0,062961705
715,8127441	0,127907515	715,8118286	0,146239594	715,8024902	0,082349248	715,8024902	0,073245876	715,8118286	0,165723085	715,8127441	0,144734368	715,8127441	0,15344879	715,8127441	0,151399359	715,8118286	0,149884731	715,8024902	0,080743998	715,8024902	0,061611887	715,8024902	0,069600381
715,8376465	0,124255098	715,836731	0,090384357	715,8273926	0,085562468	715,8273926	0,097467601	715,836731	0,102644011	715,8376465	0,109340265	715,8376465	0,129373282	715,8376465	0,126368478	715,836731	0,087735258	715,8273926	0,089354463	715,8273926	0,093456358	715,8273926	0,091052331
715,8625488	0,083687909	715,8616333	0,090017468	715,8522949	0,049488511	715,8522949	0,050467223	715,8616333	0,099891469	715,8625488	0,07172846	715,8625488	0,080720939	715,8625488	0,082647197	715,8616333	0,092155494	715,8522949	0,05166823	715,8522949	0,055840418	715,8522949	0,047891606
715,8874512	0,112869546	715,8865356	0,135287374	715,8771973	0,058871716	715,8771973	0,06184309	715,8865356	0,129070982	715,8874512	0,100603476	715,8874512	0,103757545	715,8874512	0,108045273	715,8865356	0,141950741	715,8771973	0,057482004	715,8771973	0,053658146	715,8771973	0,053293038
715,9123535	0,126318917	715,911438	0,096440211	715,9020996	0,082528405	715,9020996	0,101944707	715,911438	0,086712748	715,9123535	0,091283128	715,9123535	0,116540045	715,9123535	0,102579586	715,911438	0,101208717	715,9020996	0,08214137	715,9020996	0,10268309	715,9020996	0,091540344
715,9372559	0,093113676	715,9363403	0,089782901	715,927002	0,056733001	715,927002	0,068632618	715,9363403	0,081031263	715,9372559	0,063897841	715,9372559	0,080335252	715,9372559	0,073944554	715,9363403	0,100921899	715,927002	0,056915909	715,927002	0,071986057	715,927002	0,056534637
715,9621582	0,146651253	715,9612427	0,152857438	715,9519043	0,062955603	715,9519043	0,080012664	715,9612427	0,125273913	715,9621582	0,09658464	715,9621582	0,115011066	715,9621582	0,105350383	715,9612427	0,185855225	715,9519043	0,054192085	715,9519043	0,068247668	715,9519043	0,054347556
715,9870605	0,240844369	715,986145	0,14547129	715,9768066	0,09611278	715,9768066	0,156230256	715,986145	0,10302721	715,9870605	0,10333813	715,9870605	0,147897467	715,9870605	0,118843302	715,986145	0,205703974	715,9768066	0,090390399	715,9768066	0,132614464	715,9768066	0,104512028
716,0119629	0,327394992	716,0111084	0,157054678	716,001709	0,087024689	716,001709	0,195339903	716,0111084	0,0985853	716,0119629	0,090738587	716,0119629	0,141030416	716,0119629	0,107695937	716,0111084	0,316484243	716,001709	0,075201683	716,001709	0,146371022	716,001709	0,091999389
716,0368652	0,554507673	716,0360107	0,293948889	716,0266113	0,113898367	716,0266113	0,286199272	716,0360107	0,168051884	716,0368652	0,10127601	716,0368652	0,169279382	716,0368652	0,119884454	716,0360107	0,58624655	716,0266113	0,07550668	716,0266113	0,188142672	716,0266113	0,09796349
716,0617676	1,021736026	716,0609131	0,369070292	716,0515137	0,199098319	716,0515137	0,423620909	716,0609131	0,202023387	716,0617676	0,195791617	716,0617676	0,360799551	716,0617676	0,213953063	716,0609131	0,712303042	716,0515137	0,13030389	716,0515137	0,285079837	716,0515137	0,181175411
716,0866699	1,299390435	716,0858154	0,356111199	716,076416	0,247837037	716,076416	0,456418335	716,0858154	0,195713356	716,0866699	0,296427518	716,0866699	0,579148054	716,0866699	0,295663655	716,0858154	0,676927745	716,076416	0,161687717	716,076416	0,32521677	716,076416	0,238216117
716,1115723	1,167831898	716,1107178	0,379985899	716,1013184	0,260458827	716,1013184	0,358229518	716,1107178	0,268639445	716,1115723	0,452121347	716,1115723	0,761894464	716,1115723	0,412433922	716,1107178	0,611138463	716,1013184	0,176501676	716,1013184	0,257985502	716,1013184	0,237773746
716,1364746	0,921786666	716,1356201	0,376972079	716,1262207	0,282032609	716,1262207	0,311219215	716,1356201	0,308156997	716,1364746	0,647445738	716,1364746	0,860039532	716,1364746	0,544353306	716,1356201	0,526294231	716,1262207	0,22547856	716,1262207	0,230957359	716,1262207	0,260521203
716,161377	0,657517135	716,1605225	0,260136396	716,151123	0,267097592	716,151123	0,288018584	716,1605225	0,239514768	716,161377	0,654653728	716,161377	0,745658219	716,161377	0,52246511	716,1605225	0,350275397	716,151123	0,240937665	716,151123	0,23384963	716,151123	0,262880504
716,1862793	0,431343168	716,1854248	0,213238701	716,1760254	0,188172251	716,1760254	0,181315109	716,1854248	0,216643974	716,1862793	0,527504027	716,1862793	0,539391696	716,1862793	0,406750113	716,1854248	0,277023673	716,1760254	0,17906104	716,1760254	0,152253702	716,1760254	0,18209745
716,2111816	0,35591954	716,2103271	0,230309799	716,2009277	0,169942811	716,2009277	0,156030014	716,2103271	0,224096894	716,2111816	0,442885906	716,2111816	0,440167904	716,2111816	0,3526811	716,2103271	0,276248157	716,2009277	0,166258752	716,2009277	0,124212153	716,2009277	0,15710178
716,236145	0,294593275	716,2352295	0,155439004	716,2258301	0,166849822	716,2258301	0,176062196	716,2352295	0,152245194	716,236145	0,338339329	716,236145	0,352444887	716,236145	0,279901922	716,2352295	0,187306896	716,2258301	0,167943314	716,2258301	0,154139727	716,2258301	0,170344427
716,2610474	0,214496717	716,2601318	0,126194566	716,2507324	0,106751218	716,2507324	0,123708092	716,2601318	0,128392532	716,2610474	0,236006558	716,2610474	0,235557333	716,2610474	0,191900849	716,2601318	0,164056182	716,2507324	0,11340148	716,2507324	0,112835929	716,2507324	0,111159168
716,2859497	0,22833623	716,2850342	0,178728521	716,2756348	0,103110775	716,2756348	0,127027541	716,2850342	0,157388911	716,2859497	0,225503117	716,2859497	0,226885185	716,2859497	0,193135306	716,2850342	0,232423335	716,2756348	0,097994842	716,2756348	0,102023691	716,2756348	0,09432482
716,3108521	0,245282367	716,3099365	0,163393945	716,3005371	0,143372416	716,3005371	0,20044592	716,3099365	0,12600024	716,3108521	0,19111383	716,3108521	0,224893585	716,3108521	0,178286254	716,3099365	0,221033603	716,3005371	0,129765213	716,3005371	0,174212158	716,3005371	0,148089603
716,3357544	0,211397156	716,3348389	0,169799164	716,3254395	0,136977091	716,3254395	0,193478152	716,3348389	0,120859787	716,3357544	0,142941445	716,3357544	0,173329398	716,3357544	0,137291864	716,3348389	0,247648299	716,3254395	0,116440922	716,3254395	0,173240647	716,3254395	0,135790184
716,3606567	0,264688939	716,3597412	0,29711321	716,3504028	0,161315799	716,3504028	0,209364504	716,3597412	0,192989752	716,3606567	0,175724506	716,3606567	0,202502012	716,3606567	0,176659599	716,3597412	0,422845602	716,3504028	0,123565294	716,3504028	0,173321649	716,3504028	0,135602534
716,3855591	0,353840053	716,3846436	0,424462497	716,3753052	0,228431985	716,3753052	0,331670821	716,3846436	0,233489335	716,3855591	0,195664182	716,3855591	0,253437638	716,3855591	0,211493492	716,3846436	0,61729151	716,3753052	0,187486812	716,3753052	0,286924511	716,3753052	0,214598641
716,4104614	0,414436668	716,4095459	0,636887789	716,4002075	0,273615211	716,4002075	0,44275701	716,4095459	0,314569265	716,4104614	0,174979225	716,4104614	0,258475333	716,4104614	0,220297098	716,4095459	0,944955707	716,4002075	0,212256595	716,4002075	0,396868646	716,4002075	0,25025171
716,4353638	0,555663347	716,4344482	1,082980752	716,4251099	0,374836177	716,4251099	0,628870606	716,4344482	0,564828753	716,4353638	0,229550734	716,4353638	0,344185144	716,4353638	0,301095515	716,4344482	1,49508822	716,4251099	0,260969907	716,4251099	0,5422194	716,4251099	0,310797781
716,4602661	0,793770313	716,4593506	1,528517127	716,4500122	0,606475711	716,4500122	0,919795215	716,4593506	0,86845237	716,4602661	0,315275609	716,4602661	0,503525436	716,4602661	0,435168445	716,4593506	1,918010831	716,4500122	0,427715391	716,4500122	0,777001441	716,4500122	0,515922189
716,4851685	1,048950791	716,4842529	1,72627008	716,4749146	0,832547188	716,4749146	1,041668892	716,4842529	1,092254639	716,4851685	0,418358207	716,4851685	0,73937726	716,4851685	0,640195787	716,4842529	2,001849651	716,4749146	0,623662591	716,4749146	0,886617005	716,4749146	0,699314713
716,5100708	1,085653782	716,5091553	1,843197227	716,4998169	0,939134836	716,4998169	0,961202264	716,5091553	1,362740517	716,5100708	0,570337772	716,5100708	0,962903619	716,5100708	0,893228829	716,5091553	1,955081224	716,4998169	0,750662029	716,4998169	0,809092581	716,4998169	0,765332043
716,5349731	0,961218476	716,5340576	1,782879591	716,5247192	0,998939395	716,5247192	0,837470651	716,5340576	1,595755458	716,5349731	0,802604735	716,5349731	1,175505519	716,5349731	1,166358232	716,5340576	1,691315293	716,5247192	0,877002239	716,5247192	0,702280521	716,5247192	0,818339646
716,5598755	0,715366364	716,55896	1,423725128	716,5496216	0,912976682	716,5496216	0,645730257	716,55896	1,518428445	716,5598755	0,900354028	716,5598755	1,138205409	716,5598755	1,244413614	716,55896	1,214475155	716,5496216	0,925665319	716,5496216	0,567385375	716,5496216	0,786617815
716,5847778	0,446606189	716,5838623	1,039228797	716,5745239	0,659295917	716,5745239	0,395807266	716,5838623	1,305336714	716,5847778	0,826932788	716,5847778	0,876089633	716,5847778	1,090095043	716,5838623	0,83282131	716,5745239	0,761830568	716,5745239	0,364114493	716,5745239	0,584274471
716,6096802	0,320665747	716,6087646	0,789310157	716,5994263	0,458628953	716,5994263	0,253514707	716,6087646	1,084470987	716,6096802	0,712810695	716,6096802	0,667160153	716,6096802	0,895263851	716,6087646	0,62013793	716,5994263	0,569193244	716,5994263	0,221200675	716,5994263	0,410182506
716,6345825	0,246683642	716,633667	0,524858952	716,6243286	0,341218174	716,6243286	0,219340056	716,633667	0,787469387	716,6345825	0,524931669	716,6345825	0,48334682	716,6345825	0,666256964	716,633667	0,397737116	716,6243286	0,433929414	716,6243286	0,199448466	716,6243286	0,326050103
716,6594849	0,14814207	716,6585693	0,331209242	716,649231	0,209604695	716,649231	0,140188634	716,6585693	0,548622847	716,6594849	0,341840029	716,6594849	0,299299002	716,6594849	0,439461619	716,6585693	0,257289052	716,649231	0,281372309	716,649231	0,136064917	716,649231	0,210144088
716,6843872	0,150630474	716,6834717	0,29346016	716,6741333	0,143147573	716,6741333	0,10224425	716,6834717	0,438593835	716,6843872	0,273029476	716,6843872	0,236714989	716,6843872	0,333510071	716,6834717	0,248642534	716,6741333	0,180895835	716,6741333	0,086595267	716,6741333	0,13300021
716,7092896	0,158982292	716,7084351	0,214239955	716,6990356	0,149446726	716,6990356	0,136773601	716,7084351	0,30935964	716,7092896	0,210363165	716,7092896	0,20443517	716,7092896	0,252453893	716,7084351	0,189269036	716,6990356	0,17035374	716,6990356	0,120909251	716,6990356	0,145486742
716,7341919	0,09699966	716,7333374	0,136246368	716,723938	0,111772731	716,723938	0,101350129	716,7333374	0,206881166	716,7341919	0,127156809	716,7341919	0,128176406	716,7341919	0,15407218	716,7333374	0,120093159	716,723938	0,125793219	716,723938	0,102186836	716,723938	0,1103523
716,7590942	0,101617724	716,7582397	0,159052923	716,7488403	0,077447392	716,7488403	0,05863696	716,7582397	0,199368104	716,7590942	0,12832956	716,7590942	0,120125547	716,7590942	0,146381214	716,7582397	0,1498494	716,7488403	0,085159205	716,7488403	0,053777214	716,7488403	0,069340385
716,7839966	0,125229463	716,7831421	0,139302269	716,7737427	0,094609126	716,7737427	0,092076547	716,7831421	0,164603144	716,7839966	0,128375977	716,7839966	0,135802656	716,7839966	0,14703086	716,7831421	0,129937217	716,7737427	0,100463375	716,7737427	0,082754195	716,7737427	0,095844649
716,8088989	0,067794546	716,8080444	0,084982917	716,798645	0,078184642	716,798645	0,078780681	716,8080444	0,105749808	716,8088989	0,075757019	716,8088989	0,088854618	716,8088989	0,089400977	716,8080444	0,077457719	716,798645	0,084639877	716,798645	0,082418039	716,798645	0,083576858
716,8338013	0,068603449	716,8329468	0,118372411	716,8235474	0,053927422	716,8235474	0,046665844	716,8329468	0,1251169	716,8338013	0,079225056	716,8338013	0,074442513	716,8338013	0,086853519	716,8329468	0,116846323	716,8235474	0,054954406	716,8235474	0,044636324	716,8235474	0,046435591
716,8587036	0,099794611	716,8578491	0,124144353	716,8484497	0,076680489	716,8484497	0,079337947	716,8578491	0,11734727	716,8587036	0,10070505	716,8587036	0,108422376	716,8587036	0,112913713	716,8578491	0,119949453	716,8484497	0,074184112	716,8484497	0,072471291	716,8484497	0,07364171
716,883606	0,090609737	716,8827515	0,074835256	716,8733521	0,072232105	716,8733521	0,080608591	716,8827515	0,076711141	716,883606	0,077587105	716,883606	0,095210403	716,883606	0,092954539	716,8827515	0,07550934	716,8733521	0,071706466	716,8733521	0,086457729	716,8733521	0,077629939
716,9085083	0,059308272	716,9076538	0,090403482	716,8982544	0,046637967	716,8982544	0,050614107	716,9076538	0,092454165	716,9085083	0,052175552	716,9085083	0,056495529	716,9085083	0,061236966	716,9076538	0,095683314	716,8982544	0,048930544	716,8982544	0,051390618	716,8982544	0,043284439
716,9334106	0,091350995	716,9325562	0,131610185	716,9231567	0,068487175	716,9231567	0,075068593	716,9325562	0,11838311	716,9334106	0,081052013	716,9334106	0,082924865	716,9334106	0,084381714	716,9325562	0,138229981	716,9231567	0,062607929	716,9231567	0,066052027	716,9231567	0,059405729
716,958374	0,124094054	716,9574585	0,109823607	716,9481201	0,087609902	716,9481201	0,11325109	716,9574585	0,093134023	716,958374	0,078399211	716,958374	0,106301233	716,958374	0,091775313	716,9574585	0,114975601	716,9481201	0,082501851	716,9481201	0,107911259	716,9481201	0,089268133
716,9832764	0,10479103	716,9823608	0,092144005	716,9730225	0,070121847	716,9730225	0,100426681	716,9823608	0,081685871	716,9832764	0,054697517	716,9832764	0,074769586	716,9832764	0,069284514	716,9823608	0,114314102	716,9730225	0,066620216	716,9730225	0,097843148	716,9730225	0,071088396
717,0081787	0,199672714	717,0072632	0,158298656	716,9979248	0,072429955	716,9979248	0,125819117	717,0072632	0,125635639	717,0081787	0,08861547	717,0081787	0,10773237	717,0081787	0,096684933	717,0072632	0,221455812	716,9979248	0,060419612	716,9979248	0,089340106	716,9979248	0,063611344
717,0330811	0,369854957	717,0321655	0,167189434	717,0228271	0,130678087	717,0228271	0,254981428	717,0321655	0,118144095	717,0330811	0,108979113	717,0330811	0,170791507	717,0330811	0,125092968	717,0321655	0,271954209	717,0228271	0,099814914	717,0228271	0,181348547	717,0228271	0,125663847
717,0579834	0,492570221	717,0570679	0,155130967	717,0477295	0,155182853	717,0477295	0,325439155	717,0570679	0,103109442	717,0579834	0,104055479	717,0579834	0,190450013	717,0579834	0,114141896	717,0570679	0,288928926	717,0477295	0,107305147	717,0477295	0,218846872	717,0477295	0,144483119
717,0828857	0,612432301	717,0819702	0,22201243	717,0726318	0,190706447	717,0726318	0,323993891	717,0819702	0,162795693	717,0828857	0,191551179	717,0828857	0,305882663	717,0828857	0,184284493	717,0819702	0,363180339	717,0726318	0,11813809	717,0726318	0,206121206	717,0726318	0,158353373
717,1077881	0,619452715	717,1068726	0,225418061	717,0975342	0,259729207	717,0975342	0,346553385	717,1068726	0,171707883	717,1077881	0,284283876	717,1077881	0,435306966	717,1077881	0,261395723	717,1068726	0,326485276	717,0975342	0,184671819	717,0975342	0,243647724	717,0975342	0,233939365
717,1326904	0,47988072	717,1317749	0,155023932	717,1224365	0,250613481	717,1224365	0,292628944	717,1317749	0,137348592	717,1326904	0,302170187	717,1326904	0,410897225	717,1326904	0,255604059	717,1317749	0,223267227	717,1224365	0,205069378	717,1224365	0,230950266	717,1224365	0,2386695
717,1575928	0,380478859	717,1566772	0,17652154	717,1473389	0,20639585	717,1473389	0,201515853	717,1566772	0,16606915	717,1575928	0,338524967	717,1575928	0,382726192	717,1575928	0,269929171	717,1566772	0,228166193	717,1473389	0,178918615	717,1473389	0,152820781	717,1473389	0,18137221
717,1824951	0,348701239	717,1815796	0,164047629	717,1722412	0,206814408	717,1722412	0,202025369	717,1815796	0,151895478	717,1824951	0,336448371	717,1824951	0,369053304	717,1824951	0,277263165	717,1815796	0,203666061	717,1722412	0,196930259	717,1722412	0,156815499	717,1722412	0,194655851
717,2073975	0,236214012	717,2064819	0,100716241	717,1971436	0,166748479	717,1971436	0,166234508	717,2064819	0,102975413	717,2073975	0,254428387	717,2073975	0,268475145	717,2073975	0,20445621	717,2064819	0,126734093	717,1971436	0,172619954	717,1971436	0,146965876	717,1971436	0,170712858
717,2322998	0,182166055	717,2313843	0,125307143	717,2220459	0,111135103	717,2220459	0,100299738	717,2313843	0,120552987	717,2322998	0,207045093	717,2322998	0,199631274	717,2322998	0,16865705	717,2313843	0,152662709	717,2220459	0,119812891	717,2220459	0,084778965	717,2220459	0,10185121
717,2572021	0,20436801	717,2562866	0,14180702	717,2469482	0,123155966	717,2469482	0,133851185	717,2562866	0,121284842	717,2572021	0,206622869	717,2572021	0,21754013	717,2572021	0,175246641	717,2562866	0,166233525	717,2469482	0,124197394	717,2469482	0,110072196	717,2469482	0,121850051
717,2821045	0,179959506	717,281189	0,093100533	717,2718506	0,119712524	717,2718506	0,144910172	717,281189	0,080144651	717,2821045	0,164627925	717,2821045	0,186339468	717,2821045	0,147937268	717,281189	0,120869339	717,2718506	0,115651257	717,2718506	0,134860665	717,2718506	0,127453089
717,3070068	0,138351738	717,3060913	0,13707225	717,2967529	0,093348153	717,2967529	0,117022775	717,3060913	0,111304149	717,3070068	0,122129098	717,3070068	0,136483535	717,3070068	0,10949111	717,3060913	0,186197042	717,2967529	0,083969317	717,2967529	0,104061589	717,2967529	0,085832648
717,3319092	0,175827339	717,3309937	0,196047455	717,3216553	0,133941337	717,3216553	0,178178102	717,3309937	0,139854252	717,3319092	0,140824497	717,3319092	0,144236848	717,3319092	0,132382259	717,3309937	0,268828422	717,3216553	0,113731198	717,3216553	0,147376895	717,3216553	0,123509288
717,3568115	0,22444801	717,355896	0,236020669	717,3465576	0,160260484	717,3465576	0,237674445	717,355896	0,138305023	717,3568115	0,140418813	717,3568115	0,176747441	717,3568115	0,145312414	717,355896	0,348931223	717,3465576	0,134202853	717,3465576	0,212241217	717,3465576	0,159589022
717,3817139	0,223718703	717,3807983	0,350093335	717,37146	0,175775483	717,37146	0,282972395	717,3807983	0,166204453	717,3817139	0,109792739	717,3817139	0,15199396	717,3817139	0,132676154	717,3807983	0,54847002	717,37146	0,137441516	717,37146	0,260195762	717,37146	0,168443948
717,4066162	0,361470342	717,4057617	0,695135176	717,3963623	0,234199569	717,3963623	0,410870016	717,4057617	0,336420953	717,4066162	0,16083464	717,4066162	0,219368264	717,4066162	0,203095481	717,4057617	1,020945191	717,3963623	0,154882669	717,3963623	0,361790568	717,3963623	0,196926102
717,4315186	0,589497387	717,4306641	1,134200215	717,4212646	0,415271252	717,4212646	0,71849966	717,4306641	0,559959114	717,4315186	0,233358085	717,4315186	0,381597936	717,4315186	0,332753956	717,4306641	1,553325891	717,4212646	0,273508906	717,4212646	0,613749087	717,4212646	0,357865125
717,4564209	0,753805578	717,4555664	1,563781381	717,446167	0,638370454	717,446167	0,995152712	717,4555664	0,869253576	717,4564209	0,286864161	717,4564209	0,509212136	717,4564209	0,485167801	717,4555664	1,958393335	717,446167	0,423873007	717,446167	0,849459827	717,446167	0,541220188
717,4813232	0,89502579	717,4804688	1,953684568	717,4710693	0,8849563	717,4710693	1,079186916	717,4804688	1,29937315	717,4813232	0,467237353	717,4813232	0,732357502	717,4813232	0,747278214	717,4804688	2,142063618	717,4710693	0,617729783	717,4710693	0,905560315	717,4710693	0,722055972
717,5062256	0,89855355	717,5053711	1,984527707	717,4959717	1,081782579	717,4959717	1,01271522	717,5053711	1,600413918	717,5062256	0,678592741	717,5062256	0,950507402	717,5062256	1,041032791	717,5053711	1,916074872	717,4959717	0,868990123	717,4959717	0,854145169	717,4959717	0,909752369
717,5311279	0,682824731	717,5302734	1,653631806	717,520874	1,023441076	717,520874	0,757854521	717,5302734	1,641773462	717,5311279	0,768125653	717,5311279	0,945228219	717,5311279	1,143955112	717,5302734	1,414177299	717,520874	0,972946048	717,520874	0,666605592	717,520874	0,897588432
717,5560303	0,470835596	717,5551758	1,29395318	717,5458374	0,782890737	717,5458374	0,475223333	717,5551758	1,530730844	717,5560303	0,794326186	717,5560303	0,815367997	717,5560303	1,114609122	717,5551758	1,038674355	717,5458374	0,862644136	717,5458374	0,421404183	717,5458374	0,689336956
717,5809326	0,365683794	717,5800781	0,946602106	717,5707397	0,578200281	717,5707397	0,34136489	717,5800781	1,255115032	717,5809326	0,741680861	717,5809326	0,679316103	717,5809326	0,981905878	717,5800781	0,723065794	717,5707397	0,70158571	717,5707397	0,305886298	717,5707397	0,527276874
717,605835	0,222112536	717,6049805	0,59900862	717,5956421	0,394646734	717,5956421	0,242260307	717,6049805	0,916086018	717,605835	0,53914386	717,605835	0,474530518	717,605835	0,718621552	717,6049805	0,428992808	717,5956421	0,506130934	717,5956421	0,233506605	717,5956421	0,383991659
717,6307373	0,135080621	717,6298828	0,438260317	717,6205444	0,233957738	717,6205444	0,131639138	717,6298828	0,693984389	717,6307373	0,38766849	717,6307373	0,305599362	717,6307373	0,494670391	717,6298828	0,316140443	717,6205444	0,317579865	717,6205444	0,124147281	717,6205444	0,222741812
717,6556396	0,151273623	717,6547852	0,335174739	717,6454468	0,189385518	717,6454468	0,131414354	717,6547852	0,51207	717,6556396	0,308622599	717,6556396	0,25709787	717,6556396	0,382766664	717,6547852	0,263742268	717,6454468	0,236929253	717,6454468	0,115861535	717,6454468	0,178454831
717,680542	0,115353972	717,6796875	0,196852177	717,6703491	0,152970478	717,6703491	0,135963321	717,6796875	0,324083626	717,680542	0,204192832	717,680542	0,185680062	717,680542	0,262210906	717,6796875	0,147335172	717,6703491	0,181844786	717,6703491	0,128575623	717,6703491	0,159239054
717,7055054	0,077273913	717,7045898	0,165730134	717,6952515	0,093912512	717,6952515	0,077471435	717,7045898	0,258701503	717,7055054	0,128271729	717,7055054	0,115221851	717,7055054	0,17143105	717,7045898	0,143207923	717,6952515	0,108188294	717,6952515	0,07696069	717,6952515	0,08802364
717,7304077	0,090512015	717,7294922	0,18207109	717,7201538	0,105580442	717,7201538	0,091025114	717,7294922	0,227888882	717,7304077	0,135104448	717,7304077	0,112690911	717,7304077	0,16481261	717,7294922	0,163968906	717,7201538	0,107914291	717,7201538	0,075716138	717,7201538	0,089678936
717,7553101	0,122876354	717,7543945	0,134173438	717,7450562	0,10975188	717,7450562	0,112563156	717,7543945	0,166180879	717,7553101	0,126911968	717,7553101	0,134168938	717,7553101	0,150311396	717,7543945	0,114955485	717,7450562	0,11505305	717,7450562	0,106785998	717,7450562	0,113609366
717,7802124	0,070687264	717,7792969	0,093586095	717,7699585	0,07503134	717,7699585	0,071055703	717,7792969	0,127446011	717,7802124	0,073863074	717,7802124	0,08151947	717,7802124	0,097107999	717,7792969	0,082113117	717,7699585	0,085471816	717,7699585	0,077518903	717,7699585	0,079704583
717,8051147	0,066316582	717,8041992	0,122044727	717,7948608	0,061304133	717,7948608	0,048178282	717,8041992	0,141272813	717,8051147	0,082577057	717,8051147	0,076133609	717,8051147	0,097628728	717,8041992	0,115430281	717,7948608	0,063247308	717,7948608	0,047688156	717,7948608	0,05522028
717,8300171	0,099608921	717,8291016	0,124580204	717,8197632	0,079928257	717,8197632	0,079710245	717,8291016	0,128307626	717,8300171	0,099478297	717,8300171	0,107619897	717,8300171	0,116245814	717,8291016	0,115956053	717,8197632	0,081676044	717,8197632	0,074868292	717,8197632	0,08092995
717,8549194	0,063097224	717,8540039	0,076125681	717,8446655	0,073046125	717,8446655	0,07938005	717,8540039	0,084110223	717,8549194	0,057497896	717,8549194	0,070046432	717,8549194	0,073657043	717,8540039	0,068680055	717,8446655	0,07564041	717,8446655	0,086124294	717,8446655	0,08197622
717,8798218	0,057455942	717,8789063	0,105059072	717,8695679	0,047805127	717,8695679	0,044650812	717,8789063	0,109642528	717,8798218	0,059154067	717,8798218	0,057600506	717,8798218	0,068083853	717,8789063	0,103301845	717,8695679	0,050422464	717,8695679	0,044948839	717,8695679	0,044226676
717,9047241	0,098198481	717,9038086	0,123718381	717,8944702	0,073627777	717,8944702	0,075601384	717,9038086	0,113085136	717,9047241	0,084697366	717,9047241	0,098534144	717,9047241	0,096435033	717,9038086	0,122703791	717,8944702	0,071755342	717,8944702	0,068816163	717,8944702	0,068318196
717,9296265	0,086943746	717,9287109	0,078375831	717,9193726	0,072070904	717,9193726	0,090078332	717,9287109	0,07339146	717,9296265	0,059081204	717,9296265	0,079605147	717,9296265	0,072349712	717,9287109	0,080738701	717,9193726	0,074082553	717,9193726	0,093399324	717,9193726	0,080945842
717,9545288	0,082233906	717,9536133	0,106769286	717,9442749	0,048528116	717,9442749	0,057426732	717,9536133	0,097817712	717,9545288	0,053805225	717,9545288	0,060795877	717,9545288	0,066922307	717,9536133	0,124081865	717,9442749	0,046079129	717,9442749	0,055924453	717,9442749	0,046681236
717,9794312	0,158591971	717,9785156	0,142690644	717,9691772	0,078685507	717,9691772	0,102421053	717,9785156	0,116755165	717,9794312	0,091250464	717,9794312	0,10933724	717,9794312	0,102013811	717,9785156	0,17285569	717,9691772	0,066453248	717,9691772	0,084269814	717,9691772	0,070767581
718,0043335	0,207684189	718,003418	0,102233581	717,9940796	0,093848445	717,9940796	0,158505484	718,003418	0,076949567	718,0043335	0,077709295	718,0043335	0,119830444	718,0043335	0,092270263	718,003418	0,149901465	717,9940796	0,082332157	717,9940796	0,137448162	717,9940796	0,099615514
718,0292358	0,286414564	718,0283203	0,135992959	718,0189819	0,07997302	718,0189819	0,168143377	718,0283203	0,10506282	718,0292358	0,08206211	718,0292358	0,126150608	718,0292358	0,091328658	718,0283203	0,216932178	718,0189819	0,059758559	718,0189819	0,120881729	718,0189819	0,07546483
718,0541382	0,445745885	718,0532227	0,199457526	718,0438843	0,139395431	718,0438843	0,246588066	718,0532227	0,143730953	718,0541382	0,14842248	718,0541382	0,23476091	718,0541382	0,153197244	718,0532227	0,293063909	718,0438843	0,094171792	718,0438843	0,162951529	718,0438843	0,119488001
718,0790405	0,476040602	718,078186	0,151355147	718,0687866	0,190599471	718,0687866	0,292855591	718,078186	0,110806361	718,0790405	0,182317033	718,0790405	0,302826732	718,0790405	0,184984267	718,078186	0,226030856	718,0687866	0,13801904	718,0687866	0,219186008	718,0687866	0,184415191
718,1039429	0,392139733	718,1030884	0,149922714	718,093689	0,168276429	718,093689	0,226823851	718,1030884	0,127321631	718,1039429	0,185963079	718,1039429	0,290068179	718,1039429	0,176480159	718,1030884	0,21385178	718,093689	0,126002073	718,093689	0,165636525	718,093689	0,154296845
718,1288452	0,364656985	718,1279907	0,186641768	718,1185913	0,182740897	718,1185913	0,216871262	718,1279907	0,161065847	718,1288452	0,241597056	718,1288452	0,326540649	718,1288452	0,212499723	718,1279907	0,242084742	718,1185913	0,145003736	718,1185913	0,156826571	718,1185913	0,162506327
718,1537476	0,350809097	718,1528931	0,131934211	718,1435547	0,200622171	718,1435547	0,230058432	718,1528931	0,114781342	718,1537476	0,279785097	718,1537476	0,347184181	718,1537476	0,246146485	718,1528931	0,167713314	718,1435547	0,176239416	718,1435547	0,187262133	718,1435547	0,197675303
718,1786499	0,267845035	718,1777954	0,110287562	718,168457	0,157429248	718,168457	0,169298321	718,1777954	0,10161978	718,1786499	0,216939494	718,1786499	0,268449306	718,1786499	0,190944016	718,1777954	0,13578862	718,168457	0,148187116	718,168457	0,149506196	718,168457	0,159119219
718,2035522	0,215430036	718,2026978	0,136452779	718,1933594	0,132823601	718,1933594	0,120748051	718,2026978	0,124420404	718,2035522	0,196482018	718,2035522	0,221280113	718,2035522	0,167046323	718,2026978	0,164091662	718,1933594	0,124258392	718,1933594	0,097796857	718,1933594	0,117809854
718,2284546	0,23260583	718,2276001	0,149276599	718,2182617	0,136763096	718,2182617	0,142446801	718,2276001	0,127891734	718,2284546	0,200979576	718,2284546	0,24045527	718,2284546	0,183339536	718,2276001	0,173952579	718,2182617	0,13549754	718,2182617	0,114812188	718,2182617	0,132060364
718,2533569	0,181299299	718,2525024	0,101376526	718,2431641	0,12493185	718,2431641	0,145024851	718,2525024	0,084697567	718,2533569	0,142416209	718,2533569	0,183695003	718,2533569	0,137805328	718,2525024	0,118376628	718,2431641	0,123811565	718,2431641	0,137699649	718,2431641	0,134291306
718,2782593	0,135974109	718,2774048	0,13789922	718,2680664	0,091819867	718,2680664	0,109670319	718,2774048	0,113604173	718,2782593	0,121107563	718,2782593	0,133807927	718,2782593	0,115273602	718,2774048	0,163690552	718,2680664	0,085327141	718,2680664	0,100971997	718,2680664	0,086670041
718,3031616	0,185356483	718,3023071	0,183878601	718,2929688	0,131209329	718,2929688	0,169090271	718,3023071	0,139104709	718,3031616	0,145691887	718,3031616	0,166528583	718,3031616	0,144970939	718,3023071	0,223365188	718,2929688	0,108860418	718,2929688	0,138540223	718,2929688	0,123560421
718,328064	0,182539329	718,3272095	0,173083648	718,3178711	0,155957013	718,3178711	0,215591371	718,3272095	0,113521248	718,328064	0,118726127	718,328064	0,152684867	718,328064	0,128908947	718,3272095	0,229108378	718,3178711	0,133384466	718,3178711	0,196560562	718,3178711	0,16058597
718,3529663	0,187908888	718,3521118	0,290634632	718,3427734	0,15019159	718,3427734	0,218468949	718,3521118	0,171570316	718,3529663	0,101915985	718,3529663	0,130562186	718,3529663	0,119488515	718,3521118	0,405405283	718,3427734	0,115891106	718,3427734	0,198872969	718,3427734	0,139719501
718,3778687	0,303791136	718,3770142	0,529762626	718,3676758	0,227078021	718,3676758	0,344477177	718,3770142	0,27705878	718,3778687	0,152230948	718,3778687	0,206858173	718,3778687	0,182762921	718,3770142	0,709862947	718,3676758	0,167656258	718,3676758	0,301884592	718,3676758	0,203085721
718,402771	0,399053127	718,4019165	0,775457799	718,3925781	0,333562404	718,3925781	0,532599926	718,4019165	0,381363004	718,402771	0,176224142	718,402771	0,281200171	718,402771	0,242378309	718,4019165	0,996252358	718,3925781	0,248233303	718,3925781	0,479728758	718,3925781	0,312019885
718,4276733	0,481008321	718,4268188	1,14548111	718,4174805	0,436409742	718,4174805	0,643237293	718,4268188	0,630788267	718,4276733	0,218882605	718,4276733	0,351190746	718,4276733	0,333671451	718,4268188	1,35533762	718,4174805	0,311614484	718,4174805	0,578065038	718,4174805	0,383250535
718,4526367	0,626940966	718,4517212	1,515172958	718,4423828	0,623426795	718,4423828	0,786514163	718,4517212	0,962364435	718,4526367	0,350854814	718,4526367	0,521716118	718,4526367	0,539798915	718,4517212	1,644316316	718,4423828	0,463872343	718,4423828	0,685138226	718,4423828	0,534783483
718,4775391	0,699647486	718,4766235	1,623934746	718,4672852	0,791134238	718,4672852	0,86152041	718,4766235	1,182822824	718,4775391	0,460078716	718,4775391	0,669895887	718,4775391	0,730619788	718,4766235	1,599944711	718,4672852	0,648450434	718,4672852	0,766354084	718,4672852	0,705468297
718,5024414	0,605136812	718,5015259	1,537599921	718,4921875	0,804334641	718,4921875	0,707367361	718,5015259	1,338407278	718,5024414	0,547050476	718,5024414	0,712476909	718,5024414	0,854078174	718,5015259	1,365601182	718,4921875	0,724369287	718,4921875	0,631671369	718,4921875	0,716673136
718,5273438	0,534999728	718,5264282	1,343765974	718,5170898	0,736883819	718,5170898	0,510016561	718,5264282	1,380952835	718,5273438	0,622421682	718,5273438	0,747256696	718,5273438	0,940285265	718,5264282	1,087287426	718,5170898	0,745342195	718,5170898	0,46108073	718,5170898	0,656707108
718,5522461	0,47221303	718,5513306	0,979835927	718,5419922	0,60690707	718,5419922	0,384458154	718,5513306	1,190786004	718,5522461	0,667760551	718,5522461	0,737324774	718,5522461	0,956199884	718,5513306	0,732833803	718,5419922	0,69642663	718,5419922	0,363934636	718,5419922	0,572361469
718,5771484	0,313302636	718,5762329	0,70888418	718,5668945	0,399367869	718,5668945	0,229066581	718,5762329	0,984264076	718,5771484	0,589006484	718,5771484	0,583038926	718,5771484	0,816892982	718,5762329	0,498740017	718,5668945	0,516000271	718,5668945	0,225820228	718,5668945	0,392371178
718,6020508	0,187714756	718,6011353	0,574015558	718,5917969	0,267608643	718,5917969	0,140015587	718,6011353	0,8339926	718,6020508	0,470848322	718,6020508	0,411052644	718,6020508	0,626384616	718,6011353	0,409137934	718,5917969	0,371942848	718,5917969	0,135042578	718,5917969	0,257808387
718,6269531	0,177592665	718,6260376	0,427050203	718,6166992	0,229537725	718,6166992	0,143729016	718,6260376	0,633187532	718,6269531	0,384062737	718,6269531	0,331635892	718,6269531	0,490470082	718,6260376	0,314897835	718,6166992	0,308193773	718,6166992	0,136076525	718,6166992	0,222621292
718,6518555	0,127986059	718,6509399	0,250501066	718,6416016	0,168410406	718,6416016	0,134319201	718,6509399	0,412176222	718,6518555	0,254638582	718,6518555	0,224052414	718,6518555	0,333884478	718,6509399	0,171260998	718,6416016	0,221746325	718,6416016	0,137376606	718,6416016	0,17951788
718,6767578	0,081186466	718,6758423	0,193849057	718,6665039	0,09650676	718,6665039	0,074124545	718,6758423	0,314151466	718,6767578	0,166508511	718,6767578	0,133467823	718,6767578	0,215399593	718,6758423	0,149725571	718,6665039	0,127446964	718,6665039	0,073833339	718,6665039	0,097148262
718,7016602	0,107872732	718,7007446	0,19142063	718,6914063	0,100531049	718,6914063	0,089781292	718,7007446	0,259672821	718,7016602	0,15467146	718,7016602	0,140129492	718,7016602	0,189745858	718,7007446	0,16523172	718,6914063	0,113680549	718,6914063	0,077755325	718,6914063	0,095907271
718,7265625	0,095943771	718,725647	0,115004741	718,7163086	0,106272228	718,7163086	0,107256971	718,725647	0,157167256	718,7265625	0,108120009	718,7265625	0,123540327	718,7265625	0,145760655	718,725647	0,090375334	718,7163086	0,117065921	718,7163086	0,107084252	718,7163086	0,115450695
718,7514648	0,058965318	718,7505493	0,100715525	718,741272	0,063990578	718,741272	0,054567087	718,7505493	0,135464787	718,7514648	0,07367982	718,7514648	0,070791982	718,7514648	0,094934918	718,7505493	0,086753301	718,741272	0,07098671	718,741272	0,05665816	718,741272	0,0619529
718,7763672	0,078060329	718,7755127	0,135027617	718,7661743	0,069062114	718,7661743	0,061938301	718,7755127	0,149892032	718,7763672	0,095416546	718,7763672	0,092405036	718,7763672	0,111119986	718,7755127	0,125972942	718,7661743	0,071619444	718,7661743	0,051486567	718,7661743	0,060649302
718,8012695	0,08572951	718,800415	0,085944563	718,7910767	0,086448051	718,7910767	0,091643222	718,800415	0,095424928	718,8012695	0,074391268	718,8012695	0,089506283	718,8012695	0,099411331	718,800415	0,074426875	718,7910767	0,089050718	718,7910767	0,089625947	718,7910767	0,091853991
718,8261719	0,046718102	718,8253174	0,069670625	718,815979	0,050650407	718,815979	0,050610688	718,8253174	0,08236479	718,8261719	0,045792345	718,8261719	0,052836776	718,8261719	0,061580185	718,8253174	0,064357065	718,815979	0,054524347	718,815979	0,05457738	718,815979	0,050910246
718,8510742	0,06821999	718,8502197	0,114076093	718,8408813	0,052166313	718,8408813	0,047630265	718,8502197	0,113614127	718,8510742	0,070290506	718,8510742	0,07448978	718,8510742	0,083561346	718,8502197	0,109824233	718,8408813	0,047096115	718,8408813	0,042388599	718,8408813	0,041583885
718,8759766	0,086118072	718,8751221	0,085725613	718,8657837	0,07464914	718,8657837	0,083765209	718,8751221	0,084354982	718,8759766	0,065668792	718,8759766	0,083660536	718,8759766	0,08158125	718,8751221	0,077052243	718,8657837	0,073005207	718,8657837	0,085830115	718,8657837	0,079090498
718,9008789	0,052828796	718,9000244	0,060133439	718,890686	0,049770258	718,890686	0,056903161	718,9000244	0,064989418	718,9008789	0,039450359	718,9008789	0,05068066	718,9008789	0,055109598	718,9000244	0,059371609	718,890686	0,054626543	718,890686	0,065488428	718,890686	0,056394123
718,9257813	0,072057739	718,9249268	0,107879415	718,9155884	0,045607928	718,9155884	0,04910532	718,9249268	0,099108987	718,9257813	0,060899738	718,9257813	0,060894623	718,9257813	0,068582647	718,9249268	0,121639229	718,9155884	0,04304187	718,9155884	0,045122109	718,9155884	0,040077228
718,9506836	0,11009758	718,9498291	0,107155919	718,9404907	0,07693854	718,9404907	0,106344983	718,9498291	0,082112603	718,9506836	0,077258185	718,9506836	0,087583713	718,9506836	0,088389039	718,9498291	0,135395989	718,9404907	0,072344542	718,9404907	0,095927149	718,9404907	0,078698672
718,9755859	0,155333504	718,9747314	0,090975508	718,9653931	0,069332778	718,9653931	0,123814419	718,9747314	0,06405884	718,9755859	0,060545854	718,9755859	0,088673867	718,9755859	0,075037435	718,9747314	0,168136731	718,9653931	0,06206267	718,9653931	0,115012795	718,9653931	0,074618049
719,0004883	0,25661689	718,9996338	0,157366201	718,9902954	0,060880922	718,9902954	0,13445276	718,9996338	0,105355307	719,0004883	0,057209507	719,0004883	0,091150828	719,0004883	0,069399901	718,9996338	0,294444293	718,9902954	0,045948964	718,9902954	0,095984839	718,9902954	0,055165075
719,0253906	0,553289413	719,0245361	0,229118571	719,0151978	0,114131555	719,0151978	0,25332123	719,0245361	0,136695415	719,0253906	0,117060311	719,0253906	0,213476717	719,0253906	0,131225109	719,0245361	0,428803056	719,0151978	0,076909378	719,0151978	0,1705475	719,0151978	0,098196484
719,050293	0,86521101	719,0494385	0,241963446	719,0401001	0,188953623	719,0401001	0,420048535	719,0494385	0,12660706	719,050293	0,178819671	719,050293	0,363005877	719,050293	0,185585514	719,0494385	0,488679141	719,0401001	0,125314221	719,0401001	0,299830198	719,0401001	0,17887105
719,0751953	1,047241092	719,0743408	0,291604251	719,0650024	0,223887354	719,0650024	0,456685781	719,0743408	0,176613078	719,0751953	0,265107095	719,0751953	0,509550333	719,0751953	0,250342518	719,0743408	0,535006344	719,0650024	0,135172129	719,0650024	0,317367375	719,0650024	0,198814034
719,1000977	1,042293787	719,0992432	0,350734234	719,0899048	0,30236885	719,0899048	0,444489509	719,0992432	0,247080445	719,1000977	0,441795737	719,1000977	0,729084253	719,1000977	0,396689594	719,0992432	0,52661109	719,0899048	0,198982239	719,0899048	0,315954983	719,0899048	0,270051897
719,125	0,833527982	719,1241455	0,261498392	719,1148071	0,344794124	719,1148071	0,408774287	719,1241455	0,212761983	719,125	0,546445668	719,125	0,801154494	719,125	0,475185513	719,1241455	0,368256539	719,1148071	0,27473864	719,1148071	0,312725216	719,1148071	0,330128461
719,1499023	0,551437199	719,1490479	0,196560666	719,1397095	0,27097106	719,1397095	0,27824679	719,1490479	0,191878766	719,1499023	0,54208535	719,1499023	0,663204968	719,1499023	0,436976165	719,1490479	0,263749361	719,1397095	0,245378807	719,1397095	0,218805686	719,1397095	0,259276956
719,1748657	0,427032828	719,1739502	0,20703125	719,1646118	0,223756865	719,1646118	0,199948817	719,1739502	0,209538311	719,1748657	0,506832957	719,1748657	0,539699495	719,1748657	0,409417897	719,1739502	0,260505021	719,1646118	0,217149645	719,1646118	0,155614302	719,1646118	0,203258157
719,1997681	0,338941991	719,1988525	0,14575766	719,1895142	0,207742795	719,1895142	0,200290188	719,1988525	0,146803185	719,1997681	0,399068475	719,1997681	0,433251739	719,1997681	0,328285575	719,1988525	0,179767385	719,1895142	0,217574775	719,1895142	0,167903662	719,1895142	0,209486589
719,2246704	0,219603464	719,2237549	0,100046411	719,2144165	0,141504839	719,2144165	0,137489364	719,2237549	0,109408267	719,2246704	0,273511171	719,2246704	0,280256033	719,2246704	0,217448011	719,2237549	0,128317833	719,2144165	0,153435603	719,2144165	0,126052067	719,2144165	0,144540802
719,2495728	0,20692417	719,2486572	0,142261103	719,2393188	0,109803975	719,2393188	0,110265605	719,2486572	0,137686208	719,2495728	0,244015917	719,2495728	0,241959095	719,2495728	0,19919619	719,2486572	0,172821149	719,2393188	0,111206621	719,2393188	0,090001829	719,2393188	0,101837441
719,2744751	0,207077608	719,2735596	0,130661517	719,2642212	0,134070978	719,2642212	0,160014793	719,2735596	0,111432776	719,2744751	0,198165134	719,2744751	0,222350195	719,2744751	0,177045479	719,2735596	0,160259366	719,2642212	0,130616784	719,2642212	0,140840337	719,2642212	0,137172446
719,2993774	0,147365212	719,2984619	0,113956943	719,2891235	0,116547853	719,2891235	0,143993661	719,2984619	0,085514158	719,2993774	0,124001689	719,2993774	0,144193843	719,2993774	0,114717118	719,2984619	0,154312938	719,2891235	0,109975308	719,2891235	0,142300367	719,2891235	0,123643421
719,3242798	0,162057355	719,3233643	0,211137086	719,3140259	0,110846229	719,3140259	0,144815981	719,3233643	0,136970744	719,3242798	0,127572194	719,3242798	0,139880121	719,3242798	0,123842411	719,3233643	0,295762688	719,3140259	0,089840166	719,3140259	0,126917765	719,3140259	0,098308928
719,3491821	0,205728173	719,3482666	0,343350798	719,3389893	0,169559181	719,3389893	0,263031334	719,3482666	0,177731499	719,3491821	0,14444308	719,3491821	0,176162094	719,3491821	0,142923743	719,3482666	0,471657544	719,3389893	0,137437344	719,3389893	0,236910731	719,3389893	0,162788883
719,3740845	0,264333874	719,3731689	0,509381771	719,3638916	0,225191772	719,3638916	0,374238819	719,3731689	0,240377769	719,3740845	0,131570339	719,3740845	0,193910554	719,3740845	0,155006737	719,3731689	0,677169979	719,3638916	0,169977963	719,3638916	0,350227028	719,3638916	0,216025174
719,3989868	0,305104047	719,3980713	0,748041332	719,3887939	0,265986949	719,3887939	0,432120442	719,3980713	0,384014279	719,3989868	0,135042489	719,3989868	0,198346242	719,3989868	0,175773785	719,3980713	0,923259377	719,3887939	0,189038932	719,3887939	0,396311641	719,3887939	0,236761734
719,4238892	0,438248545	719,4229736	1,011934996	719,4136963	0,393586695	719,4136963	0,556623042	719,4229736	0,575169444	719,4238892	0,220836625	719,4238892	0,321282089	719,4238892	0,302031964	719,4229736	1,156525731	719,4136963	0,286211401	719,4136963	0,497835129	719,4136963	0,338838339
719,4487915	0,512100458	719,447876	1,18964982	719,4385986	0,553850472	719,4385986	0,685350776	719,447876	0,761483371	719,4487915	0,284097075	719,4487915	0,441547692	719,4487915	0,43809098	719,447876	1,255370855	719,4385986	0,445085287	719,4385986	0,622941792	719,4385986	0,506520629
719,4736938	0,491267771	719,4728394	1,265195966	719,463501	0,606584787	719,463501	0,637136221	719,4728394	0,958713174	719,4736938	0,347267002	719,4736938	0,486056685	719,4736938	0,55940938	719,4728394	1,229668975	719,463501	0,532040536	719,463501	0,577257812	719,463501	0,549136758
719,4985962	0,502399206	719,4977417	1,271067858	719,4884033	0,625299335	719,4884033	0,545361578	719,4977417	1,110049963	719,4985962	0,47135368	719,4985962	0,575776696	719,4985962	0,70971632	719,4977417	1,140761614	719,4884033	0,603648186	719,4884033	0,490617216	719,4884033	0,562189341
719,5234985	0,437485725	719,522644	1,050856948	719,5133057	0,604202867	719,5133057	0,463164419	719,522644	1,063881159	719,5234985	0,517939806	719,5234985	0,599045575	719,5234985	0,764261544	719,522644	0,858681381	719,5133057	0,637172818	719,5133057	0,433657914	719,5133057	0,566619217
719,5484009	0,290762305	719,5475464	0,777775049	719,538208	0,455839425	719,538208	0,294747084	719,5475464	0,927191436	719,5484009	0,465397596	719,5484009	0,494403511	719,5484009	0,688958228	719,5475464	0,583573461	719,538208	0,535698771	719,538208	0,289532095	719,538208	0,435073406
719,5733032	0,228668422	719,5724487	0,616247118	719,5631104	0,315792054	719,5631104	0,177490219	719,5724487	0,802716792	719,5733032	0,449599206	719,5733032	0,406095803	719,5733032	0,612064242	719,5724487	0,454304576	719,5631104	0,404537946	719,5631104	0,172306761	719,5631104	0,297057688
719,5982056	0,189490557	719,5973511	0,418907821	719,5880127	0,246048495	719,5880127	0,168653011	719,5973511	0,600768507	719,5982056	0,369631022	719,5982056	0,335999936	719,5982056	0,489864677	719,5973511	0,296567321	719,5880127	0,324055701	719,5880127	0,163619906	719,5880127	0,247654647
719,6231079	0,103325091	719,6222534	0,252044767	719,612915	0,161376178	719,612915	0,113628656	719,6222534	0,412077427	719,6231079	0,237253875	719,6231079	0,204933062	719,6231079	0,317009479	719,6222534	0,163381919	719,612915	0,217481464	719,612915	0,122051522	719,612915	0,165601552
719,6480103	0,091381148	719,6471558	0,221287355	719,6378174	0,099108003	719,6378174	0,07042601	719,6471558	0,33141014	719,6480103	0,192962244	719,6480103	0,159263551	719,6480103	0,247147918	719,6471558	0,163929731	719,6378174	0,133558437	719,6378174	0,068770885	719,6378174	0,095582984
719,6729126	0,113961339	719,6720581	0,169880062	719,6627197	0,111088194	719,6627197	0,108611889	719,6720581	0,241316855	719,6729126	0,161959246	719,6729126	0,154815704	719,6729126	0,20042479	719,6720581	0,136504829	719,6627197	0,125114173	719,6627197	0,096658923	719,6627197	0,112090699
719,6978149	0,069326945	719,6969604	0,093663238	719,6876221	0,092384987	719,6876221	0,095196605	719,6969604	0,148891628	719,6978149	0,085126117	719,6978149	0,087459974	719,6978149	0,115398116	719,6969604	0,075384714	719,6876221	0,101859115	719,6876221	0,093443312	719,6876221	0,097096816
719,7227173	0,069251128	719,7218628	0,116830967	719,7125244	0,065090679	719,7125244	0,054201953	719,7218628	0,150688529	719,7227173	0,082343608	719,7227173	0,077463262	719,7227173	0,100738056	719,7218628	0,103420518	719,7125244	0,068884268	719,7125244	0,046075974	719,7125244	0,055876561
719,7476196	0,08926513	719,7467651	0,114672698	719,7374268	0,084293604	719,7374268	0,080973543	719,7467651	0,128661349	719,7476196	0,093728974	719,7476196	0,090569034	719,7476196	0,110642172	719,7467651	0,09977904	719,7374268	0,086183496	719,7374268	0,07276684	719,7374268	0,080473483
719,772522	0,087624356	719,7716675	0,06372267	719,7623291	0,072527885	719,7623291	0,071155325	719,7716675	0,077138856	719,772522	0,076061785	719,772522	0,090039261	719,772522	0,096696183	719,7716675	0,051944718	719,7623291	0,077758729	719,7623291	0,080029875	719,7623291	0,077437796
719,7974243	0,047559068	719,7965698	0,071831264	719,7872314	0,051333401	719,7872314	0,044554763	719,7965698	0,086687848	719,7974243	0,046078622	719,7974243	0,050358452	719,7974243	0,059150394	719,7965698	0,064996459	719,7872314	0,053404514	719,7872314	0,04716051	719,7872314	0,04745343
719,8223267	0,067776024	719,8214722	0,100693852	719,8121338	0,046401486	719,8121338	0,042209715	719,8214722	0,104114771	719,8223267	0,071184337	719,8223267	0,069410481	719,8223267	0,079249442	719,8214722	0,096917413	719,8121338	0,047741499	719,8121338	0,036180239	719,8121338	0,039607566
719,847229	0,081969522	719,8463745	0,0744785	719,8370361	0,070859149	719,8370361	0,07630527	719,8463745	0,07152839	719,847229	0,062370867	719,847229	0,078955017	719,847229	0,078284979	719,8463745	0,068897113	719,8370361	0,072373889	719,8370361	0,077619106	719,8370361	0,073918357
719,8721313	0,04753428	719,8712769	0,051658396	719,8619385	0,04685688	719,8619385	0,050741017	719,8712769	0,054351196	719,8721313	0,037314348	719,8721313	0,04328645	719,8721313	0,048278708	719,8712769	0,048467182	719,8619385	0,051210906	719,8619385	0,05873223	719,8619385	0,050395858
719,8970337	0,07260152	719,8961792	0,091811411	719,8868408	0,039210737	719,8868408	0,038129993	719,8961792	0,08825732	719,8970337	0,059357718	719,8970337	0,061210293	719,8970337	0,066390447	719,8961792	0,096757956	719,8868408	0,038481411	719,8868408	0,039139539	719,8868408	0,036003459
719,9219971	0,10224288	719,9210815	0,08390557	719,9117432	0,06568864	719,9117432	0,084418803	719,9210815	0,072870225	719,9219971	0,064804286	719,9219971	0,086117104	719,9219971	0,077596143	719,9210815	0,091156498	719,9117432	0,064156093	719,9117432	0,077145778	719,9117432	0,06935519
719,9468994	0,095510818	719,9459839	0,061049432	719,9367065	0,055309001	719,9367065	0,086837605	719,9459839	0,052433144	719,9468994	0,03861906	719,9468994	0,058206227	719,9468994	0,049125373	719,9459839	0,088520624	719,9367065	0,053390559	719,9367065	0,083671205	719,9367065	0,060943637
719,9718018	0,217587426	719,9708862	0,125912845	719,9616089	0,052320559	719,9616089	0,105291553	719,9708862	0,087242708	719,9718018	0,066962533	719,9718018	0,086677134	719,9718018	0,074046075	719,9708862	0,242964536	719,9616089	0,041796897	719,9616089	0,072050326	719,9616089	0,044104982
719,9967041	0,537632525	719,9957886	0,196992829	719,9865112	0,106401213	719,9865112	0,24882102	719,9957886	0,09773469	719,9967041	0,099016927	719,9967041	0,178455874	719,9967041	0,112035155	719,9957886	0,462937981	719,9865112	0,074226163	719,9865112	0,175233603	719,9865112	0,100820243
720,0216064	1,073410988	720,0206909	0,276601732	720,0114136	0,156632453	720,0114136	0,428245991	720,0206909	0,108517051	720,0216064	0,119547442	720,0216064	0,288049519	720,0216064	0,124129102	720,0206909	0,763378501	720,0114136	0,097388104	720,0114136	0,304846346	720,0114136	0,144676596
720,0465088	1,944425941	720,0455933	0,501897037	720,0363159	0,240449697	720,0363159	0,671198547	720,0455933	0,222141743	720,0465088	0,280779094	720,0465088	0,627141476	720,0465088	0,268034846	720,0455933	1,182391286	720,0363159	0,11983978	720,0363159	0,446984917	720,0363159	0,198651835
720,0714111	2,663979292	720,0704956	0,668911695	720,0612183	0,431320429	720,0612183	0,938886464	720,0704956	0,334296733	720,0714111	0,581900418	720,0714111	1,191150665	720,0714111	0,539234281	720,0704956	1,358210444	720,0612183	0,237611309	720,0612183	0,657182574	720,0612183	0,383655578
720,0963135	2,605010509	720,0953979	0,663616598	720,0861206	0,567017496	720,0861206	0,901189625	720,0953979	0,397863716	720,0963135	0,914871812	720,0963135	1,664725542	720,0963135	0,80960691	720,0953979	1,165736914	720,0861206	0,356765062	720,0861206	0,676557362	720,0861206	0,531046867
720,1212158	2,185050964	720,1203003	0,630423188	720,1110229	0,566168725	720,1110229	0,649261534	720,1203003	0,478341699	720,1212158	1,180509806	720,1212158	1,866162062	720,1212158	1,014252663	720,1203003	0,938202024	720,1110229	0,416882336	720,1110229	0,492850453	720,1110229	0,531197429
720,1461182	1,71549499	720,1452026	0,511166334	720,1359253	0,509686768	720,1359253	0,488953173	720,1452026	0,460885495	720,1461182	1,383219719	720,1461182	1,859109402	720,1461182	1,143459558	720,1452026	0,690155745	720,1359253	0,454583257	720,1359253	0,380109549	720,1359253	0,495720029
720,1710205	1,151452899	720,170166	0,325350106	720,1608276	0,391484678	720,1608276	0,350336611	720,170166	0,347771287	720,1710205	1,34464848	720,1710205	1,538339257	720,1710205	1,090242982	720,170166	0,433738291	720,1608276	0,391194195	720,1608276	0,294463724	720,1608276	0,395914882
720,1959229	0,719873488	720,1950684	0,259017289	720,18573	0,284751922	720,18573	0,240636438	720,1950684	0,303300709	720,1959229	1,070621967	720,1959229	1,084830999	720,1959229	0,837852716	720,1950684	0,345751703	720,18573	0,296617806	720,18573	0,204051584	720,18573	0,278571993
720,2208252	0,537392676	720,2199707	0,257849038	720,2106323	0,219555855	720,2106323	0,18888621	720,2199707	0,284617275	720,2208252	0,811723769	720,2208252	0,776723564	720,2208252	0,641101897	720,2199707	0,335445374	720,2106323	0,235156968	720,2106323	0,14846994	720,2106323	0,2115556
720,2457275	0,443113089	720,244873	0,193938941	720,2355347	0,196677014	720,2355347	0,202277124	720,244873	0,205761388	720,2457275	0,584927976	720,2457275	0,577408433	720,2457275	0,473671585	720,244873	0,258446574	720,2355347	0,206149817	720,2355347	0,170241863	720,2355347	0,202093646
720,2706299	0,313394457	720,2697754	0,13352409	720,260437	0,146973446	720,260437	0,162760317	720,2697754	0,138049006	720,2706299	0,383805722	720,2706299	0,386245757	720,2706299	0,309402555	720,2697754	0,196986496	720,260437	0,151756749	720,260437	0,148512989	720,260437	0,153396159
720,2955322	0,296788186	720,2946777	0,184351876	720,2853394	0,119205281	720,2853394	0,141475022	720,2946777	0,160617441	720,2955322	0,308346868	720,2955322	0,317212731	720,2955322	0,257053226	720,2946777	0,267373621	720,2853394	0,110337459	720,2853394	0,110514268	720,2853394	0,105479784
720,3204346	0,335694194	720,3195801	0,220931157	720,3102417	0,155944705	720,3102417	0,212804124	720,3195801	0,154750541	720,3204346	0,269646823	720,3204346	0,310047269	720,3204346	0,242254183	720,3195801	0,33264944	720,3102417	0,136366591	720,3102417	0,179961935	720,3102417	0,149585739
720,3453369	0,308189064	720,3444824	0,258665711	720,335144	0,166318983	720,335144	0,259540051	720,3444824	0,143025279	720,3453369	0,199256927	720,3453369	0,246994972	720,3453369	0,187926054	720,3444824	0,413922429	720,335144	0,139285699	720,335144	0,231590495	720,335144	0,164459363
720,3702393	0,360017568	720,3693848	0,469465017	720,3600464	0,191903248	720,3600464	0,318122834	720,3693848	0,250382245	720,3702393	0,211191773	720,3702393	0,266768038	720,3702393	0,215373069	720,3693848	0,684107959	720,3600464	0,137440056	720,3600464	0,27475825	720,3600464	0,168435678
720,3951416	0,48235327	720,3942871	0,729938507	720,3849487	0,31514582	720,3849487	0,49706021	720,3942871	0,381231785	720,3951416	0,257389814	720,3951416	0,357882589	720,3951416	0,301071554	720,3942871	0,960704267	720,3849487	0,223230362	720,3849487	0,429786652	720,3849487	0,279221773
720,4200439	0,524901092	720,4191895	0,950986862	720,4098511	0,439327717	720,4098511	0,624299645	720,4191895	0,530607581	720,4200439	0,263198763	720,4200439	0,397360831	720,4200439	0,352905899	720,4191895	1,12985158	720,4098511	0,319301397	720,4098511	0,557989478	720,4098511	0,392870992
720,4449463	0,571892321	720,4440918	1,186649919	720,4347534	0,543771505	720,4347534	0,638873875	720,4440918	0,791329265	720,4449463	0,344496429	720,4449463	0,48492074	720,4449463	0,481767863	720,4440918	1,274050593	720,4347534	0,410043359	720,4347534	0,553190708	720,4347534	0,462219864
720,4698486	0,623375773	720,4689941	1,259453773	720,4596558	0,653866231	720,4596558	0,630050182	720,4689941	0,977423489	720,4698486	0,466861099	720,4698486	0,623714805	720,4698486	0,673447371	720,4689941	1,210613966	720,4596558	0,556936026	720,4596558	0,548464477	720,4596558	0,572308004
720,494751	0,516447604	720,4938965	1,100325465	720,4845581	0,627781749	720,4845581	0,513963223	720,4938965	1,014641881	720,494751	0,504963577	720,494751	0,63991648	720,494751	0,734634519	720,4938965	0,949907601	720,4845581	0,609148383	720,4845581	0,469695717	720,4845581	0,576395512
720,5196533	0,401574284	720,5187988	0,936757326	720,5094604	0,490628064	720,5094604	0,327578217	720,5187988	1,00085032	720,5196533	0,514815927	720,5196533	0,574904144	720,5196533	0,73129797	720,5187988	0,755021453	720,5094604	0,539964736	720,5094604	0,305335134	720,5094604	0,4500539
720,5445557	0,351691991	720,5437012	0,750979841	720,5344238	0,395010322	720,5344238	0,252287388	720,5437012	0,89042592	720,5445557	0,535934985	720,5445557	0,556482792	720,5445557	0,736557186	720,5437012	0,575821102	720,5344238	0,471188039	720,5344238	0,233173341	720,5344238	0,371209383
720,569458	0,283705592	720,5686035	0,495184124	720,5593262	0,287015378	720,5593262	0,191289335	720,5686035	0,67413938	720,569458	0,474630356	720,569458	0,475797743	720,569458	0,643304586	720,5686035	0,343206823	720,5593262	0,371618271	720,5593262	0,19565469	720,5593262	0,29136765
720,5943604	0,162270829	720,5935059	0,380610555	720,5842285	0,191641703	720,5842285	0,119209811	720,5935059	0,563225925	720,5943604	0,341114551	720,5943604	0,314103574	720,5943604	0,466706842	720,5935059	0,261756152	720,5842285	0,267434984	720,5842285	0,127561837	720,5842285	0,194750875
720,6192627	0,137772098	720,6184082	0,325271755	720,6091309	0,138332486	720,6091309	0,081472971	720,6184082	0,478604555	720,6192627	0,280214459	720,6192627	0,234140828	720,6192627	0,36506775	720,6184082	0,238665223	720,6091309	0,196495503	720,6091309	0,079576649	720,6091309	0,131496117
720,6442261	0,143393144	720,6433105	0,236437589	720,6340332	0,128241003	720,6340332	0,109136537	720,6433105	0,353757828	720,6442261	0,22466141	720,6442261	0,207067207	720,6442261	0,284072518	720,6433105	0,179232687	720,6340332	0,162914321	720,6340332	0,103371665	720,6340332	0,133606881
720,6691284	0,08556997	720,6682129	0,131305799	720,6589355	0,099823274	720,6589355	0,092193492	720,6682129	0,22205089	720,6691284	0,130765602	720,6691284	0,127667919	720,6691284	0,167619571	720,6682129	0,106338568	720,6589355	0,122200556	720,6589355	0,096230201	720,6589355	0,104108982
720,6940308	0,087254465	720,6931152	0,140537307	720,6838379	0,066300638	720,6838379	0,063060753	720,6931152	0,19363445	720,6940308	0,117847137	720,6940308	0,105163865	720,6940308	0,135012254	720,6931152	0,128340304	720,6838379	0,075126529	720,6838379	0,052828752	720,6838379	0,057308711
720,7189331	0,127049685	720,7180176	0,131891221	720,7087402	0,089450516	720,7087402	0,096013553	720,7180176	0,153892487	720,7189331	0,11772494	720,7189331	0,126614526	720,7189331	0,138323277	720,7180176	0,124135554	720,7087402	0,089451574	720,7087402	0,079854228	720,7087402	0,086427391
720,7438354	0,088275224	720,7429199	0,071816862	720,7336426	0,077252097	720,7336426	0,084991969	720,7429199	0,094015822	720,7438354	0,073720433	720,7438354	0,088253878	720,7438354	0,082959518	720,7429199	0,068066865	720,7336426	0,083619848	720,7336426	0,086376697	720,7336426	0,084924005
720,7687378	0,066959724	720,7678223	0,090014704	720,7585449	0,047606084	720,7585449	0,042600576	720,7678223	0,108473435	720,7687378	0,070126064	720,7687378	0,068267725	720,7687378	0,078218102	720,7678223	0,091862194	720,7585449	0,052116822	720,7585449	0,042405743	720,7585449	0,043877855
720,7936401	0,101018801	720,7927246	0,099638239	720,7834473	0,066661336	720,7834473	0,064696096	720,7927246	0,10205432	720,7936401	0,091921359	720,7936401	0,109367937	720,7936401	0,104758598	720,7927246	0,099472292	720,7834473	0,066930018	720,7834473	0,059338529	720,7834473	0,064007439
720,8185425	0,076717295	720,817627	0,051887006	720,8083496	0,062104262	720,8083496	0,070291474	720,817627	0,057561055	720,8185425	0,062501095	720,8185425	0,080715992	720,8185425	0,071795486	720,817627	0,055596907	720,8083496	0,066719115	720,8083496	0,076399937	720,8083496	0,07212007
720,8434448	0,067408733	720,8425903	0,072874539	720,833252	0,034721516	720,833252	0,035956617	720,8425903	0,075138256	720,8434448	0,054787114	720,8434448	0,057959981	720,8434448	0,057537511	720,8425903	0,080945969	720,833252	0,038903601	720,833252	0,039080836	720,833252	0,036574963
720,8683472	0,118199833	720,8674927	0,097870618	720,8581543	0,058508161	720,8581543	0,066896506	720,8674927	0,086476937	720,8683472	0,081399955	720,8683472	0,092712551	720,8683472	0,086327396	720,8674927	0,106629752	720,8581543	0,054787073	720,8581543	0,061119284	720,8581543	0,053403586
720,8932495	0,118949413	720,892395	0,055232588	720,8830566	0,064926513	720,8830566	0,089831144	720,892395	0,047518142	720,8932495	0,061145324	720,8932495	0,086808667	720,8932495	0,071377829	720,892395	0,071424134	720,8830566	0,064456433	720,8830566	0,090939	720,8830566	0,074836873
720,9181519	0,101223521	720,9172974	0,075585261	720,907959	0,040194489	720,907959	0,058853716	720,9172974	0,066187456	720,9181519	0,048823133	720,9181519	0,062780187	720,9181519	0,055285562	720,9172974	0,110096402	720,907959	0,039149646	720,907959	0,055721693	720,907959	0,040506072
720,9430542	0,159403563	720,9421997	0,130450711	720,9328613	0,068589069	720,9328613	0,113307521	720,9421997	0,092875049	720,9430542	0,072827443	720,9430542	0,094182387	720,9430542	0,07332249	720,9421997	0,213975027	720,9328613	0,055265933	720,9328613	0,082797304	720,9328613	0,061434668
720,9679565	0,312013835	720,9671021	0,13004899	720,9577637	0,100223489	720,9577637	0,228541642	720,9671021	0,079268254	720,9679565	0,098281704	720,9679565	0,151902005	720,9679565	0,105803072	720,9671021	0,28952226	720,9577637	0,080181919	720,9577637	0,172585145	720,9577637	0,107365593
720,9928589	0,577677429	720,9920044	0,16438663	720,982666	0,106066734	720,982666	0,317570895	720,9920044	0,073676489	720,9928589	0,081850417	720,9928589	0,163121566	720,9928589	0,091013961	720,9920044	0,515941083	720,982666	0,070895657	720,982666	0,219096363	720,982666	0,100196674
721,0177612	1,420390606	721,0169067	0,40867278	721,0075684	0,157736644	721,0075684	0,538995385	721,0169067	0,154950723	721,0177612	0,159099787	721,0177612	0,347964704	721,0177612	0,159785971	721,0169067	1,199138403	721,0075684	0,079384916	721,0075684	0,346451074	721,0075684	0,130531162
721,0426636	3,166018009	721,0418091	0,791622519	721,0324707	0,358744919	721,0324707	1,157240868	721,0418091	0,278666764	721,0426636	0,357090205	721,0426636	0,860830724	721,0426636	0,352805376	721,0418091	2,185346842	721,0324707	0,177234456	721,0324707	0,768795133	721,0324707	0,30452925
721,0675659	5,488589764	721,0667114	1,241521597	721,057373	0,663124084	721,057373	2,033947706	721,0667114	0,459427148	721,0675659	0,722617745	721,0675659	1,759351492	721,0675659	0,692244172	721,0667114	3,099645376	721,057373	0,319099575	721,057373	1,402622342	721,057373	0,590858102
721,0924683	7,190878868	721,0916138	1,725009322	721,0822754	1,095346093	721,0822754	2,575775146	721,0916138	0,806523025	721,0924683	1,497932076	721,0924683	3,187804699	721,0924683	1,36645937	721,0916138	3,537145853	721,0822754	0,541740477	721,0822754	1,833471298	721,0822754	0,978110313
721,1173706	6,939465046	721,1165161	1,874970555	721,1071777	1,536903858	721,1071777	2,352210045	721,1165161	1,102396965	721,1173706	2,584556818	721,1173706	4,664253235	721,1173706	2,28534317	721,1165161	3,147212029	721,1071777	0,919296741	721,1071777	1,778608322	721,1071777	1,444725871
721,1422729	5,18321991	721,1414185	1,583148837	721,1320801	1,571090817	721,1320801	1,668567896	721,1414185	1,191029072	721,1422729	3,470012188	721,1422729	5,164091587	721,1422729	2,954262495	721,1414185	2,298532724	721,1320801	1,200353861	721,1320801	1,342325091	721,1320801	1,548929811
721,1671753	3,392976999	721,1663208	1,218851447	721,1570435	1,205865502	721,1570435	1,011258721	721,1663208	1,146711111	721,1671753	3,720213413	721,1671753	4,512276649	721,1671753	3,019783258	721,1663208	1,618732214	721,1570435	1,143648386	721,1570435	0,833973706	721,1570435	1,219284058
721,1920776	2,233746052	721,1912231	0,89889735	721,1819458	0,853093863	721,1819458	0,662334323	721,1912231	0,96255827	721,1920776	3,256650925	721,1920776	3,415883064	721,1920776	2,589994192	721,1912231	1,13912487	721,1819458	0,919090927	721,1819458	0,547582924	721,1819458	0,877429962
721,21698	1,479541183	721,2161255	0,586194336	721,2068481	0,571984529	721,2068481	0,475425333	721,2161255	0,692105651	721,21698	2,407859325	721,21698	2,34650135	721,21698	1,896616697	721,2161255	0,757289529	721,2068481	0,653081059	721,2068481	0,408535719	721,2068481	0,611972511
721,2418823	1,017452598	721,2410278	0,445108593	721,2317505	0,35692367	721,2317505	0,316124946	721,2410278	0,534965932	721,2418823	1,653827429	721,2418823	1,553174973	721,2418823	1,30342865	721,2410278	0,608750463	721,2317505	0,409785688	721,2317505	0,266313136	721,2317505	0,37278232
721,2667847	0,843000174	721,2659302	0,405777365	721,2566528	0,288728803	721,2566528	0,291848063	721,2659302	0,434773535	721,2667847	1,173479915	721,2667847	1,12328589	721,2667847	0,935541868	721,2659302	0,558079898	721,2566528	0,307327032	721,2566528	0,233759135	721,2566528	0,290523916
721,291687	0,746816456	721,2908325	0,311910838	721,2815552	0,259115607	721,2815552	0,30553332	721,2908325	0,303194106	721,291687	0,911781609	721,291687	0,919540346	721,291687	0,742310643	721,2908325	0,455333829	721,2815552	0,258210003	721,2815552	0,259053022	721,2815552	0,271715373
721,3165894	0,624395192	721,3157349	0,320750713	721,3064575	0,202676728	721,3064575	0,267781496	721,3157349	0,277666718	721,3165894	0,683012068	721,3165894	0,715662897	721,3165894	0,562651694	721,3157349	0,4926202	721,3064575	0,190011382	721,3064575	0,228544682	721,3064575	0,200798422
721,3414917	0,60223788	721,3406372	0,442676425	721,3313599	0,234188974	721,3313599	0,352153748	721,3406372	0,313975066	721,3414917	0,542293906	721,3414917	0,597792029	721,3414917	0,462719232	721,3406372	0,671133637	721,3313599	0,1938072	721,3313599	0,283197939	721,3313599	0,214810535
721,366394	0,657827795	721,3655396	0,519258857	721,3562622	0,30314225	721,3562622	0,489159405	721,3655396	0,310802668	721,366394	0,487248689	721,366394	0,572844326	721,366394	0,438258708	721,3655396	0,781249642	721,3562622	0,234210715	721,3562622	0,405334651	721,3562622	0,284767985
721,3913574	0,672115803	721,3904419	0,659116507	721,3811646	0,367045462	721,3811646	0,608538806	721,3904419	0,359144419	721,3913574	0,407953411	721,3913574	0,522425532	721,3913574	0,398636103	721,3904419	0,948341787	721,3811646	0,262247235	721,3811646	0,50392586	721,3811646	0,33984831
721,4162598	0,754427016	721,4153442	1,042185068	721,4060669	0,483870715	721,4060669	0,718382299	721,4153442	0,556763887	721,4162598	0,424138457	721,4162598	0,55635345	721,4162598	0,444267303	721,4153442	1,334027529	721,4060669	0,335033029	721,4060669	0,587653697	721,4060669	0,414499104
721,4411621	0,905368745	721,4402466	1,547525406	721,4309692	0,69775188	721,4309692	0,88353765	721,4402466	0,84922719	721,4411621	0,511234581	721,4411621	0,696734846	721,4411621	0,594262242	721,4402466	1,71851933	721,4309692	0,515596151	721,4309692	0,732868969	721,4309692	0,588179469
721,4660645	0,932299793	721,4651489	2,011553049	721,4558716	0,856678545	721,4558716	0,953006864	721,4651489	1,198801756	721,4660645	0,565423906	721,4660645	0,792923808	721,4660645	0,732439399	721,4651489	1,89122653	721,4558716	0,691603005	721,4558716	0,841354787	721,4558716	0,730819464
721,4909668	0,894412577	721,4900513	2,358679295	721,4807739	0,927307904	721,4807739	0,836459458	721,4900513	1,656670094	721,4909668	0,674376488	721,4909668	0,902632654	721,4909668	0,933751285	721,4900513	1,877052069	721,4807739	0,816901863	721,4807739	0,761995375	721,4807739	0,777431011
721,5158691	0,833353281	721,5149536	2,306768179	721,5056763	0,948415518	721,5056763	0,694019556	721,5149536	1,964198947	721,5158691	0,833937109	721,5158691	1,031430364	721,5158691	1,178709626	721,5149536	1,590655327	721,5056763	0,954959929	721,5056763	0,640447915	721,5056763	0,815565467
721,5407715	0,634870112	721,539917	1,832842588	721,5305786	0,803601265	721,5305786	0,515074611	721,539917	1,914191484	721,5407715	0,858152151	721,5407715	0,975347161	721,5407715	1,238767624	721,539917	1,121351242	721,5305786	0,953086913	721,5305786	0,488491237	721,5305786	0,730976462
721,5656738	0,457035571	721,5648193	1,370107055	721,555481	0,553107798	721,555481	0,303081244	721,5648193	1,683739781	721,5656738	0,784568548	721,5656738	0,781648397	721,5656738	1,105323672	721,5648193	0,807487786	721,555481	0,752579451	721,555481	0,293364197	721,555481	0,501571119
721,5905762	0,395848036	721,5897217	0,999211788	721,5803833	0,399326533	721,5803833	0,227765664	721,5897217	1,359649062	721,5905762	0,683285952	721,5905762	0,639745474	721,5905762	0,926077425	721,5897217	0,603245318	721,5803833	0,566645265	721,5803833	0,212189972	721,5803833	0,370292544
721,6154785	0,323728979	721,614624	0,638929963	721,6052856	0,288163751	721,6052856	0,204706609	721,614624	0,966630697	721,6154785	0,521708667	721,6154785	0,492013156	721,6154785	0,685384393	721,614624	0,377663761	721,6052856	0,415355653	721,6052856	0,196245804	721,6052856	0,289869547
721,6403809	0,220328897	721,6395264	0,445837349	721,630188	0,171535552	721,630188	0,120648257	721,6395264	0,70356822	721,6403809	0,367029011	721,6403809	0,330715358	721,6403809	0,475091726	721,6395264	0,287158251	721,630188	0,256532609	721,630188	0,119496331	721,630188	0,169735044
721,6652832	0,241558328	721,6644287	0,370235384	721,6550903	0,145092577	721,6550903	0,12237829	721,6644287	0,540515006	721,6652832	0,314107567	721,6652832	0,290649921	721,6652832	0,374274492	721,6644287	0,281742334	721,6550903	0,188482016	721,6550903	0,103243209	721,6550903	0,134540156
721,6901855	0,261362791	721,6893311	0,243145287	721,6799927	0,148455232	721,6799927	0,161201909	721,6893311	0,358256429	721,6901855	0,268470675	721,6901855	0,269380182	721,6901855	0,313733667	721,6893311	0,204444841	721,6799927	0,171671882	721,6799927	0,144750446	721,6799927	0,149570227
721,7150879	0,214670196	721,7142334	0,183414251	721,704895	0,100636132	721,704895	0,111450985	721,7142334	0,256071329	721,7150879	0,189340875	721,7150879	0,205122352	721,7150879	0,222599104	721,7142334	0,171616048	721,704895	0,112661675	721,704895	0,101554021	721,704895	0,097358041
721,7399902	0,208127439	721,7391357	0,216772929	721,7297974	0,095183738	721,7297974	0,097719602	721,7391357	0,260958821	721,7399902	0,1710556	721,7399902	0,182936549	721,7399902	0,179803252	721,7391357	0,218016922	721,7297974	0,095558219	721,7297974	0,078596398	721,7297974	0,085453659
721,7648926	0,256457567	721,7640381	0,190178782	721,7547607	0,127012223	721,7547607	0,134879351	721,7640381	0,217630446	721,7648926	0,192350551	721,7648926	0,229122847	721,7648926	0,195575029	721,7640381	0,194483027	721,7547607	0,121483602	721,7547607	0,115462393	721,7547607	0,125531644
721,7897949	0,202083141	721,7889404	0,120660052	721,7796631	0,105121933	721,7796631	0,111059427	721,7889404	0,141502813	721,7897949	0,148497134	721,7897949	0,188677832	721,7897949	0,154426575	721,7889404	0,119880743	721,7796631	0,103981301	721,7796631	0,108905777	721,7796631	0,113228552
721,8146973	0,142450869	721,8138428	0,125924617	721,8045654	0,064155325	721,8045654	0,058330704	721,8138428	0,147143155	721,8146973	0,133769318	721,8146973	0,15139769	721,8146973	0,130470276	721,8138428	0,131593242	721,8045654	0,068045609	721,8045654	0,056555111	721,8045654	0,060957227
721,8395996	0,180810437	721,8387451	0,144487917	721,8294678	0,083368652	721,8294678	0,07935591	721,8387451	0,143432766	721,8395996	0,159906477	721,8395996	0,185189232	721,8395996	0,150383487	721,8387451	0,152167574	721,8294678	0,079943977	721,8294678	0,070076339	721,8294678	0,078296095
721,864502	0,155314952	721,8636475	0,085522078	721,8543701	0,080016315	721,8543701	0,098155588	721,8636475	0,087666221	721,864502	0,117575385	721,864502	0,146361649	721,864502	0,119992197	721,8636475	0,095826909	721,8543701	0,081821918	721,8543701	0,098812044	721,8543701	0,093097471
721,8894043	0,124336794	721,8885498	0,097960658	721,8792725	0,050712138	721,8792725	0,056291968	721,8885498	0,10033977	721,8894043	0,092479937	721,8894043	0,10851422	721,8894043	0,090676017	721,8885498	0,115274809	721,8792725	0,047671001	721,8792725	0,056881722	721,8792725	0,048894193
721,9143066	0,180249691	721,9134521	0,135984525	721,9041748	0,071514823	721,9041748	0,085164882	721,9134521	0,121503398	721,9143066	0,119749866	721,9143066	0,142123461	721,9143066	0,118427426	721,9134521	0,164115801	721,9041748	0,0629149	721,9041748	0,070125356	721,9041748	0,06287127
721,939209	0,202666521	721,9383545	0,092736349	721,9290771	0,085719079	721,9290771	0,132736817	721,9383545	0,07531634	721,939209	0,1044572	721,939209	0,157406032	721,939209	0,113778114	721,9383545	0,138669059	721,9290771	0,081797823	721,9290771	0,118614428	721,9290771	0,094351724
721,9641113	0,263320774	721,9632568	0,121847317	721,9539795	0,061841078	721,9539795	0,134372771	721,9632568	0,0869743	721,9641113	0,087023325	721,9641113	0,131671652	721,9641113	0,092513137	721,9632568	0,250260651	721,9539795	0,053925443	721,9539795	0,102241807	721,9539795	0,064168587
721,9890137	0,622067392	721,9881592	0,246507496	721,9788818	0,107299022	721,9788818	0,269442677	721,9881592	0,137808934	721,9890137	0,146594331	721,9890137	0,217814445	721,9890137	0,136765286	721,9881592	0,544248462	721,9788818	0,07146588	721,9788818	0,171086922	721,9788818	0,089806318
722,013916	1,264901042	722,0130615	0,341594368	722,0037842	0,205024973	722,0037842	0,559274733	722,0130615	0,14415215	722,013916	0,189737767	722,013916	0,380246133	722,013916	0,18831262	722,0130615	0,889362633	722,0037842	0,125246391	722,0037842	0,370303333	722,0037842	0,189576462
722,0388184	2,18053627	722,0379639	0,536888838	722,0286865	0,317000538	722,0286865	0,8591488	722,0379639	0,23163262	722,0388184	0,30145365	722,0388184	0,678271413	722,0388184	0,298228025	722,0379639	1,344670296	722,0286865	0,157439381	722,0286865	0,544185698	722,0286865	0,26008147
722,0637207	2,95713973	722,0628662	0,815360188	722,0535889	0,525519311	722,0535889	1,17533958	722,0628662	0,409826487	722,0637207	0,534064293	722,0637207	1,106885672	722,0637207	0,504441023	722,0628662	1,743113399	722,0535889	0,26914528	722,0535889	0,762756824	722,0535889	0,427825004
722,088623	3,511566639	722,0877686	0,92098856	722,0784912	0,755074382	722,0784912	1,331872344	722,0877686	0,514347732	722,088623	0,867090881	722,088623	1,64977026	722,088623	0,793713927	722,0877686	1,737501383	722,0784912	0,447953433	722,0784912	0,938437104	722,0784912	0,667387545
722,1135254	3,503091335	722,1126709	0,879950166	722,1033936	0,821992517	722,1033936	1,107368708	722,1126709	0,586907268	722,1135254	1,312265754	722,1135254	2,226673603	722,1135254	1,136808276	722,1126709	1,46207118	722,1033936	0,562872827	722,1033936	0,830756068	722,1033936	0,760054827
722,1384888	2,798923016	722,1375732	0,849829972	722,1282959	0,77991879	722,1282959	0,856521249	722,1375732	0,66391325	722,1384888	1,702451706	722,1384888	2,470449209	722,1384888	1,408483863	722,1375732	1,264680028	722,1282959	0,595129907	722,1282959	0,650038004	722,1282959	0,727136314
722,1633911	2,045162201	722,1624756	0,736170828	722,1531982	0,717327178	722,1531982	0,707317591	722,1624756	0,641496539	722,1633911	1,886765361	722,1633911	2,366803169	722,1633911	1,518374681	722,1624756	1,026198268	722,1531982	0,622100472	722,1531982	0,543550313	722,1531982	0,692153752
722,1882935	1,404854417	722,1873779	0,518131793	722,1781006	0,564462423	722,1781006	0,52573961	722,1873779	0,511504412	722,1882935	1,6966362	722,1882935	1,874714971	722,1882935	1,339276433	722,1873779	0,693141997	722,1781006	0,547555387	722,1781006	0,427541882	722,1781006	0,56523937
722,2131958	0,963132262	722,2122803	0,41626969	722,2030029	0,380702496	722,2030029	0,335221499	722,2122803	0,43942672	722,2131958	1,330083728	722,2131958	1,347723842	722,2131958	1,033539295	722,2122803	0,551182687	722,2030029	0,395055413	722,2030029	0,27194038	722,2030029	0,376981616
722,2380981	0,780490458	722,2372437	0,376809686	722,2279053	0,304349214	722,2279053	0,27900666	722,2372437	0,381769866	722,2380981	1,023067117	722,2380981	1,023146152	722,2380981	0,808034301	722,2372437	0,502185583	722,2279053	0,313719898	722,2279053	0,226682141	722,2279053	0,294389516
722,2630005	0,643568993	722,262146	0,268849164	722,2528076	0,25651598	722,2528076	0,27623266	722,262146	0,268058896	722,2630005	0,750241876	722,2630005	0,774349868	722,2630005	0,600691319	722,262146	0,388312936	722,2528076	0,259349823	722,2528076	0,236039564	722,2528076	0,262472451
722,2879028	0,525932789	722,2870483	0,252495408	722,27771	0,181253582	722,27771	0,207058102	722,2870483	0,236873269	722,2879028	0,548816383	722,2879028	0,566314936	722,2879028	0,436009139	722,2870483	0,374239266	722,27771	0,176579803	722,27771	0,173596755	722,27771	0,179726094
722,3128052	0,534513175	722,3119507	0,308589816	722,3026123	0,183270216	722,3026123	0,223812282	722,3119507	0,258713007	722,3128052	0,477414012	722,3128052	0,518636882	722,3128052	0,393097162	722,3119507	0,442836136	722,3026123	0,165707901	722,3026123	0,177567378	722,3026123	0,171835363
722,3377075	0,518709958	722,336853	0,291523099	722,3275146	0,211129159	722,3275146	0,297213525	722,336853	0,213120461	722,3377075	0,398120642	722,3377075	0,471134841	722,3377075	0,345981896	722,336853	0,439395487	722,3275146	0,186672568	722,3275146	0,253760338	722,3275146	0,214993671
722,3626099	0,468062013	722,3617554	0,361614704	722,352478	0,199703693	722,352478	0,307846099	722,3617554	0,230904818	722,3626099	0,324849367	722,3626099	0,393527985	722,3626099	0,291024894	722,3617554	0,543784142	722,352478	0,160386637	722,352478	0,264266253	722,352478	0,192835644
722,3875122	0,531364739	722,3866577	0,59665519	722,3773804	0,261793017	722,3773804	0,402771711	722,3866577	0,350085109	722,3875122	0,350526273	722,3875122	0,428624451	722,3875122	0,334135234	722,3866577	0,817637503	722,3773804	0,188282847	722,3773804	0,327183992	722,3773804	0,22724992
722,4124146	0,60632509	722,4115601	0,853072941	722,4022827	0,388107419	722,4022827	0,567177415	722,4115601	0,466450393	722,4124146	0,349514425	722,4124146	0,479497254	722,4124146	0,385360181	722,4115601	1,050670505	722,4022827	0,287898153	722,4022827	0,482417613	722,4022827	0,349529654
722,4373169	0,614210486	722,4364624	1,188328266	722,4271851	0,479534686	722,4271851	0,631944537	722,4364624	0,682892561	722,4373169	0,341229528	722,4373169	0,482263029	722,4373169	0,412191361	722,4364624	1,276102185	722,4271851	0,36634168	722,4271851	0,557545543	722,4271851	0,425213426
722,4622192	0,629484832	722,4613647	1,584002614	722,4520874	0,579006612	722,4520874	0,654202163	722,4613647	1,038113356	722,4622192	0,390559018	722,4622192	0,542289734	722,4622192	0,506309211	722,4613647	1,458184361	722,4520874	0,482448012	722,4520874	0,574221671	722,4520874	0,502608001
722,4871216	0,692762136	722,4862671	1,701015115	722,4769897	0,690342903	722,4769897	0,65561831	722,4862671	1,305215597	722,4871216	0,512914062	722,4871216	0,682873487	722,4871216	0,704838336	722,4862671	1,348380566	722,4769897	0,637838185	722,4769897	0,591206968	722,4769897	0,615161657
722,5120239	0,611688197	722,5111694	1,571022868	722,5018921	0,677329659	722,5018921	0,555207253	722,5111694	1,391091824	722,5120239	0,562551975	722,5120239	0,718136668	722,5120239	0,828368247	722,5111694	1,114701986	722,5018921	0,69702369	722,5018921	0,522133172	722,5018921	0,620837808
722,5369263	0,463019103	722,5360718	1,407996655	722,5267944	0,578576863	722,5267944	0,401714444	722,5360718	1,436401129	722,5369263	0,585851431	722,5369263	0,656667709	722,5369263	0,871120811	722,5360718	0,953879952	722,5267944	0,657671332	722,5267944	0,373455077	722,5267944	0,525998294
722,5618286	0,406815797	722,5609741	1,119285941	722,5516968	0,4755539	722,5516968	0,302588016	722,5609741	1,327498913	722,5618286	0,610114276	722,5618286	0,6170035	722,5618286	0,863662302	722,5609741	0,738213181	722,5516968	0,595865428	722,5516968	0,274379045	722,5516968	0,442131102
722,586731	0,30193463	722,5858765	0,751620412	722,5765991	0,359229028	722,5765991	0,239098519	722,5858765	1,036069512	722,586731	0,513334334	722,586731	0,499079853	722,586731	0,712439656	722,5858765	0,459669292	722,5765991	0,485723346	722,5765991	0,230690554	722,5765991	0,361868948
722,6116333	0,19603765	722,6107788	0,515826762	722,6015015	0,214735404	722,6015015	0,128283665	722,6107788	0,790467441	722,6116333	0,385794342	722,6116333	0,327364832	722,6116333	0,518906713	722,6107788	0,319727808	722,6015015	0,320420802	722,6015015	0,126279637	722,6015015	0,216653392
722,6365356	0,192203611	722,6356812	0,404782832	722,6264038	0,162297755	722,6264038	0,107720956	722,6356812	0,615489185	722,6365356	0,323258013	722,6365356	0,280585229	722,6365356	0,411393553	722,6356812	0,286341518	722,6264038	0,227492839	722,6264038	0,095993429	722,6264038	0,155247211
722,661438	0,174724236	722,6605835	0,251026958	722,6513062	0,146501958	722,6513062	0,133963615	722,6605835	0,402622104	722,661438	0,236996263	722,661438	0,224587649	722,661438	0,296712756	722,6605835	0,178355992	722,6513062	0,186175764	722,6513062	0,127665192	722,6513062	0,151828155
722,6863403	0,121644191	722,6854858	0,171581909	722,6762085	0,085532442	722,6762085	0,08482825	722,6854858	0,282325476	722,6863403	0,149904549	722,6863403	0,145773724	722,6863403	0,187103197	722,6854858	0,137993127	722,6762085	0,110418722	722,6762085	0,082186073	722,6762085	0,090644658
722,7112427	0,155030578	722,7103882	0,188553169	722,7011108	0,079865284	722,7011108	0,076165147	722,7103882	0,252488315	722,7112427	0,151548997	722,7112427	0,148699716	722,7112427	0,166999474	722,7103882	0,175955549	722,7011108	0,086273752	722,7011108	0,060826633	722,7011108	0,070052028
722,736145	0,162936971	722,7352905	0,132265151	722,7260132	0,104924224	722,7260132	0,109043308	722,7352905	0,172341079	722,736145	0,130704865	722,736145	0,155161142	722,736145	0,147533566	722,7352905	0,12379308	722,7260132	0,105939075	722,7260132	0,098624229	722,7260132	0,108203568
722,7610474	0,092900969	722,7601929	0,089426726	722,7509155	0,073076628	722,7509155	0,069224179	722,7601929	0,121449761	722,7610474	0,086216435	722,7610474	0,099105187	722,7610474	0,099731341	722,7601929	0,087299988	722,7509155	0,077203423	722,7509155	0,072600096	722,7509155	0,072575033
722,7859497	0,106641017	722,7850952	0,126260862	722,7758179	0,056153584	722,7758179	0,048144259	722,7850952	0,140603513	722,7859497	0,111595467	722,7859497	0,109325483	722,7859497	0,111253731	722,7850952	0,12681672	722,7758179	0,056834765	722,7758179	0,045510024	722,7758179	0,047605678
722,8108521	0,124447413	722,8099976	0,103431687	722,8007202	0,076561138	722,8007202	0,081301674	722,8099976	0,106703542	722,8108521	0,118120663	722,8108521	0,132351682	722,8108521	0,118763596	722,8099976	0,101344705	722,8007202	0,078825347	722,8007202	0,080919258	722,8007202	0,081540994
722,8357544	0,103159599	722,8348999	0,065573424	722,8256226	0,057657313	722,8256226	0,063754797	722,8348999	0,07284984	722,8357544	0,080038458	722,8357544	0,104296327	722,8357544	0,089745998	722,8348999	0,069359973	722,8256226	0,061578438	722,8256226	0,070360906	722,8256226	0,060404256
722,8607178	0,068262465	722,8598022	0,099132657	722,8505249	0,040557437	722,8505249	0,043308001	722,8598022	0,101154462	722,8607178	0,059402149	722,8607178	0,069602355	722,8607178	0,066276014	722,8598022	0,108992897	722,8505249	0,041335426	722,8505249	0,038947571	722,8505249	0,036662418
722,8856201	0,105088532	722,8847046	0,125766426	722,8754272	0,07012298	722,8754272	0,075932167	722,8847046	0,111957632	722,8856201	0,087728336	722,8856201	0,098183922	722,8856201	0,092017509	722,8847046	0,137825519	722,8754272	0,066488259	722,8754272	0,068148658	722,8754272	0,065673649
722,9105225	0,10794761	722,9096069	0,072525382	722,9003296	0,075268373	722,9003296	0,095846571	722,9096069	0,064152882	722,9105225	0,075059369	722,9105225	0,095440835	722,9105225	0,086314254	722,9096069	0,084814101	722,9003296	0,070216551	722,9003296	0,092594318	722,9003296	0,081823446
722,9354248	0,085367829	722,9345703	0,082309037	722,9252319	0,046108235	722,9252319	0,062748469	722,9345703	0,073917635	722,9354248	0,056261856	722,9354248	0,066638961	722,9354248	0,063851051	722,9345703	0,102736264	722,9252319	0,04463359	722,9252319	0,058246542	722,9252319	0,047202006
722,9603271	0,164129868	722,9594727	0,137452334	722,9501953	0,063411497	722,9501953	0,105594002	722,9594727	0,110991098	722,9603271	0,086383	722,9603271	0,108062096	722,9603271	0,093666784	722,9594727	0,203962564	722,9501953	0,054183748	722,9501953	0,077692181	722,9501953	0,057307549
722,9852295	0,313374013	722,984375	0,136940151	722,9750977	0,109614111	722,9750977	0,244685844	722,984375	0,08313375	722,9852295	0,082574748	722,9852295	0,139570862	722,9852295	0,09751188	722,984375	0,276844412	722,9750977	0,084927984	722,9750977	0,175770879	722,9750977	0,111318849
723,0101318	0,61909622	723,0092773	0,203231663	723	0,129485756	723	0,414029658	723,0092773	0,101730399	723,0101318	0,082313322	723,0101318	0,166011199	723,0101318	0,095894456	723,0092773	0,501639187	723	0,075469896	723	0,256519526	723	0,114646643
723,0350342	1,238913655	723,0341797	0,38528195	723,0249023	0,262869447	723,0249023	0,776533544	723,0341797	0,191869721	723,0350342	0,189134762	723,0350342	0,392693073	723,0350342	0,194957271	723,0341797	0,857922733	723,0249023	0,123221256	723,0249023	0,444058418	723,0249023	0,203485563
723,0599365	1,87784493	723,059082	0,478151739	723,0498047	0,512120187	723,0498047	1,156201243	723,059082	0,239894599	723,0599365	0,358311117	723,0599365	0,755570173	723,0599365	0,347626746	723,059082	1,027193904	723,0498047	0,258514702	723,0498047	0,704486191	723,0498047	0,423089355
723,0848389	2,088108063	723,0839844	0,51790607	723,074707	0,702912033	723,074707	1,139112711	723,0839844	0,305362105	723,0848389	0,594431221	723,0848389	1,114845157	723,0848389	0,528484643	723,0839844	1,016153693	723,074707	0,387908936	723,074707	0,741263807	723,074707	0,582313299
723,1097412	1,912716866	723,1088867	0,569496453	723,0996094	0,766616225	723,0996094	0,911187589	723,1088867	0,400725782	723,1097412	0,920071602	723,1097412	1,424700856	723,1097412	0,769698024	723,1088867	0,943541646	723,0996094	0,506415129	723,0996094	0,612655997	723,0996094	0,650185108
723,1346436	1,542195916	723,1337891	0,48256883	723,1245117	0,709871471	723,1245117	0,717395127	723,1337891	0,387758285	723,1346436	1,109161377	723,1346436	1,476049781	723,1346436	0,892823756	723,1337891	0,726272941	723,1245117	0,576263189	723,1245117	0,527588844	723,1245117	0,64829731
723,1595459	1,094159961	723,1586914	0,342635691	723,1494141	0,539108515	723,1494141	0,496222258	723,1586914	0,322323918	723,1595459	1,056580544	723,1595459	1,24630785	723,1595459	0,818921268	723,1586914	0,509188712	723,1494141	0,499573529	723,1494141	0,390325695	723,1494141	0,512415528
723,1844482	0,859473407	723,1835938	0,317023128	723,1743164	0,383324385	723,1743164	0,322820842	723,1835938	0,319494277	723,1844482	0,98123914	723,1844482	1,066049695	723,1844482	0,749551415	723,1835938	0,440029263	723,1743164	0,378208309	723,1743164	0,245952278	723,1743164	0,357940406
723,2093506	0,721525192	723,2084961	0,261531323	723,1992188	0,316177338	723,1992188	0,282520115	723,2084961	0,260841131	723,2093506	0,863406777	723,2093506	0,904364944	723,2093506	0,668565154	723,2084961	0,357162923	723,1992188	0,327041924	723,1992188	0,226442322	723,1992188	0,301403642
723,2342529	0,558398664	723,2333984	0,175118312	723,2241211	0,229830623	723,2241211	0,224734381	723,2333984	0,183983833	723,2342529	0,667115867	723,2342529	0,689781189	723,2342529	0,523056746	723,2333984	0,258789003	723,2241211	0,247065336	723,2241211	0,192787483	723,2241211	0,234204784
723,2591553	0,400251597	723,2583008	0,187906563	723,2490234	0,162110195	723,2490234	0,1574274	723,2583008	0,186040625	723,2591553	0,481609404	723,2591553	0,490098208	723,2591553	0,376694143	723,2583008	0,267422825	723,2490234	0,169679582	723,2490234	0,130616158	723,2490234	0,155614153
723,2840576	0,388698876	723,2832031	0,222713411	723,2739258	0,167370602	723,2739258	0,172715798	723,2832031	0,199354559	723,2840576	0,403734922	723,2840576	0,424584806	723,2840576	0,327695847	723,2832031	0,305731624	723,2739258	0,161456928	723,2739258	0,133051604	723,2739258	0,151198506
723,30896	0,366511822	723,3081055	0,177355334	723,2988281	0,178646654	723,2988281	0,223575503	723,3081055	0,144647643	723,30896	0,321604401	723,30896	0,36657241	723,30896	0,270596951	723,3081055	0,268219233	723,2988281	0,166905776	723,2988281	0,191210479	723,2988281	0,177145481
723,3338623	0,313541144	723,3330078	0,188163012	723,3237305	0,145321548	723,3237305	0,209377676	723,3330078	0,141178951	723,3338623	0,246067271	723,3338623	0,276070118	723,3338623	0,205829874	723,3330078	0,307981908	723,3237305	0,128293157	723,3237305	0,179626569	723,3237305	0,137918219
723,3587646	0,372075319	723,3579102	0,322181433	723,3486328	0,180843249	723,3486328	0,269357651	723,3579102	0,206462577	723,3587646	0,254894853	723,3587646	0,289579511	723,3587646	0,231006116	723,3579102	0,500174642	723,3486328	0,138787106	723,3486328	0,217207298	723,3486328	0,155144528
723,383667	0,459444493	723,3828125	0,451164514	723,3735352	0,278234035	723,3735352	0,440116644	723,3828125	0,236454323	723,383667	0,246749058	723,383667	0,326600581	723,383667	0,251960099	723,3828125	0,710542262	723,3735352	0,212089792	723,3735352	0,368308544	723,3735352	0,254340887
723,4085693	0,553392947	723,4077148	0,699322522	723,3984375	0,362834096	723,3984375	0,574042261	723,4077148	0,345461041	723,4085693	0,231478915	723,4085693	0,328030318	723,4085693	0,263647437	723,4077148	1,05988121	723,3984375	0,266063094	723,3984375	0,499926627	723,3984375	0,315673143
723,4334717	0,746079385	723,4326172	1,128451109	723,4233398	0,515648901	723,4233398	0,755616546	723,4326172	0,60843271	723,4334717	0,32077679	723,4334717	0,480452627	723,4334717	0,409503579	723,4326172	1,49745214	723,4233398	0,374968857	723,4233398	0,662705719	723,4233398	0,421798646
723,458374	0,895879984	723,4575195	1,43482399	723,4482422	0,743359149	723,4482422	0,926771402	723,4575195	0,879255891	723,458374	0,434246004	723,458374	0,690683007	723,458374	0,622553051	723,4575195	1,651245117	723,4482422	0,567920446	723,4482422	0,846281111	723,4482422	0,628732264
723,4832764	0,813031614	723,4824219	1,514732838	723,4731445	0,861786008	723,4731445	0,84059298	723,4824219	1,117504478	723,4832764	0,53289175	723,4832764	0,807839215	723,4832764	0,820749521	723,4824219	1,512299061	723,4731445	0,725493431	723,4731445	0,807040155	723,4731445	0,739716709
723,5081787	0,684956372	723,5073242	1,456933141	723,4980469	0,838519454	723,4980469	0,622722447	723,5073242	1,305335522	723,5081787	0,69269973	723,5081787	0,896897912	723,5081787	1,032113075	723,5073242	1,28474009	723,4980469	0,809666216	723,4980469	0,606172085	723,4980469	0,72094959
723,5330811	0,534568608	723,5322266	1,189896822	723,5229492	0,730263352	723,5229492	0,479203612	723,5322266	1,265354156	723,5330811	0,757852197	723,5330811	0,86388576	723,5330811	1,094775319	723,5322266	0,940948427	723,5229492	0,814227521	723,5229492	0,467164695	723,5229492	0,669583857
723,5579834	0,385335565	723,5571289	0,826685965	723,5479126	0,528362036	723,5479126	0,32119444	723,5571289	1,054240465	723,5579834	0,68142271	723,5579834	0,70933032	723,5579834	0,977243006	723,5571289	0,595637441	723,5479126	0,671308458	723,5479126	0,3223598	723,5479126	0,51164037
723,5828857	0,275251508	723,5820313	0,615166545	723,5728149	0,339025825	723,5728149	0,181468055	723,5820313	0,868908525	723,5828857	0,592889965	723,5828857	0,547436953	723,5828857	0,817060113	723,5820313	0,440236807	723,5728149	0,469126225	723,5728149	0,172968864	723,5728149	0,319178194
723,6078491	0,23721832	723,6069946	0,43658042	723,5977173	0,256145865	723,5977173	0,167452708	723,6069946	0,647052884	723,6078491	0,491728634	723,6078491	0,426497966	723,6078491	0,649461329	723,6069946	0,309005439	723,5977173	0,348511904	723,5977173	0,154784635	723,5977173	0,250033885
723,6327515	0,182744026	723,631897	0,283168316	723,6226196	0,201588601	723,6226196	0,161640659	723,631897	0,467502773	723,6327515	0,350247085	723,6327515	0,315576166	723,6327515	0,467248052	723,631897	0,193962574	723,6226196	0,27814132	723,6226196	0,163283452	723,6226196	0,218428701
723,6576538	0,109995544	723,6567993	0,212900415	723,647522	0,126846552	723,647522	0,098486081	723,6567993	0,365801036	723,6576538	0,224500537	723,6576538	0,1895473	723,6576538	0,29430753	723,6567993	0,15044719	723,647522	0,181239024	723,647522	0,098060794	723,647522	0,134389564
723,6825562	0,124549501	723,6817017	0,208087385	723,6724243	0,105343901	723,6724243	0,087302752	723,6817017	0,301668793	723,6825562	0,195129558	723,6825562	0,167751029	723,6825562	0,236274809	723,6817017	0,172450036	723,6724243	0,127930045	723,6724243	0,072620288	723,6724243	0,093997575
723,7074585	0,128012776	723,706604	0,140067577	723,6973267	0,122648798	723,6973267	0,128688633	723,706604	0,201148212	723,7074585	0,148848474	723,7074585	0,155044198	723,7074585	0,180568829	723,706604	0,117082663	723,6973267	0,133039236	723,6973267	0,113525271	723,6973267	0,124873705
723,7323608	0,080382735	723,7315063	0,093410507	723,722229	0,085050955	723,722229	0,085975043	723,7315063	0,135855526	723,7323608	0,090344019	723,7323608	0,091973074	723,7323608	0,112390339	723,7315063	0,08317215	723,722229	0,096037231	723,722229	0,08880648	723,722229	0,088750735
723,7572632	0,098054461	723,7564087	0,130603835	723,7471313	0,073164634	723,7471313	0,060342137	723,7564087	0,153481737	723,7572632	0,106277436	723,7572632	0,103468001	723,7572632	0,118904725	723,7564087	0,123784922	723,7471313	0,073648997	723,7471313	0,050424896	723,7471313	0,062198129
723,7821655	0,107685931	723,781311	0,107613683	723,7720337	0,093814395	723,7720337	0,093184307	723,781311	0,11647369	723,7821655	0,099605866	723,7821655	0,110874303	723,7821655	0,114385709	723,781311	0,098074563	723,7720337	0,092246316	723,7720337	0,084129058	723,7720337	0,09212096
723,8070679	0,053813715	723,8062134	0,068678059	723,796936	0,068474017	723,796936	0,06693545	723,8062134	0,081135415	723,8070679	0,060668521	723,8070679	0,064099431	723,8070679	0,072087288	723,8062134	0,063276201	723,796936	0,073730081	723,796936	0,072360002	723,796936	0,07251595
723,8319702	0,067636006	723,8311157	0,104152851	723,8218384	0,048233304	723,8218384	0,042996708	723,8311157	0,108062118	723,8319702	0,078315698	723,8319702	0,073491074	723,8319702	0,081304692	723,8311157	0,105934151	723,8218384	0,047684647	723,8218384	0,04203276	723,8218384	0,042238787
723,8568726	0,09542729	723,8560181	0,106139392	723,8467407	0,072402529	723,8467407	0,083195426	723,8560181	0,10002853	723,8568726	0,08297684	723,8568726	0,09544123	723,8568726	0,094860286	723,8560181	0,100348227	723,8467407	0,072318189	723,8467407	0,076893717	723,8467407	0,073217735
723,8817749	0,060664859	723,8809204	0,063939705	723,8716431	0,062698856	723,8716431	0,07872197	723,8809204	0,069251791	723,8817749	0,046527952	723,8817749	0,05960853	723,8817749	0,060899001	723,8809204	0,062150057	723,8716431	0,067185029	723,8716431	0,082235694	723,8716431	0,070524804
723,9066772	0,068840228	723,9058228	0,09777844	723,8965454	0,046667043	723,8965454	0,051684771	723,9058228	0,090504028	723,9066772	0,058772516	723,9066772	0,065432772	723,9066772	0,070584059	723,9058228	0,107491672	723,8965454	0,045902628	723,8965454	0,047831889	723,8965454	0,042250257
723,9315796	0,118156321	723,9307251	0,114714429	723,9214478	0,076646701	723,9214478	0,101659499	723,9307251	0,094223619	723,9315796	0,085758038	723,9315796	0,098506786	723,9315796	0,096758239	723,9307251	0,138067544	723,9214478	0,069328532	723,9214478	0,08895997	723,9214478	0,074194431
723,9564819	0,135216892	723,9556274	0,086088397	723,9463501	0,080639757	723,9463501	0,14793998	723,9556274	0,065507665	723,9564819	0,069362998	723,9564819	0,094031125	723,9564819	0,084728494	723,9556274	0,132417142	723,9463501	0,074869014	723,9463501	0,125424966	723,9463501	0,086038247
723,9813843	0,186387271	723,9805298	0,125024289	723,9712524	0,078803666	723,9712524	0,206576735	723,9805298	0,091545619	723,9813843	0,05414838	723,9813843	0,076660573	723,9813843	0,068325922	723,9805298	0,219949156	723,9712524	0,058742024	723,9712524	0,134612337	723,9712524	0,069613628
724,0062866	0,420206428	724,0054321	0,206679597	723,9961548	0,133067116	723,9961548	0,361122042	724,0054321	0,131885469	724,0062866	0,099043496	724,0062866	0,15087007	724,0062866	0,115415834	724,0054321	0,366727173	723,9961548	0,084043577	723,9961548	0,215867281	723,9961548	0,110166997
724,031189	0,756362081	724,0303345	0,241421759	724,0210571	0,224772304	724,0210571	0,582043707	724,0303345	0,135195687	724,031189	0,145506099	724,031189	0,280726582	724,031189	0,165355608	724,0303345	0,470769286	724,0210571	0,13382104	724,0210571	0,360366791	724,0210571	0,197623655
724,0560913	1,00197351	724,0552368	0,265615165	724,0459595	0,328826874	724,0459595	0,743556857	724,0552368	0,157450899	724,0560913	0,20568949	724,0560913	0,414813042	724,0560913	0,217828035	724,0552368	0,533069909	724,0459595	0,175371483	724,0459595	0,459199786	724,0459595	0,279450595
724,0809937	1,156240582	724,0801392	0,349769711	724,0708618	0,462213218	724,0708618	0,734788239	724,0801392	0,24310331	724,0809937	0,384221643	724,0809937	0,661938965	724,0809937	0,362967223	724,0801392	0,597837865	724,0708618	0,260797828	724,0708618	0,459479541	724,0708618	0,370381594
724,105896	1,064877987	724,1050415	0,323472589	724,0957642	0,546965241	724,0957642	0,656903505	724,1050415	0,243110463	724,105896	0,537046432	724,105896	0,82475096	724,105896	0,477028787	724,1050415	0,502637267	724,0957642	0,381017685	724,0957642	0,453005314	724,0957642	0,471688509
724,1307983	0,806355596	724,1299438	0,241384417	724,1206665	0,469496042	724,1206665	0,491011709	724,1299438	0,209156409	724,1307983	0,578653216	724,1307983	0,77045995	724,1307983	0,478145242	724,1299438	0,373872131	724,1206665	0,383775294	724,1206665	0,358941734	724,1206665	0,425549299
724,1557007	0,63839221	724,1548462	0,25162214	724,1456299	0,36559242	724,1456299	0,344876558	724,1548462	0,234799951	724,1557007	0,592845738	724,1557007	0,693809211	724,1557007	0,478233784	724,1548462	0,35037306	724,1456299	0,318799376	724,1456299	0,245933756	724,1456299	0,321068823
724,180603	0,520094395	724,1797485	0,211564973	724,1705322	0,322274894	724,1705322	0,29523018	724,1797485	0,203238919	724,180603	0,546943724	724,180603	0,605568886	724,180603	0,436615407	724,1797485	0,277732283	724,1705322	0,299660921	724,1705322	0,226203397	724,1705322	0,299728036
724,2055054	0,34721151	724,2046509	0,132135525	724,1954346	0,243960097	724,1954346	0,220728651	724,2046509	0,142494857	724,2055054	0,408520281	724,2055054	0,438232124	724,2055054	0,32063207	724,2046509	0,178263023	724,1954346	0,245158195	724,1954346	0,187581763	724,1954346	0,238297895
724,2304077	0,280724734	724,2295532	0,152921543	724,2203369	0,161963031	724,2203369	0,143481091	724,2295532	0,157443359	724,2304077	0,343875021	724,2304077	0,341924846	724,2304077	0,269114614	724,2295532	0,198526308	724,2203369	0,166301161	724,2203369	0,113958836	724,2203369	0,147172481
724,2553101	0,272170454	724,2544556	0,151934847	724,2452393	0,159502357	724,2452393	0,165276065	724,2544556	0,142017558	724,2553101	0,293521315	724,2553101	0,313291222	724,2553101	0,246939391	724,2544556	0,199725911	724,2452393	0,158952117	724,2452393	0,136332586	724,2452393	0,152725324
724,2802124	0,225630865	724,2793579	0,107642621	724,2701416	0,137636915	724,2701416	0,164014086	724,2793579	0,095731415	724,2802124	0,222795382	724,2802124	0,23987034	724,2802124	0,186413154	724,2793579	0,146108761	724,2701416	0,135418355	724,2701416	0,151554316	724,2701416	0,144657001
724,3051147	0,1846582	724,3043213	0,154067442	724,2950439	0,10711576	724,2950439	0,133615673	724,3043213	0,125420019	724,3051147	0,175647706	724,3051147	0,193211958	724,3051147	0,147479013	724,3043213	0,215722635	724,2950439	0,09622322	724,2950439	0,110804059	724,2950439	0,097302929
724,3300781	0,217936397	724,3292236	0,224664599	724,3199463	0,149197266	724,3199463	0,206909597	724,3292236	0,147164673	724,3300781	0,174975306	724,3300781	0,201501429	724,3300781	0,162771538	724,3292236	0,309337974	724,3199463	0,124433771	724,3199463	0,166860387	724,3199463	0,139237776
724,3549805	0,253518671	724,354126	0,255181521	724,3448486	0,182907537	724,3448486	0,286433727	724,354126	0,14008984	724,3549805	0,16116716	724,3549805	0,212928832	724,3549805	0,163818523	724,354126	0,371893972	724,3448486	0,147584185	724,3448486	0,250207871	724,3448486	0,177477852
724,3798828	0,246214405	724,3790283	0,361206293	724,369751	0,197539791	724,369751	0,327911168	724,3790283	0,178601339	724,3798828	0,128289714	724,3798828	0,174030647	724,3798828	0,14380537	724,3790283	0,524850249	724,369751	0,146042123	724,369751	0,284909993	724,369751	0,177238286
724,4047852	0,369492859	724,4039307	0,659471869	724,3946533	0,265704155	724,3946533	0,439546496	724,4039307	0,340730309	724,4047852	0,180435956	724,4047852	0,249968275	724,4047852	0,21720174	724,4039307	0,872601032	724,3946533	0,185193881	724,3946533	0,370053411	724,3946533	0,226264194
724,4296875	0,517305553	724,428833	0,933034837	724,4195557	0,435649127	724,4195557	0,648894429	724,428833	0,515741885	724,4296875	0,229786918	724,4296875	0,363634109	724,4296875	0,325480491	724,428833	1,135266066	724,4195557	0,317958385	724,4195557	0,560971022	724,4195557	0,38677597
724,4545898	0,551378369	724,4537354	1,135906219	724,444458	0,563354135	724,444458	0,713911176	724,4537354	0,717690885	724,4545898	0,271440923	724,4545898	0,438737184	724,4545898	0,429717749	724,4537354	1,249825001	724,444458	0,437743276	724,444458	0,645108879	724,444458	0,49918589
724,4794922	0,577012718	724,4786377	1,297925591	724,4693604	0,6474576	724,4693604	0,661508739	724,4786377	0,972016215	724,4794922	0,408785462	724,4794922	0,572784424	724,4794922	0,624732018	724,4786377	1,282182217	724,4693604	0,553144515	724,4693604	0,598000824	724,4693604	0,567361355
724,5043945	0,551330447	724,50354	1,228697181	724,4942627	0,698755801	724,4942627	0,59801054	724,50354	1,084999204	724,5043945	0,530240536	724,5043945	0,679797053	724,5043945	0,788741291	724,50354	1,099164605	724,4942627	0,674640477	724,4942627	0,552913487	724,4942627	0,639791846
724,5292969	0,39251104	724,5284424	0,985020697	724,519165	0,606107116	724,519165	0,443850428	724,5284424	1,031938791	724,5292969	0,536782682	724,5292969	0,597815692	724,5292969	0,79878819	724,5284424	0,803269386	724,519165	0,66830194	724,519165	0,428299278	724,519165	0,583171546
724,5541992	0,286955953	724,5533447	0,796354055	724,5440674	0,449169248	724,5440674	0,270480752	724,5533447	0,949863613	724,5541992	0,525743365	724,5541992	0,511397123	724,5541992	0,754430473	724,5533447	0,612397909	724,5440674	0,554063678	724,5440674	0,258651644	724,5440674	0,42923823
724,5791016	0,237142801	724,5782471	0,582529247	724,5689697	0,350820035	724,5689697	0,21550855	724,5782471	0,778468668	724,5791016	0,475705057	724,5791016	0,437560111	724,5791016	0,652747035	724,5782471	0,430752099	724,5689697	0,461047411	724,5689697	0,20415917	724,5689697	0,349463761
724,6040039	0,139415309	724,6031494	0,352442026	724,5938721	0,236027583	724,5938721	0,148589879	724,6031494	0,552625597	724,6040039	0,328464925	724,6040039	0,282093704	724,6040039	0,45622766	724,6031494	0,237164706	724,5938721	0,336674422	724,5938721	0,159130931	724,5938721	0,250405401
724,6289063	0,096660845	724,6280518	0,268186063	724,6187744	0,135345563	724,6187744	0,076124638	724,6280518	0,428652465	724,6289063	0,24610661	724,6289063	0,184278265	724,6289063	0,321877986	724,6280518	0,196514636	724,6187744	0,206087008	724,6187744	0,07750944	724,6187744	0,132455394
724,6538086	0,128085703	724,6529541	0,21314235	724,6436768	0,125634462	724,6436768	0,0984715	724,6529541	0,320728481	724,6538086	0,228903696	724,6538086	0,179488778	724,6538086	0,286665469	724,6529541	0,167381048	724,6436768	0,160119101	724,6436768	0,086073264	724,6436768	0,12294466
724,6787109	0,106094256	724,6778564	0,112803444	724,6685791	0,100408189	724,6685791	0,098959066	724,6778564	0,190667987	724,6787109	0,162863582	724,6787109	0,151041985	724,6787109	0,213296592	724,6778564	0,088765636	724,6685791	0,124220148	724,6685791	0,096143313	724,6685791	0,107958764
724,7036133	0,059087079	724,7027588	0,106944032	724,6934814	0,063128002	724,6934814	0,051983129	724,7027588	0,162868336	724,7036133	0,090333283	724,7036133	0,078929134	724,7036133	0,120940723	724,7027588	0,087242834	724,6934814	0,072446756	724,6934814	0,049842678	724,6934814	0,05690993
724,7285156	0,073754393	724,7276611	0,127796322	724,7183838	0,07586097	724,7183838	0,065631524	724,7276611	0,163957566	724,7285156	0,094896644	724,7285156	0,078358717	724,7285156	0,116925634	724,7276611	0,116142683	724,7183838	0,07889764	724,7183838	0,052966826	724,7183838	0,065872639
724,753418	0,081079334	724,7525635	0,099036507	724,7433472	0,085133605	724,7433472	0,080711573	724,7525635	0,11915952	724,753418	0,086513616	724,753418	0,091713451	724,753418	0,103066005	724,7525635	0,084149614	724,7433472	0,089984871	724,7433472	0,076051272	724,7433472	0,088901386
724,7783203	0,038628206	724,7774658	0,055900671	724,7682495	0,057697844	724,7682495	0,053882871	724,7774658	0,075784169	724,7783203	0,049255624	724,7783203	0,048442785	724,7783203	0,055357289	724,7774658	0,050675128	724,7682495	0,066640355	724,7682495	0,059822354	724,7682495	0,063835204
724,8032227	0,047024135	724,8023682	0,087855674	724,7931519	0,037305664	724,7931519	0,029754372	724,8023682	0,096534617	724,8032227	0,059653662	724,8032227	0,049984246	724,8032227	0,061535932	724,8023682	0,085399359	724,7931519	0,042219438	724,7931519	0,026745306	724,7931519	0,032857373
724,828125	0,06385605	724,8272705	0,086963139	724,8180542	0,060138576	724,8180542	0,058399197	724,8272705	0,085857138	724,828125	0,062696092	724,828125	0,073388465	724,828125	0,074671127	724,8272705	0,077533312	724,8180542	0,058101758	724,8180542	0,058142442	724,8180542	0,058458127
724,8530273	0,033338491	724,8521729	0,051249739	724,8429565	0,04792637	724,8429565	0,056598514	724,8521729	0,056166664	724,8530273	0,03184576	724,8530273	0,036421437	724,8530273	0,040937312	724,8521729	0,046236072	724,8429565	0,052815206	724,8429565	0,063551426	724,8429565	0,053331435
724,8779297	0,043151222	724,8770752	0,081288926	724,8678589	0,032788701	724,8678589	0,031531934	724,8770752	0,079459339	724,8779297	0,041902527	724,8779297	0,038997367	724,8779297	0,051119898	724,8770752	0,079211742	724,8678589	0,033332147	724,8678589	0,03451502	724,8678589	0,02908176
724,902832	0,083430044	724,9019775	0,091194727	724,8927612	0,057517488	724,8927612	0,069014601	724,9019775	0,079547778	724,902832	0,055752493	724,902832	0,073565237	724,902832	0,072815068	724,9019775	0,091104716	724,8927612	0,052794233	724,8927612	0,062782653	724,8927612	0,055936843
724,9277344	0,069120146	724,9268799	0,056368448	724,9176636	0,053799897	724,9176636	0,076299317	724,9268799	0,050199073	724,9277344	0,034579232	724,9277344	0,057064489	724,9277344	0,050240356	724,9268799	0,061345655	724,9176636	0,056416824	724,9176636	0,085070968	724,9176636	0,062379662
724,9526367	0,088593423	724,9517822	0,095701307	724,9425659	0,041713387	724,9425659	0,072510585	724,9517822	0,075957909	724,9526367	0,040975433	724,9526367	0,055769324	724,9526367	0,053580504	724,9517822	0,133828953	724,9425659	0,036346909	724,9425659	0,0607673	724,9425659	0,037171513
724,9775391	0,248962149	724,9766846	0,148580104	724,9674683	0,081035234	724,9674683	0,197381869	724,9766846	0,09097746	724,9775391	0,074266709	724,9775391	0,114828087	724,9775391	0,087404788	724,9766846	0,249561414	724,9674683	0,061076161	724,9674683	0,140118301	724,9674683	0,077387996
725,0024414	0,415468514	725,0016479	0,165150121	724,9923706	0,134403661	724,9923706	0,410689712	725,0016479	0,074862391	725,0024414	0,078825757	725,0024414	0,159389019	725,0024414	0,09427949	725,0016479	0,356876314	724,9923706	0,084659874	724,9923706	0,285466552	724,9923706	0,134232312
725,0273438	0,662978768	725,0265503	0,295841873	725,0172729	0,225362435	725,0172729	0,673317969	725,0265503	0,144938901	725,0273438	0,081613779	725,0273438	0,211783901	725,0273438	0,100952685	725,0265503	0,567665517	725,0172729	0,10262914	725,0172729	0,429686427	725,0172729	0,187344909
725,0522461	1,118343115	725,0514526	0,409436435	725,0421753	0,443287462	725,0421753	0,965511739	725,0514526	0,225238264	725,0522461	0,207556084	725,0522461	0,488887191	725,0522461	0,23933278	725,0514526	0,705239654	725,0421753	0,228481829	725,0421753	0,619170547	725,0421753	0,374337673
725,0772095	1,434518218	725,076355	0,402395934	725,0670776	0,622542799	725,0670776	1,004291177	725,076355	0,233856484	725,0772095	0,400930822	725,0772095	0,824982584	725,0772095	0,41612494	725,076355	0,668716669	725,0670776	0,372639596	725,0670776	0,692618132	725,0670776	0,55128777
725,1021118	1,367512822	725,1012573	0,369770139	725,09198	0,652855158	725,09198	0,846035421	725,1012573	0,245081037	725,1021118	0,570958018	725,1021118	1,030044436	725,1021118	0,554292262	725,1012573	0,593153298	725,09198	0,437528491	725,09198	0,60258919	725,09198	0,579790592
725,1270142	1,168745518	725,1261597	0,379415363	725,1168823	0,614094853	725,1168823	0,674032509	725,1261597	0,295972049	725,1270142	0,757196128	725,1270142	1,132138252	725,1270142	0,686752796	725,1261597	0,546523631	725,1168823	0,466323078	725,1168823	0,494147599	725,1168823	0,550741374
725,1519165	0,929592073	725,151062	0,317657858	725,1417847	0,547774255	725,1417847	0,535962403	725,151062	0,27668047	725,1519165	0,810779274	725,1519165	1,075166225	725,1519165	0,71524775	725,151062	0,42960006	725,1417847	0,479593664	725,1417847	0,412589699	725,1417847	0,51920706
725,1768188	0,63961947	725,1759644	0,208503172	725,166687	0,413917035	725,166687	0,373487711	725,1759644	0,207387805	725,1768188	0,685985446	725,1768188	0,835545361	725,1768188	0,584879398	725,1759644	0,288577318	725,166687	0,405008852	725,166687	0,309615076	725,166687	0,408353776
725,2017212	0,469775856	725,2008667	0,207165256	725,1915894	0,286768615	725,1915894	0,227780938	725,2008667	0,210107714	725,2017212	0,585065007	725,2017212	0,651622772	725,2017212	0,48009643	725,2008667	0,267633408	725,1915894	0,29586041	725,1915894	0,180812523	725,1915894	0,270550072
725,2266235	0,399687022	725,225769	0,183286756	725,2164917	0,237096518	725,2164917	0,210482642	725,225769	0,17684108	725,2266235	0,490930527	725,2266235	0,528663635	725,2266235	0,408087403	725,225769	0,23027578	725,2164917	0,245631307	725,2164917	0,167421758	725,2164917	0,231850863
725,2515259	0,272478878	725,2506714	0,113031574	725,241394	0,178939879	725,241394	0,175961047	725,2506714	0,116309181	725,2515259	0,341779798	725,2515259	0,371109784	725,2515259	0,281479329	725,2506714	0,148529872	725,241394	0,187860623	725,241394	0,15779677	725,241394	0,183398843
725,2764282	0,209397078	725,2755737	0,134375885	725,2662964	0,118057825	725,2662964	0,11874336	725,2755737	0,130827025	725,2764282	0,260812879	725,2764282	0,272447914	725,2764282	0,220312327	725,2755737	0,180139005	725,2662964	0,119423486	725,2662964	0,100361496	725,2662964	0,108703077
725,3013306	0,245466292	725,3004761	0,16438359	725,2911987	0,135675415	725,2911987	0,161741272	725,3004761	0,129974604	725,3013306	0,23923704	725,3013306	0,268971443	725,3013306	0,2178258	725,3004761	0,220088825	725,2911987	0,12686491	725,2911987	0,132759571	725,2911987	0,129293948
725,3262329	0,215957776	725,3253784	0,147703409	725,3161011	0,140989378	725,3161011	0,199450195	725,3253784	0,094858542	725,3262329	0,168810904	725,3262329	0,212639764	725,3262329	0,162271991	725,3253784	0,241904691	725,3161011	0,127324253	725,3161011	0,178167447	725,3161011	0,143426284
725,3511353	0,220628977	725,3502808	0,27699101	725,3410645	0,134369537	725,3410645	0,232214913	725,3502808	0,150431037	725,3511353	0,13970089	725,3511353	0,169298068	725,3511353	0,137615681	725,3502808	0,453333944	725,3410645	0,103394985	725,3410645	0,196699992	725,3410645	0,12081822
725,3760376	0,338540584	725,3751831	0,502936184	725,3659668	0,234236285	725,3659668	0,410999447	725,3751831	0,247210696	725,3760376	0,168802336	725,3760376	0,226899177	725,3760376	0,175033852	725,3751831	0,761493564	725,3659668	0,165454522	725,3659668	0,340195179	725,3659668	0,204555213
725,4009399	0,500845134	725,4000854	0,706502438	725,3908691	0,362591207	725,3908691	0,595740676	725,4000854	0,339542001	725,4009399	0,195391238	725,4009399	0,328638464	725,4009399	0,243489861	725,4000854	0,981645942	725,3908691	0,254332483	725,3908691	0,518850327	725,3908691	0,33253637
725,4258423	0,56925118	725,4249878	0,918171167	725,4157715	0,485237718	725,4157715	0,657807887	725,4249878	0,50582099	725,4258423	0,216804489	725,4258423	0,418166846	725,4258423	0,323813885	725,4249878	1,161376476	725,4157715	0,344284296	725,4157715	0,580831945	725,4157715	0,418831915
725,4507446	0,642844975	725,4498901	1,119765759	725,4406738	0,60464108	725,4406738	0,70001626	725,4498901	0,695475698	725,4507446	0,341701746	725,4507446	0,587914884	725,4507446	0,522058368	725,4498901	1,31002903	725,4406738	0,465755701	725,4406738	0,612226546	725,4406738	0,52341938
725,475647	0,674006641	725,4747925	1,231555223	725,4655762	0,685153365	725,4655762	0,709906995	725,4747925	0,884661078	725,475647	0,477963954	725,475647	0,721585393	725,475647	0,713984787	725,4747925	1,328272939	725,4655762	0,580115736	725,4655762	0,628845632	725,4655762	0,614127517
725,5005493	0,570519209	725,4996948	1,161135912	725,4904785	0,68124795	725,4904785	0,62256062	725,4996948	0,965745151	725,5005493	0,519194722	725,5005493	0,694291234	725,5005493	0,777309954	725,4996948	1,185780764	725,4904785	0,646128833	725,4904785	0,575872362	725,4904785	0,623694479
725,5254517	0,490481973	725,5245972	1,092393517	725,5153809	0,59405005	725,5153809	0,461415261	725,5245972	1,025568724	725,5254517	0,566812813	725,5254517	0,658319056	725,5254517	0,81564033	725,5245972	1,054800272	725,5153809	0,615438104	725,5153809	0,419686615	725,5153809	0,538207769
725,550354	0,437797546	725,5494995	0,916073024	725,5402832	0,524770856	725,5402832	0,378735662	725,5494995	0,962122977	725,550354	0,571086347	725,550354	0,62716198	725,550354	0,79213351	725,5494995	0,810555041	725,5402832	0,584464252	725,5402832	0,342952788	725,5402832	0,484549284
725,5752563	0,295305192	725,5744019	0,635669827	725,5651855	0,390287697	725,5651855	0,267267942	725,5744019	0,794416964	725,5752563	0,468456119	725,5752563	0,480092585	725,5752563	0,640895069	725,5744019	0,518818021	725,5651855	0,486263871	725,5651855	0,26342997	725,5651855	0,381559968
725,6001587	0,210362926	725,5993042	0,485436857	725,5900879	0,254323453	725,5900879	0,149052083	725,5993042	0,660358071	725,6001587	0,38919881	725,6001587	0,353984177	725,6001587	0,507383585	725,5993042	0,38897267	725,5900879	0,338605225	725,5900879	0,147277191	725,5900879	0,238661334
725,625061	0,206710771	725,6242065	0,359589458	725,6149902	0,205781743	725,6149902	0,144086778	725,6242065	0,503710985	725,625061	0,339891344	725,625061	0,317378014	725,625061	0,418503106	725,6242065	0,288778454	725,6149902	0,264129519	725,6149902	0,129723519	725,6149902	0,198094413
725,6499634	0,13487193	725,6491089	0,199692011	725,6398926	0,150991783	725,6398926	0,128435567	725,6491089	0,330410123	725,6499634	0,219544694	725,6499634	0,219273522	725,6499634	0,289660007	725,6491089	0,156513631	725,6398926	0,195505083	725,6398926	0,126291543	725,6398926	0,158508763
725,6748657	0,089068174	725,6740112	0,165284649	725,6647949	0,086098716	725,6647949	0,072489932	725,6740112	0,258394212	725,6748657	0,157513872	725,6748657	0,137950331	725,6748657	0,194469303	725,6740112	0,144800946	725,6647949	0,116145559	725,6647949	0,068985462	725,6647949	0,084546164
725,6997681	0,123084642	725,6989746	0,155766487	725,6896973	0,098856285	725,6896973	0,095039837	725,6989746	0,205057099	725,6997681	0,150247261	725,6997681	0,146008343	725,6997681	0,174452424	725,6989746	0,144091278	725,6896973	0,109582543	725,6896973	0,077213906	725,6896973	0,093609139
725,7246704	0,124411806	725,723877	0,082334861	725,7145996	0,097345687	725,7145996	0,101822101	725,723877	0,115280218	725,7246704	0,119727656	725,7246704	0,135926634	725,7246704	0,138843685	725,723877	0,075170413	725,7145996	0,101973809	725,7145996	0,098773561	725,7145996	0,103752665
725,7495728	0,065930106	725,7487793	0,083331026	725,739502	0,056120902	725,739502	0,044836186	725,7487793	0,108636506	725,7495728	0,067781821	725,7495728	0,077075735	725,7495728	0,084573433	725,7487793	0,078961305	725,739502	0,058610264	725,739502	0,046213936	725,739502	0,051742498
725,7744751	0,073183224	725,7736816	0,10601674	725,7644043	0,063781455	725,7644043	0,056801248	725,7736816	0,117702	725,7744751	0,082600132	725,7744751	0,083963163	725,7744751	0,090162963	725,7736816	0,102601118	725,7644043	0,065046698	725,7644043	0,048128769	725,7644043	0,057593904
725,7993774	0,081979617	725,798584	0,085393906	725,7893066	0,069719523	725,7893066	0,077356309	725,798584	0,093919814	725,7993774	0,086917147	725,7993774	0,102459125	725,7993774	0,09601973	725,798584	0,077413186	725,7893066	0,075110257	725,7893066	0,074679144	725,7893066	0,078932665
725,8243408	0,044876304	725,8234863	0,045520913	725,814209	0,055839267	725,814209	0,053251337	725,8234863	0,055289883	725,8243408	0,044108938	725,8243408	0,057136536	725,8243408	0,054416344	725,8234863	0,03987091	725,814209	0,058018427	725,814209	0,064047843	725,814209	0,059866503
725,8492432	0,049511861	725,8483887	0,073993742	725,8391113	0,034244902	725,8391113	0,029603006	725,8483887	0,074763246	725,8492432	0,051891517	725,8492432	0,050512493	725,8492432	0,05660446	725,8483887	0,070215136	725,8391113	0,033816241	725,8391113	0,03144354	725,8391113	0,02847831
725,8741455	0,071639583	725,873291	0,080407724	725,8640137	0,053669397	725,8640137	0,059211571	725,873291	0,072011925	725,8741455	0,064173914	725,8741455	0,074713245	725,8741455	0,072263353	725,873291	0,078948535	725,8640137	0,051496617	725,8640137	0,056070674	725,8640137	0,054075912
725,8990479	0,049369287	725,8981934	0,043018021	725,888916	0,049477126	725,888916	0,064860336	725,8981934	0,041705292	725,8990479	0,03775968	725,8990479	0,050424736	725,8990479	0,044346765	725,8981934	0,046078481	725,888916	0,052869897	725,888916	0,073292665	725,888916	0,05966372
725,9239502	0,051871702	725,9230957	0,069386333	725,9138184	0,032776646	725,9138184	0,04393087	725,9230957	0,063152164	725,9239502	0,037790842	725,9239502	0,041339345	725,9239502	0,046314862	725,9230957	0,078325003	725,9138184	0,033672146	725,9138184	0,040811293	725,9138184	0,032485407
725,9488525	0,114297278	725,947998	0,094468988	725,9387817	0,06424623	725,9387817	0,102476254	725,947998	0,070972428	725,9488525	0,06755653	725,9488525	0,081586033	725,9488525	0,073206298	725,947998	0,124726959	725,9387817	0,054418411	725,9387817	0,079349734	725,9387817	0,059494864
725,9737549	0,175549611	725,9729004	0,070372678	725,9636841	0,076684125	725,9636841	0,182042569	725,9729004	0,045651004	725,9737549	0,047251273	725,9737549	0,078477293	725,9737549	0,060012106	725,9729004	0,144272	725,9636841	0,063698664	725,9636841	0,143435359	725,9636841	0,086247303
725,9986572	0,39049691	725,9978027	0,148998305	725,9885864	0,090499736	725,9885864	0,280419469	725,9978027	0,080586053	725,9986572	0,056050152	725,9986572	0,103264749	725,9986572	0,066366106	725,9978027	0,33085525	725,9885864	0,053156827	725,9885864	0,184334069	725,9885864	0,082450591
726,0235596	0,888566196	726,0227051	0,27326411	726,0134888	0,204450935	726,0134888	0,572740674	726,0227051	0,127455294	726,0235596	0,132160217	726,0235596	0,28798306	726,0235596	0,146950334	726,0227051	0,592355251	726,0134888	0,111533865	726,0134888	0,37138024	726,0134888	0,178171769
726,0484619	1,41849196	726,0476074	0,333337814	726,0383911	0,354788482	726,0383911	0,872867346	726,0476074	0,141175658	726,0484619	0,228229538	726,0484619	0,560198843	726,0484619	0,250835985	726,0476074	0,741775334	726,0383911	0,19217281	726,0383911	0,594800234	726,0383911	0,321987122
726,0733643	1,698117733	726,0725098	0,440565914	726,0632935	0,492093384	726,0632935	0,926395953	726,0725098	0,233753905	726,0733643	0,345629722	726,0733643	0,80372256	726,0733643	0,352514297	726,0725098	0,841785848	726,0632935	0,26660803	726,0632935	0,646242142	726,0632935	0,430771947
726,0982666	1,815279365	726,0974121	0,493454129	726,0881958	0,616823196	726,0881958	0,836887121	726,0974121	0,318258047	726,0982666	0,581573486	726,0982666	1,126986384	726,0982666	0,559761584	726,0974121	0,796703696	726,0881958	0,410706669	726,0881958	0,620425284	726,0881958	0,555312872
726,1231689	1,603096008	726,1223145	0,385858953	726,1130981	0,609785199	726,1130981	0,687089562	726,1223145	0,287547439	726,1231689	0,84969455	726,1231689	1,407216311	726,1231689	0,797664881	726,1223145	0,584716201	726,1130981	0,486419648	726,1130981	0,54139775	726,1130981	0,577767253
726,1480713	1,161635399	726,1472168	0,320283979	726,1380005	0,502747059	726,1380005	0,512586892	726,1472168	0,279728651	726,1480713	0,948961735	726,1480713	1,323277712	726,1480713	0,836749732	726,1472168	0,467086434	726,1380005	0,448107183	726,1380005	0,415469974	726,1380005	0,487191826
726,1729736	0,836155593	726,1721191	0,302769601	726,1629028	0,413104713	726,1629028	0,383035183	726,1721191	0,28029412	726,1729736	0,90855968	726,1729736	1,101285338	726,1729736	0,771868825	726,1721191	0,424068749	726,1629028	0,385210812	726,1629028	0,300836027	726,1629028	0,394951165
726,197876	0,639645934	726,1970215	0,250881493	726,1878052	0,346386403	726,1878052	0,310863644	726,1970215	0,240644395	726,197876	0,781646132	726,197876	0,8846488	726,197876	0,65712738	726,1970215	0,327944547	726,1878052	0,337529063	726,1878052	0,250341564	726,1878052	0,337147057
726,2227783	0,427146107	726,2219238	0,148940906	726,2127075	0,251976967	726,2127075	0,234094843	726,2219238	0,159239903	726,2227783	0,560543299	726,2227783	0,61983496	726,2227783	0,465740561	726,2219238	0,201659441	726,2127075	0,265784979	726,2127075	0,205207556	726,2127075	0,262955517
726,2476807	0,315867782	726,2468262	0,151819825	726,2376099	0,16172561	726,2376099	0,148361817	726,2468262	0,155625388	726,2476807	0,427048147	726,2476807	0,432394862	726,2476807	0,347606093	726,2468262	0,209327817	726,2376099	0,171100527	726,2376099	0,12511611	726,2376099	0,158453837
726,272583	0,315641552	726,2717285	0,157890663	726,2625122	0,159086481	726,2625122	0,171609208	726,2717285	0,142815396	726,272583	0,350828201	726,272583	0,372290701	726,272583	0,299786329	726,2717285	0,215360194	726,2625122	0,154755384	726,2625122	0,138375118	726,2625122	0,15409039
726,2974854	0,27656728	726,2966309	0,110547975	726,2874146	0,144318387	726,2874146	0,188036934	726,2966309	0,092006966	726,2974854	0,245296672	726,2974854	0,279635936	726,2974854	0,21601449	726,2966309	0,18018578	726,2874146	0,13702628	726,2874146	0,169208542	726,2874146	0,152138412
726,3223877	0,259708256	726,3215332	0,174215019	726,3123169	0,115415767	726,3123169	0,164080188	726,3215332	0,121549718	726,3223877	0,194928154	726,3223877	0,224567428	726,3223877	0,170931682	726,3215332	0,290311068	726,3123169	0,097218037	726,3123169	0,13815397	726,3123169	0,107625887
726,34729	0,334317744	726,3464355	0,302997708	726,3372192	0,16725181	726,3372192	0,26009503	726,3464355	0,166170374	726,34729	0,2115428	726,34729	0,264799356	726,34729	0,206454396	726,3464355	0,477759242	726,3372192	0,132781357	726,3372192	0,215972513	726,3372192	0,15400666
726,3721924	0,379992932	726,3713379	0,443128318	726,3621216	0,232423216	726,3621216	0,394193381	726,3713379	0,19514817	726,3721924	0,188442126	726,3721924	0,269914389	726,3721924	0,208818361	726,3713379	0,684036493	726,3621216	0,172668159	726,3621216	0,354483008	726,3621216	0,223761335
726,3970947	0,479175717	726,3963013	0,812258601	726,3870239	0,295911998	726,3870239	0,503620088	726,3963013	0,383291125	726,3970947	0,191862479	726,3970947	0,296201557	726,3970947	0,244803086	726,3963013	1,182327271	726,3870239	0,202420622	726,3870239	0,444639534	726,3870239	0,264737636
726,4219971	0,728401244	726,4212036	1,438101053	726,4119263	0,483352989	726,4119263	0,775678992	726,4212036	0,69504571	726,4219971	0,26564616	726,4219971	0,416494042	726,4219971	0,355862707	726,4212036	2,008665323	726,4119263	0,336259276	726,4119263	0,660014033	726,4119263	0,422728688
726,4468994	1,140212774	726,446106	2,22009325	726,4368286	0,735072494	726,4368286	1,173894048	726,446106	1,118721962	726,4468994	0,360851526	726,4468994	0,602203548	726,4468994	0,509217501	726,446106	2,917743444	726,4368286	0,537680745	726,4368286	0,991259575	726,4368286	0,650547922
726,4718018	1,829849839	726,4710083	3,110251188	726,461731	1,016205788	726,461731	1,399885058	726,4710083	1,832633734	726,4718018	0,513634741	726,4718018	0,924464166	726,4718018	0,793783367	726,4710083	3,537861109	726,461731	0,771294594	726,461731	1,163221836	726,461731	0,862173319
726,4967041	2,314207077	726,4959106	3,565727472	726,4866333	1,264568686	726,4866333	1,381942153	726,4959106	2,456717014	726,4967041	0,907629371	726,4967041	1,530253172	726,4967041	1,372467875	726,4959106	3,550390482	726,4866333	1,041793346	726,4866333	1,152747989	726,4866333	1,053899765
726,5216064	2,161711454	726,520813	3,492759466	726,5115356	1,382943153	726,5115356	1,185770035	726,520813	2,886567116	726,5216064	1,500448704	726,5216064	2,145805597	726,5216064	2,100537777	726,520813	3,054819107	726,5115356	1,318521023	726,5115356	1,021074533	726,5115356	1,186346531
726,5465698	1,506995201	726,5457153	2,861608744	726,536499	1,213014007	726,536499	0,806140661	726,5457153	3,018909931	726,5465698	1,931211472	726,5465698	2,231370449	726,5465698	2,51143837	726,5457153	2,165233612	726,536499	1,452942491	726,536499	0,728968978	726,536499	1,098893523
726,5714722	0,956981778	726,5706177	2,129087687	726,5614014	0,850402713	726,5614014	0,460471183	726,5706177	2,73985815	726,5714722	1,985151291	726,5714722	1,851150513	726,5714722	2,404239655	726,5706177	1,48978436	726,5614014	1,217838764	726,5614014	0,422972143	726,5614014	0,78692323
726,5963745	0,645838201	726,59552	1,48971653	726,5863037	0,580507874	726,5863037	0,314500481	726,59552	2,1767869	726,5963745	1,676097035	726,5963745	1,40038991	726,5963745	1,946833372	726,59552	0,989002228	726,5863037	0,904031456	726,5863037	0,289290696	726,5863037	0,559459746
726,6212769	0,391312718	726,6204224	0,948219001	726,6112061	0,365601838	726,6112061	0,215837643	726,6204224	1,573969722	726,6212769	1,181231737	726,6212769	0,936154127	726,6212769	1,371769309	726,6204224	0,587293506	726,6112061	0,609780073	726,6112061	0,212594271	726,6112061	0,380455583
726,6461792	0,235586196	726,6453247	0,645935833	726,6361084	0,204764023	726,6361084	0,114353225	726,6453247	1,147845268	726,6461792	0,797246873	726,6461792	0,596052349	726,6461792	0,922943294	726,6453247	0,417712837	726,6361084	0,364524275	726,6361084	0,110618167	726,6361084	0,206519619
726,6710815	0,22068055	726,6702271	0,466544092	726,6610107	0,169769511	726,6610107	0,122543201	726,6702271	0,814900041	726,6710815	0,569790244	726,6710815	0,44622618	726,6710815	0,654446721	726,6702271	0,326663166	726,6610107	0,257269472	726,6610107	0,104854643	726,6610107	0,162558034
726,6959839	0,154705405	726,6951294	0,276724726	726,6859131	0,13477467	726,6859131	0,122832328	726,6951294	0,520505607	726,6959839	0,369354576	726,6959839	0,29607147	726,6959839	0,428051442	726,6951294	0,188231543	726,6859131	0,188711658	726,6859131	0,116515972	726,6859131	0,140100643
726,7208862	0,101395391	726,7200317	0,215202406	726,7108154	0,078461297	726,7108154	0,061655544	726,7200317	0,386132002	726,7208862	0,236443758	726,7208862	0,183836088	726,7208862	0,268423617	726,7200317	0,158721372	726,7108154	0,106790259	726,7108154	0,060180347	726,7108154	0,07336545
726,7457886	0,120456755	726,7449341	0,205695391	726,7357178	0,083662666	726,7357178	0,072021529	726,7449341	0,30963251	726,7457886	0,204139516	726,7457886	0,179959461	726,7457886	0,226164132	726,7449341	0,166346163	726,7357178	0,101785257	726,7357178	0,057957493	726,7357178	0,076857366
726,7706909	0,125749901	726,7698364	0,118338466	726,7606201	0,085508831	726,7606201	0,085100934	726,7698364	0,191221684	726,7706909	0,163398325	726,7706909	0,170929432	726,7706909	0,196187571	726,7698364	0,088006184	726,7606201	0,101200372	726,7606201	0,082924813	726,7606201	0,091685057
726,7955933	0,063696831	726,7947388	0,098745376	726,7855225	0,042606939	726,7855225	0,036677897	726,7947388	0,155713364	726,7955933	0,0995441	726,7955933	0,10039074	726,7955933	0,121981896	726,7947388	0,079358377	726,7855225	0,052788965	726,7855225	0,041545857	726,7855225	0,042653479
726,8204956	0,062491659	726,8196411	0,127382115	726,8104248	0,045883	726,8104248	0,04202031	726,8196411	0,157214731	726,8204956	0,091751732	726,8204956	0,07850194	726,8204956	0,102237739	726,8196411	0,11386317	726,8104248	0,05143052	726,8104248	0,038763359	726,8104248	0,041917726
726,8453979	0,091747299	726,8445435	0,093949273	726,8353271	0,069567323	726,8353271	0,080047421	726,8445435	0,111829251	726,8453979	0,094384506	726,8453979	0,108600006	726,8453979	0,111315854	726,8445435	0,086160503	726,8353271	0,073516913	726,8353271	0,076311111	726,8353271	0,073803067
726,8703003	0,060457002	726,8694458	0,058706306	726,8602295	0,052046843	726,8602295	0,062699161	726,8694458	0,074500546	726,8703003	0,050881702	726,8703003	0,061834984	726,8703003	0,063693747	726,8694458	0,052534711	726,8602295	0,056615733	726,8602295	0,071084738	726,8602295	0,059620999
726,8952026	0,061218906	726,8943481	0,081153281	726,8851318	0,033704109	726,8851318	0,038949452	726,8943481	0,092673421	726,8952026	0,050501406	726,8952026	0,053000629	726,8952026	0,058729216	726,8943481	0,083836615	726,8851318	0,033242051	726,8851318	0,041711021	726,8851318	0,032840267
726,920105	0,117227755	726,9192505	0,100609824	726,9100342	0,057958208	726,9100342	0,079441026	726,9192505	0,09471833	726,920105	0,07677383	726,920105	0,095891006	726,920105	0,086934	726,9192505	0,111232728	726,9100342	0,054471284	726,9100342	0,071080513	726,9100342	0,057712078
726,9450073	0,120861933	726,9441528	0,067424729	726,9349365	0,065087296	726,9349365	0,113536268	726,9441528	0,059220456	726,9450073	0,050095692	726,9450073	0,080340311	726,9450073	0,065188043	726,9441528	0,095967531	726,9349365	0,061810121	726,9349365	0,107405216	726,9349365	0,076349162
726,9699097	0,201786891	726,9690552	0,114933506	726,9598389	0,053348452	726,9598389	0,149581611	726,9690552	0,083516985	726,9699097	0,048070323	726,9699097	0,072586268	726,9699097	0,060199481	726,9690552	0,214789972	726,9598389	0,041704878	726,9598389	0,104588345	726,9598389	0,051875632
726,994812	0,555501401	726,9939575	0,206825092	726,9847412	0,122934923	726,9847412	0,372851372	726,9939575	0,111789525	726,994812	0,096307337	726,994812	0,175250798	726,994812	0,111435033	726,9939575	0,461883456	726,9847412	0,075630106	726,9847412	0,238311261	726,9847412	0,108013503
727,0197144	1,147423625	727,0188599	0,282704949	727,0096436	0,237663671	727,0096436	0,720737457	727,0188599	0,109760441	727,0197144	0,133686021	727,0197144	0,342187345	727,0197144	0,1549723	727,0188599	0,759453177	727,0096436	0,127437606	727,0096436	0,486314356	727,0096436	0,217064425
727,0446167	2,093667746	727,0437622	0,506752014	727,0345459	0,388319314	727,0345459	1,135533452	727,0437622	0,210657477	727,0446167	0,261182994	727,0446167	0,68441838	727,0446167	0,283423692	727,0437622	1,258378267	727,0345459	0,18360579	727,0345459	0,760100961	727,0345459	0,331310689
727,069519	3,352088213	727,0687256	0,78535229	727,0594482	0,686352789	727,0594482	1,663411736	727,0687256	0,359357506	727,069519	0,601931453	727,069519	1,36079669	727,069519	0,60224092	727,0687256	1,737901688	727,0594482	0,354604036	727,0594482	1,164836407	727,0594482	0,59322542
727,0944214	4,197547913	727,0936279	0,923576951	727,0843506	0,987303317	727,0843506	2,022946119	727,0936279	0,450964659	727,0944214	1,045351148	727,0944214	2,19969511	727,0944214	1,021476388	727,0936279	1,850919247	727,0843506	0,575716019	727,0843506	1,524201035	727,0843506	0,910565972
727,1193237	4,18646431	727,1185303	1,004515648	727,1092529	1,163535357	727,1092529	1,838213563	727,1185303	0,592451096	727,1193237	1,426147342	727,1193237	2,761375189	727,1193237	1,347414136	727,1185303	1,707932711	727,1092529	0,751657128	727,1092529	1,456112385	727,1092529	1,108380318
727,1442261	3,693049192	727,1434326	0,98121202	727,1342163	1,212972999	727,1342163	1,382496834	727,1434326	0,704416215	727,1442261	1,860999584	727,1442261	3,146468878	727,1442261	1,700495124	727,1434326	1,410233021	727,1342163	0,924149811	727,1342163	1,140558243	727,1342163	1,187020063
727,1691284	2,789769411	727,168335	0,815417707	727,1591187	1,045375705	727,1591187	0,96501261	727,168335	0,667061627	727,1691284	2,208395958	727,1691284	3,189923763	727,1691284	1,971333981	727,168335	1,080962777	727,1591187	0,956151068	727,1591187	0,83047837	727,1591187	1,065200925
727,1940308	1,878965139	727,1932373	0,6326738	727,184021	0,79838866	727,184021	0,665542126	727,1932373	0,592346013	727,1940308	2,100928068	727,1940308	2,62199378	727,1940308	1,82374227	727,1932373	0,802903652	727,184021	0,82317102	727,184021	0,584497333	727,184021	0,837471783
727,2189331	1,234377146	727,2181396	0,496414661	727,2089233	0,592613637	727,2089233	0,463547081	727,2181396	0,524194539	727,2189331	1,752445221	727,2189331	1,943195105	727,2189331	1,489382267	727,2181396	0,612025142	727,2089233	0,649922967	727,2089233	0,405410111	727,2089233	0,614571273
727,2438354	0,919561148	727,243042	0,387902319	727,2338257	0,42634213	727,2338257	0,369298577	727,243042	0,418419927	727,2438354	1,344443917	727,2438354	1,421236873	727,2438354	1,144430399	727,243042	0,481622994	727,2338257	0,480484784	727,2338257	0,309645981	727,2338257	0,444834471
727,2687378	0,657370627	727,2679443	0,255317897	727,258728	0,306273282	727,258728	0,306660175	727,2679443	0,28348577	727,2687378	0,932903171	727,2687378	0,979912281	727,2687378	0,796372473	727,2679443	0,34331888	727,258728	0,34381336	727,258728	0,276270539	727,258728	0,3275626
727,2937012	0,512627363	727,2928467	0,254794002	727,2836304	0,21315366	727,2836304	0,232403189	727,2928467	0,25524056	727,2937012	0,65784055	727,2937012	0,680971146	727,2937012	0,559749842	727,2928467	0,365627021	727,2836304	0,222478434	727,2836304	0,201444596	727,2836304	0,213603601
727,3186035	0,519032598	727,317749	0,301840365	727,3085327	0,216840133	727,3085327	0,289540827	727,317749	0,240059793	727,3186035	0,52560991	727,3186035	0,572691202	727,3186035	0,457077354	727,317749	0,464320123	727,3085327	0,202369809	727,3085327	0,234298214	727,3085327	0,21221751
727,3435059	0,515656233	727,3426514	0,33883521	727,3334351	0,24044314	727,3334351	0,411715776	727,3426514	0,19971405	727,3435059	0,395225406	727,3435059	0,476716876	727,3435059	0,368109375	727,3426514	0,602708519	727,3334351	0,202214241	727,3334351	0,341549695	727,3334351	0,242639169
727,3684082	0,588044941	727,3675537	0,562545419	727,3583374	0,283410966	727,3583374	0,565961599	727,3675537	0,292970687	727,3684082	0,331077546	727,3684082	0,419472963	727,3684082	0,323996335	727,3675537	0,963619173	727,3583374	0,192843735	727,3583374	0,43681699	727,3583374	0,251694202
727,3933105	0,79644382	727,3924561	0,902327895	727,3832397	0,471936345	727,3832397	0,808433235	727,3924561	0,474645525	727,3933105	0,384816825	727,3933105	0,52157259	727,3933105	0,412642479	727,3924561	1,361189842	727,3832397	0,308749169	727,3832397	0,612104714	727,3832397	0,411631614
727,4182129	0,94323343	727,4173584	1,172785282	727,4081421	0,678855717	727,4081421	0,94839412	727,4173584	0,658017278	727,4182129	0,44859457	727,4182129	0,645958841	727,4182129	0,523450494	727,4173584	1,644315839	727,4081421	0,501759529	727,4081421	0,757813394	727,4081421	0,620216489
727,4431152	1,043257356	727,4422607	1,572881341	727,4330444	0,77957207	727,4330444	0,977504969	727,4422607	0,952767968	727,4431152	0,511408269	727,4431152	0,699730575	727,4431152	0,614065528	727,4422607	2,054191113	727,4330444	0,637849212	727,4330444	0,796404243	727,4330444	0,703563154
727,4680176	1,281226635	727,4671631	2,062658787	727,4579468	0,903324127	727,4579468	1,084686875	727,4671631	1,329736948	727,4680176	0,663103104	727,4680176	0,863491833	727,4680176	0,796291471	727,4671631	2,456983089	727,4579468	0,781806111	727,4579468	0,885775387	727,4579468	0,797824502
727,4929199	1,571179628	727,4920654	2,304803371	727,4828491	1,047113657	727,4828491	1,134580135	727,4920654	1,66129756	727,4929199	0,869832635	727,4929199	1,155950189	727,4929199	1,081165433	727,4920654	2,414390087	727,4828491	0,929495752	727,4828491	0,947703481	727,4828491	0,925297499
727,5178223	1,4996382	727,5169678	2,270692587	727,5077515	1,028045177	727,5077515	0,915846705	727,5169678	1,883143783	727,5178223	1,032543778	727,5178223	1,389947772	727,5178223	1,339353323	727,5169678	2,152106762	727,5077515	1,002792716	727,5077515	0,775860608	727,5077515	0,91372329
727,5427246	1,200188756	727,5418701	2,101509333	727,5326538	0,954534352	727,5326538	0,724527895	727,5418701	2,016869545	727,5427246	1,248122811	727,5427246	1,486033916	727,5427246	1,596322656	727,5418701	1,843184352	727,5326538	1,018051744	727,5326538	0,614920497	727,5326538	0,850950539
727,567627	0,903450489	727,5667725	1,692674518	727,5575562	0,842209101	727,5575562	0,5967803	727,5667725	1,910958886	727,567627	1,361492276	727,567627	1,41706419	727,567627	1,662236333	727,5667725	1,362543821	727,5575562	0,977718234	727,5575562	0,504040003	727,5575562	0,778339326
727,5925293	0,598559916	727,5916748	1,187820196	727,5824585	0,629043698	727,5824585	0,417061418	727,5916748	1,56798768	727,5925293	1,198971868	727,5925293	1,103980541	727,5925293	1,426469803	727,5916748	0,870113432	727,5824585	0,79755193	727,5824585	0,372212321	727,5824585	0,609579265
727,6174316	0,386578768	727,6165771	0,846072853	727,6073608	0,406830132	727,6073608	0,238382533	727,6165771	1,249385595	727,6174316	0,940068066	727,6174316	0,780179322	727,6174316	1,092169881	727,6165771	0,607275009	727,6073608	0,558378935	727,6073608	0,211046547	727,6073608	0,394125104
727,642334	0,318759948	727,6414795	0,60344702	727,6322632	0,299136132	727,6322632	0,197679505	727,6414795	0,936363876	727,642334	0,725685298	727,642334	0,597263336	727,642334	0,825466275	727,6414795	0,442343652	727,6322632	0,40731588	727,6322632	0,16594924	727,6322632	0,289527714
727,6672363	0,23517482	727,6663818	0,361282766	727,6571655	0,2147526	727,6571655	0,177915201	727,6663818	0,623034596	727,6672363	0,497036576	727,6672363	0,414810628	727,6672363	0,564684629	727,6663818	0,251781702	727,6571655	0,292858303	727,6571655	0,161003217	727,6571655	0,221318215
727,6921387	0,163066044	727,6912842	0,265027136	727,6820679	0,127033427	727,6820679	0,105920702	727,6912842	0,454474866	727,6921387	0,325381726	727,6921387	0,263316602	727,6921387	0,362357646	727,6912842	0,207634747	727,6820679	0,169863805	727,6820679	0,0921361	727,6820679	0,121557601
727,717041	0,193588614	727,7161865	0,24106358	727,7069702	0,1308745	727,7069702	0,116937779	727,7161865	0,351367474	727,717041	0,265996963	727,717041	0,238534719	727,717041	0,290472597	727,7161865	0,210713923	727,7069702	0,14277254	727,7069702	0,093536615	727,7069702	0,118210629
727,7419434	0,177372977	727,7410889	0,140582547	727,7319336	0,126293227	727,7319336	0,13237749	727,7410889	0,217058346	727,7419434	0,189731821	727,7419434	0,204672426	727,7419434	0,216599151	727,7410889	0,122107409	727,7319336	0,136138216	727,7319336	0,118347734	727,7319336	0,129390076
727,7668457	0,119698569	727,7660522	0,116462708	727,7568359	0,071628585	727,7568359	0,068105526	727,7660522	0,169160992	727,7668457	0,129094303	727,7668457	0,138405353	727,7668457	0,142638326	727,7660522	0,109531231	727,7568359	0,082039282	727,7568359	0,067466184	727,7568359	0,074081622
727,791748	0,133966148	727,7909546	0,14181444	727,7817383	0,074432075	727,7817383	0,068696938	727,7909546	0,166590437	727,791748	0,141416222	727,791748	0,148405358	727,791748	0,147388771	727,7909546	0,137137204	727,7817383	0,077154823	727,7817383	0,063203014	727,7817383	0,067914024
727,8166504	0,150513262	727,8158569	0,087117195	727,8066406	0,085989535	727,8066406	0,093961276	727,8158569	0,104409032	727,8166504	0,1435128	727,8166504	0,166974574	727,8166504	0,151941717	727,8158569	0,07999038	727,8066406	0,091038473	727,8066406	0,093009643	727,8066406	0,094630301
727,8415527	0,097607024	727,8407593	0,065958701	727,831543	0,051318083	727,831543	0,053337745	727,8407593	0,083131567	727,8415527	0,089245841	727,8415527	0,110587887	727,8415527	0,099114932	727,8407593	0,065980725	727,831543	0,055123538	727,831543	0,055631496	727,831543	0,053606771
727,8664551	0,08215785	727,8656616	0,108490653	727,8564453	0,048481215	727,8564453	0,050561503	727,8656616	0,116796389	727,8664551	0,081932224	727,8664551	0,08399979	727,8664551	0,082278855	727,8656616	0,116214842	727,8564453	0,048971057	727,8564453	0,046176661	727,8564453	0,043845065
727,8913574	0,125436395	727,890564	0,101373047	727,8813477	0,064337999	727,8813477	0,076126717	727,890564	0,096165657	727,8913574	0,102399029	727,8913574	0,116874315	727,8913574	0,102777623	727,890564	0,106300481	727,8813477	0,059768651	727,8813477	0,068024054	727,8813477	0,065011248
727,9162598	0,106722064	727,9154663	0,059499178	727,90625	0,066354856	727,90625	0,093711622	727,9154663	0,058462955	727,9162598	0,067414656	727,9162598	0,087812357	727,9162598	0,076750576	727,9154663	0,065699004	727,90625	0,065628387	727,90625	0,093540229	727,90625	0,075411089
727,9411621	0,105615355	727,9403687	0,088341899	727,9311523	0,045447551	727,9311523	0,075799607	727,9403687	0,080097839	727,9411621	0,060567573	727,9411621	0,074680611	727,9411621	0,063179523	727,9403687	0,118860528	727,9311523	0,042998996	727,9311523	0,0628151	727,9311523	0,045289468
727,9660645	0,253762394	727,965271	0,138382301	727,9560547	0,078936189	727,9560547	0,169337004	727,965271	0,095331945	727,9660645	0,095046118	727,9660645	0,123712078	727,9660645	0,096193574	727,965271	0,230932906	727,9560547	0,066950612	727,9560547	0,118917055	727,9560547	0,076149479
727,9909668	0,530058742	727,9901733	0,147178203	727,980957	0,120310441	727,980957	0,339357167	727,9901733	0,074035868	727,9909668	0,081695631	727,9909668	0,159988582	727,9909668	0,099411659	727,9901733	0,362752616	727,980957	0,088537455	727,980957	0,237444118	727,980957	0,125231147
728,0159302	1,043618321	728,0150757	0,291860789	728,0058594	0,162202016	728,0058594	0,519975126	728,0150757	0,129655764	728,0159302	0,117475212	728,0159302	0,268824726	728,0159302	0,133459181	728,0150757	0,684004009	728,0058594	0,08651188	728,0058594	0,340582639	728,0058594	0,143180609
728,0408325	1,805192471	728,039978	0,497062832	728,0307617	0,318668395	728,0307617	0,829390168	728,039978	0,234592021	728,0408325	0,287189424	728,0408325	0,642008662	728,0408325	0,310136497	728,039978	1,051721215	728,0307617	0,172110483	728,0307617	0,551846921	728,0307617	0,279072911
728,0657349	2,440449476	728,0648804	0,585314512	728,0556641	0,503091097	728,0556641	1,091751933	728,0648804	0,287868112	728,0657349	0,530015945	728,0657349	1,118565321	728,0657349	0,54417038	728,0648804	1,196272731	728,0556641	0,302220881	728,0556641	0,788898289	728,0556641	0,467746198
728,0906372	2,681787252	728,0897827	0,662094235	728,0805664	0,612267077	728,0805664	1,127236962	728,0897827	0,394208282	728,0906372	0,844552696	728,0906372	1,591444492	728,0906372	0,809630215	728,0897827	1,215137005	728,0805664	0,393053561	728,0805664	0,842307091	728,0805664	0,570627928
728,1155396	2,509639025	728,1146851	0,703463376	728,1054688	0,709677279	728,1054688	1,033450246	728,1146851	0,4839724	728,1155396	1,221544862	728,1155396	1,978423834	728,1155396	1,107706189	728,1146851	1,126674175	728,1054688	0,503278732	728,1054688	0,791119337	728,1054688	0,664961219
728,1404419	2,176494122	728,1395874	0,575462341	728,1303711	0,715822041	728,1303711	0,849028587	728,1395874	0,441069603	728,1404419	1,409752131	728,1404419	2,081836462	728,1404419	1,231911778	728,1395874	0,851608098	728,1303711	0,576633692	728,1303711	0,693519592	728,1303711	0,709740996
728,1653442	1,681627154	728,1644897	0,456198931	728,1552734	0,568462372	728,1552734	0,563786864	728,1644897	0,404136896	728,1653442	1,409640789	728,1653442	1,908120155	728,1653442	1,208412766	728,1644897	0,641931951	728,1552734	0,517783523	728,1552734	0,481577635	728,1552734	0,577264249
728,1902466	1,202341676	728,1893921	0,434656501	728,1801758	0,436968535	728,1801758	0,393485218	728,1893921	0,410399139	728,1902466	1,307300925	728,1902466	1,573037267	728,1902466	1,098543882	728,1893921	0,57877326	728,1801758	0,4357346	728,1801758	0,323470682	728,1801758	0,434528887
728,2151489	0,913945615	728,2142944	0,370387107	728,2050781	0,380271524	728,2050781	0,355427891	728,2142944	0,353695422	728,2151489	1,115545869	728,2151489	1,255775452	728,2151489	0,94091171	728,2142944	0,473846585	728,2050781	0,395835876	728,2050781	0,30194822	728,2050781	0,394833893
728,2400513	0,65835923	728,2391968	0,247316465	728,2299805	0,294442058	728,2299805	0,289812207	728,2391968	0,253499955	728,2400513	0,826068282	728,2400513	0,923600674	728,2400513	0,705105901	728,2391968	0,326926351	728,2299805	0,316299409	728,2299805	0,257785112	728,2299805	0,312522799
728,2649536	0,490841895	728,2640991	0,23081471	728,2548828	0,198353618	728,2548828	0,204174444	728,2640991	0,230671346	728,2649536	0,612951934	728,2649536	0,660433829	728,2649536	0,526721954	728,2640991	0,314736187	728,2548828	0,21185118	728,2548828	0,172146469	728,2548828	0,200512886
728,289856	0,472539842	728,2890015	0,242113262	728,2797852	0,194745094	728,2797852	0,225787595	728,2890015	0,217508614	728,289856	0,503884137	728,289856	0,555972219	728,289856	0,443108708	728,2890015	0,335759103	728,2797852	0,190068945	728,2797852	0,183870345	728,2797852	0,190463811
728,3147583	0,416442424	728,3139038	0,191616431	728,3046875	0,186855435	728,3046875	0,248120531	728,3139038	0,151279867	728,3147583	0,376533866	728,3147583	0,442097932	728,3147583	0,338991344	728,3139038	0,297605962	728,3046875	0,179000542	728,3046875	0,21967575	728,3046875	0,198698103
728,3396606	0,38066408	728,3388062	0,260580301	728,3296509	0,160316229	728,3296509	0,243681222	728,3388062	0,178309426	728,3396606	0,295202315	728,3396606	0,348353207	728,3396606	0,26968956	728,3388062	0,425964236	728,3296509	0,135506719	728,3296509	0,20414798	728,3296509	0,153334379
728,364563	0,489611387	728,3637085	0,418810695	728,3545532	0,220553204	728,3545532	0,36716485	728,3637085	0,24429372	728,364563	0,297140241	728,364563	0,381215811	728,364563	0,291523308	728,3637085	0,656539142	728,3545532	0,166131079	728,3545532	0,291581601	728,3545532	0,19989568
728,3894653	0,614948392	728,3886108	0,54274261	728,3794556	0,32153219	728,3794556	0,526746869	728,3886108	0,283055812	728,3894653	0,285136163	728,3894653	0,421832681	728,3894653	0,312747747	728,3886108	0,82096839	728,3794556	0,23437342	728,3794556	0,43459332	728,3794556	0,299307764
728,4143677	0,695765913	728,4135132	0,759620547	728,4043579	0,3931759	728,4043579	0,569766045	728,4135132	0,436085016	728,4143677	0,307962596	728,4143677	0,458495349	728,4143677	0,354833215	728,4135132	1,044208646	728,4043579	0,284956336	728,4043579	0,468017489	728,4043579	0,349895746
728,43927	0,8036924	728,4384155	1,042285919	728,4292603	0,515788674	728,4292603	0,633924007	728,4384155	0,658607483	728,43927	0,440427095	728,43927	0,625314057	728,43927	0,511476994	728,4384155	1,302872419	728,4292603	0,401018769	728,4292603	0,524406075	728,4292603	0,453959078
728,4641724	0,866716087	728,4633789	1,202615619	728,4541626	0,61969012	728,4541626	0,710490882	728,4633789	0,800792456	728,4641724	0,526019156	728,4641724	0,73219955	728,4641724	0,625417531	728,4633789	1,390600801	728,4541626	0,525991619	728,4541626	0,611342192	728,4541626	0,564736009
728,4890747	0,844306171	728,4882813	1,326524973	728,4790649	0,62454021	728,4790649	0,660365701	728,4882813	0,977762341	728,4890747	0,553759754	728,4890747	0,746809602	728,4890747	0,685648859	728,4882813	1,411426306	728,4790649	0,556743443	728,4790649	0,579260707	728,4790649	0,562459707
728,5139771	0,81298846	728,5131836	1,406230092	728,5039673	0,64553529	728,5039673	0,604807734	728,5131836	1,171047091	728,5139771	0,633661032	728,5139771	0,810432434	728,5139771	0,80095464	728,5131836	1,380623698	728,5039673	0,599094272	728,5039673	0,512834132	728,5039673	0,569462061
728,5388794	0,766096354	728,5380859	1,319507241	728,5288696	0,657336295	728,5288696	0,568227291	728,5380859	1,199504256	728,5388794	0,731414557	728,5388794	0,881675899	728,5388794	0,92566967	728,5380859	1,213615179	728,5288696	0,651127994	728,5288696	0,489417434	728,5288696	0,589051604
728,5637817	0,576268017	728,5629883	1,134475946	728,553772	0,581325889	728,553772	0,469533741	728,5629883	1,144499063	728,5637817	0,714859426	728,5637817	0,804321468	728,5637817	0,917281926	728,5629883	0,993619919	728,553772	0,617229998	728,553772	0,414472967	728,553772	0,529927075
728,5886841	0,398719728	728,5878906	0,953712583	728,5786743	0,491291463	728,5786743	0,356177092	728,5878906	1,075383782	728,5886841	0,653407097	728,5886841	0,655745685	728,5886841	0,832800806	728,5878906	0,795768917	728,5786743	0,540971696	728,5786743	0,302542299	728,5786743	0,433985472
728,6135864	0,336030692	728,612793	0,760678113	728,6035767	0,423194826	728,6035767	0,293664277	728,612793	0,931348085	728,6135864	0,598546147	728,6135864	0,56082654	728,6135864	0,739270806	728,612793	0,611425817	728,6035767	0,483302057	728,6035767	0,248172566	728,6035767	0,376152605
728,6384888	0,239577115	728,6376953	0,494942904	728,628479	0,331685662	728,628479	0,232355371	728,6376953	0,693956137	728,6384888	0,45989719	728,6384888	0,407576412	728,6384888	0,566021562	728,6376953	0,372980326	728,628479	0,399384499	728,628479	0,212515399	728,628479	0,313088745
728,6633911	0,151005432	728,6625977	0,362822145	728,6533813	0,20986563	728,6533813	0,129102394	728,6625977	0,541989505	728,6633911	0,336201459	728,6633911	0,265597075	728,6633911	0,399839371	728,6625977	0,288450778	728,6533813	0,264964193	728,6533813	0,118225299	728,6533813	0,186797827
728,6882935	0,162908092	728,6875	0,303069562	728,6782837	0,177604944	728,6782837	0,13140741	728,6875	0,428159773	728,6882935	0,27858305	728,6882935	0,229200304	728,6882935	0,319785357	728,6875	0,265977055	728,6782837	0,206990287	728,6782837	0,103864856	728,6782837	0,154168382
728,7131958	0,143392757	728,7124023	0,188842118	728,703186	0,155262381	728,703186	0,1427726	728,7124023	0,277819037	728,7131958	0,192642257	728,7131958	0,181314483	728,7131958	0,232668921	728,7124023	0,168107912	728,703186	0,176841199	728,703186	0,132176355	728,703186	0,15193285
728,7380981	0,096178278	728,7373047	0,154041126	728,7280884	0,09607742	728,7280884	0,082034588	728,7373047	0,216800034	728,7380981	0,129740119	728,7380981	0,11546386	728,7380981	0,147576526	728,7373047	0,147367224	728,7280884	0,108544692	728,7280884	0,075253747	728,7280884	0,085886322
728,7630615	0,118518539	728,762207	0,177694649	728,7529907	0,095178731	728,7529907	0,079574779	728,762207	0,211307377	728,7630615	0,136029661	728,7630615	0,131736398	728,7630615	0,142069384	728,762207	0,176395237	728,7529907	0,098626785	728,7529907	0,064760461	728,7529907	0,080846742
728,7879639	0,136012048	728,7871094	0,115065798	728,7778931	0,110623866	728,7778931	0,107718043	728,7871094	0,135569707	728,7879639	0,13086918	728,7879639	0,133633539	728,7879639	0,147232518	728,7871094	0,108350471	728,7778931	0,109395027	728,7778931	0,097367354	728,7778931	0,106606655
728,8128662	0,073840536	728,8120117	0,088839702	728,8027954	0,066656053	728,8027954	0,060243346	728,8120117	0,108598232	728,8128662	0,086640924	728,8128662	0,08132676	728,8128662	0,093326464	728,8120117	0,088009223	728,8027954	0,069177441	728,8027954	0,059913162	728,8027954	0,062737964
728,8377686	0,053754672	728,8369141	0,128570661	728,8276978	0,062364087	728,8276978	0,051810145	728,8369141	0,133427903	728,8377686	0,075806566	728,8377686	0,062048413	728,8377686	0,077599533	728,8369141	0,127960429	728,8276978	0,059669111	728,8276978	0,046081837	728,8276978	0,049250748
728,8626709	0,091600999	728,8618164	0,117095888	728,8526001	0,087598786	728,8526001	0,092158154	728,8618164	0,108472444	728,8626709	0,092856921	728,8626709	0,093200274	728,8626709	0,098190889	728,8618164	0,114665903	728,8526001	0,083713286	728,8526001	0,089752123	728,8526001	0,084267072
728,8875732	0,068550155	728,8867188	0,071377032	728,8775024	0,073794544	728,8775024	0,079419822	728,8867188	0,069686532	728,8875732	0,057834599	728,8875732	0,067650408	728,8875732	0,064868562	728,8867188	0,072655678	728,8775024	0,07101848	728,8775024	0,089782789	728,8775024	0,077133834
728,9124756	0,053532328	728,9116211	0,092629418	728,9024048	0,05271567	728,9024048	0,052997991	728,9116211	0,092345849	728,9124756	0,04950754	728,9124756	0,044089187	728,9124756	0,050496917	728,9116211	0,099637434	728,9024048	0,049268909	728,9024048	0,052276108	728,9024048	0,046002984
728,9373779	0,115536392	728,9365234	0,121627867	728,9273071	0,079304084	728,9273071	0,095739596	728,9365234	0,104854606	728,9373779	0,075112574	728,9373779	0,078707904	728,9373779	0,079805881	728,9365234	0,145838499	728,9273071	0,068195835	728,9273071	0,078591004	728,9273071	0,070443273
728,9622803	0,162063405	728,9614258	0,087875843	728,9522705	0,093361951	728,9522705	0,155426681	728,9614258	0,067221723	728,9622803	0,059200395	728,9622803	0,079306811	728,9622803	0,066916972	728,9614258	0,158057094	728,9522705	0,080238417	728,9522705	0,13172631	728,9522705	0,096361205
728,9871826	0,328265578	728,9863281	0,153157011	728,9771729	0,07760679	728,9771729	0,222233489	728,9863281	0,092264593	728,9871826	0,050685618	728,9871826	0,083158791	728,9871826	0,058192894	728,9863281	0,348537207	728,9771729	0,058869101	728,9771729	0,153632492	728,9771729	0,070208766
729,012085	0,825400174	729,0112305	0,306319445	729,0020752	0,167937487	729,0020752	0,460301548	729,0112305	0,151032433	729,012085	0,114384443	729,012085	0,2232811	729,012085	0,122581221	729,0112305	0,676484346	729,0020752	0,097675994	729,0020752	0,305142671	729,0020752	0,139339119
729,0369873	1,458626628	729,0361328	0,413176239	729,0269775	0,311354131	729,0269775	0,761148632	729,0361328	0,175607279	729,0369873	0,195352212	729,0369873	0,482210368	729,0369873	0,212751821	729,0361328	0,909821689	729,0269775	0,173757091	729,0269775	0,541538298	729,0269775	0,277691782
729,0618896	1,968386889	729,0610352	0,555537999	729,0518799	0,424096704	729,0518799	0,898915052	729,0610352	0,279997438	729,0618896	0,374879777	729,0618896	0,860961199	729,0618896	0,375446558	729,0610352	1,090178132	729,0518799	0,239518255	729,0518799	0,654262662	729,0518799	0,38088128
729,086792	2,210020542	729,0859375	0,665055156	729,0767822	0,578019679	729,0767822	0,937473536	729,0859375	0,405666322	729,086792	0,7169047	729,086792	1,335952044	729,086792	0,66884172	729,0859375	1,143194675	729,0767822	0,369564235	729,0767822	0,697365999	729,0767822	0,529985309
729,1116943	2,061319113	729,1108398	0,594501019	729,1016846	0,644795597	729,1016846	0,886593521	729,1108398	0,402323008	729,1116943	0,990695596	729,1116943	1,626006484	729,1116943	0,880351961	729,1108398	1,009682298	729,1016846	0,484888971	729,1016846	0,69128418	729,1016846	0,63053751
729,1365967	1,833830118	729,1357422	0,546739161	729,1265869	0,565682888	729,1265869	0,7061342	729,1357422	0,396718025	729,1365967	1,087373137	729,1365967	1,621015429	729,1365967	0,927926123	729,1357422	0,930737197	729,1265869	0,466997534	729,1265869	0,566091835	729,1265869	0,554985464
729,161499	1,716201305	729,1607056	0,591896653	729,1514893	0,499584705	729,1514893	0,573421836	729,1607056	0,432822198	729,161499	1,121851325	729,161499	1,554610968	729,161499	0,948041201	729,1607056	0,927425563	729,1514893	0,42952472	729,1514893	0,461413622	729,1514893	0,480501652
729,1864014	1,588064909	729,1856079	0,514345586	729,1763916	0,466113091	729,1763916	0,49291563	729,1856079	0,398395002	729,1864014	1,087697864	729,1864014	1,501968861	729,1864014	0,960032046	729,1856079	0,744619071	729,1763916	0,412434399	729,1763916	0,418256551	729,1763916	0,455057681
729,2113037	1,257392526	729,2105103	0,414452255	729,2012939	0,385441363	729,2012939	0,379068553	729,2105103	0,358500093	729,2113037	0,953301787	729,2113037	1,366147995	729,2113037	0,892943084	729,2105103	0,576889873	729,2012939	0,35315609	729,2012939	0,340267807	729,2012939	0,383357167
729,2362061	0,900849104	729,2354126	0,392719209	729,2261963	0,299125135	729,2261963	0,275349915	729,2354126	0,371761709	729,2362061	0,854629099	729,2362061	1,143545389	729,2362061	0,817813635	729,2354126	0,51581949	729,2261963	0,280136436	729,2261963	0,237596065	729,2261963	0,285824716
729,2611084	0,714356482	729,2603149	0,342809886	729,2510986	0,253601491	729,2510986	0,252553165	729,2603149	0,33948493	729,2611084	0,762338459	729,2611084	0,963813424	729,2611084	0,734011233	729,2603149	0,443582684	729,2510986	0,246042952	729,2510986	0,211749882	729,2510986	0,244156927
729,2860107	0,549471736	729,2852173	0,231584147	729,276001	0,213083073	729,276001	0,237626299	729,2852173	0,236451209	729,2860107	0,586235225	729,2860107	0,715352714	729,2860107	0,563719392	729,2852173	0,325051069	729,276001	0,209099486	729,276001	0,214705989	729,276001	0,218199268
729,3109131	0,45091778	729,3101196	0,231927991	729,3009033	0,150765136	729,3009033	0,182237402	729,3101196	0,223294392	729,3109131	0,434846133	729,3109131	0,519380152	729,3109131	0,413278908	729,3101196	0,355811864	729,3009033	0,14100787	729,3009033	0,159378171	729,3009033	0,14287962
729,3358154	0,508475363	729,335022	0,298156917	729,3258057	0,171745598	729,3258057	0,242584184	729,335022	0,22986348	729,3358154	0,384494334	729,3358154	0,472899199	729,3358154	0,373887718	729,335022	0,464679182	729,3258057	0,145805031	729,3258057	0,198105752	729,3258057	0,160308465
729,3607178	0,592381895	729,3599243	0,311252326	729,350708	0,209779963	729,350708	0,351385593	729,3599243	0,192826793	729,3607178	0,315436572	729,3607178	0,441527009	729,3607178	0,325520366	729,3599243	0,526336253	729,350708	0,170764014	729,350708	0,294201106	729,350708	0,209301025
729,3856201	0,637625456	729,3848267	0,434752673	729,3756104	0,229678601	729,3756104	0,398691297	729,3848267	0,25254494	729,3856201	0,279090464	729,3856201	0,435073912	729,3856201	0,305184484	729,3848267	0,691744328	729,3756104	0,16423583	729,3756104	0,324675053	729,3756104	0,209025428
729,4105225	0,759017348	729,409729	0,662919283	729,4005127	0,337636888	729,4005127	0,503433406	729,409729	0,386612207	729,4105225	0,357083082	729,4105225	0,552201152	729,4105225	0,398140132	729,409729	0,94778651	729,4005127	0,234567806	729,4005127	0,406811893	729,4005127	0,293326557
729,4354248	0,80171144	729,4346313	0,831697226	729,425415	0,458842486	729,425415	0,631427288	729,4346313	0,479537725	729,4354248	0,409121007	729,4354248	0,648209333	729,4354248	0,485155016	729,4346313	1,126657009	729,425415	0,347791493	729,425415	0,536652565	729,425415	0,417916089
729,4603271	0,778469622	729,4595337	1,074235678	729,4503174	0,509380817	729,4503174	0,647754729	729,4595337	0,658230662	729,4603271	0,427359462	729,4603271	0,657170415	729,4603271	0,522033274	729,4595337	1,329358339	729,4503174	0,398241192	729,4503174	0,559453487	729,4503174	0,450001389
729,4852295	0,787568927	729,484436	1,343690515	729,4752197	0,596402645	729,4752197	0,675023258	729,484436	0,915076613	729,4852295	0,494634241	729,4852295	0,701829374	729,4852295	0,611976922	729,484436	1,501353383	729,4752197	0,48702997	729,4752197	0,569497228	729,4752197	0,515497863
729,5101929	0,817157924	729,5093384	1,369297147	729,5001221	0,683953822	729,5001221	0,675380826	729,5093384	1,06585598	729,5101929	0,59599936	729,5101929	0,80431354	729,5101929	0,760112703	729,5093384	1,367966413	729,5001221	0,609047592	729,5001221	0,594099879	729,5001221	0,61293453
729,5350952	0,684271216	729,5342407	1,267888188	729,5250244	0,630123794	729,5250244	0,524092793	729,5342407	1,116667867	729,5350952	0,615133762	729,5350952	0,799187005	729,5350952	0,832232714	729,5342407	1,167283058	729,5250244	0,626883328	729,5250244	0,4843162	729,5250244	0,578454196
729,5599976	0,506995499	729,5591431	1,171032071	729,5499878	0,544094443	729,5499878	0,399551392	729,5591431	1,158932209	729,5599976	0,627341449	729,5599976	0,728985667	729,5599976	0,848154962	729,5591431	1,016358733	729,5499878	0,594057858	729,5499878	0,358349651	729,5499878	0,496665835
729,5848999	0,427401662	729,5840454	0,960744739	729,5748901	0,499695808	729,5748901	0,352217853	729,5840454	1,081523299	729,5848999	0,635718822	729,5848999	0,671474636	729,5848999	0,840359032	729,5840454	0,776373804	729,5748901	0,574891388	729,5748901	0,313081264	729,5748901	0,472319305
729,6098022	0,291035801	729,6089478	0,650461972	729,5997925	0,393259197	729,5997925	0,269544393	729,6089478	0,849246323	729,6098022	0,523256183	729,6098022	0,520154834	729,6098022	0,695608675	729,6089478	0,48450312	729,5997925	0,481862187	729,5997925	0,253262371	729,5997925	0,384910017
729,6347046	0,179462284	729,6338501	0,461782008	729,6246948	0,248993322	729,6246948	0,141270474	729,6338501	0,676069081	729,6347046	0,403928012	729,6347046	0,3474437	729,6347046	0,512108862	729,6338501	0,3442038	729,6246948	0,328006715	729,6246948	0,136216119	729,6246948	0,234835029
729,6596069	0,178291276	729,6587524	0,357647479	729,6495972	0,193511859	729,6495972	0,129108325	729,6587524	0,52519989	729,6596069	0,33461237	729,6596069	0,282769442	729,6596069	0,413232028	729,6587524	0,285484463	729,6495972	0,248393953	729,6495972	0,109530672	729,6495972	0,182595536
729,6845093	0,150226578	729,6836548	0,208184153	729,6744995	0,15849328	729,6744995	0,138943389	729,6836548	0,3364712	729,6845093	0,228654683	729,6845093	0,21643579	729,6845093	0,290220439	729,6836548	0,160309061	729,6744995	0,196772605	729,6744995	0,127704293	729,6744995	0,165571153
729,7094116	0,096654311	729,7085571	0,152360857	729,6994019	0,095090948	729,6994019	0,078586102	729,7085571	0,248594031	729,7094116	0,137421042	729,7094116	0,132687688	729,7094116	0,178327709	729,7085571	0,132525668	729,6994019	0,114877164	729,6994019	0,07268098	729,6994019	0,091526434
729,734314	0,124793306	729,7334595	0,168923825	729,7243042	0,092686638	729,7243042	0,076753736	729,7334595	0,217005253	729,734314	0,141132876	729,734314	0,146800205	729,734314	0,162882715	729,7334595	0,158606961	729,7243042	0,098068863	729,7243042	0,065522008	729,7243042	0,081081294
729,7592163	0,120198235	729,7583618	0,101945899	729,7492065	0,099011652	729,7492065	0,095330164	729,7583618	0,13397631	729,7592163	0,114907354	729,7592163	0,130906433	729,7592163	0,130971417	729,7583618	0,092951536	729,7492065	0,10759908	729,7492065	0,093761876	729,7492065	0,103177264
729,7841187	0,082577676	729,7832642	0,075637847	729,7741089	0,054729536	729,7741089	0,046698805	729,7832642	0,103964686	729,7841187	0,084592439	729,7841187	0,088769704	729,7841187	0,091994159	729,7832642	0,073066488	729,7741089	0,065132827	729,7741089	0,052796312	729,7741089	0,056751382
729,809021	0,061004587	729,8081665	0,11726661	729,7990112	0,049153332	729,7990112	0,040288113	729,8081665	0,126144484	729,809021	0,076857537	729,809021	0,07421492	729,809021	0,080777496	729,8081665	0,116146654	729,7990112	0,05268975	729,7990112	0,03767582	729,7990112	0,043734342
729,8339233	0,092672899	729,8331299	0,088396974	729,8239136	0,072124831	729,8239136	0,077081084	729,8331299	0,088053226	729,8339233	0,090959661	729,8339233	0,105075754	729,8339233	0,098303653	729,8331299	0,08406546	729,8239136	0,072349377	729,8239136	0,074612357	729,8239136	0,074899279
729,8588257	0,064023584	729,8580322	0,064533807	729,8488159	0,046920925	729,8488159	0,049661428	729,8580322	0,070633121	729,8588257	0,058817718	729,8588257	0,070663393	729,8588257	0,066500768	729,8580322	0,061938275	729,8488159	0,049073566	729,8488159	0,060845841	729,8488159	0,050581705
729,883728	0,048227552	729,8829346	0,086975619	729,8737183	0,0433219	729,8737183	0,039606612	729,8829346	0,091488808	729,883728	0,04950773	729,883728	0,048187125	729,883728	0,051381722	729,8829346	0,087636203	729,8737183	0,040629029	729,8737183	0,042499278	729,8737183	0,035886727
729,9086304	0,082608022	729,9078369	0,11308872	729,8986206	0,062252328	729,8986206	0,064513281	729,9078369	0,101454772	729,9086304	0,07046894	729,9086304	0,076001167	729,9086304	0,08050856	729,9078369	0,111549437	729,8986206	0,057009768	729,8986206	0,06027424	729,8986206	0,057239942
729,9335327	0,083837442	729,9327393	0,06850677	729,9235229	0,071900778	729,9235229	0,092571162	729,9327393	0,065271765	729,9335327	0,053320054	729,9335327	0,067318223	729,9335327	0,066507839	729,9327393	0,071252041	729,9235229	0,068374693	729,9235229	0,09355022	729,9235229	0,078175642
729,9584351	0,093906358	729,9576416	0,087099902	729,9484253	0,045829613	729,9484253	0,082157657	729,9576416	0,078258008	729,9584351	0,040085725	729,9584351	0,052308753	729,9584351	0,050427061	729,9576416	0,12409585	729,9484253	0,04265742	729,9484253	0,067049086	729,9484253	0,046251971
729,9833374	0,291359037	729,9825439	0,15636833	729,9733276	0,080957666	729,9733276	0,208517507	729,9825439	0,105564132	729,9833374	0,073849395	729,9833374	0,099324636	729,9833374	0,083232224	729,9825439	0,270306855	729,9733276	0,064091779	729,9733276	0,134175509	729,9733276	0,075625919
730,0082397	0,61638248	730,0074463	0,174160063	729,99823	0,140456736	729,99823	0,431071132	730,0074463	0,080867246	730,0082397	0,083728641	730,0082397	0,178661942	730,0082397	0,101247609	730,0074463	0,37306121	729,99823	0,09780021	729,99823	0,287540555	729,99823	0,141276166
730,0331421	0,970140874	730,0323486	0,266092956	730,0231323	0,184909016	730,0231323	0,564939559	730,0323486	0,134315208	730,0331421	0,13253063	730,0331421	0,311846495	730,0331421	0,142413974	730,0323486	0,53601712	730,0231323	0,109428227	730,0231323	0,363079786	730,0231323	0,172514766
730,0580444	1,240642786	730,057251	0,3807033	730,0480347	0,307952136	730,0480347	0,637598217	730,057251	0,229578421	730,0580444	0,308151633	730,0580444	0,598247647	730,0580444	0,312209636	730,057251	0,643467486	730,0480347	0,196620896	730,0480347	0,424067438	730,0480347	0,283907741
730,0829468	1,224208117	730,0821533	0,333597779	730,072937	0,396761984	730,072937	0,6163432	730,0821533	0,223679945	730,0829468	0,473630458	730,0829468	0,81966418	730,0829468	0,466512054	730,0821533	0,530634046	730,072937	0,302080333	730,072937	0,459399819	730,072937	0,394149631
730,1078491	1,045884252	730,1070557	0,274768531	730,0978394	0,356075466	730,0978394	0,470465779	730,1070557	0,225744635	730,1078491	0,561254025	730,1078491	0,851806164	730,1078491	0,514667749	730,1070557	0,440197021	730,0978394	0,301793486	730,0978394	0,357746959	730,0978394	0,355648279
730,1327515	0,889696658	730,131958	0,292793334	730,1227417	0,319971919	730,1227417	0,386580229	730,131958	0,253261179	730,1327515	0,635166645	730,1327515	0,846802771	730,1327515	0,548063993	730,131958	0,44191277	730,1227417	0,287743837	730,1227417	0,287097007	730,1227417	0,309742659
730,1576538	0,797082007	730,1568604	0,231046915	730,1477051	0,312922895	730,1477051	0,371652156	730,1568604	0,197808683	730,1576538	0,652557373	730,1576538	0,805548608	730,1576538	0,554198444	730,1568604	0,350042433	730,1477051	0,283191025	730,1477051	0,293694854	730,1477051	0,310649484
730,1825562	0,652915299	730,1817627	0,176184654	730,1726074	0,242976859	730,1726074	0,269696355	730,1817627	0,15395093	730,1825562	0,533807874	730,1825562	0,667883456	730,1825562	0,457209051	730,1817627	0,279225975	730,1726074	0,227241665	730,1726074	0,221024528	730,1726074	0,242493793
730,2074585	0,523520231	730,206665	0,198689684	730,1975098	0,196537733	730,1975098	0,196910426	730,206665	0,179705933	730,2074585	0,442982048	730,2074585	0,558442533	730,2074585	0,388149977	730,206665	0,285994858	730,1975098	0,179035142	730,1975098	0,155135348	730,1975098	0,182881862
730,2324219	0,468830585	730,2315674	0,202704549	730,2224121	0,198438749	730,2224121	0,206212491	730,2315674	0,181308046	730,2324219	0,418440938	730,2324219	0,532895386	730,2324219	0,383873254	730,2315674	0,261809975	730,2224121	0,187917262	730,2224121	0,165077716	730,2224121	0,192821562
730,2573242	0,351056635	730,2564697	0,122142397	730,2473145	0,172961533	730,2473145	0,197771415	730,2564697	0,114987321	730,2573242	0,3385548	730,2573242	0,421061933	730,2573242	0,309460819	730,2564697	0,164364025	730,2473145	0,169430047	730,2473145	0,173306763	730,2473145	0,182570696
730,2822266	0,264682502	730,2813721	0,128259495	730,2722168	0,113379687	730,2722168	0,138923749	730,2813721	0,122849211	730,2822266	0,255548149	730,2822266	0,300909519	730,2822266	0,237803653	730,2813721	0,180835128	730,2722168	0,109464571	730,2722168	0,11582727	730,2722168	0,112505943
730,3071289	0,288455516	730,3062744	0,172090262	730,2971191	0,130234227	730,2971191	0,16945374	730,3062744	0,1388174	730,3071289	0,242250517	730,3071289	0,290954351	730,3071289	0,228267848	730,3062744	0,247269407	730,2971191	0,115448281	730,2971191	0,136110917	730,2971191	0,123102553
730,3320313	0,30334875	730,3311768	0,148404807	730,3220215	0,153918937	730,3220215	0,22937423	730,3311768	0,100029752	730,3320313	0,196072668	730,3320313	0,265313715	730,3320313	0,193294525	730,3311768	0,24120748	730,3220215	0,134424254	730,3220215	0,198110536	730,3220215	0,158206329
730,3569336	0,30129689	730,3560791	0,215380728	730,3469238	0,136341378	730,3469238	0,221986294	730,3560791	0,131293595	730,3569336	0,158790812	730,3569336	0,21584481	730,3569336	0,163738921	730,3560791	0,353687882	730,3469238	0,107551932	730,3469238	0,186620787	730,3469238	0,128541708
730,3818359	0,405668169	730,3809814	0,380683869	730,3718262	0,193374529	730,3718262	0,300446987	730,3809814	0,217264712	730,3818359	0,200102508	730,3818359	0,282843173	730,3818359	0,218495309	730,3809814	0,555983961	730,3718262	0,14119713	730,3718262	0,248017728	730,3718262	0,173910141
730,4067383	0,483449042	730,4058838	0,49367252	730,3967285	0,283469677	730,3967285	0,423297077	730,4058838	0,259514272	730,4067383	0,216382399	730,4067383	0,349843353	730,4067383	0,265638173	730,4058838	0,693219662	730,3967285	0,215938434	730,3967285	0,369913876	730,3967285	0,266527981
730,4316406	0,48249805	730,4307861	0,691310287	730,4216309	0,324404031	730,4216309	0,460843652	730,4307861	0,383465946	730,4316406	0,221853033	730,4316406	0,356317818	730,4316406	0,288860112	730,4307861	0,932205975	730,4216309	0,241946787	730,4216309	0,413173854	730,4216309	0,293744922
730,456543	0,541930735	730,4556885	1,007219434	730,4465332	0,419919312	730,4465332	0,561900198	730,4556885	0,606399536	730,456543	0,277745873	730,456543	0,418468982	730,456543	0,360902697	730,4556885	1,271815419	730,4465332	0,316761345	730,4465332	0,484850913	730,4465332	0,358934939
730,4814453	0,68672359	730,4805908	1,225709558	730,4714355	0,553650975	730,4714355	0,723968625	730,4805908	0,780126989	730,4814453	0,37692216	730,4814453	0,567548752	730,4814453	0,512371719	730,4805908	1,464388013	730,4714355	0,442823648	730,4714355	0,627537549	730,4714355	0,497667909
730,5063477	0,728887439	730,5054932	1,319503546	730,4963379	0,634269178	730,4963379	0,744894981	730,5054932	0,919681013	730,5063477	0,419592708	730,5063477	0,634980619	730,5063477	0,618392825	730,5054932	1,49627161	730,4963379	0,520408511	730,4963379	0,658960819	730,4963379	0,555777371
730,53125	0,706763923	730,5304565	1,402763844	730,5212402	0,675221562	730,5212402	0,688364387	730,5304565	1,105621696	730,53125	0,502829969	730,53125	0,711447716	730,53125	0,745300829	730,5304565	1,487713337	730,5212402	0,570511758	730,5212402	0,60090071	730,5212402	0,580863833
730,5561523	0,671341062	730,5553589	1,327188492	730,5461426	0,725419879	730,5461426	0,622528076	730,5553589	1,230895638	730,5561523	0,619253755	730,5561523	0,825245976	730,5561523	0,908281863	730,5553589	1,257116079	730,5461426	0,654862165	730,5461426	0,551289737	730,5461426	0,636772513
730,5810547	0,489405692	730,5802612	1,010187268	730,5710449	0,652856469	730,5710449	0,4564237	730,5802612	1,136838794	730,5810547	0,631326437	730,5810547	0,767032206	730,5810547	0,926999032	730,5802612	0,84708637	730,5710449	0,666663468	730,5710449	0,426911294	730,5710449	0,602282166
730,605957	0,306345612	730,6051636	0,742114604	730,5959473	0,449465752	730,5959473	0,250591785	730,6051636	0,990554094	730,605957	0,57638371	730,605957	0,603187025	730,605957	0,815934718	730,6051636	0,581090033	730,5959473	0,532212138	730,5959473	0,244885877	730,5959473	0,414444327
730,6308594	0,250310183	730,6300659	0,549835443	730,6208496	0,316262722	730,6208496	0,181298077	730,6300659	0,787820637	730,6308594	0,509756863	730,6308594	0,480783045	730,6308594	0,676061153	730,6300659	0,431484878	730,6208496	0,407115936	730,6208496	0,171599433	730,6208496	0,302012116
730,6557617	0,200108469	730,6549683	0,327164739	730,645752	0,226948068	730,645752	0,168345749	730,6549683	0,53672117	730,6557617	0,363886178	730,6557617	0,345304549	730,6557617	0,486826122	730,6549683	0,2470797	730,645752	0,295894861	730,645752	0,159496352	730,645752	0,23545289
730,6806641	0,126385033	730,6798706	0,225860626	730,6706543	0,125332698	730,6706543	0,094252437	730,6798706	0,389319956	730,6806641	0,244938374	730,6806641	0,213143408	730,6806641	0,31567201	730,6798706	0,182793945	730,6706543	0,170602456	730,6706543	0,091192052	730,6706543	0,124540523
730,7055664	0,145479605	730,7047729	0,214253873	730,6955566	0,10833706	730,6955566	0,087877832	730,7047729	0,314156681	730,7055664	0,205358893	730,7055664	0,187360212	730,7055664	0,252888113	730,7047729	0,188087583	730,6955566	0,128905401	730,6955566	0,075598486	730,6955566	0,099751756
730,7304688	0,134523168	730,7296753	0,133060783	730,720459	0,115537189	730,720459	0,113417163	730,7296753	0,194706455	730,7304688	0,149240196	730,7304688	0,167422637	730,7304688	0,191367477	730,7296753	0,114732772	730,720459	0,125306666	730,720459	0,107046455	730,720459	0,121858165
730,7553711	0,092800632	730,7545776	0,096659683	730,7454224	0,065112367	730,7454224	0,058430303	730,7545776	0,140810311	730,7553711	0,100614384	730,7553711	0,113434084	730,7553711	0,131379917	730,7545776	0,087368935	730,7454224	0,074853979	730,7454224	0,06182136	730,7454224	0,068577439
730,7802734	0,084133923	730,77948	0,133172378	730,7703247	0,057809085	730,7703247	0,049728729	730,77948	0,156682357	730,7802734	0,094572835	730,7802734	0,101238392	730,7802734	0,112864748	730,77948	0,12770699	730,7703247	0,060467515	730,7703247	0,042946365	730,7703247	0,049190108
730,8051758	0,116362564	730,8043823	0,095657431	730,7952271	0,076597214	730,7952271	0,082526214	730,8043823	0,108243302	730,8051758	0,109941289	730,8051758	0,129427269	730,8051758	0,127549335	730,8043823	0,087552413	730,7952271	0,076829545	730,7952271	0,083766654	730,7952271	0,084829539
730,8300781	0,079959579	730,8292847	0,069204539	730,8201294	0,051258214	730,8201294	0,05390022	730,8292847	0,080918707	730,8300781	0,071381301	730,8300781	0,09164913	730,8300781	0,088127382	730,8292847	0,067686312	730,8201294	0,055136465	730,8201294	0,058805302	730,8201294	0,054746643
730,8549805	0,057508394	730,854187	0,091619886	730,8450317	0,044798791	730,8450317	0,04228802	730,854187	0,101117916	730,8549805	0,061232112	730,8549805	0,066512123	730,8549805	0,068369791	730,854187	0,091187328	730,8450317	0,042282525	730,8450317	0,041255709	730,8450317	0,039075945
730,8798828	0,094631031	730,8790894	0,120526604	730,8699341	0,063341856	730,8699341	0,067935593	730,8790894	0,113333389	730,8798828	0,086885244	730,8798828	0,097358733	730,8798828	0,094454117	730,8790894	0,121197507	730,8699341	0,05773006	730,8699341	0,063771032	730,8699341	0,057881385
730,9047852	0,088228889	730,9039917	0,077546798	730,8948364	0,071880683	730,8948364	0,091183499	730,9039917	0,071965389	730,9047852	0,061821841	730,9047852	0,089803196	730,9047852	0,079890698	730,9039917	0,073892802	730,8948364	0,068738818	730,8948364	0,098856598	730,8948364	0,078868896
730,9296875	0,081437223	730,928894	0,096428156	730,9197388	0,046037141	730,9197388	0,059945296	730,928894	0,09335652	730,9296875	0,053189177	730,9296875	0,065512724	730,9296875	0,066584125	730,928894	0,098542251	730,9197388	0,043659743	730,9197388	0,061936453	730,9197388	0,046457872
730,9545898	0,151829571	730,9537964	0,138347849	730,9446411	0,068193279	730,9446411	0,101188086	730,9537964	0,119886085	730,9545898	0,089334466	730,9545898	0,113859721	730,9545898	0,101646043	730,9537964	0,159410551	730,9446411	0,061392251	730,9446411	0,085928358	730,9446411	0,067885831
730,9795532	0,23038964	730,9786987	0,109275073	730,9695435	0,097219162	730,9695435	0,194499075	730,9786987	0,079994395	730,9795532	0,080530994	730,9795532	0,131825417	730,9795532	0,102629088	730,9786987	0,166034773	730,9695435	0,086046979	730,9695435	0,160618439	730,9695435	0,106596224
731,0044556	0,403047919	731,0036011	0,157186449	730,9944458	0,090095699	730,9944458	0,268211812	731,0036011	0,099337868	731,0044556	0,077254184	731,0044556	0,13987729	731,0044556	0,09447436	731,0036011	0,293447256	730,9944458	0,063924477	730,9944458	0,189182088	730,9944458	0,088837974
731,0293579	0,723407805	731,0285034	0,273807764	731,0193481	0,172564417	731,0193481	0,417027384	731,0285034	0,159843549	731,0293579	0,14512983	731,0293579	0,28729859	731,0293579	0,167368025	731,0285034	0,458488405	731,0193481	0,103273682	731,0193481	0,286350816	731,0193481	0,153602928
731,0542603	0,903878689	731,0534058	0,272887141	731,0442505	0,281138688	731,0442505	0,518366039	731,0534058	0,157611579	731,0542603	0,228997707	731,0542603	0,47917819	731,0542603	0,26206094	731,0534058	0,439353615	731,0442505	0,187823027	731,0442505	0,39006415	731,0442505	0,272227854
731,0791626	0,857801259	731,0783081	0,264187604	731,0691528	0,298977643	731,0691528	0,435632765	731,0783081	0,188950881	731,0791626	0,298191041	731,0791626	0,589721978	731,0791626	0,327359825	731,0783081	0,388080686	731,0691528	0,217429355	731,0691528	0,34382391	731,0691528	0,284877896
731,1040649	0,77381742	731,1032104	0,293277055	731,0940552	0,300098181	731,0940552	0,368935734	731,1032104	0,243556798	731,1040649	0,410975575	731,1040649	0,663671553	731,1040649	0,410015672	731,1032104	0,393366069	731,0940552	0,246573642	731,0940552	0,280124068	731,0940552	0,283771008
731,1289673	0,674704671	731,1281128	0,232551649	731,1189575	0,303693235	731,1189575	0,380236268	731,1281128	0,195693314	731,1289673	0,52085036	731,1289673	0,706062794	731,1289673	0,494908571	731,1281128	0,322438568	731,1189575	0,274222672	731,1189575	0,300860792	731,1189575	0,306216568
731,1538696	0,557574809	731,1530151	0,183190495	731,1438599	0,252714008	731,1438599	0,301307648	731,1530151	0,157854766	731,1538696	0,463532358	731,1538696	0,586634874	731,1538696	0,431525439	731,1530151	0,274835289	731,1438599	0,226596922	731,1438599	0,245317072	731,1438599	0,24841775
731,178772	0,502537549	731,1779175	0,214760497	731,1687622	0,214858219	731,1687622	0,237454101	731,1779175	0,182614893	731,178772	0,392981857	731,178772	0,471083641	731,178772	0,354772151	731,1779175	0,317351788	731,1687622	0,187495634	731,1687622	0,183711752	731,1687622	0,199000016
731,2036743	0,525846422	731,2028198	0,242810071	731,1936646	0,232825279	731,1936646	0,248610094	731,2028198	0,192796409	731,2036743	0,375806659	731,2036743	0,48999846	731,2036743	0,349685162	731,2028198	0,324452043	731,1936646	0,208600119	731,1936646	0,197020844	731,1936646	0,217841253
731,2285767	0,438237399	731,2277832	0,175020501	731,2185669	0,211830065	731,2185669	0,23046425	731,2277832	0,144910291	731,2285767	0,315305889	731,2285767	0,43654713	731,2285767	0,309811145	731,2277832	0,227666587	731,2185669	0,196407259	731,2185669	0,200196311	731,2185669	0,212940589
731,253479	0,319005132	731,2526855	0,177600309	731,2434692	0,146327302	731,2434692	0,149087265	731,2526855	0,165340826	731,253479	0,2710751	731,253479	0,360864639	731,253479	0,268264979	731,2526855	0,226773754	731,2434692	0,138742685	731,2434692	0,126026601	731,2434692	0,138895422
731,2783813	0,312672317	731,2775879	0,210497037	731,2683716	0,149147362	731,2683716	0,159397393	731,2775879	0,184287816	731,2783813	0,275739461	731,2783813	0,352132052	731,2783813	0,273467869	731,2775879	0,261526227	731,2683716	0,139882326	731,2683716	0,128153265	731,2683716	0,138878182
731,3032837	0,283230782	731,3024902	0,160649002	731,2932739	0,152995691	731,2932739	0,19365418	731,3024902	0,127638236	731,3032837	0,23203598	731,3032837	0,300655335	731,3032837	0,227720454	731,3024902	0,224409238	731,2932739	0,144368112	731,2932739	0,17276223	731,2932739	0,160775244
731,328186	0,261803657	731,3273926	0,206609026	731,3181763	0,118566446	731,3181763	0,184824646	731,3273926	0,1464919	731,328186	0,179929227	731,328186	0,220274478	731,328186	0,177872404	731,3273926	0,332459807	731,3181763	0,101928979	731,3181763	0,153663591	731,3181763	0,112988353
731,3530884	0,385367334	731,3522949	0,386298448	731,3431396	0,170274585	731,3431396	0,310177833	731,3522949	0,217514515	731,3530884	0,202773958	731,3530884	0,260062993	731,3530884	0,212721914	731,3522949	0,585292041	731,3431396	0,123376675	731,3431396	0,236460686	731,3431396	0,145177484
731,3779907	0,508844554	731,3771973	0,546552956	731,368042	0,281815857	731,368042	0,497665673	731,3771973	0,259179264	731,3779907	0,202352643	731,3779907	0,329899609	731,3779907	0,246324152	731,3771973	0,772552252	731,368042	0,191212282	731,368042	0,386336178	731,368042	0,253324598
731,4028931	0,556085527	731,4020996	0,785981834	731,3929443	0,374771655	731,3929443	0,548780322	731,4020996	0,407967657	731,4028931	0,202369869	731,4028931	0,360470027	731,4028931	0,273906887	731,4020996	1,016743898	731,3929443	0,242087215	731,3929443	0,448353559	731,3929443	0,31581974
731,4277954	0,623964965	731,427002	1,120044708	731,4178467	0,491535515	731,4178467	0,623380482	731,427002	0,654508531	731,4277954	0,278532058	731,4277954	0,456272781	731,4277954	0,373976558	731,427002	1,359937787	731,4178467	0,352539927	731,4178467	0,52078867	731,4178467	0,407120705
731,4526978	0,764773369	731,4519043	1,389713645	731,442749	0,613100946	731,442749	0,786894202	731,4519043	0,852698207	731,4526978	0,420894086	731,4526978	0,628898978	731,4526978	0,562366366	731,4519043	1,656280518	731,442749	0,496239841	731,442749	0,695042372	731,442749	0,544719875
731,4776001	0,865097225	731,4768066	1,603209853	731,4676514	0,703004599	731,4676514	0,909879863	731,4768066	1,010047317	731,4776001	0,484984726	731,4776001	0,707253575	731,4776001	0,68555057	731,4768066	1,882420301	731,4676514	0,573493898	731,4676514	0,811534822	731,4676514	0,618544161
731,5025024	1,063106179	731,501709	1,877201676	731,4925537	0,795494795	731,4925537	0,974982142	731,501709	1,26137948	731,5025024	0,576425731	731,5025024	0,818792999	731,5025024	0,822272003	731,501709	2,150142908	731,4925537	0,636109233	731,4925537	0,864633739	731,4925537	0,674964368
731,5274048	1,391930461	731,5266113	2,098308325	731,5174561	0,945195138	731,5174561	1,041393399	731,5266113	1,552086473	731,5274048	0,718208611	731,5274048	1,043867469	731,5274048	1,042952776	731,5266113	2,284015179	731,5174561	0,7749663	731,5174561	0,922141373	731,5174561	0,809614599
731,5523071	1,622673273	731,5515137	1,987103581	731,5423584	1,010524273	731,5423584	0,945772648	731,5515137	1,675862193	731,5523071	0,819413841	731,5523071	1,251971245	731,5523071	1,217148781	731,5515137	2,049307823	731,5423584	0,906657815	731,5423584	0,864067137	731,5423584	0,896675646
731,5772095	1,555989385	731,576416	1,750926495	731,5672607	0,884592295	731,5672607	0,664117515	731,576416	1,721206069	731,5772095	0,940027893	731,5772095	1,435647845	731,5772095	1,350130558	731,576416	1,662866592	731,5672607	0,889494598	731,5672607	0,623178124	731,5672607	0,786158264
731,6021118	1,177084446	731,6013184	1,364968181	731,5921631	0,708583832	731,5921631	0,444985628	731,6013184	1,592286229	731,6021118	1,086053133	731,6021118	1,592776299	731,6021118	1,482945561	731,6013184	1,152673364	731,5921631	0,798372388	731,5921631	0,424698293	731,5921631	0,646810651
731,6270142	0,69458586	731,6262207	0,857583582	731,6170654	0,491917729	731,6170654	0,307540178	731,6262207	1,240632653	731,6270142	1,071539164	731,6270142	1,333006501	731,6270142	1,395283818	731,6262207	0,65598309	731,6170654	0,617506027	731,6170654	0,300296932	731,6170654	0,478490621
731,6519165	0,380770385	731,651123	0,540720999	731,6419678	0,276840985	731,6419678	0,162913948	731,651123	0,893243194	731,6519165	0,810210586	731,6519165	0,815232515	731,6519165	1,017772913	731,651123	0,426277429	731,6419678	0,379954219	731,6419678	0,163064018	731,6419678	0,271006376
731,6768188	0,289144844	731,6760254	0,40826878	731,6668701	0,193926394	731,6668701	0,138202548	731,6760254	0,643467903	731,6768188	0,553073823	731,6768188	0,509513617	731,6768188	0,669536352	731,6760254	0,34857294	731,6668701	0,251272917	731,6668701	0,119138621	731,6668701	0,183823273
731,7017822	0,234478265	731,7009277	0,252306759	731,6917725	0,164923355	731,6917725	0,152105138	731,7009277	0,411602885	731,7017822	0,339011341	731,7017822	0,347116649	731,7017822	0,418308288	731,7009277	0,215961576	731,6917725	0,1996613	731,6917725	0,144588038	731,6917725	0,171171352
731,7266846	0,165698707	731,7258301	0,176109865	731,7166748	0,10130965	731,7166748	0,08418975	731,7258301	0,285528719	731,7266846	0,225803316	731,7266846	0,228455469	731,7266846	0,278526962	731,7258301	0,156120151	731,7166748	0,122982897	731,7166748	0,083933875	731,7166748	0,099103287
731,7515869	0,144849285	731,7507324	0,197433859	731,7415771	0,086309314	731,7415771	0,068338454	731,7507324	0,255375803	731,7515869	0,185878456	731,7515869	0,186485022	731,7515869	0,223636568	731,7507324	0,188709095	731,7415771	0,093690149	731,7415771	0,058225393	731,7415771	0,073893569
731,7764893	0,165772498	731,7756348	0,139622882	731,7664795	0,100163326	731,7664795	0,101829708	731,7756348	0,178180575	731,7764893	0,179475203	731,7764893	0,200458258	731,7764893	0,2039738	731,7756348	0,133405998	731,7664795	0,107074618	731,7664795	0,093920134	731,7664795	0,09988153
731,8013916	0,116202079	731,8005371	0,098433875	731,7913818	0,066077515	731,7913818	0,062847711	731,8005371	0,128568158	731,8013916	0,124081112	731,8013916	0,146480501	731,8013916	0,139421582	731,8005371	0,09611623	731,7913818	0,072721101	731,7913818	0,068478718	731,7913818	0,065468095
731,8262939	0,091852129	731,8254395	0,123096459	731,8162842	0,051076766	731,8162842	0,042987254	731,8254395	0,146254018	731,8262939	0,100799911	731,8262939	0,097098753	731,8262939	0,107271694	731,8254395	0,122910589	731,8162842	0,053327806	731,8162842	0,044127211	731,8162842	0,04439725
731,8511963	0,127347067	731,8503418	0,143546432	731,8411865	0,069534749	731,8411865	0,070101857	731,8503418	0,145149693	731,8511963	0,11513897	731,8511963	0,128252327	731,8511963	0,126847744	731,8503418	0,14390561	731,8411865	0,069440551	731,8411865	0,062503353	731,8411865	0,063238561
731,8760986	0,110340625	731,8752441	0,088033587	731,8660889	0,070662327	731,8660889	0,085539162	731,8752441	0,091916643	731,8760986	0,08387839	731,8760986	0,102627873	731,8760986	0,097687438	731,8752441	0,089883909	731,8660889	0,075141877	731,8660889	0,089315012	731,8660889	0,079653859
731,901001	0,08440192	731,9001465	0,10429664	731,8909912	0,042668175	731,8909912	0,047839049	731,9001465	0,107993223	731,901001	0,067320466	731,901001	0,075723194	731,901001	0,075546049	731,9001465	0,111635275	731,8909912	0,043352582	731,8909912	0,052105058	731,8909912	0,0426795
731,9259033	0,133419022	731,9251099	0,144572526	731,9158936	0,065981671	731,9158936	0,082460731	731,9251099	0,130918667	731,9259033	0,096803285	731,9259033	0,112989232	731,9259033	0,106553815	731,9251099	0,157375664	731,9158936	0,058479197	731,9158936	0,07171642	731,9158936	0,060317054
731,9508057	0,145195663	731,9500122	0,096750379	731,9408569	0,088133119	731,9408569	0,132877856	731,9500122	0,082542844	731,9508057	0,087116838	731,9508057	0,115809053	731,9508057	0,102584414	731,9500122	0,109937549	731,9408569	0,080879673	731,9408569	0,123956457	731,9408569	0,094057202
731,975708	0,1379942	731,9749146	0,108344853	731,9657593	0,063579828	731,9657593	0,121276334	731,9749146	0,094863653	731,975708	0,072697096	731,975708	0,092231579	731,975708	0,080905691	731,9749146	0,13971962	731,9657593	0,054962635	731,9657593	0,098934501	731,9657593	0,064867854
732,0006104	0,261471003	731,9998169	0,17515333	731,9906616	0,094913892	731,9906616	0,193663359	731,9998169	0,13473852	732,0006104	0,111252405	732,0006104	0,145925045	732,0006104	0,120444931	731,9998169	0,232912734	731,9906616	0,072728306	731,9906616	0,135834679	731,9906616	0,087235726
732,0255127	0,394954264	732,0247192	0,149804249	732,015564	0,149831444	732,015564	0,297833055	732,0247192	0,104490153	732,0255127	0,123395883	732,0255127	0,199852541	732,0255127	0,135393679	732,0247192	0,222648025	732,015564	0,116084613	732,015564	0,224495679	732,015564	0,158124849
732,050415	0,415209085	732,0496216	0,158316702	732,0404663	0,153032735	732,0404663	0,279580444	732,0496216	0,116309673	732,050415	0,120347291	732,050415	0,213920638	732,050415	0,13166143	732,0496216	0,231359407	732,0404663	0,110229582	732,0404663	0,210382909	732,0404663	0,151525736
732,0753174	0,433192372	732,0745239	0,219978511	732,0653687	0,183113307	732,0653687	0,258200675	732,0745239	0,171744555	732,0753174	0,160675704	732,0753174	0,267718911	732,0753174	0,172487706	732,0745239	0,291986585	732,0653687	0,138836339	732,0653687	0,191804737	732,0653687	0,16752468
732,1002197	0,455993563	732,0994263	0,182945028	732,090271	0,219214037	732,090271	0,295260012	732,0994263	0,14752771	732,1002197	0,254440546	732,1002197	0,380870104	732,1002197	0,259150416	732,0994263	0,247703075	732,090271	0,187068552	732,090271	0,23688893	732,090271	0,220729142
732,1251221	0,380346298	732,1243286	0,143488452	732,1151733	0,195990011	732,1151733	0,269416869	732,1243286	0,121644005	732,1251221	0,253440917	732,1251221	0,360941082	732,1251221	0,252203792	732,1243286	0,212300971	732,1151733	0,175989017	732,1151733	0,228388056	732,1151733	0,196410671
732,1500244	0,336558789	732,149231	0,183515891	732,1400757	0,166659743	732,1400757	0,238430351	732,149231	0,151903272	732,1500244	0,247839347	732,1500244	0,307059467	732,1500244	0,230032951	732,149231	0,263529956	732,1400757	0,144933447	732,1400757	0,192584679	732,1400757	0,162253484
732,1749268	0,383019686	732,1741333	0,2155063	732,164978	0,204556212	732,164978	0,257996112	732,1741333	0,165186927	732,1749268	0,261082888	732,1749268	0,334480226	732,1749268	0,24839437	732,1741333	0,298350811	732,164978	0,169257864	732,164978	0,205938116	732,164978	0,189747289
732,1998291	0,343013972	732,1990356	0,152657092	732,1898804	0,209965289	732,1898804	0,238821968	732,1990356	0,119035758	732,1998291	0,217587084	732,1998291	0,313212603	732,1998291	0,216939181	732,1990356	0,208012283	732,1898804	0,18087934	732,1898804	0,205924183	732,1898804	0,209385633
732,2247314	0,256979913	732,223938	0,158507943	732,2147827	0,152450144	732,2147827	0,149138346	732,223938	0,141793817	732,2247314	0,183973938	732,2247314	0,26241976	732,2247314	0,185132176	732,223938	0,204730153	732,2147827	0,139957145	732,2147827	0,129145607	732,2147827	0,142479897
732,2496338	0,260824323	732,2488403	0,186337397	732,2396851	0,155257404	732,2396851	0,151153982	732,2488403	0,165285185	732,2496338	0,209465563	732,2496338	0,280324966	732,2496338	0,215567365	732,2488403	0,222227395	732,2396851	0,144956306	732,2396851	0,122023597	732,2396851	0,140529767
732,2745361	0,220112398	732,2737427	0,122015946	732,2645874	0,150562271	732,2645874	0,170267195	732,2737427	0,111494832	732,2745361	0,178596899	732,2745361	0,245289952	732,2745361	0,188340425	732,2737427	0,152215689	732,2645874	0,146763295	732,2645874	0,155395538	732,2645874	0,154274583
732,2994385	0,159210414	732,298645	0,128213257	732,2894897	0,100957431	732,2894897	0,120172195	732,298645	0,114892319	732,2994385	0,139343157	732,2994385	0,169983447	732,2994385	0,140756294	732,298645	0,174555525	732,2894897	0,095776752	732,2894897	0,109363303	732,2894897	0,099859767
732,3243408	0,210977256	732,3235474	0,212693661	732,3143921	0,113527358	732,3143921	0,154685467	732,3235474	0,152230129	732,3243408	0,160848707	732,3243408	0,18598868	732,3243408	0,153877318	732,3235474	0,307678342	732,3143921	0,09938217	732,3143921	0,128571972	732,3143921	0,10560248
732,3492432	0,268510461	732,3484497	0,270456105	732,3392944	0,162436202	732,3392944	0,26741755	732,3484497	0,137910038	732,3492432	0,158908382	732,3492432	0,206087649	732,3492432	0,166762874	732,3484497	0,43760258	732,3392944	0,134720027	732,3392944	0,22926265	732,3392944	0,159644157
732,3741455	0,284358799	732,3733521	0,480640501	732,3641968	0,186244547	732,3641968	0,347690761	732,3733521	0,212650076	732,3741455	0,121212751	732,3741455	0,179035589	732,3741455	0,141713068	732,3733521	0,74703747	732,3641968	0,126250267	732,3641968	0,295042783	732,3641968	0,165650114
732,3990479	0,413071752	732,3982544	0,910460949	732,3890991	0,312144876	732,3890991	0,545283377	732,3982544	0,431169569	732,3990479	0,152181447	732,3990479	0,235175908	732,3990479	0,190007344	732,3982544	1,267147541	732,3890991	0,19109194	732,3890991	0,450433582	732,3890991	0,249843672
732,4239502	0,628083169	732,4231567	1,256684542	732,4140015	0,534308553	732,4140015	0,867422104	732,4231567	0,612092137	732,4239502	0,249130607	732,4239502	0,407965302	732,4239502	0,341145873	732,4231567	1,636320949	732,4140015	0,355983198	732,4140015	0,743898392	732,4140015	0,461573094
732,4489136	0,787236571	732,4480591	1,58458209	732,4389038	0,704909682	732,4389038	1,038833857	732,4480591	0,848584354	732,4489136	0,328053087	732,4489136	0,557673395	732,4489136	0,493581921	732,4480591	1,924152613	732,4389038	0,48817879	732,4389038	0,916116118	732,4389038	0,60990572
732,4738159	0,910427332	732,4729614	2,024375677	732,4638062	0,875644088	732,4638062	1,102643967	732,4729614	1,290551186	732,4738159	0,466149062	732,4738159	0,734987199	732,4738159	0,718242764	732,4729614	2,209802151	732,4638062	0,642008066	732,4638062	0,977472603	732,4638062	0,750686049
732,4987183	0,992418826	732,4978638	2,200406313	732,4887085	1,109546781	732,4887085	1,09583807	732,4978638	1,656696916	732,4987183	0,675969899	732,4987183	0,960929096	732,4987183	1,020679712	732,4978638	2,162763119	732,4887085	0,922236443	732,4887085	0,989518881	732,4887085	0,974260032
732,5236206	0,915178955	732,5227661	1,986739278	732,5136108	1,12658	732,5136108	0,929030359	732,5227661	1,772629023	732,5236206	0,795620441	732,5236206	1,028959632	732,5236206	1,185319066	732,5227661	1,790437818	732,5136108	1,09375906	732,5136108	0,86547035	732,5136108	1,031177282
732,5485229	0,775835097	732,5476685	1,67079246	732,5385742	0,939509213	732,5385742	0,638763309	732,5476685	1,749667168	732,5485229	0,832446337	732,5485229	0,959884822	732,5485229	1,203270435	732,5476685	1,423398376	732,5385742	1,029335499	732,5385742	0,610551059	732,5385742	0,865397573
732,5734253	0,710139573	732,5725708	1,332324982	732,5634766	0,743179858	732,5634766	0,45928207	732,5725708	1,565621734	732,5734253	0,837917209	732,5734253	0,917633414	732,5734253	1,155847549	732,5725708	1,082445979	732,5634766	0,892425001	732,5634766	0,435156614	732,5634766	0,691602647
732,5983276	0,528227925	732,5974731	0,901766539	732,5883789	0,538084745	732,5883789	0,328620642	732,5974731	1,222039223	732,5983276	0,723372042	732,5983276	0,808208048	732,5983276	0,994106531	732,5974731	0,673966527	732,5883789	0,701329887	732,5883789	0,328951627	732,5883789	0,526197791
732,62323	0,30424574	732,6224365	0,608427465	732,6132813	0,324216306	732,6132813	0,178833991	732,6224365	0,933943629	732,62323	0,585769236	732,62323	0,587518811	732,62323	0,777139485	732,6224365	0,441913396	732,6132813	0,457519144	732,6132813	0,186451152	732,6132813	0,316434443
732,6481323	0,234889999	732,6473389	0,459536701	732,6381836	0,2238013	732,6381836	0,138155177	732,6473389	0,702610075	732,6481323	0,479815662	732,6481323	0,428845674	732,6481323	0,603529215	732,6473389	0,354626566	732,6381836	0,311099201	732,6381836	0,128865972	732,6381836	0,215266883
732,6730347	0,210063905	732,6722412	0,282688946	732,6630859	0,184889972	732,6630859	0,153964967	732,6722412	0,45853731	732,6730347	0,367080271	732,6730347	0,344982862	732,6730347	0,468118697	732,6722412	0,213054314	732,6630859	0,238294527	732,6630859	0,146007597	732,6630859	0,191322252
732,697937	0,144917622	732,6971436	0,189934507	732,6879883	0,112838492	732,6879883	0,089517027	732,6971436	0,319575369	732,697937	0,240508318	732,697937	0,228334874	732,697937	0,314132959	732,6971436	0,15627417	732,6879883	0,144356981	732,6879883	0,090615086	732,6879883	0,111553334
732,7228394	0,105608746	732,7220459	0,202390417	732,7128906	0,095387101	732,7128906	0,070660576	732,7220459	0,276739359	732,7228394	0,176227301	732,7228394	0,15229404	732,7228394	0,214718491	732,7220459	0,184614211	732,7128906	0,108791314	732,7128906	0,062970378	732,7128906	0,084365055
732,7477417	0,138248175	732,7469482	0,169375136	732,737793	0,10996291	732,737793	0,10245119	732,7469482	0,215691283	732,7477417	0,162075117	732,7477417	0,167734057	732,7477417	0,194541425	732,7469482	0,154393643	732,737793	0,119836375	732,737793	0,098477833	732,737793	0,114253677
732,772644	0,09843576	732,7718506	0,109292597	732,7626953	0,086942792	732,7626953	0,080010079	732,7718506	0,150814146	732,772644	0,108957976	732,772644	0,118312761	732,772644	0,136265025	732,7718506	0,09579064	732,7626953	0,096090645	732,7626953	0,087521113	732,7626953	0,091444075
732,7975464	0,066005908	732,7967529	0,123779237	732,7875977	0,05601925	732,7875977	0,047803104	732,7967529	0,154625937	732,7975464	0,086488247	732,7975464	0,086553238	732,7975464	0,101929083	732,7967529	0,116579697	732,7875977	0,064143889	732,7875977	0,048625831	732,7875977	0,050670523
732,8224487	0,103974193	732,8216553	0,141260818	732,8125	0,077401921	732,8125	0,069995403	732,8216553	0,150834337	732,8224487	0,110051885	732,8224487	0,113717742	732,8224487	0,127104118	732,8216553	0,136164904	732,8125	0,076398447	732,8125	0,060978174	732,8125	0,066288486
732,8473511	0,084688313	732,8465576	0,085765146	732,8374023	0,078622766	732,8374023	0,085077599	732,8465576	0,095062934	732,8473511	0,078964204	732,8473511	0,093156725	732,8473511	0,093139239	732,8465576	0,077745594	732,8374023	0,08071024	732,8374023	0,084250644	732,8374023	0,083091401
732,8722534	0,057748184	732,87146	0,09986572	732,8623047	0,044802047	732,8623047	0,04592238	732,87146	0,106798559	732,8722534	0,062017895	732,8722534	0,058390018	732,8722534	0,067841843	732,87146	0,095311873	732,8623047	0,047557276	732,8623047	0,044439197	732,8623047	0,042295221
732,8971558	0,095572554	732,8963623	0,137843996	732,887207	0,066433728	732,887207	0,067969024	732,8963623	0,127676994	732,8971558	0,087647445	732,8971558	0,086188763	732,8971558	0,097791001	732,8963623	0,133256301	732,887207	0,062727325	732,887207	0,060101535	732,887207	0,057682067
732,9220581	0,104605049	732,9212646	0,085880518	732,9121094	0,083744444	732,9121094	0,099674657	732,9212646	0,08285512	732,9220581	0,073620006	732,9220581	0,092769459	732,9220581	0,091125742	732,9212646	0,080744758	732,9121094	0,080042407	732,9121094	0,104858056	732,9121094	0,090923518
732,9469604	0,074186102	732,946167	0,09031406	732,9370117	0,052132417	732,9370117	0,071143508	732,946167	0,090898849	732,9469604	0,056157295	732,9469604	0,067769624	732,9469604	0,069669411	732,946167	0,091954	732,9370117	0,052318275	732,9370117	0,069553427	732,9370117	0,054881051
732,9718628	0,109693833	732,9710693	0,140418038	732,9619141	0,075176507	732,9619141	0,111151353	732,9710693	0,123049088	732,9718628	0,08447928	732,9718628	0,089682154	732,9718628	0,09276785	732,9710693	0,157324299	732,9619141	0,065599114	732,9619141	0,083533622	732,9619141	0,068326287
732,9967651	0,157478392	732,9959717	0,105812371	732,9868164	0,111326262	732,9868164	0,196219176	732,9959717	0,086832173	732,9967651	0,099864319	732,9967651	0,122621834	732,9967651	0,113810517	732,9959717	0,127201468	732,9868164	0,096688516	732,9868164	0,160675079	732,9868164	0,115805179
733,0216675	0,172520667	733,020874	0,107525982	733,0117188	0,102687143	733,0117188	0,204834372	733,020874	0,086359978	733,0216675	0,071045138	733,0216675	0,099703014	733,0216675	0,086187586	733,020874	0,144774675	733,0117188	0,078599676	733,0117188	0,157149091	733,0117188	0,099352457
733,0465698	0,229723752	733,0457764	0,171840042	733,0366211	0,14143084	733,0366211	0,241885275	733,0457764	0,137568578	733,0465698	0,088722326	733,0465698	0,123930931	733,0465698	0,097705036	733,0457764	0,21837233	733,0366211	0,098871797	733,0366211	0,171392024	733,0366211	0,128241017
733,0714722	0,326139182	733,0706787	0,176770687	733,0615234	0,201681748	733,0615234	0,298145264	733,0706787	0,133461952	733,0714722	0,148591965	733,0714722	0,221357733	733,0714722	0,154221416	733,0706787	0,221531421	733,0615234	0,156036764	733,0615234	0,228712618	733,0615234	0,196125627
733,0963745	0,291219115	733,0955811	0,126375288	733,0864258	0,193365946	733,0864258	0,274496973	733,0955811	0,104761578	733,0963745	0,149359822	733,0963745	0,236566335	733,0963745	0,154068157	733,0955811	0,159822479	733,0864258	0,162309632	733,0864258	0,226804048	733,0864258	0,200890973
733,1212769	0,245940045	733,1204834	0,150335595	733,1113281	0,165101543	733,1113281	0,212688521	733,1204834	0,133415475	733,1212769	0,16529429	733,1212769	0,215995774	733,1212769	0,159850314	733,1204834	0,186122447	733,1113281	0,138792336	733,1113281	0,168763727	733,1113281	0,15654467
733,1461792	0,282958269	733,1453857	0,180142358	733,1362915	0,192845851	733,1362915	0,235306069	733,1453857	0,145910323	733,1461792	0,209082767	733,1461792	0,266064912	733,1461792	0,200977415	733,1453857	0,209710762	733,1362915	0,166297048	733,1362915	0,182707384	733,1362915	0,184050098
733,1710815	0,254199624	733,1702881	0,11771933	733,1611938	0,196334288	733,1611938	0,229956418	733,1702881	0,099567473	733,1710815	0,173697457	733,1710815	0,233908162	733,1710815	0,173528939	733,1702881	0,141538158	733,1611938	0,176828131	733,1611938	0,199369743	733,1611938	0,199973717
733,1960449	0,192194372	733,1951904	0,132096589	733,1860962	0,146092027	733,1860962	0,149624005	733,1951904	0,120137624	733,1960449	0,147568271	733,1960449	0,1819686	733,1960449	0,142638743	733,1951904	0,158528045	733,1860962	0,13265188	733,1860962	0,128901824	733,1860962	0,139141902
733,2209473	0,212567508	733,2200928	0,163532957	733,2109985	0,15205875	733,2109985	0,149187014	733,2200928	0,14417547	733,2209473	0,176459759	733,2209473	0,218013927	733,2209473	0,166835025	733,2200928	0,185281783	733,2109985	0,143374979	733,2109985	0,121571638	733,2109985	0,140645176
733,2458496	0,180850446	733,2449951	0,103017353	733,2359009	0,152603239	733,2359009	0,162317738	733,2449951	0,096571892	733,2458496	0,149574101	733,2458496	0,197946668	733,2458496	0,148952261	733,2449951	0,118290499	733,2359009	0,147829309	733,2359009	0,14630577	733,2359009	0,159423113
733,270752	0,122812398	733,2698975	0,10633491	733,2608032	0,099482365	733,2608032	0,108304575	733,2698975	0,10177061	733,270752	0,114699095	733,270752	0,133308008	733,270752	0,111870825	733,2698975	0,127735347	733,2608032	0,099312454	733,2608032	0,096646428	733,2608032	0,097241007
733,2956543	0,142540395	733,2948608	0,164413199	733,2857056	0,107972153	733,2857056	0,122690983	733,2948608	0,137704834	733,2956543	0,135525256	733,2956543	0,145425841	733,2956543	0,130711243	733,2948608	0,194311023	733,2857056	0,099494182	733,2857056	0,099383317	733,2857056	0,100752592
733,3205566	0,171088949	733,3197632	0,156131849	733,3106079	0,138517618	733,3106079	0,183959365	733,3197632	0,104556225	733,3205566	0,138469875	733,3205566	0,166008681	733,3205566	0,144120038	733,3197632	0,21640031	733,3106079	0,128240213	733,3106079	0,169813842	733,3106079	0,141767368
733,345459	0,153408915	733,3446655	0,252159238	733,3355103	0,124731041	733,3355103	0,196506336	733,3446655	0,131493762	733,345459	0,092470929	733,345459	0,129182309	733,345459	0,105426334	733,3446655	0,371742278	733,3355103	0,102089033	733,3355103	0,180086315	733,3355103	0,115553968
733,3703613	0,206664667	733,3695679	0,467080861	733,3604126	0,151310578	733,3604126	0,269165933	733,3695679	0,233130723	733,3703613	0,102675967	733,3703613	0,133280724	733,3703613	0,120011926	733,3695679	0,64259541	733,3604126	0,108371727	733,3604126	0,230984196	733,3604126	0,124067217
733,3952637	0,358442843	733,3944702	0,718941867	733,3853149	0,245300561	733,3853149	0,438907564	733,3944702	0,3242248	733,3952637	0,157921553	733,3952637	0,236407131	733,3952637	0,198531196	733,3944702	0,929276168	733,3853149	0,168515354	733,3853149	0,38140884	733,3853149	0,215060815
733,420166	0,456570894	733,4193726	1,092875361	733,4102173	0,397920102	733,4102173	0,659881413	733,4193726	0,513992429	733,420166	0,171821535	733,420166	0,301181942	733,420166	0,264316469	733,4193726	1,301927567	733,4102173	0,263380408	733,4102173	0,600356877	733,4102173	0,35374552
733,4450684	0,582792819	733,4442749	1,559131861	733,4351196	0,57670635	733,4351196	0,81308049	733,4442749	0,874055028	733,4450684	0,254872233	733,4450684	0,410874456	733,4450684	0,405559301	733,4442749	1,692703247	733,4351196	0,389152557	733,4351196	0,73195076	733,4351196	0,486420304
733,4699707	0,748184264	733,4691772	1,862442255	733,460022	0,823610544	733,460022	0,930893779	733,4691772	1,241943717	733,4699707	0,41761902	733,4699707	0,626833141	733,4699707	0,651816607	733,4691772	1,854286551	733,460022	0,622843742	733,460022	0,833227932	733,460022	0,701724052
733,494873	0,733798325	733,4940796	1,821533799	733,4849243	0,944361567	733,4849243	0,8774755	733,4940796	1,446953654	733,494873	0,523947477	733,494873	0,742184222	733,494873	0,84086746	733,4940796	1,650903344	733,4849243	0,819848359	733,4849243	0,817278385	733,4849243	0,836589456
733,5197754	0,61596334	733,5189819	1,643790364	733,5098267	0,86531359	733,5098267	0,643073261	733,5189819	1,548193574	733,5197754	0,615062058	733,5197754	0,760572374	733,5197754	0,947622061	733,5189819	1,393214107	733,5098267	0,859437406	733,5098267	0,613566458	733,5098267	0,766933203
733,5446777	0,589197099	733,5438843	1,374531269	733,534729	0,740235806	733,534729	0,490002453	733,5438843	1,477842927	733,5446777	0,686748028	733,5446777	0,773483455	733,5446777	0,995325685	733,5438843	1,119729042	733,534729	0,823275268	733,534729	0,460720807	733,534729	0,67513293
733,5695801	0,513189495	733,5687866	0,996493995	733,5596313	0,56946522	733,5596313	0,370887429	733,5687866	1,21448338	733,5695801	0,622604728	733,5695801	0,684118032	733,5695801	0,903275311	733,5687866	0,768131018	733,5596313	0,698406994	733,5596313	0,36772725	733,5596313	0,548049271
733,5944824	0,398579001	733,593689	0,715466022	733,5845337	0,367065459	733,5845337	0,210327253	733,593689	0,980595827	733,5944824	0,525683641	733,5944824	0,578297138	733,5944824	0,759979367	733,593689	0,536515713	733,5845337	0,485236704	733,5845337	0,218750283	733,5845337	0,354160577
733,6193848	0,328943074	733,6185913	0,542945266	733,609436	0,258278668	733,609436	0,160194874	733,6185913	0,787802398	733,6193848	0,490132004	733,6193848	0,526444733	733,6193848	0,678856075	733,6185913	0,413483679	733,609436	0,348264098	733,609436	0,146721274	733,609436	0,249334812
733,6442871	0,264779478	733,6434937	0,340577781	733,6343384	0,207357094	733,6343384	0,164953575	733,6434937	0,533730567	733,6442871	0,432826638	733,6442871	0,456630856	733,6442871	0,566710413	733,6434937	0,2442206	733,6343384	0,266244411	733,6343384	0,15903683	733,6343384	0,215413615
733,6691895	0,154394925	733,668396	0,23892048	733,6592407	0,125026599	733,6592407	0,096857794	733,668396	0,396960467	733,6691895	0,28800106	733,6691895	0,281600296	733,6691895	0,388428479	733,668396	0,173574433	733,6592407	0,162612244	733,6592407	0,097160108	733,6592407	0,124706313
733,6940918	0,111233562	733,6932983	0,225715294	733,6841431	0,106857978	733,6841431	0,080465898	733,6932983	0,342255801	733,6940918	0,20250991	733,6940918	0,174686387	733,6940918	0,261400014	733,6932983	0,183054104	733,6841431	0,123474911	733,6841431	0,072164975	733,6841431	0,094129726
733,7189941	0,141968817	733,7182007	0,19865948	733,7090454	0,118981354	733,7090454	0,106778607	733,7182007	0,269401819	733,7189941	0,176978767	733,7189941	0,175716162	733,7189941	0,222081751	733,7182007	0,172407374	733,7090454	0,126453653	733,7090454	0,090676092	733,7090454	0,10899204
733,7438965	0,100256421	733,743103	0,119853832	733,7340088	0,104853913	733,7340088	0,102453567	733,743103	0,170267254	733,7438965	0,111188874	733,7438965	0,129709199	733,7438965	0,148006275	733,743103	0,096738786	733,7340088	0,114424601	733,7340088	0,101301715	733,7340088	0,110633388
733,7687988	0,07772471	733,7680054	0,131522298	733,7589111	0,065587766	733,7589111	0,052567355	733,7680054	0,168451592	733,7687988	0,091675811	733,7687988	0,088217638	733,7687988	0,107667692	733,7680054	0,118764788	733,7589111	0,074074171	733,7589111	0,051746018	733,7589111	0,058944382
733,7937012	0,1098148	733,7929077	0,145072058	733,7838135	0,082479164	733,7838135	0,07689888	733,7929077	0,161867648	733,7937012	0,114960261	733,7937012	0,121264815	733,7937012	0,125997603	733,7929077	0,139432281	733,7838135	0,083537057	733,7838135	0,064780451	733,7838135	0,075479358
733,8186035	0,091683038	733,8178101	0,089290753	733,8087158	0,080967538	733,8087158	0,089627482	733,8178101	0,101390295	733,8186035	0,084304608	733,8186035	0,100082926	733,8186035	0,09957692	733,8178101	0,081488363	733,8087158	0,084808379	733,8087158	0,090040006	733,8087158	0,088037215
733,8435059	0,058754392	733,8427124	0,10033454	733,8336182	0,047910351	733,8336182	0,045359667	733,8427124	0,111537345	733,8435059	0,063507639	733,8435059	0,060742822	733,8435059	0,073647335	733,8427124	0,096960209	733,8336182	0,050401621	733,8336182	0,049586464	733,8336182	0,046498802
733,8684082	0,098538987	733,8676147	0,133961409	733,8585205	0,067489408	733,8585205	0,065754004	733,8676147	0,133974373	733,8684082	0,088056959	733,8684082	0,092592962	733,8684082	0,101413064	733,8676147	0,127191991	733,8585205	0,064571448	733,8585205	0,058657262	733,8585205	0,062939256
733,8933105	0,118557587	733,8925171	0,081518598	733,8834229	0,081376977	733,8834229	0,09255784	733,8925171	0,083122373	733,8933105	0,091580495	733,8933105	0,112846643	733,8933105	0,110177174	733,8925171	0,07633201	733,8834229	0,080487847	733,8834229	0,095681414	733,8834229	0,085976288
733,9182739	0,069088191	733,9174194	0,084473327	733,9083252	0,04902551	733,9083252	0,053405486	733,9174194	0,091289759	733,9182739	0,054747805	733,9182739	0,063696474	733,9182739	0,067784816	733,9174194	0,083466642	733,9083252	0,047539774	733,9083252	0,057295926	733,9083252	0,047646817
733,9431763	0,074925452	733,9423218	0,132367626	733,9332275	0,063947529	733,9332275	0,07676708	733,9423218	0,118337363	733,9431763	0,069344141	733,9431763	0,064469129	733,9431763	0,073932551	733,9423218	0,138135374	733,9332275	0,058575016	733,9332275	0,067236789	733,9332275	0,057769585
733,9680786	0,128153652	733,9672241	0,110309638	733,9581299	0,090637296	733,9581299	0,138405144	733,9672241	0,094873905	733,9680786	0,092418231	733,9680786	0,103143401	733,9680786	0,098256566	733,9672241	0,1221283	733,9581299	0,085804604	733,9581299	0,122148506	733,9581299	0,099951446
733,992981	0,123985298	733,9921875	0,084499955	733,9830322	0,077251233	733,9830322	0,129758328	733,9921875	0,071308203	733,992981	0,057681926	733,992981	0,079593949	733,992981	0,071437769	733,9921875	0,10447415	733,9830322	0,070467263	733,9830322	0,116473883	733,9830322	0,082975395
734,0178833	0,18229644	734,0170898	0,132353112	734,0079346	0,075998396	734,0079346	0,142951578	734,0170898	0,106448442	734,0178833	0,069642879	734,0178833	0,09060555	734,0178833	0,079458185	734,0170898	0,178682283	734,0079346	0,059880883	734,0079346	0,107091591	734,0079346	0,070895046
734,0427856	0,314300358	734,0419922	0,177115187	734,0328369	0,129305691	734,0328369	0,229734525	734,0419922	0,124345362	734,0427856	0,121803679	734,0427856	0,17061685	734,0427856	0,128251687	734,0419922	0,24035196	734,0328369	0,098222978	734,0328369	0,182526901	734,0328369	0,121196263
734,067688	0,344486058	734,0668945	0,145307869	734,0577393	0,155738547	734,0577393	0,275976151	734,0668945	0,099674962	734,067688	0,117920473	734,067688	0,206242889	734,067688	0,126990959	734,0668945	0,207532197	734,0577393	0,123611659	734,0577393	0,240615249	734,0577393	0,164269581
734,0925903	0,342049658	734,0917969	0,185935438	734,0826416	0,15001528	734,0826416	0,230921492	734,0917969	0,142614126	734,0925903	0,145357803	734,0925903	0,246550828	734,0925903	0,147351772	734,0917969	0,239012033	734,0826416	0,119223483	734,0826416	0,20387274	734,0826416	0,15064384
734,1174927	0,362667739	734,1166992	0,211682543	734,1075439	0,191620097	734,1075439	0,250485688	734,1166992	0,165874332	734,1174927	0,221309915	734,1174927	0,324639231	734,1174927	0,218044922	734,1166992	0,243291408	734,1075439	0,160412997	734,1075439	0,208007067	734,1075439	0,191417396
734,142395	0,293960929	734,1416016	0,137511402	734,1324463	0,196760356	734,1324463	0,24306795	734,1416016	0,11566928	734,142395	0,212949544	734,142395	0,304073513	734,142395	0,205553815	734,1416016	0,159300506	734,1324463	0,176726222	734,1324463	0,213552043	734,1324463	0,207018763
734,1672974	0,213415325	734,1665039	0,1378351	734,1573486	0,148910701	734,1573486	0,161168352	734,1665039	0,132307962	734,1672974	0,185668603	734,1672974	0,231399268	734,1672974	0,168167278	734,1665039	0,160535127	734,1573486	0,136734128	734,1573486	0,137043104	734,1573486	0,145932436
734,1921997	0,226563737	734,1914063	0,165470883	734,182251	0,153716236	734,182251	0,160861075	734,1914063	0,149658158	734,1921997	0,200416327	734,1921997	0,236025184	734,1921997	0,185436711	734,1914063	0,186556011	734,182251	0,146405935	734,182251	0,129620984	734,182251	0,147053957
734,2171021	0,223548621	734,2163086	0,105058938	734,2071533	0,151397988	734,2071533	0,170379177	734,2163086	0,095584333	734,2171021	0,184384614	734,2171021	0,232513338	734,2171021	0,180560559	734,2163086	0,120993868	734,2071533	0,150875926	734,2071533	0,153741658	734,2071533	0,160020813
734,2420044	0,154365063	734,2412109	0,101560041	734,2320557	0,0971338	734,2320557	0,10692057	734,2412109	0,099581786	734,2420044	0,126646817	734,2420044	0,164170638	734,2420044	0,121222161	734,2412109	0,124382503	734,2320557	0,09911038	734,2320557	0,101452723	734,2320557	0,099909984
734,2669067	0,147314787	734,2661133	0,151245266	734,256958	0,106341891	734,256958	0,120971143	734,2661133	0,132045582	734,2669067	0,128959045	734,2669067	0,15134871	734,2669067	0,124981247	734,2661133	0,18308942	734,256958	0,099464417	734,256958	0,099870585	734,256958	0,100561202
734,2918091	0,190191209	734,2910156	0,131293908	734,2818604	0,130896375	734,2818604	0,165912896	734,2910156	0,102384739	734,2918091	0,149438605	734,2918091	0,17668432	734,2918091	0,147445261	734,2910156	0,164896935	734,2818604	0,122840196	734,2818604	0,146692559	734,2818604	0,132709965
734,3167114	0,139744118	734,315918	0,111496024	734,3067627	0,120380521	734,3067627	0,162076503	734,315918	0,085233979	734,3167114	0,097793572	734,3167114	0,127139613	734,3167114	0,106152184	734,315918	0,159382343	734,3067627	0,110492378	734,3067627	0,14546077	734,3067627	0,123748332
734,3416138	0,14658162	734,3408203	0,194243893	734,3317261	0,102797359	734,3317261	0,144547001	734,3408203	0,131501436	734,3416138	0,102762893	734,3416138	0,118167266	734,3416138	0,109963179	734,3408203	0,289350867	734,3317261	0,08927685	734,3317261	0,12496531	734,3317261	0,090950124
734,3665161	0,253798604	734,3657227	0,330427825	734,3566284	0,162976548	734,3566284	0,254472882	734,3657227	0,181996971	734,3665161	0,136882618	734,3665161	0,178506628	734,3665161	0,159613281	734,3657227	0,47584632	734,3566284	0,127443403	734,3566284	0,214720383	734,3566284	0,146568999
734,3914185	0,305077344	734,390625	0,463326842	734,3815308	0,223599762	734,3815308	0,379936993	734,390625	0,225398362	734,3914185	0,119883679	734,3914185	0,194401637	734,3914185	0,166649774	734,390625	0,651388228	734,3815308	0,163796186	734,3815308	0,335432917	734,3815308	0,211032555
734,4163208	0,377440214	734,4155273	0,752409279	734,4064331	0,294971526	734,4064331	0,46064496	734,4155273	0,399391681	734,4163208	0,158951953	734,4163208	0,249772832	734,4163208	0,227408677	734,4155273	0,960730314	734,4064331	0,196482211	734,4064331	0,405760914	734,4064331	0,249056533
[truncated: 99,014 more rows]
