# Supplementary material for: Spatial proteomic alterations detected via MALDI-MS imaging implicate neuronal loss in a Huntington's disease mouse (YAC128) brain
Source: Royal Society of Chemistry journal article supplement (doi:10.1039/d1mo00440a), 2022-02-07
Supplement: d1mo00440a7.xlsx [file d1mo00440a7.xlsx]

## Sheet: Region-4
Supplemental Material4_MALDI-MSI region information_Region4
LM-1		LM-2		LM-3		LM-4		LM-5		LM-6		YAC128-1		YAC128-2		YAC128-3		YAC128-4		YAC128-5		YAC128-6
m/z	intensities	m/z	intensities	m/z	intensities	m/z	intensities	m/z	intensities	m/z	intensities	m/z	intensities	m/z	intensities	m/z	intensities	m/z	intensities	m/z	intensities	m/z	intensities
699,9237061	0	699,9227295	0	699,913147	0	699,913147	0	699,9227295	0	699,9237061	0	699,9237061	0	699,9237061	0	699,9227295	0	699,913147	0	699,913147	0	699,913147	0
699,9486084	0,058903378	699,9476318	0,017490117	699,9380493	0,008939228	699,9380493	0,017960329	699,9476318	0,012269254	699,9486084	0,029192613	699,9486084	0,035491955	699,9486084	0,02817589	699,9476318	0,031172972	699,9380493	0,007257436	699,9380493	0,011475767	699,9380493	0,010133905
699,9735107	0,059087522	699,9725342	0,017542673	699,9629517	0,008968119	699,9629517	0,018023551	699,9725342	0,012304974	699,9735107	0,029272236	699,9735107	0,03559887	699,9735107	0,028246259	699,9725342	0,031282205	699,9629517	0,007276895	699,9629517	0,011512691	699,9629517	0,010162492
699,9984741	0,167791203	699,9974365	0,094465591	699,987854	0,082978472	699,987854	0,124409243	699,9974365	0,081337735	699,9984741	0,064393215	699,9984741	0,094989955	699,9984741	0,078729361	699,9974365	0,149663582	699,987854	0,086477496	699,987854	0,116884559	699,987854	0,095785975
700,0233765	0,370575815	700,0223389	0,168232769	700,0127563	0,077138968	700,0127563	0,15313375	700,0223389	0,11948847	700,0233765	0,078496009	700,0233765	0,115314111	700,0233765	0,089416988	700,0223389	0,358741879	700,0127563	0,071100138	700,0127563	0,112746619	700,0127563	0,074381553
700,0482788	1,01349318	700,0472412	0,278710276	700,0376587	0,133633077	700,0376587	0,362282544	700,0472412	0,151922569	700,0482788	0,140133724	700,0482788	0,268261135	700,0482788	0,151460424	700,0472412	0,7333498	700,0376587	0,106981128	700,0376587	0,229804635	700,0376587	0,13335754
700,0731812	2,090749979	700,0721436	0,394104868	700,062561	0,216597274	700,062561	0,662896812	700,0721436	0,176219583	700,0731812	0,186326876	700,0731812	0,509367287	700,0731812	0,210224941	700,0721436	1,102712035	700,062561	0,143755719	700,062561	0,402922362	700,062561	0,224629864
700,0980835	3,045037746	700,0971069	0,57812041	700,0874634	0,342788249	700,0874634	0,813186228	700,0971069	0,299276978	700,0980835	0,39193356	700,0980835	0,998553216	700,0980835	0,406168938	700,0971069	1,321964622	700,0874634	0,188242108	700,0874634	0,452445745	700,0874634	0,314659446
700,1229858	3,036867619	700,1220093	0,653228521	700,1123657	0,502009332	700,1123657	0,749180496	700,1220093	0,420960993	700,1229858	0,804451942	700,1229858	1,714835048	700,1229858	0,774480045	700,1220093	1,188575864	700,1123657	0,327050954	700,1123657	0,425997168	700,1123657	0,459765077
700,1478882	2,200335503	700,1469116	0,521553874	700,1372681	0,50867939	700,1372681	0,562580466	700,1469116	0,41749841	700,1478882	1,235336065	700,1478882	2,062634706	700,1478882	1,073154807	700,1469116	0,811185002	700,1372681	0,431973875	700,1372681	0,347479343	700,1372681	0,485374928
700,1727905	1,328294754	700,171814	0,412462085	700,1622314	0,368475854	700,1622314	0,324177325	700,171814	0,402197152	700,1727905	1,43648088	700,1727905	1,805293083	700,1727905	1,107484221	700,171814	0,552914381	700,1622314	0,390561402	700,1622314	0,207425624	700,1622314	0,345213145
700,1976929	0,831790268	700,1967163	0,344517857	700,1871338	0,276668012	700,1871338	0,228366822	700,1967163	0,35179916	700,1976929	1,340111732	700,1976929	1,36653924	700,1976929	0,968109071	700,1967163	0,408484608	700,1871338	0,32930705	700,1871338	0,149774566	700,1871338	0,263186127
700,2225952	0,522524059	700,2216187	0,214620084	700,2120361	0,210030019	700,2120361	0,20026508	700,2216187	0,239915714	700,2225952	0,999917388	700,2225952	0,93395257	700,2225952	0,712685704	700,2216187	0,242949516	700,2120361	0,264657855	700,2120361	0,156975701	700,2120361	0,219346985
700,2474976	0,32177639	700,246521	0,169206634	700,2369385	0,129347056	700,2369385	0,127874687	700,246521	0,194407091	700,2474976	0,670047879	700,2474976	0,58605355	700,2474976	0,466642559	700,246521	0,194592193	700,2369385	0,170297384	700,2369385	0,103674442	700,2369385	0,131334811
700,2723999	0,275443375	700,2714233	0,196098372	700,2618408	0,123367801	700,2618408	0,13313964	700,2714233	0,189047366	700,2723999	0,481422186	700,2723999	0,428503573	700,2723999	0,354382336	700,2714233	0,231503412	700,2618408	0,138806835	700,2618408	0,105470285	700,2618408	0,12050049
700,2973022	0,25312537	700,2963257	0,166039065	700,2867432	0,144853443	700,2867432	0,200520292	700,2963257	0,13881132	700,2973022	0,339861602	700,2973022	0,331980079	700,2973022	0,266513079	700,2963257	0,21353662	700,2867432	0,149655789	700,2867432	0,173972592	700,2867432	0,155695289
700,3222046	0,205067933	700,321228	0,189573839	700,3116455	0,133171976	700,3116455	0,204738632	700,321228	0,135305882	700,3222046	0,224880338	700,3222046	0,221019477	700,3222046	0,185833544	700,321228	0,268520653	700,3116455	0,120684795	700,3116455	0,176970035	700,3116455	0,136748329
700,3471069	0,264216036	700,3461304	0,327514619	700,3365479	0,169490993	700,3365479	0,254519522	700,3461304	0,207115039	700,3471069	0,22199218	700,3471069	0,238933459	700,3471069	0,199514076	700,3461304	0,436866403	700,3365479	0,138802841	700,3365479	0,20872654	700,3365479	0,160695612
700,3720093	0,317712903	700,3710327	0,431490153	700,3614502	0,255146593	700,3614502	0,364872515	700,3710327	0,251549482	700,3720093	0,203700125	700,3720093	0,271750629	700,3720093	0,21812433	700,3710327	0,565437555	700,3614502	0,207588017	700,3614502	0,324135005	700,3614502	0,258311927
700,3969116	0,320174903	700,3959351	0,609227061	700,3863525	0,29815194	700,3863525	0,41765663	700,3959351	0,345727384	700,3969116	0,17955257	700,3969116	0,253459573	700,3969116	0,221706763	700,3959351	0,76614058	700,3863525	0,240537181	700,3863525	0,3797746	700,3863525	0,297473758
700,421814	0,41665405	700,4208374	0,989397049	700,4112549	0,377915621	700,4112549	0,518085182	700,4208374	0,561418951	700,421814	0,240392148	700,421814	0,331949711	700,421814	0,318481803	700,4208374	1,174961686	700,4112549	0,293244392	700,4112549	0,463550776	700,4112549	0,353429466
700,4467163	0,539131761	700,4457397	1,455798864	700,4361572	0,531855702	700,4361572	0,76591152	700,4457397	0,806290686	700,4467163	0,295719087	700,4467163	0,444042891	700,4467163	0,439916641	700,4457397	1,588993907	700,4361572	0,416503876	700,4361572	0,671254933	700,4361572	0,513627231
700,4716187	0,583796024	700,4706421	1,944884896	700,4610596	0,69767797	700,4610596	0,956278622	700,4706421	1,156726241	700,4716187	0,327712238	700,4716187	0,492194921	700,4716187	0,543628991	700,4706421	1,876479983	700,4610596	0,541943789	700,4610596	0,822905421	700,4610596	0,67329216
700,496521	0,643168271	700,4955444	2,305171251	700,4859619	0,891764581	700,4859619	0,999160647	700,4955444	1,626445293	700,496521	0,458977401	700,496521	0,623659611	700,496521	0,735884845	700,4955444	1,912057519	700,4859619	0,722160816	700,4859619	0,797509253	700,4859619	0,832514524
700,5214233	0,630420566	700,5204468	2,203703165	700,5108643	1,036708593	700,5108643	0,897628844	700,5204468	1,904731274	700,5214233	0,597335339	700,5214233	0,756665051	700,5214233	0,947980702	700,5204468	1,58166635	700,5108643	0,962276578	700,5108643	0,706894398	700,5108643	0,970382333
700,5463257	0,437902808	700,5453491	1,751361012	700,5357666	0,933134615	700,5357666	0,644143641	700,5453491	1,878056645	700,5463257	0,663007677	700,5463257	0,690080345	700,5463257	0,990763247	700,5453491	1,105887771	700,5357666	1,034632206	700,5357666	0,516055524	700,5357666	0,885241866
700,571228	0,316053122	700,5702515	1,318853974	700,5606689	0,702307642	700,5606689	0,3858383	700,5702515	1,654106498	700,571228	0,686909199	700,571228	0,610506773	700,571228	0,938218832	700,5702515	0,782911956	700,5606689	0,894549906	700,5606689	0,308408469	700,5606689	0,646073639
700,5961304	0,267507672	700,5951538	0,923526645	700,5855713	0,51248455	700,5855713	0,285923481	700,5951538	1,287335753	700,5961304	0,635795712	700,5961304	0,518350065	700,5961304	0,803385019	700,5951538	0,524431229	700,5855713	0,711798131	700,5855713	0,224432409	700,5855713	0,480792552
700,6210327	0,186096802	700,6200562	0,64240104	700,6104736	0,382140398	700,6104736	0,235059723	700,6200562	0,980445087	700,6210327	0,502925634	700,6210327	0,401670486	700,6210327	0,624178112	700,6200562	0,336470485	700,6104736	0,560834289	700,6104736	0,201512396	700,6104736	0,380358875
700,6459351	0,133526847	700,6449585	0,47303769	700,635376	0,251078516	700,635376	0,147594973	700,6449585	0,759033561	700,6459351	0,393440545	700,6459351	0,280389816	700,6459351	0,475620836	700,6449585	0,254330099	700,635376	0,395264328	700,635376	0,129225194	700,635376	0,249311909
700,6708374	0,138063312	700,6698608	0,372883588	700,6602783	0,17652078	700,6602783	0,110329822	700,6698608	0,566614091	700,6708374	0,319385558	700,6708374	0,233849347	700,6708374	0,367454141	700,6698608	0,234626696	700,6602783	0,261853218	700,6602783	0,090350404	700,6602783	0,158715039
700,6957397	0,140912384	700,6947632	0,252935976	700,6851807	0,155883148	700,6851807	0,141772673	700,6947632	0,380953074	700,6957397	0,24025172	700,6957397	0,198479399	700,6957397	0,270353377	700,6947632	0,15649052	700,6851807	0,218599722	700,6851807	0,11805182	700,6851807	0,160791248
700,7206421	0,087453134	700,7196655	0,163296759	700,710083	0,105903625	700,710083	0,093573473	700,7196655	0,259719372	700,7206421	0,146948159	700,7206421	0,124537639	700,7206421	0,175249785	700,7196655	0,104191743	700,710083	0,149796933	700,710083	0,08907222	700,710083	0,114707187
700,7456055	0,105500512	700,7445679	0,182796612	700,7349854	0,086980835	700,7349854	0,068892002	700,7445679	0,234130532	700,7456055	0,142685056	700,7456055	0,128045037	700,7456055	0,153242663	700,7445679	0,135567233	700,7349854	0,108225852	700,7349854	0,057682279	700,7349854	0,078502655
700,7705078	0,124706931	700,7694702	0,13979651	700,7599487	0,102492481	700,7599487	0,098507114	700,7694702	0,172619328	700,7705078	0,130723044	700,7705078	0,138077617	700,7705078	0,137471989	700,7694702	0,106898457	700,7599487	0,120750315	700,7599487	0,090547733	700,7599487	0,103767321
700,7954102	0,06719391	700,7944336	0,086564511	700,7848511	0,074738584	700,7848511	0,073566087	700,7944336	0,114397205	700,7954102	0,080433957	700,7954102	0,078702509	700,7954102	0,0852613	700,7944336	0,063917868	700,7848511	0,09462744	700,7848511	0,079944327	700,7848511	0,085367993
700,8203125	0,063064389	700,8193359	0,117146879	700,8097534	0,055844057	700,8097534	0,044524066	700,8193359	0,132471949	700,8203125	0,090973333	700,8203125	0,0881823	700,8203125	0,091202885	700,8193359	0,089741126	700,8097534	0,065292649	700,8097534	0,045295134	700,8097534	0,050778247
700,8452148	0,085135162	700,8442383	0,108156964	700,8346558	0,072099425	700,8346558	0,076967269	700,8442383	0,109730892	700,8452148	0,098268889	700,8452148	0,107463993	700,8452148	0,096013695	700,8442383	0,086528726	700,8346558	0,081567712	700,8346558	0,074914828	700,8346558	0,076550856
700,8701172	0,061187141	700,8691406	0,067573965	700,8595581	0,066203989	700,8595581	0,072027236	700,8691406	0,07511542	700,8701172	0,051622994	700,8701172	0,050230853	700,8701172	0,058944818	700,8691406	0,054057445	700,8595581	0,07354337	700,8595581	0,082157448	700,8595581	0,075172052
700,8950195	0,065193929	700,894043	0,097618163	700,8844604	0,046991527	700,8844604	0,044764198	700,894043	0,096268572	700,8950195	0,060298201	700,8950195	0,059612039	700,8950195	0,066026248	700,894043	0,090577073	700,8844604	0,051000327	700,8844604	0,048771065	700,8844604	0,048057918
700,9199219	0,101419345	700,9189453	0,105456442	700,9093628	0,06903588	700,9093628	0,074757241	700,9189453	0,094190016	700,9199219	0,080428734	700,9199219	0,094554551	700,9199219	0,089349985	700,9189453	0,099626638	700,9093628	0,072823927	700,9093628	0,070978113	700,9093628	0,070631906
700,9448242	0,079914846	700,9438477	0,064034611	700,9342651	0,06289006	700,9342651	0,081773527	700,9438477	0,066130653	700,9448242	0,047322754	700,9448242	0,073007561	700,9448242	0,06236941	700,9438477	0,06244709	700,9342651	0,07195726	700,9342651	0,088585392	700,9342651	0,076957382
700,9697266	0,093128242	700,96875	0,098549657	700,9591675	0,04574804	700,9591675	0,065883741	700,96875	0,088221058	700,9697266	0,054781422	700,9697266	0,064891815	700,9697266	0,060016315	700,96875	0,11688064	700,9591675	0,049494628	700,9591675	0,058077186	700,9591675	0,048746184
700,9946289	0,205869541	700,9936523	0,129607126	700,9840698	0,0753038	700,9840698	0,125823781	700,9936523	0,095458679	700,9946289	0,08224152	700,9946289	0,120786637	700,9946289	0,091664426	700,9936523	0,197509319	700,9840698	0,069685802	700,9840698	0,094382361	700,9840698	0,076212279
701,0195313	0,369726628	701,0185547	0,116001256	701,0089722	0,091522574	701,0089722	0,210557818	701,0185547	0,070015341	701,0195313	0,070006661	701,0195313	0,131466597	701,0195313	0,082163565	701,0185547	0,275583595	701,0089722	0,082763426	701,0089722	0,152827308	701,0089722	0,102383509
701,0444336	0,772953153	701,043457	0,203175843	701,0338745	0,103683464	701,0338745	0,30150333	701,043457	0,112859696	701,0444336	0,092494577	701,0444336	0,195337057	701,0444336	0,101712897	701,043457	0,530674696	701,0338745	0,07282906	701,0338745	0,187233806	701,0338745	0,098002441
701,0693359	1,490767717	701,0683594	0,334842116	701,0587769	0,19775793	701,0587769	0,524846435	701,0683594	0,167167708	701,0693359	0,211014748	701,0693359	0,456745416	701,0693359	0,2170562	701,0683594	0,79829067	701,0587769	0,126333356	701,0587769	0,302405924	701,0587769	0,186453775
701,0942383	1,986100316	701,0932617	0,364502996	701,0836792	0,307654768	701,0836792	0,640391827	701,0932617	0,189120635	701,0942383	0,348103404	701,0942383	0,797450721	701,0942383	0,34497267	701,0932617	0,807940543	701,0836792	0,200160503	701,0836792	0,381820768	701,0836792	0,302206635
701,1191406	1,836212516	701,1181641	0,389967561	701,1085815	0,348197401	701,1085815	0,516638815	701,1181641	0,261724859	701,1191406	0,584473073	701,1191406	1,14581883	701,1191406	0,527742028	701,1181641	0,707483768	701,1085815	0,249581799	701,1085815	0,298157007	701,1085815	0,319051445
701,144043	1,414062023	701,1430664	0,378734261	701,1334839	0,359674215	701,1334839	0,405307233	701,1430664	0,312087446	701,144043	0,882485926	701,144043	1,348389506	701,144043	0,731635451	701,1430664	0,568205237	701,1334839	0,319933146	701,1334839	0,239574507	701,1334839	0,329564959
701,1689453	0,976754546	701,1679688	0,253180921	701,1583862	0,309718013	701,1583862	0,316682726	701,1679688	0,243023351	701,1689453	0,956013322	701,1689453	1,212962151	701,1689453	0,752398372	701,1679688	0,354564101	701,1583862	0,336017281	701,1583862	0,216496497	701,1583862	0,302209318
701,1938477	0,610140145	701,1928711	0,192101613	701,1832886	0,200606003	701,1832886	0,190268189	701,1928711	0,206473976	701,1938477	0,853810906	701,1938477	0,914270997	701,1938477	0,619571924	701,1928711	0,251897693	701,1832886	0,252844781	701,1832886	0,133709475	701,1832886	0,196336269
701,21875	0,440442115	701,2177734	0,199074805	701,2081909	0,161914036	701,2081909	0,154374868	701,2177734	0,196072876	701,21875	0,715582371	701,21875	0,691827774	701,21875	0,519068122	701,2177734	0,241424739	701,2081909	0,208373025	701,2081909	0,111983366	701,2081909	0,156063914
701,2436523	0,327456027	701,2426758	0,132064864	701,2330933	0,149627507	701,2330933	0,179372877	701,2426758	0,131542638	701,2436523	0,526619554	701,2436523	0,504079044	701,2436523	0,391290396	701,2426758	0,166138515	701,2330933	0,189797342	701,2330933	0,143342406	701,2330933	0,164015397
701,2685547	0,225028291	701,2675781	0,111738473	701,2579956	0,105050467	701,2579956	0,139926299	701,2675781	0,106995948	701,2685547	0,35823378	701,2685547	0,322343379	701,2685547	0,253625423	701,2675781	0,156136259	701,2579956	0,127502516	701,2579956	0,117241688	701,2579956	0,11548955
701,293457	0,222391605	701,2924805	0,168687493	701,2828979	0,108048558	701,2828979	0,149408638	701,2924805	0,137700722	701,293457	0,294157207	701,293457	0,271741301	701,293457	0,224173024	701,2924805	0,230779991	701,2828979	0,109742552	701,2828979	0,112486437	701,2828979	0,107749656
701,3183594	0,261001408	701,3173828	0,197987586	701,3078003	0,14736174	701,3078003	0,212056354	701,3173828	0,136954725	701,3183594	0,270979375	701,3183594	0,274411052	701,3183594	0,217742026	701,3173828	0,26668781	701,3078003	0,143114343	701,3078003	0,17394875	701,3078003	0,155207932
701,3432617	0,242405772	701,3422852	0,214772671	701,3327026	0,156494379	701,3327026	0,238009289	701,3422852	0,123177022	701,3432617	0,193776935	701,3432617	0,226421282	701,3432617	0,175418943	701,3422852	0,302421689	701,3327026	0,143501282	701,3327026	0,204176486	701,3327026	0,169184536
701,3681641	0,244452089	701,3671875	0,357744515	701,357666	0,164979815	701,357666	0,25257659	701,3671875	0,199879006	701,3681641	0,168773189	701,3681641	0,20570685	701,3681641	0,166661739	701,3671875	0,502112448	701,357666	0,135258377	701,357666	0,226037771	701,357666	0,162105948
701,3930664	0,354361057	701,3920898	0,602329552	701,3825684	0,247443333	701,3825684	0,384469599	701,3920898	0,314352065	701,3930664	0,20842199	701,3930664	0,280075818	701,3930664	0,241211265	701,3920898	0,886650622	701,3825684	0,196160838	701,3825684	0,347520947	701,3825684	0,238264471
701,4179688	0,560978353	701,4169922	0,979494452	701,4074707	0,36053282	701,4074707	0,678099692	701,4169922	0,438645929	701,4179688	0,213007614	701,4179688	0,340482146	701,4179688	0,287039667	701,4169922	1,595383644	701,4074707	0,271397352	701,4074707	0,64772594	701,4074707	0,355597645
701,4428711	1,10885334	701,4418945	1,796647906	701,432373	0,589740217	701,432373	1,189031482	701,4418945	0,786547661	701,4428711	0,261041343	701,4428711	0,497898519	701,4428711	0,403394192	701,4418945	2,853294611	701,432373	0,354677409	701,432373	1,161632419	701,432373	0,51386708
701,4677734	2,084852457	701,4667969	2,892983198	701,4572754	1,159543753	701,4572754	1,937501669	701,4667969	1,398310304	701,4677734	0,450648069	701,4677734	1,0445503	701,4677734	0,762392938	701,4667969	4,077578068	701,4572754	0,649261594	701,4572754	1,849803329	701,4572754	0,942909062
701,4927368	2,730489254	701,4917603	3,615858078	701,4821777	1,918892026	701,4821777	2,255438089	701,4917603	2,148863554	701,4927368	0,782655954	701,4927368	1,932606697	701,4927368	1,404709697	701,4917603	4,281195164	701,4821777	1,215027809	701,4821777	2,124195814	701,4821777	1,527172565
701,5176392	2,46894455	701,5166626	3,632588387	701,5070801	2,312430143	701,5070801	1,810582399	701,5166626	2,82785511	701,5176392	1,322367191	701,5176392	2,849565983	701,5176392	2,282160521	701,5166626	3,555702209	701,5070801	1,858984232	701,5070801	1,690376163	701,5070801	1,806839585
701,5425415	1,786688805	701,5415649	3,053936958	701,5319824	2,10973382	701,5319824	1,210410714	701,5415649	3,028038025	701,5425415	1,932554245	701,5425415	3,260908127	701,5425415	3,020013571	701,5415649	2,556505442	701,5319824	2,221605301	701,5319824	1,115546107	701,5319824	1,658309102
701,5674438	1,143944979	701,5664673	2,166481495	701,5568848	1,554763436	701,5568848	0,777777374	701,5664673	2,602808952	701,5674438	2,133280039	701,5674438	2,828300476	701,5674438	3,009030104	701,5664673	1,622840643	701,5568848	2,01915431	701,5568848	0,723068595	701,5568848	1,269274354
701,5923462	0,673952103	701,5913696	1,441069603	701,5817871	0,976997256	701,5817871	0,438546836	701,5913696	1,998483658	701,5923462	1,833325148	701,5923462	1,978928208	701,5923462	2,403416634	701,5913696	1,005073309	701,5817871	1,453667283	701,5817871	0,411896378	701,5817871	0,799902678
701,6172485	0,431759089	701,616272	0,994825542	701,6066895	0,600703537	701,6066895	0,268517762	701,616272	1,470918417	701,6172485	1,406184554	701,6172485	1,344522953	701,6172485	1,745560408	701,616272	0,687102139	701,6066895	0,960755706	701,6066895	0,245088086	701,6066895	0,484887123
701,6421509	0,309410393	701,6411743	0,638863266	701,6315918	0,40467611	701,6315918	0,227575287	701,6411743	0,993155837	701,6421509	0,969631374	701,6421509	0,902300119	701,6421509	1,185785055	701,6411743	0,433016509	701,6315918	0,641104579	701,6315918	0,213212207	701,6315918	0,34760341
701,6670532	0,181230366	701,6660767	0,405653894	701,6564941	0,255882949	701,6564941	0,150312915	701,6660767	0,665301979	701,6670532	0,613623023	701,6670532	0,545695364	701,6670532	0,766896546	701,6660767	0,271417528	701,6564941	0,396506637	701,6564941	0,145109445	701,6564941	0,223799273
701,6919556	0,162788957	701,690979	0,334432065	701,6813965	0,178223148	701,6813965	0,105299763	701,690979	0,496966898	701,6919556	0,444864869	701,6919556	0,399639219	701,6919556	0,539740026	701,690979	0,252682269	701,6813965	0,255159855	701,6813965	0,091494299	701,6813965	0,140286267
701,7168579	0,159964949	701,7158813	0,246435493	701,7062988	0,16423893	701,7062988	0,133600309	701,7158813	0,341600448	701,7168579	0,312549233	701,7168579	0,308336854	701,7168579	0,387395889	701,7158813	0,187220156	701,7062988	0,21556212	701,7062988	0,120587938	701,7062988	0,146510839
701,7417603	0,093285605	701,7407837	0,15623039	701,7312012	0,117542855	701,7312012	0,10027054	701,7407837	0,23078157	701,7417603	0,190942407	701,7417603	0,184545293	701,7417603	0,239020139	701,7407837	0,117669053	701,7312012	0,155723304	701,7312012	0,098172374	701,7312012	0,115558483
701,7666626	0,084431902	701,765686	0,161686808	701,7561035	0,085139431	701,7561035	0,059886374	701,765686	0,211435676	701,7666626	0,166411668	701,7666626	0,153325975	701,7666626	0,193074748	701,765686	0,142773822	701,7561035	0,105832435	701,7561035	0,053663936	701,7561035	0,068460263
701,7915649	0,101004474	701,7905884	0,144698277	701,7810059	0,093564935	701,7810059	0,082787573	701,7905884	0,167877123	701,7915649	0,149414182	701,7915649	0,162851393	701,7915649	0,174441084	701,7905884	0,124161787	701,7810059	0,112832189	701,7810059	0,077680305	701,7810059	0,089940071
701,8164673	0,05658298	701,8154907	0,089174353	701,8059082	0,072867729	701,8059082	0,074757464	701,8154907	0,108641185	701,8164673	0,08121299	701,8164673	0,088361286	701,8164673	0,107270107	701,8154907	0,071901582	701,8059082	0,093693651	701,8059082	0,080930576	701,8059082	0,078854285
701,8413696	0,054338556	701,8403931	0,118645445	701,8308105	0,054786127	701,8308105	0,046436798	701,8403931	0,122534648	701,8413696	0,081902832	701,8413696	0,074585795	701,8413696	0,098981939	701,8403931	0,109370306	701,8308105	0,059306029	701,8308105	0,046253297	701,8308105	0,043779928
701,866272	0,089482427	701,8652954	0,127877831	701,8557129	0,075751849	701,8557129	0,079601236	701,8652954	0,114436947	701,866272	0,093601003	701,866272	0,106046155	701,866272	0,108367302	701,8652954	0,121823899	701,8557129	0,075151779	701,8557129	0,073061533	701,8557129	0,069901757
701,8911743	0,066183694	701,8901978	0,083820701	701,8806152	0,070544302	701,8806152	0,082154043	701,8901978	0,080152348	701,8911743	0,05847735	701,8911743	0,067759514	701,8911743	0,071413964	701,8901978	0,081992306	701,8806152	0,075744458	701,8806152	0,092518747	701,8806152	0,079753734
701,9160767	0,059906699	701,9151001	0,114625722	701,9055176	0,048763342	701,9055176	0,05134932	701,9151001	0,099803165	701,9160767	0,052754954	701,9160767	0,063331783	701,9160767	0,069630258	701,9151001	0,118327245	701,9055176	0,053624999	701,9055176	0,052508205	701,9055176	0,047913853
701,940979	0,116148748	701,9400024	0,132486999	701,9304199	0,077376597	701,9304199	0,087820522	701,9400024	0,111802272	701,940979	0,081645153	701,940979	0,109787993	701,940979	0,104676433	701,9400024	0,155885413	701,9304199	0,070969485	701,9304199	0,07725662	701,9304199	0,071239725
701,9658813	0,136895671	701,9649048	0,11015182	701,9553833	0,084995762	701,9553833	0,117562659	701,9649048	0,088557832	701,9658813	0,079119079	701,9658813	0,116257936	701,9658813	0,093239911	701,9649048	0,136126235	701,9553833	0,083246082	701,9553833	0,111522079	701,9553833	0,09720543
701,9907837	0,149858132	701,9898071	0,105373934	701,9802856	0,071084641	701,9802856	0,116848409	701,9898071	0,07812158	701,9907837	0,053973239	701,9907837	0,087595955	701,9907837	0,071835048	701,9898071	0,167759761	701,9802856	0,06386859	701,9802856	0,105283312	701,9802856	0,077782758
702,015686	0,337104529	702,0147095	0,185837194	702,005188	0,078364901	702,005188	0,172545165	702,0147095	0,129389659	702,015686	0,094295628	702,015686	0,141822636	702,015686	0,107949913	702,0147095	0,342105746	702,005188	0,058731548	702,005188	0,119571269	702,005188	0,068681896
702,0405884	0,719094992	702,0396118	0,232631534	702,0300903	0,145569742	702,0300903	0,399557173	702,0396118	0,129601061	702,0405884	0,13041155	702,0405884	0,254801482	702,0405884	0,15177919	702,0396118	0,506893456	702,0300903	0,103783123	702,0300903	0,248095527	702,0300903	0,146612853
702,0654907	1,181315303	702,0645142	0,274108022	702,0549927	0,211552158	702,0549927	0,604436398	702,0645142	0,139792174	702,0654907	0,159790948	702,0654907	0,399243504	702,0654907	0,180494159	702,0645142	0,635337472	702,0549927	0,12609379	702,0549927	0,349142104	702,0549927	0,211459741
702,0903931	1,505231142	702,0894165	0,381674767	702,079895	0,318418562	702,079895	0,643207908	702,0894165	0,228832766	702,0903931	0,315218359	702,0903931	0,70357424	702,0903931	0,32567957	702,0894165	0,724521101	702,079895	0,183811128	702,079895	0,348880231	702,079895	0,285222173
702,1152954	1,398896813	702,1143188	0,381903797	702,1047974	0,420868427	702,1047974	0,585276365	702,1143188	0,262588471	702,1152954	0,537772	702,1152954	1,020083547	702,1152954	0,509581506	702,1143188	0,618963361	702,1047974	0,311641246	702,1047974	0,341698468	702,1047974	0,383914351
702,1401978	1,000706553	702,1392212	0,284680426	702,1296997	0,383262187	702,1296997	0,433074236	702,1392212	0,237906143	702,1401978	0,676222265	702,1401978	1,045398116	702,1401978	0,579885244	702,1392212	0,427994221	702,1296997	0,355963051	702,1296997	0,267921776	702,1296997	0,362981409
702,1651001	0,699058235	702,1641846	0,264221609	702,1546021	0,291104406	702,1546021	0,263113141	702,1641846	0,250159413	702,1651001	0,746219397	702,1651001	0,923949838	702,1651001	0,588379681	702,1641846	0,346428365	702,1546021	0,307252795	702,1546021	0,165808037	702,1546021	0,257883608
702,1900024	0,519917607	702,1890869	0,215658918	702,1795044	0,236840278	702,1795044	0,214292794	702,1890869	0,213085905	702,1900024	0,693401277	702,1900024	0,755474687	702,1900024	0,541583419	702,1890869	0,260261983	702,1795044	0,281314343	702,1795044	0,148414552	702,1795044	0,224501073
702,2149658	0,327911496	702,2139893	0,128447846	702,2044067	0,170033634	702,2044067	0,1637263	702,2139893	0,137102187	702,2149658	0,509230494	702,2149658	0,52071768	702,2149658	0,393610448	702,2139893	0,150555253	702,2044067	0,221756458	702,2044067	0,132659212	702,2044067	0,174254864
702,2398682	0,230755225	702,2388916	0,135206804	702,2293091	0,105791472	702,2293091	0,102045469	702,2388916	0,136765674	702,2398682	0,38444522	702,2398682	0,365570009	702,2398682	0,288325161	702,2388916	0,159430131	702,2293091	0,139083862	702,2293091	0,07942988	702,2293091	0,100744978
702,2647705	0,23796238	702,2637939	0,145433873	702,2542114	0,114184842	702,2542114	0,132879883	702,2637939	0,126972526	702,2647705	0,313612491	702,2647705	0,308782071	702,2647705	0,256949753	702,2637939	0,171122491	702,2542114	0,127616361	702,2542114	0,107294425	702,2542114	0,109765865
702,2896729	0,195060492	702,2886963	0,107196443	702,2791138	0,106446944	702,2791138	0,158229768	702,2886963	0,085751109	702,2896729	0,215821579	702,2896729	0,230628401	702,2896729	0,180877745	702,2886963	0,142818853	702,2791138	0,119128086	702,2791138	0,138412625	702,2791138	0,120683618
702,3145752	0,172651529	702,3135986	0,163159758	702,3040161	0,095315605	702,3040161	0,141098753	702,3135986	0,115049526	702,3145752	0,165330678	702,3145752	0,178762555	702,3145752	0,136511609	702,3135986	0,222547233	702,3040161	0,089166388	702,3040161	0,117527813	702,3040161	0,093685903
702,3394775	0,239754751	702,338501	0,265315533	702,3289185	0,144256815	702,3289185	0,213564217	702,338501	0,156332031	702,3394775	0,176264212	702,3394775	0,212584451	702,3394775	0,173465073	702,338501	0,368868858	702,3289185	0,120108254	702,3289185	0,171138063	702,3289185	0,136999771
702,3643799	0,267495871	702,3634033	0,375911772	702,3538208	0,190960988	702,3538208	0,308495909	702,3634033	0,182506636	702,3643799	0,15199253	702,3643799	0,208983183	702,3643799	0,1660797	702,3634033	0,532902837	702,3538208	0,15684095	702,3538208	0,273049563	702,3538208	0,19646357
702,3892822	0,325468779	702,3883057	0,685326338	702,3787231	0,227760673	702,3787231	0,401313841	702,3883057	0,328648806	702,3892822	0,152770266	702,3892822	0,2099327	702,3892822	0,180871397	702,3883057	0,930834651	702,3787231	0,170215473	702,3787231	0,366176009	702,3787231	0,219990164
702,4141846	0,564704299	702,413208	1,184823871	702,4036255	0,389500737	702,4036255	0,670570791	702,413208	0,588471591	702,4141846	0,224642023	702,4141846	0,341107398	702,4141846	0,310083687	702,413208	1,531466365	702,4036255	0,270587683	702,4036255	0,597519398	702,4036255	0,358538538
702,4390869	0,88253665	702,4381104	1,712797046	702,4285278	0,640880585	702,4285278	1,043480158	702,4381104	0,900570989	702,4390869	0,288763881	702,4390869	0,51711756	702,4390869	0,474011481	702,4381104	2,11288023	702,4285278	0,442472935	702,4285278	0,944612026	702,4285278	0,592796564
702,4639893	1,193955183	702,4630127	2,253772974	702,4534302	0,942958057	702,4534302	1,273885727	702,4630127	1,368634224	702,4639893	0,409683704	702,4639893	0,764134645	702,4639893	0,711366117	702,4630127	2,534399509	702,4534302	0,660455167	702,4534302	1,156955242	702,4534302	0,827462971
702,4888916	1,412984729	702,487915	2,53794384	702,4783325	1,282348514	702,4783325	1,301243544	702,487915	1,857509613	702,4888916	0,670182228	702,4888916	1,228500247	702,4888916	1,121956825	702,487915	2,513910532	702,4783325	1,003951907	702,4783325	1,152920485	702,4783325	1,087807536
702,5137939	1,246928096	702,5128174	2,287473202	702,5032349	1,404713988	702,5032349	1,071084142	702,5128174	2,053599596	702,5137939	0,934517443	702,5137939	1,590360165	702,5137939	1,518223643	702,5128174	1,974431753	702,5032349	1,326173663	702,5032349	0,957398713	702,5032349	1,199422002
702,5386963	0,850480497	702,5377197	1,794057488	702,5281372	1,173458934	702,5281372	0,688073695	702,5377197	1,964464068	702,5386963	1,110500813	702,5386963	1,59295702	702,5386963	1,696734309	702,5377197	1,363705635	702,5281372	1,357394457	702,5281372	0,610932231	702,5281372	0,991153777
702,5635986	0,594510436	702,5626221	1,331453443	702,5531006	0,839396	702,5531006	0,419886053	702,5626221	1,675758123	702,5635986	1,15970695	702,5635986	1,36747694	702,5635986	1,631367207	702,5626221	0,946419954	702,5531006	1,15439415	702,5531006	0,357180238	702,5531006	0,707117736
702,588501	0,402835131	702,5875244	0,874533594	702,5780029	0,574058414	702,5780029	0,306364149	702,5875244	1,243396997	702,588501	0,995918214	702,588501	1,017366052	702,588501	1,299182057	702,5875244	0,584725857	702,5780029	0,871734262	702,5780029	0,267981738	702,5780029	0,503236055
702,6134033	0,264825583	702,6124268	0,604575455	702,6029053	0,395352185	702,6029053	0,211467654	702,6124268	0,935050905	702,6134033	0,77771157	702,6134033	0,727364182	702,6134033	0,990667522	702,6124268	0,380177796	702,6029053	0,636580467	702,6029053	0,198196471	702,6029053	0,354469001
702,6383057	0,18241547	702,6373291	0,477522254	702,6278076	0,264824152	702,6278076	0,135441661	702,6373291	0,739692152	702,6383057	0,608803511	702,6383057	0,522989094	702,6383057	0,744010448	702,6373291	0,32412523	702,6278076	0,438237816	702,6278076	0,125983924	702,6278076	0,229655936
702,663208	0,178127304	702,6622314	0,364475727	702,65271	0,200875849	702,65271	0,133776248	702,6622314	0,532851338	702,663208	0,456935972	702,663208	0,391535819	702,663208	0,543184519	702,6622314	0,263000727	702,65271	0,303692132	702,65271	0,113669366	702,65271	0,173271537
702,6881104	0,13408114	702,6871338	0,221105486	702,6776123	0,156296611	702,6776123	0,141991973	702,6871338	0,338546664	702,6881104	0,297233194	702,6881104	0,26906687	702,6881104	0,364816844	702,6871338	0,152512193	702,6776123	0,22418794	702,6776123	0,127224654	702,6776123	0,153745025
702,7130127	0,089502707	702,7120361	0,185989365	702,7025146	0,095215425	702,7025146	0,083083607	702,7120361	0,264698714	702,7130127	0,196585879	702,7130127	0,163737968	702,7130127	0,227630123	702,7120361	0,139176637	702,7025146	0,137160555	702,7025146	0,074199878	702,7025146	0,089948557
702,737915	0,118293062	702,7369385	0,190666601	702,727417	0,100886755	702,727417	0,090596795	702,7369385	0,226359472	702,737915	0,166748434	702,737915	0,161315367	702,737915	0,202136576	702,7369385	0,157558963	702,727417	0,124990329	702,727417	0,073267616	702,727417	0,09119834
702,7628174	0,099325798	702,7618408	0,118482731	702,7523193	0,10104908	702,7523193	0,105309784	702,7618408	0,145251647	702,7628174	0,13214086	702,7628174	0,14049764	702,7628174	0,15913558	702,7618408	0,089697815	702,7523193	0,123400919	702,7523193	0,099737264	702,7523193	0,107380092
702,7877197	0,057811536	702,7867432	0,100945242	702,7772217	0,058418356	702,7772217	0,052688085	702,7867432	0,126365855	702,7877197	0,088498697	702,7877197	0,086054184	702,7877197	0,105778247	702,7867432	0,08353588	702,7772217	0,074956551	702,7772217	0,056793012	702,7772217	0,058401205
702,8126221	0,077801228	702,8116455	0,140351415	702,802124	0,065168217	702,802124	0,055390034	702,8116455	0,143706143	702,8126221	0,103478737	702,8126221	0,100689359	702,8126221	0,115460329	702,8116455	0,12585485	702,802124	0,071561188	702,802124	0,051665101	702,802124	0,055813134
702,8375244	0,083731443	702,8365479	0,099352032	702,8270264	0,078783631	702,8270264	0,091828473	702,8365479	0,097124875	702,8375244	0,090818875	702,8375244	0,096720964	702,8375244	0,098900825	702,8365479	0,083234288	702,8270264	0,087630041	702,8270264	0,087988921	702,8270264	0,084697716
702,8624268	0,051283665	702,8615112	0,081892446	702,8519287	0,049420841	702,8519287	0,055960108	702,8615112	0,08526139	702,8624268	0,054411616	702,8624268	0,059320357	702,8624268	0,067144394	702,8615112	0,075539619	702,8519287	0,055611998	702,8519287	0,059289344	702,8519287	0,053151414
702,8873291	0,072084397	702,8864136	0,13028042	702,8768311	0,053113569	702,8768311	0,054153062	702,8864136	0,121807478	702,8873291	0,076101221	702,8873291	0,080245748	702,8873291	0,089397684	702,8864136	0,128157288	702,8768311	0,051334001	702,8768311	0,052451096	702,8768311	0,046680205
702,9122314	0,104272865	702,9113159	0,110866509	702,9017334	0,07782156	702,9017334	0,097445086	702,9113159	0,094965741	702,9122314	0,075098798	702,9122314	0,09310858	702,9122314	0,093380615	702,9113159	0,106190518	702,9017334	0,079716995	702,9017334	0,094689704	702,9017334	0,08667215
702,9371338	0,086005367	702,9362183	0,088395298	702,9266357	0,06075383	702,9266357	0,07734745	702,9362183	0,077879742	702,9371338	0,049613528	702,9371338	0,068705559	702,9371338	0,069914348	702,9362183	0,095937341	702,9266357	0,062081512	702,9266357	0,079791918	702,9266357	0,066915639
702,9620972	0,157469422	702,9611206	0,142899662	702,9515381	0,056880664	702,9515381	0,078346267	702,9611206	0,114565097	702,9620972	0,081136748	702,9620972	0,110787153	702,9620972	0,096777342	702,9611206	0,193622038	702,9515381	0,05358034	702,9515381	0,06648735	702,9515381	0,053483151
702,9869995	0,311028033	702,9860229	0,160139844	702,9764404	0,093549192	702,9764404	0,178667217	702,9860229	0,105041616	702,9869995	0,100187734	702,9869995	0,166364983	702,9869995	0,123662733	702,9860229	0,29703036	702,9764404	0,084359758	702,9764404	0,143436283	702,9764404	0,102156229
703,0119019	0,597865224	703,0109253	0,196389347	703,0013428	0,099696256	703,0013428	0,287165374	703,0109253	0,097145155	703,0119019	0,093782566	703,0119019	0,196983114	703,0119019	0,10687051	703,0109253	0,482452184	703,0013428	0,081020452	703,0013428	0,217467219	703,0013428	0,115479574
703,0368042	1,225690484	703,0358276	0,361678153	703,0262451	0,153318912	703,0262451	0,470298797	703,0358276	0,181107059	703,0368042	0,176413551	703,0368042	0,413939923	703,0368042	0,18903479	703,0358276	0,815617561	703,0262451	0,089880727	703,0262451	0,310416013	703,0262451	0,141950235
703,0617065	1,947937608	703,06073	0,485850751	703,0511475	0,2890926	703,0511475	0,743268371	703,06073	0,257840365	703,0617065	0,353115559	703,0617065	0,844091833	703,0617065	0,374698907	703,06073	1,000751019	703,0511475	0,181790069	703,0511475	0,474355996	703,0511475	0,290472984
703,0866089	2,167660236	703,0856323	0,490980327	703,0760498	0,402081758	703,0760498	0,785544455	703,0856323	0,30523631	703,0866089	0,577274501	703,0866089	1,293529987	703,0866089	0,591019928	703,0856323	0,920051157	703,0760498	0,278396755	703,0760498	0,500004292	703,0760498	0,40738219
703,1115112	1,862958431	703,1105347	0,501772761	703,1009521	0,434371531	703,1009521	0,613725901	703,1105347	0,381310761	703,1115112	0,909991682	703,1115112	1,643446445	703,1115112	0,865759075	703,1105347	0,781283617	703,1009521	0,350276411	703,1009521	0,379986882	703,1009521	0,419270337
703,1364136	1,399431229	703,135437	0,421104461	703,1258545	0,418173969	703,1258545	0,488406509	703,135437	0,372593045	703,1364136	1,166718006	703,1364136	1,700941443	703,1364136	1,009616256	703,135437	0,585158467	703,1258545	0,414765358	703,1258545	0,308143854	703,1258545	0,409066349
703,1613159	0,931349039	703,1603394	0,271370739	703,1508179	0,33012709	703,1508179	0,350591481	703,1603394	0,273282558	703,1613159	1,104179382	703,1613159	1,380151272	703,1613159	0,902831435	703,1603394	0,37488237	703,1508179	0,377149403	703,1508179	0,245078474	703,1508179	0,33711043
703,1862183	0,638372302	703,1852417	0,242719665	703,1757202	0,22539711	703,1757202	0,214963242	703,1852417	0,25028336	703,1862183	0,932314992	703,1862183	1,009587049	703,1862183	0,720549703	703,1852417	0,315760851	703,1757202	0,278613418	703,1757202	0,146908343	703,1757202	0,216396183
703,2111206	0,514431953	703,210144	0,219877765	703,2006226	0,194093704	703,2006226	0,192374557	703,210144	0,206796169	703,2111206	0,752493858	703,2111206	0,784220278	703,2111206	0,580134034	703,210144	0,274646193	703,2006226	0,235263944	703,2006226	0,13761732	703,2006226	0,18363212
703,2360229	0,413570523	703,2350464	0,139247224	703,2255249	0,150733665	703,2255249	0,18081601	703,2350464	0,136496097	703,2360229	0,583625019	703,2360229	0,619734704	703,2360229	0,450048625	703,2350464	0,187812999	703,2255249	0,187221065	703,2255249	0,146610215	703,2255249	0,163417727
703,2609253	0,315536529	703,2599487	0,138595447	703,2504272	0,115183815	703,2504272	0,136479482	703,2599487	0,128790826	703,2609253	0,446395248	703,2609253	0,463989943	703,2609253	0,347331852	703,2599487	0,186762199	703,2504272	0,136715189	703,2504272	0,113192014	703,2504272	0,115535527
703,2858276	0,295949608	703,2848511	0,177681461	703,2753296	0,104138486	703,2753296	0,134655744	703,2848511	0,150000587	703,2858276	0,37400195	703,2858276	0,389490485	703,2858276	0,302632958	703,2848511	0,238730028	703,2753296	0,114130937	703,2753296	0,097517878	703,2753296	0,100832671
703,31073	0,304669052	703,3097534	0,188196585	703,3002319	0,13644737	703,3002319	0,194837913	703,3097534	0,135660291	703,31073	0,308980376	703,31073	0,360022336	703,31073	0,266302526	703,3097534	0,263604045	703,3002319	0,136695623	703,3002319	0,15565154	703,3002319	0,141080454
703,3356323	0,264919758	703,3346558	0,216054723	703,3251343	0,137353346	703,3251343	0,221352354	703,3346558	0,128530204	703,3356323	0,212110385	703,3356323	0,27026087	703,3356323	0,196128041	703,3346558	0,348810613	703,3251343	0,127461538	703,3251343	0,196398184	703,3251343	0,140766963
703,3605347	0,332600266	703,3595581	0,439047277	703,3500366	0,167691305	703,3500366	0,295004755	703,3595581	0,220460281	703,3605347	0,221671283	703,3605347	0,286849707	703,3605347	0,212998018	703,3595581	0,662872255	703,3500366	0,124046862	703,3500366	0,273537993	703,3500366	0,152947009
703,385437	0,4888044	703,3844604	0,794074118	703,374939	0,309354126	703,374939	0,554754496	703,3844604	0,358070731	703,385437	0,243208006	703,385437	0,351393431	703,385437	0,275081158	703,3844604	1,097502828	703,374939	0,199473232	703,374939	0,531450212	703,374939	0,288042933
703,4103394	0,621083677	703,4093628	1,266080141	703,3998413	0,500183702	703,3998413	0,856489956	703,4093628	0,588081479	703,4103394	0,236167654	703,4103394	0,395594388	703,4103394	0,321038008	703,4093628	1,584950805	703,3998413	0,301776499	703,3998413	0,8196612	703,3998413	0,469126344
703,4352417	0,844335139	703,4342651	1,880134344	703,4247437	0,775070012	703,4247437	1,104516864	703,4342651	1,011359334	703,4352417	0,33297947	703,4352417	0,566438556	703,4352417	0,49294433	703,4342651	2,104908228	703,4247437	0,460455626	703,4247437	1,01934278	703,4247437	0,68174237
703,460144	1,07932961	703,4591675	2,291683674	703,449646	1,114240766	703,449646	1,320859551	703,4591675	1,46372211	703,460144	0,494553328	703,460144	0,827555776	703,460144	0,761124849	703,4591675	2,317615271	703,449646	0,759901404	703,449646	1,147422433	703,449646	0,994420528
703,4850464	1,079550982	703,4840698	2,293532133	703,4745483	1,314040303	703,4745483	1,255937099	703,4840698	1,767295837	703,4850464	0,635736763	703,4850464	1,023165584	703,4850464	1,010274172	703,4840698	2,083432674	703,4745483	1,038688421	703,4745483	1,060447574	703,4745483	1,168715715
703,5099487	0,915134728	703,5089722	2,035400391	703,4994507	1,28081286	703,4994507	0,926474869	703,5089722	1,919784427	703,5099487	0,808210671	703,5099487	1,155794621	703,5099487	1,213641167	703,5089722	1,669182301	703,4994507	1,170632958	703,4994507	0,761247694	703,4994507	1,106184602
703,5348511	0,72057122	703,5338745	1,587422848	703,524353	1,087772965	703,524353	0,640186429	703,5338745	1,774781942	703,5348511	0,949390352	703,5348511	1,181025624	703,5348511	1,334806681	703,5338745	1,186437607	703,524353	1,17272985	703,524353	0,523224473	703,524353	0,937721193
703,5597534	0,467771441	703,5588379	1,071694732	703,5492554	0,766230404	703,5492554	0,419192672	703,5588379	1,400398016	703,5597534	0,889312565	703,5597534	0,960460603	703,5597534	1,178322554	703,5588379	0,728106499	703,5492554	0,97399348	703,5492554	0,349405706	703,5492554	0,686066747
703,5846558	0,287619621	703,5837402	0,727873147	703,5741577	0,471718609	703,5741577	0,222795337	703,5837402	1,071796298	703,5846558	0,735904515	703,5846558	0,682736397	703,5846558	0,916473925	703,5837402	0,486854613	703,5741577	0,669272482	703,5741577	0,189220607	703,5741577	0,411733687
703,6095581	0,245179728	703,6086426	0,516903102	703,5990601	0,318814993	703,5990601	0,170449048	703,6086426	0,772874475	703,6095581	0,591986597	703,6095581	0,525759697	703,6095581	0,701426387	703,6086426	0,35006851	703,5990601	0,462689519	703,5990601	0,145898923	703,5990601	0,276374489
703,6344604	0,18862173	703,6335449	0,304066628	703,6239624	0,213459149	703,6239624	0,152018473	703,6335449	0,492798626	703,6344604	0,400843412	703,6344604	0,358292997	703,6344604	0,47494927	703,6335449	0,194266543	703,6239624	0,31540519	703,6239624	0,138963252	703,6239624	0,202299178
703,6593628	0,117243007	703,6584473	0,220887303	703,6488647	0,122277871	703,6488647	0,083054468	703,6584473	0,356211096	703,6593628	0,257640481	703,6593628	0,226660714	703,6593628	0,309394389	703,6584473	0,160125867	703,6488647	0,18153359	703,6488647	0,075156793	703,6488647	0,109045617
703,6843262	0,13959989	703,6833496	0,203114614	703,6737671	0,107966721	703,6737671	0,093986258	703,6833496	0,278701007	703,6843262	0,226103991	703,6843262	0,2004935	703,6843262	0,248017356	703,6833496	0,168250978	703,6737671	0,139692903	703,6737671	0,077754609	703,6737671	0,097367093
703,7092285	0,132194147	703,708252	0,120610148	703,6986694	0,108495489	703,6986694	0,111430749	703,708252	0,167985439	703,7092285	0,168305203	703,7092285	0,167293355	703,7092285	0,182441592	703,708252	0,095231399	703,6986694	0,130794391	703,6986694	0,105644532	703,6986694	0,113040365
703,7341309	0,076687887	703,7331543	0,099265501	703,7235718	0,063055739	703,7235718	0,057725314	703,7331543	0,13469927	703,7341309	0,106419571	703,7341309	0,098852769	703,7341309	0,120554164	703,7331543	0,080445699	703,7235718	0,081039563	703,7235718	0,057082903	703,7235718	0,061500642
703,7590332	0,091055587	703,7580566	0,124173529	703,7485352	0,06804388	703,7485352	0,05203034	703,7580566	0,14054665	703,7590332	0,115214974	703,7590332	0,123621836	703,7590332	0,125583142	703,7580566	0,107968517	703,7485352	0,07447464	703,7485352	0,0452976	703,7485352	0,057793222
703,7839355	0,085071094	703,782959	0,076122485	703,7734375	0,070562325	703,7734375	0,073734157	703,782959	0,085812807	703,7839355	0,091710448	703,7839355	0,116692744	703,7839355	0,103213742	703,782959	0,058821939	703,7734375	0,086507723	703,7734375	0,074175879	703,7734375	0,081387751
703,8088379	0,048956312	703,8078613	0,055678431	703,7983398	0,03514073	703,7983398	0,038063239	703,8078613	0,065091372	703,8088379	0,053367652	703,8088379	0,058474079	703,8088379	0,065530509	703,8078613	0,044563234	703,7983398	0,0503361	703,7983398	0,04280296	703,7983398	0,042420052
703,8337402	0,062429518	703,8327637	0,09065254	703,8232422	0,035592545	703,8232422	0,031119389	703,8327637	0,090107992	703,8337402	0,065355569	703,8337402	0,063999236	703,8337402	0,074521393	703,8327637	0,082389839	703,8232422	0,037782103	703,8232422	0,033712674	703,8232422	0,02917216
703,8586426	0,081113011	703,857666	0,067238115	703,8481445	0,054663926	703,8481445	0,067585781	703,857666	0,06239301	703,8586426	0,071566142	703,8586426	0,085438713	703,8586426	0,07836891	703,857666	0,057066951	703,8481445	0,057473876	703,8481445	0,071108893	703,8481445	0,060786068
703,8835449	0,056742676	703,8825684	0,048278514	703,8730469	0,044927046	703,8730469	0,059419014	703,8825684	0,045955881	703,8835449	0,043174468	703,8835449	0,061661351	703,8835449	0,054720797	703,8825684	0,040609997	703,8730469	0,052705899	703,8730469	0,069778413	703,8730469	0,057293773
703,9084473	0,045663089	703,9074707	0,065942816	703,8979492	0,026799681	703,8979492	0,032085542	703,9074707	0,061436284	703,9084473	0,034701385	703,9084473	0,042255066	703,9084473	0,043903053	703,9074707	0,059631076	703,8979492	0,03050351	703,8979492	0,039172404	703,8979492	0,032866828
703,9333496	0,087066635	703,932373	0,085334711	703,9228516	0,044989571	703,9228516	0,060553946	703,932373	0,071808241	703,9333496	0,059981838	703,9333496	0,072706573	703,9333496	0,072117932	703,932373	0,091020562	703,9228516	0,045541808	703,9228516	0,058376953	703,9228516	0,050469954
703,958252	0,103434242	703,9572754	0,050170988	703,9477539	0,052388724	703,9477539	0,098630697	703,9572754	0,038259298	703,958252	0,052694153	703,958252	0,074011765	703,958252	0,058624793	703,9572754	0,071933009	703,9477539	0,056879625	703,9477539	0,09486559	703,9477539	0,070978999
703,9831543	0,145306185	703,9821777	0,080111228	703,9726563	0,039723035	703,9726563	0,094741173	703,9821777	0,056913346	703,9831543	0,041130822	703,9831543	0,061916675	703,9831543	0,047488179	703,9821777	0,139147162	703,9726563	0,034963109	703,9726563	0,073805653	703,9726563	0,044232722
704,0080566	0,400851369	704,0070801	0,153301671	703,9975586	0,071187019	703,9975586	0,19418098	704,0070801	0,08923573	704,0080566	0,07629963	704,0080566	0,134611562	704,0080566	0,085942395	704,0070801	0,315714747	703,9975586	0,054886956	703,9975586	0,126304775	703,9975586	0,072051384
704,032959	0,824793398	704,0319824	0,175220788	704,0224609	0,12294735	704,0224609	0,362040848	704,0319824	0,074856326	704,032959	0,098591127	704,032959	0,256631285	704,032959	0,119894296	704,0319824	0,484953642	704,0224609	0,088807032	704,0224609	0,244013757	704,0224609	0,141439065
704,0578613	1,43354249	704,0568848	0,277078271	704,0473633	0,162117288	704,0473633	0,509846807	704,0568848	0,125812292	704,0578613	0,15810068	704,0578613	0,453271657	704,0578613	0,18366392	704,0568848	0,749874651	704,0473633	0,09238404	704,0473633	0,313675016	704,0473633	0,162324995
704,0827637	2,138135433	704,0817871	0,428591371	704,0722656	0,274750531	704,0722656	0,68966049	704,0817871	0,229715943	704,0827637	0,373283535	704,0827637	0,8821401	704,0827637	0,383961678	704,0817871	0,945997238	704,0722656	0,162251905	704,0722656	0,409110308	704,0722656	0,259519994
704,107666	2,263684273	704,1066895	0,419163078	704,097168	0,395470709	704,097168	0,726985097	704,1066895	0,257320195	704,107666	0,634935915	704,107666	1,341839075	704,107666	0,617099583	704,1066895	0,830855191	704,097168	0,278358877	704,097168	0,450244814	704,097168	0,391405016
704,1325684	1,756095648	704,1315918	0,356049627	704,1220703	0,391147614	704,1220703	0,539434969	704,1315918	0,275989056	704,1325684	0,91344744	704,1325684	1,599089146	704,1325684	0,805560529	704,1315918	0,624914885	704,1220703	0,322499901	704,1220703	0,332722098	704,1220703	0,385469556
704,1574707	1,234912276	704,1564941	0,329891115	704,1469727	0,337450951	704,1469727	0,380349755	704,1564941	0,295849532	704,1574707	1,122875094	704,1574707	1,539117813	704,1574707	0,919367731	704,1564941	0,494488358	704,1469727	0,334471941	704,1469727	0,224867627	704,1469727	0,32239458
704,182373	0,828837395	704,1813965	0,224244043	704,171875	0,287115842	704,171875	0,298101515	704,1813965	0,219027385	704,182373	1,077032089	704,182373	1,249650598	704,182373	0,8239851	704,1813965	0,312371045	704,171875	0,322814941	704,171875	0,199835092	704,171875	0,284323603
704,2072754	0,515446246	704,2062988	0,138133124	704,1967773	0,184037328	704,1967773	0,18598558	704,2062988	0,152464047	704,2072754	0,826986849	704,2072754	0,858974636	704,2072754	0,598141432	704,2062988	0,200531319	704,1967773	0,235872492	704,1967773	0,130113333	704,1967773	0,191380665
704,2321777	0,389824212	704,2312012	0,155340672	704,2216797	0,125009522	704,2216797	0,121644549	704,2312012	0,148942664	704,2321777	0,628725648	704,2321777	0,631717384	704,2321777	0,455035985	704,2312012	0,207924113	704,2216797	0,160675555	704,2216797	0,08317475	704,2216797	0,119258448
704,2570801	0,338908255	704,2561646	0,126835346	704,246582	0,126127183	704,246582	0,157103613	704,2561646	0,109803349	704,2570801	0,459317058	704,2570801	0,464222521	704,2570801	0,349780232	704,2561646	0,17419596	704,246582	0,146371841	704,246582	0,11889483	704,246582	0,134925187
704,2819824	0,254125535	704,2810669	0,092380196	704,2714844	0,094481707	704,2714844	0,144756779	704,2810669	0,078892916	704,2819824	0,301825583	704,2819824	0,320016116	704,2819824	0,224566028	704,2810669	0,15680033	704,2714844	0,108881049	704,2714844	0,115675099	704,2714844	0,104763754
704,3068848	0,303187519	704,3059692	0,166200951	704,2963867	0,08674302	704,2963867	0,163270786	704,3059692	0,11171788	704,3068848	0,254863292	704,3068848	0,269945621	704,3068848	0,197385997	704,3059692	0,298966259	704,2963867	0,080471702	704,2963867	0,109107837	704,2963867	0,080400467
704,3317871	0,400490612	704,3308716	0,27524358	704,3212891	0,143256724	704,3212891	0,296608418	704,3308716	0,138664305	704,3317871	0,231759578	704,3317871	0,296885848	704,3317871	0,206076264	704,3308716	0,49952206	704,3212891	0,113357782	704,3212891	0,21692951	704,3212891	0,145835072
704,3566895	0,449892312	704,3557739	0,462892562	704,3462524	0,206594616	704,3462524	0,459448248	704,3557739	0,186529666	704,3566895	0,187890142	704,3566895	0,282322377	704,3566895	0,18997553	704,3557739	0,815212727	704,3462524	0,140748665	704,3462524	0,373332739	704,3462524	0,214569435
704,3815918	0,569099307	704,3806763	0,913365185	704,3711548	0,336958587	704,3711548	0,692722678	704,3806763	0,402118683	704,3815918	0,225590944	704,3815918	0,351713121	704,3815918	0,271030188	704,3806763	1,383463264	704,3711548	0,189917639	704,3711548	0,588804305	704,3711548	0,321193635
704,4064941	0,773689628	704,4055786	1,454837322	704,3960571	0,622293651	704,3960571	1,036791205	704,4055786	0,711312532	704,4064941	0,331767768	704,4064941	0,500809133	704,4064941	0,421156883	704,4055786	1,915187955	704,3960571	0,376710385	704,3960571	0,903669894	704,3960571	0,600749791
704,4314575	0,870338857	704,430481	1,880383849	704,4209595	0,931331396	704,4209595	1,249563456	704,430481	1,09215343	704,4314575	0,400760472	704,4314575	0,633772075	704,4314575	0,577267349	704,430481	2,177273989	704,4209595	0,637833357	704,4209595	1,091729641	704,4209595	0,907897413
704,4563599	0,942681551	704,4553833	2,173161745	704,4458618	1,148208618	704,4458618	1,251094341	704,4553833	1,517023563	704,4563599	0,490452379	704,4563599	0,754539371	704,4563599	0,745208144	704,4553833	2,222619534	704,4458618	0,902597308	704,4458618	1,074936509	704,4458618	1,07823205
704,4812622	1,013693333	704,4802856	2,18576622	704,4707642	1,25677228	704,4707642	1,168787241	704,4802856	1,730665207	704,4812622	0,65318346	704,4812622	0,935864151	704,4812622	0,967377126	704,4802856	2,054538012	704,4707642	1,093687057	704,4707642	0,980072021	704,4707642	1,168082595
704,5061646	0,93328619	704,505188	1,966099262	704,4956665	1,249232888	704,4956665	0,999201894	704,505188	1,771843553	704,5061646	0,801324904	704,5061646	1,10996151	704,5061646	1,190880299	704,505188	1,675684452	704,4956665	1,212688565	704,4956665	0,844004154	704,4956665	1,174733758
704,5310669	0,637441337	704,5300903	1,52573657	704,5205688	1,030673504	704,5205688	0,647764325	704,5300903	1,63820529	704,5310669	0,851766944	704,5310669	1,063293338	704,5310669	1,245961428	704,5300903	1,157925725	704,5205688	1,170880795	704,5205688	0,557448685	704,5205688	0,969389021
704,5559692	0,444657207	704,5549927	1,145320773	704,5454712	0,727762699	704,5454712	0,379934818	704,5549927	1,410965443	704,5559692	0,865715444	704,5559692	0,941043496	704,5559692	1,182654023	704,5549927	0,812410712	704,5454712	0,962122023	704,5454712	0,319686681	704,5454712	0,66339618
704,5808716	0,327749312	704,579895	0,774195194	704,5703735	0,497952521	704,5703735	0,272333741	704,579895	1,056539655	704,5808716	0,746074259	704,5808716	0,736760259	704,5808716	0,970758617	704,579895	0,516600728	704,5703735	0,730274856	704,5703735	0,235725626	704,5703735	0,476957649
704,6057739	0,18746458	704,6047974	0,474405706	704,5952759	0,306267649	704,5952759	0,172091588	704,6047974	0,723430574	704,6057739	0,537842751	704,6057739	0,465664774	704,6057739	0,673182666	704,6047974	0,295360446	704,5952759	0,480811059	704,5952759	0,154240608	704,5952759	0,294368535
704,6306763	0,157049164	704,6296997	0,357058495	704,6201782	0,180468604	704,6201782	0,099602088	704,6296997	0,540711999	704,6306763	0,398254275	704,6306763	0,316769063	704,6306763	0,483731806	704,6296997	0,246709391	704,6201782	0,290344805	704,6201782	0,083927467	704,6201782	0,159980044
704,6555786	0,158149377	704,6546021	0,259517252	704,6450806	0,146859333	704,6450806	0,122754402	704,6546021	0,374408513	704,6555786	0,301140845	704,6555786	0,259057224	704,6555786	0,353670508	704,6546021	0,185024321	704,6450806	0,213674098	704,6450806	0,100055508	704,6450806	0,140353233
704,680481	0,097753666	704,6795044	0,151210904	704,6699829	0,104355395	704,6699829	0,10295891	704,6795044	0,230826899	704,680481	0,177423522	704,680481	0,161685139	704,680481	0,220959887	704,6795044	0,105333485	704,6699829	0,150269985	704,6699829	0,092131443	704,6699829	0,111040831
704,7053833	0,099107124	704,7044067	0,147076949	704,6948853	0,07086961	704,6948853	0,065123335	704,7044067	0,199461564	704,7053833	0,141686678	704,7053833	0,124485262	704,7053833	0,166930348	704,7044067	0,123188578	704,6948853	0,09215302	704,6948853	0,053283408	704,6948853	0,064431988
704,7302856	0,119649261	704,7293091	0,136339888	704,7197876	0,086031392	704,7197876	0,091953903	704,7293091	0,154621035	704,7302856	0,137002513	704,7302856	0,144829139	704,7302856	0,156420246	704,7293091	0,114361726	704,7197876	0,100709379	704,7197876	0,072193347	704,7197876	0,08305902
704,755188	0,078117304	704,7542114	0,074995749	704,7446899	0,069374584	704,7446899	0,074834369	704,7542114	0,09262117	704,755188	0,082318261	704,755188	0,0938017	704,755188	0,09601891	704,7542114	0,057982355	704,7446899	0,090342537	704,7446899	0,078103967	704,7446899	0,079909176
704,7800903	0,06188615	704,7791138	0,083343193	704,7695923	0,039811846	704,7695923	0,035197023	704,7791138	0,100295082	704,7800903	0,076698028	704,7800903	0,070000045	704,7800903	0,079812855	704,7791138	0,073610172	704,7695923	0,052337892	704,7695923	0,034718383	704,7695923	0,035664365
704,8049927	0,086624362	704,8040161	0,09306673	704,7944946	0,051395234	704,7944946	0,055210531	704,8040161	0,091877237	704,8049927	0,08826834	704,8049927	0,109271146	704,8049927	0,101089597	704,8040161	0,082931496	704,7944946	0,060118593	704,7944946	0,050344195	704,7944946	0,049399421
704,829895	0,063670158	704,8289185	0,049517844	704,819397	0,042655598	704,819397	0,057823125	704,8289185	0,050076712	704,829895	0,051519997	704,829895	0,072192103	704,829895	0,066621512	704,8289185	0,043866754	704,819397	0,057510503	704,819397	0,063674204	704,819397	0,056139257
704,8547974	0,045526844	704,8538208	0,062310986	704,8442993	0,025572894	704,8442993	0,030181583	704,8538208	0,063601762	704,8547974	0,043780025	704,8547974	0,042113185	704,8547974	0,050608329	704,8538208	0,060126308	704,8442993	0,031965643	704,8442993	0,031738549	704,8442993	0,024734013
704,8796997	0,085624218	704,8787231	0,085433491	704,8692017	0,042315461	704,8692017	0,052280691	704,8787231	0,075702392	704,8796997	0,065798707	704,8796997	0,075843938	704,8796997	0,07663019	704,8787231	0,085642099	704,8692017	0,042672884	704,8692017	0,050000347	704,8692017	0,03898761
704,9046021	0,086984321	704,9036255	0,047863632	704,894104	0,049118809	704,894104	0,071103558	704,9036255	0,039927796	704,9046021	0,048919287	704,9046021	0,06921006	704,9046021	0,056687038	704,9036255	0,050603908	704,894104	0,052378438	704,894104	0,078115664	704,894104	0,063629799
704,9295044	0,070170835	704,9285278	0,061818283	704,9190063	0,02792483	704,9190063	0,04323297	704,9285278	0,054408237	704,9295044	0,039121009	704,9295044	0,059857406	704,9295044	0,045828301	704,9285278	0,073615476	704,9190063	0,031217095	704,9190063	0,04480445	704,9190063	0,033129398
704,9544067	0,137085035	704,9534912	0,102461137	704,9439697	0,046511974	704,9439697	0,080946766	704,9534912	0,078294538	704,9544067	0,064964451	704,9544067	0,092877395	704,9544067	0,072726838	704,9534912	0,136155427	704,9439697	0,043366369	704,9439697	0,06348826	704,9439697	0,044879932
704,9793091	0,246104419	704,9783936	0,083091132	704,9688721	0,069129169	704,9688721	0,165537268	704,9783936	0,048629519	704,9793091	0,062277414	704,9793091	0,114441931	704,9793091	0,075005822	704,9783936	0,172723368	704,9688721	0,062348895	704,9688721	0,120370157	704,9688721	0,077259287
705,0042114	0,491910785	705,0032959	0,135546476	704,9937744	0,062748231	704,9937744	0,226591647	705,0032959	0,067361608	705,0042114	0,05605951	705,0042114	0,129079446	705,0042114	0,069349274	705,0032959	0,387667358	704,9937744	0,045219839	704,9937744	0,145097136	704,9937744	0,063608557
705,0291138	1,221940041	705,0281982	0,296518683	705,0186768	0,137358382	705,0186768	0,46178782	705,0281982	0,131701678	705,0291138	0,134435847	705,0291138	0,321097165	705,0291138	0,146280006	705,0281982	0,849151552	705,0186768	0,075425558	705,0186768	0,270677745	705,0186768	0,120896377
705,0540161	2,158250809	705,0531006	0,448504686	705,0435791	0,274214298	705,0435791	0,908490777	705,0531006	0,168692186	705,0540161	0,227608532	705,0540161	0,579626203	705,0540161	0,248189792	705,0531006	1,386724472	705,0435791	0,155461282	705,0435791	0,551475644	705,0435791	0,263247758
705,0789185	3,370720387	705,0780029	0,597162366	705,0684814	0,381230056	705,0684814	1,247888684	705,0780029	0,236564666	705,0789185	0,351552516	705,0789185	0,970048666	705,0789185	0,373698413	705,0780029	1,741443753	705,0684814	0,200953066	705,0684814	0,746078491	705,0684814	0,363023788
705,1038208	4,756858826	705,1029053	0,773150682	705,0933838	0,554082096	705,0933838	1,431447625	705,1029053	0,373127788	705,1038208	0,742139637	705,1038208	1,856250405	705,1038208	0,734651327	705,1029053	1,91674304	705,0933838	0,292610943	705,0933838	0,831629038	705,0933838	0,512835026
705,1287231	4,767726421	705,1278076	0,852728963	705,1182861	0,788003862	705,1182861	1,354307413	705,1278076	0,515652537	705,1287231	1,399992824	705,1287231	2,939409494	705,1287231	1,298499107	705,1278076	1,718576789	705,1182861	0,510051847	705,1182861	0,796160102	705,1182861	0,732381403
705,1536255	3,550244808	705,15271	0,692992389	705,1431885	0,789233685	705,1431885	0,982104182	705,15271	0,522648513	705,1536255	2,033131838	705,1536255	3,467686176	705,1536255	1,728160381	705,15271	1,207749248	705,1431885	0,666511059	705,1431885	0,604945362	705,1431885	0,764975607
705,1785889	2,256250858	705,1776123	0,54144913	705,1680908	0,599362016	705,1680908	0,584535658	705,1776123	0,508115172	705,1785889	2,346351147	705,1785889	3,144224882	705,1785889	1,829200864	705,1776123	0,838213742	705,1680908	0,627025127	705,1680908	0,354833007	705,1680908	0,572015584
705,2034912	1,466148973	705,2025146	0,420125425	705,1929932	0,432693481	705,1929932	0,393229306	705,2025146	0,422529489	705,2034912	2,196168184	705,2034912	2,414415836	705,2034912	1,597176671	705,2025146	0,590864599	705,1929932	0,517425299	705,1929932	0,243069887	705,1929932	0,415371597
705,2283936	0,937590539	705,227417	0,255133748	705,2178955	0,296304435	705,2178955	0,286319315	705,227417	0,276215672	705,2283936	1,668856621	705,2283936	1,637456417	705,2283936	1,185016751	705,227417	0,368111938	705,2178955	0,379253238	705,2178955	0,199814364	705,2178955	0,303877443
705,2532959	0,631508112	705,2523193	0,212524131	705,2427979	0,17686291	705,2427979	0,185097679	705,2523193	0,221234307	705,2532959	1,172678709	705,2532959	1,071869373	705,2532959	0,80677861	705,2523193	0,316286236	705,2427979	0,230218619	705,2427979	0,125058725	705,2427979	0,171831205
705,2781982	0,533348739	705,2772217	0,241803586	705,2677002	0,160415828	705,2677002	0,199707717	705,2772217	0,203420863	705,2781982	0,843116641	705,2781982	0,793433785	705,2781982	0,592655301	705,2772217	0,380817354	705,2677002	0,183519453	705,2677002	0,142369822	705,2677002	0,153009519
705,3031006	0,498034775	705,302124	0,264213502	705,2926025	0,170388594	705,2926025	0,318148732	705,302124	0,16186063	705,3031006	0,586143196	705,3031006	0,595104694	705,3031006	0,43653968	705,302124	0,553364873	705,2926025	0,168456271	705,2926025	0,239845902	705,2926025	0,185409218
705,3280029	0,499361575	705,3270264	0,575156987	705,3175049	0,210197344	705,3175049	0,652037263	705,3270264	0,236041367	705,3280029	0,421592802	705,3280029	0,446576983	705,3280029	0,323423773	705,3270264	1,366140127	705,3175049	0,137964368	705,3175049	0,455718547	705,3175049	0,219290867
705,3529053	0,853775144	705,3519287	1,46581161	705,3424072	0,531037748	705,3424072	1,857829571	705,3519287	0,518849671	705,3529053	0,408204585	705,3529053	0,479965359	705,3529053	0,351482391	705,3519287	3,235121012	705,3424072	0,228243753	705,3424072	1,2140311	705,3424072	0,53886646
705,3778076	1,5518682	705,3768311	2,889086008	705,3673096	1,450444937	705,3673096	4,238042831	705,3768311	1,100193977	705,3778076	0,448459148	705,3778076	0,630378902	705,3778076	0,471970588	705,3768311	5,675290108	705,3673096	0,548827887	705,3673096	2,654015064	705,3673096	1,504047275
705,40271	2,365979433	705,4017334	4,471086979	705,3922119	3,135323763	705,3922119	6,463904858	705,4017334	2,225442648	705,40271	0,688341975	705,40271	0,966453135	705,40271	0,794825315	705,4017334	7,308125019	705,3922119	1,263166785	705,3922119	3,827941418	705,3922119	3,195028782
705,4276123	2,784361601	705,4266357	5,307998657	705,4171143	4,987967491	705,4171143	6,474936008	705,4266357	3,578746557	705,4276123	1,293251753	705,4276123	1,580530643	705,4276123	1,473535061	705,4266357	7,102470875	705,4171143	2,513895273	705,4171143	3,767332077	705,4171143	4,977265835
705,4525146	2,486379147	705,4515381	4,924051285	705,4420166	5,531066895	705,4420166	4,761553764	705,4515381	4,387817383	705,4525146	2,11303854	705,4525146	2,096070051	705,4525146	2,224044561	705,4515381	5,575876236	705,4420166	3,738182545	705,4420166	2,87070632	705,4420166	5,508240223
705,477417	1,893225908	705,4764404	3,930293798	705,4669189	4,472110271	705,4669189	3,00735569	705,4764404	4,340228558	705,477417	2,673604965	705,477417	2,141025543	705,477417	2,577579498	705,4764404	3,927868366	705,4669189	3,948338032	705,4669189	1,894492269	705,4669189	4,45109129
705,5023193	1,392161727	705,5013428	2,977273703	705,4918213	3,07532382	705,4918213	1,806984425	705,5013428	3,754267693	705,5023193	2,749158621	705,5023193	1,936988115	705,5023193	2,513207197	705,5013428	2,696158886	705,4918213	3,23827219	705,4918213	1,161760569	705,4918213	3,030517101
705,5272217	0,967715263	705,5262451	2,097783566	705,5167236	2,00606513	705,5167236	1,128045917	705,5262451	2,918240786	705,5272217	2,341442823	705,5272217	1,619378567	705,5272217	2,121563673	705,5262451	1,752572894	705,5167236	2,357527494	705,5167236	0,750115097	705,5167236	1,988606215
705,552124	0,585191846	705,5511475	1,392008543	705,541687	1,234233737	705,541687	0,695803821	705,5511475	2,126399279	705,552124	1,746377826	705,552124	1,169939995	705,552124	1,620985866	705,5511475	1,108423948	705,541687	1,582717419	705,541687	0,479308993	705,541687	1,240400553
705,5770264	0,407664001	705,5760498	0,971930087	705,5665894	0,76744473	705,5665894	0,440829515	705,5760498	1,542628884	705,5770264	1,291915178	705,5770264	0,838230789	705,5770264	1,20813024	705,5760498	0,788249552	705,5665894	1,005961299	705,5665894	0,291288495	705,5665894	0,744917333
705,6019287	0,341770858	705,6009521	0,67059058	705,5914917	0,535813093	705,5914917	0,352378279	705,6009521	1,078382611	705,6019287	0,929201782	705,6019287	0,625833631	705,6019287	0,876907349	705,6009521	0,553039908	705,5914917	0,675078392	705,5914917	0,237213403	705,5914917	0,521803141
705,6268311	0,251141399	705,6259155	0,426261216	705,616394	0,3600609	705,616394	0,264999241	705,6259155	0,718631983	705,6268311	0,669654012	705,6268311	0,462437093	705,6268311	0,634931624	705,6259155	0,35971266	705,616394	0,454619884	705,616394	0,191897437	705,616394	0,371927351
705,6517334	0,198801503	705,6508179	0,352027982	705,6412964	0,259524167	705,6412964	0,184819505	705,6508179	0,573811352	705,6517334	0,508324027	705,6517334	0,343390256	705,6517334	0,482961476	705,6508179	0,319418281	705,6412964	0,31567046	705,6412964	0,128227398	705,6412964	0,251306534
705,6766357	0,202076986	705,6757202	0,328924328	705,6661987	0,228455633	705,6661987	0,189855829	705,6757202	0,482757002	705,6766357	0,4002662	705,6766357	0,292246073	705,6766357	0,375780374	705,6757202	0,318854898	705,6661987	0,263659567	705,6661987	0,126215652	705,6661987	0,217532888
705,7015381	0,192617998	705,7006226	0,225525841	705,6911011	0,205710247	705,6911011	0,211316675	705,7006226	0,325554252	705,7015381	0,292712986	705,7015381	0,246875137	705,7015381	0,2822963	705,7006226	0,219377637	705,6911011	0,224034876	705,6911011	0,155124068	705,6911011	0,218453959
705,7264404	0,138411269	705,7255249	0,170607314	705,7160034	0,148973525	705,7160034	0,142229378	705,7255249	0,241249502	705,7264404	0,191808492	705,7264404	0,153858274	705,7264404	0,187366173	705,7255249	0,173130572	705,7160034	0,157253429	705,7160034	0,102693021	705,7160034	0,155268908
705,7513428	0,165375039	705,7504272	0,191390306	705,7409058	0,131032243	705,7409058	0,112356611	705,7504272	0,22983861	705,7513428	0,186571106	705,7513428	0,16670312	705,7513428	0,181940258	705,7504272	0,202578753	705,7409058	0,127384886	705,7409058	0,07779713	705,7409058	0,120025389
705,7762451	0,160889655	705,7753296	0,141680405	705,7658081	0,13708806	705,7658081	0,13939479	705,7753296	0,168593362	705,7762451	0,159620225	705,7762451	0,172993705	705,7762451	0,156980887	705,7753296	0,148989782	705,7658081	0,137165189	705,7658081	0,110220708	705,7658081	0,140198305
705,8011475	0,095085904	705,8002319	0,096500896	705,7907104	0,093889542	705,7907104	0,095246069	705,8002319	0,120140679	705,8011475	0,105052285	705,8011475	0,111190148	705,8011475	0,108262882	705,8002319	0,103104733	705,7907104	0,098583147	705,7907104	0,084184103	705,7907104	0,102078602
705,8260498	0,105036788	705,8251343	0,132711813	705,8156128	0,077487968	705,8156128	0,065140255	705,8251343	0,137196869	705,8260498	0,124934472	705,8260498	0,122995161	705,8260498	0,120446235	705,8251343	0,141285762	705,8156128	0,073107168	705,8156128	0,050428487	705,8156128	0,069244131
705,8509521	0,119225308	705,8500366	0,106116027	705,8405151	0,095163777	705,8405151	0,097425304	705,8500366	0,108957097	705,8509521	0,120391183	705,8509521	0,133645505	705,8509521	0,111502238	705,8500366	0,109562546	705,8405151	0,09287861	705,8405151	0,083806708	705,8405151	0,101749286
705,8758545	0,070287913	705,874939	0,067572735	705,8654175	0,067743897	705,8654175	0,077539131	705,874939	0,075527221	705,8758545	0,066319406	705,8758545	0,07590609	705,8758545	0,070176482	705,874939	0,069042519	705,8654175	0,071074516	705,8654175	0,076947324	705,8654175	0,080155179
705,9008179	0,080553479	705,8998413	0,101117261	705,8903198	0,046956178	705,8903198	0,053495266	705,8998413	0,098556601	705,9008179	0,081608623	705,9008179	0,081222065	705,9008179	0,084531538	705,8998413	0,111919396	705,8903198	0,04816344	705,8903198	0,046869472	705,8903198	0,048012704
705,9257202	0,120397091	705,9247437	0,105237819	705,9152222	0,074623905	705,9152222	0,104542151	705,9247437	0,090950422	705,9257202	0,091196664	705,9257202	0,112826198	705,9257202	0,099545501	705,9247437	0,118913606	705,9152222	0,069162637	705,9152222	0,084626555	705,9152222	0,079028301
705,9506226	0,116496742	705,949646	0,071998931	705,9401245	0,072350539	705,9401245	0,118419461	705,949646	0,063155167	705,9506226	0,058869492	705,9506226	0,077688441	705,9506226	0,064911269	705,949646	0,098956339	705,9401245	0,066893235	705,9401245	0,097015113	705,9401245	0,085385434
705,9755249	0,216636926	705,9745483	0,135494843	705,9650269	0,062010542	705,9650269	0,138317734	705,9745483	0,096710183	705,9755249	0,077344641	705,9755249	0,091746084	705,9755249	0,073792167	705,9745483	0,21820955	705,9650269	0,049466301	705,9650269	0,088762738	705,9650269	0,062393326
706,0004272	0,526475251	705,9994507	0,207260326	705,9899292	0,115914546	705,9899292	0,311475009	705,9994507	0,115871824	706,0004272	0,114764825	706,0004272	0,181535974	706,0004272	0,120134942	705,9994507	0,412522644	705,9899292	0,083351105	705,9899292	0,189412966	705,9899292	0,121050291
706,0253296	1,063484073	706,024353	0,268366545	706,0148315	0,178764328	706,0148315	0,52014488	706,024353	0,122123703	706,0253296	0,119962305	706,0253296	0,275946259	706,0253296	0,136194199	706,024353	0,674422085	706,0148315	0,110773377	706,0148315	0,312427074	706,0148315	0,193328917
706,0502319	1,954767823	706,0492554	0,460877389	706,0397339	0,272096276	706,0397339	0,748564124	706,0492554	0,232722506	706,0502319	0,238845363	706,0502319	0,543477237	706,0502319	0,253773808	706,0492554	1,135093093	706,0397339	0,136631802	706,0397339	0,427045584	706,0397339	0,252931029
706,0751343	3,102751493	706,0741577	0,634134412	706,0646362	0,441007793	706,0646362	1,058723688	706,0741577	0,346549392	706,0751343	0,517996311	706,0751343	1,092381477	706,0751343	0,519287467	706,0741577	1,482631683	706,0646362	0,247265875	706,0646362	0,610745311	706,0646362	0,414014995
706,1000366	3,675863743	706,0990601	0,669775248	706,0895386	0,585439324	706,0895386	1,140196919	706,0990601	0,402467847	706,1000366	0,862381697	706,1000366	1,7457968	706,1000366	0,799612999	706,0990601	1,443622231	706,0895386	0,368299842	706,0895386	0,672770679	706,0895386	0,568350315
706,124939	3,235651731	706,1239624	0,659529686	706,1144409	0,622788668	706,1144409	0,891547263	706,1239624	0,492329001	706,124939	1,305912971	706,124939	2,331287861	706,124939	1,124745607	706,1239624	1,213195086	706,1144409	0,450978875	706,1144409	0,51918298	706,1144409	0,591482222
706,1498413	2,351004839	706,1488647	0,569475591	706,1394043	0,575961351	706,1394043	0,647060812	706,1488647	0,493220657	706,1498413	1,718012691	706,1498413	2,531086445	706,1498413	1,382562637	706,1488647	0,910313547	706,1394043	0,523565829	706,1394043	0,385963231	706,1394043	0,549714267
706,1747437	1,548003793	706,1737671	0,386638105	706,1643066	0,444576204	706,1643066	0,456740856	706,1737671	0,37776503	706,1747437	1,746341348	706,1747437	2,147880554	706,1747437	1,316443324	706,1737671	0,582871974	706,1643066	0,481503099	706,1643066	0,295141429	706,1643066	0,449243188
706,199646	1,081863046	706,1986694	0,297021866	706,189209	0,288753569	706,189209	0,27188918	706,1986694	0,313834637	706,199646	1,547721982	706,199646	1,672991991	706,199646	1,107643247	706,1986694	0,434644222	706,189209	0,346902132	706,189209	0,174413517	706,189209	0,284185082
706,2245483	0,85316968	706,2235718	0,278783351	706,2141113	0,232920259	706,2141113	0,225746393	706,2235718	0,280633986	706,2245483	1,331890225	706,2245483	1,318258286	706,2245483	0,933295667	706,2235718	0,396859109	706,2141113	0,281775773	706,2141113	0,137160525	706,2141113	0,219113052
706,2494507	0,693209112	706,2484741	0,239032283	706,2390137	0,203995347	706,2390137	0,226691827	706,2484741	0,228972062	706,2494507	1,004692197	706,2494507	0,976155937	706,2494507	0,710086524	706,2484741	0,347498596	706,2390137	0,240956202	706,2390137	0,153687567	706,2390137	0,204919457
706,274353	0,542243123	706,2733765	0,178563029	706,263916	0,158241108	706,263916	0,203768924	706,2733765	0,159836978	706,274353	0,692398131	706,274353	0,688422441	706,274353	0,490440667	706,2733765	0,293919653	706,263916	0,181028888	706,263916	0,154445827	706,263916	0,167534009
706,2992554	0,512065113	706,2982788	0,237470701	706,2888184	0,123365209	706,2888184	0,182817504	706,2982788	0,176328525	706,2992554	0,544394612	706,2992554	0,546445906	706,2992554	0,391965985	706,2982788	0,395781338	706,2888184	0,12560159	706,2888184	0,132344201	706,2888184	0,116806835
706,3241577	0,561392725	706,3232422	0,33754003	706,3137207	0,163939059	706,3137207	0,315428436	706,3232422	0,193052277	706,3241577	0,473754883	706,3241577	0,526792109	706,3241577	0,370628446	706,3232422	0,629888654	706,3137207	0,142727301	706,3137207	0,229624197	706,3137207	0,166448474
706,3490601	0,595134795	706,3481445	0,54281342	706,338623	0,237388834	706,338623	0,633969307	706,3481445	0,232111663	706,3490601	0,378336012	706,3490601	0,474922776	706,3490601	0,314217359	706,3481445	1,12985003	706,338623	0,16286473	706,338623	0,466643959	706,338623	0,255225927
706,3739624	0,782766759	706,3730469	1,077011347	706,3635254	0,461281806	706,3635254	1,304389119	706,3730469	0,452995509	706,3739624	0,374777555	706,3739624	0,494649678	706,3739624	0,339212567	706,3730469	2,077881098	706,3635254	0,213652328	706,3635254	0,878584266	706,3635254	0,459939748
706,3988647	1,176142097	706,3979492	1,765309453	706,3884277	1,026818514	706,3884277	2,294246435	706,3979492	0,848662853	706,3988647	0,471871018	706,3988647	0,648096621	706,3988647	0,487460405	706,3979492	2,952822685	706,3884277	0,460152477	706,3884277	1,451370835	706,3884277	1,035511494
706,4237671	1,379931211	706,4228516	2,200180769	706,4133301	1,765084505	706,4133301	2,693552256	706,4228516	1,333148718	706,4237671	0,604035139	706,4237671	0,832416475	706,4237671	0,688629031	706,4228516	3,101502419	706,4133301	0,887170315	706,4133301	1,65959537	706,4133301	1,765024662
706,4486694	1,307179332	706,4477539	2,297177076	706,4382324	2,176513672	706,4382324	2,166464329	706,4477539	1,813230157	706,4486694	0,872556806	706,4486694	1,043862939	706,4486694	0,990233243	706,4477539	2,712401152	706,4382324	1,360593438	706,4382324	1,345572472	706,4382324	2,137428045
706,4735718	1,123669982	706,4726563	2,050248146	706,4631348	2,011269331	706,4631348	1,489227057	706,4726563	1,984696031	706,4735718	1,187781096	706,4735718	1,182748914	706,4735718	1,274737477	706,4726563	2,111061811	706,4631348	1,647710085	706,4631348	0,970178306	706,4631348	1,971779466
706,4984741	0,836092889	706,4975586	1,592331409	706,4880371	1,496406198	706,4880371	0,968807518	706,4975586	1,797142386	706,4984741	1,273948908	706,4984741	1,09164834	706,4984741	1,292163491	706,4975586	1,466448426	706,4880371	1,516168952	706,4880371	0,681116164	706,4880371	1,48792398
706,5233765	0,574453652	706,5224609	1,206908584	706,5129395	0,98366487	706,5129395	0,555893362	706,5224609	1,52314496	706,5233765	1,140199304	706,5233765	0,899113297	706,5233765	1,128796816	706,5224609	1,018365502	706,5129395	1,134602427	706,5129395	0,403529674	706,5129395	0,965533912
706,5482788	0,432312369	706,5473633	0,895896912	706,5378418	0,654472768	706,5378418	0,369396567	706,5473633	1,222188711	706,5482788	0,960648179	706,5482788	0,759129763	706,5482788	0,971240163	706,5473633	0,724202216	706,5378418	0,821575046	706,5378418	0,26744777	706,5378418	0,634441257
706,5731812	0,311558425	706,5722656	0,58652246	706,5627441	0,437699497	706,5627441	0,288431644	706,5722656	0,874755025	706,5731812	0,724651933	706,5731812	0,570565045	706,5731812	0,749099672	706,5722656	0,44617188	706,5627441	0,579557896	706,5627441	0,224286035	706,5627441	0,443232149
706,5980835	0,191663787	706,597168	0,40645355	706,5876465	0,264369637	706,5876465	0,169527948	706,597168	0,629993737	706,5980835	0,501756251	706,5980835	0,374180019	706,5980835	0,525426269	706,597168	0,316306323	706,5876465	0,362656265	706,5876465	0,129617766	706,5876465	0,264656693
706,6229858	0,185771942	706,6220703	0,332319647	706,6125488	0,195436984	706,6125488	0,138394028	706,6220703	0,481833398	706,6229858	0,397469997	706,6229858	0,293897122	706,6229858	0,406973124	706,6220703	0,283179373	706,6125488	0,254469335	706,6125488	0,098350108	706,6125488	0,189136848
706,6479492	0,167349845	706,6469727	0,208929703	706,6374512	0,171538681	706,6374512	0,163093776	706,6469727	0,315594465	706,6479492	0,285385996	706,6479492	0,239149094	706,6479492	0,293832511	706,6469727	0,182351798	706,6374512	0,207254812	706,6374512	0,125916883	706,6374512	0,180751979
706,6728516	0,109798476	706,671875	0,14959681	706,6623535	0,106912121	706,6623535	0,10622932	706,671875	0,223708406	706,6728516	0,18786402	706,6728516	0,146462783	706,6728516	0,185726196	706,671875	0,131151497	706,6623535	0,132251173	706,6623535	0,080837786	706,6623535	0,115914665
706,6977539	0,133727118	706,6967773	0,16946353	706,6872559	0,094943039	706,6872559	0,095468909	706,6967773	0,212816924	706,6977539	0,177985787	706,6977539	0,147982851	706,6977539	0,171240687	706,6967773	0,167216629	706,6872559	0,104434207	706,6872559	0,064428054	706,6872559	0,087030217
706,7226563	0,137559399	706,7216797	0,120502375	706,7121582	0,112144269	706,7121582	0,128278673	706,7216797	0,144888282	706,7226563	0,14327541	706,7226563	0,142132014	706,7226563	0,145651728	706,7216797	0,114733398	706,7121582	0,118883617	706,7121582	0,101600051	706,7121582	0,117054813
706,7475586	0,094160035	706,746582	0,077345818	706,7370605	0,080156088	706,7370605	0,081199117	706,746582	0,100115068	706,7475586	0,083899833	706,7475586	0,088305958	706,7475586	0,092036158	706,746582	0,076645859	706,7370605	0,088155985	706,7370605	0,072241046	706,7370605	0,083325602
706,7724609	0,0948902	706,7714844	0,107274845	706,7620239	0,059776179	706,7620239	0,052144807	706,7714844	0,119366653	706,7724609	0,093907222	706,7724609	0,092339426	706,7724609	0,099133171	706,7714844	0,11346972	706,7620239	0,065883875	706,7620239	0,03879467	706,7620239	0,054664746
706,7973633	0,115837902	706,7963867	0,111122824	706,7869263	0,08054655	706,7869263	0,084958643	706,7963867	0,112312436	706,7973633	0,105492458	706,7973633	0,115311183	706,7973633	0,108512387	706,7963867	0,113564812	706,7869263	0,088609368	706,7869263	0,07125283	706,7869263	0,081190825
706,8222656	0,082153097	706,8212891	0,060876384	706,8118286	0,068583384	706,8118286	0,080507942	706,8212891	0,065481275	706,8222656	0,077767678	706,8222656	0,096239977	706,8222656	0,083278686	706,8212891	0,059836302	706,8118286	0,077256188	706,8118286	0,076387584	706,8118286	0,079718776
706,847168	0,050178025	706,8461914	0,069414325	706,836731	0,034472819	706,836731	0,038419459	706,8461914	0,073029399	706,847168	0,056623586	706,847168	0,062677555	706,847168	0,061240938	706,8461914	0,072632484	706,836731	0,042544484	706,836731	0,041749522	706,836731	0,037608441
706,8720703	0,074654594	706,8710938	0,101702616	706,8616333	0,049525458	706,8616333	0,053981204	706,8710938	0,092668772	706,8720703	0,075968765	706,8720703	0,085533448	706,8720703	0,081652485	706,8710938	0,10527347	706,8616333	0,051266298	706,8616333	0,047859918	706,8616333	0,046375614
706,8969727	0,086595125	706,8959961	0,066316247	706,8865356	0,061781459	706,8865356	0,082588069	706,8959961	0,057128794	706,8969727	0,05931367	706,8969727	0,08454746	706,8969727	0,070019402	706,8959961	0,062471654	706,8865356	0,066702932	706,8865356	0,083585218	706,8865356	0,075774483
706,921875	0,058128741	706,9208984	0,065564185	706,911438	0,037938412	706,911438	0,047379877	706,9208984	0,060056064	706,921875	0,042317241	706,921875	0,057026461	706,921875	0,050141834	706,9208984	0,078079171	706,911438	0,039208882	706,911438	0,050192431	706,911438	0,04207848
706,9467773	0,104796328	706,9458008	0,113585413	706,9363403	0,051471669	706,9363403	0,065749347	706,9458008	0,090522461	706,9467773	0,067891605	706,9467773	0,083883822	706,9467773	0,077523887	706,9458008	0,142824695	706,9363403	0,048041642	706,9363403	0,055338908	706,9363403	0,049164921
706,9716797	0,171112701	706,9707031	0,092943579	706,9612427	0,075030006	706,9612427	0,140452653	706,9707031	0,063843802	706,9716797	0,071719699	706,9716797	0,108966678	706,9716797	0,079010971	706,9707031	0,148533642	706,9612427	0,071228653	706,9612427	0,11721129	706,9612427	0,08771833
706,996582	0,277730882	706,9956055	0,115133233	706,986145	0,066888161	706,986145	0,179065168	706,9956055	0,068466917	706,996582	0,053125974	706,996582	0,090777844	706,996582	0,066231944	706,9956055	0,246645004	706,986145	0,053485174	706,986145	0,120756373	706,986145	0,075789064
707,0214844	0,662633657	707,0205688	0,236753359	707,0110474	0,108686261	707,0110474	0,311734051	707,0205688	0,127067298	707,0214844	0,105035581	707,0214844	0,196970463	707,0214844	0,117204599	707,0205688	0,533742607	707,0110474	0,065950707	707,0110474	0,179991007	707,0110474	0,098377228
707,0463867	1,371958852	707,0454712	0,324422449	707,0359497	0,206791773	707,0359497	0,584938586	707,0454712	0,148361728	707,0463867	0,172799021	707,0463867	0,404497653	707,0463867	0,195481271	707,0454712	0,864358664	707,0359497	0,127819434	707,0359497	0,363233596	707,0359497	0,203422174
707,0712891	2,287079334	707,0703735	0,441900432	707,0608521	0,299776793	707,0608521	0,832571805	707,0703735	0,205998331	707,0712891	0,289395303	707,0712891	0,720533371	707,0712891	0,298596531	707,0703735	1,191174865	707,0608521	0,167921528	707,0608521	0,501980186	707,0608521	0,292724133
707,0961914	3,044396877	707,0952759	0,604576945	707,0857544	0,430451155	707,0857544	0,954460084	707,0952759	0,338157892	707,0961914	0,596573651	707,0961914	1,295249939	707,0961914	0,570621431	707,0952759	1,358679533	707,0857544	0,253485292	707,0857544	0,549376965	707,0857544	0,402666807
707,1210938	2,927220583	707,1201782	0,592952967	707,1106567	0,561670423	707,1106567	0,873708606	707,1201782	0,400746197	707,1210938	0,986682236	707,1210938	1,893500805	707,1210938	0,88662082	707,1201782	1,141275525	707,1106567	0,406397104	707,1106567	0,520343423	707,1106567	0,540943682
707,1459961	2,096569061	707,1450806	0,454466969	707,1355591	0,515509069	707,1355591	0,603715718	707,1450806	0,38362208	707,1459961	1,311503649	707,1459961	2,082864523	707,1459961	1,066736579	707,1450806	0,786566019	707,1355591	0,462474167	707,1355591	0,370774388	707,1355591	0,506182909
707,1708984	1,374854803	707,1699829	0,382370651	707,1604614	0,381350756	707,1604614	0,365807444	707,1699829	0,365128726	707,1708984	1,487545729	707,1708984	1,871897459	707,1708984	1,095850825	707,1699829	0,581469357	707,1604614	0,410047621	707,1604614	0,216632828	707,1604614	0,357161373
707,1958008	0,932325363	707,1948853	0,294519901	707,1853638	0,29355064	707,1853638	0,284958839	707,1948853	0,290657699	707,1958008	1,32269156	707,1958008	1,436879873	707,1958008	0,943739176	707,1948853	0,421749443	707,1853638	0,348396182	707,1853638	0,187732607	707,1853638	0,286689997
707,2207031	0,620132446	707,2197876	0,182836175	707,2102661	0,202277631	707,2102661	0,210006878	707,2197876	0,191527158	707,2207031	0,977675974	707,2207031	0,972170472	707,2207031	0,673195481	707,2197876	0,280183464	707,2102661	0,254386663	707,2102661	0,15469344	707,2102661	0,210818782
707,2456055	0,475685	707,2446899	0,184759527	707,2351685	0,133890361	707,2351685	0,139264911	707,2446899	0,186237291	707,2456055	0,723937333	707,2456055	0,681943715	707,2456055	0,501750231	707,2446899	0,279238254	707,2351685	0,166640952	707,2351685	0,095172755	707,2351685	0,125356942
707,2705078	0,455872357	707,2695923	0,191557109	707,2600708	0,139150739	707,2600708	0,16614908	707,2695923	0,160802037	707,2705078	0,559732914	707,2705078	0,553065419	707,2705078	0,410069466	707,2695923	0,277024418	707,2600708	0,150979266	707,2600708	0,126649708	707,2600708	0,132500231
707,2954102	0,381446511	707,2944946	0,159570172	707,2849731	0,126695156	707,2849731	0,19540301	707,2944946	0,118209459	707,2954102	0,392444283	707,2954102	0,420983225	707,2954102	0,291786492	707,2944946	0,265252143	707,2849731	0,132822961	707,2849731	0,159923017	707,2849731	0,135548115
707,3203125	0,362400711	707,319397	0,250511318	707,3098755	0,119844973	707,3098755	0,230252787	707,319397	0,157780901	707,3203125	0,331460863	707,3203125	0,346533328	707,3203125	0,239727885	707,319397	0,439185649	707,3098755	0,098349534	707,3098755	0,167959243	707,3098755	0,115133904
707,3452148	0,41209957	707,3442993	0,374661535	707,3347778	0,174019739	707,3347778	0,366639555	707,3442993	0,201306939	707,3452148	0,321909279	707,3452148	0,362279952	707,3452148	0,2572456	707,3442993	0,65474987	707,3347778	0,126302615	707,3347778	0,266191065	707,3347778	0,169570804
707,3701782	0,501766801	707,3692017	0,513448238	707,3597412	0,27752164	707,3597412	0,612130702	707,3692017	0,235653356	707,3701782	0,291723162	707,3701782	0,382354766	707,3701782	0,269918561	707,3692017	0,90680927	707,3597412	0,183333486	707,3597412	0,445002794	707,3597412	0,292149693
707,3950806	0,595398962	707,394104	0,786109447	707,3846436	0,456413686	707,3846436	0,944748044	707,394104	0,377515554	707,3950806	0,27161777	707,3950806	0,371491611	707,3950806	0,273045838	707,394104	1,290711999	707,3846436	0,252090007	707,3846436	0,641051233	707,3846436	0,465006888
707,4199829	0,752106011	707,4190063	1,143111706	707,4095459	0,727330685	707,4095459	1,151889801	707,4190063	0,663625836	707,4199829	0,361430496	707,4199829	0,486159503	707,4199829	0,397049278	707,4190063	1,588266015	707,4095459	0,400863796	707,4095459	0,755999863	707,4095459	0,715582371
707,4448853	0,817906201	707,4439087	1,303832054	707,4344482	0,988265455	707,4344482	1,120046854	707,4439087	0,902355373	707,4448853	0,468409806	707,4448853	0,635646045	707,4448853	0,560159504	707,4439087	1,53207159	707,4344482	0,639938295	707,4344482	0,780286849	707,4344482	0,974931419
707,4697876	0,708140075	707,468811	1,253818393	707,4593506	0,971523046	707,4593506	0,840334594	707,468811	1,051837444	707,4697876	0,56583339	707,4697876	0,673746347	707,4697876	0,676143467	707,468811	1,26972568	707,4593506	0,777161598	707,4593506	0,63130182	707,4593506	0,962986827
707,4946899	0,603650451	707,4937134	1,151428342	707,4842529	0,799173713	707,4842529	0,560137331	707,4937134	1,121415615	707,4946899	0,685615659	707,4946899	0,724167824	707,4946899	0,802523851	707,4937134	1,035075068	707,4842529	0,758130014	707,4842529	0,429709643	707,4842529	0,762416303
707,5195923	0,484161407	707,5186157	0,920277536	707,5091553	0,619289637	707,5091553	0,41314894	707,5186157	1,029593587	707,5195923	0,700332701	707,5195923	0,71659261	707,5195923	0,824161708	707,5186157	0,75674659	707,5091553	0,677694142	707,5091553	0,327072591	707,5091553	0,600372314
707,5444946	0,314669013	707,5435181	0,635345995	707,5340576	0,427580267	707,5340576	0,274031639	707,5435181	0,824075401	707,5444946	0,571614504	707,5444946	0,550035655	707,5444946	0,689701319	707,5435181	0,476281732	707,5340576	0,529058337	707,5340576	0,231514126	707,5340576	0,423577011
707,569397	0,230080128	707,5684204	0,487518281	707,55896	0,268255323	707,55896	0,15686509	707,5684204	0,670181215	707,569397	0,484630883	707,569397	0,416702539	707,569397	0,564617932	707,5684204	0,359060466	707,55896	0,362024814	707,55896	0,128129393	707,55896	0,255294383
707,5942993	0,206915081	707,5933228	0,350544035	707,5838623	0,208069965	707,5838623	0,152574658	707,5933228	0,501299858	707,5942993	0,403107554	707,5942993	0,343250394	707,5942993	0,460308313	707,5933228	0,267850757	707,5838623	0,276043236	707,5838623	0,116379879	707,5838623	0,198239982
707,6192017	0,137398243	707,6182251	0,209796742	707,6087646	0,146930739	707,6087646	0,138143569	707,6182251	0,324427485	707,6192017	0,259854257	707,6192017	0,226604447	707,6192017	0,300795585	707,6182251	0,162474647	707,6087646	0,196985379	707,6087646	0,116124362	707,6087646	0,156750187
707,644104	0,108597539	707,6431274	0,185800195	707,633667	0,095547408	707,633667	0,091359682	707,6431274	0,26280272	707,644104	0,192307323	707,644104	0,162419215	707,644104	0,214006677	707,6431274	0,163954049	707,633667	0,120784059	707,633667	0,066856392	707,633667	0,090701304
707,6690063	0,141166821	707,6680298	0,168094739	707,6585693	0,115042135	707,6585693	0,111996785	707,6680298	0,206974685	707,6690063	0,185439557	707,6690063	0,16913785	707,6690063	0,194179848	707,6680298	0,150701657	707,6585693	0,119061284	707,6585693	0,08130227	707,6585693	0,103229195
707,6939087	0,107850574	707,6929321	0,096057534	707,6834717	0,097600438	707,6834717	0,107061476	707,6929321	0,125671193	707,6939087	0,122739255	707,6939087	0,123889223	707,6939087	0,134384006	707,6929321	0,080401964	707,6834717	0,108725131	707,6834717	0,090152547	707,6834717	0,108860843
707,718811	0,074896619	707,7178955	0,095435798	707,708374	0,057335872	707,708374	0,054392524	707,7178955	0,119179279	707,718811	0,084090836	707,718811	0,081965074	707,718811	0,098402627	707,7178955	0,089056194	707,708374	0,068312734	707,708374	0,04471609	707,708374	0,061991338
707,7437134	0,116282649	707,7427979	0,106361896	707,7332764	0,071079984	707,7332764	0,066172563	707,7427979	0,112543553	707,7437134	0,108876556	707,7437134	0,114694856	707,7437134	0,11464984	707,7427979	0,101135813	707,7332764	0,07624758	707,7332764	0,052540928	707,7332764	0,067000099
707,7686157	0,090514168	707,7677002	0,052601654	707,7581787	0,064113453	707,7581787	0,066361815	707,7677002	0,062149785	707,7686157	0,077005126	707,7686157	0,096921898	707,7686157	0,085625648	707,7677002	0,046855483	707,7581787	0,076161116	707,7581787	0,067477435	707,7581787	0,07403785
707,7935181	0,050556332	707,7926025	0,055633545	707,7830811	0,030931508	707,7830811	0,026904453	707,7926025	0,065345362	707,7935181	0,052221581	707,7935181	0,061252836	707,7935181	0,054421913	707,7926025	0,053640194	707,7830811	0,039094537	707,7830811	0,030680755	707,7830811	0,031159014
707,8184204	0,071720548	707,8175049	0,08387465	707,8079834	0,039860155	707,8079834	0,037657823	707,8175049	0,080307752	707,8184204	0,072447635	707,8184204	0,080446847	707,8184204	0,074217655	707,8175049	0,079465032	707,8079834	0,045378357	707,8079834	0,036621906	707,8079834	0,037588581
707,8433228	0,085590675	707,8424072	0,047223523	707,8328857	0,046377715	707,8328857	0,060671836	707,8424072	0,04410968	707,8433228	0,076165073	707,8433228	0,09487503	707,8433228	0,08445821	707,8424072	0,040408093	707,8328857	0,054994933	707,8328857	0,06126127	707,8328857	0,057889186
707,8682251	0,047953229	707,8673096	0,048312716	707,8577881	0,025410157	707,8577881	0,028130552	707,8673096	0,047590893	707,8682251	0,038348977	707,8682251	0,046209332	707,8682251	0,045392606	707,8673096	0,046514574	707,8577881	0,030742023	707,8577881	0,032154676	707,8577881	0,026333617
707,8931274	0,055678312	707,8922119	0,085580297	707,8826904	0,032894555	707,8826904	0,033602647	707,8922119	0,077968404	707,8931274	0,045509242	707,8931274	0,043627068	707,8931274	0,047215749	707,8922119	0,084832668	707,8826904	0,036140144	707,8826904	0,034360979	707,8826904	0,029505266
707,9180298	0,091813587	707,9171143	0,078082286	707,9075928	0,045228411	707,9075928	0,055663899	707,9171143	0,063787825	707,9180298	0,061279997	707,9180298	0,080079988	707,9180298	0,070657924	707,9171143	0,079105258	707,9075928	0,045606248	707,9075928	0,056563072	707,9075928	0,043875728
707,9429321	0,075982966	707,9420166	0,049282249	707,9324951	0,042308055	707,9324951	0,073163837	707,9420166	0,041654065	707,9429321	0,034962129	707,9429321	0,060661554	707,9429321	0,050936162	707,9420166	0,059266705	707,9324951	0,04670142	707,9324951	0,07706856	707,9324951	0,055099577
707,9678345	0,121170729	707,9669189	0,08974842	707,9574585	0,031460773	707,9574585	0,075033344	707,9669189	0,062413182	707,9678345	0,04049252	707,9678345	0,063066259	707,9678345	0,053796332	707,9669189	0,127377033	707,9574585	0,031114832	707,9574585	0,059440691	707,9574585	0,033315182
707,9927368	0,315314353	707,9918213	0,146295294	707,9823608	0,068619713	707,9823608	0,208577126	707,9918213	0,080161631	707,9927368	0,081465133	707,9927368	0,129520729	707,9927368	0,096927539	707,9918213	0,235353664	707,9823608	0,053385764	707,9823608	0,135247961	707,9823608	0,072307117
708,0176392	0,627892017	708,0167236	0,162635311	708,0072632	0,111650877	708,0072632	0,433299035	708,0167236	0,071514368	708,0176392	0,072156504	708,0176392	0,182753563	708,0176392	0,107677832	708,0167236	0,337970197	708,0072632	0,07598266	708,0072632	0,256163329	708,0072632	0,128551081
708,0425415	1,136863589	708,041626	0,279483259	708,0321655	0,173477992	708,0321655	0,662517965	708,041626	0,136169851	708,0425415	0,127130851	708,0425415	0,326608837	708,0425415	0,161778942	708,041626	0,559170485	708,0321655	0,084485129	708,0321655	0,331935227	708,0321655	0,165192038
708,0674438	1,701855779	708,0665283	0,394030184	708,0570679	0,316534251	708,0570679	0,844311953	708,0665283	0,213662401	708,0674438	0,302263051	708,0674438	0,6521644	708,0674438	0,335128963	708,0665283	0,734992623	708,0570679	0,172749996	708,0570679	0,433915585	708,0570679	0,303930759
708,0923462	1,886915684	708,0914307	0,375194967	708,0819702	0,40614754	708,0819702	0,808211088	708,0914307	0,226981118	708,0923462	0,4975501	708,0923462	0,983629167	708,0923462	0,504933	708,0914307	0,692434609	708,0819702	0,270988107	708,0819702	0,45105961	708,0819702	0,414736867
708,1173096	1,650993943	708,116333	0,369053274	708,1068726	0,383433342	708,1068726	0,589394867	708,116333	0,27546367	708,1173096	0,726426184	708,1173096	1,198611736	708,1173096	0,656232893	708,116333	0,603495657	708,1068726	0,299979955	708,1068726	0,33085537	708,1068726	0,385864049
708,1422119	1,257964015	708,1412354	0,344170481	708,1317749	0,354554325	708,1317749	0,434016317	708,1412354	0,295183092	708,1422119	0,935225427	708,1422119	1,292876363	708,1422119	0,770732701	708,1412354	0,494193047	708,1317749	0,334627032	708,1317749	0,246220127	708,1317749	0,341162384
708,1671143	0,867451906	708,1661377	0,216712072	708,1566772	0,288827926	708,1566772	0,329987884	708,1661377	0,214675665	708,1671143	0,935531497	708,1671143	1,142011642	708,1671143	0,721100509	708,1661377	0,305653304	708,1566772	0,31319505	708,1566772	0,206737012	708,1566772	0,295511425
708,1920166	0,559578001	708,19104	0,16465202	708,1815796	0,183441043	708,1815796	0,186905652	708,19104	0,175890625	708,1920166	0,778280914	708,1920166	0,831503212	708,1920166	0,568398476	708,19104	0,229857326	708,1815796	0,218379527	708,1815796	0,124201	708,1815796	0,184746161
708,2169189	0,439986944	708,2159424	0,181467831	708,2064819	0,143171042	708,2064819	0,150972798	708,2159424	0,171903551	708,2169189	0,63863939	708,2169189	0,639822483	708,2169189	0,469808459	708,2159424	0,236159846	708,2064819	0,172382206	708,2064819	0,098227285	708,2064819	0,134246618
708,2418213	0,371357173	708,2408447	0,119653858	708,2313843	0,135004878	708,2313843	0,171449408	708,2408447	0,10869813	708,2418213	0,470544189	708,2418213	0,485480666	708,2418213	0,353689075	708,2408447	0,171961799	708,2313843	0,155543402	708,2313843	0,130589217	708,2313843	0,13867487
708,2667236	0,278079838	708,2657471	0,103698321	708,2562866	0,086942337	708,2562866	0,124055356	708,2657471	0,090551712	708,2667236	0,329099566	708,2667236	0,337947339	708,2667236	0,241722301	708,2657471	0,157366663	708,2562866	0,102615058	708,2562866	0,094338089	708,2562866	0,090154588
708,291626	0,305307359	708,2906494	0,16954121	708,281189	0,08769422	708,281189	0,130097091	708,2906494	0,125974998	708,291626	0,293696314	708,291626	0,314712942	708,291626	0,228450671	708,2906494	0,24638781	708,281189	0,08647804	708,281189	0,090302981	708,281189	0,080561824
708,3165283	0,338374406	708,3155518	0,189760193	708,3060913	0,124024205	708,3060913	0,219317898	708,3155518	0,114307053	708,3165283	0,246578336	708,3165283	0,30161795	708,3165283	0,206963763	708,3155518	0,300332844	708,3060913	0,114886686	708,3060913	0,168348715	708,3060913	0,133089095
708,3414307	0,343849868	708,3404541	0,262134433	708,3309937	0,139780149	708,3309937	0,274443835	708,3404541	0,133770198	708,3414307	0,187845379	708,3414307	0,249303147	708,3414307	0,172348425	708,3404541	0,440671116	708,3309937	0,106948599	708,3309937	0,21818082	708,3309937	0,144042462
708,366333	0,46461156	708,3653564	0,499041319	708,355896	0,200359225	708,355896	0,394996613	708,3653564	0,25331676	708,366333	0,228038698	708,366333	0,308660716	708,366333	0,2201332	708,3653564	0,772470295	708,355896	0,130810708	708,355896	0,303185493	708,355896	0,186296478
708,3912354	0,588309705	708,3903198	0,767047644	708,3807983	0,354663998	708,3807983	0,651357174	708,3903198	0,387161225	708,3912354	0,250449389	708,3912354	0,376445472	708,3912354	0,272971958	708,3903198	1,094247818	708,3807983	0,234243646	708,3807983	0,519095659	708,3807983	0,354859173
708,4161377	0,661225617	708,4152222	0,956819654	708,4057007	0,511628866	708,4057007	0,81390065	708,4152222	0,512237489	708,4161377	0,270065397	708,4161377	0,4453471	708,4161377	0,328787446	708,4152222	1,264262199	708,4057007	0,331986934	708,4057007	0,680342436	708,4057007	0,514940083
708,44104	0,721261501	708,4401245	1,187992096	708,430603	0,621465981	708,430603	0,823494792	708,4401245	0,740433633	708,44104	0,330569714	708,44104	0,529676735	708,44104	0,445272535	708,4401245	1,420472741	708,430603	0,412927806	708,430603	0,700449884	708,430603	0,609496713
708,4659424	0,756705642	708,4650269	1,359607816	708,4555054	0,747352123	708,4555054	0,814600408	708,4650269	1,014500976	708,4659424	0,470383763	708,4659424	0,710167527	708,4659424	0,652463615	708,4650269	1,415524125	708,4555054	0,559766054	708,4555054	0,702187359	708,4555054	0,737169445
708,4908447	0,644123077	708,4899292	1,233959079	708,4804077	0,7816782	708,4804077	0,686521769	708,4899292	1,115142584	708,4908447	0,563129723	708,4908447	0,786242306	708,4908447	0,786917508	708,4899292	1,128219366	708,4804077	0,694227755	708,4804077	0,604404211	708,4804077	0,786381125
708,5157471	0,450487345	708,5148315	1,020910978	708,5053101	0,635596454	708,5053101	0,446406513	708,5148315	1,115038991	708,5157471	0,578939199	708,5157471	0,706749976	708,5157471	0,804632425	708,5148315	0,840580404	708,5053101	0,666341126	708,5053101	0,393797249	708,5053101	0,631337643
708,5406494	0,346914947	708,5397339	0,809501588	708,5302124	0,489019662	708,5302124	0,305486858	708,5397339	1,006634831	708,5406494	0,580602109	708,5406494	0,612434983	708,5406494	0,782324731	708,5397339	0,624098778	708,5302124	0,583956659	708,5302124	0,254166007	708,5302124	0,470693409
708,5655518	0,256323487	708,5646362	0,536971331	708,5551758	0,359067202	708,5551758	0,24021858	708,5646362	0,762874544	708,5655518	0,486876905	708,5655518	0,484930396	708,5655518	0,646558046	708,5646362	0,377825022	708,5551758	0,475600213	708,5551758	0,2020455	708,5551758	0,367386431
708,5904541	0,147393525	708,5895386	0,347506553	708,5800781	0,211319849	708,5800781	0,131974176	708,5895386	0,553860068	708,5904541	0,356774241	708,5904541	0,319086194	708,5904541	0,455338448	708,5895386	0,235500559	708,5800781	0,314086646	708,5800781	0,114514962	708,5800781	0,218480468
708,6153564	0,132552266	708,6144409	0,287206113	708,6049805	0,143262312	708,6049805	0,091666311	708,6144409	0,434758544	708,6153564	0,298619241	708,6153564	0,248312175	708,6153564	0,352336347	708,6144409	0,216302291	708,6049805	0,209747717	708,6049805	0,072460495	708,6049805	0,135030314
708,6402588	0,135129139	708,6393433	0,187413752	708,6298828	0,13077718	708,6298828	0,119300634	708,6393433	0,287113518	708,6402588	0,220380843	708,6402588	0,200185895	708,6402588	0,261467725	708,6393433	0,139160812	708,6298828	0,170440763	708,6298828	0,100100853	708,6298828	0,135677323
708,6651611	0,083953135	708,6642456	0,112891629	708,6547852	0,08321695	708,6547852	0,081671052	708,6642456	0,184027091	708,6651611	0,130260065	708,6651611	0,113106921	708,6651611	0,160748988	708,6642456	0,087003097	708,6547852	0,110359609	708,6547852	0,074862048	708,6547852	0,090099044
708,6900635	0,092770092	708,6891479	0,135968968	708,6796875	0,066155024	708,6796875	0,059350509	708,6891479	0,174899176	708,6900635	0,126283035	708,6900635	0,116101466	708,6900635	0,14165324	708,6891479	0,11940261	708,6796875	0,075979598	708,6796875	0,047059592	708,6796875	0,057728611
708,7149658	0,106654085	708,7140503	0,106989466	708,7045898	0,08304321	708,7045898	0,088250265	708,7140503	0,125160083	708,7149658	0,112716079	708,7149658	0,116488375	708,7149658	0,125194505	708,7140503	0,091419496	708,7045898	0,095109195	708,7045898	0,074981146	708,7045898	0,087554581
708,7398682	0,057076622	708,7389526	0,058276772	708,7294922	0,056903265	708,7294922	0,057542693	708,7389526	0,077095218	708,7398682	0,061991204	708,7398682	0,068039298	708,7398682	0,073391818	708,7389526	0,05109537	708,7294922	0,074215978	708,7294922	0,059783116	708,7294922	0,068276294
708,7647705	0,060843263	708,763855	0,083285794	708,7543945	0,037299056	708,7543945	0,033205364	708,763855	0,093717247	708,7647705	0,070293047	708,7647705	0,070240147	708,7647705	0,078092568	708,763855	0,076158136	708,7543945	0,047341391	708,7543945	0,0284166	708,7543945	0,034514423
708,7896729	0,077342384	708,7887573	0,081587359	708,7792969	0,054602582	708,7792969	0,056209914	708,7887573	0,079823337	708,7896729	0,078242823	708,7896729	0,096503466	708,7896729	0,086890586	708,7887573	0,066987932	708,7792969	0,059716068	708,7792969	0,051666126	708,7792969	0,051604904
708,8145752	0,040974624	708,8136597	0,042910647	708,8041992	0,040578697	708,8041992	0,04841648	708,8136597	0,047449984	708,8145752	0,039594855	708,8145752	0,04596816	708,8145752	0,051027898	708,8136597	0,03590031	708,8041992	0,053106502	708,8041992	0,057386018	708,8041992	0,050704923
708,8394775	0,043048095	708,838562	0,067871764	708,8291016	0,026656883	708,8291016	0,026396492	708,838562	0,065609321	708,8394775	0,045617308	708,8394775	0,040895328	708,8394775	0,054262076	708,838562	0,05978578	708,8291016	0,030594744	708,8291016	0,028246081	708,8291016	0,026191259
708,8644409	0,069079928	708,8634644	0,081458032	708,8540039	0,044166271	708,8540039	0,051955994	708,8634644	0,067136854	708,8644409	0,059651297	708,8644409	0,071217991	708,8644409	0,070655413	708,8634644	0,070275657	708,8540039	0,047902249	708,8540039	0,049065918	708,8540039	0,046789929
708,8893433	0,054702319	708,8883667	0,045720879	708,8789063	0,044386771	708,8789063	0,059162863	708,8883667	0,041373204	708,8893433	0,035137821	708,8893433	0,051001009	708,8893433	0,043381952	708,8883667	0,045253612	708,8789063	0,048575614	708,8789063	0,06317009	708,8789063	0,05258574
708,9142456	0,063333869	708,913269	0,070043594	708,9038086	0,028636165	708,9038086	0,037577868	708,913269	0,063326456	708,9142456	0,037978023	708,9142456	0,049060509	708,9142456	0,045487322	708,913269	0,077215612	708,9038086	0,029578662	708,9038086	0,042117208	708,9038086	0,027920043
708,9391479	0,099939466	708,9381714	0,108397111	708,9287109	0,052891634	708,9287109	0,078970008	708,9381714	0,079701327	708,9391479	0,056260549	708,9391479	0,070201635	708,9391479	0,065447763	708,9381714	0,119761407	708,9287109	0,049309298	708,9287109	0,070445657	708,9287109	0,053115927
708,9640503	0,1527282	708,9630737	0,085427031	708,9536133	0,064522453	708,9536133	0,119456559	708,9630737	0,058970056	708,9640503	0,061950721	708,9640503	0,108331852	708,9640503	0,079489805	708,9630737	0,102249429	708,9536133	0,064378954	708,9536133	0,10592059	708,9536133	0,080976784
708,9889526	0,172835201	708,9879761	0,074308209	708,9785156	0,051733252	708,9785156	0,125895351	708,9879761	0,052653428	708,9889526	0,050011605	708,9889526	0,093857877	708,9889526	0,067708373	708,9879761	0,124477223	708,9785156	0,049035724	708,9785156	0,103907354	708,9785156	0,064226151
709,013855	0,379816175	709,0128784	0,157666564	709,003418	0,067739226	709,003418	0,207214937	709,0128784	0,097983003	709,013855	0,092533894	709,013855	0,164566383	709,013855	0,108637609	709,0128784	0,283973575	709,003418	0,049648974	709,003418	0,134628251	709,003418	0,06363409
709,0387573	0,761028647	709,0377808	0,211547598	709,0283203	0,138531119	709,0283203	0,426197469	709,0377808	0,103093766	709,0387573	0,133431375	709,0387573	0,298835367	709,0387573	0,154562652	709,0377808	0,440808773	709,0283203	0,098085806	709,0283203	0,285869986	709,0283203	0,147123531
709,0636597	1,20475769	709,0626831	0,257994562	709,0532227	0,200772926	709,0532227	0,600951374	709,0626831	0,119758695	709,0636597	0,170723096	709,0636597	0,467440754	709,0636597	0,199793369	709,0626831	0,571844161	709,0532227	0,129069239	709,0532227	0,416146398	709,0532227	0,215101615
709,088562	1,556579232	709,0876465	0,367326468	709,078125	0,277829438	709,078125	0,652538359	709,0876465	0,2148588	709,088562	0,356635004	709,088562	0,820698619	709,088562	0,385960907	709,0876465	0,674579263	709,078125	0,178643942	709,078125	0,438499391	709,078125	0,283648968
709,1134644	1,526970625	709,1125488	0,368153811	709,1030273	0,367145181	709,1030273	0,616332173	709,1125488	0,259464413	709,1134644	0,603427589	709,1134644	1,211810946	709,1134644	0,622594953	709,1125488	0,592084467	709,1030273	0,294887394	709,1030273	0,420238107	709,1030273	0,388391405
709,1383667	1,135817528	709,1374512	0,275916904	709,1279297	0,34404102	709,1279297	0,463776797	709,1374512	0,237026155	709,1383667	0,76766932	709,1383667	1,292833328	709,1383667	0,719967186	709,1374512	0,410654038	709,1279297	0,343321234	709,1279297	0,322151542	709,1279297	0,37318027
709,163269	0,834016562	709,1623535	0,252766192	709,1528931	0,260677338	709,1528931	0,294884652	709,1623535	0,240128592	709,163269	0,84671247	709,163269	1,162641168	709,163269	0,736837864	709,1623535	0,344991595	709,1528931	0,30374378	709,1528931	0,193448767	709,1528931	0,267944872
709,1881714	0,637748897	709,1872559	0,209828049	709,1777954	0,224449977	709,1777954	0,240474254	709,1872559	0,203120038	709,1881714	0,803348958	709,1881714	0,960384846	709,1881714	0,665608227	709,1872559	0,274912775	709,1777954	0,276592106	709,1777954	0,171990767	709,1777954	0,231646031
709,2130737	0,454019397	709,2121582	0,131400615	709,2026978	0,167987853	709,2026978	0,193351567	709,2121582	0,130707011	709,2130737	0,609498084	709,2130737	0,692298889	709,2130737	0,484100759	709,2121582	0,182908669	709,2026978	0,216967538	709,2026978	0,156974748	709,2026978	0,18540673
709,2379761	0,350099355	709,2370605	0,148630098	709,2276001	0,110934339	709,2276001	0,133768946	709,2370605	0,135971114	709,2379761	0,469212413	709,2379761	0,511444449	709,2379761	0,365695208	709,2370605	0,202712134	709,2276001	0,143711686	709,2276001	0,102364317	709,2276001	0,112042077
709,2628784	0,356985509	709,2619629	0,167435378	709,2525024	0,123665296	709,2525024	0,163117766	709,2619629	0,136373758	709,2628784	0,407377481	709,2628784	0,44524321	709,2628784	0,327130824	709,2619629	0,222757459	709,2525024	0,137781486	709,2525024	0,123310812	709,2525024	0,122353345
709,2877808	0,301421762	709,2868652	0,137646526	709,2774048	0,119284473	709,2774048	0,177753955	709,2868652	0,104589783	709,2877808	0,295861036	709,2877808	0,360272765	709,2877808	0,249470785	709,2868652	0,206755355	709,2774048	0,130634218	709,2774048	0,152461171	709,2774048	0,132995725
709,3126831	0,29088819	709,3117676	0,220116675	709,3023071	0,097540863	709,3023071	0,17093417	709,3117676	0,137045965	709,3126831	0,238339677	709,3126831	0,285736263	709,3126831	0,211462602	709,3117676	0,36928165	709,3023071	0,09709993	709,3023071	0,131007999	709,3023071	0,102343239
709,3375854	0,462417036	709,3366699	0,421529591	709,3272095	0,157098576	709,3272095	0,3098405	709,3366699	0,215474397	709,3375854	0,260098517	709,3375854	0,346336305	709,3375854	0,247792631	709,3366699	0,760077834	709,3272095	0,128791392	709,3272095	0,242424846	709,3272095	0,151878834
709,3624878	0,796129823	709,3615723	0,749123991	709,3521118	0,246453166	709,3521118	0,610696971	709,3615723	0,314797312	709,3624878	0,246546045	709,3624878	0,4173145	709,3624878	0,278743625	709,3615723	1,369455457	709,3521118	0,175463781	709,3521118	0,485993743	709,3521118	0,265070289
709,3873901	1,368123531	709,3864746	1,378186464	709,3770142	0,409216404	709,3770142	0,985675693	709,3864746	0,644698918	709,3873901	0,312026739	709,3873901	0,641068816	709,3873901	0,419845968	709,3864746	2,186109543	709,3770142	0,238242388	709,3770142	0,77214098	709,3770142	0,424491853
709,4122925	1,921835065	709,411377	2,043536663	709,4019165	0,743475318	709,4019165	1,350901961	709,411377	1,159346938	709,4122925	0,57562089	709,4122925	1,178183079	709,4122925	0,854787767	709,411377	2,711215019	709,4019165	0,460527301	709,4019165	1,03772378	709,4019165	0,762887359
709,4371948	2,038053751	709,4362793	2,33219409	709,4268188	1,048041821	709,4268188	1,375490189	709,4362793	1,639454961	709,4371948	0,852744401	709,4371948	1,666385293	709,4371948	1,307832241	709,4362793	2,629037619	709,4268188	0,769837558	709,4268188	1,101322532	709,4268188	1,093980908
709,4620972	1,765654325	709,4611816	2,353880405	709,4517212	1,113432884	709,4517212	1,137806058	709,4611816	1,927290082	709,4620972	1,159751415	709,4620972	1,933474302	709,4620972	1,710223913	709,4611816	2,431554556	709,4517212	0,980907738	709,4517212	0,975068033	709,4517212	1,140170455
709,4869995	1,358875275	709,486084	2,285087109	709,4766235	1,090879798	709,4766235	1,024198532	709,486084	2,076468945	709,4869995	1,558511734	709,4869995	2,031242609	709,4869995	2,097044706	709,486084	2,28019166	709,4766235	1,070949435	709,4766235	0,931604743	709,4766235	1,08199048
709,5119019	1,064280987	709,5109863	2,115105391	709,5015259	1,0634377	709,5015259	0,997290492	709,5109863	2,033505678	709,5119019	1,667400599	709,5119019	1,828087926	709,5119019	2,10182786	709,5109863	2,04671979	709,5015259	1,076845884	709,5015259	0,972391963	709,5015259	1,051508307
709,5368042	0,781171024	709,5358887	1,838765621	709,5264282	1,050355434	709,5264282	0,889942944	709,5358887	1,822209954	709,5368042	1,437629461	709,5368042	1,425539255	709,5368042	1,781556368	709,5358887	1,666384459	709,5264282	1,009242535	709,5264282	0,899857581	709,5264282	0,989165545
709,5617065	0,573142588	709,560791	1,532383919	709,5513306	0,982193708	709,5513306	0,621977389	709,560791	1,64569521	709,5617065	1,19429183	709,5617065	1,086899281	709,5617065	1,459489226	709,560791	1,275985599	709,5513306	0,928586841	709,5513306	0,633247256	709,5513306	0,866388619
709,5866699	0,458966821	709,5856934	1,167538524	709,5762329	0,818409264	709,5762329	0,439514995	709,5856934	1,381144047	709,5866699	0,996971905	709,5866699	0,887053668	709,5866699	1,21777308	709,5856934	0,895564198	709,5762329	0,865870476	709,5762329	0,424909979	709,5762329	0,716942787
709,6115723	0,315933049	709,6105957	0,768354833	709,6011353	0,566569746	709,6011353	0,305836469	709,6105957	1,027992845	709,6115723	0,75936985	709,6115723	0,644725442	709,6115723	0,932677746	709,6105957	0,544533253	709,6011353	0,695219278	709,6011353	0,296015173	709,6011353	0,51245904
709,6364746	0,217302904	709,635498	0,546704888	709,6260376	0,344963849	709,6260376	0,173730895	709,635498	0,767827213	709,6364746	0,568325698	709,6364746	0,446165591	709,6364746	0,676685512	709,635498	0,394232243	709,6260376	0,46427992	709,6260376	0,167635113	709,6260376	0,300453156
709,661377	0,217869997	709,6604004	0,412528694	709,6509399	0,250182122	709,6509399	0,153532833	709,6604004	0,564484537	709,661377	0,45201245	709,661377	0,376924276	709,661377	0,527853966	709,6604004	0,312693447	709,6509399	0,332936376	709,6509399	0,136016309	709,6509399	0,221012071
709,6862793	0,169897422	709,6853027	0,251189619	709,6758423	0,186086237	709,6758423	0,148523003	709,6853027	0,367215693	709,6862793	0,318403631	709,6862793	0,281681627	709,6862793	0,366435647	709,6853027	0,184560865	709,6758423	0,242563918	709,6758423	0,140165284	709,6758423	0,18283999
709,7111816	0,112603851	709,7102051	0,200988442	709,7007446	0,109686211	709,7007446	0,083003722	709,7102051	0,2859478	709,7111816	0,222258151	709,7111816	0,176612779	709,7111816	0,245737225	709,7102051	0,161631599	709,7007446	0,149180263	709,7007446	0,080095612	709,7007446	0,104525454
709,736084	0,139123306	709,7351074	0,199655294	709,725647	0,111771658	709,725647	0,090383425	709,7351074	0,239111811	709,736084	0,200321868	709,736084	0,184961736	709,736084	0,219962865	709,7351074	0,167343661	709,725647	0,128818408	709,725647	0,07458277	709,725647	0,09912134
709,7609863	0,128251538	709,7600098	0,11838305	709,7506104	0,104016595	709,7506104	0,101053953	709,7600098	0,152429685	709,7609863	0,149918035	709,7609863	0,163124934	709,7609863	0,171083122	709,7600098	0,095754944	709,7506104	0,122577831	709,7506104	0,095122218	709,7506104	0,111133151
709,7858887	0,076762758	709,7849731	0,101125732	709,7755127	0,059175879	709,7755127	0,048717827	709,7849731	0,125494197	709,7858887	0,103733271	709,7858887	0,102154635	709,7858887	0,116102315	709,7849731	0,084927768	709,7755127	0,074143074	709,7755127	0,050255157	709,7755127	0,058969479
709,810791	0,097420849	709,8098755	0,132785842	709,800415	0,061670791	709,800415	0,053232342	709,8098755	0,139124036	709,810791	0,121967159	709,810791	0,117873326	709,810791	0,127421752	709,8098755	0,120891072	709,800415	0,068904161	709,800415	0,048010718	709,800415	0,053995062
709,8356934	0,092740551	709,8347778	0,090394042	709,8253174	0,072099775	709,8253174	0,08571513	709,8347778	0,090478972	709,8356934	0,093870662	709,8356934	0,114568278	709,8356934	0,10970936	709,8347778	0,078164548	709,8253174	0,082890667	709,8253174	0,082946882	709,8253174	0,078645542
709,8605957	0,058375716	709,8596802	0,070239447	709,8502197	0,04574066	709,8502197	0,046330277	709,8596802	0,075775005	709,8605957	0,059584808	709,8605957	0,063031137	709,8605957	0,068286926	709,8596802	0,067659691	709,8502197	0,049783282	709,8502197	0,053390358	709,8502197	0,048821952
709,885498	0,082746245	709,8845825	0,121191509	709,8751221	0,045620997	709,8751221	0,047058906	709,8845825	0,108871892	709,885498	0,082514159	709,885498	0,086136922	709,885498	0,090084136	709,8845825	0,117719479	709,8751221	0,043487083	709,8751221	0,042339485	709,8751221	0,038238693
709,9104004	0,108756639	709,9094849	0,095091589	709,9000244	0,069123693	709,9000244	0,095531106	709,9094849	0,085018083	709,9104004	0,073985636	709,9104004	0,097130351	709,9104004	0,090817682	709,9094849	0,098950721	709,9000244	0,068349689	709,9000244	0,089003466	709,9000244	0,07521496
709,9353027	0,090504862	709,9343872	0,077212051	709,9249268	0,053251222	709,9249268	0,083827488	709,9343872	0,069254756	709,9353027	0,056412913	709,9353027	0,084323563	709,9353027	0,073273569	709,9343872	0,081965543	709,9249268	0,051519953	709,9249268	0,081963331	709,9249268	0,059359591
709,9602051	0,095968165	709,9592896	0,136644587	709,9498291	0,054285668	709,9498291	0,094156757	709,9592896	0,108824208	709,9602051	0,057474382	709,9602051	0,071063094	709,9602051	0,068635195	709,9592896	0,153861716	709,9498291	0,044739794	709,9498291	0,074319251	709,9498291	0,050112214
709,9851074	0,178820148	709,9841919	0,152498722	709,9747314	0,092343308	709,9747314	0,171236306	709,9841919	0,111962706	709,9851074	0,096541777	709,9851074	0,120455012	709,9851074	0,113890924	709,9841919	0,186393514	709,9747314	0,078867853	709,9747314	0,135868892	709,9747314	0,097479962
710,0100098	0,275515854	710,0090942	0,116664946	709,9996338	0,094667308	709,9996338	0,223601773	710,0090942	0,077943698	710,0100098	0,086603947	710,0100098	0,138905823	710,0100098	0,105658539	710,0090942	0,184408784	709,9996338	0,085834287	709,9996338	0,173342675	709,9996338	0,113196947
710,0349121	0,431865484	710,0339966	0,176975161	710,0245361	0,094438456	710,0245361	0,264719427	710,0339966	0,110852331	710,0349121	0,091897294	710,0349121	0,16732876	710,0349121	0,105872959	710,0339966	0,296125203	710,0245361	0,0697923	710,0245361	0,182609096	710,0245361	0,101307839
710,0598145	0,714879572	710,0588989	0,264610112	710,0494385	0,159851521	710,0494385	0,374064416	710,0588989	0,163938746	710,0598145	0,168636858	710,0598145	0,339585513	710,0598145	0,187649116	710,0588989	0,424583316	710,0494385	0,112491272	710,0494385	0,256934971	710,0494385	0,159859434
710,0847168	0,883390784	710,0838013	0,250009805	710,0743408	0,21694617	710,0743408	0,446948797	710,0838013	0,155977264	710,0847168	0,2332526	710,0847168	0,508517444	710,0847168	0,271100789	710,0838013	0,396168917	710,0743408	0,167604834	710,0743408	0,318954736	710,0743408	0,239978611
710,1096191	0,80061537	710,1087036	0,253769577	710,0992432	0,216007441	710,0992432	0,35756883	710,1087036	0,195743114	710,1096191	0,327148288	710,1096191	0,62685138	710,1096191	0,343405783	710,1087036	0,365545362	710,0992432	0,173516646	710,0992432	0,258747607	710,0992432	0,226975024
710,1345215	0,692064166	710,133606	0,272148728	710,1241455	0,223795921	710,1241455	0,311421126	710,133606	0,232509062	710,1345215	0,46604982	710,1345215	0,735228837	710,1345215	0,449874461	710,133606	0,386941195	710,1241455	0,208413154	710,1241455	0,220649555	710,1241455	0,223485395
710,1594238	0,589465261	710,1585083	0,209141523	710,1490479	0,22259748	710,1490479	0,315061092	710,1585083	0,178915948	710,1594238	0,486038983	710,1594238	0,69115597	710,1594238	0,450202286	710,1585083	0,322818428	710,1490479	0,232441381	710,1490479	0,247349918	710,1490479	0,238887519
710,1843262	0,464901984	710,1834106	0,185115308	710,1739502	0,166787654	710,1739502	0,222939178	710,1834106	0,150633126	710,1843262	0,421543598	710,1843262	0,553641677	710,1843262	0,36911276	710,1834106	0,28034243	710,1739502	0,180774078	710,1739502	0,191684484	710,1739502	0,179791838
710,2092285	0,411489427	710,208313	0,224442959	710,1988525	0,151000023	710,1988525	0,173501521	710,208313	0,177593455	710,2092285	0,389559329	710,2092285	0,521677196	710,2092285	0,354014993	710,208313	0,29000169	710,1988525	0,159064472	710,1988525	0,140482679	710,1988525	0,14924258
710,2341309	0,339157015	710,2332153	0,169238344	710,2237549	0,156181037	710,2237549	0,187753916	710,2332153	0,13919808	710,2341309	0,333570868	710,2341309	0,466008902	710,2341309	0,313191503	710,2332153	0,215185076	710,2237549	0,172975928	710,2237549	0,161116242	710,2237549	0,168293655
710,2590332	0,236953095	710,2581177	0,125562876	710,2486572	0,115635142	710,2486572	0,139258534	710,2581177	0,113128796	710,2590332	0,243443236	710,2590332	0,352839291	710,2590332	0,23148948	710,2581177	0,160470098	710,2486572	0,130034626	710,2486572	0,126322538	710,2486572	0,123106912
710,2839355	0,244507566	710,28302	0,175496966	710,2735596	0,097402096	710,2735596	0,120929696	710,28302	0,139595985	710,2839355	0,23609972	710,2839355	0,312615722	710,2839355	0,222607866	710,28302	0,21933122	710,2735596	0,10316135	710,2735596	0,092933983	710,2735596	0,092422366
710,3088379	0,262881398	710,3079224	0,182282567	710,2984619	0,12172126	710,2984619	0,178754061	710,3079224	0,12802425	710,3088379	0,212923661	710,3088379	0,285132796	710,3088379	0,209429875	710,3079224	0,251454175	710,2984619	0,126034215	710,2984619	0,154478848	710,2984619	0,134012461
710,3338013	0,249838248	710,3328247	0,213530496	710,3233643	0,122640356	710,3233643	0,206002116	710,3328247	0,12218184	710,3338013	0,147845522	710,3338013	0,215182781	710,3338013	0,157633007	710,3328247	0,369227111	710,3233643	0,115563706	710,3233643	0,184544563	710,3233643	0,130973294
710,3587036	0,40031603	710,3577271	0,447600573	710,3483276	0,148425981	710,3483276	0,29765901	710,3577271	0,226244643	710,3587036	0,178985551	710,3587036	0,251550645	710,3587036	0,195132926	710,3577271	0,75399375	710,3483276	0,111178122	710,3483276	0,247079507	710,3483276	0,143270999
710,383606	0,729243577	710,3826294	0,792348981	710,37323	0,271632224	710,37323	0,582037032	710,3826294	0,379668921	710,383606	0,223513842	710,383606	0,389314681	710,383606	0,283356518	710,3826294	1,249434233	710,37323	0,18774128	710,37323	0,476208925	710,37323	0,280081004
710,4085083	1,029045939	710,4075317	1,204114914	710,3981323	0,439469606	710,3981323	0,865770876	710,4075317	0,612827003	710,4085083	0,278389931	710,4085083	0,573862553	710,4085083	0,410885602	710,4075317	1,748380303	710,3981323	0,291820228	710,3981323	0,737750232	710,3981323	0,456427157
710,4334106	1,22294879	710,4324341	1,718416333	710,4230347	0,665612817	710,4230347	1,11109972	710,4324341	1,023296714	710,4334106	0,410132647	710,4334106	0,819121659	710,4334106	0,633072615	710,4324341	2,288616657	710,4230347	0,453086108	710,4230347	0,982011974	710,4230347	0,67209065
710,458313	1,445992112	710,4573364	2,105937004	710,447937	0,986664176	710,447937	1,457410574	710,4573364	1,430806279	710,458313	0,617658973	710,458313	1,153471351	710,458313	0,943300068	710,4573364	2,646626234	710,447937	0,745643675	710,447937	1,338344216	710,447937	0,990037918
710,4832153	1,697957277	710,4822998	2,222706795	710,4728394	1,230462432	710,4728394	1,637417436	710,4822998	1,665399551	710,4832153	0,898280263	710,4832153	1,538076401	710,4832153	1,342075944	710,4822998	2,671661854	710,4728394	0,992430747	710,4728394	1,544997573	710,4728394	1,241729259
710,5081177	1,648463607	710,5072021	2,222353935	710,4977417	1,405664444	710,4977417	1,534641504	710,5072021	1,862668276	710,5081177	1,115252972	710,5081177	1,847103715	710,5081177	1,673347354	710,5072021	2,472914457	710,4977417	1,212313056	710,4977417	1,451568007	710,4977417	1,388136029
710,53302	1,357688069	710,5321045	2,042936563	710,522644	1,517120004	710,522644	1,188859463	710,5321045	1,97744894	710,53302	1,328303337	710,53302	2,093972921	710,53302	1,948413253	710,5321045	1,998602629	710,522644	1,483035922	710,522644	1,125466228	710,522644	1,44129324
710,5579224	0,958488107	710,5570068	1,59047544	710,5475464	1,323754907	710,5475464	0,830984235	710,5570068	1,793302298	710,5579224	1,391424298	710,5579224	1,967422128	710,5579224	1,971490264	710,5570068	1,382543921	710,5475464	1,561258197	710,5475464	0,789397299	710,5475464	1,268454909
710,5828247	0,56991744	710,5819092	1,106326938	710,5724487	0,93489176	710,5724487	0,487840801	710,5819092	1,447857022	710,5828247	1,23177433	710,5828247	1,486001372	710,5828247	1,669304371	710,5819092	0,879066885	710,5724487	1,285031557	710,5724487	0,480463922	710,5724487	0,879160225
710,6077271	0,38563776	710,6068115	0,799833477	710,5973511	0,598616838	710,5973511	0,283884674	710,6068115	1,125219822	710,6077271	1,018282175	710,6077271	1,068893909	710,6077271	1,306791782	710,6068115	0,621562064	710,5973511	0,91058147	710,5973511	0,268683881	710,5973511	0,551227272
710,6326294	0,303575695	710,6317139	0,536486208	710,6222534	0,400769442	710,6222534	0,236281186	710,6317139	0,791956246	710,6326294	0,757121503	710,6326294	0,744030833	710,6326294	0,937658072	710,6317139	0,417113096	710,6222534	0,63220048	710,6222534	0,217962161	710,6222534	0,384080648
710,6575317	0,214424536	710,6566162	0,342949867	710,6471558	0,254740179	710,6471558	0,175422594	710,6566162	0,530140817	710,6575317	0,487879008	710,6575317	0,468956798	710,6575317	0,610450029	710,6566162	0,270091653	710,6471558	0,402199686	710,6471558	0,172436073	710,6471558	0,248606399
710,6824341	0,212637886	710,6815186	0,297440797	710,6720581	0,170122385	710,6720581	0,125536993	710,6815186	0,411216587	710,6824341	0,368494362	710,6824341	0,357582808	710,6824341	0,456806958	710,6815186	0,263031423	710,6720581	0,249517024	710,6720581	0,107434019	710,6720581	0,150567681
710,7073364	0,226597607	710,7064209	0,24202323	710,6969604	0,157333806	710,6969604	0,148156375	710,7064209	0,303825915	710,7073364	0,295412511	710,7073364	0,319556355	710,7073364	0,35654065	710,7064209	0,219582319	710,6969604	0,207429722	710,6969604	0,121600255	710,6969604	0,157183453
710,7322388	0,149309024	710,7313232	0,150165439	710,7218628	0,12653859	710,7218628	0,115598112	710,7313232	0,208317712	710,7322388	0,197622225	710,7322388	0,234655678	710,7322388	0,242296636	710,7313232	0,136146098	710,7218628	0,167277053	710,7218628	0,111578874	710,7218628	0,137556911
710,7571411	0,120359264	710,7562256	0,162543684	710,7467651	0,085707277	710,7467651	0,064190499	710,7562256	0,197449371	710,7571411	0,172512263	710,7571411	0,183576733	710,7571411	0,203833535	710,7562256	0,152304754	710,7467651	0,111598492	710,7467651	0,059776675	710,7467651	0,078400426
710,7820435	0,132002339	710,7811279	0,152783841	710,7716675	0,095562376	710,7716675	0,086027138	710,7811279	0,164498299	710,7820435	0,17263101	710,7820435	0,185712636	710,7820435	0,194543093	710,7811279	0,142077535	710,7716675	0,1172987	710,7716675	0,079029292	710,7716675	0,093602613
710,8069458	0,078021243	710,8060303	0,096475504	710,7965698	0,08115492	710,7965698	0,079376891	710,8060303	0,108261369	710,8069458	0,101334311	710,8069458	0,121059954	710,8069458	0,129893467	710,8060303	0,087719657	710,7965698	0,098328277	710,7965698	0,088535599	710,7965698	0,089279667
710,8318481	0,060709506	710,8309326	0,118202329	710,8214722	0,051910792	710,8214722	0,044815656	710,8309326	0,123380296	710,8318481	0,093151353	710,8318481	0,086723745	710,8318481	0,103444196	710,8309326	0,122102074	710,8214722	0,063134715	710,8214722	0,050786261	710,8214722	0,047319669
710,8567505	0,094437599	710,855835	0,141844139	710,8463745	0,071541034	710,8463745	0,079425804	710,855835	0,129395872	710,8567505	0,103956513	710,8567505	0,118763275	710,8567505	0,121144764	710,855835	0,151266903	710,8463745	0,077330604	710,8463745	0,070976257	710,8463745	0,069472253
710,8816528	0,081559077	710,8807373	0,102786817	710,8712769	0,076507792	710,8712769	0,096558169	710,8807373	0,095013835	710,8816528	0,073846094	710,8816528	0,089437284	710,8816528	0,085529834	710,8807373	0,106347211	710,8712769	0,077925004	710,8712769	0,100993529	710,8712769	0,08129254
710,9065552	0,06564644	710,9056396	0,136167333	710,8961792	0,05918406	710,8961792	0,065243617	710,9056396	0,123008221	710,9065552	0,061450809	710,9065552	0,069742613	710,9065552	0,06950587	710,9056396	0,136093408	710,8961792	0,05639286	710,8961792	0,070262514	710,8961792	0,054862913
710,9314575	0,10550306	710,930542	0,164123654	710,9210815	0,089570314	710,9210815	0,096891984	710,930542	0,147081971	710,9314575	0,094345964	710,9314575	0,108327925	710,9314575	0,111298278	710,930542	0,154979229	710,9210815	0,080482841	710,9210815	0,087893203	710,9210815	0,082567073
710,9563599	0,119051963	710,9554443	0,103255928	710,9460449	0,09098161	710,9460449	0,124445915	710,9554443	0,101900473	710,9563599	0,085481457	710,9563599	0,113791496	710,9563599	0,10488113	710,9554443	0,103040762	710,9460449	0,095070966	710,9460449	0,114899881	710,9460449	0,105716184
710,9812622	0,097406492	710,9803467	0,111259259	710,9709473	0,071553469	710,9709473	0,107908115	710,9803467	0,107719779	710,9812622	0,054806229	710,9812622	0,079589374	710,9812622	0,078098044	710,9803467	0,127134502	710,9709473	0,075609013	710,9709473	0,096068434	710,9709473	0,07804095
711,0061646	0,156888008	711,005249	0,1458572	710,9958496	0,066298783	710,9958496	0,120713525	711,005249	0,12067876	711,0061646	0,080784805	711,0061646	0,102057993	711,0061646	0,09702719	711,005249	0,182273686	710,9958496	0,064508289	710,9958496	0,090348229	710,9958496	0,06302429
711,0310669	0,298638523	711,0301514	0,160265639	711,020752	0,108582757	711,020752	0,216644779	711,0301514	0,120202988	711,0310669	0,102697462	711,0310669	0,16152139	711,0310669	0,12405403	711,0301514	0,232229605	711,020752	0,094827406	711,020752	0,159150645	711,020752	0,115614623
711,0560303	0,423229098	711,0550537	0,146438092	711,0456543	0,127843887	711,0456543	0,286151797	711,0550537	0,099083483	711,0560303	0,085385732	711,0560303	0,202876627	711,0560303	0,112999961	711,0550537	0,253226697	711,0456543	0,10740453	711,0456543	0,217186719	711,0456543	0,142792165
711,0809326	0,576957524	711,0799561	0,214074969	711,0705566	0,14535743	711,0705566	0,310539186	711,0799561	0,151743904	711,0809326	0,152433127	711,0809326	0,305342823	711,0809326	0,168986261	711,0799561	0,342947632	711,0705566	0,109288119	711,0705566	0,216290697	711,0705566	0,138148487
711,105835	0,671608925	711,1048584	0,237907663	711,095459	0,210012048	711,095459	0,363486439	711,1048584	0,170197338	711,105835	0,251370847	711,105835	0,47627604	711,105835	0,269425899	711,1048584	0,343066603	711,095459	0,170182005	711,095459	0,257680804	711,095459	0,211735994
711,1307373	0,567333996	711,1297607	0,171212658	711,1203613	0,218347445	711,1203613	0,328663796	711,1297607	0,141776279	711,1307373	0,291407526	711,1307373	0,52524972	711,1307373	0,2989932	711,1297607	0,256496102	711,1203613	0,201722682	711,1203613	0,249871418	711,1203613	0,234655961
711,1556396	0,449103445	711,1546631	0,184091821	711,1452637	0,18546094	711,1452637	0,235225797	711,1546631	0,164400429	711,1556396	0,338893831	711,1556396	0,506674588	711,1556396	0,316856086	711,1546631	0,258168221	711,1452637	0,190414071	711,1452637	0,171425089	711,1452637	0,183957681
711,180542	0,425177217	711,1796265	0,184405148	711,170166	0,191328421	711,170166	0,22157453	711,1796265	0,158721656	711,180542	0,386897057	711,180542	0,494618982	711,180542	0,33321175	711,1796265	0,243501604	711,170166	0,203505337	711,170166	0,157793403	711,170166	0,191363111
711,2054443	0,325490206	711,2045288	0,12396083	711,1950684	0,159654453	711,1950684	0,183237642	711,2045288	0,107449152	711,2054443	0,309310824	711,2054443	0,409252167	711,2054443	0,27045691	711,2045288	0,15187034	711,1950684	0,188767925	711,1950684	0,157370389	711,1950684	0,176054791
711,2303467	0,236192688	711,2294312	0,130794451	711,2199707	0,103996277	711,2199707	0,114972696	711,2294312	0,118548378	711,2303467	0,25685975	711,2303467	0,322747201	711,2303467	0,217964143	711,2294312	0,155700609	711,2199707	0,131546646	711,2199707	0,091521382	711,2199707	0,10766691
711,255249	0,234795839	711,2543335	0,14928627	711,244873	0,113741048	711,244873	0,130322427	711,2543335	0,123949967	711,255249	0,257162929	711,255249	0,321230382	711,255249	0,225141674	711,2543335	0,173322976	711,244873	0,128544018	711,244873	0,099744678	711,244873	0,112687245
711,2801514	0,191686764	711,2792358	0,100655854	711,2697754	0,112897314	711,2697754	0,154425189	711,2792358	0,082839005	711,2801514	0,191709623	711,2801514	0,250106096	711,2801514	0,179685399	711,2792358	0,124666467	711,2697754	0,123489194	711,2697754	0,130865663	711,2697754	0,125489905
711,3050537	0,147500128	711,3041382	0,134106502	711,2946777	0,086840838	711,2946777	0,121646389	711,3041382	0,100782216	711,3050537	0,141022027	711,3050537	0,178857073	711,3050537	0,13773708	711,3041382	0,183173835	711,2946777	0,083996259	711,2946777	0,107195467	711,2946777	0,086740524
711,3299561	0,226304948	711,3290405	0,222211272	711,3195801	0,120137319	711,3195801	0,184206799	711,3290405	0,14218387	711,3299561	0,166792929	711,3299561	0,204130769	711,3299561	0,159960493	711,3290405	0,324514389	711,3195801	0,105735011	711,3195801	0,152171925	711,3195801	0,114495777
711,3548584	0,296090126	711,3539429	0,292686731	711,3444824	0,168998331	711,3444824	0,291943014	711,3539429	0,144207925	711,3548584	0,150912926	711,3548584	0,216350287	711,3548584	0,166372806	711,3539429	0,45110324	711,3444824	0,139319941	711,3444824	0,250909209	711,3444824	0,178120688
711,3797607	0,391020626	711,3788452	0,491531402	711,3693848	0,198018715	711,3693848	0,372434705	711,3788452	0,246100888	711,3797607	0,13997823	711,3797607	0,233555257	711,3797607	0,17456013	711,3788452	0,725764394	711,3693848	0,146059781	711,3693848	0,325455278	711,3693848	0,201069131
711,4046631	0,594065905	711,4037476	0,797354758	711,3942871	0,318457544	711,3942871	0,541103303	711,4037476	0,44073984	711,4046631	0,220497265	711,4046631	0,370707452	711,4046631	0,296558231	711,4037476	1,068502188	711,3942871	0,22905384	711,3942871	0,461241245	711,3942871	0,31223917
711,4295654	0,723777711	711,4286499	1,010227084	711,4191895	0,475607783	711,4191895	0,71108526	711,4286499	0,611644506	711,4295654	0,285999119	711,4295654	0,512505352	711,4295654	0,41419822	711,4286499	1,245449066	711,4191895	0,36700958	711,4191895	0,627336502	711,4191895	0,492204815
711,4544678	0,727975547	711,4535522	1,180169106	711,4440918	0,582487941	711,4440918	0,760295033	711,4535522	0,835529745	711,4544678	0,327824414	711,4544678	0,597027123	711,4544678	0,515241444	711,4535522	1,374295712	711,4440918	0,47675544	711,4440918	0,691762626	711,4440918	0,583648682
711,4793701	0,787980974	711,4784546	1,310943484	711,4689941	0,66421622	711,4689941	0,79304719	711,4784546	1,020363569	711,4793701	0,462616891	711,4793701	0,737364769	711,4793701	0,701256216	711,4784546	1,441595912	711,4689941	0,573228955	711,4689941	0,71116364	711,4689941	0,647828698
711,5042725	0,847728014	711,5033569	1,293533802	711,4938965	0,750380456	711,4938965	0,794631839	711,5033569	1,105656028	711,5042725	0,614282072	711,5042725	0,942902446	711,5042725	0,906763077	711,5033569	1,327358842	711,4938965	0,694651306	711,4938965	0,709701359	711,4938965	0,737153709
711,5291748	0,68911922	711,5282593	1,098246336	711,5187988	0,762674987	711,5187988	0,633790135	711,5282593	1,091912985	711,5291748	0,66400373	711,5291748	1,004446626	711,5291748	0,988327444	711,5282593	0,998195887	711,5187988	0,791767359	711,5187988	0,582336605	711,5187988	0,757863581
711,5540771	0,460111201	711,5531616	0,889473438	711,5437622	0,625869453	711,5437622	0,387948602	711,5531616	1,028324962	711,5540771	0,683518112	711,5540771	0,927452862	711,5540771	0,985810757	711,5531616	0,731804073	711,5437622	0,757166624	711,5437622	0,360848427	711,5437622	0,596669734
711,5789795	0,356767893	711,578064	0,679447472	711,5686646	0,480727524	711,5686646	0,270251662	711,578064	0,867490053	711,5789795	0,679200232	711,5789795	0,784151316	711,5789795	0,908605218	711,578064	0,522704065	711,5686646	0,660158038	711,5686646	0,247832388	711,5686646	0,45476231
711,6038818	0,232825756	711,6029663	0,426058859	711,5935669	0,329075694	711,5935669	0,205080539	711,6029663	0,616635859	711,6038818	0,534476459	711,6038818	0,563610911	711,6038818	0,701122642	711,6029663	0,300480545	711,5935669	0,497171879	711,5935669	0,194126248	711,5935669	0,330943555
711,6287842	0,148199812	711,6278687	0,306488007	711,6184692	0,189852729	711,6184692	0,114352807	711,6278687	0,460554272	711,6287842	0,37543872	711,6287842	0,352851659	711,6287842	0,473785967	711,6278687	0,224392772	711,6184692	0,310317248	711,6184692	0,102102906	711,6184692	0,182637766
711,6536865	0,163076341	711,652771	0,265044749	711,6433716	0,147222325	711,6433716	0,115453131	711,652771	0,357541889	711,6536865	0,309065104	711,6536865	0,287524164	711,6536865	0,370330244	711,652771	0,216630653	711,6433716	0,22311148	711,6433716	0,093630657	711,6433716	0,139989719
711,6785889	0,161081672	711,6776733	0,157104984	711,6682739	0,130197689	711,6682739	0,138046488	711,6776733	0,226935968	711,6785889	0,216789395	711,6785889	0,221242756	711,6785889	0,265107006	711,6776733	0,132190406	711,6682739	0,180935815	711,6682739	0,122179188	711,6682739	0,139835939
711,7034912	0,103316665	711,7025757	0,133298725	711,6931763	0,082551561	711,6931763	0,080600537	711,7025757	0,181619585	711,7034912	0,138053328	711,7034912	0,149810314	711,7034912	0,181706145	711,7025757	0,115075782	711,6931763	0,112261429	711,6931763	0,072084926	711,6931763	0,085496202
711,7283936	0,124118388	711,727478	0,16014488	711,7180786	0,084579952	711,7180786	0,080613151	711,727478	0,180037737	711,7283936	0,147976577	711,7283936	0,168353289	711,7283936	0,178595811	711,727478	0,147876427	711,7180786	0,101716504	711,7180786	0,062960766	711,7180786	0,078775361
711,7532959	0,112831116	711,7523804	0,107667878	711,742981	0,094605915	711,742981	0,102879018	711,7523804	0,12144614	711,7532959	0,124465741	711,7532959	0,154678762	711,7532959	0,152640894	711,7523804	0,092797801	711,742981	0,116144165	711,742981	0,093803585	711,742981	0,105771273
711,7781982	0,065803543	711,7772827	0,085256815	711,7678833	0,059535481	711,7678833	0,05566093	711,7772827	0,103856198	711,7781982	0,084559664	711,7781982	0,091652311	711,7781982	0,100860499	711,7772827	0,078476653	711,7678833	0,073479533	711,7678833	0,058895428	711,7678833	0,061769314
711,8031616	0,085212149	711,8021851	0,129732192	711,7927856	0,053313486	711,7927856	0,048649289	711,8021851	0,1326451	711,8031616	0,10452643	711,8031616	0,100288644	711,8031616	0,109934315	711,8021851	0,127351657	711,7927856	0,060811616	711,7927856	0,042305972	711,7927856	0,047318142
711,828064	0,092232831	711,8270874	0,11031761	711,817688	0,076653592	711,817688	0,085518338	711,8270874	0,104688764	711,828064	0,093022354	711,828064	0,109589249	711,828064	0,104368396	711,8270874	0,104693741	711,817688	0,082459889	711,817688	0,080166519	711,817688	0,086177014
711,8529663	0,057047538	711,8520508	0,090303637	711,8425903	0,055830792	711,8425903	0,062828004	711,8520508	0,091750048	711,8529663	0,055500995	711,8529663	0,062684461	711,8529663	0,067665823	711,8520508	0,088232338	711,8425903	0,060607485	711,8425903	0,06931895	711,8425903	0,063847058
711,8778687	0,082209431	711,8769531	0,151921645	711,8674927	0,05296921	711,8674927	0,057430994	711,8769531	0,13642852	711,8778687	0,080082089	711,8778687	0,083018743	711,8778687	0,089887217	711,8769531	0,14425306	711,8674927	0,0508219	711,8674927	0,04858385	711,8674927	0,048958395
711,902771	0,112227134	711,9018555	0,137266174	711,892395	0,082630239	711,892395	0,104713961	711,9018555	0,129136696	711,902771	0,091909103	711,902771	0,11569567	711,902771	0,106439807	711,9018555	0,127263457	711,892395	0,08187893	711,892395	0,096051909	711,892395	0,08848571
711,9276733	0,08999259	711,9267578	0,096402049	711,9172974	0,069851786	711,9172974	0,095096216	711,9267578	0,104577795	711,9276733	0,073414393	711,9276733	0,089480005	711,9276733	0,088245533	711,9267578	0,088241093	711,9172974	0,072808161	711,9172974	0,088724136	711,9172974	0,082400247
711,9525757	0,070956945	711,9516602	0,126565889	711,9421997	0,056625698	711,9421997	0,070109516	711,9516602	0,1316275	711,9525757	0,059502918	711,9525757	0,059126344	711,9525757	0,071525998	711,9516602	0,129186749	711,9421997	0,054182123	711,9421997	0,061658438	711,9421997	0,051255148
711,977478	0,132077545	711,9765625	0,141098917	711,9671021	0,079897635	711,9671021	0,106606521	711,9765625	0,136994973	711,977478	0,091882028	711,977478	0,105928436	711,977478	0,101408854	711,9765625	0,158217683	711,9671021	0,072482891	711,9671021	0,085673071	711,9671021	0,081691623
712,0023804	0,174131304	712,0014648	0,097679332	711,9920044	0,096463196	711,9920044	0,166034788	712,0014648	0,088223517	712,0023804	0,083106376	712,0023804	0,111684687	712,0023804	0,098412618	712,0014648	0,133093402	711,9920044	0,094307423	711,9920044	0,134437948	711,9920044	0,120260805
712,0272827	0,232496098	712,0263672	0,112347193	712,0169067	0,074979588	712,0169067	0,164162546	712,0263672	0,093825236	712,0272827	0,074446656	712,0272827	0,103925876	712,0272827	0,079882279	712,0263672	0,192435592	712,0169067	0,067882203	712,0169067	0,121670052	712,0169067	0,084441267
712,0521851	0,44438985	712,0512695	0,191026852	712,0418091	0,100571401	712,0418091	0,240743756	712,0512695	0,128224969	712,0521851	0,120461635	712,0521851	0,194441646	712,0521851	0,126404777	712,0512695	0,335806429	712,0418091	0,084545985	712,0418091	0,165857911	712,0418091	0,100884058
712,0770874	0,646334112	712,0761719	0,186142415	712,0667114	0,153010681	712,0667114	0,352922022	712,0761719	0,111957416	712,0770874	0,15318267	712,0770874	0,308436304	712,0770874	0,160803705	712,0761719	0,361398578	712,0667114	0,126785368	712,0667114	0,259668052	712,0667114	0,171170235
712,1019897	0,707245827	712,1010742	0,189250976	712,0916138	0,159061968	712,0916138	0,337990522	712,1010742	0,123013139	712,1019897	0,189890981	712,1019897	0,40315935	712,1019897	0,190239012	712,1010742	0,351453245	712,0916138	0,123289481	712,0916138	0,242637604	712,0916138	0,175085962
712,1268921	0,67449373	712,1259766	0,23530212	712,1165161	0,183186829	712,1165161	0,294202447	712,1259766	0,174784318	712,1268921	0,309031785	712,1268921	0,544424534	712,1268921	0,28664574	712,1259766	0,365724534	712,1165161	0,15407446	712,1165161	0,201692283	712,1165161	0,185896561
712,1517944	0,564687967	712,1508789	0,178036809	712,1414795	0,205573246	712,1414795	0,280833423	712,1508789	0,148504749	712,1517944	0,379306823	712,1517944	0,578789294	712,1517944	0,330865741	712,1508789	0,266578645	712,1414795	0,202100962	712,1414795	0,209597036	712,1414795	0,222035959
712,1766968	0,404643774	712,1757813	0,126394928	712,1663818	0,154380515	712,1663818	0,196807042	712,1757813	0,121649683	712,1766968	0,355695784	712,1766968	0,477798402	712,1766968	0,283763349	712,1757813	0,192124367	712,1663818	0,177075997	712,1663818	0,150964469	712,1663818	0,171236768
712,2015991	0,352721304	712,2006836	0,159148276	712,1912842	0,119394794	712,1912842	0,138126627	712,2006836	0,139923841	712,2015991	0,34981367	712,2015991	0,421414912	712,2015991	0,278771728	712,2006836	0,217661783	712,1912842	0,143887982	712,1912842	0,102786109	712,1912842	0,121057913
712,2265015	0,329107195	712,2255859	0,134710073	712,2161865	0,130357668	712,2161865	0,16747807	712,2255859	0,110862307	712,2265015	0,31074962	712,2265015	0,392174542	712,2265015	0,257484555	712,2255859	0,183986381	712,2161865	0,151536494	712,2161865	0,139018118	712,2161865	0,138795242
712,2514038	0,263429582	712,2504883	0,098843023	712,2410889	0,103399977	712,2410889	0,159090623	712,2504883	0,079330049	712,2514038	0,22736226	712,2514038	0,2990008	712,2514038	0,190374687	712,2504883	0,157840535	712,2410889	0,119553208	712,2410889	0,136148468	712,2410889	0,115800105
712,2763062	0,301335633	712,2753906	0,153341517	712,2659912	0,089541823	712,2659912	0,15557228	712,2753906	0,112490349	712,2763062	0,225058421	712,2763062	0,288308859	712,2763062	0,193995118	712,2753906	0,240988657	712,2659912	0,090428673	712,2659912	0,11392729	712,2659912	0,091053389
712,3012085	0,370852083	712,300293	0,18156673	712,2908936	0,132920891	712,2908936	0,230963185	712,300293	0,119144537	712,3012085	0,227128878	712,3012085	0,31543684	712,3012085	0,214304537	712,300293	0,290347695	712,2908936	0,119562432	712,2908936	0,169828281	712,2908936	0,144616649
712,3261108	0,338381648	712,3251953	0,191606477	712,3157959	0,149970576	712,3157959	0,259412825	712,3251953	0,108993091	712,3261108	0,189168558	712,3261108	0,284527928	712,3261108	0,186315134	712,3251953	0,330493093	712,3157959	0,129963219	712,3157959	0,209724039	712,3157959	0,167985544
712,3510132	0,363646775	712,3500977	0,334317505	712,3406982	0,168709606	712,3406982	0,277197808	712,3500977	0,188056126	712,3510132	0,222152874	712,3510132	0,309218287	712,3510132	0,226264626	712,3500977	0,510116935	712,3406982	0,12882641	712,3406982	0,226845518	712,3406982	0,164677888
712,3759155	0,450205296	712,375	0,488636464	712,3656006	0,249563336	712,3656006	0,406494766	712,375	0,274119198	712,3759155	0,255614847	712,3759155	0,377586633	712,3759155	0,281150788	712,375	0,688596308	712,3656006	0,192009166	712,3656006	0,344918728	712,3656006	0,251749843
712,4008179	0,480842829	712,3999023	0,608058572	712,3905029	0,319818854	712,3905029	0,497470528	712,3999023	0,354488432	712,4008179	0,261832654	712,4008179	0,392909139	712,4008179	0,311276346	712,3999023	0,778078854	712,3905029	0,251281708	712,3905029	0,435654134	712,3905029	0,333923042
712,4257202	0,486731887	712,4248047	0,737638474	712,4154053	0,379374802	712,4154053	0,49511072	712,4248047	0,472926617	712,4257202	0,271614999	712,4257202	0,42085436	712,4257202	0,345933646	712,4248047	0,872874141	712,4154053	0,305584103	712,4154053	0,426364839	712,4154053	0,375276178
712,4506226	0,5318169	712,449707	0,87162292	712,4403076	0,445786625	712,4403076	0,513664603	712,449707	0,614512444	712,4506226	0,362898946	712,4506226	0,523939073	712,4506226	0,478209466	712,449707	0,963168144	712,4403076	0,380902112	712,4403076	0,433912903	712,4403076	0,438139945
712,4755249	0,53143841	712,4746094	0,913605511	712,46521	0,495133698	712,46521	0,545208335	712,4746094	0,705215156	712,4755249	0,424547315	712,4755249	0,597964704	712,4755249	0,574723423	712,4746094	0,951760054	712,46521	0,462052286	712,46521	0,489001721	712,46521	0,498724163
712,5004272	0,479051322	712,4995117	0,913661838	712,4901123	0,486122131	712,4901123	0,497609317	712,4995117	0,756039321	712,5004272	0,4378829	712,5004272	0,574261487	712,5004272	0,599213302	712,4995117	0,888665795	712,4901123	0,482855558	712,4901123	0,454587668	712,4901123	0,487002879
712,5253296	0,480058491	712,5244141	0,919113636	712,5150146	0,486418039	712,5150146	0,427230656	712,5244141	0,836718321	712,5253296	0,498506546	712,5253296	0,599600017	712,5253296	0,661602795	712,5244141	0,829190731	712,5150146	0,488835603	712,5150146	0,371182084	712,5150146	0,462089062
712,550293	0,419964731	712,5493774	0,77627337	712,539917	0,48462677	712,539917	0,374180436	712,5493774	0,799435735	712,550293	0,50672853	712,550293	0,609427571	712,550293	0,66692996	712,5493774	0,625311255	712,539917	0,522867799	712,539917	0,321753323	712,539917	0,46464619
712,5751953	0,271536529	712,5742798	0,560066998	712,5648193	0,37762785	712,5648193	0,244741812	712,5742798	0,678249896	712,5751953	0,43091324	712,5751953	0,514724791	712,5751953	0,585714161	712,5742798	0,393226475	712,5648193	0,471850723	712,5648193	0,217931613	712,5648193	0,370770961
712,6000977	0,196511954	712,5991821	0,43313989	712,5897217	0,257045448	712,5897217	0,13779135	712,5991821	0,576672018	712,6000977	0,413311064	712,6000977	0,437114418	712,6000977	0,524146259	712,5991821	0,302117109	712,5897217	0,361847907	712,5897217	0,116051614	712,5897217	0,232727319
712,625	0,178285345	712,6240845	0,302384913	712,614624	0,197088301	712,614624	0,134318456	712,6240845	0,429244578	712,625	0,349216074	712,625	0,35357216	712,625	0,430820435	712,6240845	0,205811381	712,614624	0,287963986	712,614624	0,112366877	712,614624	0,190833241
712,6499023	0,102982767	712,6489868	0,172717661	712,6395264	0,128538951	712,6395264	0,11092364	712,6489868	0,278527796	712,6499023	0,22385627	712,6499023	0,20662497	712,6499023	0,276762784	712,6489868	0,116612859	712,6395264	0,197084799	712,6395264	0,10208448	712,6395264	0,140993997
712,6748047	0,092138395	712,6738892	0,165868208	712,6644287	0,081537008	712,6644287	0,06857992	712,6738892	0,228469908	712,6748047	0,172653481	712,6748047	0,154440194	712,6748047	0,203074381	712,6738892	0,133616015	712,6644287	0,116963685	712,6644287	0,054930445	712,6644287	0,078329213
712,699707	0,127309158	712,6987915	0,150095806	712,6893311	0,094532363	712,6893311	0,101513028	712,6987915	0,179975778	712,699707	0,16099292	712,699707	0,155672997	712,699707	0,177704602	712,6987915	0,128567219	712,6893311	0,113873407	712,6893311	0,080396384	712,6893311	0,093819544
712,7246094	0,08357954	712,7236938	0,089665696	712,7142334	0,084893964	712,7142334	0,096590213	712,7236938	0,108972594	712,7246094	0,091413379	712,7246094	0,108765446	712,7246094	0,109592646	712,7236938	0,077907667	712,7142334	0,098754615	712,7142334	0,084510677	712,7142334	0,095332325
712,7495117	0,069296412	712,7485962	0,106578678	712,7391968	0,054621223	712,7391968	0,05416055	712,7485962	0,118177712	712,7495117	0,077451579	712,7495117	0,08780513	712,7495117	0,090153508	712,7485962	0,097255036	712,7391968	0,061430667	712,7391968	0,047559403	712,7391968	0,055989999
712,7744141	0,090959467	712,7734985	0,117824212	712,7640991	0,070060112	712,7640991	0,075039595	712,7734985	0,113947883	712,7744141	0,10222134	712,7744141	0,117150024	712,7744141	0,113378748	712,7734985	0,107203797	712,7640991	0,078454986	712,7640991	0,065517515	712,7640991	0,07224378
712,7993164	0,063169055	712,7984009	0,070430718	712,7890015	0,065020755	712,7890015	0,078200854	712,7984009	0,074131988	712,7993164	0,066209376	712,7993164	0,079500273	712,7993164	0,08122047	712,7984009	0,059747718	712,7890015	0,076186657	712,7890015	0,076268405	712,7890015	0,08118321
712,8242188	0,043459658	712,8233032	0,083918281	712,8139038	0,043129247	712,8139038	0,038563143	712,8233032	0,088730544	712,8242188	0,054046109	712,8242188	0,051923681	712,8242188	0,061615113	712,8233032	0,07473813	712,8139038	0,045169577	712,8139038	0,036254369	712,8139038	0,044056643
712,8491211	0,0718835	712,8482056	0,107396372	712,8388062	0,058624003	712,8388062	0,061306879	712,8482056	0,100923836	712,8491211	0,083787113	712,8491211	0,076984756	712,8491211	0,088867009	712,8482056	0,099079967	712,8388062	0,059608907	712,8388062	0,052909456	712,8388062	0,058675934
712,8740234	0,073961429	712,8731079	0,06140421	712,8637085	0,062180735	712,8637085	0,082297489	712,8731079	0,064368978	712,8740234	0,073264644	712,8740234	0,076777935	712,8740234	0,080565445	712,8731079	0,056511335	712,8637085	0,062408596	712,8637085	0,080447994	712,8637085	0,072346039
712,8989258	0,051293317	712,8980103	0,070780747	712,8886108	0,039371733	712,8886108	0,04925609	712,8980103	0,072385535	712,8989258	0,039891321	712,8989258	0,044439126	712,8989258	0,046220712	712,8980103	0,068163283	712,8886108	0,036232248	712,8886108	0,045509133	712,8886108	0,036998041
712,9238281	0,065497287	712,9229126	0,094757713	712,9135132	0,052332312	712,9135132	0,060771096	712,9229126	0,09098506	712,9238281	0,0561755	712,9238281	0,053752594	712,9238281	0,06253247	712,9229126	0,093144506	712,9135132	0,049543623	712,9135132	0,051728267	712,9135132	0,045800038
712,9487305	0,105104379	712,9478149	0,09731587	712,9384155	0,064625025	712,9384155	0,089364454	712,9478149	0,084431663	712,9487305	0,071231693	712,9487305	0,084817253	712,9487305	0,080935478	712,9478149	0,099094629	712,9384155	0,064176448	712,9384155	0,076056078	712,9384155	0,069316126
712,9736328	0,092855044	712,9727173	0,061214767	712,9633179	0,056612849	712,9633179	0,096327558	712,9727173	0,055371325	712,9736328	0,042279352	712,9736328	0,056785107	712,9736328	0,053124763	712,9727173	0,082728222	712,9633179	0,060888447	712,9633179	0,087135166	712,9633179	0,074896216
712,9985352	0,166646436	712,9976196	0,107214123	712,9882202	0,051027171	712,9882202	0,093450755	712,9976196	0,081885889	712,9985352	0,054843411	712,9985352	0,075805515	712,9985352	0,062384509	712,9976196	0,171066672	712,9882202	0,043115575	712,9882202	0,070094548	712,9882202	0,049074743
713,0234375	0,387468427	713,022522	0,148316026	713,0131226	0,085480787	713,0131226	0,198427662	713,022522	0,09191376	713,0234375	0,088567339	713,0234375	0,148747951	713,0234375	0,10726431	713,022522	0,300047904	713,0131226	0,069515362	713,0131226	0,140898064	713,0131226	0,092695072
713,0483398	0,680230916	713,0474243	0,166041255	713,0380249	0,107700408	713,0380249	0,325276643	713,0474243	0,076106749	713,0483398	0,086113036	713,0483398	0,196786597	713,0483398	0,095429122	713,0474243	0,441413164	713,0380249	0,081985489	713,0380249	0,229101077	713,0380249	0,128318816
713,0732422	1,033914447	713,0723267	0,275673121	713,0629272	0,134767935	713,0629272	0,428027332	713,0723267	0,142243162	713,0732422	0,15075548	713,0732422	0,367016673	713,0732422	0,153899521	713,0723267	0,648872375	713,0629272	0,083405219	713,0629272	0,295552313	713,0629272	0,142228678
713,0981445	1,321701407	713,097229	0,352553546	713,0878296	0,236134738	713,0878296	0,56315279	713,097229	0,198462501	713,0981445	0,311916441	713,0981445	0,672014475	713,0981445	0,307349533	713,097229	0,70601666	713,0878296	0,15959622	713,0878296	0,385795951	713,0878296	0,250482738
713,1230469	1,187911034	713,1221313	0,300126463	713,1127319	0,286166996	713,1127319	0,547895074	713,1221313	0,190567747	713,1230469	0,445688725	713,1230469	0,868478	713,1230469	0,400660247	713,1221313	0,545642138	713,1127319	0,228313208	713,1127319	0,383505106	713,1127319	0,324653804
713,1479492	0,869719744	713,1470337	0,274137408	713,1376343	0,266192257	713,1376343	0,377216756	713,1470337	0,221659333	713,1479492	0,571180344	713,1479492	0,901198328	713,1479492	0,46164152	713,1470337	0,431246459	713,1376343	0,246651977	713,1376343	0,250984102	713,1376343	0,283985198
713,1728516	0,664337695	713,171936	0,243195146	713,1625366	0,250540107	713,1625366	0,290387124	713,171936	0,212428123	713,1728516	0,645242155	713,1728516	0,847272456	713,1728516	0,492739618	713,171936	0,344466299	713,1625366	0,274129927	713,1625366	0,201555774	713,1625366	0,26447469
713,1977539	0,470980763	713,1968384	0,145108461	713,187439	0,203581274	713,187439	0,230795979	713,1968384	0,137572467	713,1977539	0,545620084	713,1977539	0,649894238	713,1977539	0,406618685	713,1968384	0,213731587	713,187439	0,246009231	713,187439	0,181340054	713,187439	0,227452636
713,2226563	0,338355869	713,2217407	0,130283132	713,2123413	0,126475185	713,2123413	0,13901785	713,2217407	0,126127183	713,2226563	0,412705332	713,2226563	0,458575785	713,2226563	0,308580309	713,2217407	0,194495395	713,2123413	0,160409465	713,2123413	0,106870823	713,2123413	0,133359268
713,2475586	0,309315026	713,2467041	0,158332899	713,2372437	0,121074922	713,2372437	0,143673792	713,2467041	0,136332318	713,2475586	0,356532931	713,2475586	0,388603061	713,2475586	0,274082571	713,2467041	0,215994492	713,2372437	0,139614969	713,2372437	0,11438857	713,2372437	0,119692378
713,272522	0,275559098	713,2716064	0,114513353	713,262146	0,124677889	713,262146	0,179804385	713,2716064	0,087678649	713,272522	0,274231046	713,272522	0,324338526	713,272522	0,216886908	713,2716064	0,171678901	713,262146	0,137900651	713,262146	0,15253526	713,262146	0,136279494
713,2974243	0,234559208	713,2965088	0,141322181	713,2870483	0,091125108	713,2870483	0,148091763	713,2965088	0,095216647	713,2974243	0,203214288	713,2974243	0,238992587	713,2974243	0,160819888	713,2965088	0,219478875	713,2870483	0,096165106	713,2870483	0,126061067	713,2870483	0,095189087
713,3223267	0,25979203	713,3214111	0,250720114	713,3119507	0,11928682	713,3119507	0,198391274	713,3214111	0,148427501	713,3223267	0,21026583	713,3223267	0,246504679	713,3223267	0,174835786	713,3214111	0,367778867	713,3119507	0,104742311	713,3119507	0,157206029	713,3119507	0,116302162
713,347229	0,331885725	713,3463135	0,32166487	713,3369141	0,176170394	713,3369141	0,316287071	713,3463135	0,154253706	713,347229	0,214676246	713,347229	0,278793454	713,347229	0,201075733	713,3463135	0,493186861	713,3369141	0,147903383	713,3369141	0,274335593	713,3369141	0,190804884
713,3721313	0,374973893	713,3712158	0,428978533	713,3618164	0,197273448	713,3618164	0,367858022	713,3712158	0,203027561	713,3721313	0,170609534	713,3721313	0,265033692	713,3721313	0,184593499	713,3712158	0,636139035	713,3618164	0,153168932	713,3618164	0,331893712	713,3618164	0,206893802
713,3970337	0,462672859	713,3961182	0,621896982	713,3867188	0,258712888	713,3867188	0,43855381	713,3961182	0,340168297	713,3970337	0,19445011	713,3970337	0,301135004	713,3970337	0,230579332	713,3961182	0,839637399	713,3867188	0,18278262	713,3867188	0,383824408	713,3867188	0,252175689
713,421936	0,56406194	713,4210205	0,833136141	713,4116211	0,405323386	713,4116211	0,556526244	713,4210205	0,508520484	713,421936	0,274604321	713,421936	0,443538755	713,421936	0,362441987	713,4210205	0,985424519	713,4116211	0,306505322	713,4116211	0,487326562	713,4116211	0,39297387
713,4468384	0,523638666	713,4459229	0,89510268	713,4365234	0,496635973	713,4365234	0,550743401	713,4459229	0,633275986	713,4468384	0,315834403	713,4468384	0,500400901	713,4468384	0,450519025	713,4459229	0,940661192	713,4365234	0,436074167	713,4365234	0,498807758	713,4365234	0,497034729
713,4717407	0,445096463	713,4708252	0,959047556	713,4614258	0,491335541	713,4614258	0,457888335	713,4708252	0,775800884	713,4717407	0,376506418	713,4717407	0,50812465	713,4717407	0,530570149	713,4708252	0,945844948	713,4614258	0,493799806	713,4614258	0,419250906	713,4614258	0,473042876
713,4966431	0,450605333	713,4957275	0,986320257	713,4863281	0,489486396	713,4863281	0,449018568	713,4957275	0,842120826	713,4966431	0,456430823	713,4966431	0,551522672	713,4966431	0,617784441	713,4957275	0,918416739	713,4863281	0,528412104	713,4863281	0,402705818	713,4863281	0,464820713
713,5215454	0,389556557	713,5206299	0,876400352	713,5112305	0,472363025	713,5112305	0,430815816	713,5206299	0,808443725	713,5215454	0,43063423	713,5215454	0,50410825	713,5215454	0,59539777	713,5206299	0,753341913	713,5112305	0,5171718	713,5112305	0,38590166	713,5112305	0,45725745
713,5464478	0,297631741	713,5455322	0,775251389	713,5361328	0,401004255	713,5361328	0,312197089	713,5455322	0,797456443	713,5464478	0,390430778	713,5464478	0,444892615	713,5464478	0,553169191	713,5455322	0,614315629	713,5361328	0,454783797	713,5361328	0,268181413	713,5361328	0,373000562
713,5713501	0,271620661	713,5704346	0,654677212	713,5610352	0,358234584	713,5610352	0,241722524	713,5704346	0,740408897	713,5713501	0,404487401	713,5713501	0,448660076	713,5713501	0,550786495	713,5704346	0,487495035	713,5610352	0,435362577	713,5610352	0,197952881	713,5610352	0,331044316
713,5962524	0,203502998	713,5953369	0,43226999	713,5859375	0,292336851	713,5859375	0,200253159	713,5953369	0,575548112	713,5962524	0,347357869	713,5962524	0,370278448	713,5962524	0,468842536	713,5953369	0,288966894	713,5859375	0,385678411	713,5859375	0,174028203	713,5859375	0,285584509
713,6211548	0,117023915	713,6202393	0,300195694	713,6108398	0,175677195	713,6108398	0,108725585	713,6202393	0,44211629	713,6211548	0,264851481	713,6211548	0,245146006	713,6211548	0,34732613	713,6202393	0,199577257	713,6108398	0,265020967	713,6108398	0,091893807	713,6108398	0,16995354
713,6460571	0,132034868	713,6451416	0,256545961	713,6357422	0,13248454	713,6357422	0,092389114	713,6451416	0,356894791	713,6460571	0,239631325	713,6460571	0,20901373	713,6460571	0,293187588	713,6451416	0,192425981	713,6357422	0,196850985	713,6357422	0,075903565	713,6357422	0,121209286
713,6709595	0,136169463	713,6700439	0,159652323	713,6606445	0,12097168	713,6606445	0,122230783	713,6700439	0,227738798	713,6709595	0,180479363	713,6709595	0,170641214	713,6709595	0,217366174	713,6700439	0,122375965	713,6606445	0,163838223	713,6606445	0,108438596	713,6606445	0,126295164
713,6958618	0,100174554	713,6949463	0,11014796	713,6855469	0,073519878	713,6855469	0,08040446	713,6949463	0,161877006	713,6958618	0,107646331	713,6958618	0,109308064	713,6958618	0,132471859	713,6949463	0,102022462	713,6855469	0,097932294	713,6855469	0,070393763	713,6855469	0,074151561
713,7207642	0,13256748	713,7198486	0,142291307	713,7104492	0,067836136	713,7104492	0,070763491	713,7198486	0,162472367	713,7207642	0,121977396	713,7207642	0,129818678	713,7207642	0,133111551	713,7198486	0,144482136	713,7104492	0,081849977	713,7104492	0,052872956	713,7104492	0,061658997
713,7456665	0,139346153	713,744751	0,104792796	713,7353516	0,08659827	713,7353516	0,103864752	713,744751	0,113815971	713,7456665	0,114903234	713,7456665	0,149413452	713,7456665	0,123787805	713,744751	0,098621398	713,7353516	0,097580388	713,7353516	0,08916045	713,7353516	0,094755463
713,7705688	0,094438128	713,7696533	0,068471529	713,7602539	0,05456176	713,7602539	0,058638919	713,7696533	0,082021572	713,7705688	0,085349962	713,7705688	0,112799503	713,7705688	0,0990806	713,7696533	0,060699537	713,7602539	0,067757897	713,7602539	0,06115365	713,7602539	0,065713614
713,7954712	0,066431336	713,7945557	0,102321588	713,7851563	0,045071613	713,7851563	0,038757619	713,7945557	0,10522797	713,7954712	0,083497055	713,7954712	0,083402388	713,7954712	0,088353917	713,7945557	0,092034847	713,7851563	0,049137503	713,7851563	0,034805432	713,7851563	0,039906215
713,8203735	0,092175469	713,819458	0,104059063	713,8100586	0,064172976	713,8100586	0,072048292	713,819458	0,100598708	713,8203735	0,109170713	713,8203735	0,105636582	713,8203735	0,104736283	713,819458	0,094774842	713,8100586	0,069235869	713,8100586	0,067794338	713,8100586	0,069085844
713,8452759	0,0718766	713,8443604	0,055074427	713,8349609	0,058181968	713,8349609	0,071171336	713,8443604	0,057307981	713,8452759	0,069942527	713,8452759	0,087920912	713,8452759	0,075038813	713,8443604	0,047772642	713,8349609	0,071190082	713,8349609	0,07445021	713,8349609	0,07317061
713,8701782	0,047424201	713,8692627	0,062967867	713,8598633	0,033303782	713,8598633	0,036404077	713,8692627	0,065787785	713,8701782	0,044454314	713,8701782	0,048852336	713,8701782	0,050941989	713,8692627	0,061477188	713,8598633	0,036378574	713,8598633	0,035055999	713,8598633	0,033985723
713,8950806	0,080691628	713,894165	0,095226765	713,8847656	0,046371784	713,8847656	0,05160651	713,894165	0,084435806	713,8950806	0,064922631	713,8950806	0,070276372	713,8950806	0,072011933	713,894165	0,094476119	713,8847656	0,047405288	713,8847656	0,045673493	713,8847656	0,042998604
713,9199829	0,085306756	713,9190674	0,059013009	713,909668	0,057873875	713,909668	0,081439614	713,9190674	0,050346091	713,9199829	0,055008147	713,9199829	0,071577117	713,9199829	0,065114431	713,9190674	0,059731733	713,909668	0,061031532	713,909668	0,084004134	713,909668	0,070312351
713,9448853	0,063969553	713,9440308	0,066597097	713,9345703	0,032391142	713,9345703	0,051178083	713,9440308	0,057920914	713,9448853	0,040435202	713,9448853	0,051727358	713,9448853	0,047733665	713,9440308	0,071626008	713,9345703	0,037466418	713,9345703	0,051616196	713,9345703	0,038532365
713,9697876	0,125771821	713,9689331	0,110204838	713,9595337	0,050798226	713,9595337	0,077289514	713,9689331	0,087232389	713,9697876	0,068864606	713,9697876	0,083284043	713,9697876	0,073272645	713,9689331	0,141886994	713,9595337	0,045303825	713,9595337	0,059853718	713,9595337	0,047599047
713,9946899	0,243495136	713,9938354	0,094300203	713,984436	0,074058734	713,984436	0,149883956	713,9938354	0,060142092	713,9946899	0,064386882	713,9946899	0,115088768	713,9946899	0,078530364	713,9938354	0,186012432	713,984436	0,073217094	713,984436	0,120559134	713,984436	0,087581828
714,0196533	0,488662452	714,0187378	0,130227864	714,0093384	0,065644674	714,0093384	0,201124489	714,0187378	0,064431764	714,0196533	0,055850025	714,0196533	0,123048261	714,0196533	0,066336162	714,0187378	0,367212385	714,0093384	0,054485235	714,0093384	0,142282292	714,0093384	0,071464345
714,0445557	1,064124227	714,0436401	0,273360401	714,0342407	0,1083249	714,0342407	0,349403411	714,0436401	0,129899263	714,0445557	0,12119399	714,0445557	0,279123753	714,0445557	0,13572447	714,0436401	0,662699997	714,0342407	0,064992674	714,0342407	0,21459648	714,0342407	0,098269902
714,069458	1,513196349	714,0685425	0,33789134	714,0591431	0,201397866	714,0591431	0,500551224	714,0685425	0,164516836	714,069458	0,228581145	714,069458	0,570436716	714,069458	0,247175813	714,0685425	0,734623015	714,0591431	0,130379617	714,0591431	0,325608224	714,0591431	0,214302912
714,0943604	1,448855281	714,0934448	0,333736539	714,0840454	0,236783251	714,0840454	0,450252265	714,0934448	0,201586425	714,0943604	0,384108484	714,0943604	0,855543554	714,0943604	0,380422324	714,0934448	0,62955004	714,0840454	0,172355682	714,0840454	0,299509436	714,0840454	0,253333062
714,1192627	1,139840722	714,1183472	0,337598383	714,1089478	0,242230922	714,1089478	0,359544873	714,1183472	0,269166768	714,1192627	0,629349709	714,1192627	1,052374601	714,1192627	0,550358474	714,1183472	0,524327755	714,1089478	0,206183001	714,1089478	0,228038356	714,1089478	0,239407286
714,144165	0,80411166	714,1432495	0,258606613	714,1338501	0,244656101	714,1338501	0,318042845	714,1432495	0,23006469	714,144165	0,737644017	714,144165	0,997534394	714,144165	0,596141934	714,1432495	0,358613282	714,1338501	0,246607795	714,1338501	0,216103271	714,1338501	0,251821637
714,1690674	0,489903688	714,1681519	0,153775528	714,1587524	0,184718311	714,1587524	0,221441805	714,1681519	0,162880167	714,1690674	0,64472878	714,1690674	0,734211564	714,1690674	0,477773935	714,1681519	0,214565456	714,1587524	0,210248023	714,1587524	0,160248414	714,1587524	0,201459125
714,1939697	0,360250115	714,1930542	0,158088043	714,1836548	0,135370165	714,1836548	0,138430014	714,1930542	0,156954601	714,1939697	0,531786561	714,1939697	0,536772311	714,1939697	0,386465997	714,1930542	0,207238644	714,1836548	0,154401079	714,1836548	0,096728921	714,1836548	0,126402095
714,2188721	0,322556555	714,2179565	0,133295372	714,2085571	0,131471515	714,2085571	0,157408163	714,2179565	0,124441572	714,2188721	0,418045908	714,2188721	0,430941284	714,2188721	0,306466818	714,2179565	0,172348753	714,2085571	0,152570263	714,2085571	0,117146239	714,2085571	0,134946704
714,2437744	0,256108522	714,2428589	0,08266066	714,2334595	0,102301516	714,2334595	0,141077638	714,2428589	0,077614695	714,2437744	0,300534129	714,2437744	0,326896787	714,2437744	0,222704947	714,2428589	0,124642007	714,2334595	0,122365303	714,2334595	0,120606512	714,2334595	0,117149621
714,2686768	0,205615371	714,2677612	0,122752547	714,2583618	0,076365098	714,2583618	0,110195488	714,2677612	0,102742918	714,2686768	0,226505041	714,2686768	0,24831605	714,2686768	0,170782238	714,2677612	0,18135047	714,2583618	0,083453737	714,2583618	0,087524451	714,2583618	0,076764002
714,2935791	0,238723636	714,2926636	0,165694654	714,2832642	0,10100808	714,2832642	0,153594762	714,2926636	0,12156295	714,2935791	0,221985415	714,2935791	0,249221131	714,2935791	0,176807106	714,2926636	0,235851899	714,2832642	0,09652587	714,2832642	0,118301868	714,2832642	0,101691104
714,3184814	0,258313686	714,3175659	0,148162574	714,3081665	0,126380056	714,3081665	0,207416013	714,3175659	0,087818995	714,3184814	0,188112557	714,3184814	0,232274488	714,3184814	0,165089861	714,3175659	0,226929098	714,3081665	0,116580471	714,3081665	0,168547451	714,3081665	0,13633281
714,3433838	0,239067569	714,3424683	0,202083632	714,3330688	0,12183959	714,3330688	0,212668493	714,3424683	0,105725899	714,3433838	0,146718547	714,3433838	0,192423269	714,3433838	0,138563678	714,3424683	0,314204901	714,3330688	0,100890063	714,3330688	0,180720195	714,3330688	0,126070276
714,3682861	0,334362507	714,3673706	0,370580375	714,3579712	0,163910985	714,3579712	0,269150257	714,3673706	0,205648839	714,3682861	0,182180017	714,3682861	0,247956395	714,3682861	0,187232375	714,3673706	0,541805208	714,3579712	0,124575093	714,3579712	0,224350452	714,3579712	0,155827329
714,3931885	0,489325315	714,3922729	0,513076127	714,3828735	0,256466776	714,3828735	0,409588128	714,3922729	0,267733335	714,3931885	0,187468499	714,3931885	0,322447449	714,3931885	0,241503671	714,3922729	0,754043877	714,3828735	0,205321416	714,3828735	0,372670263	714,3828735	0,263691187
714,4180908	0,64872551	714,4171753	0,722063363	714,4077759	0,320403397	714,4077759	0,486034513	714,4171753	0,384496719	714,4180908	0,193713233	714,4180908	0,377618492	714,4180908	0,288985848	714,4171753	1,006968617	714,4077759	0,254957557	714,4077759	0,467757642	714,4077759	0,320364177
714,4429932	0,834632516	714,4420776	1,034622312	714,4326782	0,417308062	714,4326782	0,539043784	714,4420776	0,619354248	714,4429932	0,296954125	714,4429932	0,61433053	714,4429932	0,469642788	714,4420776	1,259967208	714,4326782	0,337560654	714,4326782	0,51729995	714,4326782	0,394846469
714,4678955	0,83765173	714,46698	1,230713487	714,4575806	0,549617171	714,4575806	0,606009424	714,46698	0,821138144	714,4678955	0,421560615	714,4678955	0,915678144	714,4678955	0,708102167	714,46698	1,280448318	714,4575806	0,480554312	714,4575806	0,570351183	714,4575806	0,530835748
714,4927979	0,639356554	714,4918823	1,275882363	714,4824829	0,577919781	714,4824829	0,534246802	714,4918823	0,985541761	714,4927979	0,512647867	714,4927979	1,00400722	714,4927979	0,877779067	714,4918823	1,14277494	714,4824829	0,559386492	714,4824829	0,513724029	714,4824829	0,551328182
714,5177002	0,515547812	714,5167847	1,273746848	714,5073853	0,549219131	714,5073853	0,427794755	714,5167847	1,131053686	714,5177002	0,60870862	714,5177002	0,962321997	714,5177002	0,986376405	714,5167847	1,005262136	714,5073853	0,586647987	714,5073853	0,390550762	714,5073853	0,504238307
714,5426025	0,417951196	714,541687	1,083362222	714,5322876	0,512649775	714,5322876	0,364814937	714,541687	1,108009219	714,5426025	0,61313957	714,5426025	0,832464695	714,5426025	0,9428671	714,541687	0,76836884	714,5322876	0,599378347	714,5322876	0,324686557	714,5322876	0,481063217
714,5675049	0,259939432	714,5665894	0,792243361	714,557251	0,400374979	714,557251	0,257604808	714,5665894	0,956026077	714,5675049	0,494645387	714,5675049	0,611585677	714,5675049	0,768960536	714,5665894	0,498348057	714,557251	0,527016878	714,557251	0,237106189	714,557251	0,385753423
714,5924072	0,184158966	714,5914917	0,604590476	714,5821533	0,270909399	714,5821533	0,149652362	714,5914917	0,805324554	714,5924072	0,429824859	714,5924072	0,436902136	714,5924072	0,625705063	714,5914917	0,376226634	714,5821533	0,398802221	714,5821533	0,127882734	714,5821533	0,250162542
714,6173096	0,172743514	714,6164551	0,433983177	714,6070557	0,214956149	714,6070557	0,142142802	714,6164551	0,606905639	714,6173096	0,358051419	714,6173096	0,363696456	714,6173096	0,501240373	714,6164551	0,270114779	714,6070557	0,317026317	714,6070557	0,121926457	714,6070557	0,206391141
714,6422119	0,1100109	714,6413574	0,254693359	714,631958	0,149901554	714,631958	0,120063528	714,6413574	0,400540262	714,6422119	0,233378738	714,6422119	0,223612532	714,6422119	0,326130092	714,6413574	0,147026181	714,631958	0,231589943	714,631958	0,113207005	714,631958	0,154652968
714,6671143	0,081891373	714,6662598	0,200726584	714,6568604	0,090414956	714,6568604	0,068241552	714,6662598	0,307540804	714,6671143	0,169877231	714,6671143	0,149683684	714,6671143	0,224106118	714,6662598	0,141100556	714,6568604	0,143192664	714,6568604	0,059954163	714,6568604	0,08254277
714,6920166	0,122673988	714,6911621	0,169500381	714,6817627	0,092466235	714,6817627	0,093480289	714,6911621	0,235489756	714,6920166	0,174523041	714,6920166	0,161472857	714,6920166	0,211115867	714,6911621	0,133996382	714,6817627	0,125861093	714,6817627	0,078534342	714,6817627	0,090995662
714,7169189	0,123347424	714,7160645	0,09379866	714,706665	0,082231194	714,706665	0,093109258	714,7160645	0,139518246	714,7169189	0,128120601	714,7169189	0,146405622	714,7169189	0,161219791	714,7160645	0,073676653	714,706665	0,106560826	714,706665	0,086138785	714,706665	0,095100082
714,7418213	0,070421614	714,7409668	0,093917817	714,7315674	0,057586897	714,7315674	0,058520164	714,7409668	0,125126988	714,7418213	0,080513053	714,7418213	0,088146418	714,7418213	0,09595646	714,7409668	0,077369973	714,7315674	0,077960439	714,7315674	0,054271039	714,7315674	0,059379265
714,7667847	0,087788768	714,7658691	0,110896014	714,7564697	0,04946414	714,7564697	0,043149114	714,7658691	0,131770372	714,7667847	0,095212147	714,7667847	0,09967342	714,7667847	0,107048631	714,7658691	0,101510458	714,7564697	0,061666179	714,7564697	0,038431123	714,7564697	0,042614661
714,791687	0,095120415	714,7907715	0,087991819	714,7813721	0,066525817	714,7813721	0,073198512	714,7907715	0,096837915	714,791687	0,096030898	714,791687	0,105114385	714,791687	0,100574523	714,7907715	0,075512841	714,7813721	0,074848555	714,7813721	0,066855967	714,7813721	0,068157926
714,8165894	0,052549753	714,8156738	0,048712235	714,8062744	0,045680258	714,8062744	0,053301614	714,8156738	0,06237942	714,8165894	0,053682305	714,8165894	0,05978078	714,8165894	0,060461812	714,8156738	0,0456721	714,8062744	0,055285763	714,8062744	0,055539746	714,8062744	0,054874882
714,8414917	0,066201948	714,8405762	0,078436129	714,8311768	0,032100365	714,8311768	0,030680321	714,8405762	0,081641212	714,8414917	0,065206803	714,8414917	0,061270453	714,8414917	0,065391533	714,8405762	0,080544695	714,8311768	0,035590474	714,8311768	0,029033834	714,8311768	0,029808454
714,866394	0,105207399	714,8654785	0,08277712	714,8560791	0,054110352	714,8560791	0,064288244	714,8654785	0,073676772	714,866394	0,071319632	714,866394	0,083384521	714,866394	0,0771745	714,8654785	0,080907434	714,8560791	0,056013223	714,8560791	0,05946029	714,8560791	0,054189958
714,8912964	0,062055871	714,8903809	0,050764311	714,8809814	0,047199227	714,8809814	0,06712617	714,8903809	0,046867121	714,8912964	0,040904474	714,8912964	0,052127633	714,8912964	0,050076757	714,8903809	0,052880447	714,8809814	0,050217748	714,8809814	0,06800779	714,8809814	0,057840787
714,9161987	0,082487769	714,9152832	0,086966775	714,9058838	0,036949094	714,9058838	0,044738341	714,9152832	0,076289907	714,9161987	0,052080479	714,9161987	0,060307398	714,9161987	0,057579715	714,9152832	0,097366557	714,9058838	0,034321722	714,9058838	0,044608828	714,9058838	0,032545291
714,9411011	0,156009883	714,9401855	0,107309557	714,9307861	0,059237331	714,9307861	0,088224463	714,9401855	0,077800207	714,9411011	0,078934431	714,9411011	0,106187508	714,9411011	0,087347239	714,9401855	0,127230242	714,9307861	0,057005014	714,9307861	0,079589121	714,9307861	0,059527684
714,9660034	0,188724563	714,9650879	0,088869005	714,9556885	0,059103005	714,9556885	0,120170183	714,9650879	0,05687619	714,9660034	0,050826643	714,9660034	0,094844304	714,9660034	0,066031136	714,9650879	0,141011819	714,9556885	0,05991533	714,9556885	0,111403003	714,9556885	0,075496726
714,9909058	0,429060996	714,9899902	0,174143001	714,9805908	0,051322762	714,9805908	0,174256235	714,9899902	0,091885753	714,9909058	0,071256056	714,9909058	0,121775173	714,9909058	0,082291387	714,9899902	0,354057908	714,9805908	0,045174126	714,9805908	0,117528178	714,9805908	0,055810902
715,0158081	1,157052636	715,0148926	0,327705711	715,0054932	0,111188717	715,0054932	0,412506789	715,0148926	0,13291809	715,0158081	0,135475397	715,0158081	0,28477475	715,0158081	0,160120845	715,0148926	0,77913636	715,0054932	0,079627179	715,0054932	0,24947226	715,0054932	0,116874039
715,0407104	2,313571453	715,0397949	0,500755668	715,0303955	0,197232366	715,0303955	0,699587762	715,0397949	0,180735424	715,0407104	0,19622992	715,0407104	0,576961696	715,0407104	0,251730889	715,0397949	1,23869431	715,0303955	0,119625844	715,0303955	0,430799723	715,0303955	0,219795674
715,0656128	3,29400754	715,0646973	0,728085399	715,0552979	0,311304659	715,0552979	0,821701646	715,0646973	0,356710374	715,0656128	0,427092791	715,0656128	1,166677237	715,0656128	0,510760605	715,0646973	1,514918566	715,0552979	0,168879762	715,0552979	0,483025789	715,0552979	0,310789883
715,0905151	3,286533117	715,0895996	0,805318832	715,0802002	0,461460114	715,0802002	0,762195766	715,0895996	0,515507936	715,0905151	0,911395967	715,0905151	1,961950064	715,0905151	0,957376182	715,0895996	1,356332302	715,0802002	0,31603393	715,0802002	0,454154611	715,0802002	0,450707108
715,1154175	2,347930908	715,114502	0,620471299	715,1051025	0,46745041	715,1051025	0,589206219	715,114502	0,517276406	715,1154175	1,377023816	715,1154175	2,297154188	715,1154175	1,292899013	715,114502	0,916211188	715,1051025	0,416752309	715,1051025	0,377111316	715,1051025	0,474742413
715,1403198	1,601052284	715,1394043	0,465224504	715,1300049	0,346072286	715,1300049	0,365232795	715,1394043	0,472187012	715,1403198	1,571393847	715,1403198	2,095262289	715,1403198	1,310490131	715,1394043	0,616033077	715,1300049	0,374081671	715,1300049	0,233843133	715,1300049	0,344424635
715,1652222	1,134600997	715,1643066	0,366466731	715,1549683	0,274819881	715,1549683	0,272916168	715,1643066	0,391530514	715,1652222	1,556693554	715,1652222	1,75721848	715,1652222	1,211674929	715,1643066	0,45479098	715,1549683	0,321280986	715,1549683	0,170960322	715,1549683	0,273047209
715,1901245	0,762868702	715,189209	0,26218769	715,1798706	0,227072001	715,1798706	0,241581351	715,189209	0,286774606	715,1901245	1,263743281	715,1901245	1,235145569	715,1901245	0,935599566	715,189209	0,319734514	715,1798706	0,281965494	715,1798706	0,167334244	715,1798706	0,244280994
715,2150269	0,497369528	715,2141113	0,188830703	715,2047729	0,174923748	715,2047729	0,187693477	715,2141113	0,214715481	715,2150269	0,860939026	715,2150269	0,782674968	715,2150269	0,615484297	715,2141113	0,235116392	715,2047729	0,225068361	715,2047729	0,144166589	715,2047729	0,186610565
715,2399292	0,376713872	715,2390137	0,186889425	715,2296753	0,117434055	715,2296753	0,119116314	715,2390137	0,191721961	715,2399292	0,598141849	715,2399292	0,541362643	715,2399292	0,441372663	715,2390137	0,237561539	715,2296753	0,149907842	715,2296753	0,092124932	715,2296753	0,113259122
715,2648315	0,345398754	715,263916	0,183370218	715,2545776	0,128610939	715,2545776	0,149760932	715,263916	0,163149074	715,2648315	0,453875005	715,2648315	0,447776765	715,2648315	0,353828788	715,263916	0,236193717	715,2545776	0,140996546	715,2545776	0,120808065	715,2545776	0,128118232
715,2897339	0,270491242	715,2888184	0,140863419	715,27948	0,112962827	715,27948	0,173261076	715,2888184	0,114184648	715,2897339	0,297640741	715,2897339	0,325862706	715,2897339	0,241465136	715,2888184	0,202232882	715,27948	0,123169035	715,27948	0,150313646	715,27948	0,13045162
715,3146362	0,253732353	715,3137817	0,202654883	715,3043823	0,101959564	715,3043823	0,169589311	715,3137817	0,146748126	715,3146362	0,249084562	715,3146362	0,257018149	715,3146362	0,200688243	715,3137817	0,289666802	715,3043823	0,089954056	715,3043823	0,138136387	715,3043823	0,104382694
715,3395386	0,321337759	715,3386841	0,273026705	715,3292847	0,160532951	715,3292847	0,252339244	715,3386841	0,173024267	715,3395386	0,234871	715,3395386	0,280096173	715,3395386	0,222825125	715,3386841	0,382495344	715,3292847	0,125922531	715,3292847	0,199125394	715,3292847	0,158192858
715,3644409	0,319651753	715,3635864	0,302172154	715,354187	0,20112361	715,354187	0,297895014	715,3635864	0,182271466	715,3644409	0,196089461	715,3644409	0,259824544	715,3644409	0,20596011	715,3635864	0,443871975	715,354187	0,156303629	715,354187	0,252684951	715,354187	0,213201255
715,3893433	0,378907412	715,3884888	0,474124998	715,3790894	0,210744604	715,3790894	0,31288287	715,3884888	0,285141647	715,3893433	0,198914334	715,3893433	0,266259074	715,3893433	0,216418833	715,3884888	0,718017519	715,3790894	0,162882194	715,3790894	0,2776106	715,3790894	0,209455341
715,4142456	0,62894547	715,4133911	0,782491326	715,4039917	0,304232925	715,4039917	0,496199965	715,4133911	0,414513826	715,4142456	0,265884548	715,4142456	0,387913346	715,4142456	0,319677413	715,4133911	1,211107373	715,4039917	0,232156217	715,4039917	0,45479545	715,4039917	0,291284889
715,4391479	1,053011417	715,4382935	1,183685303	715,428894	0,452501535	715,428894	0,856718481	715,4382935	0,588934124	715,4391479	0,293153703	715,4391479	0,572519422	715,4391479	0,425484926	715,4382935	1,859838009	715,428894	0,319347739	715,428894	0,790691972	715,428894	0,435390055
715,4640503	1,647287846	715,4631958	1,786751032	715,4537964	0,715639114	715,4537964	1,263171077	715,4631958	0,976141453	715,4640503	0,397863746	715,4640503	0,954553723	715,4640503	0,666695237	715,4631958	2,528856993	715,4537964	0,440813333	715,4537964	1,115520835	715,4537964	0,62878859
715,4890137	2,134437323	715,4880981	2,250212431	715,4786987	1,152864933	715,4786987	1,493784666	715,4880981	1,476776123	715,4890137	0,685952961	715,4890137	1,673607469	715,4890137	1,170840383	715,4880981	2,71727252	715,4786987	0,745604277	715,4786987	1,264488935	715,4786987	0,964159667
715,513916	1,941794634	715,5130005	2,18877244	715,5036011	1,443930984	715,5036011	1,286189437	715,5130005	1,809126854	715,513916	1,036293864	715,513916	2,328855276	715,513916	1,73925364	715,5130005	2,223996401	715,5036011	1,115448833	715,5036011	1,07952261	715,5036011	1,197799921
715,5388184	1,324947834	715,5379028	1,822946072	715,5285034	1,292252779	715,5285034	0,830865085	715,5379028	1,899805546	715,5388184	1,352184892	715,5388184	2,490629435	715,5388184	2,081597567	715,5379028	1,598370314	715,5285034	1,263256907	715,5285034	0,699984968	715,5285034	1,064611912
715,5637207	0,956054032	715,5628052	1,38886404	715,5534058	0,949748695	715,5534058	0,520003259	715,5628052	1,721772075	715,5637207	1,490776181	715,5637207	2,259844542	715,5637207	2,124727726	715,5628052	1,107574701	715,5534058	1,159126043	715,5534058	0,434221387	715,5534058	0,788560987
715,588623	0,717295587	715,5877075	0,922623038	715,5783081	0,648787081	715,5783081	0,359199524	715,5877075	1,310593128	715,588623	1,424615622	715,588623	1,873253226	715,588623	1,911255717	715,5877075	0,675152063	715,5783081	0,892086506	715,5783081	0,307083786	715,5783081	0,564682186
715,6135254	0,428351969	715,6126099	0,651331425	715,6032104	0,386800855	715,6032104	0,202476606	715,6126099	1,016287804	715,6135254	1,096649885	715,6135254	1,249102235	715,6135254	1,402792931	715,6126099	0,45809117	715,6032104	0,57799983	715,6032104	0,180584177	715,6032104	0,33802709
715,6384277	0,276518643	715,6375122	0,520206451	715,6281128	0,267156005	715,6281128	0,149514377	715,6375122	0,818707705	715,6384277	0,790856719	715,6384277	0,808915794	715,6384277	0,974834144	715,6375122	0,381852597	715,6281128	0,409366935	715,6281128	0,124764614	715,6281128	0,223216355
715,6633301	0,261304677	715,6624146	0,381780922	715,6530151	0,223874226	715,6530151	0,158351853	715,6624146	0,579969049	715,6633301	0,582942426	715,6633301	0,584368348	715,6633301	0,698836803	715,6624146	0,298281938	715,6530151	0,324361712	715,6530151	0,129621476	715,6530151	0,198180422
715,6882324	0,19753319	715,6873169	0,235900447	715,6779175	0,165973395	715,6779175	0,145311609	715,6873169	0,376693934	715,6882324	0,380088925	715,6882324	0,400577068	715,6882324	0,462378174	715,6873169	0,181858644	715,6779175	0,229491308	715,6779175	0,127585113	715,6779175	0,161481887
715,7131348	0,155396953	715,7122192	0,201885194	715,7028198	0,109674841	715,7028198	0,087989204	715,7122192	0,293226928	715,7131348	0,265962064	715,7131348	0,26590085	715,7131348	0,310359806	715,7122192	0,179280818	715,7028198	0,145371139	715,7028198	0,078975886	715,7028198	0,094539925
715,7380371	0,198123053	715,7371216	0,189016461	715,7277222	0,113834269	715,7277222	0,104387864	715,7371216	0,240789443	715,7380371	0,236016825	715,7380371	0,259083837	715,7380371	0,271733999	715,7371216	0,180557564	715,7277222	0,135331482	715,7277222	0,084005602	715,7277222	0,103523932
715,7629395	0,167711645	715,7620239	0,116337843	715,7526855	0,097967446	715,7526855	0,109932214	715,7620239	0,152779877	715,7629395	0,170393601	715,7629395	0,214229017	715,7629395	0,20139952	715,7620239	0,10420198	715,7526855	0,124241337	715,7526855	0,096015915	715,7526855	0,110457562
715,7878418	0,093728311	715,7869263	0,113318719	715,7775879	0,057814091	715,7775879	0,052765738	715,7869263	0,138147131	715,7878418	0,125168011	715,7878418	0,150932401	715,7878418	0,147380069	715,7869263	0,104534	715,7775879	0,074707605	715,7775879	0,053706471	715,7775879	0,054551356
715,8127441	0,114444092	715,8118286	0,134105578	715,8024902	0,069189303	715,8024902	0,066093914	715,8118286	0,143394515	715,8127441	0,139832556	715,8127441	0,165825188	715,8127441	0,158506632	715,8118286	0,13230826	715,8024902	0,078119941	715,8024902	0,058353554	715,8024902	0,060627908
715,8376465	0,114629604	715,836731	0,083908595	715,8273926	0,076798506	715,8273926	0,088424481	715,836731	0,090477459	715,8376465	0,113377169	715,8376465	0,141416252	715,8376465	0,126422659	715,836731	0,079750963	715,8273926	0,085472919	715,8273926	0,086834766	715,8273926	0,0850299
715,8625488	0,073969752	715,8616333	0,085214317	715,8522949	0,042893983	715,8522949	0,053695254	715,8616333	0,088136069	715,8625488	0,078893006	715,8625488	0,089689784	715,8625488	0,085924499	715,8616333	0,085800648	715,8522949	0,049720485	715,8522949	0,052762721	715,8522949	0,048032891
715,8874512	0,109836914	715,8865356	0,126759812	715,8771973	0,057716884	715,8771973	0,060675327	715,8865356	0,116629176	715,8874512	0,10202983	715,8874512	0,106013522	715,8874512	0,105093285	715,8865356	0,130016699	715,8771973	0,054041106	715,8771973	0,052239366	715,8771973	0,051478043
715,9123535	0,126593143	715,911438	0,094545566	715,9020996	0,077913351	715,9020996	0,100649767	715,911438	0,082291797	715,9123535	0,090244718	715,9123535	0,123493873	715,9123535	0,105097383	715,911438	0,097805381	715,9020996	0,076926112	715,9020996	0,095224209	715,9020996	0,089365751
715,9372559	0,090425253	715,9363403	0,087774344	715,927002	0,04939384	715,927002	0,069912963	715,9363403	0,077803209	715,9372559	0,05609544	715,9372559	0,082972243	715,9372559	0,079619482	715,9363403	0,103426047	715,927002	0,053192452	715,927002	0,072705828	715,927002	0,054785922
715,9621582	0,151808545	715,9612427	0,147263989	715,9519043	0,056316394	715,9519043	0,078720197	715,9612427	0,118709907	715,9621582	0,096613936	715,9621582	0,115499154	715,9621582	0,106325716	715,9612427	0,182292268	715,9519043	0,051516011	715,9519043	0,062166281	715,9519043	0,050741863
715,9870605	0,254953951	715,986145	0,141445428	715,9768066	0,090197928	715,9768066	0,153407097	715,986145	0,098122209	715,9870605	0,105160378	715,9870605	0,147993594	715,9870605	0,119194336	715,986145	0,205973804	715,9768066	0,083887212	715,9768066	0,123970635	715,9768066	0,099515215
716,0119629	0,35238865	716,0111084	0,147819906	716,001709	0,082080208	716,001709	0,19050853	716,0111084	0,097217545	716,0119629	0,087961577	716,0119629	0,148188412	716,0119629	0,106423713	716,0111084	0,295767576	716,001709	0,070627205	716,001709	0,143775389	716,001709	0,089456551
716,0368652	0,597218812	716,0360107	0,266084105	716,0266113	0,100195542	716,0266113	0,267144293	716,0360107	0,162193328	716,0368652	0,102000594	716,0368652	0,182172805	716,0368652	0,121335417	716,0360107	0,513895035	716,0266113	0,071114607	716,0266113	0,161443248	716,0266113	0,095067486
716,0617676	1,04430902	716,0609131	0,318981349	716,0515137	0,165981993	716,0515137	0,381641924	716,0609131	0,186852738	716,0617676	0,180534884	716,0617676	0,369654	716,0617676	0,218071714	716,0609131	0,598324955	716,0515137	0,122456878	716,0515137	0,232620686	716,0515137	0,168375045
716,0866699	1,242037892	716,0858154	0,291099936	716,076416	0,202122673	716,076416	0,387251943	716,0858154	0,174114197	716,0866699	0,266562492	716,0866699	0,584784985	716,0866699	0,300525814	716,0858154	0,540799439	716,076416	0,146203816	716,076416	0,253869534	716,076416	0,210160628
716,1115723	1,04231441	716,1107178	0,306212783	716,1013184	0,197731763	716,1013184	0,294922233	716,1107178	0,231552929	716,1115723	0,401288837	716,1115723	0,755455375	716,1115723	0,400594622	716,1107178	0,471542448	716,1013184	0,156009242	716,1013184	0,184306249	716,1013184	0,195253864
716,1364746	0,787192643	716,1356201	0,304825813	716,1262207	0,214924425	716,1262207	0,261521608	716,1356201	0,251386017	716,1364746	0,583729565	716,1364746	0,849204779	716,1364746	0,518543124	716,1356201	0,400096208	716,1262207	0,197297826	716,1262207	0,169811338	716,1262207	0,200151086
716,161377	0,549686849	716,1605225	0,204879954	716,151123	0,199755922	716,151123	0,244400561	716,1605225	0,188037619	716,161377	0,594774425	716,161377	0,72000128	716,161377	0,485592097	716,1605225	0,262655288	716,151123	0,208175942	716,151123	0,176024362	716,151123	0,208318144
716,1862793	0,352608353	716,1854248	0,173585355	716,1760254	0,141385391	716,1760254	0,150100186	716,1854248	0,173139364	716,1862793	0,490368098	716,1862793	0,509837687	716,1862793	0,374344915	716,1854248	0,208016202	716,1760254	0,157137245	716,1760254	0,108370334	716,1760254	0,139057025
716,2111816	0,305925101	716,2103271	0,193934992	716,2009277	0,12876147	716,2009277	0,128680363	716,2103271	0,180608809	716,2111816	0,413893044	716,2111816	0,411405176	716,2111816	0,325820148	716,2103271	0,220031917	716,2009277	0,143368706	716,2009277	0,093658209	716,2009277	0,120359883
716,236145	0,26701954	716,2352295	0,131240904	716,2258301	0,128205001	716,2258301	0,156131387	716,2352295	0,12228027	716,236145	0,315823168	716,236145	0,332851708	716,236145	0,258854836	716,2352295	0,156686053	716,2258301	0,146196216	716,2258301	0,126400322	716,2258301	0,135280326
716,2610474	0,18870464	716,2601318	0,11032442	716,2507324	0,087668791	716,2507324	0,114623912	716,2601318	0,10381338	716,2610474	0,217841014	716,2610474	0,223379001	716,2610474	0,181298152	716,2601318	0,141351089	716,2507324	0,099919051	716,2507324	0,095110662	716,2507324	0,093802586
716,2859497	0,2161569	716,2850342	0,162416652	716,2756348	0,091733918	716,2756348	0,12140888	716,2850342	0,137594759	716,2859497	0,209809929	716,2859497	0,22084628	716,2859497	0,177353814	716,2850342	0,212966517	716,2756348	0,087363936	716,2756348	0,093128532	716,2756348	0,083922103
716,3108521	0,239455745	716,3099365	0,156985685	716,3005371	0,129977956	716,3005371	0,207108125	716,3099365	0,114826843	716,3108521	0,183576748	716,3108521	0,220945463	716,3108521	0,17544888	716,3099365	0,217603818	716,3005371	0,117874771	716,3005371	0,159956455	716,3005371	0,140171304
716,3357544	0,211756632	716,3348389	0,168235272	716,3254395	0,136034712	716,3254395	0,210895613	716,3348389	0,110855803	716,3357544	0,137425154	716,3357544	0,174892664	716,3357544	0,132965565	716,3348389	0,249235094	716,3254395	0,110027261	716,3254395	0,168902755	716,3254395	0,140354216
716,3606567	0,266925752	716,3597412	0,298785686	716,3504028	0,162136689	716,3504028	0,226973012	716,3597412	0,187126338	716,3606567	0,168697327	716,3606567	0,21737285	716,3606567	0,170131609	716,3597412	0,429697394	716,3504028	0,122742854	716,3504028	0,177180588	716,3504028	0,153289005
716,3855591	0,353768826	716,3846436	0,445102423	716,3753052	0,230375752	716,3753052	0,345587522	716,3846436	0,237287953	716,3855591	0,184205711	716,3855591	0,261439502	716,3855591	0,217525914	716,3846436	0,653218091	716,3753052	0,187604591	716,3753052	0,304916769	716,3753052	0,235808149
716,4104614	0,41832301	716,4095459	0,689958632	716,4002075	0,276112974	716,4002075	0,474983633	716,4095459	0,336383611	716,4104614	0,17230992	716,4104614	0,260395318	716,4104614	0,22850734	716,4095459	1,007174492	716,4002075	0,219054371	716,4002075	0,452339917	716,4002075	0,28200376
716,4353638	0,585593462	716,4344482	1,153694868	716,4251099	0,405094117	716,4251099	0,68534565	716,4344482	0,600265145	716,4353638	0,220637456	716,4353638	0,353733063	716,4353638	0,311757296	716,4344482	1,555340052	716,4251099	0,2737571	716,4251099	0,63423717	716,4251099	0,376904994
716,4602661	0,842746973	716,4593506	1,596159816	716,4500122	0,660944343	716,4500122	0,999485552	716,4593506	0,929966629	716,4602661	0,305043846	716,4602661	0,535699904	716,4602661	0,451168716	716,4593506	1,950736165	716,4500122	0,452469856	716,4500122	0,898049533	716,4500122	0,609392524
716,4851685	1,107989073	716,4842529	1,77453208	716,4749146	0,911372185	716,4749146	1,115843534	716,4842529	1,168773293	716,4851685	0,416363895	716,4851685	0,82751435	716,4851685	0,681969047	716,4842529	1,995123267	716,4749146	0,664666533	716,4749146	0,987032652	716,4749146	0,828341186
716,5100708	1,127183914	716,5091553	1,838398099	716,4998169	1,025263667	716,4998169	0,997378826	716,5091553	1,411281586	716,5100708	0,56956774	716,5100708	1,111198306	716,5100708	0,966298461	716,5091553	1,874362826	716,4998169	0,80279839	716,4998169	0,867240071	716,4998169	0,886203229
716,5349731	0,957110643	716,5340576	1,715617895	716,5247192	1,068387628	716,5247192	0,843445897	716,5340576	1,589368343	716,5349731	0,819825411	716,5349731	1,365074515	716,5349731	1,283766985	716,5340576	1,539202809	716,5247192	0,942359686	716,5247192	0,715221405	716,5247192	0,912071288
716,5598755	0,684681416	716,55896	1,318420887	716,5496216	0,947911143	716,5496216	0,611294746	716,55896	1,460765719	716,5598755	0,951888978	716,5598755	1,315526724	716,5598755	1,356505513	716,55896	1,048423052	716,5496216	0,979559004	716,5496216	0,528514445	716,5496216	0,819455624
716,5847778	0,418872446	716,5838623	0,933588624	716,5745239	0,666378915	716,5745239	0,360826492	716,5838623	1,208530188	716,5847778	0,874299049	716,5847778	0,991966963	716,5847778	1,163499951	716,5838623	0,682933986	716,5745239	0,79055512	716,5745239	0,312434971	716,5745239	0,57245636
716,6096802	0,292362064	716,6087646	0,691538692	716,5994263	0,448010981	716,5994263	0,226431862	716,6087646	0,954351425	716,6096802	0,73058331	716,6096802	0,729281485	716,6096802	0,928111851	716,6087646	0,505117714	716,5994263	0,581827581	716,5994263	0,187972501	716,5994263	0,373163909
716,6345825	0,225168586	716,633667	0,452970773	716,6243286	0,316446215	716,6243286	0,196750075	716,633667	0,670138359	716,6345825	0,557059824	716,6345825	0,523678124	716,6345825	0,678748012	716,633667	0,321293473	716,6243286	0,429187298	716,6243286	0,17474632	716,6243286	0,286172092
716,6594849	0,137850568	716,6585693	0,291109651	716,649231	0,192936733	716,649231	0,127920151	716,6585693	0,452507138	716,6594849	0,367851645	716,6594849	0,319739193	716,6594849	0,435154915	716,6585693	0,208676293	716,649231	0,272162378	716,649231	0,118240111	716,649231	0,181865975
716,6843872	0,147183046	716,6834717	0,259139657	716,6741333	0,132552758	716,6741333	0,094125181	716,6834717	0,362905115	716,6843872	0,288365811	716,6843872	0,256899834	716,6843872	0,330852419	716,6834717	0,212337852	716,6741333	0,176236495	716,6741333	0,075435869	716,6741333	0,113464922
716,7092896	0,148774341	716,7084351	0,19385983	716,6990356	0,136797622	716,6990356	0,128450334	716,7084351	0,254751325	716,7092896	0,210803598	716,7092896	0,222178444	716,7092896	0,260531783	716,7084351	0,163187534	716,6990356	0,162312254	716,6990356	0,111439057	716,6990356	0,131465435
716,7341919	0,091990903	716,7333374	0,126914993	716,723938	0,098561816	716,723938	0,092615277	716,7333374	0,175289854	716,7341919	0,129315928	716,7341919	0,145235687	716,7341919	0,162008718	716,7333374	0,106587104	716,723938	0,118782327	716,723938	0,090330429	716,723938	0,104957536
716,7590942	0,096045814	716,7582397	0,144120857	716,7488403	0,071653076	716,7488403	0,054921675	716,7582397	0,171231791	716,7590942	0,131845444	716,7590942	0,125615239	716,7590942	0,148100108	716,7582397	0,137959003	716,7488403	0,082911775	716,7488403	0,051619504	716,7488403	0,063112445
716,7839966	0,116149396	716,7831421	0,13395682	716,7737427	0,084952161	716,7737427	0,087719455	716,7831421	0,142419621	716,7839966	0,124600686	716,7839966	0,144227982	716,7839966	0,146070585	716,7831421	0,124923579	716,7737427	0,097094744	716,7737427	0,076774947	716,7737427	0,088175207
716,8088989	0,067184597	716,8080444	0,085531957	716,798645	0,068367049	716,798645	0,075012296	716,8080444	0,094711192	716,8088989	0,076896004	716,8088989	0,086167127	716,8088989	0,087240227	716,8080444	0,073731542	716,798645	0,08265201	716,798645	0,077299871	716,798645	0,0781831
716,8338013	0,063221313	716,8329468	0,117539383	716,8235474	0,048605248	716,8235474	0,041434832	716,8329468	0,115768872	716,8338013	0,081419311	716,8338013	0,074220851	716,8338013	0,087405168	716,8329468	0,107561655	716,8235474	0,052046157	716,8235474	0,040768351	716,8235474	0,042635269
716,8587036	0,101758517	716,8578491	0,122907802	716,8484497	0,06930951	716,8484497	0,074158505	716,8578491	0,108652048	716,8587036	0,098426677	716,8587036	0,114937931	716,8587036	0,112532087	716,8578491	0,113948092	716,8484497	0,072535455	716,8484497	0,069942974	716,8484497	0,066905446
716,883606	0,090973102	716,8827515	0,077844366	716,8733521	0,063735634	716,8733521	0,080332048	716,8827515	0,072161973	716,883606	0,076455258	716,883606	0,103944354	716,883606	0,093530163	716,8827515	0,074138746	716,8733521	0,070251077	716,8733521	0,085823856	716,8733521	0,073601417
716,9085083	0,058560397	716,9076538	0,092051238	716,8982544	0,045593955	716,8982544	0,0486742	716,9076538	0,088628843	716,9085083	0,049302921	716,9085083	0,062443033	716,9085083	0,065645471	716,9076538	0,096127801	716,8982544	0,046763785	716,8982544	0,05054542	716,8982544	0,038702562
716,9334106	0,093485408	716,9325562	0,134349719	716,9231567	0,061392993	716,9231567	0,070425473	716,9325562	0,115972593	716,9334106	0,074733257	716,9334106	0,083523013	716,9334106	0,082490154	716,9325562	0,135558397	716,9231567	0,05967154	716,9231567	0,060654908	716,9231567	0,055075917
716,958374	0,120705247	716,9574585	0,111886591	716,9481201	0,077606529	716,9481201	0,109008819	716,9574585	0,092020944	716,958374	0,077078409	716,958374	0,107081018	716,958374	0,089081205	716,9574585	0,117499858	716,9481201	0,077284664	716,9481201	0,099035241	716,9481201	0,086742871
716,9832764	0,107513823	716,9823608	0,093076035	716,9730225	0,059880987	716,9730225	0,095171839	716,9823608	0,079388022	716,9832764	0,057311106	716,9832764	0,072106101	716,9832764	0,067706816	716,9823608	0,110902108	716,9730225	0,061826956	716,9730225	0,087946862	716,9730225	0,071300037
717,0081787	0,200864241	717,0072632	0,151491314	716,9979248	0,062824368	716,9979248	0,118191801	717,0072632	0,118984327	717,0081787	0,086025819	717,0081787	0,110488519	717,0081787	0,101270959	717,0072632	0,203310594	716,9979248	0,055030771	716,9979248	0,079760045	716,9979248	0,057058994
717,0330811	0,374329686	717,0321655	0,159875274	717,0228271	0,110794261	717,0228271	0,236902565	717,0321655	0,112313345	717,0330811	0,103603132	717,0330811	0,168813735	717,0330811	0,125295594	717,0321655	0,242014199	717,0228271	0,093244791	717,0228271	0,155556574	717,0228271	0,112229466
717,0579834	0,485587746	717,0570679	0,13777414	717,0477295	0,123692833	717,0477295	0,287531972	717,0570679	0,097343013	717,0579834	0,095218569	717,0579834	0,196344733	717,0579834	0,112208784	717,0570679	0,242085308	717,0477295	0,098733887	717,0477295	0,179583758	717,0477295	0,128789321
717,0828857	0,577694952	717,0819702	0,194397599	717,0726318	0,148079306	717,0726318	0,272897273	717,0819702	0,146906152	717,0828857	0,173005819	717,0828857	0,30863598	717,0828857	0,178611994	717,0819702	0,296186298	717,0726318	0,106319636	717,0726318	0,152138323	717,0726318	0,135123387
717,1077881	0,552616	717,1068726	0,188390762	717,0975342	0,199547857	717,0975342	0,295986801	717,1068726	0,147517174	717,1077881	0,257994056	717,1077881	0,430541575	717,1077881	0,254304647	717,1068726	0,263944924	717,0975342	0,162326247	717,0975342	0,18209894	717,0975342	0,190499976
717,1326904	0,40457347	717,1317749	0,131837964	717,1224365	0,181708217	717,1224365	0,248772591	717,1317749	0,113420792	717,1326904	0,274789214	717,1326904	0,401526421	717,1326904	0,239886478	717,1317749	0,173580781	717,1224365	0,178528026	717,1224365	0,170442581	717,1224365	0,185753614
717,1575928	0,319750637	717,1566772	0,149580285	717,1473389	0,142452031	717,1473389	0,163927227	717,1566772	0,136488393	717,1575928	0,297906041	717,1575928	0,35894835	717,1575928	0,249765545	717,1566772	0,18341656	717,1473389	0,151260346	717,1473389	0,110915542	717,1473389	0,137281656
717,1824951	0,29033941	717,1815796	0,141972974	717,1722412	0,154054925	717,1722412	0,167833194	717,1815796	0,128278553	717,1824951	0,296319932	717,1824951	0,348397881	717,1824951	0,253317267	717,1815796	0,166060328	717,1722412	0,167188823	717,1722412	0,119883791	717,1722412	0,151707724
717,2073975	0,197008014	717,2064819	0,085882321	717,1971436	0,128772631	717,1971436	0,142043248	717,2064819	0,084742166	717,2073975	0,216143712	717,2073975	0,256073922	717,2073975	0,186894253	717,2064819	0,103672035	717,1971436	0,150832623	717,1971436	0,117268912	717,1971436	0,134746641
717,2322998	0,153515697	717,2313843	0,10908132	717,2220459	0,083850086	717,2220459	0,086860225	717,2313843	0,104276896	717,2322998	0,18852216	717,2322998	0,179090172	717,2322998	0,153855518	717,2313843	0,129393086	717,2220459	0,101472251	717,2220459	0,070976272	717,2220459	0,076850772
717,2572021	0,181428149	717,2562866	0,127230376	717,2469482	0,093649715	717,2469482	0,121672019	717,2562866	0,10675215	717,2572021	0,191863954	717,2572021	0,203018993	717,2572021	0,165041372	717,2562866	0,15054369	717,2469482	0,109543905	717,2469482	0,096222185	717,2469482	0,095960096
717,2821045	0,16725871	717,281189	0,090604521	717,2718506	0,098644614	717,2718506	0,146867394	717,281189	0,069975071	717,2821045	0,148285523	717,2821045	0,171810657	717,2821045	0,140742421	717,281189	0,116331197	717,2718506	0,106244512	717,2718506	0,126772866	717,2718506	0,109759994
717,3070068	0,133345172	717,3060913	0,135741457	717,2967529	0,087978035	717,2967529	0,120507993	717,3060913	0,100309201	717,3070068	0,113204978	717,3070068	0,128940776	717,3070068	0,101732373	717,3060913	0,185874641	717,2967529	0,077165596	717,2967529	0,10171105	717,2967529	0,083097078
717,3319092	0,172251999	717,3309937	0,196389884	717,3216553	0,13203384	717,3216553	0,183061391	717,3309937	0,129101157	717,3319092	0,124942869	717,3319092	0,146900132	717,3319092	0,12328954	717,3309937	0,270340979	717,3216553	0,105376996	717,3216553	0,144363493	717,3216553	0,123397656
717,3568115	0,226375714	717,355896	0,243165895	717,3465576	0,15940164	717,3465576	0,240259737	717,355896	0,135610804	717,3568115	0,13583447	717,3568115	0,186220765	717,3568115	0,142883331	717,355896	0,354445964	717,3465576	0,129090741	717,3465576	0,210706457	717,3465576	0,166370481
717,3817139	0,236460045	717,3807983	0,36897397	717,37146	0,170635611	717,37146	0,297944576	717,3807983	0,172579378	717,3817139	0,104424581	717,3817139	0,163622111	717,3817139	0,123290442	717,3807983	0,589147866	717,37146	0,137011513	717,37146	0,273100376	717,37146	0,177824095
717,4066162	0,390782952	717,4057617	0,741874099	717,3963623	0,234828234	717,3963623	0,464172393	717,4057617	0,34759891	717,4066162	0,15766193	717,4066162	0,227694899	717,4066162	0,200676069	717,4057617	1,125422955	717,3963623	0,159151509	717,3963623	0,421207845	717,3963623	0,217411131
717,4315186	0,664158165	717,4306641	1,227283835	717,4212646	0,444586903	717,4212646	0,873640239	717,4306641	0,602175117	717,4315186	0,215419099	717,4315186	0,390679449	717,4315186	0,332262605	717,4306641	1,746183157	717,4212646	0,278726399	717,4212646	0,747625589	717,4212646	0,417389363
717,4564209	0,895294428	717,4555664	1,682043791	717,446167	0,758668661	717,446167	1,283755302	717,4555664	0,944306076	717,4564209	0,274865419	717,4564209	0,556070268	717,4564209	0,484785587	717,4555664	2,169706106	717,446167	0,450229973	717,446167	1,044436336	717,446167	0,703057468
717,4813232	1,035442472	717,4804688	2,022335529	717,4710693	1,120552063	717,4710693	1,366546392	717,4804688	1,386991024	717,4813232	0,465627968	717,4813232	0,820366859	717,4813232	0,781232238	717,4804688	2,254649401	717,4710693	0,698883474	717,4710693	1,054718137	717,4710693	0,986156464
717,5062256	0,993040323	717,5053711	1,964751363	717,4959717	1,355533838	717,4959717	1,170613885	717,5053711	1,667459249	717,5062256	0,706186831	717,5062256	1,082034469	717,5062256	1,10155642	717,5053711	1,886978626	717,4959717	1,00464344	717,4959717	0,905823946	717,4959717	1,18593812
717,5311279	0,705043614	717,5302734	1,566877604	717,520874	1,211510897	717,520874	0,81899333	717,5302734	1,642771959	717,5311279	0,837815464	717,5311279	1,081346035	717,5311279	1,206886292	717,5302734	1,319164872	717,520874	1,115413547	717,520874	0,657372773	717,520874	1,069445372
717,5560303	0,454489231	717,5551758	1,182202101	717,5458374	0,881087303	717,5458374	0,484590083	717,5551758	1,452141404	717,5560303	0,869275689	717,5560303	0,913030803	717,5560303	1,153000951	717,5551758	0,913570166	717,5458374	0,964340508	717,5458374	0,387462378	717,5458374	0,761611879
717,5809326	0,343094289	717,5800781	0,844775379	717,5707397	0,618542671	717,5707397	0,332218617	717,5800781	1,142855048	717,5809326	0,789356589	717,5809326	0,733732939	717,5809326	0,979902983	717,5800781	0,615275502	717,5707397	0,749285579	717,5707397	0,26658231	717,5707397	0,540673256
717,605835	0,219335452	717,6049805	0,526194751	717,5956421	0,403044194	717,5956421	0,232767045	717,6049805	0,790706336	717,605835	0,584131062	717,605835	0,494784981	717,605835	0,704846263	717,6049805	0,357292295	717,5956421	0,527293682	717,5956421	0,20139882	717,5956421	0,368340522
717,6307373	0,129660711	717,6298828	0,376328468	717,6205444	0,235120654	717,6205444	0,135237753	717,6298828	0,582015753	717,6307373	0,414682746	717,6307373	0,315801144	717,6307373	0,487818539	717,6298828	0,268650383	717,6205444	0,326120675	717,6205444	0,112020224	717,6205444	0,209394053
717,6556396	0,13084881	717,6547852	0,296372682	717,6454468	0,187118948	717,6454468	0,131654143	717,6547852	0,428897649	717,6556396	0,32489723	717,6556396	0,2549707	717,6556396	0,375085533	717,6547852	0,224996865	717,6454468	0,238487884	717,6454468	0,104819499	717,6454468	0,165559754
717,680542	0,112956949	717,6796875	0,173602775	717,6703491	0,149405465	717,6703491	0,133505493	717,6796875	0,267481774	717,680542	0,218241826	717,680542	0,189571783	717,680542	0,25530678	717,6796875	0,131117687	717,6703491	0,180766568	717,6703491	0,122053847	717,6703491	0,148470148
717,7055054	0,074904844	717,7045898	0,153797418	717,6952515	0,08865533	717,6952515	0,077095084	717,7045898	0,216888875	717,7055054	0,139002085	717,7055054	0,115875266	717,7055054	0,16838491	717,7045898	0,125756234	717,6952515	0,110460624	717,6952515	0,0720497	717,6952515	0,084915362
717,7304077	0,09158355	717,7294922	0,171515509	717,7201538	0,099915057	717,7201538	0,090670586	717,7294922	0,194003105	717,7304077	0,141469896	717,7304077	0,121630453	717,7304077	0,160757944	717,7294922	0,152835727	717,7201538	0,106916599	717,7201538	0,074608527	717,7201538	0,08949808
717,7553101	0,114503719	717,7543945	0,123348825	717,7450562	0,105806164	717,7450562	0,106568135	717,7543945	0,143781647	717,7553101	0,130324647	717,7553101	0,144213527	717,7553101	0,154285997	717,7543945	0,110364705	717,7450562	0,112116978	717,7450562	0,099042274	717,7450562	0,107172854
717,7802124	0,066202946	717,7792969	0,092169002	717,7699585	0,074816406	717,7699585	0,073647164	717,7792969	0,111009948	717,7802124	0,080376856	717,7802124	0,089300372	717,7802124	0,097334564	717,7792969	0,080089994	717,7699585	0,085535757	717,7699585	0,068504147	717,7699585	0,078391977
717,8051147	0,066539779	717,8041992	0,120816357	717,7948608	0,058473103	717,7948608	0,050735857	717,8041992	0,128832608	717,8051147	0,087882765	717,8051147	0,082597427	717,8051147	0,09299583	717,8041992	0,112110727	717,7948608	0,063411742	717,7948608	0,045577865	717,7948608	0,051941574
717,8300171	0,100503556	717,8291016	0,126123413	717,8197632	0,077286981	717,8197632	0,07938686	717,8291016	0,117907621	717,8300171	0,103072405	717,8300171	0,114153184	717,8300171	0,11188364	717,8291016	0,117194779	717,8197632	0,078890413	717,8197632	0,071190231	717,8197632	0,080157414
717,8549194	0,058491755	717,8540039	0,080504358	717,8446655	0,068330102	717,8446655	0,080900997	717,8540039	0,078379132	717,8549194	0,061830789	717,8549194	0,074739501	717,8549194	0,074339256	717,8540039	0,074934736	717,8446655	0,072973073	717,8446655	0,083919987	717,8446655	0,080353856
717,8798218	0,054398376	717,8789063	0,1070906	717,8695679	0,049574919	717,8695679	0,050389558	717,8789063	0,100751944	717,8798218	0,062783569	717,8798218	0,059491783	717,8798218	0,069901817	717,8789063	0,106570914	717,8695679	0,047906149	717,8695679	0,047117952	717,8695679	0,046833649
717,9047241	0,099009655	717,9038086	0,125255004	717,8944702	0,070473842	717,8944702	0,076869227	717,9038086	0,112892762	717,9047241	0,086155526	717,9047241	0,09687379	717,9047241	0,104283236	717,9038086	0,128549159	717,8944702	0,068698928	717,8944702	0,068903208	717,8944702	0,072160348
717,9296265	0,083791971	717,9287109	0,084074959	717,9193726	0,069832295	717,9193726	0,090182163	717,9287109	0,074618161	717,9296265	0,060234353	717,9296265	0,072510116	717,9296265	0,076919153	717,9287109	0,085748993	717,9193726	0,07210651	717,9193726	0,088075288	717,9193726	0,087303981
717,9545288	0,081874169	717,9536133	0,108579583	717,9442749	0,045493633	717,9442749	0,05984319	717,9536133	0,098158143	717,9545288	0,05575059	717,9545288	0,05947141	717,9545288	0,062914349	717,9536133	0,118900202	717,9442749	0,04731521	717,9442749	0,05627865	717,9442749	0,050579526
717,9794312	0,155462429	717,9785156	0,144320697	717,9691772	0,073143862	717,9691772	0,102556534	717,9785156	0,117032543	717,9794312	0,086799487	717,9794312	0,112576656	717,9794312	0,102332227	717,9785156	0,167457581	717,9691772	0,066546537	717,9691772	0,083154164	717,9691772	0,073867932
718,0043335	0,213291243	718,003418	0,105381295	717,9940796	0,082959168	717,9940796	0,150920153	718,003418	0,077414721	718,0043335	0,076500908	718,0043335	0,120614395	718,0043335	0,092926852	718,003418	0,142959788	717,9940796	0,079796851	717,9940796	0,12166921	717,9940796	0,10152375
718,0292358	0,29167068	718,0283203	0,128139198	718,0189819	0,068587683	718,0189819	0,153713286	718,0283203	0,102238826	718,0292358	0,077329092	718,0292358	0,123693116	718,0292358	0,088291921	718,0283203	0,197449699	718,0189819	0,056751385	718,0189819	0,103789054	718,0189819	0,071670577
718,0541382	0,432535499	718,0532227	0,172433674	718,0438843	0,112942487	718,0438843	0,216997623	718,0532227	0,132436439	718,0541382	0,138000071	718,0541382	0,22486724	718,0541382	0,146203339	718,0532227	0,256852806	718,0438843	0,087644063	718,0438843	0,133961841	718,0438843	0,103540003
718,0790405	0,456675172	718,078186	0,12949419	718,0687866	0,14952068	718,0687866	0,257857502	718,078186	0,098921835	718,0790405	0,168538243	718,0790405	0,294035733	718,0790405	0,177079886	718,078186	0,190574527	718,0687866	0,125626698	718,0687866	0,172669664	718,0687866	0,158068061
718,1039429	0,359360456	718,1030884	0,128841966	718,093689	0,127313733	718,093689	0,19124487	718,1030884	0,105770275	718,1039429	0,168720752	718,1039429	0,298291802	718,1039429	0,17041032	718,1030884	0,177657306	718,093689	0,110933319	718,093689	0,127716124	718,093689	0,126662865
718,1288452	0,324640393	718,1279907	0,167300597	718,1185913	0,143254295	718,1185913	0,183994457	718,1279907	0,134595841	718,1288452	0,213383183	718,1288452	0,313967347	718,1288452	0,201604217	718,1279907	0,207770482	718,1185913	0,130850643	718,1185913	0,118451014	718,1185913	0,132624581
718,1537476	0,313518941	718,1528931	0,117929965	718,1435547	0,15704681	718,1435547	0,192820042	718,1528931	0,094895616	718,1537476	0,251801699	718,1537476	0,326531947	718,1537476	0,228025302	718,1528931	0,139146402	718,1435547	0,154277414	718,1435547	0,153798372	718,1435547	0,163575217
718,1786499	0,236245796	718,1777954	0,092091717	718,168457	0,124101907	718,168457	0,140148982	718,1777954	0,086435124	718,1786499	0,194579929	718,1786499	0,258366823	718,1786499	0,176593095	718,1777954	0,111164108	718,168457	0,128951877	718,168457	0,120084055	718,168457	0,132458702
718,2035522	0,181889147	718,2026978	0,115437217	718,1933594	0,097506069	718,1933594	0,095361441	718,2026978	0,10115926	718,2035522	0,174971342	718,2035522	0,206599683	718,2035522	0,156402558	718,2026978	0,13433139	718,1933594	0,108743481	718,1933594	0,079073913	718,1933594	0,094838411
718,2284546	0,199628413	718,2276001	0,125736445	718,2182617	0,107071906	718,2182617	0,117712162	718,2276001	0,106166154	718,2284546	0,180008918	718,2284546	0,219135761	718,2284546	0,174836278	718,2276001	0,142110243	718,2182617	0,116986074	718,2182617	0,091242746	718,2182617	0,106147669
718,2533569	0,15235649	718,2525024	0,086332835	718,2431641	0,095627047	718,2431641	0,129366472	718,2525024	0,068186618	718,2533569	0,123894818	718,2533569	0,182987094	718,2533569	0,128254697	718,2525024	0,099765003	718,2431641	0,10665869	718,2431641	0,116775841	718,2431641	0,116713509
718,2782593	0,125902265	718,2774048	0,118727356	718,2680664	0,073030226	718,2680664	0,099436723	718,2774048	0,096164741	718,2782593	0,102903284	718,2782593	0,128935695	718,2782593	0,103528954	718,2774048	0,139475346	718,2680664	0,072804533	718,2680664	0,077775277	718,2680664	0,075276203
718,3031616	0,172973722	718,3023071	0,167163819	718,2929688	0,106103398	718,2929688	0,149765283	718,3023071	0,118736863	718,3031616	0,138513893	718,3031616	0,162145644	718,3031616	0,135544732	718,3023071	0,205758214	718,2929688	0,09567026	718,2929688	0,121174306	718,2929688	0,104742616
718,328064	0,180762962	718,3272095	0,165422872	718,3178711	0,132326156	718,3178711	0,209649056	718,3272095	0,097065724	718,328064	0,101219349	718,328064	0,150589913	718,328064	0,116126336	718,3272095	0,224295676	718,3178711	0,117719114	718,3178711	0,18056947	718,3178711	0,145585716
718,3529663	0,186942726	718,3521118	0,286026478	718,3427734	0,131373659	718,3427734	0,218089059	718,3521118	0,157447606	718,3529663	0,092573918	718,3529663	0,131664246	718,3529663	0,105200559	718,3521118	0,40510577	718,3427734	0,100949295	718,3427734	0,193984926	718,3427734	0,134929404
718,3778687	0,306114703	718,3770142	0,527631938	718,3676758	0,209424332	718,3676758	0,339489967	718,3770142	0,26759553	718,3778687	0,140799016	718,3778687	0,208386198	718,3778687	0,17347315	718,3770142	0,70581001	718,3676758	0,156378672	718,3676758	0,301496834	718,3676758	0,205018163
718,402771	0,400613219	718,4019165	0,768865824	718,3925781	0,316529751	718,3925781	0,525574386	718,4019165	0,373136371	718,402771	0,163120404	718,402771	0,277391315	718,402771	0,238167942	718,4019165	0,988348961	718,3925781	0,234847367	718,3925781	0,486429155	718,3925781	0,321304977
718,4276733	0,501092374	718,4268188	1,115624785	718,4174805	0,42246145	718,4174805	0,664244175	718,4268188	0,619812608	718,4276733	0,197985619	718,4276733	0,345932364	718,4276733	0,329254061	718,4268188	1,33167851	718,4174805	0,301214844	718,4174805	0,598649859	718,4174805	0,41443029
718,4526367	0,658434331	718,4517212	1,451201439	718,4423828	0,611167789	718,4423828	0,831402779	718,4517212	0,940459967	718,4526367	0,328094453	718,4526367	0,53119427	718,4526367	0,528089046	718,4517212	1,574616313	718,4423828	0,454108745	718,4423828	0,696068823	718,4423828	0,581849575
718,4775391	0,724321246	718,4766235	1,517832994	718,4672852	0,801644146	718,4672852	0,892238259	718,4766235	1,147219539	718,4775391	0,436501533	718,4775391	0,685006022	718,4775391	0,721366525	718,4766235	1,471551895	718,4672852	0,64706552	718,4672852	0,73326993	718,4672852	0,754434645
718,5024414	0,613169968	718,5015259	1,388217092	718,4921875	0,821138203	718,4921875	0,693677545	718,5015259	1,264080524	718,5024414	0,514844358	718,5024414	0,741098523	718,5024414	0,830516458	718,5015259	1,188409686	718,4921875	0,737292707	718,4921875	0,569232762	718,4921875	0,755322516
718,5273438	0,508532763	718,5264282	1,178240061	718,5170898	0,729022324	718,5170898	0,471766204	718,5264282	1,256522179	718,5273438	0,595963299	718,5273438	0,769929945	718,5273438	0,911689579	718,5264282	0,910051048	718,5170898	0,750279069	718,5170898	0,378570199	718,5170898	0,661674798
718,5522461	0,425209552	718,5513306	0,83114332	718,5419922	0,564594269	718,5419922	0,344799012	718,5513306	1,037381411	718,5522461	0,647059739	718,5522461	0,762963653	718,5522461	0,927318096	718,5513306	0,58261472	718,5419922	0,683016121	718,5419922	0,289170325	718,5419922	0,532534122
718,5771484	0,276069045	718,5762329	0,588782847	718,5668945	0,361823618	718,5668945	0,197346315	718,5762329	0,827387512	718,5771484	0,571403742	718,5771484	0,58795315	718,5771484	0,771147609	718,5762329	0,37847966	718,5668945	0,497033954	718,5668945	0,17518501	718,5668945	0,345255464
718,6020508	0,162962914	718,6011353	0,467763364	718,5917969	0,240275875	718,5917969	0,122007042	718,6011353	0,679493308	718,6020508	0,461831957	718,6020508	0,406236976	718,6020508	0,583588839	718,6011353	0,312733054	718,5917969	0,350568742	718,5917969	0,102971472	718,5917969	0,216963008
718,6269531	0,161600769	718,6260376	0,351457089	718,6166992	0,198843792	718,6166992	0,125852466	718,6260376	0,505943477	718,6269531	0,375703573	718,6269531	0,323425323	718,6269531	0,453077912	718,6260376	0,243790746	718,6166992	0,285789937	718,6166992	0,106988154	718,6166992	0,181929797
718,6518555	0,120455153	718,6509399	0,202018857	718,6416016	0,144922435	718,6416016	0,126477644	718,6509399	0,315791309	718,6518555	0,251304239	718,6518555	0,218077093	718,6518555	0,307493269	718,6509399	0,134386107	718,6416016	0,206176162	718,6416016	0,116007164	718,6416016	0,153929606
718,6767578	0,070458263	718,6758423	0,161855355	718,6665039	0,081203543	718,6665039	0,06948974	718,6758423	0,242709428	718,6767578	0,158743098	718,6767578	0,128826141	718,6767578	0,194257274	718,6758423	0,120973349	718,6665039	0,116847016	718,6665039	0,065851621	718,6665039	0,080825314
718,7016602	0,094824858	718,7007446	0,164238557	718,6914063	0,086963415	718,6914063	0,078995153	718,7007446	0,209035441	718,7016602	0,152572513	718,7016602	0,127937481	718,7016602	0,175794005	718,7007446	0,138674885	718,6914063	0,104868487	718,6914063	0,067597926	718,6914063	0,078242198
718,7265625	0,091449954	718,725647	0,098253004	718,7163086	0,088875808	718,7163086	0,09966553	718,725647	0,128110558	718,7265625	0,107820779	718,7265625	0,122833051	718,7265625	0,131760553	718,725647	0,078993432	718,7163086	0,105347395	718,7163086	0,094442151	718,7163086	0,10183616
718,7514648	0,053431388	718,7505493	0,090524964	718,741272	0,051425885	718,741272	0,051205792	718,7505493	0,112393238	718,7514648	0,067305259	718,7514648	0,068515748	718,7514648	0,084613957	718,7505493	0,076909043	718,741272	0,06472484	718,741272	0,05538803	718,741272	0,054747537
718,7763672	0,077352285	718,7755127	0,122947522	718,7661743	0,057524618	718,7661743	0,054079358	718,7755127	0,126999155	718,7763672	0,088461503	718,7763672	0,089365512	718,7763672	0,101498023	718,7755127	0,112333447	718,7661743	0,067322627	718,7661743	0,05022065	718,7661743	0,053100988
718,8012695	0,082178459	718,800415	0,078014448	718,7910767	0,072199821	718,7910767	0,084638081	718,800415	0,082913108	718,8012695	0,077858783	718,8012695	0,091705784	718,8012695	0,092492923	718,800415	0,067647375	718,7910767	0,081159711	718,7910767	0,084470943	718,7910767	0,08271119
718,8261719	0,050672017	718,8253174	0,065369241	718,815979	0,039280832	718,815979	0,051523082	718,8253174	0,067791231	718,8261719	0,050355945	718,8261719	0,052201074	718,8261719	0,057900116	718,8253174	0,057409022	718,815979	0,050163917	718,815979	0,052199442	718,815979	0,049233269
718,8510742	0,070358224	718,8502197	0,106336698	718,8408813	0,044202272	718,8408813	0,044016484	718,8502197	0,101245001	718,8510742	0,065154947	718,8510742	0,071210064	718,8510742	0,077175148	718,8502197	0,100392148	718,8408813	0,04449508	718,8408813	0,039851498	718,8408813	0,039124802
718,8759766	0,082513563	718,8751221	0,081909627	718,8657837	0,066280417	718,8657837	0,079568692	718,8751221	0,075615257	718,8759766	0,068377562	718,8759766	0,082982063	718,8759766	0,082765423	718,8751221	0,07733541	718,8657837	0,066616356	718,8657837	0,076501779	718,8657837	0,074314661
718,9008789	0,046924956	718,9000244	0,059809562	718,890686	0,048111252	718,890686	0,05811213	718,9000244	0,057599142	718,9008789	0,040372778	718,9008789	0,050682347	718,9008789	0,051120427	718,9000244	0,060476441	718,890686	0,049347173	718,890686	0,062048215	718,890686	0,05178136
718,9257813	0,070597082	718,9249268	0,105956547	718,9155884	0,038591918	718,9155884	0,047483381	718,9249268	0,094206259	718,9257813	0,054706678	718,9257813	0,060747869	718,9257813	0,067778632	718,9249268	0,120706312	718,9155884	0,040426932	718,9155884	0,045375139	718,9155884	0,038412884
718,9506836	0,118807822	718,9498291	0,102597304	718,9404907	0,066728748	718,9404907	0,100395806	718,9498291	0,079284191	718,9506836	0,068061039	718,9506836	0,09390866	718,9506836	0,086835012	718,9498291	0,136873677	718,9404907	0,064986929	718,9404907	0,091286339	718,9404907	0,075721234
718,9755859	0,158959284	718,9747314	0,088349022	718,9653931	0,057904821	718,9653931	0,119497627	718,9747314	0,063233599	718,9755859	0,057838432	718,9755859	0,086849645	718,9755859	0,071380123	718,9747314	0,167550027	718,9653931	0,056141749	718,9653931	0,105549522	718,9653931	0,069806337
719,0004883	0,259623319	718,9996338	0,144191548	718,9902954	0,055095378	718,9902954	0,12226744	718,9996338	0,09883219	719,0004883	0,053888142	719,0004883	0,096678838	719,0004883	0,065835439	718,9996338	0,280325681	718,9902954	0,043227091	718,9902954	0,08447136	718,9902954	0,049265917
719,0253906	0,5509727	719,0245361	0,20535472	719,0151978	0,094423011	719,0151978	0,229336888	719,0245361	0,126032844	719,0253906	0,106991507	719,0253906	0,214173838	719,0253906	0,125880137	719,0245361	0,393718988	719,0151978	0,070265628	719,0151978	0,144667506	719,0151978	0,088495262
719,050293	0,846966565	719,0494385	0,198444784	719,0401001	0,146598563	719,0401001	0,366822481	719,0494385	0,11148648	719,050293	0,160452411	719,050293	0,362089217	719,050293	0,175338924	719,0494385	0,431301802	719,0401001	0,112457193	719,0401001	0,242365465	719,0401001	0,159380302
719,0751953	1,003657699	719,0743408	0,234594047	719,0650024	0,169634104	719,0650024	0,386562288	719,0743408	0,153311342	719,0751953	0,234700575	719,0751953	0,507124662	719,0751953	0,240197778	719,0743408	0,447274178	719,0650024	0,118435606	719,0650024	0,234907731	719,0650024	0,171790749
719,1000977	0,948539913	719,0992432	0,279316723	719,0899048	0,224587679	719,0899048	0,362827718	719,0992432	0,209620669	719,1000977	0,402072996	719,1000977	0,722654819	719,1000977	0,377200544	719,0992432	0,435344368	719,0899048	0,173319176	719,0899048	0,215086311	719,0899048	0,214725435
719,125	0,708902717	719,1241455	0,20206672	719,1148071	0,244169235	719,1148071	0,332807481	719,1241455	0,171248734	719,125	0,498016149	719,125	0,774923801	719,125	0,449315369	719,1241455	0,285599232	719,1148071	0,229629785	719,1148071	0,223259166	719,1148071	0,258368164
719,1499023	0,460781485	719,1490479	0,149598405	719,1397095	0,186334968	719,1397095	0,219565451	719,1490479	0,150999144	719,1499023	0,494452059	719,1499023	0,636351764	719,1499023	0,404739946	719,1490479	0,197424591	719,1397095	0,202095687	719,1397095	0,150219694	719,1397095	0,191104025
719,1748657	0,369937152	719,1739502	0,173324853	719,1646118	0,156169772	719,1646118	0,160337687	719,1739502	0,166377172	719,1748657	0,470065027	719,1748657	0,510598719	719,1748657	0,365019709	719,1739502	0,207230613	719,1646118	0,176387355	719,1646118	0,103566378	719,1646118	0,144259915
719,1997681	0,294130564	719,1988525	0,122532144	719,1895142	0,151577398	719,1895142	0,168024182	719,1988525	0,116141371	719,1997681	0,368163437	719,1997681	0,398734748	719,1997681	0,300663412	719,1988525	0,149197146	719,1895142	0,177969277	719,1895142	0,127441123	719,1895142	0,158900186
719,2246704	0,184329078	719,2237549	0,08208175	719,2144165	0,100545734	719,2144165	0,115562186	719,2237549	0,083104149	719,2246704	0,245490849	719,2246704	0,257271945	719,2246704	0,200437188	719,2237549	0,105712406	719,2144165	0,127835646	719,2144165	0,1012263	719,2144165	0,110557631
719,2495728	0,18455258	719,2486572	0,126822785	719,2393188	0,081171662	719,2393188	0,091708079	719,2486572	0,108284235	719,2495728	0,217671365	719,2495728	0,224454001	719,2495728	0,178924799	719,2486572	0,149704516	719,2393188	0,095149897	719,2393188	0,070949383	719,2393188	0,07532756
719,2744751	0,181789696	719,2735596	0,120591871	719,2642212	0,106344551	719,2642212	0,146748275	719,2735596	0,094685875	719,2744751	0,181227863	719,2744751	0,223214015	719,2744751	0,159455344	719,2735596	0,146728903	719,2642212	0,110609122	719,2642212	0,116443232	719,2642212	0,11632935
719,2993774	0,128816143	719,2984619	0,106265418	719,2891235	0,095230862	719,2891235	0,141356274	719,2984619	0,077546626	719,2993774	0,116928272	719,2993774	0,14811486	719,2993774	0,108726077	719,2984619	0,152164325	719,2891235	0,094094619	719,2891235	0,12859568	719,2891235	0,105844781
719,3242798	0,147330448	719,3233643	0,21193704	719,3140259	0,095645815	719,3140259	0,157736689	719,3233643	0,130784899	719,3242798	0,117844723	719,3242798	0,137935996	719,3242798	0,113145746	719,3233643	0,312398702	719,3140259	0,08011023	719,3140259	0,137194782	719,3140259	0,090155996
719,3491821	0,207036301	719,3482666	0,359326065	719,3389893	0,163542852	719,3389893	0,288196206	719,3482666	0,176740631	719,3491821	0,136512727	719,3491821	0,166895166	719,3491821	0,133103326	719,3482666	0,508191645	719,3389893	0,127731636	719,3389893	0,258744806	719,3389893	0,163871899
719,3740845	0,268621206	719,3731689	0,537273347	719,3638916	0,232530177	719,3638916	0,411872715	719,3731689	0,253461123	719,3740845	0,121563651	719,3740845	0,190895975	719,3740845	0,152359545	719,3731689	0,718883812	719,3638916	0,16635327	719,3638916	0,391935766	719,3638916	0,245627254
719,3989868	0,318898052	719,3980713	0,760159612	719,3887939	0,291646332	719,3887939	0,466475934	719,3980713	0,394320428	719,3989868	0,119815379	719,3989868	0,202034682	719,3989868	0,176302597	719,3980713	0,935882509	719,3887939	0,194871813	719,3887939	0,445805758	719,3887939	0,28292191
719,4238892	0,438400954	719,4229736	0,986458838	719,4136963	0,414337099	719,4136963	0,566704154	719,4229736	0,589103639	719,4238892	0,203892127	719,4238892	0,339768916	719,4238892	0,314396352	719,4229736	1,121793985	719,4136963	0,299749076	719,4136963	0,522559106	719,4136963	0,400456548
719,4487915	0,500778258	719,447876	1,121120334	719,4385986	0,558225572	719,4385986	0,660543323	719,447876	0,767488778	719,4487915	0,268767983	719,4487915	0,450910896	719,4487915	0,443772525	719,447876	1,155143738	719,4385986	0,460180491	719,4385986	0,596332788	719,4385986	0,550966859
719,4736938	0,484524369	719,4728394	1,150001287	719,463501	0,592477143	719,463501	0,586999595	719,4728394	0,92251873	719,4736938	0,328513145	719,4736938	0,479043752	719,4736938	0,546849728	719,4728394	1,075657606	719,463501	0,548191667	719,463501	0,528398097	719,463501	0,572182298
719,4985962	0,471697837	719,4977417	1,112187862	719,4884033	0,599797964	719,4884033	0,483776331	719,4977417	1,029226661	719,4985962	0,435882002	719,4985962	0,560015559	719,4985962	0,677357137	719,4977417	0,95282191	719,4884033	0,599345565	719,4884033	0,413152307	719,4884033	0,556098163
719,5234985	0,402271718	719,522644	0,885764182	719,5133057	0,546912134	719,5133057	0,398311943	719,522644	0,949005663	719,5234985	0,472336084	719,5234985	0,587882161	719,5234985	0,708384931	719,522644	0,689320982	719,5133057	0,613568723	719,5133057	0,343076169	719,5133057	0,522758722
719,5484009	0,26223895	719,5475464	0,635811985	719,538208	0,392879039	719,538208	0,253445923	719,5475464	0,790546238	719,5484009	0,424263358	719,5484009	0,480014145	719,5484009	0,63113451	719,5475464	0,443069875	719,538208	0,508324683	719,538208	0,226646617	719,538208	0,383871168
719,5733032	0,207658514	719,5724487	0,501487315	719,5631104	0,265250683	719,5631104	0,153134003	719,5724487	0,662668288	719,5733032	0,409656376	719,5733032	0,398576319	719,5733032	0,553477764	719,5724487	0,348920971	719,5631104	0,376709431	719,5631104	0,127428725	719,5631104	0,24798435
719,5982056	0,170421317	719,5973511	0,336140215	719,5880127	0,20520936	719,5880127	0,148068964	719,5973511	0,481039673	719,5982056	0,339156091	719,5982056	0,319344163	719,5982056	0,44001618	719,5973511	0,228669822	719,5880127	0,296466142	719,5880127	0,128449276	719,5880127	0,207892314
719,6231079	0,087819003	719,6222534	0,199305922	719,612915	0,12732172	719,612915	0,101969823	719,6222534	0,318761647	719,6231079	0,216177315	719,6231079	0,191440597	719,6231079	0,286961585	719,6222534	0,124628194	719,612915	0,19579716	719,612915	0,100847229	719,612915	0,139609039
719,6480103	0,082945876	719,6471558	0,183280602	719,6378174	0,082459122	719,6378174	0,063160591	719,6471558	0,254094303	719,6480103	0,182201624	719,6480103	0,148746446	719,6480103	0,219200954	719,6471558	0,13487494	719,6378174	0,122174472	719,6378174	0,053546607	719,6378174	0,079374395
719,6729126	0,106746033	719,6720581	0,148542985	719,6627197	0,093066938	719,6627197	0,09651313	719,6720581	0,188329428	719,6729126	0,147134736	719,6729126	0,147458434	719,6729126	0,179258302	719,6720581	0,112804048	719,6627197	0,115723521	719,6627197	0,079987317	719,6627197	0,094308063
719,6978149	0,061114483	719,6969604	0,083300881	719,6876221	0,074907966	719,6876221	0,087393649	719,6969604	0,117351733	719,6978149	0,079218902	719,6978149	0,080650285	719,6978149	0,104470119	719,6969604	0,065362811	719,6876221	0,092839099	719,6876221	0,083960354	719,6876221	0,087139554
719,7227173	0,062704675	719,7218628	0,100783974	719,7125244	0,052959062	719,7125244	0,04904712	719,7218628	0,121140622	719,7227173	0,080482878	719,7227173	0,07588385	719,7227173	0,092364959	719,7218628	0,090994738	719,7125244	0,063244231	719,7125244	0,044511553	719,7125244	0,049987972
719,7476196	0,072661638	719,7467651	0,102691859	719,7374268	0,072097577	719,7374268	0,075068526	719,7467651	0,108151965	719,7476196	0,095377304	719,7476196	0,089488275	719,7476196	0,097473703	719,7467651	0,09176527	719,7374268	0,080338001	719,7374268	0,066963695	719,7374268	0,07173267
719,772522	0,07349655	719,7716675	0,057128035	719,7623291	0,056590285	719,7623291	0,068657435	719,7716675	0,06477543	719,772522	0,079845369	719,772522	0,092855886	719,772522	0,085197367	719,7716675	0,047260627	719,7623291	0,070483558	719,7623291	0,068264462	719,7623291	0,06902732
719,7974243	0,041756447	719,7965698	0,06838201	719,7872314	0,040484786	719,7872314	0,039381456	719,7965698	0,074751928	719,7974243	0,046004012	719,7974243	0,052286223	719,7974243	0,053160679	719,7965698	0,062170677	719,7872314	0,047414679	719,7872314	0,044449784	719,7872314	0,04212147
719,8223267	0,060315721	719,8214722	0,093477115	719,8121338	0,037212197	719,8121338	0,038057569	719,8214722	0,091797799	719,8223267	0,07225465	719,8223267	0,063992009	719,8223267	0,070753627	719,8214722	0,089463249	719,8121338	0,042215675	719,8121338	0,036675122	719,8121338	0,034635894
719,847229	0,073966183	719,8463745	0,070302978	719,8370361	0,059916638	719,8370361	0,073392086	719,8463745	0,062926143	719,847229	0,06415651	719,847229	0,079624765	719,847229	0,072403148	719,8463745	0,062465504	719,8370361	0,063488767	719,8370361	0,071114033	719,8370361	0,068737715
719,8721313	0,0493313	719,8712769	0,049990728	719,8619385	0,037655793	719,8619385	0,050345473	719,8712769	0,048614513	719,8721313	0,037894376	719,8721313	0,044666961	719,8721313	0,044419266	719,8712769	0,047671583	719,8619385	0,044602133	719,8619385	0,053134076	719,8619385	0,04693317
719,8970337	0,071898192	719,8961792	0,087180652	719,8868408	0,034163523	719,8868408	0,036573675	719,8961792	0,080020368	719,8970337	0,059582572	719,8970337	0,063912623	719,8970337	0,066297174	719,8961792	0,091328949	719,8868408	0,035799928	719,8868408	0,034478698	719,8868408	0,030984225
719,9219971	0,104558982	719,9210815	0,078218721	719,9117432	0,057328001	719,9117432	0,081449896	719,9210815	0,065532558	719,9219971	0,068998396	719,9219971	0,085874252	719,9219971	0,073687293	719,9210815	0,091191262	719,9117432	0,057790969	719,9117432	0,071669616	719,9117432	0,060980711
719,9468994	0,099713884	719,9459839	0,056749307	719,9367065	0,047655221	719,9367065	0,080902062	719,9459839	0,047200486	719,9468994	0,035866443	719,9468994	0,050630312	719,9468994	0,049955714	719,9459839	0,09503752	719,9367065	0,048244141	719,9367065	0,078303508	719,9367065	0,057683736
719,9718018	0,220924035	719,9708862	0,123239964	719,9616089	0,043302186	719,9616089	0,096848458	719,9708862	0,083423443	719,9718018	0,060009073	719,9718018	0,090173528	719,9718018	0,07114099	719,9708862	0,241023451	719,9616089	0,03664716	719,9616089	0,068206705	719,9616089	0,041338731
719,9967041	0,551106215	719,9957886	0,182946131	719,9865112	0,089890487	719,9865112	0,227783144	719,9957886	0,091224469	719,9967041	0,098478764	719,9967041	0,18751578	719,9967041	0,104855061	719,9957886	0,448571384	719,9865112	0,06791307	719,9865112	0,156986669	719,9865112	0,094036095
720,0216064	1,104972243	720,0206909	0,247867718	720,0114136	0,127166495	720,0114136	0,385406345	720,0206909	0,099833407	720,0216064	0,104545414	720,0216064	0,305449098	720,0216064	0,117979199	720,0206909	0,70405668	720,0114136	0,088655137	720,0114136	0,260286629	720,0114136	0,13782227
720,0465088	1,929638624	720,0455933	0,425550967	720,0363159	0,191017836	720,0363159	0,581449032	720,0455933	0,202483401	720,0465088	0,243880808	720,0465088	0,649787068	720,0465088	0,25649327	720,0455933	1,035764456	720,0363159	0,106613651	720,0363159	0,360428005	720,0363159	0,180843562
720,0714111	2,57241106	720,0704956	0,544282436	720,0612183	0,329000086	720,0612183	0,780719876	720,0704956	0,29050234	720,0714111	0,515539527	720,0714111	1,187116742	720,0714111	0,517089665	720,0704956	1,130923986	720,0612183	0,202531964	720,0612183	0,488681048	720,0612183	0,321565062
720,0963135	2,393066168	720,0953979	0,513460338	720,0861206	0,413079739	720,0861206	0,712967575	720,0953979	0,332019418	720,0963135	0,817997396	720,0963135	1,633492589	720,0963135	0,755699933	720,0953979	0,92478323	720,0861206	0,300052583	720,0861206	0,460557073	720,0861206	0,425441176
720,1212158	1,879172564	720,1203003	0,476045817	720,1110229	0,389336109	720,1110229	0,491831303	720,1203003	0,384880841	720,1212158	1,065752506	720,1212158	1,798689365	720,1212158	0,935229719	720,1203003	0,712029934	720,1110229	0,342731565	720,1110229	0,310645342	720,1110229	0,389115572
720,1461182	1,432219386	720,1452026	0,384588748	720,1359253	0,344285965	720,1359253	0,377434134	720,1452026	0,361891776	720,1461182	1,242367744	720,1461182	1,797278643	720,1461182	1,054888129	720,1452026	0,51274085	720,1359253	0,367428631	720,1359253	0,243834645	720,1359253	0,345693767
720,1710205	0,955965877	720,170166	0,238405704	720,1608276	0,259849012	720,1608276	0,275299698	720,170166	0,255052179	720,1710205	1,223462939	720,1710205	1,476537943	720,1710205	0,984010339	720,170166	0,310301661	720,1608276	0,311988086	720,1608276	0,197743878	720,1608276	0,274756819
720,1959229	0,607708693	720,1950684	0,192490861	720,18573	0,188593417	720,18573	0,181282058	720,1950684	0,220800877	720,1959229	0,961790979	720,1959229	1,002980113	720,1959229	0,74047786	720,1950684	0,248968646	720,18573	0,238669515	720,18573	0,13262713	720,18573	0,185565218
720,2208252	0,455814898	720,2199707	0,195132986	720,2106323	0,145781502	720,2106323	0,143193901	720,2199707	0,208624914	720,2208252	0,741645217	720,2208252	0,717401385	720,2208252	0,564754844	720,2199707	0,254153818	720,2106323	0,187607184	720,2106323	0,095990866	720,2106323	0,140944749
720,2457275	0,383101344	720,244873	0,154833212	720,2355347	0,143693492	720,2355347	0,16782698	720,244873	0,147359625	720,2457275	0,539705276	720,2457275	0,533939421	720,2457275	0,413069516	720,244873	0,205960125	720,2355347	0,168772697	720,2355347	0,128808215	720,2355347	0,143422246
720,2706299	0,276875228	720,2697754	0,107585922	720,260437	0,104903184	720,260437	0,14354229	720,2697754	0,100389592	720,2706299	0,355120003	720,2706299	0,35142833	720,2706299	0,27068609	720,2697754	0,166406989	720,260437	0,125673294	720,260437	0,118765786	720,260437	0,11484912
720,2955322	0,265326828	720,2946777	0,165466726	720,2853394	0,090411432	720,2853394	0,129797861	720,2946777	0,125899494	720,2955322	0,285613805	720,2955322	0,291970193	720,2955322	0,229010105	720,2946777	0,250230253	720,2853394	0,09186089	720,2853394	0,095601514	720,2853394	0,084169537
720,3204346	0,324905485	720,3195801	0,215700731	720,3102417	0,130475283	720,3102417	0,218979672	720,3195801	0,131642252	720,3204346	0,244733289	720,3204346	0,288653851	720,3204346	0,21768488	720,3195801	0,336283922	720,3102417	0,119031034	720,3102417	0,166679487	720,3102417	0,132927239
720,3453369	0,319240838	720,3444824	0,270843893	720,335144	0,156961158	720,335144	0,287083358	720,3444824	0,138747141	720,3453369	0,179533944	720,3453369	0,248685241	720,3453369	0,175224513	720,3444824	0,445546985	720,335144	0,125959441	720,335144	0,243955359	720,335144	0,168748379
720,3702393	0,377425164	720,3693848	0,49502492	720,3600464	0,202635571	720,3600464	0,356322169	720,3693848	0,254649729	720,3702393	0,20925279	720,3702393	0,271304756	720,3702393	0,218889147	720,3693848	0,712997079	720,3600464	0,136754483	720,3600464	0,298022956	720,3600464	0,193470433
720,3951416	0,496556252	720,3942871	0,751624286	720,3849487	0,325207502	720,3849487	0,508947968	720,3942871	0,400132477	720,3951416	0,25603649	720,3951416	0,383658856	720,3951416	0,304367721	720,3942871	0,951866746	720,3849487	0,22861509	720,3849487	0,44651866	720,3849487	0,316496164
720,4200439	0,516625226	720,4191895	0,944505751	720,4098511	0,434066534	720,4098511	0,598447561	720,4191895	0,559961557	720,4200439	0,265936285	720,4200439	0,418812603	720,4200439	0,364124328	720,4191895	1,058120608	720,4098511	0,330228627	720,4098511	0,525823176	720,4098511	0,431565672
720,4449463	0,560192406	720,4440918	1,120114446	720,4347534	0,516050339	720,4347534	0,564738989	720,4440918	0,79872942	720,4449463	0,335194796	720,4449463	0,504285872	720,4449463	0,491915166	720,4440918	1,117834091	720,4347534	0,419973016	720,4347534	0,488953918	720,4347534	0,477697521
720,4698486	0,605050027	720,4689941	1,128933668	720,4596558	0,578978539	720,4596558	0,522908866	720,4689941	0,953760982	720,4698486	0,445257217	720,4698486	0,63376832	720,4698486	0,663781464	720,4689941	1,014543414	720,4596558	0,542440951	720,4596558	0,446931094	720,4596558	0,54071641
720,494751	0,485552698	720,4938965	0,949988782	720,4845581	0,527855992	720,4845581	0,415993243	720,4938965	0,941461146	720,494751	0,484704942	720,494751	0,647256315	720,494751	0,707476497	720,4938965	0,756918907	720,4845581	0,575894117	720,4845581	0,368292928	720,4845581	0,512194455
720,5196533	0,358784854	720,5187988	0,783999443	720,5094604	0,398074448	720,5094604	0,256149381	720,5187988	0,889243424	720,5196533	0,478251725	720,5196533	0,58464241	720,5196533	0,694364786	720,5187988	0,588105917	720,5094604	0,49669686	720,5094604	0,22924687	720,5094604	0,37501514
720,5445557	0,311600834	720,5437012	0,615808129	720,5344238	0,317205548	720,5344238	0,201938957	720,5437012	0,757978201	720,5445557	0,493888557	720,5445557	0,558462501	720,5445557	0,685330153	720,5437012	0,443495274	720,5344238	0,427454114	720,5344238	0,175459176	720,5344238	0,300059915
720,569458	0,252087146	720,5686035	0,397286922	720,5593262	0,234213278	720,5593262	0,162983209	720,5686035	0,548085868	720,569458	0,44216007	720,569458	0,459357232	720,569458	0,586443365	720,5686035	0,256387174	720,5593262	0,332589835	720,5593262	0,153123796	720,5593262	0,233870983
720,5943604	0,149117693	720,5935059	0,299969107	720,5842285	0,152930692	720,5842285	0,09842214	720,5935059	0,447255671	720,5943604	0,316533267	720,5943604	0,309880465	720,5943604	0,416906863	720,5935059	0,19762519	720,5842285	0,237816706	720,5842285	0,098190367	720,5842285	0,154062569
720,6192627	0,120926671	720,6184082	0,262461007	720,6091309	0,109685451	720,6091309	0,066122115	720,6184082	0,382179856	720,6192627	0,26310271	720,6192627	0,222098336	720,6192627	0,32511124	720,6184082	0,187392652	720,6091309	0,176223129	720,6091309	0,062804192	720,6091309	0,10234952
720,6442261	0,139938042	720,6433105	0,192004219	720,6340332	0,107709363	720,6340332	0,097974062	720,6433105	0,277150691	720,6442261	0,213660166	720,6442261	0,201693699	720,6442261	0,25783509	720,6433105	0,145544648	720,6340332	0,149610773	720,6340332	0,082779959	720,6340332	0,10673596
720,6691284	0,080602869	720,6682129	0,10914591	720,6589355	0,077433147	720,6589355	0,090441264	720,6682129	0,164596334	720,6691284	0,119891927	720,6691284	0,117289111	720,6691284	0,147750348	720,6682129	0,082397074	720,6589355	0,108603694	720,6589355	0,085088298	720,6589355	0,088660881
720,6940308	0,083755717	720,6931152	0,117770046	720,6838379	0,054491099	720,6838379	0,0535887	720,6931152	0,15301235	720,6940308	0,106753431	720,6940308	0,099401459	720,6940308	0,122155234	720,6931152	0,108398549	720,6838379	0,068737507	720,6838379	0,045944709	720,6838379	0,053694215
720,7189331	0,123605326	720,7180176	0,115366451	720,7087402	0,076265655	720,7087402	0,082654111	720,7180176	0,124554791	720,7189331	0,113409154	720,7189331	0,122450709	720,7189331	0,124945492	720,7180176	0,107512213	720,7087402	0,083878957	720,7087402	0,067179993	720,7087402	0,075591147
720,7438354	0,090981342	720,7429199	0,064123027	720,7336426	0,065500215	720,7336426	0,076312952	720,7429199	0,0736738	720,7438354	0,068740129	720,7438354	0,083787762	720,7438354	0,084926121	720,7429199	0,05893822	720,7336426	0,074624494	720,7336426	0,074034467	720,7336426	0,076204881
720,7687378	0,072048984	720,7678223	0,083603248	720,7585449	0,04005954	720,7585449	0,035912093	720,7678223	0,086188875	720,7687378	0,06441614	720,7687378	0,066707686	720,7687378	0,068874426	720,7678223	0,076795377	720,7585449	0,046339586	720,7585449	0,037272125	720,7585449	0,039024651
720,7936401	0,102733634	720,7927246	0,091576099	720,7834473	0,055193357	720,7834473	0,057986528	720,7927246	0,087604448	720,7936401	0,09380585	720,7936401	0,111808926	720,7936401	0,097842813	720,7927246	0,091041587	720,7834473	0,06038617	720,7834473	0,054479778	720,7834473	0,053191714
720,8185425	0,078995444	720,817627	0,053480852	720,8083496	0,047001034	720,8083496	0,063978866	720,817627	0,051952336	720,8185425	0,062658302	720,8185425	0,081525266	720,8185425	0,068443112	720,817627	0,050843708	720,8083496	0,059356581	720,8083496	0,070858508	720,8083496	0,061091747
720,8434448	0,060637955	720,8425903	0,071003363	720,833252	0,028801579	720,833252	0,033111691	720,8425903	0,067682482	720,8434448	0,050128382	720,8434448	0,063230075	720,8434448	0,052774772	720,8425903	0,072284907	720,833252	0,033948224	720,833252	0,03654569	720,833252	0,031542055
720,8683472	0,104220137	720,8674927	0,092139296	720,8581543	0,048158586	720,8581543	0,055725202	720,8674927	0,076552786	720,8683472	0,079153486	720,8683472	0,096182108	720,8683472	0,08385995	720,8674927	0,101351663	720,8581543	0,049230874	720,8581543	0,052546881	720,8581543	0,047734834
720,8932495	0,108857498	720,892395	0,053725012	720,8830566	0,05352959	720,8830566	0,080922998	720,892395	0,042423956	720,8932495	0,059207793	720,8932495	0,086515926	720,8932495	0,069572911	720,892395	0,069645926	720,8830566	0,060272068	720,8830566	0,086618789	720,8830566	0,068401702
720,9181519	0,101010077	720,9172974	0,069805555	720,907959	0,036460288	720,907959	0,057256881	720,9172974	0,059884109	720,9181519	0,04471422	720,9181519	0,065083615	720,9181519	0,050995298	720,9172974	0,103302442	720,907959	0,035038799	720,907959	0,048249975	720,907959	0,036326762
720,9430542	0,159240872	720,9421997	0,126089796	720,9328613	0,056650113	720,9328613	0,103035115	720,9421997	0,084962495	720,9430542	0,07070785	720,9430542	0,092864804	720,9430542	0,070391349	720,9421997	0,20655337	720,9328613	0,050461147	720,9328613	0,079032511	720,9328613	0,052749634
720,9679565	0,309585094	720,9671021	0,124244988	720,9577637	0,083448939	720,9577637	0,218204945	720,9671021	0,069025964	720,9679565	0,091655307	720,9679565	0,146501437	720,9679565	0,10155341	720,9671021	0,285900205	720,9577637	0,070791475	720,9577637	0,156880528	720,9577637	0,096888132
720,9928589	0,620341301	720,9920044	0,155713379	720,982666	0,087808631	720,982666	0,295942545	720,9920044	0,064836763	720,9928589	0,07329762	720,9928589	0,177107722	720,9928589	0,090913184	720,9920044	0,502355874	720,982666	0,062468868	720,982666	0,194813222	720,982666	0,098819114
721,0177612	1,497930169	721,0169067	0,368800253	721,0075684	0,134771034	721,0075684	0,493939817	721,0169067	0,144515604	721,0177612	0,151353374	721,0177612	0,358457595	721,0177612	0,160490006	721,0169067	1,130972266	721,0075684	0,071707658	721,0075684	0,297184199	721,0075684	0,123585224
721,0426636	3,27439332	721,0418091	0,689398348	721,0324707	0,295568854	721,0324707	1,033519626	721,0418091	0,261334956	721,0426636	0,32740137	721,0426636	0,874634385	721,0426636	0,349694341	721,0418091	1,996913552	721,0324707	0,158260629	721,0324707	0,640956283	721,0324707	0,280912995
721,0675659	5,516792297	721,0667114	1,04588604	721,057373	0,522776723	721,057373	1,755128503	721,0667114	0,416588694	721,0675659	0,659180462	721,0675659	1,778353095	721,0675659	0,677162766	721,0667114	2,736260891	721,057373	0,275166839	721,057373	1,123286009	721,057373	0,513642073
721,0924683	6,945476055	721,0916138	1,402865887	721,0822754	0,829307973	721,0822754	2,104985237	721,0916138	0,699961543	721,0924683	1,33697772	721,0924683	3,189789295	721,0924683	1,312325954	721,0916138	2,978447676	721,0822754	0,460465908	721,0822754	1,346598268	721,0822754	0,810446978
721,1173706	6,306597233	721,1165161	1,470716715	721,1071777	1,106654882	721,1071777	1,824638247	721,1165161	0,932554483	721,1173706	2,309176683	721,1173706	4,647004128	721,1173706	2,159589767	721,1165161	2,513682604	721,1071777	0,769854784	721,1071777	1,176443338	721,1071777	1,120837331
721,1422729	4,440009594	721,1414185	1,195698619	721,1320801	1,064445019	721,1320801	1,246042252	721,1414185	0,966010392	721,1422729	3,140412331	721,1422729	5,091511726	721,1422729	2,763148546	721,1414185	1,745785475	721,1320801	0,977629662	721,1320801	0,832086086	721,1320801	1,108682036
721,1671753	2,800270081	721,1663208	0,904436827	721,1570435	0,776375592	721,1570435	0,747123301	721,1663208	0,887564063	721,1671753	3,399496555	721,1671753	4,362679482	721,1671753	2,786245823	721,1663208	1,19236207	721,1570435	0,894023955	721,1570435	0,491756499	721,1570435	0,799022079
721,1920776	1,838051081	721,1912231	0,666777611	721,1819458	0,549177229	721,1819458	0,494632334	721,1912231	0,71016562	721,1920776	2,989798546	721,1920776	3,240287304	721,1920776	2,334203959	721,1912231	0,832169235	721,1819458	0,707619131	721,1819458	0,324528188	721,1819458	0,558233321
721,21698	1,219998002	721,2161255	0,421919733	721,2068481	0,372912645	721,2068481	0,370036423	721,2161255	0,487080783	721,21698	2,226118326	721,21698	2,183947325	721,21698	1,682987452	721,2161255	0,548563659	721,2068481	0,503085434	721,2068481	0,262955338	721,2068481	0,395513296
721,2418823	0,864596725	721,2410278	0,329925686	721,2317505	0,233956739	721,2317505	0,245099291	721,2410278	0,374515206	721,2418823	1,54571712	721,2418823	1,423449159	721,2418823	1,151629448	721,2410278	0,44902724	721,2317505	0,315293729	721,2317505	0,173804507	721,2317505	0,244138598
721,2667847	0,732819796	721,2659302	0,316431105	721,2566528	0,199845657	721,2566528	0,242700592	721,2659302	0,307405412	721,2667847	1,101722598	721,2667847	1,038224697	721,2667847	0,833785594	721,2659302	0,435172945	721,2566528	0,240430966	721,2566528	0,172361776	721,2566528	0,202713028
721,291687	0,662180662	721,2908325	0,248908639	721,2815552	0,194463536	721,2815552	0,268796593	721,2908325	0,216779411	721,291687	0,858711302	721,291687	0,862565398	721,291687	0,660972834	721,2908325	0,375684977	721,2815552	0,210004747	721,2815552	0,213348731	721,2815552	0,211655512
721,3165894	0,56556344	721,3157349	0,28200528	721,3064575	0,161210537	721,3064575	0,258583933	721,3157349	0,208924338	721,3165894	0,645455837	721,3165894	0,672944009	721,3165894	0,499702245	721,3157349	0,451536626	721,3064575	0,154431775	721,3064575	0,203037575	721,3064575	0,167169794
721,3414917	0,559659004	721,3406372	0,429162562	721,3313599	0,209534273	721,3313599	0,391487807	721,3406372	0,267293751	721,3414917	0,512147248	721,3414917	0,56592977	721,3414917	0,417124212	721,3406372	0,671405077	721,3313599	0,1676296	721,3313599	0,295198977	721,3313599	0,202260256
721,366394	0,64434427	721,3655396	0,521039426	721,3562622	0,295014203	721,3562622	0,599752784	721,3655396	0,28550142	721,366394	0,460809886	721,366394	0,567576349	721,366394	0,405136734	721,3655396	0,827539563	721,3562622	0,21661815	721,3562622	0,442642659	721,3562622	0,295359462
721,3913574	0,705536544	721,3904419	0,688559771	721,3811646	0,396677881	721,3811646	0,807949722	721,3904419	0,357444644	721,3913574	0,386813343	721,3913574	0,520886838	721,3913574	0,380718321	721,3904419	1,026843429	721,3811646	0,263125002	721,3811646	0,575350881	721,3811646	0,396278799
721,4162598	0,819629133	721,4153442	1,07354188	721,4060669	0,602055669	721,4060669	0,973824441	721,4153442	0,585817337	721,4162598	0,408907205	721,4162598	0,570779502	721,4162598	0,440383136	721,4153442	1,40316546	721,4060669	0,371461004	721,4060669	0,674816966	721,4060669	0,556724846
721,4411621	0,954434395	721,4402466	1,518669367	721,4309692	0,846771598	721,4309692	1,089856029	721,4402466	0,887130976	721,4411621	0,515599489	721,4411621	0,732177496	721,4411621	0,602175474	721,4402466	1,708278656	721,4309692	0,593282521	721,4309692	0,793173969	721,4309692	0,789137423
721,4660645	0,968292415	721,4651489	1,847165942	721,4558716	0,95944196	721,4558716	1,077265024	721,4651489	1,22999084	721,4660645	0,593524992	721,4660645	0,839189112	721,4660645	0,754675031	721,4651489	1,763695955	721,4558716	0,788175285	721,4558716	0,840223908	721,4558716	0,916562319
721,4909668	0,898641646	721,4900513	2,019288301	721,4807739	0,954274535	721,4807739	0,885911644	721,4900513	1,640694022	721,4909668	0,705591977	721,4909668	0,923408628	721,4909668	0,95229882	721,4900513	1,630904913	721,4807739	0,888154745	721,4807739	0,700022101	721,4807739	0,906517267
721,5158691	0,809031665	721,5149536	1,870633602	721,5056763	0,893786848	721,5056763	0,676136136	721,5149536	1,849842429	721,5158691	0,853185177	721,5158691	1,041896343	721,5158691	1,173033595	721,5149536	1,315741658	721,5056763	0,970436037	721,5056763	0,542762816	721,5056763	0,854740381
721,5407715	0,615220785	721,539917	1,412297606	721,5305786	0,704293072	721,5305786	0,474533021	721,539917	1,720022559	721,5407715	0,871485531	721,5407715	0,961034179	721,5407715	1,213281155	721,539917	0,895292819	721,5305786	0,920891404	721,5305786	0,398982286	721,5305786	0,69859308
721,5656738	0,424534917	721,5648193	1,023404837	721,555481	0,464723647	721,555481	0,271746784	721,5648193	1,441703796	721,5656738	0,788668454	721,5656738	0,746110201	721,5656738	1,056397676	721,5648193	0,628426075	721,555481	0,702660143	721,555481	0,229788288	721,555481	0,452459067
721,5905762	0,36746332	721,5897217	0,747686207	721,5803833	0,333067328	721,5803833	0,205270335	721,5897217	1,110999584	721,5905762	0,687733352	721,5905762	0,609446645	721,5905762	0,855765343	721,5897217	0,473381072	721,5803833	0,521040678	721,5803833	0,15959014	721,5803833	0,323103487
721,6154785	0,287116349	721,614624	0,46524173	721,6052856	0,244791731	721,6052856	0,188598424	721,614624	0,761294544	721,6154785	0,518592596	721,6154785	0,462623179	721,6154785	0,633554876	721,614624	0,291666359	721,6052856	0,379447311	721,6052856	0,158654571	721,6052856	0,248112455
721,6403809	0,20805259	721,6395264	0,327768594	721,630188	0,145078808	721,630188	0,110906877	721,6395264	0,546154201	721,6403809	0,36845535	721,6403809	0,31673947	721,6403809	0,430924207	721,6395264	0,223680601	721,630188	0,232163012	721,630188	0,094289541	721,630188	0,144575253
721,6652832	0,224922121	721,6644287	0,287097216	721,6550903	0,121930405	721,6550903	0,110556953	721,6644287	0,416984409	721,6652832	0,312643766	721,6652832	0,281838268	721,6652832	0,34119457	721,6644287	0,234038204	721,6550903	0,169872016	721,6550903	0,086327627	721,6550903	0,117901251
721,6901855	0,247865841	721,6893311	0,191086799	721,6799927	0,124613971	721,6799927	0,147233173	721,6893311	0,272315294	721,6901855	0,266819894	721,6901855	0,271982193	721,6901855	0,289875895	721,6893311	0,167375922	721,6799927	0,156673998	721,6799927	0,121983483	721,6799927	0,137385502
721,7150879	0,208033845	721,7142334	0,14346157	721,704895	0,088039711	721,704895	0,101716124	721,7142334	0,202423185	721,7150879	0,186528355	721,7150879	0,208131254	721,7150879	0,209373027	721,7142334	0,147633925	721,704895	0,102301285	721,704895	0,082897194	721,704895	0,088889629
721,7399902	0,192719981	721,7391357	0,181003526	721,7297974	0,081058174	721,7297974	0,089528196	721,7391357	0,211912811	721,7399902	0,165832564	721,7399902	0,176318705	721,7399902	0,168882236	721,7391357	0,192731962	721,7297974	0,089192241	721,7297974	0,067408279	721,7297974	0,07419505
721,7648926	0,239435688	721,7640381	0,165102348	721,7547607	0,110332549	721,7547607	0,123299427	721,7640381	0,179713324	721,7648926	0,181584656	721,7648926	0,2263228	721,7648926	0,182768911	721,7640381	0,17175664	721,7547607	0,112314485	721,7547607	0,107252926	721,7547607	0,107357405
721,7897949	0,176081225	721,7889404	0,102056973	721,7796631	0,09083797	721,7796631	0,099025331	721,7889404	0,117700666	721,7897949	0,133314654	721,7897949	0,191986695	721,7897949	0,148000196	721,7889404	0,102638766	721,7796631	0,095298134	721,7796631	0,100739114	721,7796631	0,101841524
721,8146973	0,125607356	721,8138428	0,113043226	721,8045654	0,05656201	721,8045654	0,057346459	721,8138428	0,123694956	721,8146973	0,124668725	721,8146973	0,14624311	721,8146973	0,122946545	721,8138428	0,119017571	721,8045654	0,060295317	721,8045654	0,052429408	721,8045654	0,052205045
721,8395996	0,164733067	721,8387451	0,128964514	721,8294678	0,072419316	721,8294678	0,078928612	721,8387451	0,128087804	721,8395996	0,145578951	721,8395996	0,181923538	721,8395996	0,146683037	721,8387451	0,140378177	721,8294678	0,073647223	721,8294678	0,063174203	721,8294678	0,066761382
721,864502	0,145730034	721,8636475	0,078764983	721,8543701	0,074041203	721,8543701	0,097565003	721,8636475	0,077973865	721,864502	0,116214752	721,864502	0,14319095	721,864502	0,115408398	721,8636475	0,089138508	721,8543701	0,076979406	721,8543701	0,09356945	721,8543701	0,085668698
721,8894043	0,109268293	721,8885498	0,091823444	721,8792725	0,04346282	721,8792725	0,059726611	721,8885498	0,088853888	721,8894043	0,087111138	721,8894043	0,110741638	721,8894043	0,081946298	721,8885498	0,106238998	721,8792725	0,046529345	721,8792725	0,057215303	721,8792725	0,047089297
721,9143066	0,166916534	721,9134521	0,129758179	721,9041748	0,06158961	721,9041748	0,082739383	721,9134521	0,109630443	721,9143066	0,116173469	721,9143066	0,147827938	721,9143066	0,111376852	721,9134521	0,155085951	721,9041748	0,059211507	721,9041748	0,067776978	721,9041748	0,059350189
721,939209	0,204993591	721,9383545	0,094563335	721,9290771	0,081364408	721,9290771	0,134849146	721,9383545	0,07148812	721,939209	0,103441648	721,939209	0,150398389	721,939209	0,106311575	721,9383545	0,137826309	721,9290771	0,076310769	721,9290771	0,112193629	721,9290771	0,09177275
721,9641113	0,286891043	721,9632568	0,126832932	721,9539795	0,061032753	721,9539795	0,13783139	721,9632568	0,085439548	721,9641113	0,086749591	721,9641113	0,136102706	721,9641113	0,090534046	721,9632568	0,248099253	721,9539795	0,051251255	721,9539795	0,103082515	721,9539795	0,063138403
721,9890137	0,66130501	721,9881592	0,241832376	721,9788818	0,100751147	721,9788818	0,279170305	721,9881592	0,133185983	721,9890137	0,13703835	721,9890137	0,228924125	721,9890137	0,137650505	721,9881592	0,522094905	721,9788818	0,069467939	721,9788818	0,169416353	721,9788818	0,091032028
722,013916	1,361503005	722,0130615	0,328255296	722,0037842	0,187866703	722,0037842	0,54757905	722,0130615	0,147660106	722,013916	0,184096023	722,013916	0,40768373	722,013916	0,195826009	722,0130615	0,824122071	722,0037842	0,117707774	722,0037842	0,335500568	722,0037842	0,191975191
722,0388184	2,270733118	722,0379639	0,480913818	722,0286865	0,273024142	722,0286865	0,783854902	722,0379639	0,227359384	722,0388184	0,289269269	722,0388184	0,718671262	722,0388184	0,309090108	722,0379639	1,186062217	722,0286865	0,146349147	722,0286865	0,463351965	722,0286865	0,260139108
722,0637207	2,949905157	722,0628662	0,689494371	722,0535889	0,425631553	722,0535889	1,007839441	722,0628662	0,375501662	722,0637207	0,503679454	722,0637207	1,155763984	722,0637207	0,506744564	722,0628662	1,488763928	722,0535889	0,242923737	722,0535889	0,591789722	722,0535889	0,389412522
722,088623	3,40261364	722,0877686	0,745914698	722,0784912	0,586053431	722,0784912	1,100096226	722,0877686	0,452472448	722,088623	0,821151733	722,088623	1,673220158	722,088623	0,782684207	722,0877686	1,430723667	722,0784912	0,398022205	722,0784912	0,684010446	722,0784912	0,563008189
722,1135254	3,220775127	722,1126709	0,686082423	722,1033936	0,597444475	722,1033936	0,879543602	722,1126709	0,492746055	722,1135254	1,212549686	722,1135254	2,223727465	722,1135254	1,093730807	722,1126709	1,14499557	722,1033936	0,475316435	722,1033936	0,563149095	722,1033936	0,59940809
722,1384888	2,458415747	722,1375732	0,663445771	722,1282959	0,551211178	722,1282959	0,672643781	722,1375732	0,545491815	722,1384888	1,554532528	722,1384888	2,445244789	722,1384888	1,327024698	722,1375732	0,967297852	722,1282959	0,493821174	722,1282959	0,416970968	722,1282959	0,537379384
722,1633911	1,743454456	722,1624756	0,577469528	722,1531982	0,50249511	722,1531982	0,554565132	722,1624756	0,514986813	722,1633911	1,74433136	722,1633911	2,294738531	722,1633911	1,419926286	722,1624756	0,777511477	722,1531982	0,511328161	722,1531982	0,35540998	722,1531982	0,498376101
722,1882935	1,186653018	722,1873779	0,39295429	722,1781006	0,392424643	722,1781006	0,417247415	722,1873779	0,394464731	722,1882935	1,568409801	722,1882935	1,803952217	722,1882935	1,225111961	722,1873779	0,524738908	722,1781006	0,446560204	722,1781006	0,284364104	722,1781006	0,404497474
722,2131958	0,82674861	722,2122803	0,316025704	722,2030029	0,260333806	722,2030029	0,267721772	722,2122803	0,328326344	722,2131958	1,237748265	722,2131958	1,259220123	722,2131958	0,931411505	722,2122803	0,42122665	722,2030029	0,319297522	722,2030029	0,181432664	722,2030029	0,260121495
722,2380981	0,693703532	722,2372437	0,306474745	722,2279053	0,220835105	722,2279053	0,230072811	722,2372437	0,290397048	722,2380981	0,952648461	722,2380981	0,945793033	722,2380981	0,73326695	722,2372437	0,39880836	722,2279053	0,257414907	722,2279053	0,156982139	722,2279053	0,212415963
722,2630005	0,580494881	722,262146	0,223150373	722,2528076	0,193085462	722,2528076	0,235058382	722,262146	0,203398347	722,2630005	0,699034274	722,2630005	0,72910136	722,2630005	0,541971922	722,262146	0,311015189	722,2528076	0,219158739	722,2528076	0,175242364	722,2528076	0,20367375
722,2879028	0,477556676	722,2870483	0,21101743	722,27771	0,140540078	722,27771	0,181717291	722,2870483	0,182652637	722,2879028	0,519355893	722,2879028	0,540089011	722,2879028	0,394762367	722,2870483	0,310846865	722,27771	0,151391849	722,27771	0,139408544	722,27771	0,14296177
722,3128052	0,493566036	722,3119507	0,271069586	722,3026123	0,15142718	722,3026123	0,207334116	722,3119507	0,206967339	722,3128052	0,447852314	722,3128052	0,495307535	722,3128052	0,358631253	722,3119507	0,38748154	722,3026123	0,142795593	722,3026123	0,159540385	722,3026123	0,141634077
722,3377075	0,496028781	722,336853	0,272188902	722,3275146	0,181598917	722,3275146	0,29103902	722,336853	0,17530331	722,3377075	0,367238551	722,3377075	0,458551466	722,3377075	0,32347095	722,336853	0,409688056	722,3275146	0,165019006	722,3275146	0,232308224	722,3275146	0,189242855
722,3626099	0,449105144	722,3617554	0,347840965	722,352478	0,185322821	722,352478	0,325268	722,3617554	0,207307607	722,3626099	0,300901204	722,3626099	0,384504765	722,3626099	0,274356097	722,3617554	0,52286756	722,352478	0,149222255	722,352478	0,260479152	722,352478	0,1857173
722,3875122	0,529409826	722,3866577	0,578522205	722,3773804	0,261005104	722,3773804	0,448348641	722,3866577	0,329290479	722,3875122	0,327079833	722,3875122	0,422619998	722,3875122	0,318811655	722,3866577	0,789155602	722,3773804	0,182744786	722,3773804	0,339597285	722,3773804	0,245155007
722,4124146	0,612856567	722,4115601	0,812608957	722,4022827	0,404106796	722,4022827	0,623251796	722,4115601	0,449371755	722,4124146	0,342336923	722,4124146	0,476028889	722,4124146	0,369208723	722,4115601	0,992161572	722,4022827	0,286082953	722,4022827	0,490480334	722,4022827	0,389974743
722,4373169	0,60904181	722,4364624	1,08825469	722,4271851	0,498473555	722,4271851	0,659864128	722,4364624	0,65428555	722,4373169	0,331954569	722,4373169	0,488845766	722,4373169	0,410059631	722,4364624	1,152117968	722,4271851	0,374139577	722,4271851	0,543111384	722,4271851	0,480387151
722,4622192	0,622759938	722,4613647	1,385659456	722,4520874	0,578346968	722,4520874	0,64342165	722,4613647	0,971388578	722,4622192	0,372224182	722,4622192	0,52585727	722,4622192	0,491539717	722,4613647	1,261552215	722,4520874	0,482816339	722,4520874	0,528071523	722,4520874	0,545188129
722,4871216	0,668307185	722,4862671	1,418881655	722,4769897	0,637857556	722,4769897	0,619210064	722,4862671	1,183668613	722,4871216	0,48694247	722,4871216	0,664216518	722,4871216	0,678215086	722,4862671	1,121855021	722,4769897	0,620051503	722,4769897	0,520623565	722,4769897	0,621876895
722,5120239	0,570881546	722,5111694	1,256690979	722,5018921	0,610424161	722,5018921	0,516711831	722,5111694	1,224942207	722,5120239	0,530602396	722,5120239	0,689877868	722,5120239	0,784455061	722,5111694	0,892358601	722,5018921	0,6593647	722,5018921	0,440324634	722,5018921	0,605588317
722,5369263	0,430878431	722,5360718	1,107935548	722,5267944	0,510123014	722,5267944	0,360825241	722,5360718	1,226623535	722,5369263	0,548258781	722,5369263	0,619634628	722,5369263	0,812995732	722,5360718	0,745999396	722,5267944	0,608464241	722,5267944	0,307462335	722,5267944	0,495396584
722,5618286	0,373824239	722,5609741	0,871314704	722,5516968	0,406737417	722,5516968	0,259905696	722,5609741	1,090059638	722,5618286	0,57018137	722,5618286	0,580381811	722,5618286	0,794985592	722,5609741	0,570393085	722,5516968	0,547881782	722,5516968	0,213071153	722,5516968	0,388317645
722,586731	0,280495882	722,5858765	0,561689377	722,5765991	0,304228067	722,5765991	0,207060322	722,5858765	0,811312854	722,586731	0,493060797	722,586731	0,473831534	722,586731	0,646409631	722,5858765	0,342119843	722,5765991	0,440354496	722,5765991	0,180718601	722,5765991	0,307087958
722,6116333	0,171667129	722,6107788	0,386761755	722,6015015	0,178711489	722,6015015	0,111790441	722,6107788	0,600463271	722,6116333	0,36749801	722,6116333	0,310280174	722,6116333	0,46689865	722,6107788	0,236683682	722,6015015	0,283685833	722,6015015	0,100850642	722,6015015	0,174212441
722,6365356	0,178465694	722,6356812	0,312891752	722,6264038	0,133566499	722,6264038	0,097918011	722,6356812	0,460261256	722,6365356	0,317681909	722,6365356	0,256829858	722,6365356	0,371293157	722,6356812	0,226605549	722,6264038	0,201599106	722,6264038	0,074171007	722,6264038	0,125400752
722,661438	0,163338259	722,6605835	0,193029225	722,6513062	0,122904114	722,6513062	0,125183985	722,6605835	0,29181233	722,661438	0,231624916	722,661438	0,212298661	722,661438	0,267436683	722,6605835	0,14261435	722,6513062	0,166179895	722,6513062	0,110704705	722,6513062	0,128483072
722,6863403	0,115221672	722,6854858	0,133099288	722,6762085	0,075448751	722,6762085	0,079910234	722,6854858	0,205825716	722,6863403	0,148618102	722,6863403	0,124339022	722,6863403	0,170606717	722,6854858	0,110104904	722,6762085	0,100874834	722,6762085	0,074451335	722,6762085	0,079718851
722,7112427	0,142113149	722,7103882	0,158777505	722,7011108	0,071771912	722,7011108	0,065573134	722,7103882	0,191083416	722,7112427	0,143596888	722,7112427	0,144018829	722,7112427	0,157873258	722,7103882	0,147203341	722,7011108	0,078740053	722,7011108	0,054830335	722,7011108	0,0610797
722,736145	0,148443848	722,7352905	0,114385009	722,7260132	0,087137766	722,7260132	0,097911932	722,7352905	0,132825807	722,736145	0,126235873	722,736145	0,147111312	722,736145	0,143992916	722,7352905	0,105323464	722,7260132	0,096935861	722,7260132	0,090644352	722,7260132	0,095961839
722,7610474	0,094302721	722,7601929	0,075302288	722,7509155	0,061915956	722,7509155	0,064597718	722,7601929	0,091666147	722,7610474	0,086828895	722,7610474	0,09303762	722,7610474	0,093086161	722,7601929	0,073068604	722,7509155	0,068952702	722,7509155	0,062906139	722,7509155	0,06329827
722,7859497	0,101512827	722,7850952	0,113639414	722,7758179	0,047286648	722,7758179	0,043696314	722,7850952	0,114291593	722,7859497	0,106843397	722,7859497	0,109171338	722,7859497	0,107081249	722,7850952	0,113686197	722,7758179	0,049688261	722,7758179	0,036222339	722,7758179	0,04257977
722,8108521	0,123935461	722,8099976	0,094859086	722,8007202	0,068221197	722,8007202	0,078259215	722,8099976	0,085746236	722,8108521	0,108208589	722,8108521	0,129128039	722,8108521	0,11529734	722,8099976	0,093076259	722,8007202	0,072440252	722,8007202	0,075246535	722,8007202	0,07457222
722,8357544	0,094147712	722,8348999	0,057711005	722,8256226	0,049406961	722,8256226	0,061968315	722,8348999	0,059267271	722,8357544	0,080983467	722,8357544	0,101311289	722,8357544	0,089278758	722,8348999	0,062239435	722,8256226	0,057130095	722,8256226	0,069821596	722,8256226	0,060134087
722,8607178	0,06641537	722,8598022	0,095227532	722,8505249	0,037353855	722,8505249	0,042094305	722,8598022	0,086630814	722,8607178	0,060717903	722,8607178	0,06810607	722,8607178	0,063039251	722,8598022	0,101404235	722,8505249	0,038278084	722,8505249	0,038282387	722,8505249	0,033731956
722,8856201	0,10704653	722,8847046	0,121504299	722,8754272	0,061990097	722,8754272	0,076630242	722,8847046	0,101129137	722,8856201	0,078541756	722,8856201	0,093834214	722,8856201	0,092761144	722,8847046	0,124690153	722,8754272	0,062366497	722,8754272	0,063723072	722,8754272	0,060358409
722,9105225	0,106348857	722,9096069	0,070606716	722,9003296	0,060912199	722,9003296	0,090607904	722,9096069	0,061376564	722,9105225	0,070676818	722,9105225	0,101097368	722,9105225	0,081849426	722,9096069	0,080390111	722,9003296	0,06570524	722,9003296	0,086123653	722,9003296	0,077164881
722,9354248	0,08689893	722,9345703	0,078950115	722,9252319	0,042366982	722,9252319	0,061571281	722,9345703	0,067968249	722,9354248	0,052622318	722,9354248	0,072819419	722,9354248	0,058473423	722,9345703	0,104364194	722,9252319	0,040965512	722,9252319	0,059347663	722,9252319	0,044856485
722,9603271	0,175507858	722,9594727	0,138001993	722,9501953	0,057172902	722,9501953	0,104332604	722,9594727	0,099846967	722,9603271	0,080393128	722,9603271	0,10441801	722,9603271	0,089582644	722,9594727	0,200185254	722,9501953	0,050979432	722,9501953	0,080852069	722,9501953	0,05500491
722,9852295	0,336499184	722,984375	0,135218516	722,9750977	0,097017825	722,9750977	0,237285525	722,984375	0,077677347	722,9852295	0,084380224	722,9852295	0,143894598	722,9852295	0,102515295	722,984375	0,272234261	722,9750977	0,079941489	722,9750977	0,164845467	722,9750977	0,106671058
723,0101318	0,654758513	723,0092773	0,190337658	723	0,115243725	723	0,398894757	723,0092773	0,098141305	723,0101318	0,079499476	723,0101318	0,181043059	723,0101318	0,098553054	723,0092773	0,47096023	723	0,06995263	723	0,225364611	723	0,114642225
723,0350342	1,27470243	723,0341797	0,339242578	723,0249023	0,223113	723,0249023	0,700043499	723,0341797	0,182947546	723,0350342	0,172260791	723,0350342	0,405122906	723,0350342	0,197550952	723,0341797	0,758003533	723,0249023	0,112786815	723,0249023	0,348709285	723,0249023	0,196974173
723,0599365	1,846556306	723,059082	0,398010105	723,0498047	0,416395336	723,0498047	0,982980788	723,059082	0,219792485	723,0599365	0,333323181	723,0599365	0,779736102	723,0599365	0,348318607	723,059082	0,860375106	723,0498047	0,235323071	723,0498047	0,511677086	723,0498047	0,378094822
723,0848389	1,952626228	723,0839844	0,409209609	723,074707	0,533420861	723,074707	0,918093145	723,0839844	0,255462378	723,0848389	0,547752202	723,0848389	1,10532999	723,0848389	0,516131103	723,0839844	0,809526026	723,074707	0,342255235	723,074707	0,497349888	723,074707	0,481794745
723,1097412	1,721917152	723,1088867	0,442548424	723,0996094	0,542924166	723,0996094	0,704469919	723,1088867	0,325878799	723,1097412	0,844296634	723,1097412	1,407856464	723,1097412	0,734458864	723,1088867	0,735293925	723,0996094	0,429398298	723,0996094	0,385911047	723,0996094	0,482726216
723,1346436	1,342748165	723,1337891	0,370108426	723,1245117	0,493066669	723,1245117	0,551861584	723,1337891	0,30506137	723,1346436	1,002671123	723,1346436	1,452845693	723,1346436	0,836101353	723,1337891	0,555754125	723,1245117	0,477439314	723,1245117	0,329221129	723,1245117	0,464236319
723,1595459	0,928084016	723,1586914	0,258275598	723,1494141	0,3659105	723,1494141	0,376107395	723,1586914	0,246730804	723,1595459	0,965334237	723,1595459	1,203042626	723,1595459	0,751330793	723,1586914	0,380420208	723,1494141	0,406143755	723,1494141	0,241887271	723,1494141	0,356631696
723,1844482	0,719790339	723,1835938	0,246033818	723,1743164	0,258980155	723,1743164	0,243700624	723,1835938	0,239673808	723,1844482	0,898418427	723,1844482	1,011622906	723,1844482	0,687672257	723,1835938	0,340599746	723,1743164	0,304635882	723,1743164	0,150737956	723,1743164	0,237741247
723,2093506	0,617124021	723,2084961	0,208579421	723,1992188	0,215532243	723,1992188	0,228640646	723,2084961	0,194558218	723,2093506	0,80683285	723,2093506	0,850286663	723,2093506	0,60545522	723,2084961	0,284072995	723,1992188	0,262612641	723,1992188	0,154340029	723,1992188	0,212645441
723,2342529	0,477863818	723,2333984	0,141491935	723,2241211	0,161938354	723,2241211	0,183733791	723,2333984	0,130183339	723,2342529	0,623885274	723,2342529	0,641034544	723,2342529	0,467336357	723,2333984	0,202552453	723,2241211	0,197798312	723,2241211	0,13999708	723,2241211	0,170039713
723,2591553	0,350070298	723,2583008	0,154213041	723,2490234	0,11226391	723,2490234	0,127595887	723,2583008	0,14124985	723,2591553	0,451105326	723,2591553	0,446763933	723,2591553	0,336110115	723,2583008	0,214407861	723,2490234	0,132338732	723,2490234	0,096916772	723,2490234	0,106627919
723,2840576	0,351749808	723,2832031	0,186941877	723,2739258	0,123110421	723,2739258	0,143156335	723,2832031	0,154652849	723,2840576	0,379609466	723,2840576	0,39498502	723,2840576	0,299241215	723,2832031	0,259267122	723,2739258	0,131290585	723,2739258	0,107587926	723,2739258	0,11374414
723,30896	0,333263516	723,3081055	0,157844573	723,2988281	0,14106074	723,2988281	0,200785205	723,3081055	0,114180885	723,30896	0,3007465	723,30896	0,34872812	723,30896	0,244905308	723,3081055	0,240082219	723,2988281	0,143751666	723,2988281	0,164351657	723,2988281	0,149911746
723,3338623	0,28952831	723,3330078	0,190099731	723,3237305	0,124549657	723,3237305	0,214737907	723,3330078	0,117037095	723,3338623	0,227704361	723,3338623	0,265540808	723,3338623	0,184078872	723,3330078	0,312074691	723,3237305	0,109966375	723,3237305	0,174808532	723,3237305	0,127628759
723,3587646	0,356807441	723,3579102	0,362458408	723,3486328	0,180186808	723,3486328	0,323474228	723,3579102	0,192781836	723,3587646	0,233766869	723,3587646	0,289322346	723,3587646	0,212613672	723,3579102	0,577367544	723,3486328	0,129497364	723,3486328	0,255042374	723,3486328	0,166622221
723,383667	0,502419233	723,3828125	0,563336313	723,3735352	0,315649003	723,3735352	0,584356606	723,3828125	0,255183578	723,383667	0,229748771	723,383667	0,334107548	723,383667	0,240891173	723,3828125	0,894792736	723,3735352	0,224318743	723,3735352	0,464827001	723,3735352	0,307930142
723,4085693	0,65516293	723,4077148	0,889538586	723,3984375	0,467854381	723,3984375	0,806780457	723,4077148	0,414628565	723,4085693	0,224404037	723,4085693	0,36233142	723,4085693	0,2710976	723,4077148	1,276545405	723,3984375	0,315846294	723,3984375	0,654000401	723,3984375	0,444392085
723,4334717	0,881047606	723,4326172	1,298251748	723,4233398	0,673429132	723,4233398	0,952332735	723,4326172	0,736460984	723,4334717	0,325171739	723,4334717	0,540684819	723,4334717	0,446143538	723,4326172	1,62175703	723,4233398	0,466422409	723,4233398	0,793665469	723,4233398	0,616933823
723,458374	1,01480937	723,4575195	1,493162155	723,4482422	0,893192947	723,4482422	1,008729815	723,4575195	1,020300865	723,458374	0,4847202	723,458374	0,787942946	723,458374	0,684892476	723,4575195	1,628821254	723,4482422	0,686124861	723,4482422	0,879315197	723,4482422	0,8167184
723,4832764	0,857873976	723,4824219	1,448248386	723,4731445	0,932841659	723,4731445	0,830999672	723,4824219	1,208719373	723,4832764	0,603136778	723,4832764	0,93450886	723,4832764	0,893339574	723,4824219	1,367270112	723,4731445	0,82273972	723,4731445	0,741077662	723,4731445	0,852449715
723,5081787	0,671321094	723,5073242	1,302448153	723,4980469	0,819193184	723,4980469	0,573959887	723,5073242	1,289749622	723,5081787	0,76242882	723,5081787	1,01709342	723,5081787	1,08240056	723,5073242	1,084153891	723,4980469	0,854238212	723,4980469	0,507998407	723,4980469	0,738130212
723,5330811	0,50513047	723,5322266	1,014859796	723,5229492	0,658975482	723,5229492	0,427766263	723,5322266	1,171320438	723,5330811	0,798717439	723,5330811	0,958758116	723,5330811	1,105427861	723,5322266	0,75732702	723,5229492	0,80210644	723,5229492	0,373917401	723,5229492	0,610937893
723,5579834	0,356877357	723,5571289	0,676188648	723,5479126	0,452300102	723,5479126	0,278891891	723,5571289	0,916386366	723,5579834	0,715068579	723,5579834	0,764619827	723,5579834	0,974909365	723,5571289	0,455887049	723,5479126	0,632808208	723,5479126	0,254935235	723,5479126	0,435992837
723,5828857	0,2526806	723,5820313	0,489109486	723,5728149	0,28611204	723,5728149	0,153695941	723,5820313	0,71126163	723,5828857	0,611251652	723,5828857	0,584120333	723,5828857	0,796983361	723,5820313	0,335377574	723,5728149	0,429676443	723,5728149	0,131875783	723,5728149	0,25787127
723,6078491	0,213527292	723,6069946	0,346236736	723,5977173	0,213295981	723,5977173	0,14755927	723,6069946	0,512929857	723,6078491	0,499433637	723,6078491	0,447403997	723,6078491	0,614369273	723,6069946	0,241485715	723,5977173	0,320615679	723,5977173	0,121811308	723,5977173	0,201962844
723,6327515	0,165702507	723,631897	0,221284315	723,6226196	0,169414565	723,6226196	0,142937392	723,631897	0,361285418	723,6327515	0,355092853	723,6327515	0,328443021	723,6327515	0,431240171	723,631897	0,148424089	723,6226196	0,25233674	723,6226196	0,133545741	723,6226196	0,176133543
723,6576538	0,100736871	723,6567993	0,165109202	723,647522	0,106106162	723,647522	0,090107553	723,6567993	0,273207635	723,6576538	0,22794266	723,6576538	0,197475567	723,6576538	0,275317341	723,6567993	0,11546199	723,647522	0,163680196	723,647522	0,082976922	723,647522	0,112302192
723,6825562	0,116759002	723,6817017	0,169129521	723,6724243	0,090622194	723,6724243	0,079412788	723,6817017	0,22971569	723,6825562	0,195342883	723,6825562	0,17360504	723,6825562	0,221340179	723,6817017	0,14872767	723,6724243	0,115099996	723,6724243	0,063411824	723,6724243	0,080244325
723,7074585	0,124195717	723,706604	0,12244267	723,6973267	0,103505746	723,6973267	0,117746659	723,706604	0,152474657	723,7074585	0,153591231	723,7074585	0,147761017	723,7074585	0,17178449	723,706604	0,104636043	723,6973267	0,122334577	723,6973267	0,099125408	723,6973267	0,108275473
723,7323608	0,0801761	723,7315063	0,084529914	723,722229	0,073865294	723,722229	0,080794573	723,7315063	0,105998561	723,7323608	0,091294967	723,7323608	0,098206878	723,7323608	0,10945981	723,7315063	0,074468322	723,722229	0,087444589	723,722229	0,073280171	723,722229	0,077737428
723,7572632	0,088929974	723,7564087	0,122353502	723,7471313	0,059623931	723,7471313	0,057468913	723,7564087	0,124243543	723,7572632	0,104805492	723,7572632	0,100794904	723,7572632	0,113019511	723,7564087	0,117083028	723,7471313	0,066990018	723,7471313	0,047052339	723,7471313	0,055607822
723,7821655	0,094777673	723,781311	0,102209672	723,7720337	0,082875215	723,7720337	0,090419464	723,781311	0,101404041	723,7821655	0,101387419	723,7821655	0,115646608	723,7821655	0,11200539	723,781311	0,099635303	723,7720337	0,089289829	723,7720337	0,081998535	723,7720337	0,08795882
723,8070679	0,054525536	723,8062134	0,069914222	723,796936	0,060797624	723,796936	0,071553364	723,8062134	0,073111191	723,8070679	0,062198646	723,8070679	0,065149747	723,8070679	0,070398703	723,8062134	0,069904804	723,796936	0,071303889	723,796936	0,073550411	723,796936	0,070639871
723,8319702	0,063133612	723,8311157	0,110821843	723,8218384	0,048590373	723,8218384	0,053476647	723,8311157	0,106217094	723,8319702	0,074001648	723,8319702	0,066667758	723,8319702	0,080917187	723,8311157	0,112256177	723,8218384	0,050528098	723,8218384	0,046843939	723,8218384	0,044728827
723,8568726	0,088424005	723,8560181	0,110352606	723,8467407	0,07397826	723,8467407	0,089265384	723,8560181	0,103204541	723,8568726	0,088564433	723,8568726	0,093322583	723,8568726	0,101627521	723,8560181	0,109357826	723,8467407	0,072831027	723,8467407	0,081128217	723,8467407	0,079186529
723,8817749	0,055439986	723,8809204	0,071465872	723,8716431	0,066544808	723,8716431	0,0895188	723,8809204	0,074654549	723,8817749	0,048595998	723,8817749	0,061408162	723,8817749	0,06588541	723,8809204	0,07856638	723,8716431	0,070590153	723,8716431	0,092289977	723,8716431	0,08083123
723,9066772	0,065664001	723,9058228	0,109884374	723,8965454	0,051561285	723,8965454	0,064578608	723,9058228	0,099385634	723,9066772	0,064102784	723,9066772	0,069118604	723,9066772	0,073487706	723,9058228	0,127775505	723,8965454	0,05211696	723,8965454	0,062529318	723,8965454	0,05772385
723,9315796	0,112854965	723,9307251	0,130108714	723,9214478	0,078915171	723,9214478	0,121586822	723,9307251	0,105125509	723,9315796	0,098234132	723,9315796	0,106137514	723,9315796	0,101182744	723,9307251	0,156841546	723,9214478	0,077218994	723,9214478	0,102664746	723,9214478	0,090162866
723,9564819	0,145087168	723,9556274	0,106277786	723,9463501	0,084392548	723,9463501	0,167319983	723,9556274	0,078638487	723,9564819	0,078356594	723,9564819	0,103045359	723,9564819	0,090542093	723,9556274	0,152578652	723,9463501	0,076452345	723,9463501	0,136674568	723,9463501	0,107842945
723,9813843	0,199038506	723,9805298	0,13880007	723,9712524	0,086690307	723,9712524	0,224584758	723,9805298	0,104404435	723,9813843	0,057383269	723,9813843	0,081388026	723,9813843	0,072268024	723,9805298	0,225212678	723,9712524	0,063023128	723,9712524	0,145392716	723,9712524	0,091975212
724,0062866	0,459622383	724,0054321	0,211507842	723,9961548	0,133707926	723,9961548	0,366620094	724,0054321	0,14415732	724,0062866	0,102052957	724,0062866	0,164757997	724,0062866	0,115856931	724,0054321	0,353782564	723,9961548	0,088112138	723,9961548	0,209337249	723,9961548	0,128561586
724,031189	0,783379853	724,0303345	0,226932898	724,0210571	0,209441602	724,0210571	0,560721636	724,0303345	0,137223408	724,031189	0,143881574	724,031189	0,306639344	724,031189	0,172004208	724,0303345	0,427017778	724,0210571	0,133939549	724,0210571	0,31307736	724,0210571	0,212628648
724,0560913	1,007593274	724,0552368	0,234039918	724,0459595	0,286061466	724,0459595	0,66323632	724,0552368	0,150108337	724,0560913	0,199307948	724,0560913	0,43409726	724,0560913	0,227189049	724,0552368	0,44728002	724,0459595	0,169238284	724,0459595	0,356511027	724,0459595	0,273256093
724,0809937	1,08940804	724,0801392	0,297981381	724,0708618	0,367317289	724,0708618	0,612603366	724,0801392	0,215039685	724,0809937	0,368487388	724,0809937	0,682054698	724,0809937	0,3645733	724,0801392	0,48513791	724,0708618	0,237727553	724,0708618	0,311865419	724,0708618	0,330391049
724,105896	0,968377769	724,1050415	0,263745815	724,0957642	0,410814852	724,0957642	0,540877342	724,1050415	0,207055733	724,105896	0,513191581	724,105896	0,818963885	724,105896	0,466856927	724,1050415	0,400610924	724,0957642	0,338733017	724,0957642	0,307715952	724,0957642	0,385590315
724,1307983	0,699102521	724,1299438	0,18916972	724,1206665	0,336230248	724,1206665	0,401948392	724,1299438	0,160786942	724,1307983	0,550465465	724,1307983	0,753159165	724,1307983	0,458635449	724,1299438	0,28405121	724,1206665	0,326503813	724,1206665	0,241156593	724,1206665	0,322286636
724,1557007	0,541144311	724,1548462	0,199484676	724,1456299	0,253830343	724,1456299	0,270005822	724,1548462	0,178294465	724,1557007	0,566417217	724,1557007	0,669035256	724,1557007	0,446701527	724,1548462	0,268445194	724,1456299	0,268082201	724,1456299	0,154600292	724,1456299	0,229318321
724,180603	0,442997366	724,1797485	0,16793482	724,1705322	0,226965979	724,1705322	0,24066551	724,1797485	0,153168991	724,180603	0,50739491	724,180603	0,577355921	724,180603	0,407406896	724,1797485	0,209471121	724,1705322	0,25343889	724,1705322	0,155450329	724,1705322	0,22015956
724,2055054	0,299062878	724,2046509	0,100822769	724,1954346	0,168118358	724,1954346	0,174183145	724,2046509	0,101468369	724,2055054	0,385081351	724,2055054	0,414857566	724,2055054	0,290977508	724,2046509	0,130302787	724,1954346	0,204035535	724,1954346	0,132007793	724,1954346	0,174518257
724,2304077	0,239252761	724,2295532	0,121258453	724,2203369	0,111141667	724,2203369	0,109122932	724,2295532	0,117102906	724,2304077	0,326801062	724,2304077	0,32330969	724,2304077	0,245406464	724,2295532	0,153179526	724,2203369	0,13970536	724,2203369	0,07750687	724,2203369	0,102265514
724,2553101	0,250545651	724,2544556	0,12654379	724,2452393	0,11983455	724,2452393	0,139620885	724,2544556	0,10764534	724,2553101	0,279746264	724,2553101	0,294457585	724,2553101	0,226494953	724,2544556	0,153024688	724,2452393	0,13384527	724,2452393	0,105426379	724,2452393	0,114284739
724,2802124	0,212954253	724,2793579	0,088460267	724,2701416	0,103174135	724,2701416	0,143543854	724,2793579	0,073282741	724,2802124	0,20458746	724,2802124	0,225061536	724,2802124	0,174495324	724,2793579	0,116629988	724,2701416	0,115651727	724,2701416	0,125286639	724,2701416	0,114731632
724,3051147	0,169237494	724,3043213	0,137392938	724,2950439	0,085268006	724,2950439	0,119103007	724,3043213	0,101783521	724,3051147	0,163228109	724,3051147	0,176496014	724,3051147	0,13470991	724,3043213	0,184609279	724,2950439	0,081576914	724,2950439	0,094788112	724,2950439	0,078743517
724,3300781	0,203938738	724,3292236	0,207073659	724,3199463	0,126287282	724,3199463	0,193427354	724,3292236	0,126133606	724,3300781	0,171758831	724,3300781	0,186249062	724,3300781	0,150994033	724,3292236	0,287386447	724,3199463	0,109857701	724,3199463	0,153712526	724,3199463	0,119167246
724,3549805	0,242754981	724,354126	0,243148535	724,3448486	0,160034403	724,3448486	0,285446793	724,354126	0,127226874	724,3549805	0,158132553	724,3549805	0,202538788	724,3549805	0,153482988	724,354126	0,361337155	724,3448486	0,13386853	724,3448486	0,24577114	724,3448486	0,168662965
724,3798828	0,259436816	724,3790283	0,359812021	724,369751	0,188275158	724,369751	0,345869452	724,3790283	0,16969043	724,3798828	0,118076093	724,3798828	0,17650488	724,3798828	0,134050623	724,3790283	0,526135564	724,369751	0,136564016	724,369751	0,290331155	724,369751	0,184604347
724,4047852	0,403412431	724,4039307	0,664619505	724,3946533	0,26335454	724,3946533	0,462992609	724,4039307	0,340349823	724,4047852	0,170773879	724,4047852	0,243097171	724,4047852	0,209258124	724,4039307	0,867796361	724,3946533	0,18185173	724,3946533	0,376994044	724,3946533	0,249515966
724,4296875	0,560285807	724,428833	0,92140305	724,4195557	0,43141517	724,4195557	0,650368333	724,428833	0,517396033	724,4296875	0,223215625	724,4296875	0,356614679	724,4296875	0,313086033	724,428833	1,084138751	724,4195557	0,318876922	724,4195557	0,551698029	724,4195557	0,418373883
724,4545898	0,586119652	724,4537354	1,067253947	724,444458	0,553924739	724,444458	0,677407146	724,4537354	0,720586896	724,4545898	0,265188396	724,4545898	0,442223042	724,4545898	0,419202954	724,4537354	1,117398977	724,444458	0,43925038	724,444458	0,593258321	724,444458	0,529167175
724,4794922	0,586590469	724,4786377	1,157028675	724,4693604	0,609488428	724,4693604	0,582045317	724,4786377	0,932835817	724,4794922	0,405033082	724,4794922	0,599807143	724,4794922	0,620106578	724,4786377	1,087809801	724,4693604	0,543132007	724,4693604	0,505887389	724,4693604	0,559765339
724,5043945	0,529475987	724,50354	1,044371247	724,4942627	0,606224477	724,4942627	0,505524695	724,50354	0,994506717	724,5043945	0,513522685	724,5043945	0,712706506	724,5043945	0,779527843	724,50354	0,889957905	724,4942627	0,636271238	724,4942627	0,435677409	724,4942627	0,579026639
724,5292969	0,355600208	724,5284424	0,801062703	724,519165	0,501853287	724,519165	0,36540553	724,5284424	0,893459439	724,5292969	0,512485862	724,5292969	0,619517386	724,5292969	0,761689842	724,5284424	0,612319529	724,519165	0,610435188	724,519165	0,326861858	724,519165	0,493926674
724,5541992	0,255080432	724,5533447	0,625945687	724,5440674	0,364417076	724,5440674	0,210870683	724,5533447	0,787136614	724,5541992	0,497037798	724,5541992	0,513167977	724,5541992	0,701540709	724,5533447	0,456949621	724,5440674	0,494447529	724,5440674	0,18151924	724,5440674	0,337253094
724,5791016	0,207729533	724,5782471	0,452638865	724,5689697	0,280236185	724,5689697	0,172049746	724,5782471	0,617295623	724,5791016	0,449068964	724,5791016	0,434654653	724,5791016	0,594404757	724,5782471	0,308677882	724,5689697	0,401627779	724,5689697	0,142877385	724,5689697	0,269861728
724,6040039	0,118090555	724,6031494	0,26599738	724,5938721	0,184221834	724,5938721	0,118242987	724,6031494	0,416633159	724,6040039	0,303205132	724,6040039	0,279054374	724,6040039	0,411644995	724,6031494	0,157666683	724,5938721	0,285571605	724,5938721	0,110828012	724,5938721	0,193206668
724,6289063	0,075232677	724,6280518	0,205273181	724,6187744	0,099375069	724,6187744	0,056507282	724,6280518	0,315420955	724,6289063	0,224973932	724,6289063	0,178010702	724,6289063	0,279897928	724,6280518	0,133789241	724,6187744	0,167623833	724,6187744	0,055590473	724,6187744	0,092696518
724,6538086	0,100552268	724,6529541	0,166944727	724,6436768	0,09117005	724,6436768	0,079747319	724,6529541	0,226512372	724,6538086	0,206147507	724,6538086	0,176239759	724,6538086	0,250190258	724,6529541	0,121128187	724,6436768	0,134941831	724,6436768	0,065994695	724,6436768	0,084320776
724,6787109	0,092041329	724,6778564	0,083738975	724,6685791	0,073534705	724,6685791	0,083003566	724,6778564	0,128551424	724,6787109	0,156760767	724,6787109	0,13744925	724,6787109	0,183616906	724,6778564	0,062387116	724,6685791	0,105701663	724,6685791	0,079850003	724,6685791	0,083227709
724,7036133	0,057505049	724,7027588	0,079948656	724,6934814	0,044484269	724,6934814	0,042527765	724,7027588	0,114266105	724,7036133	0,082474716	724,7036133	0,069931656	724,7036133	0,105145134	724,7027588	0,068733558	724,6934814	0,059683412	724,6934814	0,037103377	724,6934814	0,041634768
724,7285156	0,071066879	724,7276611	0,102067173	724,7183838	0,058748614	724,7183838	0,052276094	724,7276611	0,123091042	724,7285156	0,085053027	724,7285156	0,077935174	724,7285156	0,095766939	724,7276611	0,088269904	724,7183838	0,064346068	724,7183838	0,041688684	724,7183838	0,049065482
724,753418	0,07923016	724,7525635	0,080387488	724,7433472	0,069434658	724,7433472	0,06739907	724,7525635	0,085320525	724,753418	0,077563442	724,753418	0,089843228	724,753418	0,085288398	724,7525635	0,066184692	724,7433472	0,077807888	724,7433472	0,061623208	724,7433472	0,069980711
724,7783203	0,037384681	724,7774658	0,048716269	724,7682495	0,043809723	724,7682495	0,048462868	724,7774658	0,052068274	724,7783203	0,038636174	724,7783203	0,050786883	724,7783203	0,046128247	724,7774658	0,041170031	724,7682495	0,056498639	724,7682495	0,049073823	724,7682495	0,050401811
724,8032227	0,046298973	724,8023682	0,075517066	724,7931519	0,027555773	724,7931519	0,027127586	724,8023682	0,073930062	724,8032227	0,052152827	724,8032227	0,055321567	724,8032227	0,058824025	724,8023682	0,070289455	724,7931519	0,03639172	724,7931519	0,025119446	724,7931519	0,026494337
724,828125	0,062273145	724,8272705	0,075255305	724,8180542	0,043262046	724,8180542	0,051150993	724,8272705	0,068228394	724,828125	0,057240743	724,828125	0,070212215	724,828125	0,067831144	724,8272705	0,068991281	724,8180542	0,050657775	724,8180542	0,052171428	724,8180542	0,050237283
724,8530273	0,033304382	724,8521729	0,047285181	724,8429565	0,041098025	724,8429565	0,049538046	724,8521729	0,043721687	724,8530273	0,029339446	724,8530273	0,035503913	724,8530273	0,039421186	724,8521729	0,040408272	724,8429565	0,045706742	724,8429565	0,057537887	724,8429565	0,049740985
724,8779297	0,042932712	724,8770752	0,075985126	724,8678589	0,02832238	724,8678589	0,029990673	724,8770752	0,070355535	724,8779297	0,039452024	724,8779297	0,039087415	724,8779297	0,044462204	724,8770752	0,071411118	724,8678589	0,030337961	724,8678589	0,032453809	724,8678589	0,026603431
724,902832	0,08734376	724,9019775	0,083743945	724,8927612	0,049353421	724,8927612	0,064103492	724,9019775	0,068454385	724,902832	0,055626065	724,902832	0,074211523	724,902832	0,069889061	724,9019775	0,084270544	724,8927612	0,0495262	724,8927612	0,058339324	724,8927612	0,051240314
724,9277344	0,067989349	724,9268799	0,053413864	724,9176636	0,047317471	724,9176636	0,075006962	724,9268799	0,045767352	724,9277344	0,034116276	724,9277344	0,057336137	724,9277344	0,045439791	724,9268799	0,062729761	724,9176636	0,049304944	724,9176636	0,078237519	724,9176636	0,061624829
724,9526367	0,094161071	724,9517822	0,089663185	724,9425659	0,036483642	724,9425659	0,070530191	724,9517822	0,070392773	724,9526367	0,042733084	724,9526367	0,057948448	724,9526367	0,049506202	724,9517822	0,127427816	724,9425659	0,033713792	724,9425659	0,059883729	724,9425659	0,038374003
724,9775391	0,265510947	724,9766846	0,137828678	724,9674683	0,072919451	724,9674683	0,190956205	724,9766846	0,081811078	724,9775391	0,073260769	724,9775391	0,117287375	724,9775391	0,08720044	724,9766846	0,247907594	724,9674683	0,057566158	724,9674683	0,129162297	724,9674683	0,07247369
725,0024414	0,432706773	725,0016479	0,157399148	724,9923706	0,115116224	724,9923706	0,386064619	725,0016479	0,070045792	725,0024414	0,076027364	725,0024414	0,158124894	725,0024414	0,092324719	725,0016479	0,34776774	724,9923706	0,076380566	724,9923706	0,247061238	724,9923706	0,126793683
725,0273438	0,693130612	725,0265503	0,260183543	725,0172729	0,176384762	725,0172729	0,604869545	725,0265503	0,133677781	725,0273438	0,074186593	725,0273438	0,223492935	725,0273438	0,097343341	725,0265503	0,526083589	725,0172729	0,092664309	725,0172729	0,337568283	725,0172729	0,169465452
725,0522461	1,120630741	725,0514526	0,343138456	725,0421753	0,336264998	725,0421753	0,827937245	725,0514526	0,201642975	725,0522461	0,201512918	725,0522461	0,498417556	725,0522461	0,22125338	725,0514526	0,622049332	725,0421753	0,199922174	725,0421753	0,451610744	725,0421753	0,317462802
725,0772095	1,390508652	725,076355	0,318395317	725,0670776	0,45438242	725,0670776	0,818385839	725,076355	0,197262868	725,0772095	0,37110576	725,0772095	0,837062836	725,0772095	0,396151304	725,076355	0,563374162	725,0670776	0,320219815	725,0670776	0,483334571	725,0670776	0,445450455
725,1021118	1,27035439	725,1012573	0,283102661	725,09198	0,447246104	725,09198	0,665195644	725,1012573	0,198959962	725,1021118	0,535323083	725,1021118	1,035662889	725,1021118	0,520644069	725,1012573	0,486607045	725,09198	0,365969121	725,09198	0,400819063	725,09198	0,435873926
725,1270142	1,028141737	725,1261597	0,287730664	725,1168823	0,413480282	725,1168823	0,528987169	725,1261597	0,232695088	725,1270142	0,699097991	725,1270142	1,119585276	725,1270142	0,632809401	725,1261597	0,432461828	725,1168823	0,380170256	725,1168823	0,307172328	725,1168823	0,392246008
725,1519165	0,797792852	725,151062	0,238979131	725,1417847	0,369532168	725,1417847	0,423383385	725,151062	0,208082125	725,1519165	0,757410705	725,1519165	1,044532299	725,1519165	0,653172731	725,151062	0,335046947	725,1417847	0,391939729	725,1417847	0,257330656	725,1417847	0,362085342
725,1768188	0,54046607	725,1759644	0,152196169	725,166687	0,275640905	725,166687	0,291549593	725,1759644	0,147152469	725,1768188	0,645201325	725,1768188	0,801475704	725,1768188	0,530132532	725,1759644	0,209572613	725,166687	0,325953156	725,166687	0,199373916	725,166687	0,280684978
725,2017212	0,398807496	725,2008667	0,154233888	725,1915894	0,181501955	725,1915894	0,170786083	725,2008667	0,15470615	725,2017212	0,549567163	725,2017212	0,622177064	725,2017212	0,433450967	725,2008667	0,200436801	725,1915894	0,234916851	725,1915894	0,109198168	725,1915894	0,177840814
725,2266235	0,343305022	725,225769	0,141254291	725,2164917	0,157300204	725,2164917	0,16454339	725,225769	0,128893346	725,2266235	0,456135213	725,2266235	0,510330439	725,2266235	0,369321913	725,225769	0,172619104	725,2164917	0,198859453	725,2164917	0,111788377	725,2164917	0,157417625
725,2515259	0,238622293	725,2506714	0,086323299	725,241394	0,117645547	725,241394	0,144571155	725,2506714	0,07796225	725,2515259	0,317641497	725,2515259	0,34368822	725,2515259	0,245279521	725,2506714	0,106864713	725,241394	0,151281819	725,241394	0,115606964	725,241394	0,126613468
725,2764282	0,183264703	725,2755737	0,110516563	725,2662964	0,078397401	725,2662964	0,097777493	725,2755737	0,09576717	725,2764282	0,248837352	725,2764282	0,252770454	725,2764282	0,184781283	725,2755737	0,142505929	725,2662964	0,094445929	725,2662964	0,074333683	725,2662964	0,079507679
725,3013306	0,222430363	725,3004761	0,138968855	725,2911987	0,101885073	725,2911987	0,140837789	725,3004761	0,096774079	725,3013306	0,223994508	725,3013306	0,249003008	725,3013306	0,187307626	725,3004761	0,19472155	725,2911987	0,102725156	725,2911987	0,111908421	725,2911987	0,10112758
725,3262329	0,210550427	725,3253784	0,132270768	725,3161011	0,111400597	725,3161011	0,19406186	725,3253784	0,074217521	725,3262329	0,152947694	725,3262329	0,198690757	725,3262329	0,142421529	725,3253784	0,230269998	725,3161011	0,104870349	725,3161011	0,170327753	725,3161011	0,126270995
725,3511353	0,223337755	725,3502808	0,271910787	725,3410645	0,125462636	725,3410645	0,24016197	725,3502808	0,126680627	725,3511353	0,121415459	725,3511353	0,158606723	725,3511353	0,122119993	725,3502808	0,446506947	725,3410645	0,092750058	725,3410645	0,213627562	725,3410645	0,122318149
725,3760376	0,350406557	725,3751831	0,498873025	725,3659668	0,234124109	725,3659668	0,42200461	725,3751831	0,231277481	725,3760376	0,156622931	725,3760376	0,223177716	725,3760376	0,166474923	725,3751831	0,749022841	725,3659668	0,161226079	725,3659668	0,368539721	725,3659668	0,222503871
725,4009399	0,536822855	725,4000854	0,70466572	725,3908691	0,36423561	725,3908691	0,607479453	725,4000854	0,333744019	725,4009399	0,179721579	725,4009399	0,347964078	725,4009399	0,238545239	725,4000854	0,976903975	725,3908691	0,260061353	725,3908691	0,535822928	725,3908691	0,367960304
725,4258423	0,623618007	725,4249878	0,901774585	725,4157715	0,482349396	725,4157715	0,679277956	725,4249878	0,501001298	725,4258423	0,211944237	725,4258423	0,444519848	725,4258423	0,330144048	725,4249878	1,164404154	725,4157715	0,350455701	725,4157715	0,589388549	725,4157715	0,464091808
725,4507446	0,701877654	725,4498901	1,101789594	725,4406738	0,595724106	725,4406738	0,747540772	725,4498901	0,690461397	725,4507446	0,348218441	725,4507446	0,635902166	725,4507446	0,545268238	725,4498901	1,361815572	725,4406738	0,46887809	725,4406738	0,63742888	725,4406738	0,56186223
725,475647	0,719679356	725,4747925	1,274819374	725,4655762	0,694151461	725,4655762	0,821472764	725,4747925	0,885775506	725,475647	0,483502746	725,475647	0,78019011	725,475647	0,729829729	725,4747925	1,557613969	725,4655762	0,57144016	725,4655762	0,711574256	725,4655762	0,651333034
725,5005493	0,619317591	725,4996948	1,339237332	725,4904785	0,750456214	725,4904785	0,841171265	725,4996948	1,001644611	725,5005493	0,523523629	725,5005493	0,757979214	725,5005493	0,788892984	725,4996948	1,602247	725,4904785	0,649295151	725,4904785	0,770820498	725,4904785	0,708842218
725,5254517	0,524571002	725,5245972	1,373884678	725,5153809	0,778196096	725,5153809	0,698639274	725,5245972	1,154545307	725,5254517	0,583284557	725,5254517	0,714162409	725,5254517	0,822848856	725,5245972	1,472917914	725,5153809	0,66918838	725,5153809	0,648504674	725,5153809	0,701873541
725,550354	0,448658973	725,5494995	1,188690543	725,5402832	0,751953781	725,5402832	0,53477484	725,5494995	1,190251589	725,550354	0,604084253	725,550354	0,687223375	725,550354	0,821472108	725,5494995	1,112064958	725,5402832	0,707881391	725,5402832	0,48830989	725,5402832	0,691864967
725,5752563	0,293414652	725,5744019	0,836768687	725,5651855	0,580642819	725,5651855	0,348207802	725,5744019	1,044625401	725,5752563	0,518118203	725,5752563	0,539290547	725,5752563	0,683538258	725,5744019	0,69306922	725,5651855	0,645242572	725,5651855	0,328964949	725,5651855	0,552182317
725,6001587	0,209850654	725,5993042	0,598126352	725,5900879	0,365597814	725,5900879	0,186621726	725,5993042	0,855940461	725,6001587	0,438179463	725,6001587	0,396924525	725,6001587	0,545725524	725,5993042	0,469625771	725,5900879	0,473826021	725,5900879	0,173078403	725,5900879	0,331264555
725,625061	0,201113731	725,6242065	0,416249931	725,6149902	0,249802247	725,6149902	0,153253332	725,6242065	0,627251983	725,625061	0,373852938	725,625061	0,333987892	725,625061	0,440750986	725,6242065	0,315383404	725,6149902	0,34732458	725,6149902	0,131398603	725,6149902	0,242834732
725,6499634	0,128003225	725,6491089	0,225487083	725,6398926	0,161945105	725,6398926	0,12900953	725,6491089	0,397547632	725,6499634	0,250273436	725,6499634	0,225181296	725,6499634	0,292885691	725,6491089	0,16291821	725,6398926	0,237363249	725,6398926	0,114657894	725,6398926	0,176622018
725,6748657	0,081114322	725,6740112	0,167718589	725,6647949	0,092628315	725,6647949	0,068877846	725,6740112	0,28831169	725,6748657	0,172440469	725,6748657	0,142899141	725,6748657	0,195409849	725,6740112	0,134071991	725,6647949	0,134948641	725,6647949	0,063382797	725,6647949	0,091522731
725,6997681	0,114438504	725,6989746	0,149397507	725,6896973	0,089164808	725,6896973	0,08200562	725,6989746	0,214833364	725,6997681	0,15607439	725,6997681	0,154198557	725,6997681	0,172193214	725,6989746	0,129511222	725,6896973	0,114062391	725,6896973	0,068497829	725,6896973	0,090151615
725,7246704	0,11337281	725,723877	0,072407454	725,7145996	0,082114615	725,7145996	0,082576126	725,723877	0,116330042	725,7246704	0,125025541	725,7246704	0,144893467	725,7246704	0,140329972	725,723877	0,061559249	725,7145996	0,101501346	725,7145996	0,080966614	725,7145996	0,092581593
725,7495728	0,056020085	725,7487793	0,068698257	725,739502	0,044250928	725,739502	0,038022403	725,7487793	0,098465525	725,7495728	0,066441536	725,7495728	0,085145012	725,7495728	0,082254604	725,7487793	0,060179736	725,739502	0,05459271	725,739502	0,036251105	725,739502	0,042362247
725,7744751	0,058402352	725,7736816	0,09241385	725,7644043	0,05043966	725,7644043	0,043944646	725,7736816	0,102322482	725,7744751	0,079043753	725,7744751	0,081091344	725,7744751	0,081735902	725,7736816	0,084585704	725,7644043	0,057951283	725,7644043	0,037302818	725,7644043	0,042690385
725,7993774	0,074881203	725,798584	0,071991242	725,7893066	0,058119766	725,7893066	0,062995963	725,798584	0,080198169	725,7993774	0,082037419	725,7993774	0,101573646	725,7993774	0,090288334	725,798584	0,061705269	725,7893066	0,065726377	725,7893066	0,063871734	725,7893066	0,059906308
725,8243408	0,04409175	725,8234863	0,036393389	725,814209	0,038534556	725,814209	0,04633943	725,8234863	0,045241404	725,8243408	0,042756557	725,8243408	0,051942572	725,8243408	0,048513729	725,8234863	0,031232087	725,814209	0,052483302	725,814209	0,053786457	725,814209	0,048578866
725,8492432	0,045103263	725,8483887	0,060103361	725,8391113	0,024760759	725,8391113	0,024560239	725,8483887	0,0593707	725,8492432	0,04344552	725,8492432	0,043579321	725,8492432	0,046042569	725,8483887	0,05712248	725,8391113	0,029327111	725,8391113	0,026608337	725,8391113	0,022798972
725,8741455	0,070098646	725,873291	0,068123676	725,8640137	0,042985264	725,8640137	0,050928187	725,873291	0,056156341	725,8741455	0,057268869	725,8741455	0,075545222	725,8741455	0,063651077	725,873291	0,063609309	725,8640137	0,04493675	725,8640137	0,049520165	725,8640137	0,046750676
725,8990479	0,045616284	725,8981934	0,035735253	725,888916	0,038679387	725,888916	0,056678694	725,8981934	0,033095349	725,8990479	0,026991988	725,8990479	0,049095903	725,8990479	0,039627835	725,8981934	0,034749568	725,888916	0,044634528	725,888916	0,066847421	725,888916	0,049523793
725,9239502	0,048603546	725,9230957	0,056114331	725,9138184	0,024281342	725,9138184	0,035257686	725,9230957	0,049956542	725,9239502	0,033562802	725,9239502	0,041100651	725,9239502	0,036713611	725,9230957	0,067560345	725,9138184	0,02755578	725,9138184	0,038706619	725,9138184	0,028090833
725,9488525	0,112374358	725,947998	0,081018455	725,9387817	0,048459046	725,9387817	0,091552183	725,947998	0,055178341	725,9488525	0,053637438	725,9488525	0,075653382	725,9488525	0,06439206	725,947998	0,112066828	725,9387817	0,045932908	725,9387817	0,072111078	725,9387817	0,051713515
725,9737549	0,182797968	725,9729004	0,062277533	725,9636841	0,059322707	725,9636841	0,170132831	725,9729004	0,036016505	725,9737549	0,035029944	725,9737549	0,074459329	725,9737549	0,052240197	725,9729004	0,134914666	725,9636841	0,054476999	725,9636841	0,129348218	725,9636841	0,079422064
725,9986572	0,409743071	725,9978027	0,126683518	725,9885864	0,067501158	725,9885864	0,258878082	725,9978027	0,064926066	725,9986572	0,046438381	725,9986572	0,109115228	725,9986572	0,061041567	725,9978027	0,313768387	725,9885864	0,044519041	725,9885864	0,155721858	725,9885864	0,068077311
726,0235596	0,897774756	726,0227051	0,235189125	726,0134888	0,163228869	726,0134888	0,510063767	726,0227051	0,106558636	726,0235596	0,124833785	726,0235596	0,30493623	726,0235596	0,136481404	726,0227051	0,544556558	726,0134888	0,09346012	726,0134888	0,295848459	726,0134888	0,153347731
726,0484619	1,440070152	726,0476074	0,27039817	726,0383911	0,27328673	726,0383911	0,744500041	726,0476074	0,114870824	726,0484619	0,21456705	726,0484619	0,56801039	726,0484619	0,232847184	726,0476074	0,648967683	726,0383911	0,164792791	726,0383911	0,451028973	726,0383911	0,276956886
726,0733643	1,676908374	726,0725098	0,341592371	726,0632935	0,351478398	726,0632935	0,742500186	726,0725098	0,191239223	726,0733643	0,317536116	726,0733643	0,825173914	726,0733643	0,333247542	726,0725098	0,69995451	726,0632935	0,218996137	726,0632935	0,448746055	726,0632935	0,338002294
726,0982666	1,692345142	726,0974121	0,377412587	726,0881958	0,423400223	726,0881958	0,655977964	726,0974121	0,247789308	726,0982666	0,529417276	726,0982666	1,130642653	726,0982666	0,525052547	726,0974121	0,634626627	726,0881958	0,329054564	726,0881958	0,405234337	726,0881958	0,401485473
726,1231689	1,432139635	726,1223145	0,272143245	726,1130981	0,40315035	726,1130981	0,531298757	726,1223145	0,212052464	726,1231689	0,783393025	726,1231689	1,39877224	726,1231689	0,730612636	726,1223145	0,443115592	726,1130981	0,383786976	726,1130981	0,354894459	726,1130981	0,408570886
726,1480713	0,975710928	726,1472168	0,22532934	726,1380005	0,323079646	726,1380005	0,394020051	726,1472168	0,200793609	726,1480713	0,854253471	726,1480713	1,289361954	726,1480713	0,74540621	726,1472168	0,3468692	726,1380005	0,342674404	726,1380005	0,260628462	726,1380005	0,334719867
726,1729736	0,698090792	726,1721191	0,212329999	726,1629028	0,263320476	726,1629028	0,288912982	726,1721191	0,199942604	726,1729736	0,840108097	726,1729736	1,038974762	726,1729736	0,678888977	726,1721191	0,312187761	726,1629028	0,293343425	726,1629028	0,189516127	726,1629028	0,257465571
726,197876	0,542887092	726,1970215	0,17621091	726,1878052	0,226322368	726,1878052	0,235021591	726,1970215	0,16278477	726,197876	0,717153847	726,197876	0,832677543	726,197876	0,569683552	726,1970215	0,2387283	726,1878052	0,264653116	726,1878052	0,159722388	726,1878052	0,225326493
726,2227783	0,358713984	726,2219238	0,100217372	726,2127075	0,165248275	726,2127075	0,179170191	726,2219238	0,096919172	726,2227783	0,510044336	726,2227783	0,58319068	726,2227783	0,396810412	726,2219238	0,139580607	726,2127075	0,208868325	726,2127075	0,136316687	726,2127075	0,178043276
726,2476807	0,259651273	726,2468262	0,109277584	726,2376099	0,103787936	726,2376099	0,112437218	726,2468262	0,10226199	726,2476807	0,389962018	726,2476807	0,415262103	726,2476807	0,29678449	726,2468262	0,154561058	726,2376099	0,130468071	726,2376099	0,082195029	726,2376099	0,102097034
726,272583	0,291311026	726,2717285	0,11980091	726,2625122	0,108740591	726,2625122	0,147841543	726,2717285	0,096910328	726,272583	0,330382615	726,272583	0,361689985	726,272583	0,259320498	726,2717285	0,178981721	726,2625122	0,121427722	726,2625122	0,102126248	726,2625122	0,108788364
726,2974854	0,270034134	726,2966309	0,087269947	726,2874146	0,101480611	726,2874146	0,178498462	726,2966309	0,060810696	726,2974854	0,222843125	726,2974854	0,267492354	726,2974854	0,180958867	726,2966309	0,167129979	726,2874146	0,109094687	726,2874146	0,138527319	726,2874146	0,115507998
726,3223877	0,266120195	726,3215332	0,1573423	726,3123169	0,093863092	726,3123169	0,177612096	726,3215332	0,094053149	726,3223877	0,174856603	726,3223877	0,218435675	726,3223877	0,150430635	726,3215332	0,284890085	726,3123169	0,07882601	726,3123169	0,126915127	726,3123169	0,091068976
726,34729	0,348845482	726,3464355	0,30693835	726,3372192	0,149392128	726,3372192	0,278663337	726,3464355	0,147953033	726,34729	0,202934265	726,34729	0,269745827	726,34729	0,192289785	726,3464355	0,505577087	726,3372192	0,113156907	726,3372192	0,219396695	726,3372192	0,14949283
726,3721924	0,412068546	726,3713379	0,5172019	726,3621216	0,220918402	726,3621216	0,442799509	726,3713379	0,204497576	726,3721924	0,187674299	726,3721924	0,286054373	726,3721924	0,202694044	726,3713379	0,872795761	726,3621216	0,161392123	726,3621216	0,376592189	726,3621216	0,235920742
726,3970947	0,579494178	726,3963013	1,156185389	726,3870239	0,314891607	726,3870239	0,669670224	726,3963013	0,458437681	726,3970947	0,205760479	726,3970947	0,325885773	726,3970947	0,250725418	726,3963013	1,87793076	726,3870239	0,201435998	726,3870239	0,569238007	726,3870239	0,316745549
726,4219971	0,952358603	726,4212036	2,543835163	726,4119263	0,589424133	726,4119263	1,343815804	726,4212036	1,02406919	726,4219971	0,286829263	726,4219971	0,467202574	726,4219971	0,382841945	726,4212036	3,792704344	726,4119263	0,367467552	726,4119263	1,12024641	726,4119263	0,589280784
726,4468994	1,666905999	726,446106	4,616309643	726,4368286	1,123538017	726,4368286	2,513804913	726,446106	2,125244856	726,4468994	0,405423939	726,4468994	0,721058965	726,4468994	0,610102355	726,446106	6,019680977	726,4368286	0,668506682	726,4368286	2,035588026	726,4368286	1,160467863
726,4718018	2,836760521	726,4710083	6,716337204	726,461731	1,951950669	726,461731	3,291367769	726,4710083	3,982358932	726,4718018	0,670689881	726,4718018	1,244405985	726,4718018	1,119941831	726,4710083	7,221758842	726,461731	1,187438965	726,461731	2,575155497	726,461731	2,010105133
726,4967041	3,547920704	726,4959106	7,539041996	726,4866333	2,623725414	726,4866333	3,174510956	726,4959106	5,561653137	726,4967041	1,361621737	726,4967041	2,164476633	726,4967041	2,202283382	726,4959106	6,936441898	726,4866333	1,811904073	726,4866333	2,466566324	726,4866333	2,676939487
726,5216064	3,094752312	726,520813	7,164653301	726,5115356	2,880173206	726,5115356	2,546794891	726,520813	6,660357475	726,5216064	2,424036503	726,5216064	3,102156162	726,5216064	3,630230427	726,520813	5,743957996	726,5115356	2,442724705	726,5115356	1,992513657	726,5115356	2,951146364
726,5465698	2,044899702	726,5457153	5,662147999	726,536499	2,46122241	726,536499	1,60778141	726,5457153	6,891010284	726,5465698	3,306446552	726,5465698	3,251520395	726,5465698	4,476976871	726,5457153	3,913501501	726,536499	2,759558201	726,536499	1,277141809	726,536499	2,55217433
726,5714722	1,234993935	726,5706177	4,015583515	726,5614014	1,671663404	726,5614014	0,9082582	726,5706177	5,937130451	726,5714722	3,496801376	726,5714722	2,629496574	726,5714722	4,239012241	726,5706177	2,528848886	726,5614014	2,321448565	726,5614014	0,699310839	726,5614014	1,719214439
726,5963745	0,798542082	726,59552	2,69169879	726,5863037	1,065863132	726,5863037	0,542699337	726,59552	4,514992237	726,5963745	2,94888401	726,5963745	1,899820209	726,5963745	3,332109213	726,59552	1,590055108	726,5863037	1,654546499	726,5863037	0,415164411	726,5863037	1,082074523
726,6212769	0,483381629	726,6204224	1,683632612	726,6112061	0,64111793	726,6112061	0,343377441	726,6204224	3,164564371	726,6212769	2,112855673	726,6212769	1,265962124	726,6212769	2,305579901	726,6204224	0,954357207	726,6112061	1,077582717	726,6112061	0,284724385	726,6112061	0,663953125
726,6461792	0,295627087	726,6453247	1,109993696	726,6361084	0,361625522	726,6361084	0,189455077	726,6453247	2,193399668	726,6461792	1,427837372	726,6461792	0,805656016	726,6461792	1,533489466	726,6453247	0,640222013	726,6361084	0,641942561	726,6361084	0,154610917	726,6361084	0,365115643
726,6710815	0,248193055	726,6702271	0,765114665	726,6610107	0,252764404	726,6610107	0,163294941	726,6702271	1,492430091	726,6710815	1,00207901	726,6710815	0,575204611	726,6710815	1,058225393	726,6702271	0,461442322	726,6610107	0,412002176	726,6610107	0,129554659	726,6610107	0,259052247
726,6959839	0,177708223	726,6951294	0,482695073	726,6859131	0,181160316	726,6859131	0,146699548	726,6951294	0,963841498	726,6959839	0,653065979	726,6959839	0,380062103	726,6959839	0,693579793	726,6951294	0,275933892	726,6859131	0,285127103	726,6859131	0,12179365	726,6859131	0,199823871
726,7208862	0,106311306	726,7200317	0,353530169	726,7108154	0,104743965	726,7108154	0,073971666	726,7200317	0,678222895	726,7208862	0,417115569	726,7208862	0,24074012	726,7208862	0,441198379	726,7200317	0,217366248	726,7108154	0,16860427	726,7108154	0,066313282	726,7108154	0,109868549
726,7457886	0,120833859	726,7449341	0,301708996	726,7357178	0,096928895	726,7357178	0,074129023	726,7449341	0,507579327	726,7457886	0,314711064	726,7457886	0,215137362	726,7457886	0,339910001	726,7449341	0,206808463	726,7357178	0,137354717	726,7357178	0,059306335	726,7357178	0,091340192
726,7706909	0,126621723	726,7698364	0,191673964	726,7606201	0,085790858	726,7606201	0,086425476	726,7698364	0,333472431	726,7706909	0,256721348	726,7706909	0,202913895	726,7706909	0,276772171	726,7698364	0,112758823	726,7606201	0,119303085	726,7606201	0,079495244	726,7606201	0,096667938
726,7955933	0,066982269	726,7947388	0,146771982	726,7855225	0,044542991	726,7855225	0,038794711	726,7947388	0,25500828	726,7955933	0,162956163	726,7955933	0,117645703	726,7955933	0,184567913	726,7947388	0,093156785	726,7855225	0,064978465	726,7855225	0,039811172	726,7855225	0,047746819
726,8204956	0,062739491	726,8196411	0,160992801	726,8104248	0,042925153	726,8104248	0,039763317	726,8196411	0,227089956	726,8204956	0,128705084	726,8204956	0,091879867	726,8204956	0,146358073	726,8196411	0,121601105	726,8104248	0,055767749	726,8104248	0,037473995	726,8104248	0,040335938
726,8453979	0,089199834	726,8445435	0,120879441	726,8353271	0,059606798	726,8353271	0,075825468	726,8445435	0,165497988	726,8453979	0,121418424	726,8453979	0,109173961	726,8453979	0,141227409	726,8445435	0,093051821	726,8353271	0,071858466	726,8353271	0,068690814	726,8353271	0,062279869
726,8703003	0,064626426	726,8694458	0,084701307	726,8602295	0,047892407	726,8602295	0,061703485	726,8694458	0,114078484	726,8703003	0,061787196	726,8703003	0,071306758	726,8703003	0,082534254	726,8694458	0,061535358	726,8602295	0,056197997	726,8602295	0,067267627	726,8602295	0,056624573
726,8952026	0,057981059	726,8943481	0,103477448	726,8851318	0,033391707	726,8851318	0,036463026	726,8943481	0,123154119	726,8952026	0,052061055	726,8952026	0,059114017	726,8952026	0,064953908	726,8943481	0,085513368	726,8851318	0,033329207	726,8851318	0,036239836	726,8851318	0,033375442
726,920105	0,112368762	726,9192505	0,114679225	726,9100342	0,04871393	726,9100342	0,070513353	726,9192505	0,115333878	726,920105	0,077115767	726,920105	0,097584665	726,920105	0,089008249	726,9192505	0,107291423	726,9100342	0,050506923	726,9100342	0,061848827	726,9100342	0,052522112
726,9450073	0,12956731	726,9441528	0,076740421	726,9349365	0,049440611	726,9349365	0,107083522	726,9441528	0,073053531	726,9450073	0,051652677	726,9450073	0,084766813	726,9450073	0,06630367	726,9441528	0,092992075	726,9349365	0,056379206	726,9349365	0,091877483	726,9349365	0,064190634
726,9699097	0,226727366	726,9690552	0,120501399	726,9598389	0,043734659	726,9598389	0,142265305	726,9690552	0,091357365	726,9699097	0,05486463	726,9699097	0,08201053	726,9699097	0,062655091	726,9690552	0,216108963	726,9598389	0,036813542	726,9598389	0,092992298	726,9598389	0,042748295
726,994812	0,609183371	726,9939575	0,207725212	726,9847412	0,101748385	726,9847412	0,356216371	726,9939575	0,119974725	726,994812	0,103376403	726,994812	0,18417567	726,994812	0,112554565	726,9939575	0,451511204	726,9847412	0,064904511	726,9847412	0,20823589	726,9847412	0,09468507
727,0197144	1,22251749	727,0188599	0,265850544	727,0096436	0,19265002	727,0096436	0,660319865	727,0188599	0,113014422	727,0197144	0,126496807	727,0197144	0,364140838	727,0197144	0,156290665	727,0188599	0,722474694	727,0096436	0,110329576	727,0096436	0,395373464	727,0096436	0,199369311
727,0446167	2,173940659	727,0437622	0,447568774	727,0345459	0,301200658	727,0345459	0,978849053	727,0437622	0,205972403	727,0446167	0,256916523	727,0446167	0,703843057	727,0446167	0,278125912	727,0437622	1,172929406	727,0345459	0,155205101	727,0345459	0,593901813	727,0345459	0,286328495
727,069519	3,392340422	727,0687256	0,683341503	727,0594482	0,512058556	727,0594482	1,397238731	727,0687256	0,333415151	727,069519	0,562693775	727,069519	1,384350061	727,069519	0,588582039	727,0687256	1,589402676	727,0594482	0,300921351	727,0594482	0,894555092	727,0594482	0,486216694
727,0944214	4,108992577	727,0936279	0,79144901	727,0843506	0,720067263	727,0843506	1,66052103	727,0936279	0,399874598	727,0944214	0,976345778	727,0944214	2,213376522	727,0944214	0,977615535	727,0936279	1,657878518	727,0843506	0,475217551	727,0843506	1,136780739	727,0843506	0,717772782
727,1193237	3,966177702	727,1185303	0,850542963	727,1092529	0,815002918	727,1092529	1,458706856	727,1185303	0,521276891	727,1193237	1,31896925	727,1193237	2,765840769	727,1193237	1,27512753	727,1185303	1,48345089	727,1092529	0,606086314	727,1092529	1,012640953	727,1092529	0,831407845
727,1442261	3,368169308	727,1434326	0,825142741	727,1342163	0,81876719	727,1342163	1,074712634	727,1434326	0,618364036	727,1442261	1,722614765	727,1442261	3,133437157	727,1442261	1,586739898	727,1434326	1,194570303	727,1342163	0,738670707	727,1342163	0,754043043	727,1342163	0,845641136
727,1691284	2,45019412	727,168335	0,677521765	727,1591187	0,688713193	727,1591187	0,742776334	727,168335	0,588427901	727,1691284	2,070923805	727,1691284	3,154281139	727,1691284	1,841159105	727,168335	0,891144812	727,1591187	0,769105077	727,1591187	0,526992023	727,1591187	0,737178206
727,1940308	1,601457357	727,1932373	0,513082087	727,184021	0,512544692	727,184021	0,49890995	727,1932373	0,511620522	727,1940308	1,995222092	727,1940308	2,560729027	727,1940308	1,699791431	727,1932373	0,641471267	727,184021	0,654248059	727,184021	0,359710634	727,184021	0,553305507
727,2189331	1,045467496	727,2181396	0,396014988	727,2089233	0,374030292	727,2089233	0,342781037	727,2181396	0,433187753	727,2189331	1,674355745	727,2189331	1,868561387	727,2189331	1,373361468	727,2181396	0,476160914	727,2089233	0,51089859	727,2089233	0,238709345	727,2089233	0,3914873
727,2438354	0,784512758	727,243042	0,310709357	727,2338257	0,269907445	727,2338257	0,281757206	727,243042	0,337909728	727,2438354	1,310505033	727,2438354	1,349500895	727,2438354	1,054331422	727,243042	0,388633966	727,2338257	0,37923798	727,2338257	0,201054543	727,2338257	0,283277571
727,2687378	0,571978509	727,2679443	0,208687171	727,258728	0,196457073	727,258728	0,253115475	727,2679443	0,222556546	727,2687378	0,912537813	727,2687378	0,931911469	727,2687378	0,720026553	727,2679443	0,288238823	727,258728	0,269161671	727,258728	0,196984351	727,258728	0,220545933
727,2937012	0,462358356	727,2928467	0,22812371	727,2836304	0,139180526	727,2836304	0,214882314	727,2928467	0,203558475	727,2937012	0,638873041	727,2937012	0,653899968	727,2937012	0,509032726	727,2928467	0,360530943	727,2836304	0,173732042	727,2836304	0,157820389	727,2836304	0,147505373
727,3186035	0,478759229	727,317749	0,323414028	727,3085327	0,180984482	727,3085327	0,352395326	727,317749	0,214781806	727,3186035	0,501767516	727,3186035	0,547599912	727,3186035	0,422045499	727,317749	0,604835331	727,3085327	0,166999057	727,3085327	0,257514626	727,3085327	0,178702995
727,3435059	0,539716482	727,3426514	0,488709241	727,3334351	0,257619441	727,3334351	0,718298197	727,3426514	0,215252936	727,3435059	0,378473192	727,3435059	0,471916318	727,3435059	0,342782468	727,3426514	1,040193439	727,3334351	0,185306117	727,3334351	0,531841397	727,3334351	0,28564167
727,3684082	0,693056524	727,3675537	0,915510118	727,3583374	0,447248518	727,3583374	1,285487771	727,3675537	0,400292933	727,3684082	0,33865726	727,3684082	0,442724586	727,3684082	0,321142197	727,3675537	1,726719141	727,3583374	0,223212734	727,3583374	0,885295331	727,3583374	0,500857234
727,3933105	0,972141564	727,3924561	1,456010699	727,3832397	0,892371416	727,3832397	1,774439692	727,3924561	0,751062751	727,3933105	0,420675963	727,3933105	0,572453499	727,3933105	0,450175852	727,3924561	2,326675653	727,3832397	0,436586171	727,3832397	1,179960012	727,3832397	0,984398603
727,4182129	1,165125132	727,4173584	1,968947172	727,4081421	1,319608331	727,4081421	1,844965935	727,4173584	1,144134641	727,4182129	0,562562346	727,4182129	0,753657222	727,4182129	0,649302661	727,4173584	2,799351692	727,4081421	0,777104914	727,4081421	1,283594847	727,4081421	1,438294888
727,4431152	1,342528582	727,4422607	2,717947006	727,4330444	1,43912518	727,4330444	1,840988278	727,4422607	1,679121494	727,4431152	0,696313322	727,4431152	0,873880088	727,4431152	0,81109333	727,4422607	3,532742023	727,4330444	1,036040068	727,4330444	1,361999512	727,4330444	1,548446655
727,4680176	1,703493595	727,4671631	3,625068188	727,4579468	1,572159171	727,4579468	2,028173923	727,4671631	2,404040575	727,4680176	0,91265738	727,4680176	1,079392552	727,4680176	1,064314961	727,4671631	4,117311954	727,4579468	1,228416562	727,4579468	1,532278657	727,4579468	1,639027953
727,4929199	2,091135979	727,4920654	4,005670547	727,4828491	1,77984488	727,4828491	1,925323367	727,4920654	3,144773483	727,4929199	1,219805956	727,4929199	1,450475097	727,4929199	1,495279908	727,4920654	3,820135355	727,4828491	1,437865496	727,4828491	1,481779456	727,4828491	1,822988868
727,5178223	1,924153209	727,5169678	3,804437876	727,5077515	1,712523103	727,5077515	1,387080193	727,5169678	3,590107203	727,5178223	1,508104205	727,5178223	1,790986061	727,5178223	1,992233634	727,5169678	3,190824509	727,5077515	1,607189775	727,5077515	1,077473402	727,5077515	1,737577438
727,5427246	1,425851583	727,5418701	3,323482752	727,5326538	1,483299613	727,5326538	0,998399377	727,5418701	3,726516962	727,5427246	1,885461211	727,5427246	1,940850616	727,5427246	2,434062719	727,5418701	2,533164263	727,5326538	1,61382544	727,5326538	0,760957539	727,5326538	1,487429023
727,567627	1,002381444	727,5667725	2,476039648	727,5575562	1,194679737	727,5575562	0,746375084	727,5667725	3,340111017	727,567627	2,042428255	727,567627	1,794136763	727,567627	2,492569685	727,5667725	1,717800498	727,5575562	1,471288204	727,5575562	0,561837673	727,5575562	1,191863418
727,5925293	0,640757382	727,5916748	1,659299254	727,5824585	0,809743702	727,5824585	0,471536189	727,5916748	2,579964876	727,5925293	1,777047992	727,5925293	1,345885396	727,5925293	2,049376726	727,5916748	1,04889524	727,5824585	1,116738439	727,5824585	0,371809274	727,5824585	0,814168334
727,6174316	0,390942603	727,6165771	1,114358783	727,6073608	0,48172465	727,6073608	0,25904718	727,6165771	1,905553818	727,6174316	1,361238003	727,6174316	0,932260811	727,6174316	1,500062466	727,6165771	0,679062545	727,6073608	0,747177362	727,6073608	0,198552802	727,6073608	0,483745903
727,642334	0,319155842	727,6414795	0,755328238	727,6322632	0,326878071	727,6322632	0,206771627	727,6414795	1,347384095	727,642334	1,009033918	727,642334	0,675351441	727,642334	1,077059865	727,6414795	0,475182772	727,6322632	0,511107981	727,6322632	0,155393079	727,6322632	0,320482135
727,6672363	0,236391634	727,6663818	0,456066191	727,6571655	0,223451033	727,6571655	0,182890773	727,6663818	0,874770105	727,6672363	0,675409675	727,6672363	0,459408373	727,6672363	0,725977242	727,6663818	0,276777864	727,6571655	0,341059923	727,6571655	0,15022178	727,6571655	0,236624777
727,6921387	0,158636838	727,6912842	0,328737706	727,6820679	0,134358481	727,6820679	0,110489026	727,6912842	0,611567795	727,6921387	0,447861135	727,6921387	0,289707631	727,6921387	0,467964292	727,6912842	0,221039221	727,6820679	0,196896806	727,6820679	0,082446635	727,6820679	0,132994801
727,717041	0,184320658	727,7161865	0,270724088	727,7069702	0,12259037	727,7069702	0,108705401	727,7161865	0,453630447	727,717041	0,3433038	727,717041	0,258402795	727,717041	0,354103059	727,7161865	0,212016851	727,7069702	0,158518836	727,7069702	0,078046627	727,7069702	0,117453068
727,7419434	0,168380708	727,7410889	0,16447854	727,7319336	0,111936606	727,7319336	0,114683256	727,7410889	0,282301575	727,7419434	0,243765503	727,7419434	0,212237313	727,7419434	0,261691868	727,7410889	0,122328602	727,7319336	0,144782677	727,7319336	0,101036221	727,7319336	0,12053559
727,7668457	0,115017816	727,7660522	0,129337192	727,7568359	0,061873022	727,7568359	0,059659634	727,7660522	0,213870585	727,7668457	0,159119129	727,7668457	0,141878888	727,7668457	0,171048775	727,7660522	0,102663018	727,7568359	0,084384963	727,7568359	0,052815404	727,7568359	0,066933736
727,791748	0,129329339	727,7909546	0,151208639	727,7817383	0,062141217	727,7817383	0,059520599	727,7909546	0,19544749	727,791748	0,156717181	727,791748	0,147057071	727,791748	0,164914563	727,7909546	0,126341462	727,7817383	0,073933505	727,7817383	0,046067301	727,7817383	0,057666738
727,8166504	0,135509714	727,8158569	0,089634493	727,8066406	0,071324989	727,8066406	0,086966917	727,8158569	0,11611253	727,8166504	0,156877801	727,8166504	0,164786473	727,8166504	0,158807665	727,8158569	0,073692434	727,8066406	0,083615594	727,8066406	0,078604601	727,8066406	0,08210627
727,8415527	0,08744695	727,8407593	0,062468175	727,831543	0,037313975	727,831543	0,045714945	727,8407593	0,089004532	727,8415527	0,088295817	727,8415527	0,104534999	727,8415527	0,103416719	727,8407593	0,053844519	727,831543	0,046504065	727,831543	0,048421476	727,831543	0,043592669
727,8664551	0,069391221	727,8656616	0,099326991	727,8564453	0,037947912	727,8564453	0,039211512	727,8656616	0,112756126	727,8664551	0,079937406	727,8664551	0,078795381	727,8664551	0,082098953	727,8656616	0,096754074	727,8564453	0,042257302	727,8564453	0,039593916	727,8564453	0,038285963
727,8913574	0,116973564	727,890564	0,094399437	727,8813477	0,049275123	727,8813477	0,066484652	727,890564	0,092192993	727,8913574	0,094295427	727,8913574	0,109939829	727,8913574	0,102638975	727,890564	0,090365641	727,8813477	0,053946689	727,8813477	0,056625415	727,8813477	0,049074352
727,9162598	0,098248638	727,9154663	0,052551229	727,90625	0,048137635	727,90625	0,08244931	727,9154663	0,055078376	727,9162598	0,062148951	727,9162598	0,0929453	727,9162598	0,071093395	727,9154663	0,061201058	727,90625	0,05633875	727,90625	0,078046553	727,90625	0,065549843
727,9411621	0,112746507	727,9403687	0,08249519	727,9311523	0,034257066	727,9311523	0,069221191	727,9403687	0,073092662	727,9411621	0,053505708	727,9411621	0,085335143	727,9411621	0,061143935	727,9403687	0,113800295	727,9311523	0,035547663	727,9311523	0,059027463	727,9311523	0,039527729
727,9660645	0,276930928	727,965271	0,136007845	727,9560547	0,063411668	727,9560547	0,171621248	727,965271	0,089668728	727,9660645	0,08635366	727,9660645	0,125923902	727,9660645	0,095758334	727,965271	0,228363007	727,9560547	0,057875257	727,9560547	0,111572489	727,9560547	0,067551531
727,9909668	0,608314335	727,9901733	0,155197382	727,980957	0,10204272	727,980957	0,345111489	727,9901733	0,066672139	727,9909668	0,07798291	727,9909668	0,180126667	727,9909668	0,096274368	727,9901733	0,36800319	727,980957	0,075015925	727,980957	0,229010656	727,980957	0,122248657
728,0159302	1,20795393	728,0150757	0,286622792	728,0058594	0,144611537	728,0058594	0,521607995	728,0150757	0,129674673	728,0159302	0,112105019	728,0159302	0,302389026	728,0159302	0,136899829	728,0150757	0,671874404	728,0058594	0,074451461	728,0058594	0,317608476	728,0058594	0,149298519
728,0408325	1,955864787	728,039978	0,462770402	728,0307617	0,277127624	728,0307617	0,771726847	728,039978	0,232877254	728,0408325	0,29120627	728,0408325	0,701590896	728,0408325	0,320428431	728,039978	0,986590862	728,0307617	0,15341121	728,0307617	0,470100522	728,0307617	0,274266362
728,0657349	2,517427683	728,0648804	0,514745772	728,0556641	0,415874928	728,0556641	0,94549793	728,0648804	0,272883922	728,0657349	0,545859456	728,0657349	1,193037629	728,0657349	0,564471185	728,0648804	1,071610093	728,0556641	0,266526163	728,0556641	0,618992567	728,0556641	0,423361212
728,0906372	2,621094465	728,0897827	0,559526026	728,0805664	0,467927456	728,0805664	0,926993191	728,0897827	0,35525012	728,0906372	0,84310919	728,0906372	1,643803239	728,0906372	0,822015762	728,0897827	1,056943536	728,0805664	0,335029691	728,0805664	0,614233136	728,0805664	0,47050941
728,1155396	2,344536066	728,1146851	0,587835789	728,1054688	0,512409627	728,1054688	0,826211274	728,1146851	0,424721718	728,1155396	1,192534208	728,1155396	2,009135723	728,1155396	1,064966321	728,1146851	0,959318459	728,1054688	0,416605473	728,1054688	0,556687415	728,1054688	0,508018434
728,1404419	1,961846113	728,1395874	0,475133866	728,1303711	0,50063163	728,1303711	0,672738373	728,1395874	0,374164224	728,1404419	1,3401649	728,1404419	2,078176737	728,1404419	1,169979215	728,1395874	0,708858371	728,1303711	0,470774531	728,1303711	0,475767523	728,1303711	0,528854251
728,1653442	1,499973774	728,1644897	0,370988786	728,1552734	0,391171873	728,1552734	0,444921136	728,1644897	0,336755544	728,1653442	1,351584792	728,1653442	1,910090446	728,1653442	1,131082416	728,1644897	0,523559868	728,1552734	0,421278715	728,1552734	0,320436597	728,1552734	0,406955719
728,1902466	1,045533776	728,1893921	0,35835135	728,1801758	0,299852312	728,1801758	0,306730211	728,1893921	0,340525657	728,1902466	1,250579715	728,1902466	1,544711471	728,1902466	1,011592627	728,1893921	0,468341768	728,1801758	0,351774842	728,1801758	0,212949246	728,1801758	0,300290555
728,2151489	0,803988039	728,2142944	0,304371595	728,2050781	0,273950249	728,2050781	0,285535693	728,2142944	0,287404001	728,2151489	1,071425557	728,2151489	1,22434473	728,2151489	0,868387222	728,2142944	0,393394589	728,2050781	0,323653221	728,2050781	0,209499404	728,2050781	0,273670822
728,2400513	0,578566492	728,2391968	0,198136613	728,2299805	0,213631094	728,2299805	0,239560917	728,2391968	0,195295259	728,2400513	0,796482861	728,2400513	0,886003971	728,2400513	0,644169807	728,2391968	0,270129681	728,2299805	0,259422153	728,2299805	0,189791635	728,2299805	0,228279829
728,2649536	0,443643898	728,2640991	0,198273093	728,2548828	0,145419151	728,2548828	0,173739374	728,2640991	0,186820075	728,2649536	0,597063899	728,2649536	0,631912291	728,2649536	0,48045218	728,2640991	0,287836134	728,2548828	0,17253679	728,2548828	0,13390775	728,2548828	0,147990763
728,289856	0,429331332	728,2890015	0,222556889	728,2797852	0,156450793	728,2797852	0,205733269	728,2890015	0,176889688	728,289856	0,486620098	728,289856	0,536630332	728,289856	0,398281813	728,2890015	0,32769987	728,2797852	0,16168052	728,2797852	0,156627059	728,2797852	0,15315713
728,3147583	0,391333401	728,3139038	0,200145185	728,3046875	0,164724395	728,3046875	0,263730526	728,3139038	0,131921411	728,3147583	0,365474522	728,3147583	0,446420252	728,3147583	0,313204587	728,3139038	0,350336671	728,3046875	0,156687185	728,3046875	0,216778159	728,3046875	0,174290597
728,3396606	0,378103763	728,3388062	0,314414442	728,3296509	0,164849743	728,3296509	0,331558675	728,3388062	0,171173632	728,3396606	0,291221172	728,3396606	0,342426062	728,3396606	0,246154889	728,3388062	0,579264998	728,3296509	0,123992138	728,3296509	0,257028878	728,3296509	0,160268798
728,364563	0,537047923	728,3637085	0,54611212	728,3545532	0,273324817	728,3545532	0,603579879	728,3637085	0,272275329	728,364563	0,311374187	728,364563	0,385681093	728,364563	0,285975158	728,3637085	0,948348761	728,3545532	0,17412661	728,3545532	0,440529227	728,3545532	0,268265694
728,3894653	0,719183624	728,3886108	0,763671815	728,3794556	0,457665384	728,3794556	0,889501393	728,3886108	0,383162022	728,3894653	0,313229978	728,3894653	0,450446367	728,3894653	0,330760211	728,3886108	1,207812548	728,3794556	0,274279505	728,3794556	0,652096093	728,3794556	0,483836114
728,4143677	0,830117345	728,4135132	1,053886056	728,4043579	0,629906654	728,4043579	0,926274717	728,4135132	0,62324214	728,4143677	0,360435784	728,4143677	0,53246361	728,4143677	0,420232624	728,4135132	1,458916426	728,4043579	0,382876337	728,4043579	0,680807829	728,4043579	0,661081791
728,43927	0,940945804	728,4384155	1,38575542	728,4292603	0,785393596	728,4292603	0,926058352	728,4384155	0,911753297	728,43927	0,540202677	728,43927	0,734984756	728,43927	0,63261801	728,4384155	1,728196144	728,4292603	0,550737143	728,4292603	0,701843262	728,4292603	0,792307615
728,4641724	1,007060766	728,4633789	1,601536274	728,4541626	0,858416915	728,4541626	0,982474923	728,4633789	1,128117919	728,4641724	0,670346797	728,4641724	0,868249416	728,4641724	0,782323241	728,4633789	1,82376647	728,4541626	0,691139638	728,4541626	0,783887863	728,4541626	0,86820507
728,4890747	0,9880867	728,4882813	1,745802283	728,4790649	0,865728855	728,4790649	0,900014162	728,4882813	1,367684841	728,4890747	0,723385215	728,4890747	0,881740928	728,4890747	0,862781048	728,4882813	1,771841645	728,4790649	0,724697411	728,4790649	0,724710047	728,4790649	0,848653793
728,5139771	0,92964071	728,5131836	1,748193145	728,5039673	0,864461184	728,5039673	0,746161461	728,5131836	1,59667933	728,5139771	0,82127732	728,5139771	0,936259329	728,5139771	1,008304834	728,5131836	1,588291168	728,5039673	0,775324821	728,5039673	0,5988065	728,5039673	0,825045586
728,5388794	0,806782544	728,5380859	1,574049234	728,5288696	0,803672969	728,5288696	0,641912043	728,5380859	1,613541126	728,5388794	0,938905597	728,5388794	1,017305017	728,5388794	1,167648911	728,5380859	1,329523206	728,5288696	0,817820907	728,5288696	0,516799271	728,5288696	0,772214293
728,5637817	0,585204422	728,5629883	1,307252526	728,553772	0,692587852	728,553772	0,530234993	728,5629883	1,495194316	728,5637817	0,910276771	728,5637817	0,910182178	728,5637817	1,143276453	728,5629883	1,050632238	728,553772	0,755965292	728,553772	0,427184492	728,553772	0,656225502
728,5886841	0,39739874	728,5878906	1,041194797	728,5786743	0,573140681	728,5786743	0,411044389	728,5878906	1,310907483	728,5886841	0,824445367	728,5886841	0,720984995	728,5886841	1,001269341	728,5878906	0,821649551	728,5786743	0,64470613	728,5786743	0,320164412	728,5786743	0,519379437
728,6135864	0,334866226	728,612793	0,809337258	728,6035767	0,49974069	728,6035767	0,343357503	728,612793	1,068930507	728,6135864	0,727330863	728,6135864	0,601746976	728,6135864	0,845419347	728,612793	0,628623426	728,6035767	0,549206674	728,6035767	0,259399682	728,6035767	0,440904707
728,6384888	0,234399036	728,6376953	0,541208029	728,628479	0,402039051	728,628479	0,276829004	728,6376953	0,777525306	728,6384888	0,547965288	728,6384888	0,446023703	728,6384888	0,639592171	728,6376953	0,404857308	728,628479	0,449222356	728,628479	0,229258329	728,628479	0,358590573
728,6633911	0,142217532	728,6625977	0,402501702	728,6533813	0,280482322	728,6533813	0,17005682	728,6625977	0,591919065	728,6633911	0,398992151	728,6633911	0,279778421	728,6633911	0,450505108	728,6625977	0,318740517	728,6533813	0,313654035	728,6533813	0,141019255	728,6533813	0,231324762
728,6882935	0,156411916	728,6875	0,341931403	728,6782837	0,238123283	728,6782837	0,16243948	728,6875	0,464641303	728,6882935	0,333589792	728,6882935	0,229950517	728,6882935	0,351839602	728,6875	0,299761027	728,6782837	0,247280747	728,6782837	0,132541373	728,6782837	0,195452675
728,7131958	0,138484865	728,7124023	0,235105366	728,703186	0,215678409	728,703186	0,178438902	728,7124023	0,311054081	728,7131958	0,233074516	728,7131958	0,18431209	728,7131958	0,255954236	728,7124023	0,210258663	728,703186	0,208989665	728,703186	0,15739575	728,703186	0,192912042
728,7380981	0,096098863	728,7373047	0,205090865	728,7280884	0,153179124	728,7280884	0,113842428	728,7373047	0,246041149	728,7380981	0,153084427	728,7380981	0,111482278	728,7380981	0,16545181	728,7373047	0,198679	728,7280884	0,139898911	728,7280884	0,110958278	728,7280884	0,125507012
728,7630615	0,111041278	728,762207	0,232867196	728,7529907	0,155725479	728,7529907	0,108849071	728,762207	0,247836858	728,7630615	0,157543167	728,7630615	0,125609487	728,7630615	0,159137741	728,762207	0,224147007	728,7529907	0,1302201	728,7529907	0,095024265	728,7529907	0,119998731
728,7879639	0,122561462	728,7871094	0,162765861	728,7778931	0,159210891	728,7778931	0,131954148	728,7871094	0,178996801	728,7879639	0,149721146	728,7879639	0,141595706	728,7879639	0,156787336	728,7871094	0,152544811	728,7778931	0,138104364	728,7778931	0,126697391	728,7778931	0,147144765
728,8128662	0,077417448	728,8120117	0,125394493	728,8027954	0,112308957	728,8027954	0,086321019	728,8120117	0,148452848	728,8128662	0,096370757	728,8128662	0,092462249	728,8128662	0,110765837	728,8120117	0,117540337	728,8027954	0,094905451	728,8027954	0,088345483	728,8027954	0,098782882
728,8377686	0,057002436	728,8369141	0,162927493	728,8276978	0,106213719	728,8276978	0,075320609	728,8369141	0,161748528	728,8377686	0,088677913	728,8377686	0,065876625	728,8377686	0,088609017	728,8369141	0,156718761	728,8276978	0,082935005	728,8276978	0,069567241	728,8276978	0,079689324
728,8626709	0,087770373	728,8618164	0,145661786	728,8526001	0,124994993	728,8526001	0,120600455	728,8618164	0,138357386	728,8626709	0,105328687	728,8626709	0,087531783	728,8626709	0,101982214	728,8618164	0,140965626	728,8526001	0,103768714	728,8526001	0,11295107	728,8526001	0,111789621
728,8875732	0,063072279	728,8867188	0,09574002	728,8775024	0,105599605	728,8775024	0,099775694	728,8867188	0,093702689	728,8875732	0,060844507	728,8875732	0,06457141	728,8875732	0,063385159	728,8867188	0,094756372	728,8775024	0,090091899	728,8775024	0,107804671	728,8775024	0,101947136
728,9124756	0,061296262	728,9116211	0,115061387	728,9024048	0,086190321	728,9024048	0,070409641	728,9116211	0,108483851	728,9124756	0,049162362	728,9124756	0,04570308	728,9124756	0,051445622	728,9116211	0,121167846	728,9024048	0,063222289	728,9024048	0,077515572	728,9024048	0,070195638
728,9373779	0,117535323	728,9365234	0,139794871	728,9273071	0,110811137	728,9273071	0,112951458	728,9365234	0,117412351	728,9373779	0,069933496	728,9373779	0,081606679	728,9373779	0,07723444	728,9365234	0,167712852	728,9273071	0,082826994	728,9273071	0,097526804	728,9273071	0,089593664
728,9622803	0,181687653	728,9614258	0,106979646	728,9522705	0,120599136	728,9522705	0,179297701	728,9614258	0,0745726	728,9622803	0,058761269	728,9622803	0,076833121	728,9622803	0,062883869	728,9614258	0,183914691	728,9522705	0,089793526	728,9522705	0,146570206	728,9522705	0,113857217
728,9871826	0,379167259	728,9863281	0,171988592	728,9771729	0,104109637	728,9771729	0,252785504	728,9863281	0,097469516	728,9871826	0,054487765	728,9871826	0,085339904	728,9871826	0,056402538	728,9863281	0,373692214	728,9771729	0,066818364	728,9771729	0,170335889	728,9771729	0,096489064
729,012085	0,911262214	729,0112305	0,31861499	729,0020752	0,182242855	729,0020752	0,469291538	729,0112305	0,151842743	729,012085	0,113846466	729,012085	0,247996628	729,012085	0,122613139	729,0112305	0,689409018	729,0020752	0,105085962	729,0020752	0,304256827	729,0020752	0,15859659
729,0369873	1,559006572	729,0361328	0,396638721	729,0269775	0,295955837	729,0269775	0,707678795	729,0361328	0,173746914	729,0369873	0,196372271	729,0369873	0,533396065	729,0369873	0,218527451	729,0361328	0,889991999	729,0269775	0,174100503	729,0269775	0,478313565	729,0269775	0,285978466
729,0618896	2,000268459	729,0610352	0,490855932	729,0518799	0,369606763	729,0518799	0,783435404	729,0610352	0,267300159	729,0618896	0,379534334	729,0618896	0,914130807	729,0618896	0,375068694	729,0610352	1,003628612	729,0518799	0,222692728	729,0518799	0,519375741	729,0518799	0,355630964
729,086792	2,127236366	729,0859375	0,558610737	729,0767822	0,461329222	729,0767822	0,781832576	729,0859375	0,370376021	729,086792	0,710577667	729,086792	1,403036356	729,086792	0,660187185	729,0859375	1,008638382	729,0767822	0,328804553	729,0767822	0,51312232	729,0767822	0,439370006
729,1116943	1,905150056	729,1108398	0,493815839	729,1016846	0,488466382	729,1016846	0,740592659	729,1108398	0,340845346	729,1116943	0,968557179	729,1116943	1,657481313	729,1116943	0,838805616	729,1108398	0,887207091	729,1016846	0,413030803	729,1016846	0,512173474	729,1016846	0,488936007
729,1365967	1,706158042	729,1357422	0,456442624	729,1265869	0,413580209	729,1265869	0,602555931	729,1357422	0,322958797	729,1365967	1,051361203	729,1365967	1,627112865	729,1365967	0,871285141	729,1357422	0,832770586	729,1265869	0,388857871	729,1265869	0,434550703	729,1265869	0,417464972
729,161499	1,603098035	729,1607056	0,500342846	729,1514893	0,374596983	729,1514893	0,491348594	729,1607056	0,355186522	729,161499	1,083627462	729,161499	1,535851121	729,161499	0,877559245	729,1607056	0,80772841	729,1514893	0,352837831	729,1514893	0,356950194	729,1514893	0,359378338
729,1864014	1,46517837	729,1856079	0,42408213	729,1763916	0,354071289	729,1763916	0,424261004	729,1856079	0,331121534	729,1864014	1,050311446	729,1864014	1,480681062	729,1864014	0,891977549	729,1856079	0,625651956	729,1763916	0,345266849	729,1763916	0,321381748	729,1763916	0,353076071
729,2113037	1,120335937	729,2105103	0,335455656	729,2012939	0,289600492	729,2012939	0,324610025	729,2105103	0,29349941	729,2113037	0,924286246	729,2113037	1,339091539	729,2113037	0,845364869	729,2105103	0,471038371	729,2012939	0,296735674	729,2012939	0,257600427	729,2012939	0,30047518
729,2362061	0,793998897	729,2354126	0,308859646	729,2261963	0,223045915	729,2261963	0,224916816	729,2354126	0,29637295	729,2362061	0,817811787	729,2362061	1,129466772	729,2362061	0,778871179	729,2354126	0,41880551	729,2261963	0,235464036	729,2261963	0,173844993	729,2261963	0,209651083
729,2611084	0,643228173	729,2603149	0,2718077	729,2510986	0,198776141	729,2510986	0,209681556	729,2603149	0,25926879	729,2611084	0,728029847	729,2611084	0,930154145	729,2611084	0,698418975	729,2603149	0,363440394	729,2510986	0,207292929	729,2510986	0,160342127	729,2510986	0,185813949
729,2860107	0,500222683	729,2852173	0,17868492	729,276001	0,165891126	729,276001	0,215333536	729,2852173	0,170467243	729,2860107	0,561505437	729,2860107	0,711077869	729,2860107	0,52500242	729,2852173	0,269476771	729,276001	0,174624726	729,276001	0,177711725	729,276001	0,180347502
729,3109131	0,404254496	729,3101196	0,194366708	729,3009033	0,118878245	729,3009033	0,177799031	729,3101196	0,162434131	729,3109131	0,408816785	729,3109131	0,508687139	729,3109131	0,379951	729,3101196	0,319294065	729,3009033	0,11698164	729,3009033	0,140044048	729,3009033	0,11823792
729,3358154	0,480729431	729,335022	0,269384742	729,3258057	0,149127573	729,3258057	0,259959728	729,335022	0,184903949	729,3358154	0,356179982	729,3358154	0,462816715	729,3358154	0,339136034	729,335022	0,470757961	729,3258057	0,12564981	729,3258057	0,197593629	729,3258057	0,144724682
729,3607178	0,585299253	729,3599243	0,318344533	729,350708	0,210121363	729,350708	0,415713012	729,3599243	0,167949408	729,3607178	0,290338457	729,3607178	0,446929246	729,3607178	0,299653858	729,3599243	0,590358794	729,350708	0,155486196	729,350708	0,323642671	729,350708	0,214594945
729,3856201	0,666599512	729,3848267	0,477547109	729,3756104	0,26102978	729,3756104	0,508980513	729,3848267	0,252519459	729,3856201	0,274859935	729,3856201	0,44770354	729,3856201	0,291276276	729,3848267	0,794328451	729,3756104	0,163502738	729,3756104	0,385660678	729,3756104	0,264282107
729,4105225	0,782854259	729,409729	0,714487195	729,4005127	0,39193067	729,4005127	0,614091098	729,409729	0,411284626	729,4105225	0,354819298	729,4105225	0,578699172	729,4105225	0,395618469	729,409729	1,044874907	729,4005127	0,253848821	729,4005127	0,45776403	729,4005127	0,389761806
729,4354248	0,8233729	729,4346313	0,883144736	729,425415	0,517306447	729,425415	0,706083655	729,4346313	0,531009555	729,4354248	0,42331025	729,4354248	0,685293674	729,4354248	0,508333802	729,4346313	1,21491909	729,425415	0,38145414	729,425415	0,561609447	729,425415	0,525925696
729,4603271	0,804318428	729,4595337	1,10224843	729,4503174	0,561703384	729,4503174	0,732336938	729,4595337	0,705374181	729,4603271	0,458421946	729,4603271	0,703938544	729,4603271	0,560501218	729,4595337	1,400403261	729,4503174	0,438951433	729,4503174	0,592860281	729,4503174	0,557275236
729,4852295	0,819745958	729,484436	1,333925366	729,4752197	0,657998204	729,4752197	0,73900187	729,484436	0,952445686	729,4852295	0,523716748	729,4852295	0,742635429	729,4852295	0,661297679	729,484436	1,491082788	729,4752197	0,524094284	729,4752197	0,578870296	729,4752197	0,613494158
729,5101929	0,82569474	729,5093384	1,320390582	729,5001221	0,728341341	729,5001221	0,689247549	729,5093384	1,086103439	729,5101929	0,618257403	729,5101929	0,836304367	729,5101929	0,816927135	729,5093384	1,288699031	729,5001221	0,643026769	729,5001221	0,554601908	729,5001221	0,688437939
729,5350952	0,676247001	729,5342407	1,178266048	729,5250244	0,646218956	729,5250244	0,501863241	729,5342407	1,111163497	729,5350952	0,648254156	729,5350952	0,833180368	729,5350952	0,871044874	729,5342407	1,047054887	729,5250244	0,66216141	729,5250244	0,413246512	729,5250244	0,610596657
729,5599976	0,47852686	729,5591431	1,058123469	729,5499878	0,540842414	729,5499878	0,369328886	729,5591431	1,117130399	729,5599976	0,675629556	729,5599976	0,764424622	729,5599976	0,884553313	729,5591431	0,87776655	729,5499878	0,61492753	729,5499878	0,291724026	729,5499878	0,497134298
729,5848999	0,387350351	729,5840454	0,837311089	729,5748901	0,477002352	729,5748901	0,32251966	729,5840454	0,998628438	729,5848999	0,673882425	729,5848999	0,684394121	729,5848999	0,850109339	729,5840454	0,649793148	729,5748901	0,578625798	729,5748901	0,252037853	729,5748901	0,435197085
729,6098022	0,258073956	729,6089478	0,553347707	729,5997925	0,36070627	729,5997925	0,251861751	729,6089478	0,749826491	729,6098022	0,548868895	729,6098022	0,51654613	729,6098022	0,679518163	729,6089478	0,392287374	729,5997925	0,469037056	729,5997925	0,205321416	729,5997925	0,350874603
729,6347046	0,156301171	729,6338501	0,391893268	729,6246948	0,233750433	729,6246948	0,135862008	729,6338501	0,575722694	729,6347046	0,398381323	729,6347046	0,326402873	729,6347046	0,494367748	729,6338501	0,283762187	729,6246948	0,315858901	729,6246948	0,108308375	729,6246948	0,21227859
729,6596069	0,165017724	729,6587524	0,305613965	729,6495972	0,182912394	729,6495972	0,123202488	729,6587524	0,441936314	729,6596069	0,335733533	729,6596069	0,277514666	729,6596069	0,390029341	729,6587524	0,237220719	729,6495972	0,239152253	729,6495972	0,092243217	729,6495972	0,158455268
729,6845093	0,13444306	729,6836548	0,172577754	729,6744995	0,149050415	729,6744995	0,131033286	729,6836548	0,276696861	729,6845093	0,231891319	729,6845093	0,218734041	729,6845093	0,271134645	729,6836548	0,136811495	729,6744995	0,189028472	729,6744995	0,114034109	729,6744995	0,149443492
729,7094116	0,085898399	729,7085571	0,131244719	729,6994019	0,087784179	729,6994019	0,071235396	729,7085571	0,198207006	729,7094116	0,149658278	729,7094116	0,122821942	729,7094116	0,169471473	729,7085571	0,118399903	729,6994019	0,113116704	729,6994019	0,063512318	729,6994019	0,084788002
729,734314	0,106914379	729,7334595	0,151835874	729,7243042	0,087183751	729,7243042	0,068208531	729,7334595	0,179643869	729,734314	0,14595671	729,734314	0,129349396	729,734314	0,156700015	729,7334595	0,145557672	729,7243042	0,097360708	729,7243042	0,05442619	729,7243042	0,074225768
729,7592163	0,100140609	729,7583618	0,095432274	729,7492065	0,09163177	729,7492065	0,086956531	729,7583618	0,109272167	729,7592163	0,111222334	729,7592163	0,124007583	729,7592163	0,120496511	729,7583618	0,081686318	729,7492065	0,102763265	729,7492065	0,084252924	729,7492065	0,096203715
729,7841187	0,067758232	729,7832642	0,069194242	729,7741089	0,052247625	729,7741089	0,044713516	729,7832642	0,085409924	729,7841187	0,075888708	729,7841187	0,083374448	729,7841187	0,085706115	729,7832642	0,065734491	729,7741089	0,061380163	729,7741089	0,046750862	729,7741089	0,057488706
729,809021	0,055140406	729,8081665	0,109684959	729,7990112	0,04448434	729,7990112	0,03641931	729,8081665	0,108473003	729,809021	0,07304281	729,809021	0,065246306	729,809021	0,077675365	729,8081665	0,101329565	729,7990112	0,049154386	729,7990112	0,033588782	729,7990112	0,042340279
729,8339233	0,079421982	729,8331299	0,079592168	729,8239136	0,064498521	729,8239136	0,066952363	729,8331299	0,076075017	729,8339233	0,089457393	729,8339233	0,088483907	729,8339233	0,096526593	729,8331299	0,069759943	729,8239136	0,066519663	729,8239136	0,071123682	729,8239136	0,066792794
729,8588257	0,059021104	729,8580322	0,058537982	729,8488159	0,041655034	729,8488159	0,042823792	729,8580322	0,056977674	729,8588257	0,050889738	729,8588257	0,065122627	729,8588257	0,063595615	729,8580322	0,048891872	729,8488159	0,045324937	729,8488159	0,053381328	729,8488159	0,048730828
729,883728	0,038440045	729,8829346	0,074712262	729,8737183	0,038803108	729,8737183	0,034119081	729,8829346	0,075879633	729,883728	0,042080771	729,883728	0,043437645	729,883728	0,048020069	729,8829346	0,070166506	729,8737183	0,03702182	729,8737183	0,037742011	729,8737183	0,031900596
729,9086304	0,076190054	729,9078369	0,097947337	729,8986206	0,055275481	729,8986206	0,056755647	729,9078369	0,088358805	729,9086304	0,063417993	729,9086304	0,070941657	729,9086304	0,072519004	729,9078369	0,094108485	729,8986206	0,053495929	729,8986206	0,056745376	729,8986206	0,049994867
729,9335327	0,077070437	729,9327393	0,060439561	729,9235229	0,058951352	729,9235229	0,086268134	729,9327393	0,053391475	729,9335327	0,048030891	729,9335327	0,064886823	729,9335327	0,058017008	729,9327393	0,060837135	729,9235229	0,062103201	729,9235229	0,087444358	729,9235229	0,068953738
729,9584351	0,100864634	729,9576416	0,077112161	729,9484253	0,039600585	729,9484253	0,08337336	729,9576416	0,063873269	729,9584351	0,037078213	729,9584351	0,050474409	729,9584351	0,045554291	729,9576416	0,111333154	729,9484253	0,039070904	729,9484253	0,065854639	729,9484253	0,03973686
729,9833374	0,315342933	729,9825439	0,146509692	729,9733276	0,070899867	729,9733276	0,222096473	729,9825439	0,086817764	729,9833374	0,066735595	729,9833374	0,101234525	729,9833374	0,074317634	729,9825439	0,247547776	729,9733276	0,054528572	729,9733276	0,133432239	729,9733276	0,067166306
730,0082397	0,690217733	730,0074463	0,163356453	729,99823	0,128729165	729,99823	0,460720003	730,0074463	0,07049416	730,0082397	0,075172774	730,0082397	0,184168741	730,0082397	0,091993377	730,0074463	0,339232147	729,99823	0,085489452	729,99823	0,277956456	729,99823	0,144361496
730,0331421	1,063798666	730,0323486	0,237099171	730,0231323	0,177708283	730,0231323	0,57546258	730,0323486	0,116990715	730,0331421	0,120237917	730,0331421	0,332627416	730,0331421	0,149530739	730,0323486	0,46061781	730,0231323	0,091439016	730,0231323	0,322501808	730,0231323	0,183060884
730,0580444	1,294791937	730,057251	0,320764065	730,0480347	0,277720928	730,0480347	0,591666758	730,057251	0,199586764	730,0580444	0,312982619	730,0580444	0,637542009	730,0580444	0,321785957	730,057251	0,533949435	730,0480347	0,170165688	730,0480347	0,335838199	730,0480347	0,277886212
730,0829468	1,203288198	730,0821533	0,268208474	730,072937	0,322063893	730,072937	0,540913284	730,0821533	0,18908608	730,0829468	0,493639678	730,0829468	0,872810543	730,0829468	0,462504745	730,0821533	0,426637024	730,072937	0,257282585	730,072937	0,342107445	730,072937	0,347189873
730,1078491	0,979604423	730,1070557	0,20885703	730,0978394	0,264991105	730,0978394	0,395100594	730,1070557	0,179583624	730,1078491	0,577959359	730,1078491	0,907879233	730,1078491	0,504747689	730,1070557	0,342955351	730,0978394	0,246351212	730,0978394	0,253893018	730,0978394	0,279750049
730,1327515	0,815575361	730,131958	0,230200678	730,1227417	0,227302969	730,1227417	0,320640475	730,131958	0,194665357	730,1327515	0,637859643	730,1327515	0,874396563	730,1327515	0,525173724	730,131958	0,361464113	730,1227417	0,231092244	730,1227417	0,198202476	730,1227417	0,232587621
730,1576538	0,732915878	730,1568604	0,183737725	730,1477051	0,227046758	730,1477051	0,317458153	730,1568604	0,144025639	730,1576538	0,657807827	730,1576538	0,812054098	730,1576538	0,514881015	730,1568604	0,289207458	730,1477051	0,233035788	730,1477051	0,21632956	730,1477051	0,236479744
730,1825562	0,610694349	730,1817627	0,135583594	730,1726074	0,1731686	730,1726074	0,226783291	730,1817627	0,109211087	730,1825562	0,534302175	730,1825562	0,668241978	730,1825562	0,419030339	730,1817627	0,216750771	730,1726074	0,181601003	730,1726074	0,162120491	730,1726074	0,182177216
730,2074585	0,476517916	730,206665	0,153547585	730,1975098	0,135727197	730,1975098	0,160755739	730,206665	0,128954366	730,2074585	0,429114908	730,2074585	0,547810793	730,2074585	0,3581056	730,206665	0,221236229	730,1975098	0,142112881	730,1975098	0,107326411	730,1975098	0,134522393
730,2324219	0,411796927	730,2315674	0,153912961	730,2224121	0,142983541	730,2224121	0,169790566	730,2315674	0,130376026	730,2324219	0,406758934	730,2324219	0,529813409	730,2324219	0,353685349	730,2315674	0,208458707	730,2224121	0,152053952	730,2224121	0,114149988	730,2224121	0,141881779
730,2573242	0,317059875	730,2564697	0,091543756	730,2473145	0,120222531	730,2473145	0,165437356	730,2564697	0,080562018	730,2573242	0,324973583	730,2573242	0,423647344	730,2573242	0,289725602	730,2564697	0,130779639	730,2473145	0,140053481	730,2473145	0,128738925	730,2473145	0,139630273
730,2822266	0,237800598	730,2813721	0,101031035	730,2722168	0,08231312	730,2722168	0,116570838	730,2813721	0,092085958	730,2822266	0,244791999	730,2822266	0,291032642	730,2822266	0,214085355	730,2813721	0,149083406	730,2722168	0,086848155	730,2722168	0,088388637	730,2722168	0,084297776
730,3071289	0,272566855	730,3062744	0,145011738	730,2971191	0,097131148	730,2971191	0,153800741	730,3062744	0,108988121	730,3071289	0,229230016	730,3071289	0,284311563	730,3071289	0,209153593	730,3062744	0,221801341	730,2971191	0,094009034	730,2971191	0,112192124	730,2971191	0,093120381
730,3320313	0,307240337	730,3311768	0,133387744	730,3220215	0,124718614	730,3220215	0,221680388	730,3311768	0,07818532	730,3320313	0,182464138	730,3320313	0,255959302	730,3320313	0,184634835	730,3311768	0,242283478	730,3220215	0,111573592	730,3220215	0,179809898	730,3220215	0,135935605
730,3569336	0,330093533	730,3560791	0,221506417	730,3469238	0,113723569	730,3469238	0,245124876	730,3560791	0,116090588	730,3569336	0,151749626	730,3569336	0,218438506	730,3569336	0,153278559	730,3560791	0,384836435	730,3469238	0,092291132	730,3469238	0,192317858	730,3469238	0,122886956
730,3818359	0,438352942	730,3809814	0,404578567	730,3718262	0,190764055	730,3718262	0,350768954	730,3809814	0,207180664	730,3818359	0,194625467	730,3818359	0,304292619	730,3818359	0,209237412	730,3809814	0,623938322	730,3718262	0,132373512	730,3718262	0,276192486	730,3718262	0,184975252
730,4067383	0,521824419	730,4058838	0,54890132	730,3967285	0,297987074	730,3967285	0,500588536	730,4058838	0,280316263	730,4067383	0,227483973	730,4067383	0,382094204	730,4067383	0,264309347	730,4058838	0,786164284	730,3967285	0,213185936	730,3967285	0,422628164	730,3967285	0,309330553
730,4316406	0,518176615	730,4307861	0,753630042	730,4216309	0,362192482	730,4216309	0,536388695	730,4307861	0,432487965	730,4316406	0,226141304	730,4316406	0,403363645	730,4316406	0,30075869	730,4307861	1,006730199	730,4216309	0,255634546	730,4216309	0,47699064	730,4216309	0,366006672
730,456543	0,566658795	730,4556885	1,042071462	730,4465332	0,462790787	730,4465332	0,611331165	730,4556885	0,656216264	730,456543	0,293792933	730,456543	0,459460258	730,456543	0,38571471	730,4556885	1,298450828	730,4465332	0,346220464	730,4465332	0,539156258	730,4465332	0,450475335
730,4814453	0,695550144	730,4805908	1,211289644	730,4714355	0,586567879	730,4714355	0,751568139	730,4805908	0,83314985	730,4814453	0,390373349	730,4814453	0,592194378	730,4814453	0,534481466	730,4805908	1,425081491	730,4714355	0,473689795	730,4714355	0,647370219	730,4714355	0,577745914
730,5063477	0,740292311	730,5054932	1,267439723	730,4963379	0,655709326	730,4963379	0,743533909	730,5054932	0,946365833	730,5063477	0,428589284	730,5063477	0,666744411	730,5063477	0,635300577	730,5054932	1,39400804	730,4963379	0,54952389	730,4963379	0,632305741	730,4963379	0,630334079
730,53125	0,695469379	730,5304565	1,304305792	730,5212402	0,682742357	730,5212402	0,652449667	730,5304565	1,096459389	730,53125	0,499567658	730,53125	0,744739711	730,53125	0,752089798	730,5304565	1,316106319	730,5212402	0,596926749	730,5212402	0,542471528	730,5212402	0,630255938
730,5561523	0,630626321	730,5553589	1,173795342	730,5461426	0,703492343	730,5461426	0,563525259	730,5553589	1,162462831	730,5561523	0,615905464	730,5561523	0,855055392	730,5561523	0,904200137	730,5553589	1,048429251	730,5461426	0,666415274	730,5461426	0,460426956	730,5461426	0,643844128
730,5810547	0,44577086	730,5802612	0,85904026	730,5710449	0,588576257	730,5710449	0,40207392	730,5802612	1,018623471	730,5810547	0,626450419	730,5810547	0,805983365	730,5810547	0,903265357	730,5802612	0,670873642	730,5710449	0,66043514	730,5710449	0,326066852	730,5710449	0,563379705
730,605957	0,268741637	730,6051636	0,609685719	730,5959473	0,390400171	730,5959473	0,219028458	730,6051636	0,84111166	730,605957	0,566155076	730,605957	0,612398624	730,605957	0,782283425	730,6051636	0,450787544	730,5959473	0,511358798	730,5959473	0,174514472	730,5959473	0,358199686
730,6308594	0,229568258	730,6300659	0,452082783	730,6208496	0,273524463	730,6208496	0,165220216	730,6300659	0,647627592	730,6308594	0,494018704	730,6308594	0,483715266	730,6308594	0,642696679	730,6300659	0,334577352	730,6208496	0,379471183	730,6208496	0,121796481	730,6208496	0,244376063
730,6557617	0,17594184	730,6549683	0,259374976	730,645752	0,195432946	730,645752	0,148404866	730,6549683	0,421752602	730,6557617	0,357452512	730,6557617	0,344129652	730,6557617	0,460434586	730,6549683	0,187247381	730,645752	0,272145033	730,645752	0,128511667	730,645752	0,191980585
730,6806641	0,107713297	730,6798706	0,185246587	730,6706543	0,10661646	730,6706543	0,084107816	730,6798706	0,29936868	730,6806641	0,235899881	730,6806641	0,209170863	730,6806641	0,287740469	730,6798706	0,146755934	730,6706543	0,156474501	730,6706543	0,072734416	730,6706543	0,105801277
730,7055664	0,135727942	730,7047729	0,182688117	730,6955566	0,092714265	730,6955566	0,082823426	730,7047729	0,248340905	730,7055664	0,204627633	730,7055664	0,192603931	730,7055664	0,232266679	730,7047729	0,158742368	730,6955566	0,116224475	730,6955566	0,059526544	730,6955566	0,084290966
730,7304688	0,127630651	730,7296753	0,112693451	730,720459	0,094181128	730,720459	0,102167785	730,7296753	0,149656579	730,7304688	0,149932906	730,7304688	0,168027326	730,7304688	0,178727314	730,7296753	0,096385919	730,720459	0,114795789	730,720459	0,090512894	730,720459	0,104588747
730,7553711	0,082058929	730,7545776	0,08560399	730,7454224	0,053236961	730,7454224	0,051030401	730,7545776	0,112817995	730,7553711	0,102586426	730,7553711	0,116383709	730,7553711	0,120429993	730,7545776	0,072725914	730,7454224	0,068677738	730,7454224	0,053650085	730,7454224	0,060558517
730,7802734	0,075580008	730,77948	0,117605686	730,7703247	0,04776689	730,7703247	0,043029074	730,77948	0,128453895	730,7802734	0,094350137	730,7802734	0,09875799	730,7802734	0,11042197	730,77948	0,110413603	730,7703247	0,054782942	730,7703247	0,038539253	730,7703247	0,045420259
730,8051758	0,09764339	730,8043823	0,085432149	730,7952271	0,064064711	730,7952271	0,076774709	730,8043823	0,090875044	730,8051758	0,107459605	730,8051758	0,125394374	730,8051758	0,115786076	730,8043823	0,079903737	730,7952271	0,072341561	730,7952271	0,071195737	730,7952271	0,07165195
730,8300781	0,075858288	730,8292847	0,065000288	730,8201294	0,043530226	730,8201294	0,054646369	730,8292847	0,072973378	730,8300781	0,072639316	730,8300781	0,092011645	730,8300781	0,082755104	730,8292847	0,061155487	730,8201294	0,04867911	730,8201294	0,059368689	730,8201294	0,047824796
730,8549805	0,058465403	730,854187	0,087634601	730,8450317	0,039089523	730,8450317	0,039300047	730,854187	0,088692948	730,8549805	0,053483874	730,8549805	0,059574865	730,8549805	0,060857613	730,854187	0,082701787	730,8450317	0,039276067	730,8450317	0,041707091	730,8450317	0,033884399
730,8798828	0,093060017	730,8790894	0,115810819	730,8699341	0,052904081	730,8699341	0,060571235	730,8790894	0,101044044	730,8798828	0,07968279	730,8798828	0,096265353	730,8798828	0,093203649	730,8790894	0,108134851	730,8699341	0,053219493	730,8699341	0,058937345	730,8699341	0,052009106
730,9047852	0,093904302	730,9039917	0,074919119	730,8948364	0,056512862	730,8948364	0,082932003	730,9039917	0,066536039	730,9047852	0,063658327	730,9047852	0,087301083	730,9047852	0,075657055	730,9039917	0,066751778	730,8948364	0,062558763	730,8948364	0,087010428	730,8948364	0,073838681
730,9296875	0,084645055	730,928894	0,090403765	730,9197388	0,038220845	730,9197388	0,056682415	730,928894	0,085487336	730,9296875	0,049288359	730,9296875	0,065456323	730,9296875	0,063601285	730,928894	0,092673786	730,9197388	0,039389726	730,9197388	0,057511371	730,9197388	0,042144101
730,9545898	0,147229269	730,9537964	0,131124392	730,9446411	0,059492804	730,9446411	0,096786879	730,9537964	0,108810037	730,9545898	0,082740746	730,9545898	0,113631271	730,9545898	0,101862326	730,9537964	0,151639625	730,9446411	0,057507437	730,9446411	0,079280749	730,9446411	0,059804127
730,9795532	0,250320375	730,9786987	0,100078166	730,9695435	0,081541665	730,9695435	0,184648588	730,9786987	0,070240065	730,9795532	0,082768045	730,9795532	0,135481313	730,9795532	0,095795676	730,9786987	0,15881592	730,9695435	0,077739693	730,9695435	0,147885591	730,9695435	0,10008733
731,0044556	0,427728683	731,0036011	0,139872625	730,9944458	0,07748992	730,9944458	0,257797092	731,0036011	0,087834202	731,0044556	0,076712698	731,0044556	0,14336662	731,0044556	0,093978301	731,0036011	0,264107347	730,9944458	0,059146084	730,9944458	0,172479406	730,9944458	0,087186277
731,0293579	0,735536098	731,0285034	0,242362291	731,0193481	0,149399281	731,0193481	0,388798296	731,0285034	0,14662981	731,0293579	0,1445833	731,0293579	0,296932429	731,0293579	0,164086044	731,0285034	0,40119952	731,0193481	0,093912438	731,0193481	0,237110764	731,0193481	0,143416986
731,0542603	0,884691715	731,0534058	0,233917579	731,0442505	0,225495502	731,0442505	0,453983605	731,0534058	0,143572405	731,0542603	0,223577499	731,0542603	0,508737206	731,0542603	0,257159024	731,0534058	0,368083596	731,0442505	0,165573195	731,0442505	0,310821056	731,0442505	0,241120115
731,0791626	0,796657145	731,0783081	0,215763897	731,0691528	0,219666272	731,0691528	0,364368886	731,0783081	0,166083261	731,0791626	0,290618926	731,0791626	0,609745681	731,0791626	0,311852604	731,0783081	0,317451179	731,0691528	0,185219988	731,0691528	0,248306096	731,0691528	0,230689079
731,1040649	0,70664525	731,1032104	0,236791089	731,0940552	0,21096684	731,0940552	0,302838057	731,1032104	0,204791725	731,1040649	0,398997098	731,1040649	0,678255081	731,1040649	0,384546459	731,1032104	0,321484953	731,0940552	0,206330836	731,0940552	0,198922127	731,0940552	0,214111671
731,1289673	0,604129314	731,1281128	0,187593058	731,1189575	0,214433044	731,1189575	0,322116256	731,1281128	0,161008239	731,1289673	0,488590628	731,1289673	0,704521954	731,1289673	0,45901373	731,1281128	0,270754993	731,1189575	0,228298441	731,1189575	0,224659026	731,1189575	0,231057584
731,1538696	0,504986227	731,1530151	0,144102395	731,1438599	0,175655231	731,1438599	0,25694263	731,1530151	0,123506352	731,1538696	0,439849526	731,1538696	0,586819053	731,1538696	0,396186531	731,1530151	0,234616905	731,1438599	0,18510738	731,1438599	0,183685243	731,1438599	0,189458117
731,178772	0,472019613	731,1779175	0,17858918	731,1687622	0,152928695	731,1687622	0,193759292	731,1779175	0,146021873	731,178772	0,379892737	731,178772	0,468563467	731,178772	0,319428831	731,1779175	0,26425752	731,1687622	0,155479342	731,1687622	0,132551998	731,1687622	0,145017758
731,2036743	0,480794728	731,2028198	0,199327886	731,1936646	0,169277102	731,1936646	0,206584051	731,2028198	0,157152206	731,2036743	0,357228607	731,2036743	0,479901254	731,2036743	0,325573951	731,2028198	0,271207064	731,1936646	0,174659967	731,1936646	0,143922895	731,1936646	0,161180884
731,2285767	0,378819108	731,2277832	0,141092673	731,2185669	0,150210932	731,2185669	0,190651521	731,2277832	0,115353636	731,2285767	0,295922816	731,2285767	0,436576784	731,2285767	0,288266838	731,2277832	0,188251972	731,2185669	0,165651008	731,2185669	0,148834705	731,2185669	0,159942761
731,253479	0,281281412	731,2526855	0,144776449	731,2434692	0,09817747	731,2434692	0,119967639	731,2526855	0,127932429	731,253479	0,244868815	731,253479	0,35267362	731,253479	0,250194222	731,2526855	0,19096756	731,2434692	0,111730888	731,2434692	0,089792721	731,2434692	0,1026095
731,2783813	0,28686744	731,2775879	0,177656442	731,2683716	0,104624934	731,2683716	0,13930659	731,2775879	0,146305948	731,2783813	0,254828811	731,2783813	0,341413468	731,2783813	0,253991008	731,2775879	0,228886232	731,2683716	0,113205828	731,2683716	0,101862736	731,2683716	0,104242101
731,3032837	0,26448825	731,3024902	0,146642327	731,2932739	0,115581475	731,2932739	0,186989874	731,3024902	0,104361296	731,3032837	0,215925291	731,3032837	0,302107424	731,3032837	0,214977637	731,3024902	0,218223393	731,2932739	0,119339205	731,2932739	0,15415962	731,2932739	0,131353617
731,328186	0,264331192	731,3273926	0,206972048	731,3181763	0,095625907	731,3181763	0,20145382	731,3273926	0,123060063	731,328186	0,167030811	731,328186	0,218672991	731,328186	0,172993764	731,3273926	0,360395014	731,3181763	0,086742304	731,3181763	0,167163014	731,3181763	0,098155133
731,3530884	0,428037912	731,3522949	0,395103127	731,3431396	0,164462313	731,3431396	0,38266176	731,3522949	0,20343408	731,3530884	0,194247097	731,3530884	0,273159742	731,3530884	0,20389685	731,3522949	0,658878028	731,3431396	0,110615022	731,3431396	0,284099549	731,3431396	0,148247644
731,3779907	0,609743059	731,3771973	0,580409646	731,368042	0,304619759	731,368042	0,629007578	731,3771973	0,270738542	731,3779907	0,202539667	731,3779907	0,364145428	731,3779907	0,255868822	731,3771973	0,891968906	731,368042	0,184223071	731,368042	0,468401372	731,368042	0,303246766
731,4028931	0,670149922	731,4020996	0,81747967	731,3929443	0,428278118	731,3929443	0,675018728	731,4020996	0,435517371	731,4028931	0,22532101	731,4028931	0,416399509	731,4028931	0,308195353	731,4020996	1,120780945	731,3929443	0,255806923	731,3929443	0,533187151	731,3929443	0,415337414
731,4277954	0,722900331	731,427002	1,129809499	731,4178467	0,55362457	731,4178467	0,705790758	731,427002	0,693057835	731,4277954	0,317608625	731,4277954	0,540550947	731,4277954	0,434458911	731,427002	1,412418365	731,4178467	0,389110357	731,4178467	0,594257832	731,4178467	0,520324707
731,4526978	0,828072727	731,4519043	1,376894832	731,442749	0,66010201	731,442749	0,830749869	731,4519043	0,886442721	731,4526978	0,491177678	731,4526978	0,732647419	731,4526978	0,655959249	731,4519043	1,6639992	731,442749	0,534089565	731,442749	0,741290689	731,442749	0,639995575
731,4776001	0,912850618	731,4768066	1,553065062	731,4676514	0,726149142	731,4676514	0,934446454	731,4768066	1,03204155	731,4776001	0,571539164	731,4776001	0,816049397	731,4776001	0,782884419	731,4768066	1,837722182	731,4676514	0,6037094	731,4676514	0,845661104	731,4676514	0,7023862
731,5025024	1,100535274	731,501709	1,784210086	731,4925537	0,812665462	731,4925537	0,979138076	731,501709	1,240303993	731,5025024	0,634437025	731,5025024	0,905307055	731,5025024	0,898112059	731,501709	2,033627748	731,4925537	0,662779391	731,4925537	0,864376843	731,4925537	0,75184387
731,5274048	1,422912836	731,5266113	1,921681523	731,5174561	0,942693889	731,5174561	1,009788632	731,5266113	1,475141406	731,5274048	0,762194633	731,5274048	1,118712068	731,5274048	1,095429182	731,5266113	2,080657244	731,5174561	0,787173092	731,5174561	0,873638034	731,5174561	0,861322522
731,5523071	1,612169981	731,5515137	1,762640476	731,5423584	0,974418402	731,5423584	0,892601371	731,5515137	1,539963961	731,5523071	0,834537208	731,5523071	1,337453604	731,5523071	1,249374032	731,5515137	1,806357503	731,5423584	0,903873444	731,5423584	0,768625557	731,5423584	0,895270586
731,5772095	1,490788579	731,576416	1,497949958	731,5672607	0,81437695	731,5672607	0,608071983	731,576416	1,518654108	731,5772095	0,9454813	731,5772095	1,505252361	731,5772095	1,377637267	731,576416	1,367398024	731,5672607	0,86303556	731,5672607	0,529847085	731,5672607	0,738613904
731,6021118	1,059558511	731,6013184	1,132683992	731,5921631	0,618735671	731,5921631	0,386164874	731,6013184	1,359454513	731,6021118	1,081958175	731,6021118	1,652575374	731,6021118	1,492456317	731,6013184	0,888603687	731,5921631	0,742676675	731,5921631	0,332773179	731,5921631	0,563571334
731,6270142	0,598229587	731,6262207	0,686234236	731,6170654	0,40630132	731,6170654	0,261430889	731,6262207	0,995349467	731,6270142	1,056322455	731,6270142	1,357697368	731,6270142	1,376071692	731,6262207	0,490110755	731,6170654	0,558112979	731,6170654	0,237313867	731,6170654	0,392651469
731,6519165	0,344011188	731,651123	0,427312106	731,6419678	0,221049413	731,6419678	0,139765516	731,651123	0,679254055	731,6519165	0,798590481	731,6519165	0,79420799	731,6519165	0,968077958	731,651123	0,31685397	731,6419678	0,336413682	731,6419678	0,128127053	731,6419678	0,211512819
731,6768188	0,267118305	731,6760254	0,331647187	731,6668701	0,157057956	731,6668701	0,117629215	731,6760254	0,47933957	731,6768188	0,545826077	731,6768188	0,495473295	731,6768188	0,631144345	731,6760254	0,272984862	731,6668701	0,223181903	731,6668701	0,093780234	731,6668701	0,142388269
731,7017822	0,224621743	731,7009277	0,204571739	731,6917725	0,138044134	731,6917725	0,132584661	731,7009277	0,296646088	731,7017822	0,338505656	731,7017822	0,340101838	731,7017822	0,394805968	731,7009277	0,167223945	731,6917725	0,176766783	731,6917725	0,115754567	731,6917725	0,14081496
731,7266846	0,157196313	731,7258301	0,14413777	731,7166748	0,078437455	731,7166748	0,07524991	731,7258301	0,205315217	731,7266846	0,218487293	731,7266846	0,22855188	731,7266846	0,263252318	731,7258301	0,124939747	731,7166748	0,108531602	731,7166748	0,067630239	731,7166748	0,079388171
731,7515869	0,128706887	731,7507324	0,165022984	731,7415771	0,066069819	731,7415771	0,058812112	731,7507324	0,191789985	731,7515869	0,181275621	731,7515869	0,184457779	731,7515869	0,212151676	731,7507324	0,157432809	731,7415771	0,08244504	731,7415771	0,050613079	731,7415771	0,058824189
731,7764893	0,154350773	731,7756348	0,118165113	731,7664795	0,08096426	731,7664795	0,08950302	731,7756348	0,130763814	731,7764893	0,177494437	731,7764893	0,198923945	731,7764893	0,195657909	731,7756348	0,109325647	731,7664795	0,096810319	731,7664795	0,082979769	731,7664795	0,085993566
731,8013916	0,111353427	731,8005371	0,087009832	731,7913818	0,051505756	731,7913818	0,058049571	731,8005371	0,094962575	731,8013916	0,11253532	731,8013916	0,142271057	731,8013916	0,134289086	731,8005371	0,078225158	731,7913818	0,063782245	731,7913818	0,057477038	731,7913818	0,055937082
731,8262939	0,082459807	731,8254395	0,105704345	731,8162842	0,045804072	731,8162842	0,04140541	731,8254395	0,11390423	731,8262939	0,089466587	731,8262939	0,094402671	731,8262939	0,102246583	731,8254395	0,105531238	731,8162842	0,04715303	731,8162842	0,036794458	731,8162842	0,037226051
731,8511963	0,117631972	731,8503418	0,12883161	731,8411865	0,056681827	731,8411865	0,06089041	731,8503418	0,119591311	731,8511963	0,104586519	731,8511963	0,135254562	731,8511963	0,121824577	731,8503418	0,127535224	731,8411865	0,061445657	731,8411865	0,052849043	731,8411865	0,05454538
731,8760986	0,103812866	731,8752441	0,079453245	731,8660889	0,058248598	731,8660889	0,080058992	731,8752441	0,074948937	731,8760986	0,077625915	731,8760986	0,118462421	731,8760986	0,096264452	731,8752441	0,078273714	731,8660889	0,066389658	731,8660889	0,07855618	731,8660889	0,070491895
731,901001	0,078915425	731,9001465	0,095115468	731,8909912	0,033324726	731,8909912	0,047164511	731,9001465	0,087249629	731,901001	0,062236618	731,901001	0,07857991	731,901001	0,072704233	731,9001465	0,097677067	731,8909912	0,038765017	731,8909912	0,049873624	731,8909912	0,037437219
731,9259033	0,123578772	731,9251099	0,132023737	731,9158936	0,05632985	731,9158936	0,07545653	731,9251099	0,11598172	731,9259033	0,091764517	731,9259033	0,113412142	731,9259033	0,098596208	731,9251099	0,137897536	731,9158936	0,053735606	731,9158936	0,063312821	731,9158936	0,050484855
731,9508057	0,142911538	731,9500122	0,084886611	731,9408569	0,070927419	731,9408569	0,123216651	731,9500122	0,077742897	731,9508057	0,07947471	731,9508057	0,121196836	731,9508057	0,094711721	731,9500122	0,097264282	731,9408569	0,071563616	731,9408569	0,109934144	731,9408569	0,081304505
731,975708	0,138300061	731,9749146	0,093025036	731,9657593	0,047535956	731,9657593	0,114925414	731,9749146	0,085669987	731,975708	0,064908914	731,975708	0,094047144	731,975708	0,078570381	731,9749146	0,123759925	731,9657593	0,047193632	731,9657593	0,090927765	731,9657593	0,058346581
732,0006104	0,265372485	731,9998169	0,159071892	731,9906616	0,075307466	731,9906616	0,1803855	731,9998169	0,124488793	732,0006104	0,106910273	732,0006104	0,150211513	732,0006104	0,114519723	731,9998169	0,212371141	731,9906616	0,063327573	731,9906616	0,118501328	731,9906616	0,079711452
732,0255127	0,399410993	732,0247192	0,134543121	732,015564	0,127367094	732,015564	0,281987816	732,0247192	0,09219595	732,0255127	0,117680773	732,0255127	0,205357909	732,0255127	0,133871019	732,0247192	0,200928271	732,015564	0,102431633	732,015564	0,188368469	732,015564	0,13881734
732,050415	0,412680984	732,0496216	0,140664712	732,0404663	0,126505449	732,0404663	0,244915813	732,0496216	0,102447599	732,050415	0,109737523	732,050415	0,221896365	732,050415	0,132153377	732,0496216	0,203242138	732,0404663	0,097529888	732,0404663	0,172002554	732,0404663	0,129225969
732,0753174	0,424868792	732,0745239	0,19163923	732,0653687	0,143242761	732,0653687	0,220029965	732,0745239	0,153208211	732,0753174	0,159573182	732,0753174	0,284211129	732,0753174	0,170345813	732,0745239	0,251005858	732,0653687	0,120442972	732,0653687	0,148471624	732,0653687	0,135546476
732,1002197	0,422527105	732,0994263	0,158094928	732,090271	0,166671112	732,090271	0,254215598	732,0994263	0,128114223	732,1002197	0,243709967	732,1002197	0,391039371	732,1002197	0,250609189	732,0994263	0,207927242	732,090271	0,162320882	732,090271	0,188066825	732,090271	0,178357348
732,1251221	0,34526363	732,1243286	0,122687586	732,1151733	0,145156756	732,1151733	0,23755838	732,1243286	0,104248695	732,1251221	0,250566721	732,1251221	0,366401136	732,1251221	0,241284296	732,1243286	0,178140432	732,1151733	0,148204476	732,1151733	0,181168914	732,1151733	0,16379109
732,1500244	0,304996967	732,149231	0,158086479	732,1400757	0,123208001	732,1400757	0,203439295	732,149231	0,12797159	732,1500244	0,238425612	732,1500244	0,311663002	732,1500244	0,21829994	732,149231	0,222679749	732,1400757	0,120096765	732,1400757	0,146989137	732,1400757	0,125514254
732,1749268	0,347949833	732,1741333	0,183913276	732,164978	0,154198125	732,164978	0,22026965	732,1741333	0,137453631	732,1749268	0,252155811	732,1749268	0,333669782	732,1749268	0,232422218	732,1741333	0,245381132	732,164978	0,145503327	732,164978	0,159743115	732,164978	0,156444639
732,1998291	0,308675826	732,1990356	0,124251463	732,1898804	0,154242128	732,1898804	0,20415248	732,1990356	0,095395274	732,1998291	0,203135207	732,1998291	0,32145524	732,1998291	0,209449589	732,1990356	0,167326614	732,1898804	0,154478207	732,1898804	0,160065576	732,1898804	0,173380256
732,2247314	0,23346591	732,223938	0,133517876	732,2147827	0,105703279	732,2147827	0,123724677	732,223938	0,111589231	732,2247314	0,178718537	732,2247314	0,26587522	732,2247314	0,179262996	732,223938	0,162788063	732,2147827	0,117059842	732,2147827	0,097172879	732,2147827	0,112468369
732,2496338	0,231927291	732,2488403	0,155012473	732,2396851	0,11081887	732,2396851	0,126423985	732,2488403	0,130255342	732,2496338	0,201650694	732,2496338	0,279815614	732,2496338	0,202681288	732,2488403	0,182018816	732,2396851	0,121664792	732,2396851	0,091402464	732,2396851	0,107744321
732,2745361	0,201198712	732,2737427	0,105159536	732,2645874	0,110781819	732,2645874	0,149271771	732,2737427	0,089629538	732,2745361	0,172498837	732,2745361	0,25123331	732,2745361	0,1761944	732,2737427	0,130286932	732,2645874	0,125376374	732,2645874	0,125121728	732,2645874	0,125978693
732,2994385	0,155775592	732,298645	0,119587675	732,2894897	0,076174185	732,2894897	0,112384066	732,298645	0,094764009	732,2994385	0,128316566	732,2994385	0,169197083	732,2994385	0,131752238	732,298645	0,176416039	732,2894897	0,082984611	732,2894897	0,093792163	732,2894897	0,080987662
732,3243408	0,214310035	732,3235474	0,230520368	732,3143921	0,1001122	732,3143921	0,167205095	732,3235474	0,139248952	732,3243408	0,147349015	732,3243408	0,18510741	732,3243408	0,153023258	732,3235474	0,368041396	732,3143921	0,086883932	732,3143921	0,128687263	732,3143921	0,090753444
732,3492432	0,294847578	732,3484497	0,341435283	732,3392944	0,154194772	732,3392944	0,314759076	732,3484497	0,149576873	732,3492432	0,153292492	732,3492432	0,216640815	732,3492432	0,16601418	732,3484497	0,594773412	732,3392944	0,122099243	732,3392944	0,26813966	732,3392944	0,160861537
732,3741455	0,354254663	732,3733521	0,608117223	732,3641968	0,207893446	732,3641968	0,450481415	732,3733521	0,262567073	732,3741455	0,120490417	732,3741455	0,191520602	732,3741455	0,144307032	732,3733521	0,965680003	732,3641968	0,127804637	732,3641968	0,382811904	732,3641968	0,205548033
732,3990479	0,497582525	732,3982544	1,063342571	732,3890991	0,359071702	732,3890991	0,661300242	732,3982544	0,534380019	732,3990479	0,153394714	732,3990479	0,281022012	732,3990479	0,210604221	732,3982544	1,474777937	732,3890991	0,207897887	732,3890991	0,56376344	732,3890991	0,338131607
732,4239502	0,708593547	732,4231567	1,395223856	732,4140015	0,597474217	732,4140015	0,963130295	732,4231567	0,747035146	732,4239502	0,270773202	732,4239502	0,491462529	732,4239502	0,397877961	732,4231567	1,794660687	732,4140015	0,391518146	732,4140015	0,845368922	732,4140015	0,579349697
732,4489136	0,855091095	732,4480591	1,678415179	732,4389038	0,770566761	732,4389038	1,11822772	732,4480591	0,983584642	732,4489136	0,374641329	732,4489136	0,651457727	732,4489136	0,584045172	732,4480591	2,012221813	732,4389038	0,535938382	732,4389038	0,997692645	732,4389038	0,752753258
732,4738159	0,958157599	732,4729614	2,018713236	732,4638062	0,951431155	732,4638062	1,147234082	732,4729614	1,376871824	732,4738159	0,52870065	732,4738159	0,819135547	732,4738159	0,819193244	732,4729614	2,16710043	732,4638062	0,709490657	732,4638062	1,035368204	732,4638062	0,90169394
732,4987183	1,000290155	732,4978638	2,084231138	732,4887085	1,149021745	732,4887085	1,089159608	732,4978638	1,67171371	732,4987183	0,716424584	732,4987183	1,047713637	732,4987183	1,089324832	732,4978638	2,012576818	732,4887085	0,992136061	732,4887085	0,970914602	732,4887085	1,084191561
732,5236206	0,894251585	732,5227661	1,79812336	732,5136108	1,122513533	732,5136108	0,883110404	732,5227661	1,706320763	732,5236206	0,823125064	732,5236206	1,125681162	732,5236206	1,218993664	732,5227661	1,582169175	732,5136108	1,149790883	732,5136108	0,788648725	732,5136108	1,080374599
732,5485229	0,745261729	732,5476685	1,464409828	732,5385742	0,896393001	732,5385742	0,589899004	732,5476685	1,593582749	732,5485229	0,843828142	732,5485229	1,045454264	732,5485229	1,217928767	732,5476685	1,213559151	732,5385742	1,057863593	732,5385742	0,52376765	732,5385742	0,8458004
732,5734253	0,675047874	732,5725708	1,137385249	732,5634766	0,686805487	732,5634766	0,408987582	732,5725708	1,359191298	732,5734253	0,836608708	732,5734253	0,969568968	732,5734253	1,145228267	732,5725708	0,890398979	732,5634766	0,886098444	732,5634766	0,354090065	732,5634766	0,637243688
732,5983276	0,475374073	732,5974731	0,749658942	732,5883789	0,478780687	732,5883789	0,288541883	732,5974731	1,018613338	732,5983276	0,736225545	732,5983276	0,842477083	732,5983276	0,977956474	732,5974731	0,530661821	732,5883789	0,672037721	732,5883789	0,260516644	732,5883789	0,467116416
732,62323	0,274697602	732,6224365	0,492055684	732,6132813	0,277599603	732,6132813	0,15322502	732,6224365	0,747439146	732,62323	0,594549656	732,62323	0,613304555	732,62323	0,765948236	732,6224365	0,340666085	732,6132813	0,427219898	732,6132813	0,145724759	732,6132813	0,268339843
732,6481323	0,219977796	732,6473389	0,380036324	732,6381836	0,193552494	732,6381836	0,122669436	732,6473389	0,553419292	732,6481323	0,48672846	732,6481323	0,430615425	732,6481323	0,581444144	732,6473389	0,279589802	732,6381836	0,287039638	732,6381836	0,103517629	732,6381836	0,180109531
732,6730347	0,202238649	732,6722412	0,231701896	732,6630859	0,156083986	732,6630859	0,138792381	732,6722412	0,350231647	732,6730347	0,384204715	732,6730347	0,337534815	732,6730347	0,44096452	732,6722412	0,168891788	732,6630859	0,219786748	732,6630859	0,122536153	732,6630859	0,165488243
732,697937	0,129154697	732,6971436	0,158092484	732,6879883	0,094178811	732,6879883	0,079149485	732,6971436	0,237260967	732,697937	0,249160543	732,697937	0,222306207	732,697937	0,296312332	732,6971436	0,123176426	732,6879883	0,133087873	732,6879883	0,076219536	732,6879883	0,096131332
732,7228394	0,096752129	732,7220459	0,177425414	732,7128906	0,078990556	732,7128906	0,063775882	732,7220459	0,216000199	732,7228394	0,174593508	732,7228394	0,15618436	732,7228394	0,203108951	732,7220459	0,156576991	732,7128906	0,099815011	732,7128906	0,056135867	732,7128906	0,070883341
732,7477417	0,128786281	732,7469482	0,147278786	732,737793	0,092333853	732,737793	0,0935653	732,7469482	0,169557169	732,7477417	0,166123241	732,7477417	0,161657527	732,7477417	0,18304801	732,7469482	0,131614417	732,737793	0,111599989	732,737793	0,091175772	732,737793	0,095819861
732,772644	0,09889058	732,7718506	0,099592552	732,7626953	0,070195407	732,7626953	0,076171823	732,7718506	0,121180303	732,772644	0,104633495	732,772644	0,113577984	732,772644	0,126275852	732,7718506	0,085497104	732,7626953	0,086849466	732,7626953	0,081577145	732,7626953	0,083614878
732,7975464	0,071421221	732,7967529	0,110600449	732,7875977	0,047059122	732,7875977	0,043737013	732,7967529	0,125912175	732,7975464	0,086901434	732,7975464	0,087500997	732,7975464	0,097277753	732,7967529	0,105853423	732,7875977	0,056800976	732,7875977	0,042628761	732,7875977	0,047424052
732,8224487	0,098019958	732,8216553	0,131528243	732,8125	0,064152241	732,8125	0,062720746	732,8216553	0,12850067	732,8224487	0,103480652	732,8224487	0,118224211	732,8224487	0,116442129	732,8216553	0,12512435	732,8125	0,072691523	732,8125	0,057822186	732,8125	0,06016143
732,8473511	0,081252061	732,8465576	0,080660187	732,8374023	0,0647493	732,8374023	0,079523578	732,8465576	0,085251227	732,8473511	0,079791993	732,8473511	0,096141264	732,8473511	0,091002777	732,8465576	0,072765708	732,8374023	0,074985988	732,8374023	0,0826331	732,8374023	0,077134751
732,8722534	0,055455633	732,87146	0,094698511	732,8623047	0,038266137	732,8623047	0,043173309	732,87146	0,09891472	732,8722534	0,060979992	732,8722534	0,06108005	732,8722534	0,067796804	732,87146	0,092687018	732,8623047	0,046204507	732,8623047	0,044687752	732,8623047	0,039330821
732,8971558	0,101662047	732,8963623	0,128649294	732,887207	0,056503367	732,887207	0,065930873	732,8963623	0,115477569	732,8971558	0,079380319	732,8971558	0,091678917	732,8971558	0,096692063	732,8963623	0,129291132	732,887207	0,058607005	732,887207	0,057329115	732,887207	0,05264819
732,9220581	0,099531263	732,9212646	0,084437445	732,9121094	0,069366716	732,9121094	0,100586712	732,9212646	0,080380015	732,9220581	0,071469702	732,9220581	0,094985239	732,9220581	0,090841331	732,9212646	0,081412017	732,9121094	0,07501135	732,9121094	0,098164678	732,9121094	0,084813848
732,9469604	0,067017242	732,946167	0,08990024	732,9370117	0,047960892	732,9370117	0,069533497	732,946167	0,086814143	732,9469604	0,05673293	732,9469604	0,066532426	732,9469604	0,06623783	732,946167	0,093613617	732,9370117	0,051228993	732,9370117	0,065545022	732,9370117	0,054354906
732,9718628	0,112392411	732,9710693	0,140353486	732,9619141	0,065155894	732,9619141	0,10985031	732,9710693	0,117960982	732,9718628	0,082026757	732,9718628	0,092617556	732,9718628	0,090996057	732,9710693	0,152882114	732,9619141	0,063532025	732,9619141	0,07980039	732,9619141	0,065553077
732,9967651	0,165657327	732,9959717	0,112356462	732,9868164	0,09842024	732,9868164	0,191480577	732,9959717	0,085548729	732,9967651	0,093486644	732,9967651	0,123598382	732,9967651	0,114898056	732,9959717	0,131211907	732,9868164	0,092244148	732,9868164	0,147078529	732,9868164	0,11264655
733,0216675	0,188829169	733,020874	0,111093849	733,0117188	0,092493989	733,0117188	0,198969632	733,020874	0,090660959	733,0216675	0,066859335	733,0216675	0,107557289	733,0216675	0,087767854	733,020874	0,146964014	733,0117188	0,075356402	733,0117188	0,136201009	733,0117188	0,099135287
733,0465698	0,237339377	733,0457764	0,17116338	733,0366211	0,122616611	733,0366211	0,21924977	733,0457764	0,135443136	733,0465698	0,087632425	733,0465698	0,126177728	733,0465698	0,094429091	733,0457764	0,212050796	733,0366211	0,094603188	733,0366211	0,146944359	733,0366211	0,119792089
733,0714722	0,321320683	733,0706787	0,174751803	733,0615234	0,168838084	733,0615234	0,266636759	733,0706787	0,133761317	733,0714722	0,142049789	733,0714722	0,22405228	733,0714722	0,153086141	733,0706787	0,210876644	733,0615234	0,14398554	733,0615234	0,190543458	733,0615234	0,174972489
733,0963745	0,284994066	733,0955811	0,120785855	733,0864258	0,158130169	733,0864258	0,246769637	733,0955811	0,101662576	733,0963745	0,143057868	733,0963745	0,240377843	733,0963745	0,154071465	733,0955811	0,15317519	733,0864258	0,148051605	733,0864258	0,18509312	733,0864258	0,173100501
733,1212769	0,24079375	733,1204834	0,139342606	733,1113281	0,12775512	733,1113281	0,185169324	733,1204834	0,124377392	733,1212769	0,163535699	733,1212769	0,234616578	733,1212769	0,155917719	733,1204834	0,170206785	733,1113281	0,124038517	733,1113281	0,136821896	733,1113281	0,129588664
733,1461792	0,264281392	733,1453857	0,163638249	733,1362915	0,153130814	733,1362915	0,214015141	733,1453857	0,131404757	733,1461792	0,208095998	733,1461792	0,26954186	733,1461792	0,198263407	733,1453857	0,19285056	733,1362915	0,148918092	733,1362915	0,145548701	733,1362915	0,148541972
733,1710815	0,228547394	733,1702881	0,102191076	733,1611938	0,150629714	733,1611938	0,211565927	733,1702881	0,089179583	733,1710815	0,173112497	733,1710815	0,240203738	733,1710815	0,16784814	733,1702881	0,129815608	733,1611938	0,15897207	733,1611938	0,160332173	733,1611938	0,16771628
733,1960449	0,174443528	733,1951904	0,109688349	733,1860962	0,108251847	733,1860962	0,126175523	733,1951904	0,103975184	733,1960449	0,144814253	733,1960449	0,19238764	733,1960449	0,1414821	733,1951904	0,139930427	733,1860962	0,121248469	733,1860962	0,096927732	733,1860962	0,11268083
733,2209473	0,193710208	733,2200928	0,144882694	733,2109985	0,118328005	733,2109985	0,132765859	733,2200928	0,12198773	733,2209473	0,163618267	733,2209473	0,209108844	733,2209473	0,166937575	733,2200928	0,160211369	733,2109985	0,128779799	733,2109985	0,093480222	733,2109985	0,114350677
733,2458496	0,167709842	733,2449951	0,092549011	733,2359009	0,118463106	733,2359009	0,155160487	733,2449951	0,080467433	733,2458496	0,149078578	733,2458496	0,195365563	733,2458496	0,145425513	733,2449951	0,099592939	733,2359009	0,134407789	733,2359009	0,126091719	733,2359009	0,136254609
733,270752	0,109448329	733,2698975	0,093682356	733,2608032	0,078872718	733,2608032	0,112376228	733,2698975	0,088068597	733,270752	0,107174739	733,270752	0,133595616	733,270752	0,11091657	733,2698975	0,109732963	733,2608032	0,088063784	733,2608032	0,0912259	733,2608032	0,089726932
733,2956543	0,129682392	733,2948608	0,151909634	733,2857056	0,105378084	733,2857056	0,137043327	733,2948608	0,12245772	733,2956543	0,122365817	733,2956543	0,149480686	733,2956543	0,129856646	733,2948608	0,191205904	733,2857056	0,095336474	733,2857056	0,099432811	733,2857056	0,095977731
733,3205566	0,16607666	733,3197632	0,158533081	733,3106079	0,136818022	733,3106079	0,199045554	733,3197632	0,095354639	733,3205566	0,1300776	733,3205566	0,166537836	733,3205566	0,138035014	733,3197632	0,236022651	733,3106079	0,124612115	733,3106079	0,163570389	733,3106079	0,142537713
733,345459	0,16239512	733,3446655	0,266079754	733,3355103	0,125906825	733,3355103	0,212436974	733,3446655	0,127833664	733,345459	0,092752405	733,345459	0,125608787	733,345459	0,105174556	733,3446655	0,418947488	733,3355103	0,105118118	733,3355103	0,195103556	733,3355103	0,129846334
733,3703613	0,218705773	733,3695679	0,485735327	733,3604126	0,156583637	733,3604126	0,289158434	733,3695679	0,231155694	733,3703613	0,104556717	733,3703613	0,135576099	733,3703613	0,118489727	733,3695679	0,69519192	733,3604126	0,111873366	733,3604126	0,26271531	733,3604126	0,148512959
733,3952637	0,393300354	733,3944702	0,720477223	733,3853149	0,252047449	733,3853149	0,467131257	733,3944702	0,333306015	733,3952637	0,15072085	733,3952637	0,24429287	733,3952637	0,198736995	733,3944702	0,975143015	733,3853149	0,170604154	733,3853149	0,423106343	733,3853149	0,246233702
733,420166	0,503413677	733,4193726	1,055915117	733,4102173	0,407787591	733,4102173	0,690107882	733,4193726	0,534357786	733,420166	0,171234429	733,420166	0,323896796	733,420166	0,272502989	733,4193726	1,297723413	733,4102173	0,265248746	733,4102173	0,63892442	733,4102173	0,392937332
733,4450684	0,6340186	733,4442749	1,447779894	733,4351196	0,597503543	733,4351196	0,841541052	733,4442749	0,86636889	733,4450684	0,252521276	733,4450684	0,442805082	733,4450684	0,420239627	733,4442749	1,614215374	733,4351196	0,392047137	733,4351196	0,756412446	733,4351196	0,545456886
733,4699707	0,768444419	733,4691772	1,672498226	733,460022	0,83472842	733,460022	0,933683991	733,4691772	1,17095387	733,4699707	0,418747514	733,4699707	0,66479969	733,4699707	0,662911415	733,4691772	1,685513496	733,460022	0,62200433	733,460022	0,820101082	733,460022	0,756829023
733,494873	0,73002553	733,4940796	1,584902287	733,4849243	0,939887166	733,4849243	0,832693815	733,4940796	1,315460443	733,494873	0,526067257	733,494873	0,804236293	733,494873	0,835719109	733,4940796	1,431492686	733,4849243	0,814630568	733,4849243	0,743148029	733,4849243	0,864765048
733,5197754	0,60114634	733,5189819	1,383187056	733,5098267	0,832174063	733,5098267	0,583363414	733,5189819	1,368867517	733,5197754	0,611629784	733,5197754	0,810103536	733,5197754	0,931580305	733,5189819	1,157860994	733,5098267	0,852185488	733,5098267	0,51518786	733,5098267	0,755811214
733,5446777	0,549287021	733,5438843	1,134126425	733,534729	0,680300117	733,534729	0,427469015	733,5438843	1,258902192	733,5446777	0,685986161	733,5446777	0,802669823	733,5446777	0,967548728	733,5438843	0,908574224	733,534729	0,797274947	733,534729	0,367353439	733,534729	0,61655575
733,5695801	0,4699018	733,5687866	0,797298849	733,5596313	0,501330256	733,5596313	0,321226835	733,5687866	0,993728161	733,5695801	0,62762785	733,5695801	0,699310899	733,5695801	0,85888648	733,5687866	0,607953072	733,5596313	0,656326532	733,5596313	0,28797096	733,5596313	0,478283674
733,5944824	0,35823071	733,593689	0,570803583	733,5845337	0,311901629	733,5845337	0,180778116	733,593689	0,777047276	733,5944824	0,523883402	733,5944824	0,577902436	733,5944824	0,717803478	733,593689	0,409584969	733,5845337	0,446025103	733,5845337	0,165743142	733,5845337	0,292095631
733,6193848	0,290149271	733,6185913	0,433026463	733,609436	0,218918875	733,609436	0,140912071	733,6185913	0,612746298	733,6193848	0,478312135	733,6193848	0,528817594	733,6193848	0,640214801	733,6185913	0,315563738	733,609436	0,313169003	733,609436	0,115365945	733,609436	0,198704317
733,6442871	0,234547764	733,6434937	0,269374549	733,6343384	0,172398284	733,6343384	0,147258461	733,6434937	0,403011173	733,6442871	0,415967882	733,6442871	0,438876122	733,6442871	0,537964702	733,6434937	0,185810849	733,6343384	0,240483791	733,6343384	0,132486224	733,6343384	0,175207794
733,6691895	0,140388578	733,668396	0,187060505	733,6592407	0,100390457	733,6592407	0,089692868	733,668396	0,291860759	733,6691895	0,282618016	733,6691895	0,268862128	733,6691895	0,349698693	733,668396	0,13558957	733,6592407	0,146503612	733,6592407	0,087190814	733,6592407	0,107822001
733,6940918	0,09979903	733,6932983	0,179307744	733,6841431	0,087529249	733,6841431	0,075862221	733,6932983	0,256823629	733,6940918	0,199468866	733,6940918	0,167403832	733,6940918	0,23653473	733,6932983	0,147260875	733,6841431	0,110182613	733,6841431	0,064539872	733,6841431	0,079832599
733,7189941	0,131938547	733,7182007	0,170621812	733,7090454	0,098176852	733,7090454	0,09185645	733,7182007	0,203567967	733,7189941	0,171626791	733,7189941	0,171314314	733,7189941	0,202675551	733,7182007	0,14400503	733,7090454	0,116112337	733,7090454	0,077880099	733,7090454	0,096872851
733,7438965	0,096782207	733,743103	0,104038872	733,7340088	0,085327923	733,7340088	0,094236985	733,743103	0,129006833	733,7438965	0,105811819	733,7438965	0,12666285	733,7438965	0,137797579	733,743103	0,084504291	733,7340088	0,104692847	733,7340088	0,092072658	733,7340088	0,097975418
733,7687988	0,068639696	733,7680054	0,117894605	733,7589111	0,053833876	733,7589111	0,051547464	733,7680054	0,134974331	733,7687988	0,088545285	733,7687988	0,088155858	733,7687988	0,103330486	733,7680054	0,104138151	733,7589111	0,065798782	733,7589111	0,051272292	733,7589111	0,052543409
733,7937012	0,105743721	733,7929077	0,139164641	733,7838135	0,070845462	733,7838135	0,07497327	733,7929077	0,135608703	733,7937012	0,109761462	733,7937012	0,117072232	733,7937012	0,125582188	733,7929077	0,130102411	733,7838135	0,076692879	733,7838135	0,060693905	733,7838135	0,067823626
733,8186035	0,08812312	733,8178101	0,086126655	733,8087158	0,071385436	733,8087158	0,087866016	733,8178101	0,085710481	733,8186035	0,081408501	733,8186035	0,101901829	733,8186035	0,096395217	733,8178101	0,074320331	733,8087158	0,080058008	733,8087158	0,081505537	733,8087158	0,084439158
733,8435059	0,063759089	733,8427124	0,099378198	733,8336182	0,043648556	733,8336182	0,044226136	733,8427124	0,102173448	733,8435059	0,062408309	733,8435059	0,061566494	733,8435059	0,073519126	733,8427124	0,090679832	733,8336182	0,047847793	733,8336182	0,044114094	733,8336182	0,046552259
733,8684082	0,087729797	733,8676147	0,128666326	733,8585205	0,060160894	733,8585205	0,06423337	733,8676147	0,120212168	733,8684082	0,084884696	733,8684082	0,092429183	733,8684082	0,095371738	733,8676147	0,122525372	733,8585205	0,061174907	733,8585205	0,054016121	733,8585205	0,057640981
733,8933105	0,107362524	733,8925171	0,083422609	733,8834229	0,072545297	733,8834229	0,092766181	733,8925171	0,079455227	733,8933105	0,093695559	733,8933105	0,118613839	733,8933105	0,108907893	733,8925171	0,070393771	733,8834229	0,076237328	733,8834229	0,087888129	733,8834229	0,087983049
733,9182739	0,060514815	733,9174194	0,078629285	733,9083252	0,041969404	733,9083252	0,052901443	733,9174194	0,081075802	733,9182739	0,056299094	733,9182739	0,064227946	733,9182739	0,068074927	733,9174194	0,075371325	733,9083252	0,047612943	733,9083252	0,05495533	733,9083252	0,047953773
733,9431763	0,073141478	733,9423218	0,123059064	733,9332275	0,056170873	733,9332275	0,072671659	733,9423218	0,114036895	733,9431763	0,067450009	733,9431763	0,062076584	733,9431763	0,072785214	733,9423218	0,130863711	733,9332275	0,056574896	733,9332275	0,062924653	733,9332275	0,055642404
733,9680786	0,125007838	733,9672241	0,104032248	733,9581299	0,084316894	733,9581299	0,13239044	733,9672241	0,090728201	733,9680786	0,090088151	733,9680786	0,106582932	733,9680786	0,097520158	733,9672241	0,114514552	733,9581299	0,080956869	733,9581299	0,114114314	733,9581299	0,095594794
733,992981	0,128407583	733,9921875	0,081583768	733,9830322	0,0663433	733,9830322	0,122620545	733,9921875	0,06973812	733,992981	0,055440206	733,992981	0,073000804	733,992981	0,068724997	733,9921875	0,1027648	733,9830322	0,067191847	733,9830322	0,104795881	733,9830322	0,081597723
734,0178833	0,184017316	734,0170898	0,129264906	734,0079346	0,064233221	734,0079346	0,1291603	734,0170898	0,099591509	734,0178833	0,072089724	734,0178833	0,08659558	734,0178833	0,072220564	734,0170898	0,181269988	734,0079346	0,054195087	734,0079346	0,09475375	734,0079346	0,063121729
734,0427856	0,319132566	734,0419922	0,16993916	734,0328369	0,106996976	734,0328369	0,21112451	734,0419922	0,115361422	734,0427856	0,115738116	734,0427856	0,176151872	734,0427856	0,125829831	734,0419922	0,241720602	734,0328369	0,088019274	734,0328369	0,161522597	734,0328369	0,111280262
734,067688	0,360295445	734,0668945	0,140881523	734,0577393	0,127721235	734,0577393	0,252851725	734,0668945	0,096982099	734,067688	0,109861329	734,067688	0,213960215	734,067688	0,127064168	734,0668945	0,205701247	734,0577393	0,110048681	734,0577393	0,205371991	734,0577393	0,153757274
734,0925903	0,3420901	734,0917969	0,169494286	734,0826416	0,118287034	734,0826416	0,20773752	734,0917969	0,130978435	734,0925903	0,140115857	734,0925903	0,246404469	734,0925903	0,143777385	734,0917969	0,223344103	734,0826416	0,102049552	734,0826416	0,160562456	734,0826416	0,12929152
734,1174927	0,344936997	734,1166992	0,185978234	734,1075439	0,150578439	734,1075439	0,218387842	734,1166992	0,150283515	734,1174927	0,222227439	734,1174927	0,341660917	734,1174927	0,214282304	734,1166992	0,227313995	734,1075439	0,13811776	734,1075439	0,163854226	734,1075439	0,156694263
734,142395	0,278184742	734,1416016	0,116257451	734,1324463	0,152370989	734,1324463	0,216322452	734,1416016	0,101640992	734,142395	0,212387741	734,142395	0,308198959	734,142395	0,201905683	734,1416016	0,148297161	734,1324463	0,153794885	734,1324463	0,171832561	734,1324463	0,169056967
734,1672974	0,208688423	734,1665039	0,119086459	734,1573486	0,115001477	734,1573486	0,136999428	734,1665039	0,110451519	734,1672974	0,188317046	734,1672974	0,240335226	734,1672974	0,161754251	734,1665039	0,144568339	734,1573486	0,11737819	734,1573486	0,106421173	734,1573486	0,119064756
734,1921997	0,215738237	734,1914063	0,145961195	734,182251	0,120743833	734,182251	0,1375577	734,1914063	0,127480388	734,1921997	0,199909076	734,1921997	0,2479624	734,1921997	0,178750247	734,1914063	0,166829497	734,182251	0,128084064	734,182251	0,103061274	734,182251	0,120172083
734,2171021	0,21575056	734,2163086	0,094034895	734,2071533	0,120107844	734,2071533	0,152841285	734,2163086	0,078381956	734,2171021	0,184547812	734,2171021	0,232240543	734,2171021	0,172819108	734,2163086	0,110752359	734,2071533	0,132663131	734,2071533	0,128613949	734,2071533	0,133658528
734,2420044	0,15447472	734,2412109	0,094865024	734,2320557	0,075735465	734,2320557	0,105387278	734,2412109	0,082743511	734,2420044	0,128629103	734,2420044	0,166339219	734,2420044	0,118580841	734,2412109	0,118914567	734,2320557	0,086954035	734,2320557	0,085118197	734,2320557	0,082048722
734,2669067	0,152140245	734,2661133	0,14333874	734,256958	0,089225754	734,256958	0,12704967	734,2661133	0,116576806	734,2669067	0,136240631	734,2669067	0,152645007	734,2669067	0,121625327	734,2661133	0,178708449	734,256958	0,088976547	734,256958	0,089255579	734,256958	0,086148836
734,2918091	0,186615169	734,2910156	0,123459451	734,2818604	0,114954725	734,2818604	0,173233554	734,2910156	0,098221719	734,2918091	0,144094124	734,2918091	0,171788514	734,2918091	0,137951836	734,2910156	0,16384095	734,2818604	0,108582802	734,2818604	0,1309807	734,2818604	0,121726349
734,3167114	0,14934577	734,315918	0,111545458	734,3067627	0,110096514	734,3067627	0,170574486	734,315918	0,078882702	734,3167114	0,095833413	734,3167114	0,136683449	734,3167114	0,105923139	734,315918	0,172497839	734,3067627	0,102097876	734,3067627	0,139305696	734,3067627	0,123455249
734,3416138	0,166333154	734,3408203	0,204151273	734,3317261	0,101659596	734,3317261	0,161138639	734,3408203	0,127271235	734,3416138	0,101183787	734,3416138	0,122845732	734,3416138	0,10644301	734,3408203	0,322167546	734,3317261	0,08088699	734,3317261	0,133268431	734,3317261	0,09968514
734,3665161	0,279555321	734,3657227	0,342881292	734,3566284	0,159895539	734,3566284	0,291315973	734,3657227	0,174826056	734,3665161	0,137159899	734,3665161	0,193931624	734,3665161	0,158344045	734,3657227	0,52818042	734,3566284	0,121821001	734,3566284	0,234327435	734,3566284	0,156635687
734,3914185	0,362931997	734,390625	0,485092908	734,3815308	0,229004472	734,3815308	0,438864112	734,390625	0,229949847	734,3914185	0,126310855	734,3914185	0,221361473	734,3914185	0,174915299	734,390625	0,723434508	734,3815308	0,163103923	734,3815308	0,374376267	734,3815308	0,234175175
734,4163208	0,428830355	734,4155273	0,768402338	734,4064331	0,322119087	734,4064331	0,524208546	734,4155273	0,411778063	734,4163208	0,157574609	734,4163208	0,294586897	734,4163208	0,249317288	734,4155273	1,006696224	734,4064331	0,200758651	734,4064331	0,464385092	734,4064331	0,299625844
[truncated: 99,014 more rows]
